# Supplementary material
Source: PubMed Central journal article supplement (PMC10292866)
Supplement: NIHMS1903335-supplement-SI.pdf [file NIHMS1903335-supplement-SI.pdf]

# Molecular Editing of Aza-arene C–H Bonds by Distance, Geometry and Chirality

Zhoulong Fan,<sup>1</sup> Xiangyang Chen,<sup>2</sup> Keita Tanaka,<sup>1</sup> Han Seul Park,<sup>1</sup> Nelson Y. S. Lam,<sup>1</sup> Jonathan J. Wong,<sup>2</sup> K.

N. Houk,<sup>2,\*</sup> Jin-Quan Yu<sup>1,\*</sup>

<sup>1</sup>Department of Chemistry, The Scripps Research Institute, 10550 North Torrey Pines Road, La Jolla, California 92037, United States. <sup>2</sup>Department of Chemistry and Biochemistry, University of California, Los Angeles, California 90095, United States.

## Table of Contents

|                                                                                              |     |
|----------------------------------------------------------------------------------------------|-----|
| 1. General Information .....                                                                 | 2   |
| 2. Experimental Section .....                                                                | 3   |
| 2.1 Preparation of Templates and Template Chaperones .....                                   | 3   |
| 2.2 Preparation and Determination Absolute Configuration of ( <i>S,S</i> )- <b>T25</b> ..... | 50  |
| 2.3 Condition Optimization and Template Chaperone Role .....                                 | 56  |
| 2.4 General Procedure for C6-Selective C–H Olefination .....                                 | 64  |
| 2.5 General Procedure for C7-Selective C–H Olefination .....                                 | 68  |
| 2.6 General Procedure for C6-Selective C–H Alkynylation .....                                | 73  |
| 2.7 General Procedure for C6-Selective C–H Allylation .....                                  | 74  |
| 2.8 General Procedure for C7-Selective C–H Alkynylation .....                                | 74  |
| 2.9 Recycling of Pd and Analysis of Remaining Pd in Product .....                            | 75  |
| 2.10 Procedure for Remote Site-Selective C–H Activation of Camptothecin .....                | 77  |
| 2.11 Procedure for Synthesis of Cabozantinib Analogue <b>12</b> .....                        | 79  |
| 2.12 Procedure for Synthesis of Chloroquine Analogue <b>13</b> .....                         | 81  |
| 2.13 Procedure for Iterative C–H Activation of Quinoline .....                               | 82  |
| 2.14 Isotopic Labelling Studies .....                                                        | 85  |
| 2.15 Kinetic Isotope Effect (KIE) Studies .....                                              | 91  |
| 2.16 Spectroscopic Data of Compounds .....                                                   | 94  |
| 3. Computational Studies .....                                                               | 142 |
| 3.1 Computational Methods .....                                                              | 142 |
| 3.2 Methods Benchmark .....                                                                  | 142 |
| 3.3 Cartesian Coordinates .....                                                              | 176 |
| 4. X-ray Crystallographic Data .....                                                         | 256 |
| 5. NMR Spectra .....                                                                         | 263 |
| 6. References .....                                                                          | 630 |

## 1. General Information

All reactions were performed in round-bottom flasks, sealed tubes or vials. Liquids and solutions were transferred with syringes and pipettes. Unless otherwise stated, all solvents and chemical reagents were obtained from commercial sources and used without further purifications. The analytical thin layer chromatography was performed on 0.25 mm silica gel 60-F254 and spots were visualized by UV light at 254 nm. Column chromatography was performed using E. Merck silica (60, particle size 0.043-0.063 mm), and preparative TLC (pTLC) was performed on Merck silica plates (60F254).  $^1\text{H}$  and  $^{13}\text{C}$  NMR were recorded on Bruker AVIII HD 600 NMR spectrometer equipped with a 5 mm CPDCH (C-H) CryoProbe. Chemical shifts were quoted in parts per million (ppm) referenced to 0.00 ppm for tetramethylsilane. The residual solvent peaks were used as internal standard ( $\text{CDCl}_3$ : 7.26 ppm  $^1\text{H}$  NMR, 77.16 ppm  $^{13}\text{C}$  NMR;  $\text{CD}_3\text{OD}$ : 3.31 ppm  $^1\text{H}$  NMR, 49.00 ppm  $^{13}\text{C}$  NMR; Acetone- $d_6$ : 2.05 ppm  $^1\text{H}$  NMR, 29.84 ppm  $^{13}\text{C}$  NMR). NMR data is denoted with apparent multiplicities: s = singlet, d = doublet, t = triplet, q = quartet, and combinations thereof.  $^{19}\text{F}$  NMR spectra were recorded on Bruker AV NEO 399 NMR spectrometer equipped with a 5 mm BBFO Smart Probe, and were fully decoupled by broad band proton decoupling. High-resolution mass spectra (HRMS) were recorded on an Agilent Mass spectrometer using ESI-TOF (electrospray ionization-time of flight). Chiral separation and detection were conducted on the Agilent Technologies supercritical fluid chromatography (SFC) system using commercially available chiral columns. IR spectra were recorded with a Nicolet 380 FTIR with an ATR attachment and selected peaks are reported in  $\text{cm}^{-1}$ . Melting points (mp) were measured on a Stuart SMP50 automatic melting point apparatus and are uncorrected. Optical rotations were recorded on a Rudolph Research Analytical Autopol III Automatic Polarimeter. The single crystal X-ray diffraction studies were carried out on a Bruker Smart APEX II CCD diffractometer equipped with  $\text{Cu K}_\alpha$  radiation or Bruker D8-Venture 3-circle diffractometer equipped with a Photon 3 detector and  $\text{Mo K}_\alpha$  radiation.

## 2. Experimental Section

### 2.1 Preparation of Templates and Template Chaperones

#### Synthesis of **S1**

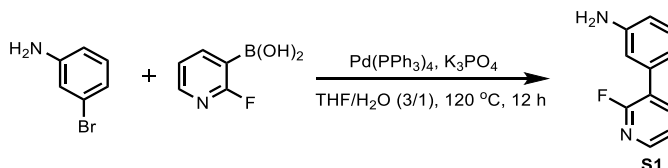

To a solution of  $\text{K}_3\text{PO}_4$  (1.27 g, 6 mmol) in water (10 mL) was added 3-bromoaniline (516 mg, 3 mmol), 2-fluoro-3-pyridylboronic acid (634 mg, 4.5 mmol),  $\text{Pd}(\text{PPh}_3)_4$  (347 mg, 0.3 mmol), and THF (30 mL). The Schlenk tube was evacuated and refilled with nitrogen three times, then sealed and put into a preheated oil bath at  $120\text{ }^\circ\text{C}$  for 12 h. After completion, the reaction mixture was cooled to room temperature. Water (100 mL) was added and the mixture was extracted with EA (50 mL x 3). The combined organic layers were dried with  $\text{Na}_2\text{SO}_4$  and concentrated. The residue was purified by silica gel chromatography eluting with hexane/ethyl acetate (EA) (70/30, v/v) to provide the product **S1** (441 mg, 78% yield) as pale yellow oil.  $^1\text{H}$  NMR (600 MHz,  $\text{CDCl}_3$ )  $\delta$  8.18 (dt,  $J = 4.8, 1.5$  Hz, 1H), 7.85 (ddd,  $J = 9.6, 7.4, 2.0$  Hz, 1H), 7.26 – 7.22 (m, 2H), 6.94 (d,  $J = 7.7$  Hz, 1H), 6.88 (s, 1H), 6.76 – 6.70 (m, 1H), 3.78 (s, 2H).  $^{13}\text{C}$  NMR (151 MHz,  $\text{CDCl}_3$ )  $\delta$  160.41 (d,  $J = 240.5$  Hz), 146.64, 146.20, 146.10, 140.63 (d,  $J = 4.4$  Hz), 134.93 (d,  $J = 4.9$  Hz), 129.65, 124.08 (d,  $J = 28.2$  Hz), 121.71 (d,  $J = 4.4$  Hz), 119.10, 115.29 (d,  $J = 28.8$  Hz).  $^{19}\text{F}$  NMR (376 MHz,  $\text{CDCl}_3$ )  $\delta$  -73.28. HRMS (ESI-TOF)  $m/z$  Calcd for  $\text{C}_{11}\text{H}_{10}\text{FN}_2^+$   $[\text{M}+\text{H}]^+$  189.0828, found 189.0828.

#### Synthesis of **S4a,b**

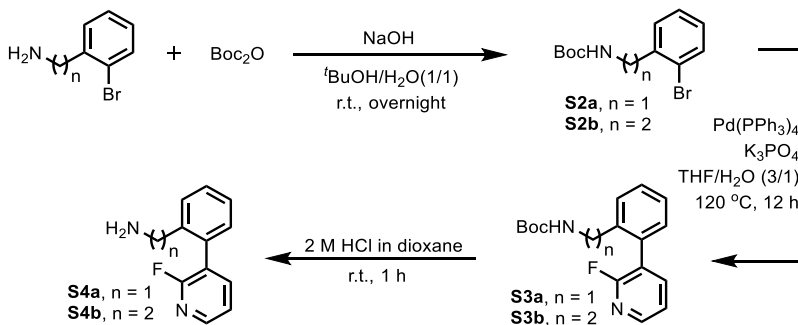

To a solution of NaOH (480 mg, 12 mmol) in water (6 mL) was added Boc<sub>2</sub>O (1.57 g, 7.2 mmol), <sup>t</sup>BuOH (6 mL) and amine (6 mmol). The resulting mixture was stirred at room temperature for overnight. After completion, the reaction mixture was extracted with EA (50 mL x 3). The organic layers were collected, dried with Na<sub>2</sub>SO<sub>4</sub>, and concentrated. The residue was purified by silica gel chromatography eluting with hexane/EA (97/3, v/v) to provide the product **S2a** (or **S2b**).

For **S2a**: (1.1 g, colorless oil, 65% yield) <sup>1</sup>H NMR (600 MHz, CDCl<sub>3</sub>) δ 7.54 (dd, *J* = 7.9, 1.2 Hz, 1H), 7.38 (d, *J* = 7.7 Hz, 1H), 7.29 (td, *J* = 7.5, 1.3 Hz, 1H), 7.14 (td, *J* = 7.7, 1.8 Hz, 1H), 5.02 (s, 1H), 4.39 (d, *J* = 6.3 Hz, 2H), 1.45 (s, 9H). <sup>13</sup>C NMR (151 MHz, CDCl<sub>3</sub>) δ 155.74, 137.97, 132.74, 129.78, 128.96, 127.66, 123.55, 79.66, 44.90, 28.40. HRMS (ESI-TOF) *m/z* Calcd for C<sub>8</sub>H<sub>9</sub>BrNO<sub>2</sub><sup>+</sup> [M-<sup>t</sup>Bu+2H]<sup>+</sup> 229.9817, found 229.9824.

For **S2b**: (1.6 g, pale white solid, 89% yield) <sup>1</sup>H NMR (600 MHz, CDCl<sub>3</sub>) δ 7.54 (d, *J* = 7.6 Hz, 1H), 7.26 – 7.18 (m, 2H), 7.09 (ddd, *J* = 7.9, 6.8, 2.2 Hz, 1H), 4.60 (s, 1H), 3.39 (t, *J* = 6.9 Hz, 2H), 2.95 (t, *J* = 7.1 Hz, 2H), 1.43 (s, 9H). <sup>13</sup>C NMR (151 MHz, CDCl<sub>3</sub>) δ 155.85, 138.41, 132.91, 131.03, 128.16, 127.54, 124.63, 79.23, 40.26, 36.38, 28.41. HRMS (ESI-TOF) *m/z* Calcd for C<sub>9</sub>H<sub>11</sub>BrNO<sub>2</sub><sup>+</sup> [M-<sup>t</sup>Bu+2H]<sup>+</sup> 243.9973, found 243.9980.

Following the procedure for synthesis of **S1** with 3 mmol of **S2a** (or **S2b**), the residue was purified by silica gel chromatography eluting with hexane/EA (85/15, v/v) to provide the product **S3a** (or **S3b**).

For **S3a**: (725 mg, colorless oil, 80% yield) <sup>1</sup>H NMR (600 MHz, CDCl<sub>3</sub>) δ 8.27 – 8.23 (m, 1H), 7.72 (ddd, *J* = 9.4, 7.3, 1.9 Hz, 1H), 7.49 (d, *J* = 7.7 Hz, 1H), 7.44 – 7.41 (m, 1H), 7.37 – 7.34 (m, 1H), 7.28 (ddd, *J* = 7.1, 4.9, 1.9 Hz, 1H), 7.21 (dd, *J* = 7.6, 1.4 Hz, 1H), 4.77 (s, 1H), 4.19 (s, 2H), 1.42 (s, 9H). <sup>13</sup>C NMR (151 MHz, CDCl<sub>3</sub>) δ 160.35 (d, *J* = 237.8 Hz), 155.67, 147.13 (d, *J* = 15.3 Hz), 141.94 (d, *J* = 4.9 Hz), 137.31, 132.97 (d, *J* = 4.5 Hz), 130.41, 129.12, 128.42, 127.53, 122.83 (d, *J* = 32.3 Hz), 121.59 (d, *J* = 4.7 Hz), 79.55, 42.24, 28.37. <sup>19</sup>F NMR (376 MHz, CDCl<sub>3</sub>) δ -71.48. HRMS (ESI-TOF) *m/z* Calcd for C<sub>13</sub>H<sub>12</sub>FN<sub>2</sub>O<sub>2</sub><sup>+</sup> [M-<sup>t</sup>Bu+2H]<sup>+</sup> 247.0883, found 247.0888.

For **S3b**: (787 mg, pale yellow oil, 83% yield) <sup>1</sup>H NMR (600 MHz, CDCl<sub>3</sub>) δ 8.25 (ddd, *J* = 4.9, 2.0, 1.1 Hz, 1H), 7.71 (ddd, *J* = 9.4, 7.3, 2.0 Hz, 1H), 7.39 (td, *J* = 7.5, 1.4 Hz, 1H), 7.35 (d, *J* = 7.7 Hz, 1H), 7.31 (td, *J* = 7.4, 1.5 Hz, 1H), 7.28 (ddd, *J* = 7.1, 4.9, 1.8 Hz, 1H), 7.19 (dd, *J* = 7.6,

1.4 Hz, 1H), 4.45 (s, 1H), 3.23 (q,  $J = 6.9$  Hz, 2H), 2.69 (t,  $J = 7.2$  Hz, 2H), 1.39 (s, 9H).  $^{13}\text{C}$  NMR (151 MHz,  $\text{CDCl}_3$ )  $\delta$  160.40 (d,  $J = 238.1$  Hz), 155.68, 146.95 (d,  $J = 14.6$  Hz), 142.15 (d,  $J = 5.5$  Hz), 137.36, 133.86 (d,  $J = 3.9$  Hz), 130.46, 129.60, 128.94, 126.62, 123.54 (d,  $J = 32.0$  Hz), 121.47 (d,  $J = 4.8$  Hz), 79.22, 40.89, 33.44, 28.40.  $^{19}\text{F}$  NMR (376 MHz,  $\text{CDCl}_3$ )  $\delta$  -71.14. HRMS (ESI-TOF)  $m/z$  Calcd for  $\text{C}_{14}\text{H}_{14}\text{FN}_2\text{O}_2^+$  [ $\text{M}-\text{tBu}+2\text{H}$ ] $^+$  261.1039, found 261.1044.

Adding **S3a** (or **S3b**) (2.5 mmol) into a 2N HCl solution (14 mL). The reaction mixture was stirred at room temperature for 1 h. The mixture was basified with 10% aqueous NaOH solution (100 mL) and extracted with EA (50 mL x 3). The combined organic layers were dried with  $\text{Na}_2\text{SO}_4$  and concentrated to give the crude product **S4a** (or **S4b**). This product was used in the next step without further purification.

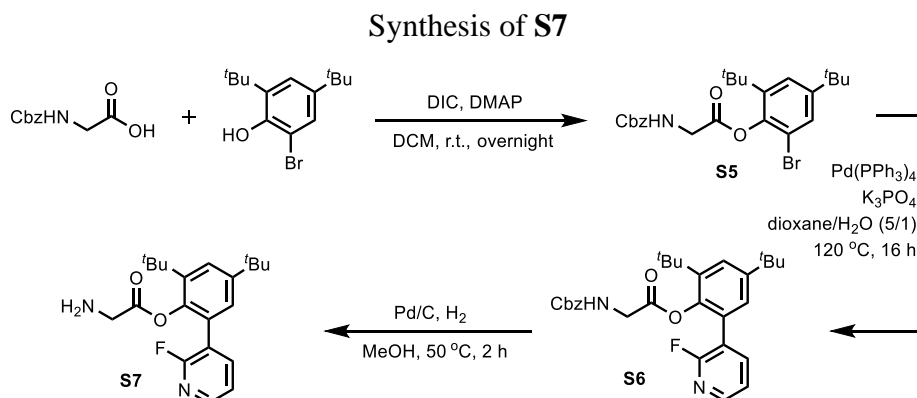

To a solution of Cbz-Gly-OH (2.51 g, 12 mmol), 4-bromo-2,6-di-tert-butylphenol (2.85 g, 10 mmol), and DMAP (183 mg, 1.5 mmol) in DCM (50 mL) at  $0^\circ\text{C}$  was added DIC (2.32 mL, 15 mmol). The solution was warmed to room temperature and stirred for overnight. The insolubles were filtered and discarded. The filtrate was evaporated and purified by silica gel chromatography eluting with hexane/EA (92/8, v/v) to provide the product **S5** (3.5 g, 74% yield) as colorless oil.  $^1\text{H}$  NMR (600 MHz,  $\text{CDCl}_3$ )  $\delta$  7.45 (d,  $J = 2.3$  Hz, 1H), 7.39 – 7.30 (m, 6H), 5.37 (s, 1H), 5.16 (s, 2H), 4.34 (d,  $J = 5.7$  Hz, 2H), 1.32 (s, 9H), 1.30 (s, 9H).  $^{13}\text{C}$  NMR (151 MHz,  $\text{CDCl}_3$ )  $\delta$  168.05, 156.15, 150.14, 143.91, 143.07, 136.13, 128.56, 128.44, 128.24, 128.15, 123.90, 117.57, 67.23, 43.56, 35.34, 34.85, 31.29, 30.43. HRMS (ESI-TOF)  $m/z$  Calcd for  $\text{C}_{24}\text{H}_{31}\text{BrNO}_4^+$  [ $\text{M}+\text{H}$ ] $^+$  476.1436, found 476.1435.

Following the procedure for synthesis of **S1** with dioxane instead of THF as a co-solvent with 5 mmol of **S5**, the residue was purified by silica gel chromatography eluting with hexane/EA (70/30, v/v) to provide the product **S6** (345 mg, 14% yield) as a white solid.  $^1\text{H}$  NMR (600 MHz,  $\text{CDCl}_3$ )  $\delta$  8.20 (d,  $J = 4.0$  Hz, 1H), 7.72 (t,  $J = 7.6$  Hz, 1H), 7.51 (d,  $J = 2.3$  Hz, 1H), 7.33 (h,  $J = 6.7, 6.1$  Hz, 5H), 7.23 – 7.19 (m, 1H), 7.18 (s, 1H), 5.08 (s, 2H), 5.03 – 4.96 (m, 1H), 3.86 (s, 2H), 1.37 (s, 9H), 1.34 (s, 9H).  $^{13}\text{C}$  NMR (151 MHz,  $\text{CDCl}_3$ )  $\delta$  168.19, 163.33, 160.34 (d,  $J = 240.5$  Hz), 155.84, 148.99, 147.14 (d,  $J = 14.4$  Hz), 144.18, 142.31 (d,  $J = 5.5$  Hz), 141.22, 136.09, 128.53, 128.23, 128.12, 126.10, 125.32, 121.32 (d,  $J = 4.9$  Hz), 120.97 (d,  $J = 30.2$  Hz), 67.14, 43.01, 35.00, 34.83, 31.42, 30.50.  $^{19}\text{F}$  NMR (376 MHz,  $\text{CDCl}_3$ )  $\delta$  -71.35. HRMS (ESI-TOF)  $m/z$  Calcd for  $\text{C}_{29}\text{H}_{34}\text{FN}_2\text{O}_4^+$   $[\text{M}+\text{H}]^+$  493.2503, found 493.2506.

To a stirred solution of **S6** (340 mg, 0.7 mmol) in MeOH (5 mL) was added Pd/C (70 mg). The resulting mixture was stirred at 50 °C for 2 h under hydrogen atmosphere. Upon completion, the reaction mixture was filtered. The filtrate was concentrated to afford the crude amine **S7**, which was used in the next step without further purification.

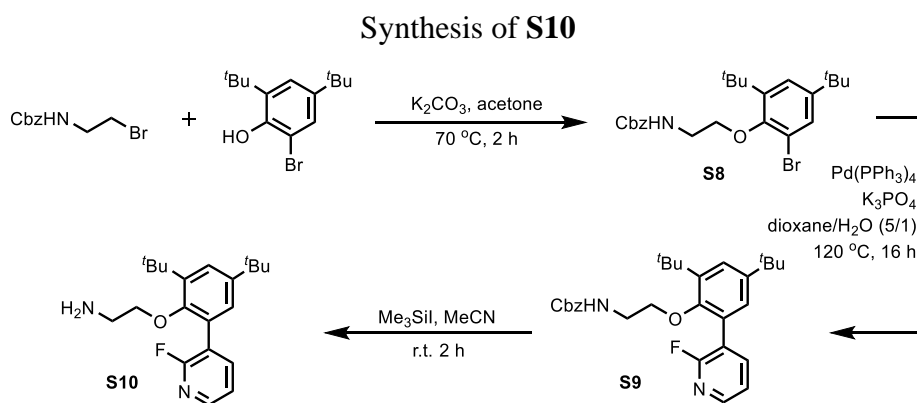

Benzyl 2-bromoethylcarbamate (2.06 g, 8 mmol), 4-bromo-2,6-di-tert-butylphenol (2.28 g, 8 mmol), and  $\text{K}_2\text{CO}_3$  (2.76 g, 20 mmol) were charged in the flask and acetone (50 mL) was added to this mixture. The resulting mixture was refluxed for 2 h. The insolubles were filtered and discarded. The filtrate was evaporated and purified by silica gel chromatography eluting with hexane/EA (88/12, v/v) to provide the product **S8** (3.3 g, 89% yield) as colorless oil.  $^1\text{H}$  NMR (600 MHz,  $\text{CDCl}_3$ )  $\delta$  7.40 – 7.34 (m, 5H), 7.34 – 7.30 (m, 1H), 7.28 (d,  $J = 2.4$  Hz, 1H), 5.35 (s, 1H), 5.15 (s, 2H), 4.13 (t,  $J = 5.1$  Hz, 2H), 3.66 (q,  $J = 5.4$  Hz, 2H), 1.36 (s, 9H), 1.28 (s, 9H).  $^{13}\text{C}$  NMR (151 MHz,  $\text{CDCl}_3$ )  $\delta$  156.55, 151.78, 147.66, 144.13, 136.66, 128.95, 128.52, 128.12,

128.09, 123.95, 117.82, 71.09, 66.71, 41.34, 35.80, 34.59, 31.32, 31.08. HRMS (ESI-TOF)  $m/z$  Calcd for  $C_{24}H_{33}BrNO_3^+$   $[M+H]^+$  462.1644, found 462.1642.

Following the procedure for synthesis of **S6** with 5 mmol of **S8**, the residue was purified by silica gel chromatography eluting with hexane/EA (70/30, v/v) to provide the product **S9** (287 mg, 12% yield) as pale yellow oil.  $^1H$  NMR (600 MHz,  $CDCl_3$ )  $\delta$  8.16 – 8.09 (m, 1H), 7.86 (ddd,  $J = 9.4, 7.4, 2.0$  Hz, 1H), 7.41 (d,  $J = 2.5$  Hz, 1H), 7.39 (d,  $J = 4.4$  Hz, 4H), 7.35 – 7.33 (m, 1H), 7.18 – 7.15 (m, 1H), 7.14 (s, 1H), 5.08 (s, 2H), 4.88 (s, 1H), 3.49 – 3.46 (m, 2H), 3.22 (q,  $J = 5.3$  Hz, 2H), 1.41 (s, 9H), 1.32 (s, 9H).  $^{13}C$  NMR (151 MHz,  $CDCl_3$ )  $\delta$  160.48 (d,  $J = 239.7$  Hz), 156.12, 153.19, 146.73, 146.63, 146.11, 142.39, 142.07 (d,  $J = 6.1$  Hz), 136.60, 128.54, 128.17, 128.14, 126.86 – 126.33 (m), 125.13, 122.21 (d,  $J = 32.0$  Hz), 121.30 (d,  $J = 5.5$  Hz), 71.61, 66.67, 40.87, 35.41, 34.60, 31.45, 30.99.  $^{19}F$  NMR (376 MHz,  $CDCl_3$ )  $\delta$  -71.59. HRMS (ESI-TOF)  $m/z$  Calcd for  $C_{29}H_{36}FN_2O_3^+$   $[M+H]^+$  479.2710, found 479.2711.

To a stirred solution of **S9** (250 mg, 0.52 mmol) in MeCN (5 mL) was added  $Me_3SiI$  (370  $\mu$ L, 2.6 mmol). The resulting mixture was stirred at room temperature for 2 h. The reaction was quenched with MeOH. The resulting mixture was concentrated to give the crude amine **S10**, which was used in the next step without further purification.

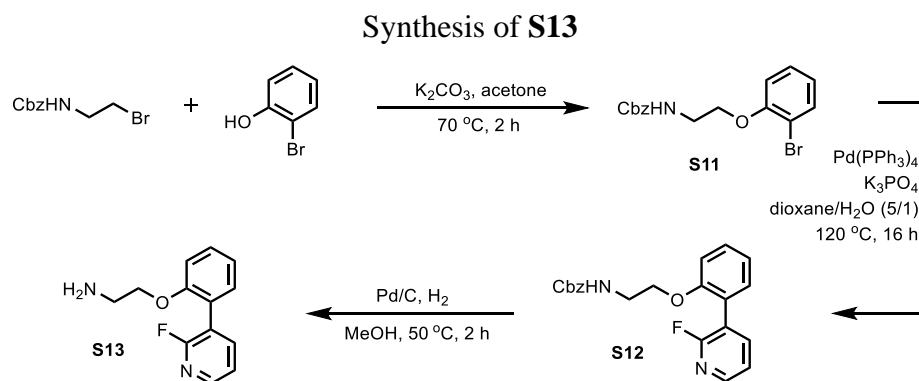

Following the procedure for synthesis of **S8** with 5 mmol of 2-bromophenol, the residue was purified by silica gel chromatography eluting with hexane/EA (85/15, v/v) to provide the product **S11** (1.3 g, 75% yield) as colorless oil.  $^1H$  NMR (600 MHz,  $CDCl_3$ )  $\delta$  7.53 (dd,  $J = 7.9, 1.6$  Hz, 1H), 7.37 – 7.33 (m, 4H), 7.31 (ddd,  $J = 8.5, 5.2, 2.5$  Hz, 1H), 7.26 – 7.22 (m, 1H), 6.90 – 6.87 (m, 1H), 6.87 – 6.84 (m, 1H), 5.33 (s, 1H), 5.12 (s, 2H), 4.10 (t,  $J = 5.1$  Hz, 2H), 3.66 (q,  $J = 5.4$  Hz, 2H).  $^{13}C$  NMR (151 MHz,  $CDCl_3$ )  $\delta$  156.44, 154.82, 136.41, 133.40, 128.59, 128.55, 128.17,

128.14, 122.49, 113.65, 112.40, 68.43, 66.87, 40.53. HRMS (ESI-TOF)  $m/z$  Calcd for  $C_{16}H_{16}BrNO_3Na^+$   $[M+Na]^+$  372.0211, found 372.0211.

Following the procedure for synthesis of **S6** with 3.7 mmol of **S11**, the residue was purified by silica gel chromatography eluting with hexane/EA (70/30, v/v) to provide the product **S12** (596 mg, 44% yield) as colorless oil.  $^1H$  NMR (600 MHz,  $CDCl_3$ )  $\delta$  8.19 (d,  $J = 4.4$  Hz, 1H), 7.76 (ddd,  $J = 9.3, 7.3, 2.0$  Hz, 1H), 7.38 (t,  $J = 8.0$  Hz, 1H), 7.35 (d,  $J = 4.4$  Hz, 4H), 7.33 – 7.29 (m, 1H), 7.28 (dd,  $J = 7.5, 1.8$  Hz, 1H), 7.22 (t,  $J = 5.8$  Hz, 1H), 7.07 (td,  $J = 7.5, 1.0$  Hz, 1H), 6.97 (d,  $J = 8.3$  Hz, 1H), 5.09 (s, 2H), 5.03 (s, 1H), 4.08 (t,  $J = 5.1$  Hz, 2H), 3.52 (q,  $J = 5.4$  Hz, 2H).  $^{13}C$  NMR (151 MHz,  $CDCl_3$ )  $\delta$  160.70 (d,  $J = 239.8$  Hz), 156.39, 155.63, 146.48 (d,  $J = 14.7$  Hz), 145.41, 142.06 (d,  $J = 5.4$  Hz), 136.48, 131.20, 130.20, 128.51, 128.10, 128.06, 123.48 – 123.38 (m), 121.33 – 121.22 (m), 112.15, 67.52, 66.76, 40.50.  $^{19}F$  NMR (376 MHz,  $CDCl_3$ )  $\delta$  -70.80. HRMS (ESI-TOF)  $m/z$  Calcd for  $C_{21}H_{20}FN_2O_3^+$   $[M+H]^+$  367.1458, found 367.1458.

Following the procedure for synthesis of **S7** with Pd/C (40%, w/w) with 1 mmol of **S12**. The crude product **S13** was obtained and used in the next step without further purification.

#### Synthesis of **S15**

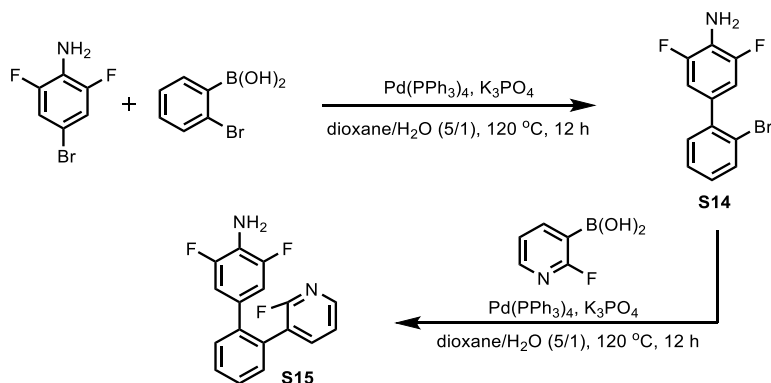

Following the procedure for synthesis of **S6** with 3 mmol of 4-bromo-2,6-difluoroaniline, the residue was purified by silica gel chromatography eluting with hexane/EA (95/5, v/v) to provide the product **S14** (699 mg, 82% yield) as a brown solid.  $^1H$  NMR (600 MHz,  $CDCl_3$ )  $\delta$  7.64 (dd,  $J = 8.0, 1.3$  Hz, 1H), 7.33 (td,  $J = 7.5, 1.3$  Hz, 1H), 7.27 (dd,  $J = 7.6, 1.8$  Hz, 1H), 7.20 – 7.16 (m, 1H), 6.92 (dd,  $J = 7.3, 2.0$  Hz, 2H), 3.80 (s, 2H).  $^{13}C$  NMR (151 MHz,  $CDCl_3$ )  $\delta$  151.35 (dd,  $J = 240.2, 8.6$  Hz), 140.67, 133.28, 131.21, 129.88 (t,  $J = 9.0$  Hz), 128.87, 127.49, 123.41 (t,  $J = 16.5$



(Hz), 122.61, 112.27 (dd,  $J = 16.7, 6.4$  Hz).  $^{19}\text{F}$  NMR (376 MHz,  $\text{CDCl}_3$ )  $\delta$  -135.51. HRMS (ESI-TOF)  $m/z$  Calcd for  $\text{C}_{12}\text{H}_9\text{BrF}_2\text{N}^+$   $[\text{M}+\text{H}]^+$  283.9886, found 283.9894.

Following the procedure for synthesis of **S6** with 1 mmol of **S14**, the residue was purified by silica gel chromatography eluting with hexane/EA (85/15, v/v) to provide the product **S15** (177 mg, 59% yield) as a white solid.  $^1\text{H}$  NMR (600 MHz,  $\text{CDCl}_3$ )  $\delta$  8.14 (ddd,  $J = 4.9, 2.0, 1.1$  Hz, 1H), 7.57 (ddd,  $J = 9.5, 7.4, 2.0$  Hz, 1H), 7.47 (td,  $J = 7.5, 1.5$  Hz, 1H), 7.43 (td,  $J = 7.5, 1.6$  Hz, 1H), 7.41 – 7.37 (m, 2H), 7.14 (ddd,  $J = 7.3, 4.9, 1.8$  Hz, 1H), 6.59 (dd,  $J = 7.4, 2.0$  Hz, 2H), 3.68 (s, 2H).  $^{13}\text{C}$  NMR (151 MHz,  $\text{CDCl}_3$ )  $\delta$  160.99, 159.40, 151.55 (dd,  $J = 240.1, 8.5$  Hz), 146.61 (d,  $J = 14.4$  Hz), 142.19 (d,  $J = 4.5$  Hz), 139.88 (d,  $J = 2.7$  Hz), 132.43 (d,  $J = 4.5$  Hz), 130.90 (d,  $J = 1.7$  Hz), 130.20, 128.93, 127.58, 123.71 (d,  $J = 30.8$  Hz), 122.89, 121.27 (d,  $J = 4.5$  Hz), 111.89 (dd,  $J = 16.5, 6.2$  Hz).  $^{19}\text{F}$  NMR (376 MHz,  $\text{CDCl}_3$ )  $\delta$  -71.42, -135.22. HRMS (ESI-TOF)  $m/z$  Calcd for  $\text{C}_{17}\text{H}_{12}\text{F}_3\text{N}_2^+$   $[\text{M}+\text{H}]^+$  301.0953, found 301.0952.

#### Synthesis of **S18**<sup>1,2</sup> and **S21**

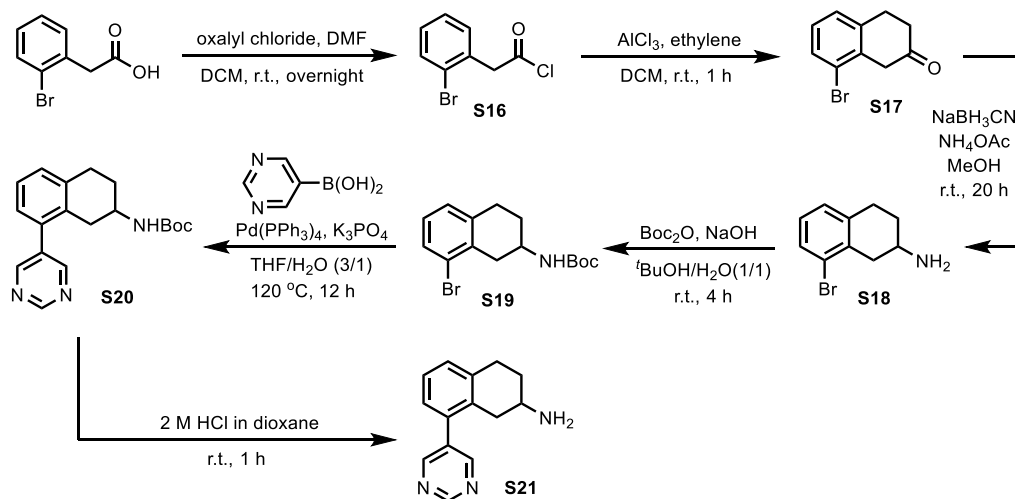

To a stirred solution of 2-bromophenylacetic acid (25 g, 116.3 mmol) in DCM (200 mL) at 0 °C was added DMF (100  $\mu\text{L}$ ) and oxalyl chloride (10.83 mL, 127.9 mmol). The reaction solution was warmed to room temperature and stirred for overnight. The mixture was concentrated to obtain the crude product **S16**, which was used in the next step without further purification.

To a stirred suspension of high-quality  $\text{AlCl}_3$  (31 g, 232.6 mmol) in DCM (150 mL) at -10 °C was added a solution of **S16** (116.3 mmol) in DCM (100 mL) over 30 min. Then, ethylene was bubbled into the reaction mixture at -10 °C for 1 h. After full conversion (GC-MS detection), the

ethylene flow was stopped and the reaction mixture continued to be stirred at -10 °C for 15 min. Then the mixture was poured slowly into a beaker containing lots of ice. [Caution: addition of ice into the reaction mixture causes significant exotherms which can lead to explosions] The layers were separated, and the collected organic phase was sequentially washed with water (500 mL x 2), saturated NaHCO<sub>3</sub> solution (500 mL), and brine, dried with Na<sub>2</sub>SO<sub>4</sub>, and concentrated. The residue was dissolved in MeCN (200 mL), washed with pentane to remove polyethylene, and concentrated to give the product **S17** (24 g, 92% for two steps) as a pale black solid, which was used in the next step without further purification.

To a solution of **S17** (24 g, 106.7 mmol) and NH<sub>4</sub>OAc (65.8 g, 853.6 mmol) in MeOH (250 mL) at room temperature was added NaBH<sub>3</sub>CN (8 g, 128 mmol). The resulting mixture was stirred for 20 h. The reaction mixture was basified with 10% aqueous NaOH solution (250 mL) and evaporated. Then water (500 mL) was added and the solution was extracted with EA (200 mL x 3). The organic phase was washed with brine, dried with Na<sub>2</sub>SO<sub>4</sub>, and concentrated to afford the crude product **S18** as brown oil, which was used in the next step without further purification.

Following the procedure for synthesis of **S2a** with 30 mmol of crude **S18**, the residue was purified by silica gel chromatography eluting with hexane/EA (95/5, v/v) to provide the product **S19** (3.3 g, 34% yield for above two steps) as a white solid. <sup>1</sup>H NMR (600 MHz, CDCl<sub>3</sub>) δ 7.39 (d, *J* = 7.7 Hz, 1H), 7.05 (d, *J* = 7.0 Hz, 1H), 6.99 (t, *J* = 7.7 Hz, 1H), 4.60 (s, 1H), 3.98 (s, 1H), 3.16 (dd, *J* = 17.2, 5.6 Hz, 1H), 2.88 (q, *J* = 6.7, 5.4 Hz, 2H), 2.52 (dd, *J* = 17.1, 8.5 Hz, 1H), 2.09 – 2.01 (m, 1H), 1.72 – 1.64 (m, 1H), 1.47 (s, 9H). <sup>13</sup>C NMR (151 MHz, CDCl<sub>3</sub>) δ 155.24, 134.04, 130.10, 127.94, 127.22, 125.75, 79.43, 46.60, 36.88, 28.78, 28.44, 28.10. HRMS (ESI-TOF) *m/z* Calcd for C<sub>11</sub>H<sub>13</sub>BrNO<sub>2</sub><sup>+</sup> [M+H]<sup>+</sup> 270.0130, found 270.0139.

Following the procedure for synthesis of **S1** with 4.3 mmol of **S19** and 8.6 mmol of 5-pyrimidinylboronic acid, the residue was purified by silica gel chromatography eluting with hexane/EA (85/15, v/v) to provide the product **S20** (1.22 g, 87% yield) as pale yellow glue. <sup>1</sup>H NMR (600 MHz, CDCl<sub>3</sub>) δ 9.21 (s, 1H), 8.69 (s, 2H), 7.25 (d, *J* = 7.4 Hz, 1H), 7.22 (d, *J* = 7.6 Hz, 1H), 7.04 (d, *J* = 7.3 Hz, 1H), 4.56 (s, 1H), 3.91 (s, 1H), 2.99 (t, *J* = 6.6 Hz, 2H), 2.87 (dd, *J* = 16.3, 5.1 Hz, 1H), 2.47 (dd, *J* = 16.3, 8.8 Hz, 1H), 2.12 (s, 1H), 1.73 (ddt, *J* = 9.8, 7.8, 2.0 Hz, 1H), 1.41 (s, 9H). <sup>13</sup>C NMR (151 MHz, CDCl<sub>3</sub>) δ 157.38, 156.61, 155.11, 136.79, 135.00,

134.80, 132.37, 129.78, 127.78, 126.44, 79.51, 46.46, 34.98, 28.99, 28.39, 28.06. HRMS (ESI-TOF)  $m/z$ . Calcd for  $C_{19}H_{24}N_3O_2^+$   $[M+H]^+$  326.1869, found 326.1865.

Following the procedure for synthesis of **S4a** with 2.2 mmol of **S20**. The crude product **S21** was obtained and used in the next step without further purification.

### Synthesis of **S28**

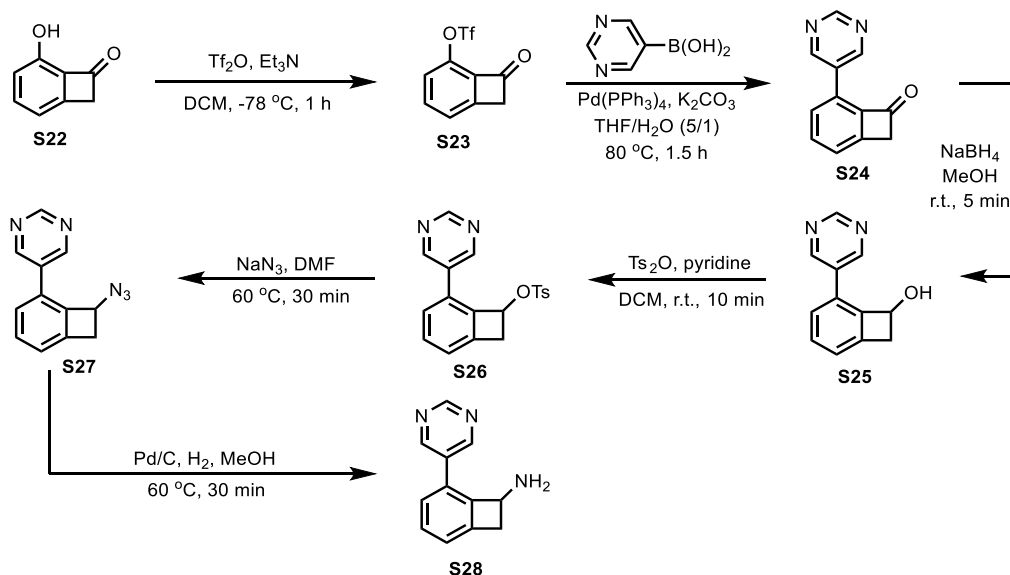

**S23** was synthesized according to modified literature procedures:<sup>3</sup> To a stirred solution of **S22** (1.6 g, 12 mmol) in DCM (100 mL) at  $-78\text{ }^\circ\text{C}$  was sequentially added  $\text{Et}_3\text{N}$  (3.34 mL, 24 mmol) and  $\text{Tf}_2\text{O}$  (3.03 mL, 18 mmol). The reaction solution was stirred at  $-78\text{ }^\circ\text{C}$  for 1 h. Saturated  $\text{NH}_4\text{Cl}$  solution (100 mL) was added to quench the reaction. Then water (150 mL) was added and the solution was extracted with DCM (50 mL x 3). The combined organic layers were dried with  $\text{Na}_2\text{SO}_4$  and concentrated. The residue was purified by silica gel chromatography eluting with hexane/EA (85/15, v/v) to provide **S23** (3.1 g, 97% yield) as colorless oil.

For **S22**:<sup>4</sup>  $^1\text{H}$  NMR (600 MHz,  $\text{CDCl}_3$ )  $\delta$  7.45 (dd,  $J = 8.4, 7.1$  Hz, 1H), 7.01 (d,  $J = 7.1$  Hz, 1H), 6.79 (d,  $J = 8.5$  Hz, 1H), 3.90 (s, 2H).  $^{13}\text{C}$  NMR (151 MHz,  $\text{CDCl}_3$ )  $\delta$  181.27, 152.58, 150.56, 138.60, 132.10, 116.20, 114.97, 51.16.

For **S23**:  $^1\text{H}$  NMR (600 MHz,  $\text{CDCl}_3$ )  $\delta$  7.68 – 7.64 (m, 1H), 7.58 (d,  $J = 7.3$  Hz, 1H), 7.27 – 7.25 (m, 1H), 4.10 (s, 2H).  $^{13}\text{C}$  NMR (151 MHz,  $\text{CDCl}_3$ )  $\delta$  181.69, 152.48, 139.25, 137.71,

137.45, 123.92, 121.31, 118.69 (q,  $J = 320.9$  Hz), 53.41.  $^{19}\text{F}$  NMR (376 MHz,  $\text{CDCl}_3$ )  $\delta$  -75.54. HRMS (ESI-TOF)  $m/z$  Calcd for  $\text{C}_9\text{H}_6\text{F}_3\text{O}_4\text{S}^+$   $[\text{M}+\text{H}]^+$  266.9939, found 266.9944.

To a solution of  $\text{K}_2\text{CO}_3$  (1.7 g, 12.5 mmol) in water (4 mL) was added **S23** (565 mg, 2.5 mmol), 5-pyrimidinylboronic acid (620 mg, 5 mmol),  $\text{Pd}(\text{PPh}_3)_4$  (289 mg, 0.25 mmol), and THF (20 mL). The Schlenk tube was evacuated and refilled with nitrogen for three times. Then sealed and put into a preheated oil bath at 80 °C for 1.5 h. After completion, the reaction mixture was cooled to room temperature. Water (100 mL) was added and the mixture was extracted with EA (50 mL x 3). The combined organic layers were dried with  $\text{Na}_2\text{SO}_4$  and concentrated. The residue was purified by silica gel chromatography eluting with hexane/EA (60/40, v/v) to provide the product **S24** (299 mg, 61% yield) as a white flocculent solid.  $^1\text{H}$  NMR (600 MHz,  $\text{CDCl}_3$ )  $\delta$  9.37 (s, 2H), 9.24 (s, 1H), 7.75 (d,  $J = 7.8$  Hz, 1H), 7.68 (t,  $J = 7.6$  Hz, 1H), 7.61 (d,  $J = 7.3$  Hz, 1H), 4.09 (s, 2H).  $^{13}\text{C}$  NMR (151 MHz,  $\text{CDCl}_3$ )  $\delta$  187.18, 158.60, 155.44, 152.15, 144.78, 136.00, 129.03, 129.02, 125.49, 124.08, 52.12. HRMS (ESI-TOF)  $m/z$  Calcd for  $\text{C}_{12}\text{H}_9\text{N}_2\text{O}^+$   $[\text{M}+\text{H}]^+$  197.0715, found 197.0713.

To a solution of **S24** (98 mg, 0.5 mmol) in MeOH (5 mL) at room temperature was slowly added  $\text{NaBH}_4$  (38 mg, 1 mmol). The resulting mixture was stirred for 5 min. The reaction mixture was evaporated. Then water (50 mL) was added and the solution was extracted with EA (20 mL x 3). The organic phase was washed with brine, dried with  $\text{Na}_2\text{SO}_4$ , and concentrated to afford the crude product **S25** (99 mg, quant.) as a white solid.  $^1\text{H}$  NMR (600 MHz,  $\text{CDCl}_3$ )  $\delta$  9.21 (s, 2H), 9.14 (s, 1H), 7.52 (d,  $J = 7.9$  Hz, 1H), 7.45 (t,  $J = 7.6$  Hz, 1H), 7.23 (d,  $J = 7.2$  Hz, 1H), 5.45 (ddd,  $J = 8.4, 4.5, 1.9$  Hz, 1H), 3.71 (dd,  $J = 14.3, 4.5$  Hz, 1H), 3.21 – 3.13 (m, 2H).  $^{13}\text{C}$  NMR (151 MHz,  $\text{CDCl}_3$ )  $\delta$  157.39, 155.38, 145.26, 143.47, 131.09, 130.71, 129.48, 124.62, 124.31, 70.85, 42.48. HRMS (ESI-TOF)  $m/z$  Calcd for  $\text{C}_{12}\text{H}_{11}\text{N}_2\text{O}^+$   $[\text{M}+\text{H}]^+$  199.0871, found 199.0874.

To a solution of **S25** (99 mg, 0.5 mmol) in DCM (5 mL) at room temperature was added pyridine (402  $\mu\text{L}$ , 5 mmol) and  $\text{Ts}_2\text{O}$  (815 mg, 2.5 mmol). The resulting mixture was stirred for 5 min. Water (10 mL) was added and the mixture was extracted with DCM (5 mL x 3). The combined organic layers were dried with  $\text{Na}_2\text{SO}_4$  and concentrated. The residue was purified by silica gel chromatography eluting with DCM/EA (50/50, v/v) to provide the product **S26** (176 mg, quant.) as a white solid.  $^1\text{H}$  NMR (600 MHz,  $\text{CDCl}_3$ )  $\delta$  9.19 (s, 1H), 8.90 (s, 2H), 7.86 (d,  $J = 8.3$  Hz,

2H), 7.51 (t,  $J = 7.6$  Hz, 1H), 7.45 (d,  $J = 7.9$  Hz, 1H), 7.37 (d,  $J = 8.0$  Hz, 2H), 7.21 (d,  $J = 7.1$  Hz, 1H), 5.83 (dd,  $J = 4.2, 1.8$  Hz, 1H), 3.66 (dd,  $J = 14.8, 4.2$  Hz, 1H), 3.44 (d,  $J = 14.8$  Hz, 1H), 2.46 (s, 3H).  $^{13}\text{C}$  NMR (151 MHz,  $\text{CDCl}_3$ )  $\delta$  157.88, 155.25, 145.33, 143.60, 139.12, 133.05, 132.13, 130.52, 130.36, 130.09, 128.04, 126.05, 123.98, 75.00, 40.22, 21.72. HRMS (ESI-TOF)  $m/z$  Calcd for  $\text{C}_{19}\text{H}_{17}\text{N}_2\text{O}_3\text{S}^+$   $[\text{M}+\text{H}]^+$  353.0960, found 353.0958.

To a solution of **S26** (176 mg, 0.5 mmol) in DMF (5 mL) was added  $\text{NaN}_3$  (98 mg, 1.5 mmol). The reaction mixture was stirred at 60 °C for 30 min. Then water (10 mL) was added and the mixture was extracted with EA (10 mL x 3). The combined organic layers were dried with  $\text{Na}_2\text{SO}_4$  and concentrated. The residue was purified by silica gel chromatography eluting with DCM/EA (70/30, v/v) to provide the product **S27** (89 mg, 80% yield) as colorless oil.  $^1\text{H}$  NMR (600 MHz,  $\text{CDCl}_3$ )  $\delta$  9.22 (s, 1H), 9.08 (s, 2H), 7.53 – 7.48 (m, 2H), 7.24 (d,  $J = 6.9$  Hz, 1H), 5.06 (d,  $J = 2.8$  Hz, 1H), 3.73 (dd,  $J = 14.5, 4.8$  Hz, 1H), 3.43 – 3.36 (m, 1H).  $^{13}\text{C}$  NMR (151 MHz,  $\text{CDCl}_3$ )  $\delta$  157.83, 155.19, 143.63, 140.82, 131.22, 130.81, 129.73, 125.68, 124.11, 59.29, 38.21. HRMS (ESI-TOF)  $m/z$  Calcd for  $\text{C}_{12}\text{H}_{10}\text{N}_5^+$   $[\text{M}+\text{H}]^+$  224.0936, found 224.0942.

Following the procedure for synthesis of **S7** with 0.4 mmol of **S27** at 60 °C for 30 min. The crude product **S28** was obtained and used in the next step without further purification.

#### Synthesis of **S29**

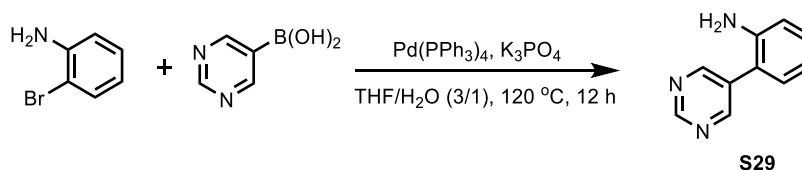

Following the procedure for synthesis of **S1**, purification by silica gel chromatography eluting with hexane/EA (50/50, v/v) afforded product **S29** (328 mg, 64% yield) as a pale yellow solid.  $^1\text{H}$  NMR (600 MHz,  $\text{CDCl}_3$ )  $\delta$  9.20 (s, 1H), 8.88 (s, 2H), 7.25 (td,  $J = 7.7, 1.6$  Hz, 1H), 7.10 (dd,  $J = 7.6, 1.6$  Hz, 1H), 6.89 (td,  $J = 7.5, 1.2$  Hz, 1H), 6.81 (dd,  $J = 8.1, 1.2$  Hz, 1H), 3.72 (s, 2H).  $^{13}\text{C}$  NMR (151 MHz,  $\text{CDCl}_3$ )  $\delta$  157.44, 156.97, 143.86, 133.41, 130.56, 130.26, 119.97, 119.36, 116.28. HRMS (ESI-TOF)  $m/z$  Calcd for  $\text{C}_{10}\text{H}_{10}\text{N}_3^+$   $[\text{M}+\text{H}]^+$  172.0875, found 172.0875.

#### Synthesis of **S31**<sup>5</sup>

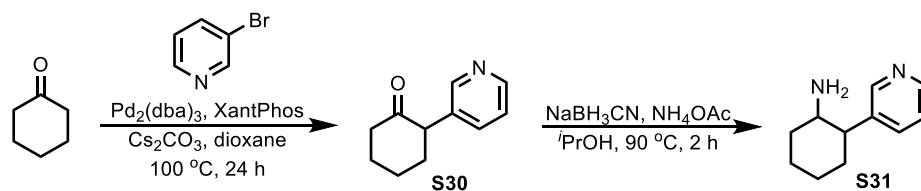

To a solution of  $\text{Pd}_2(\text{dba})_3$  (14 mg, 0.015 mmol), XantPhos (21 mg, 0.036 mmol), and  $\text{Cs}_2\text{CO}_3$  (2.15g, 6.6 mmol) in dioxane (3 mL) was added cyclohexanone (622  $\mu\text{L}$ , 6 mmol) and 3-bromopyridine (289  $\mu\text{L}$ , 3 mmol). The Schlenk tube was evacuated and refilled with nitrogen for three times. Then sealed and put into a preheated oil bath at 100  $^\circ\text{C}$  for 24 h. After completion, the reaction mixture was cooled to room temperature. Water (100 mL) was added and the mixture was extracted with EA (50 mL x 3). The combined organic layers were dried with  $\text{Na}_2\text{SO}_4$  and concentrated. The residue was purified by silica gel chromatography eluting with hexane/EA (50/50, v/v) to provide the product **S30** (140 mg, 27% yield) as a pale yellow solid.  $^1\text{H}$  NMR (600 MHz,  $\text{CDCl}_3$ )  $\delta$  8.50 (dd,  $J = 4.8, 1.7$  Hz, 1H), 8.38 (d,  $J = 2.2$  Hz, 1H), 7.49 (dt,  $J = 7.8, 2.0$  Hz, 1H), 7.29 – 7.26 (m, 1H), 3.63 (dd,  $J = 12.7, 5.5$  Hz, 1H), 2.56 (dddd,  $J = 13.9, 4.6, 3.1, 1.5$  Hz, 1H), 2.53 – 2.46 (m, 1H), 2.32 – 2.27 (m, 1H), 2.21 (ddq,  $J = 9.2, 6.0, 3.2$  Hz, 1H), 2.03 (dddd,  $J = 8.4, 6.7, 4.1, 2.8$  Hz, 1H), 1.99 – 1.94 (m, 1H), 1.85 (dddd,  $J = 16.2, 8.9, 4.2, 1.9$  Hz, 2H).  $^{13}\text{C}$  NMR (151 MHz,  $\text{CDCl}_3$ )  $\delta$  209.18, 149.91, 148.29, 136.29, 134.29, 123.25, 54.93, 42.22, 35.43, 27.80, 25.45. HRMS (ESI-TOF)  $m/z$  Calcd for  $\text{C}_{11}\text{H}_{14}\text{NO}^+$   $[\text{M}+\text{H}]^+$  176.1075, found 176.1081.

To a solution of **S30** (100 mg, 0.57 mmol) and  $\text{NH}_4\text{OAc}$  (439 mg, 5.7 mmol) in *i*PrOH (5 mL) at room temperature was added  $\text{NaBH}_3\text{CN}$  (71 mg, 1.14 mmol). The sealed tube was put into a preheated oil bath at 90  $^\circ\text{C}$  for 2 h. The reaction mixture was basified with 10% aqueous  $\text{NaOH}$  solution (50 mL) and evaporated. Then water (50 mL) was added and the solution was extracted with EA (20 mL x 3). The organic phase was washed with brine, dried with  $\text{Na}_2\text{SO}_4$ , and concentrated to afford the crude product **S31** as brown oil, which was used in the next step without further purification.

### Synthesis of **S35**<sup>6</sup>

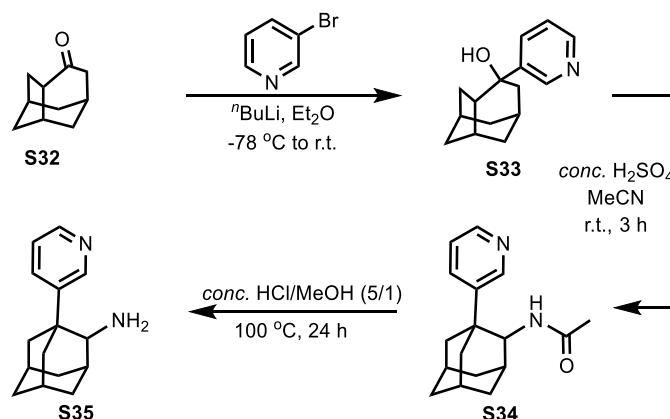

To a solution of 3-bromopyridine (586  $\mu\text{L}$ , 6 mmol) in  $\text{Et}_2\text{O}$  (20 mL) at  $-78\text{ }^\circ\text{C}$  was slowly added  $t\text{BuLi}$  (6 mmol). **S32** (450 mg, 3 mmol) in  $\text{Et}_2\text{O}$  (10 mL) was added after the solution was stirred for 30 min. The reaction mixture was stirred for 2 h ( $-78\text{ }^\circ\text{C}$ , 1 h; r.t., 1h). Cooling to  $0\text{ }^\circ\text{C}$ , saturated  $\text{NH}_4\text{Cl}$  solution (50 mL) was added to quench the reaction. Then saturated  $\text{NaHCO}_3$  solution (100 mL) was added and the solution was extracted with EA (50 mL x 3). The organic phase was washed with brine, dried with  $\text{Na}_2\text{SO}_4$ , and concentrated. The residue was purified by silica gel chromatography eluting with hexane/EA (15/85, v/v) to provide the product **S33** (289 mg, 42% yield) as a white solid.

For **S32**:  $^1\text{H}$  NMR (600 MHz,  $\text{CDCl}_3$ )  $\delta$  2.76 – 2.71 (m, 1H), 2.62 (q,  $J = 6.0$  Hz, 1H), 2.55 (dd,  $J = 17.9, 2.7$  Hz, 1H), 2.44 – 2.39 (m, 1H), 2.32 – 2.27 (m, 1H), 2.25 (dt,  $J = 9.6, 4.7$  Hz, 1H), 2.00 – 1.93 (m, 2H), 1.83 – 1.79 (m, 1H), 1.74 (dtt,  $J = 11.4, 4.1, 2.0$  Hz, 1H), 1.71 – 1.66 (m, 2H), 1.64 (dd,  $J = 11.2, 2.7$  Hz, 1H), 1.54 (ddd,  $J = 13.1, 5.2, 2.4$  Hz, 1H).  $^{13}\text{C}$  NMR (151 MHz,  $\text{CDCl}_3$ )  $\delta$  216.79, 51.18, 45.09, 41.43, 38.18, 37.44, 37.31, 37.20, 34.88, 29.58.

For **S33**: *Diastereomer 1*:  $^1\text{H}$  NMR (600 MHz,  $\text{CDCl}_3$ )  $\delta$  8.75 (d,  $J = 2.4$  Hz, 1H), 8.47 (dd,  $J = 4.8, 1.6$  Hz, 1H), 7.82 (ddd,  $J = 8.1, 2.4, 1.6$  Hz, 1H), 7.28 – 7.26 (m, 1H), 2.79 – 2.74 (m, 1H), 2.48 (q,  $J = 6.3$  Hz, 1H), 2.41 – 2.36 (m, 1H), 2.33 – 2.23 (m, 2H), 2.23 – 2.16 (m, 2H), 1.97 (s, 1H), 1.84 (ddt,  $J = 13.6, 5.6, 2.8$  Hz, 1H), 1.77 – 1.72 (m, 2H), 1.61 (dd,  $J = 11.0, 3.0$  Hz, 1H), 1.47 (dd,  $J = 12.4, 3.1$  Hz, 1H), 1.37 (dt,  $J = 13.2, 3.0$  Hz, 1H), 1.27 (dt,  $J = 12.8, 2.5$  Hz, 1H).  $^{13}\text{C}$  NMR (151 MHz,  $\text{CDCl}_3$ )  $\delta$  148.10, 147.70, 144.22, 133.73, 123.22, 75.46, 44.96, 42.36, 41.75, 39.75, 36.30, 35.85, 33.79, 32.30, 28.79. HRMS (ESI-TOF)  $m/z$  Calcd for  $\text{C}_{15}\text{H}_{20}\text{NO}^+$   $[\text{M}+\text{H}]^+$  230.1545, found 230.1548. *Diastereomer 2*:  $^1\text{H}$  NMR (600 MHz,  $\text{CDCl}_3$ )  $\delta$  8.91 (d,  $J = 2.5$  Hz, 1H), 8.49 (dd,  $J = 4.7, 1.6$  Hz, 1H), 7.95 (dt,  $J = 8.1, 2.0$  Hz, 1H), 7.28 (dd,  $J = 8.1, 4.7$

Hz, 1H), 2.92 – 2.85 (m, 1H), 2.80 (dd,  $J = 14.6, 8.9$  Hz, 1H), 2.35 – 2.29 (m, 1H), 2.26 (t,  $J = 4.2$  Hz, 1H), 2.22 (ddd,  $J = 13.1, 3.1, 1.5$  Hz, 1H), 2.13 – 2.04 (m, 2H), 1.88 (dddd,  $J = 13.0, 10.5, 5.2, 2.3$  Hz, 2H), 1.82 – 1.76 (m, 2H), 1.54 (dd,  $J = 10.8, 3.1$  Hz, 2H), 1.20 – 1.16 (m, 2H).  $^{13}\text{C}$  NMR (151 MHz,  $\text{CDCl}_3$ )  $\delta$  148.31, 148.07, 144.12, 134.19, 123.20, 74.09, 45.02, 42.45, 41.79, 40.17, 35.64, 34.72, 34.14, 31.43, 29.13. HRMS (ESI-TOF)  $m/z$  Calcd for  $\text{C}_{15}\text{H}_{20}\text{NO}^+$   $[\text{M}+\text{H}]^+$  230.1545, found 230.1544.

To 10 ml of MeCN at 0 °C was slowly added *conc.*  $\text{H}_2\text{SO}_4$  (3.75 mL) and **S33** (114 mg, 1.5 mmol). The reaction mixture was warm to room temperature and stirred for 3 h. Then the mixture was poured into ice and basified with 10% KOH solution (100 mL). The suspension was filtered and the solid residue was washed with water and hexane. Using rotovap to dry the residue gave product **S34** (284 mg, 70% yield) as colorless oil.  $^1\text{H}$  NMR (600 MHz,  $\text{CDCl}_3$ )  $\delta$  8.54 (d,  $J = 2.5$  Hz, 1H), 8.45 (d,  $J = 3.5$  Hz, 1H), 7.70 (dt,  $J = 8.1, 2.0$  Hz, 1H), 7.25 (dd,  $J = 8.0, 4.8$  Hz, 1H), 5.43 (d,  $J = 9.1$  Hz, 1H), 4.49 (d,  $J = 8.9$  Hz, 1H), 2.20 – 2.12 (m, 3H), 2.07 – 1.99 (m, 4H), 1.91 (dq,  $J = 12.9, 2.8$  Hz, 1H), 1.83 – 1.79 (m, 1H), 1.78 – 1.74 (m, 2H), 1.74 (s, 3H), 1.73 – 1.68 (m, 2H).  $^{13}\text{C}$  NMR (151 MHz,  $\text{CDCl}_3$ )  $\delta$  169.01, 147.73, 147.07, 141.88, 133.37, 123.31, 55.29, 45.77, 38.67, 36.70, 36.47, 34.97, 32.75, 30.90, 28.19, 27.60, 23.39. HRMS (ESI-TOF)  $m/z$  Calcd for  $\text{C}_{17}\text{H}_{23}\text{N}_2\text{O}^+$   $[\text{M}+\text{H}]^+$  271.1810, found 271.1813.

To a solution of **S34** (100 mg, 0.37 mmol) in MeOH (2 mL) was added 10 mL of *conc.* HCl. The solution was put into a preheated oil bath at 100 °C for 24 h. The reaction mixture was evaporated and basified with 10% aqueous NaOH solution (50 mL). Then water (50 mL) was added and the solution was extracted with EA (20 mL x 3). The organic phase was washed with brine, dried with  $\text{Na}_2\text{SO}_4$ , and concentrated to afford the crude product **S35** as brown oil, which was used in the next step without further purification.

### Synthesis of **S39**



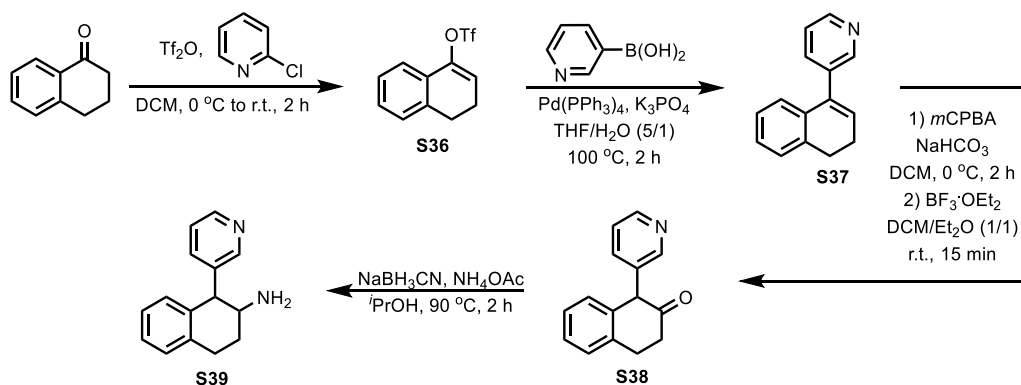

To a solution of  $\alpha$ -tetralone (4.55 mL, 34.2 mmol) and 2-chloropyridine (3.5 mL, 37.6 mmol) in DCM (100 mL) at 0 °C was slowly added  $\text{ Tf}_2\text{O}$  (6.4 mL, 37.6 mmol) under  $\text{N}_2$  protection. The reaction mixture was warm to room temperature and stirred for 2 h. After completion, the mixture was evaporated, and redissolved in hexane. The solution was filtered and the filtrate was concentrated. The residue was purified by silica gel chromatography eluting with hexane to provide the product **S36** (4.9 g, 52% yield) as pale yellow oil.  $^1\text{H}$  NMR (600 MHz,  $\text{CDCl}_3$ )  $\delta$  7.36 – 7.32 (m, 1H), 7.27 – 7.24 (m, 2H), 7.17 (dd,  $J$  = 5.2, 3.6 Hz, 1H), 6.01 (t,  $J$  = 4.8 Hz, 1H), 2.87 (t,  $J$  = 8.2 Hz, 2H), 2.51 (td,  $J$  = 8.2, 4.8 Hz, 2H).  $^{13}\text{C}$  NMR (151 MHz,  $\text{CDCl}_3$ )  $\delta$  146.37, 136.22, 129.18, 129.18, 128.67, 127.75, 126.94, 121.23, 117.74, 116.50 (d,  $J$  = 320.2 Hz), 26.85, 22.32.  $^{19}\text{F}$  NMR (376 MHz,  $\text{CDCl}_3$ )  $\delta$  -76.33. HRMS (ESI-TOF)  $m/z$  Calcd for  $\text{C}_{11}\text{H}_{10}\text{F}_3\text{O}_3\text{S}^+$   $[\text{M}+\text{H}]^+$  279.0303, found 279.0308.

To a solution of  $\text{K}_3\text{PO}_4$  (8.48 g, 40 mmol) in water (15 mL) was added 3-pyridylboronic acid (4.92 g, 40 mmol), **S36** (5.56 g, 20 mmol),  $\text{Pd}(\text{PPh}_3)_4$  (1.4 g, 1.2 mmol), and THF (60 mL). The Schlenk tube was evacuated and refilled with nitrogen for three times. Then sealed and put into a preheated oil bath at 100 °C for 2 h. After completion, the reaction mixture was cooled to room temperature. Water (250 mL) was added and the mixture was extracted with EA (150 mL x 3). The combined organic layers were dried with  $\text{Na}_2\text{SO}_4$  and concentrated. The residue was purified by silica gel chromatography eluting with hexane/EA (70/30, v/v) to provide the product **S37** (3.9 g, 94% yield) as pale yellow oil.  $^1\text{H}$  NMR (600 MHz,  $\text{CDCl}_3$ )  $\delta$  8.61 (d,  $J$  = 2.3 Hz, 1H), 8.56 (dd,  $J$  = 4.9, 1.7 Hz, 1H), 7.63 (dt,  $J$  = 7.8, 2.0 Hz, 1H), 7.28 (ddd,  $J$  = 7.8, 4.8, 0.9 Hz, 1H), 7.22 – 7.18 (m, 1H), 7.17 (td,  $J$  = 7.3, 1.4 Hz, 1H), 7.11 (td,  $J$  = 7.5, 1.6 Hz, 1H), 6.91 (d,  $J$  = 7.7 Hz, 1H), 6.12 (t,  $J$  = 4.7 Hz, 1H), 2.88 – 2.83 (m, 2H), 2.42 (td,  $J$  = 8.0, 4.7 Hz, 2H).  $^{13}\text{C}$  NMR (151 MHz,  $\text{CDCl}_3$ )  $\delta$  149.67, 148.39, 136.67, 136.61, 136.29, 136.05, 134.29, 129.27, 127.77,

127.41, 126.39, 124.92, 123.02, 28.04, 23.47. HRMS (ESI-TOF)  $m/z$  Calcd for  $C_{15}H_{14}N^+$   $[M+H]^+$  208.1126, found 208.1126.

**S38** was synthesized according to modified literature procedures:<sup>7</sup> To a solution of **S37** (1.51 g, 7.3 mmol) in DCM (50 mL) at 0 °C was sequentially added  $NaHCO_3$  (1.84 g, 21.9 mmol) and *m*CPBA (21.9 mmol). The reaction mixture was stirred at 0 °C for 2 h. Then  $Na_2S_2O_3$  solid and 10% aqueous NaOH solution (100 mL) were sequentially added and the solution was extracted with DCM (50 mL x 3). The organic phase was washed with brine, dried with  $Na_2SO_4$ , and concentrated. The residue was redissolved in 50 mL of DCM/Et<sub>2</sub>O (50/50, v/v) and  $BF_3 \cdot Et_2O$  (18.3 mmol) was added. The solution was stirred at r.t. for 15 min and evaporated in the fume hood. Then 10% aqueous NaOH solution (100 mL) was added and the solution was extracted with EA (50 mL x 3). The organic phase was washed with brine, dried with  $Na_2SO_4$ , and concentrated. The residue was purified by silica gel chromatography eluting with hexane/EA (65/35, v/v) to provide the product **S38** (260 mg, 16% yield) as pale yellow oil. [Note: **S38** is easy to be oxidized in the air and quickly used for next step]

Following the procedure for synthesis of **S31** with 1.1 mmol of **S38**. The crude product **S39** was obtained and used in the next step without further purification.

#### Synthesis of **S40**

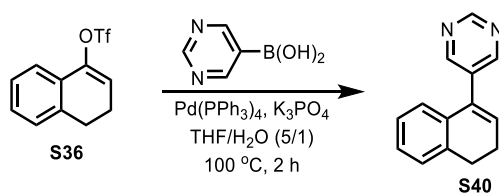

Following the procedure for synthesis of **S37** with 3 mmol of **S36**, purification by silica gel chromatography eluting with hexane/EA (70/30, v/v) afforded product **S40** (593 mg, 95% yield) as pale yellow oil. <sup>1</sup>H NMR (600 MHz,  $CDCl_3$ )  $\delta$  9.19 (s, 1H), 8.73 (s, 2H), 7.24 – 7.20 (m, 2H), 7.15 (td,  $J = 7.6, 2.0$  Hz, 1H), 6.89 (d,  $J = 7.6$  Hz, 1H), 6.18 (t,  $J = 4.7$  Hz, 1H), 2.89 (t,  $J = 8.0$  Hz, 2H), 2.49 – 2.45 (m, 2H). <sup>13</sup>C NMR (151 MHz,  $CDCl_3$ )  $\delta$  157.53, 156.46, 136.52, 134.20, 133.64, 133.45, 130.96, 128.05, 127.93, 126.64, 124.51, 27.86, 23.50. HRMS (ESI-TOF)  $m/z$  Calcd for  $C_{14}H_{13}N_2^+$   $[M+H]^+$  209.1079, found 209.1082.

Optimized route for synthesis of *cis*-**T25**<sup>8</sup>

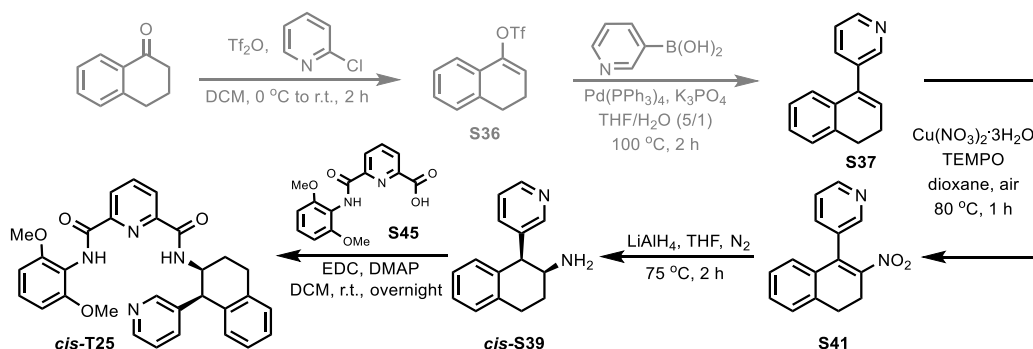

To a solution of **S37** (3.1 g, 15 mmol) in dioxane (150 mL) was sequentially added  $\text{Cu}(\text{NO}_3)_2 \cdot 3\text{H}_2\text{O}$  (7.26 g, 30 mmol) and TEMPO (937 mg, 6 mmol). The flask was kept open and the reaction mixture was stirred at 80 °C for 1 h. After filtering off the precipitate, 10% aqueous NaOH solution (200 mL) was added into the filtrate and the solution was extracted with EA (100 mL x 3). The organic phase was washed with brine, dried with  $\text{Na}_2\text{SO}_4$ , and concentrated. The residue was purified by silica gel chromatography eluting with hexane/EA (70/30, v/v) to provide the product **S41** (1.7 g, 45% yield) as a yellow solid. <sup>1</sup>H NMR (600 MHz,  $\text{CDCl}_3$ )  $\delta$  8.69 (s, 1H), 8.46 (s, 1H), 7.55 (dt,  $J = 7.8, 1.9$  Hz, 1H), 7.40 (dd,  $J = 7.8, 4.8$  Hz, 1H), 7.32 (td,  $J = 7.4, 1.3$  Hz, 1H), 7.28 (d,  $J = 6.9$  Hz, 1H), 7.15 (td,  $J = 7.7, 1.2$  Hz, 1H), 6.73 – 6.70 (m, 1H), 3.14 – 3.07 (m, 4H). <sup>13</sup>C NMR (151 MHz,  $\text{CDCl}_3$ )  $\delta$  149.50, 148.77, 146.87, 136.16, 136.04, 135.99, 132.99, 130.49, 128.98, 127.96, 127.20, 123.42, 28.15, 25.81. HRMS (ESI-TOF)  $m/z$  Calcd for  $\text{C}_{15}\text{H}_{13}\text{N}_2\text{O}_2^+$   $[\text{M}+\text{H}]^+$  253.0977, found 253.0983.

To a solution of LAH (24 mmol) in THF (60 mL) at 0 °C was slowly added a solution of **S41** (1.5 g, 6 mmol) in THF (40 mL) under  $\text{N}_2$  protection. After warming to the room temperature, the flask was put into a preheated oil bath at 75 °C for 2 h. Upon completion, 1 mL of water, 1 mL of 15% aqueous NaOH solution, 3 mL of water, and  $\text{Na}_2\text{SO}_4$  solid were sequentially added. Then, the reaction mixture was filtered. Water (300 mL) was added and the solution was extracted with EA (100 mL x 3). The organic phase was washed with brine, dried with  $\text{Na}_2\text{SO}_4$ , and concentrated to afford the crude product *cis*-**S39** as brown oil, which was used in the next step without further purification.

To a solution of **S45** (1.8 g, 6 mmol), *cis*-**S39** (1.12 g, 5 mmol), and DMAP (61 mg, 0.5 mmol) in DCM (50 mL) at 0 °C was added EDC (1.44 g, 7.5 mmol). The solution was warmed to room

temperature and stirred for overnight. The reaction mixture was evaporated and purified by silica gel chromatography eluting with EA to provide the product *cis*-**T25** (509 mg, 17% yield) as a white solid. If necessary, MeOH can be used to further recrystallization.

### Synthesis of **S44**

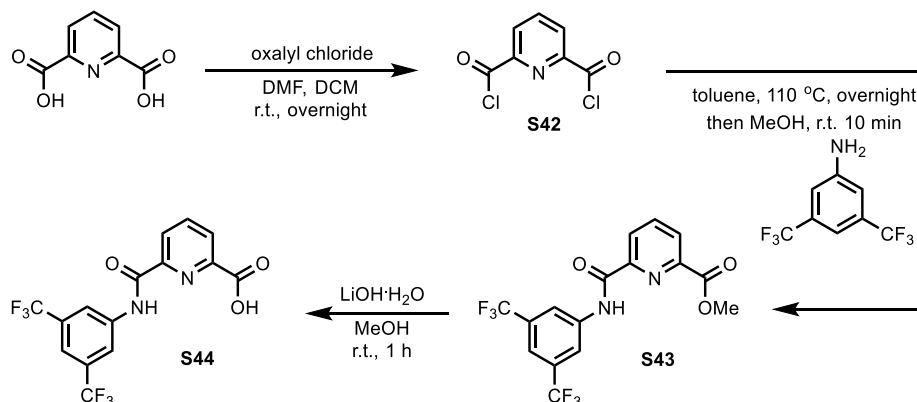

To a stirred solution of 2,6-pyridinedicarboxylic acid (6.68 g, 40 mmol) in DCM (100 mL) at 0 °C was added DMF (40  $\mu$ L) and oxalyl chloride (7.8 mL, 92 mmol). The reaction solution was warmed to room temperature and stirred for overnight. The mixture was concentrated to obtain the crude product **S42**, which was then dissolved in toluene (100 mL). 3,5-Bis(trifluoromethyl)aniline (4.4 mL, 28 mmol) was added to the solution at room temperature. The reaction mixture was put into a preheated oil bath at 110 °C for overnight. Upon completion, MeOH (10 mL) was added to quench the reaction. The solvent was removed. The recrystallization from MeOH afforded the product **S43** (14.6 g, 93% yield) as a white solid. <sup>1</sup>H NMR (600 MHz, CDCl<sub>3</sub>)  $\delta$  10.37 (s, 1H), 8.50 (d,  $J$  = 8.9 Hz, 1H), 8.35 (s, 2H), 8.32 (s, 1H), 8.12 (t,  $J$  = 7.8 Hz, 1H), 7.67 (s, 1H), 4.08 (s, 3H). <sup>13</sup>C NMR (151 MHz, CDCl<sub>3</sub>)  $\delta$  164.64, 161.75, 149.14, 146.65, 139.24, 138.97, 132.46 (q,  $J$  = 33.7 Hz), 128.10 (d,  $J$  = 6.5 Hz), 125.81, 123.15 (q,  $J$  = 273.0 Hz), 119.77 (q,  $J$  = 4.3 Hz), 118.59 – 116.89 (m), 53.18. <sup>19</sup>F NMR (376 MHz, CDCl<sub>3</sub>)  $\delta$  -65.63. HRMS (ESI-TOF)  $m/z$  Calcd for C<sub>16</sub>H<sub>11</sub>F<sub>6</sub>N<sub>2</sub>O<sub>3</sub><sup>+</sup> [M+H]<sup>+</sup> 393.0674, found 393.0672.

To a solution of **S43** (14.6 g, 37.3 mmol) in MeOH (100 mL) was added LiOH·H<sub>2</sub>O (6.3 g, 149.2 mmol). The resulting mixture was stirred at room temperature for 1 h. The mixture was acidified with 2N HCl solution (500 mL) and extracted with EA (300 mL x 3). The combined organic layers were dried with Na<sub>2</sub>SO<sub>4</sub> and concentrated to give the product **S44** (10 g, 71% yield) as a

white solid.  $^1\text{H}$  NMR (600 MHz,  $\text{CD}_3\text{OD}$ )  $\delta$  8.61 (s, 2H), 8.31 (dd,  $J = 7.7, 1.6$  Hz, 2H), 8.10 (t,  $J = 7.7$  Hz, 1H), 7.69 (s, 1H).  $^{13}\text{C}$  NMR (151 MHz,  $\text{CD}_3\text{OD}$ )  $\delta$  169.56, 163.35, 152.59, 147.89, 140.27, 137.87, 131.40 (q,  $J = 33.2$  Hz), 126.55, 122.95, 122.51 (q,  $J = 271.8$  Hz), 118.94 (dd,  $J = 8.9, 3.4$  Hz), 116.28 – 115.01 (m).  $^{19}\text{F}$  NMR (376 MHz,  $\text{CD}_3\text{OD}$ )  $\delta$  -63.26. HRMS (ESI-TOF)  $m/z$  Calcd for  $\text{C}_{15}\text{H}_9\text{F}_6\text{N}_2\text{O}_3^+ [\text{M}+\text{H}]^+$  379.0517, found 379.0518.

### Synthesis of **S48**, **T1-7**, **T18-28**, **TC11-12**

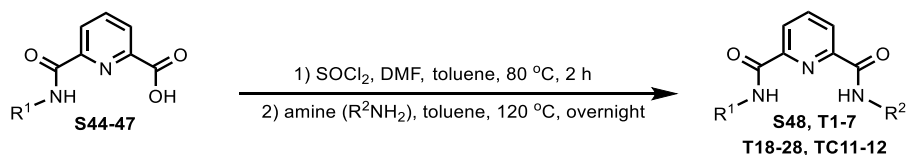

To a solution of **S44-47** (1 mmol) in dry toluene (20 mL) was added DMF (3 drops) and thionyl chloride (181  $\mu\text{L}$ , 2.5 mmol) under nitrogen protection. The reaction mixture was stirred at 80  $^\circ\text{C}$  for 2 h. After completion, the mixture was concentrated and redissolved in dry toluene (20 mL). Amine (1 mmol) was added, and the reaction solution was stirred at 120  $^\circ\text{C}$  for overnight. The mixture was concentrated and purified by silica gel chromatography eluting with hexane/EA to provide the corresponding product **S48**, **T1-7**, **T18-28**, **TC11-12**.

### Synthesis of **T8-12**, **T16**

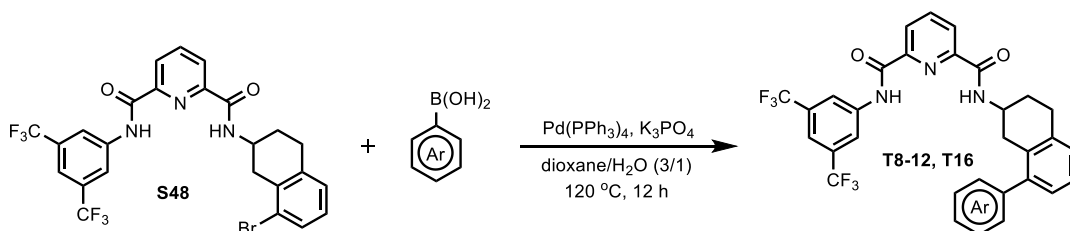

To a solution of  $\text{K}_3\text{PO}_4$  (127 mg, 0.6 mmol) in water (1 mL) was added **S48** (176 mg, 0.3 mmol), arylboronic acid (0.6 mmol),  $\text{Pd}(\text{PPh}_3)_4$  (35 mg, 0.03 mmol), and dioxane (3 mL). The Schlenk tube was evacuated and refilled with nitrogen for three times. The reaction solution was stirred at 120  $^\circ\text{C}$  for 12 h. After completion, the reaction mixture was cooled to room temperature. Water (100 mL) was added and the mixture was extracted with EA (50 mL x 3). The combined organic layers were dried with  $\text{Na}_2\text{SO}_4$  and concentrated. The residue was purified by silica gel chromatography eluting with hexane/EA to provide the product **T8-12**, **T16**.

### Synthesis of **T13-15**

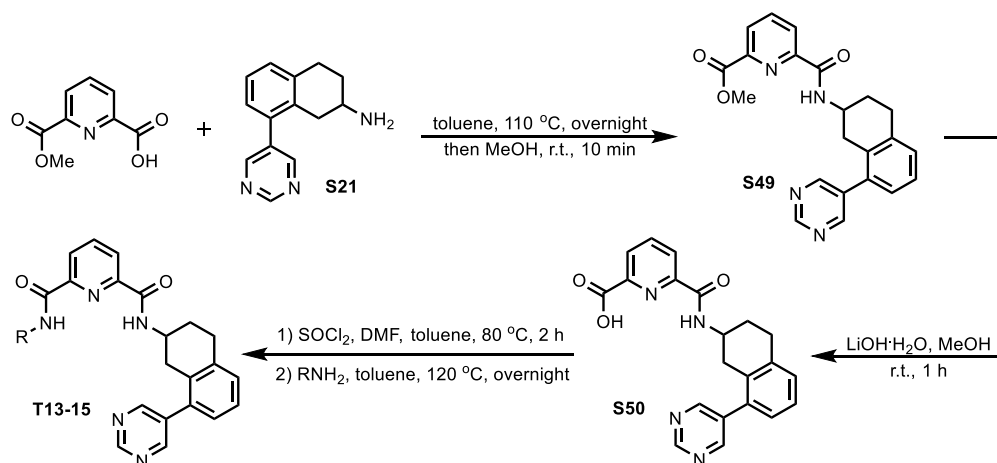

To a solution of 2,6-Pyridinedicarboxylic acid monomethyl ester (592 mg, 2.9 mmol) in toluene (40 mL) was added amine **S21** (484 mg, 2 mmol) under nitrogen protection. The reaction mixture was stirred at 110 °C for overnight. Upon completion, MeOH (2 mL) was added to quench the reaction. The solvent was removed. The recrystallization from MeOH afforded the product **S49** (621 mg, 80% yield) as a white solid. <sup>1</sup>H NMR (600 MHz, CDCl<sub>3</sub>) δ 9.19 (s, 1H), 8.72 (s, 2H), 8.36 (dd, *J* = 7.8, 1.1 Hz, 1H), 8.21 (dd, *J* = 7.8, 1.1 Hz, 1H), 8.10 (d, *J* = 8.4 Hz, 1H), 8.00 (t, *J* = 7.8 Hz, 1H), 7.31 – 7.26 (m, 2H), 7.06 (dd, *J* = 7.2, 1.7 Hz, 1H), 4.42 – 4.36 (m, 1H), 4.01 (s, 3H), 3.12 – 3.07 (m, 2H), 2.97 (dd, *J* = 16.2, 4.4 Hz, 1H), 2.73 (dd, *J* = 16.2, 10.0 Hz, 1H), 2.29 – 2.26 (m, 1H), 1.98 – 1.90 (m, 1H). <sup>13</sup>C NMR (151 MHz, CDCl<sub>3</sub>) δ 164.94, 162.87, 157.41, 156.63, 150.07, 146.52, 138.57, 136.76, 135.02, 134.79, 132.48, 129.79, 127.83, 127.32, 126.51, 125.46, 52.95, 46.08, 34.63, 28.96, 28.80. HRMS (ESI-TOF) *m/z* Calcd for C<sub>22</sub>H<sub>21</sub>N<sub>4</sub>O<sub>3</sub><sup>+</sup> [M+H]<sup>+</sup> 389.1614, found 389.1615.

To a solution of **S49** (608 mg, 1.5 mmol) in MeOH (10 mL) was added LiOH·H<sub>2</sub>O (252 mg, 6 mmol). The resulting mixture was stirred at room temperature for 1 h. The mixture was acidified with 2N HCl solution (50 mL) and extracted with EA (50 mL x 3). The combined organic layers were dried with Na<sub>2</sub>SO<sub>4</sub> and concentrated to give the product **S50** (477 mg, 85% yield) as colorless oil. <sup>1</sup>H NMR (600 MHz, CDCl<sub>3</sub>) δ 9.23 (s, 1H), 8.80 (s, 2H), 8.38 (d, *J* = 7.7 Hz, 1H), 8.30 (d, *J* = 7.6 Hz, 1H), 8.21 (d, *J* = 8.6 Hz, 1H), 8.03 (t, *J* = 7.8 Hz, 1H), 7.28 (t, *J* = 7.5 Hz, 1H), 7.25 (d, *J* = 6.8 Hz, 1H), 7.06 (d, *J* = 6.6 Hz, 1H), 4.41 (t, *J* = 10.1 Hz, 1H), 3.12 – 3.04 (m, 2H), 2.89 (dd, *J* = 16.0, 5.1 Hz, 1H), 2.77 (dd, *J* = 16.2, 10.4 Hz, 1H), 2.23 (dd, *J* = 12.1, 3.4 Hz, 1H), 1.95 – 1.88 (m, 1H). <sup>13</sup>C NMR (151 MHz, CDCl<sub>3</sub>) δ 165.38, 162.74, 160.36, 156.61, 156.57,

149.78, 139.12, 136.74, 135.32, 134.25, 132.46, 129.99, 127.76, 127.20, 126.62, 126.07, 46.20, 34.77, 29.06, 29.02. HRMS (ESI-TOF)  $m/z$  Calcd for  $C_{21}H_{18}N_4O_3^+$   $[M+H]^+$  375.1457, found 375.1455.

To a solution of **S50** (235 mg, 0.6 mmol) in dry toluene (10 mL) was added DMF (3 drops) and thionyl chloride (109  $\mu$ L, 1.5 mmol) under nitrogen protection. The reaction mixture was stirred at 80 °C for 2 h. After completion, the mixture was concentrated and redissolved in dry toluene (10 mL). Amine (0.6 mmol) was added and the reaction solution was stirred at 120 °C for overnight. The mixture was concentrated and purified by silica gel chromatography eluting with hexane/EA to provide the corresponding product **T13-15**.

### Synthesis of **T17**

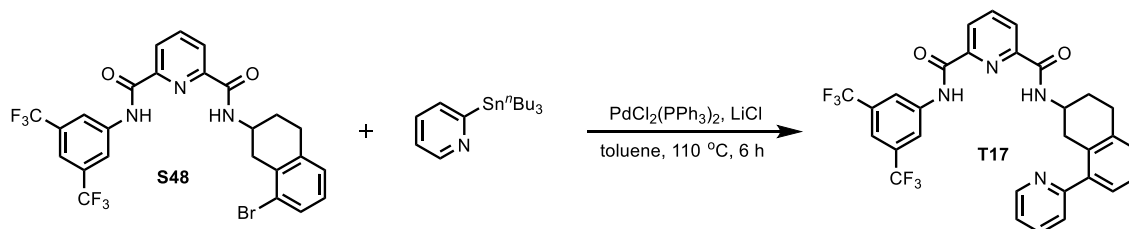

To a solution of **S48** (117 mg, 0.2 mmol),  $PdCl_2(PPh_3)_2$  (9.8 mg, 0.014 mmol), LiCl (48 mg, 1.14 mmol) in toluene (10 mL) was added 2-(tributylstannyl)pyridine (96  $\mu$ L, 0.3 mmol). The Schlenk tube was evacuated and refilled with nitrogen for three times. The reaction solution was stirred at 110 °C for 6 h. Saturated KF solution (50 mL) was added and the mixture was stirred for 30 min. After filtration, saturated  $NaHCO_3$  solution (100 mL) was added and the mixture was extracted with EA (50 mL x 3). The combined organic layers were dried with  $Na_2SO_4$  and concentrated. The residue was purified by silica gel chromatography eluting with hexane/EA to provide the product **T17**.

### Synthesis of **TC1-10**

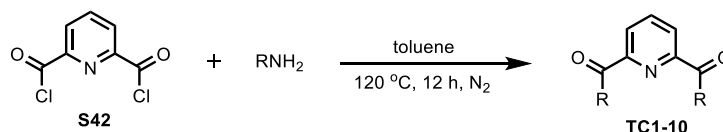

To a stirred solution of 2,6-pyridinedicarbonyl dichloride (255 mg, 1.25 mmol) in toluene (10 mL) was added amine (2.75 mmol). The reaction solution was stirred at 120 °C for 12 h. Upon completion, the reaction mixture was filtered. The residue was washed with toluene and MeOH

or purified by silica gel chromatography eluting with hexane/EA to afford the corresponding product **TC1-10**.

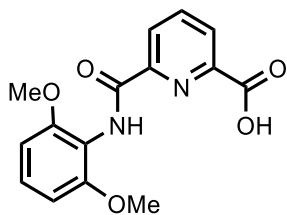

**6-((2,6-Dimethoxyphenyl)carbamoyl)picolinic acid (S45)** Following procedure for synthesis of **S44**, **S45** was obtained as a white solid in 52% yield.  $^1\text{H}$  NMR (600 MHz,  $\text{CD}_3\text{OD}$ )  $\delta$  8.38 (ddd,  $J = 14.2, 7.7, 1.1$  Hz, 2H), 8.21 (t,  $J = 7.8$  Hz, 1H), 7.31 (t,  $J = 8.5$  Hz, 1H), 6.75 (d,  $J = 8.5$  Hz, 2H), 3.83 (s, 6H).  $^{13}\text{C}$  NMR (151 MHz,  $\text{CD}_3\text{OD}$ )  $\delta$  165.67, 162.64, 155.80, 149.41, 146.18, 138.76, 127.87, 126.60, 125.01, 112.75, 103.52, 54.54. HRMS (ESI-TOF)  $m/z$  Calcd for  $\text{C}_{15}\text{H}_{15}\text{N}_2\text{O}_5^+$   $[\text{M}+\text{H}]^+$  303.0981, found 303.0986.

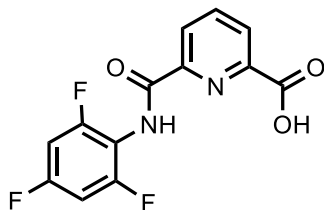

**6-((2,4,6-Trifluorophenyl)carbamoyl)picolinic acid (S46)** Following procedure for synthesis of **S44**, **S46** was obtained as a white solid in 90% yield.  $^1\text{H}$  NMR (600 MHz,  $\text{CD}_3\text{OD}$ )  $\delta$  8.41 (ddd,  $J = 8.6, 7.7, 1.1$  Hz, 2H), 8.24 (t,  $J = 7.8$  Hz, 1H), 7.06 – 7.01 (m, 2H).  $^{13}\text{C}$  NMR (151 MHz,  $\text{CD}_3\text{OD}$ )  $\delta$  165.53, 162.99, 160.09 (t,  $J = 14.9$  Hz), 159.17 (dd,  $J = 15.6, 7.4$  Hz), 157.50 (dd,  $J = 15.5, 7.3$  Hz), 148.40, 146.35, 139.01, 127.21, 125.30, 99.82 (dd,  $J = 29.6, 26.9$  Hz).  $^{19}\text{F}$  NMR (376 MHz,  $\text{CD}_3\text{OD}$ )  $\delta$  -109.39 (t,  $J = 6.1$  Hz), -114.84 (d,  $J = 6.5$  Hz). HRMS (ESI-TOF)  $m/z$  Calcd for  $\text{C}_{13}\text{H}_8\text{F}_3\text{N}_2\text{O}_3^+$   $[\text{M}+\text{H}]^+$  297.0487, found 297.0489.

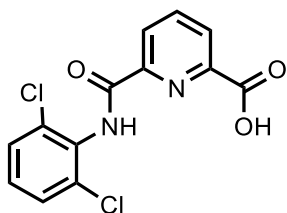



**6-((2,6-Dichlorophenyl)carbamoyl)picolinic acid (S47)** Following procedure for synthesis of **S44**, **S47** was obtained as a white solid in 85% yield. <sup>1</sup>H NMR (600 MHz, CD<sub>3</sub>OD) δ 8.42 (t, *J* = 8.1 Hz, 2H), 8.25 (t, *J* = 7.8 Hz, 1H), 7.54 (d, *J* = 8.2 Hz, 2H), 7.38 (t, *J* = 8.2 Hz, 1H). <sup>13</sup>C NMR (151 MHz, CD<sub>3</sub>OD) δ 165.49, 162.66, 148.54, 146.30, 139.04, 133.83, 131.78, 128.75, 127.87, 127.16, 125.31. HRMS (ESI-TOF) *m/z* Calcd for C<sub>13</sub>H<sub>9</sub>Cl<sub>2</sub>N<sub>2</sub>O<sub>3</sub><sup>+</sup> [M+H]<sup>+</sup> 310.9990, found 310.9997.

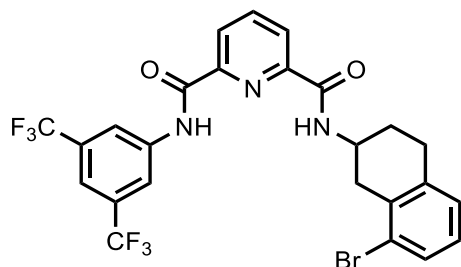

**N<sup>2</sup>-(3,5-Bis(trifluoromethyl)phenyl)-N<sup>6</sup>-(8-bromo-1,2,3,4-tetrahydronaphthalen-2-yl)pyridine-2,6-dicarboxamide (S48)** Purification by silica gel chromatography eluting with hexane/EA (75/25, v/v), white solid, 40% yield. <sup>1</sup>H NMR (600 MHz, CDCl<sub>3</sub>) δ 9.64 (s, 1H), 8.48 (dd, *J* = 7.8, 1.2 Hz, 1H), 8.44 (dd, *J* = 7.8, 1.2 Hz, 1H), 8.18 (s, 2H), 8.12 (t, *J* = 7.8 Hz, 1H), 7.74 (d, *J* = 8.3 Hz, 1H), 7.68 (s, 1H), 7.42 (d, *J* = 7.7 Hz, 1H), 7.10 (d, *J* = 7.5 Hz, 1H), 7.03 (t, *J* = 7.8 Hz, 1H), 4.61 (qdd, *J* = 8.4, 5.5, 3.1 Hz, 1H), 3.26 (dd, *J* = 17.1, 5.6 Hz, 1H), 2.97 (q, *J* = 7.3, 6.1 Hz, 2H), 2.84 (dd, *J* = 17.1, 7.7 Hz, 1H), 2.20 – 2.15 (m, 1H), 2.00 – 1.90 (m, 1H). <sup>13</sup>C NMR (151 MHz, CDCl<sub>3</sub>) δ 162.73, 161.64, 149.19, 147.84, 139.68, 138.64, 137.93, 133.28, 132.56 (q, *J* = 33.7 Hz), 130.41, 128.01, 127.67, 126.23, 125.80, 125.68, 123.05 (q, *J* = 273.0 Hz), 120.02 – 119.53 (m), 118.24 – 117.85 (m), 45.63, 36.34, 28.07, 27.67. <sup>19</sup>F NMR (376 MHz, CDCl<sub>3</sub>) δ -65.52. HRMS (ESI-TOF) *m/z* Calcd for C<sub>25</sub>H<sub>19</sub>BrF<sub>6</sub>N<sub>3</sub>O<sub>2</sub><sup>+</sup> [M+H]<sup>+</sup> 586.0565, found 586.0566.

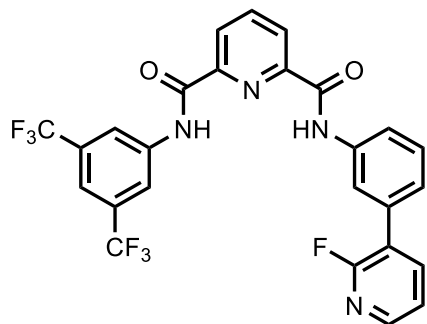

***N*<sup>2</sup>-(3,5-Bis(trifluoromethyl)phenyl)-*N*<sup>6</sup>-(3-(2-fluoropyridin-3-yl)phenyl)pyridine-2,6-dicarboxamide (T1)** Purification by silica gel chromatography eluting with hexane/EA (60/40, v/v), white solid, 72% yield. <sup>1</sup>H NMR (600 MHz, CDCl<sub>3</sub>) δ 9.82 (s, 1H), 9.52 (s, 1H), 8.51 (dd, *J* = 16.6, 7.7 Hz, 2H), 8.31 (s, 2H), 8.21 (d, *J* = 4.8 Hz, 1H), 8.17 (t, *J* = 7.7 Hz, 1H), 7.96 (s, 1H), 7.91 – 7.85 (m, 1H), 7.72 (d, *J* = 8.0 Hz, 1H), 7.69 (s, 1H), 7.48 (t, *J* = 7.8 Hz, 1H), 7.38 (d, *J* = 7.5 Hz, 1H), 7.28 (s, 1H). <sup>13</sup>C NMR (151 MHz, CDCl<sub>3</sub>) δ 161.72, 161.38, 160.26 (d, *J* = 239.5 Hz), 149.14, 148.22, 146.77 (d, *J* = 15.2 Hz), 140.69, 139.96, 138.62, 137.18, 134.97, 132.62 (q, *J* = 33.9 Hz), 129.62, 126.39, 126.12, 125.70, 123.10 (d, *J* = 28.2 Hz), 123.03 (d, *J* = 273.0 Hz), 122.02 – 121.76 (m), 120.99, 120.65, 120.14 (d, *J* = 3.4 Hz), 118.29 (dt, *J* = 7.6, 3.2 Hz). <sup>19</sup>F NMR (376 MHz, CDCl<sub>3</sub>) δ -65.61, -73.59. HRMS (ESI-TOF) *m/z* Calcd for C<sub>26</sub>H<sub>16</sub>F<sub>7</sub>N<sub>4</sub>O<sub>2</sub><sup>+</sup> [M+H]<sup>+</sup> 549.1161, found 549.1167.

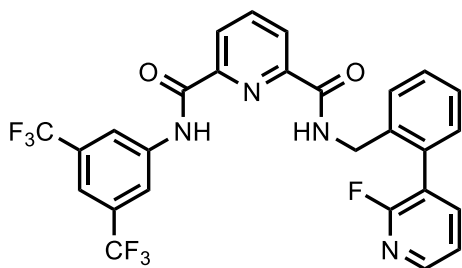

***N*<sup>2</sup>-(3,5-Bis(trifluoromethyl)phenyl)-*N*<sup>6</sup>-(2-(2-fluoropyridin-3-yl)benzyl)pyridine-2,6-dicarboxamide (T2)** Purification by silica gel chromatography eluting with hexane/EA (65/35, v/v), white solid, 50% yield. <sup>1</sup>H NMR (600 MHz, CDCl<sub>3</sub>) δ 9.90 (s, 1H), 8.54 (s, 2H), 8.46 (dd, *J* = 7.8, 1.2 Hz, 1H), 8.42 (dd, *J* = 7.8, 1.2 Hz, 1H), 8.27 (ddd, *J* = 4.9, 2.0, 1.2 Hz, 1H), 8.24 (q, *J* = 5.0 Hz, 1H), 8.12 (t, *J* = 7.8 Hz, 1H), 7.82 (ddd, *J* = 10.1, 7.3, 2.0 Hz, 1H), 7.67 (s, 1H), 7.65 (dd, *J* = 7.7, 1.4 Hz, 1H), 7.48 (td, *J* = 7.5, 1.6 Hz, 1H), 7.45 (td, *J* = 7.5, 1.6 Hz, 1H), 7.38 (ddd, *J* = 7.2, 4.9, 2.1 Hz, 1H), 7.30 (dd, *J* = 7.5, 1.5 Hz, 1H), 4.94 (s, 1H), 4.14 (s, 1H). <sup>13</sup>C NMR (151 MHz, CDCl<sub>3</sub>) δ 162.60, 161.81, 160.44 (d, *J* = 230.2 Hz), 148.99, 148.07, 147.40 (d, *J* = 15.4 Hz), 142.23 (d, *J* = 4.8 Hz), 139.55, 138.98, 136.21, 133.44 (d, *J* = 3.7 Hz), 132.38 (q, *J* = 33.5 Hz), 130.62, 130.54, 129.72, 128.52, 125.92, 125.61, 123.20 (q, *J* = 273.2 Hz), 122.90 (d, *J* = 33.8 Hz), 122.43 (d, *J* = 4.1 Hz), 120.64 – 119.49 (m), 117.89 (d, *J* = 4.5 Hz), 41.75. <sup>19</sup>F NMR (376 MHz, CDCl<sub>3</sub>) δ -65.52, -71.88. HRMS (ESI-TOF) *m/z* Calcd for C<sub>27</sub>H<sub>18</sub>F<sub>7</sub>N<sub>4</sub>O<sub>2</sub><sup>+</sup> [M+H]<sup>+</sup> 563.1318, found 563.1320.

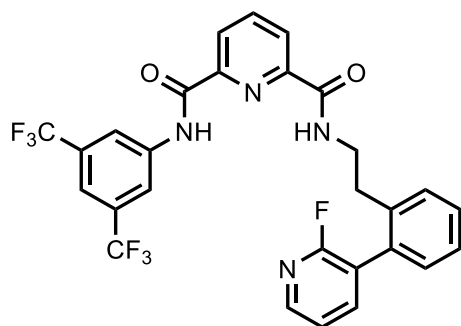

***N*<sup>2</sup>-(3,5-Bis(trifluoromethyl)phenyl)-*N*<sup>6</sup>-(2-(2-fluoropyridin-3-yl)phenethyl)pyridine-2,6-**

**dicarboxamide (T3)** Purification by silica gel chromatography eluting with hexane/EA (65/35, v/v), colorless oil, 71% yield. <sup>1</sup>H NMR (600 MHz, CDCl<sub>3</sub>) δ 9.78 (s, 1H), 8.45 (dd, *J* = 7.8, 1.2 Hz, 1H), 8.40 (dd, *J* = 7.8, 1.2 Hz, 1H), 8.27 (s, 2H), 8.17 (ddd, *J* = 4.9, 2.0, 1.0 Hz, 1H), 8.10 (t, *J* = 7.8 Hz, 1H), 7.80 (t, *J* = 5.8 Hz, 1H), 7.71 (ddd, *J* = 9.6, 7.3, 2.0 Hz, 1H), 7.66 (s, 1H), 7.42 (dd, *J* = 7.8, 1.4 Hz, 1H), 7.40 – 7.35 (m, 1H), 7.32 – 7.27 (m, 2H), 7.23 (dd, *J* = 7.6, 1.4 Hz, 1H), 3.72 (q, *J* = 6.5 Hz, 2H), 2.86 (t, *J* = 6.9 Hz, 2H). <sup>13</sup>C NMR (151 MHz, CDCl<sub>3</sub>) δ 163.26, 161.99, 160.18 (d, *J* = 234.4 Hz), 149.04, 148.03, 147.05 (d, *J* = 14.7 Hz), 142.31 (d, *J* = 4.6 Hz), 139.45, 138.83, 137.02, 133.89 (d, *J* = 3.8 Hz), 132.33 (q, *J* = 33.6 Hz), 130.54, 129.35, 129.14, 127.05, 126.02, 125.66, 123.43 (d, *J* = 32.5 Hz), 123.13 (q, *J* = 273 Hz), 121.95 (d, *J* = 4.4 Hz), 120.50 – 119.97 (m), 117.95 (d, *J* = 4.0 Hz), 39.61, 32.25. <sup>19</sup>F NMR (376 MHz, CDCl<sub>3</sub>) δ -65.51, -71.84. HRMS (ESI-TOF) *m/z* Calcd for C<sub>28</sub>H<sub>20</sub>F<sub>7</sub>N<sub>4</sub>O<sub>2</sub><sup>+</sup> [M+H]<sup>+</sup> 577.1474, found 577.1477.

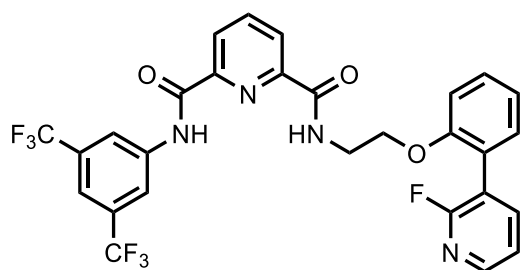

***N*<sup>2</sup>-(3,5-Bis(trifluoromethyl)phenyl)-*N*<sup>6</sup>-(2-(2-(2-fluoropyridin-3-yl)phenoxy)ethyl)pyridine-**

**2,6-dicarboxamide (T4)** Purification by silica gel chromatography eluting with hexane/EA (70/30, v/v), colorless oil, 56% yield. <sup>1</sup>H NMR (600 MHz, CDCl<sub>3</sub>) δ 10.20 (s, 1H), 8.50 (ddd, *J* = 10.2, 7.8, 1.2 Hz, 2H), 8.30 (s, 3H), 8.12 (t, *J* = 7.8 Hz, 1H), 7.99 – 7.95 (m, 1H), 7.77 (ddd, *J* = 9.5, 7.3, 2.0 Hz, 1H), 7.60 (s, 1H), 7.42 (ddd, *J* = 8.2, 7.5, 1.7 Hz, 1H), 7.30 (dd, *J* = 7.5, 1.7 Hz, 1H), 7.25 (dd, *J* = 4.9, 2.3 Hz, 1H), 7.10 (td, *J* = 7.5, 1.0 Hz, 1H), 6.99 (d, *J* = 7.9 Hz, 1H), 4.30

– 4.23 (m, 2H), 3.91 (q,  $J = 5.4$  Hz, 2H).  $^{13}\text{C}$  NMR (151 MHz,  $\text{CDCl}_3$ )  $\delta$  163.67, 162.51, 160.54 (d,  $J = 234.9$  Hz), 155.25, 149.23, 148.70, 146.14 (d,  $J = 15.3$  Hz), 142.17 (d,  $J = 5.6$  Hz), 139.13, 138.99, 131.95 (q,  $J = 33.5$  Hz), 130.85, 130.54, 126.29, 126.01, 123.30 (d,  $J = 4.5$  Hz), 123.12 (q,  $J = 272.4$  Hz), 122.17 (d,  $J = 4.1$  Hz), 121.56, 121.51 – 121.29 (m), 121.17, 118.06 – 117.62 (m), 111.40, 67.25, 39.43.  $^{19}\text{F}$  NMR (376 MHz,  $\text{CDCl}_3$ )  $\delta$  -65.63, -69.15. HRMS (ESI-TOF)  $m/z$  Calcd for  $\text{C}_{28}\text{H}_{20}\text{F}_7\text{N}_4\text{O}_3^+$   $[\text{M}+\text{H}]^+$  593.1424, found 593.1435.

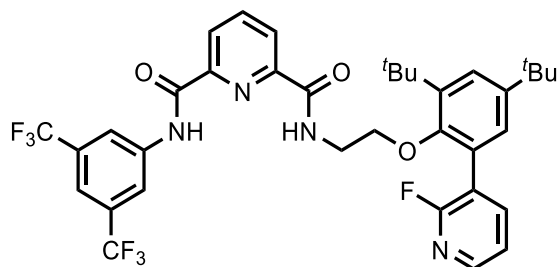

***N*<sup>2</sup>-(3,5-Bis(trifluoromethyl)phenyl)-*N*<sup>6</sup>-(2-(2,4-di-*tert*-butyl-6-(2-fluoropyridin-3-**

**yl)phenoxy)ethyl)pyridine-2,6-dicarboxamide (T5)** Purification by silica gel chromatography eluting with hexane/EA (70/30, v/v), white solid, 36% yield.  $^1\text{H}$  NMR (600 MHz,  $\text{CDCl}_3$ )  $\delta$  10.79 (s, 1H), 8.46 (dd,  $J = 7.8, 1.2$  Hz, 1H), 8.41 (s, 2H), 8.38 (dd,  $J = 7.8, 1.2$  Hz, 1H), 8.12 (t,  $J = 7.8$  Hz, 1H), 8.04 (t,  $J = 6.0$  Hz, 1H), 7.87 (ddd,  $J = 9.3, 7.3, 2.0$  Hz, 1H), 7.67 (dd,  $J = 4.9, 1.9$  Hz, 1H), 7.60 (s, 1H), 7.49 (d,  $J = 2.5$  Hz, 1H), 7.17 (ddd,  $J = 7.0, 4.9, 1.7$  Hz, 1H), 7.11 – 7.08 (m, 1H), 3.62 (s, 4H), 1.46 (s, 9H), 1.34 (s, 9H).  $^{13}\text{C}$  NMR (151 MHz,  $\text{CDCl}_3$ )  $\delta$  163.22, 163.03, 160.52 (d,  $J = 239.3$  Hz), 153.05, 149.11, 148.94, 146.94, 145.77 (d,  $J = 14.1$  Hz), 142.36, 141.71 (d,  $J = 5.3$  Hz), 139.46, 139.11, 132.86 – 130.97 (m), 127.60 (d,  $J = 4.8$  Hz), 126.28, 125.84 – 125.68 (m), 123.13 (q,  $J = 272.9$  Hz), 123.08 (d,  $J = 31.7$  Hz), 122.07 (d,  $J = 4.7$  Hz), 120.96 – 119.74 (m), 117.96 – 117.13 (m), 72.40, 39.42, 35.41, 34.68, 31.45, 31.03.  $^{19}\text{F}$  NMR (376 MHz,  $\text{CDCl}_3$ )  $\delta$  -65.69, -71.14. HRMS (ESI-TOF)  $m/z$  Calcd for  $\text{C}_{36}\text{H}_{36}\text{F}_7\text{N}_4\text{O}_3^+$   $[\text{M}+\text{H}]^+$  705.2676, found 705.2672.

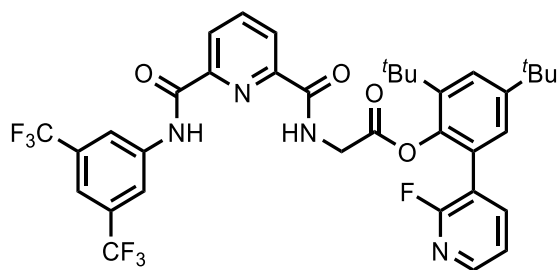

**2,4-Di-tert-butyl-6-(2-fluoropyridin-3-yl)phenyl****(6-((3,5-**

**bis(trifluoromethyl)phenyl)carbamoyl)picolinoyl)glycinate (T6)** Purification by silica gel chromatography eluting with hexane/EA (65/35, v/v), white solid, 78% yield. <sup>1</sup>H NMR (600 MHz, CDCl<sub>3</sub>) δ 10.25 (s, 1H), 8.51 (dd, *J* = 7.8, 1.2 Hz, 1H), 8.46 (d, *J* = 8.1 Hz, 3H), 8.21 (d, *J* = 3.7 Hz, 1H), 8.17 – 8.08 (m, 2H), 7.84 (ddd, *J* = 9.5, 7.3, 2.0 Hz, 1H), 7.64 (s, 1H), 7.53 (d, *J* = 2.3 Hz, 1H), 7.34 (t, *J* = 5.6 Hz, 1H), 7.22 (d, *J* = 2.4 Hz, 1H), 4.50 (s, 1H), 3.79 (s, 1H), 1.35 (d, *J* = 4.0 Hz, 18H). <sup>13</sup>C NMR (151 MHz, CDCl<sub>3</sub>) δ 167.61, 163.17, 161.97, 149.47, 148.35 (d, *J* = 8.4 Hz), 146.93 (d, *J* = 14.1 Hz), 144.42, 141.36, 139.57, 139.04, 132.28 (q, *J* = 33.5 Hz), 127.54 (d, *J* = 4.5 Hz), 126.06 (d, *J* = 2.3 Hz), 125.73, 125.61, 123.14 (q, *J* = 273.2 Hz), 120.60 (dd, *J* = 6.0, 3.0 Hz), 118.17 – 117.45 (m), 41.59, 34.99, 34.88, 31.40, 30.43. <sup>19</sup>F NMR (376 MHz, CDCl<sub>3</sub>) δ -65.57, -70.69. HRMS (ESI-TOF) *m/z* Calcd for C<sub>36</sub>H<sub>34</sub>F<sub>7</sub>N<sub>4</sub>O<sub>4</sub><sup>+</sup> [M+H]<sup>+</sup> 719.2468, found 719.2464.

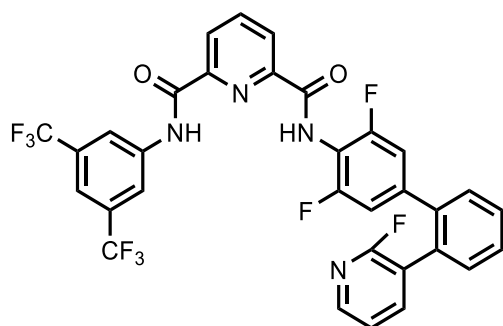***N*<sup>2</sup>-(3,5-Bis(trifluoromethyl)phenyl)-*N*<sup>6</sup>-(3,5-difluoro-2'-(2-fluoropyridin-3-yl)-[1,1'-**

**biphenyl]-4-yl)pyridine-2,6-dicarboxamide (T7)** Purification by silica gel chromatography eluting with hexane/EA (60/40, v/v), white solid, 52% yield. <sup>1</sup>H NMR (600 MHz, CDCl<sub>3</sub>) δ 10.22 (s, 1H), 9.43 (s, 1H), 8.54 (ddd, *J* = 15.3, 7.8, 1.1 Hz, 2H), 8.26 (s, 2H), 8.18 (t, *J* = 7.8 Hz, 1H), 8.13 (dt, *J* = 4.1, 1.2 Hz, 1H), 7.73 (ddd, *J* = 9.4, 7.4, 2.0 Hz, 1H), 7.61 (s, 1H), 7.52 – 7.48 (m, 2H), 7.40 – 7.37 (m, 1H), 7.36 – 7.31 (m, 1H), 7.24 (ddd, *J* = 7.4, 4.9, 1.6 Hz, 1H), 6.64 (d, *J* = 8.5 Hz, 2H). <sup>13</sup>C NMR (151 MHz, CDCl<sub>3</sub>) δ 162.04, 162.02, 159.88 (d, *J* = 240.4 Hz), 158.11 (d, *J* = 6.1 Hz), 156.44 (d, *J* = 5.8 Hz), 148.21, 148.06, 146.85 (d, *J* = 14.0 Hz), 142.25 (d, *J* = 4.9 Hz), 141.90 – 141.52 (m), 139.68, 138.98 – 138.82 (m), 138.78, 132.32 (q, *J* = 33.5 Hz), 132.26 (d, *J* = 4.8 Hz), 131.11, 129.95, 129.27, 128.73, 126.52, 126.26, 123.45 (d, *J* = 30.8 Hz), 123.02 (q, *J* = 273.0 Hz), 121.82 (d, *J* = 5.0 Hz), 120.66 – 119.85 (m), 118.02 (dd, *J* = 8.6, 4.0

Hz), 112.79 – 112.49 (m).  $^{19}\text{F}$  NMR (376 MHz,  $\text{CDCl}_3$ )  $\delta$  -65.65, -70.66, -119.25. HRMS (ESI-TOF)  $m/z$ . Calcd for  $\text{C}_{32}\text{H}_{18}\text{F}_9\text{N}_4\text{O}_2^+$   $[\text{M}+\text{H}]^+$  661.1286, found 661.1291.

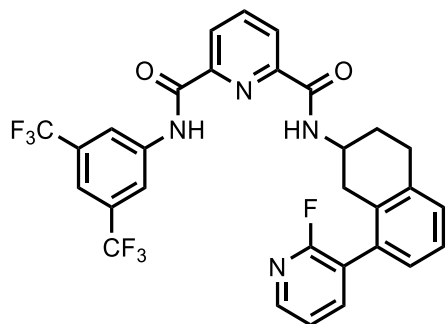

***N*<sup>2</sup>-(3,5-Bis(trifluoromethyl)phenyl)-*N*<sup>6</sup>-(8-(2-fluoropyridin-3-yl)-1,2,3,4-**

**tetrahydronaphthalen-2-yl)pyridine-2,6-dicarboxamide (T8)** Purification by silica gel chromatography eluting with hexane/EA (65/35, v/v), white solid, 57% yield.  $^1\text{H}$  NMR (600 MHz,  $\text{CDCl}_3$ )  $\delta$  9.68 (s, 1H), 8.43 (td,  $J = 7.7, 1.2$  Hz, 2H), 8.20 (d,  $J = 4.2$  Hz, 1H), 8.15 (s, 2H), 8.09 (t,  $J = 7.8$  Hz, 1H), 7.79 (d,  $J = 59.2$  Hz, 2H), 7.63 (s, 1H), 7.29 (d,  $J = 15.4$  Hz, 1H), 7.25 (s, 1H), 7.22 (s, 1H), 7.08 (d,  $J = 8.8$  Hz, 1H), 4.56 (h,  $J = 5.9$  Hz, 1H), 2.97 (m, 2H), 2.74 (m, 2H), 2.13 (m, 2H).  $^{13}\text{C}$  NMR (151 MHz,  $\text{CDCl}_3$ )  $\delta$  163.01, 162.02, 160.09 (d,  $J = 234.4$  Hz), 148.93, 148.09, 146.87 (d,  $J = 14.5$  Hz), 142.12, 139.43, 138.89, 136.07, 134.10, 132.29, 132.20 (q,  $J = 33.3$  Hz), 129.50, 127.82, 126.47, 125.96, 125.61, 123.43 (d,  $J = 32.3$  Hz), 123.08 (q,  $J = 272.9$  Hz), 122.07, 120.35 – 120.21 (m), 117.96 – 117.77 (m), 45.34, 33.30, 28.19, 27.43.  $^{19}\text{F}$  NMR (376 MHz,  $\text{CDCl}_3$ )  $\delta$  -65.53, -72.35. HRMS (ESI-TOF)  $m/z$  Calcd for  $\text{C}_{30}\text{H}_{22}\text{F}_7\text{N}_4\text{O}_2^+$   $[\text{M}+\text{H}]^+$  603.1631, found 603.1638.

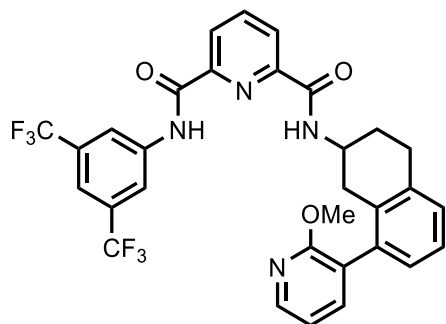

***N*<sup>2</sup>-(3,5-Bis(trifluoromethyl)phenyl)-*N*<sup>6</sup>-(8-(2-methoxypyridin-3-yl)-1,2,3,4-**

**tetrahydronaphthalen-2-yl)pyridine-2,6-dicarboxamide (T9)** Purification by silica gel chromatography eluting with hexane/EA (70/30, v/v), white solid, 56% yield.  $^1\text{H}$  NMR (600

MHz, CDCl<sub>3</sub>) rotameric mixture, resonances for the minor rotamer are enclosed in parenthesis [ ]:  $\delta$  [9.51 (s, 0.31H)], 9.39 (s, 1H), 8.47 (dd,  $J = 12.9, 7.8$  Hz, 2H), [8.43 (d,  $J = 7.9$  Hz, 0.65H)], 8.20 (dd,  $J = 5.0, 2.0$  Hz, 1H), [8.18 – 8.16 (m, 0.34H)], 8.13 (t,  $J = 7.8$  Hz, 2H), 8.04 (s, 2H), 7.89 (d,  $J = 7.4$  Hz, 1H), [7.69 (s, 0.34H)], 7.61 (s, 1H), [7.57 (d,  $J = 8.4$  Hz, 0.31H)], 7.52 (dd,  $J = 7.2, 2.0$  Hz, 1H), [7.36 (d,  $J = 6.0$  Hz, 0.34H)], [7.25 – 7.14 (m, 2.62H)], [7.07 – 7.01 (m, 2.34H)], [6.90 (t,  $J = 6.1$  Hz, 0.32H)], [4.57 (s, 1.35H)], [3.93 (s, 1H)], 3.76 (s, 3H), [3.13 (dt,  $J = 15.0, 6.9$  Hz, 0.32H)], [3.06 (dd,  $J = 11.9, 4.7$  Hz, 0.67H)], 2.98 (t,  $J = 7.6$  Hz, 2H), 2.84 – 2.68 (m, 2H), [2.50 (dd,  $J = 16.6, 7.4$  Hz, 0.33H)], 2.38 (dq,  $J = 11.7, 5.9$  Hz, 1H), [2.25 (s, 0.32H)], [2.04 (dtd,  $J = 11.0, 8.2, 4.1$  Hz, 1.34H)]. <sup>13</sup>C NMR (151 MHz, CDCl<sub>3</sub>) rotameric mixture, resonances for the minor rotamer are enclosed in parenthesis [ ]:  $\delta$  162.40, [162.36], 161.69, [161.64], [161.01], 159.91, [149.39], 149.22, 147.76, [147.71], 146.38, [146.31], 139.79, 139.64, [138.99], 138.68, [138.61], 137.58, 136.02, [135.47], 132.33 (q,  $J = 33.5$  Hz), 131.90, 129.06, [128.71], [128.06], 127.90, 126.62, [126.31], [126.26], 126.01, 125.72, [125.69], 124.21, [124.17], 122.97 (q,  $J = 272.8$  Hz), 120.11 – 119.77 (m), [119.75], 118.05 (dq,  $J = 8.9, 4.6, 3.8$  Hz), 117.68, 116.81 – 116.62 (m), [53.64], 53.34, [45.38], 44.89, [33.31], 32.56, [28.28], [27.31], 26.72, 25.57. <sup>19</sup>F NMR (376 MHz, CDCl<sub>3</sub>)  $\delta$  -65.58, [-65.50]. HRMS (ESI-TOF)  $m/z$  Calcd for C<sub>31</sub>H<sub>25</sub>F<sub>6</sub>N<sub>4</sub>O<sub>3</sub><sup>+</sup> [M+H]<sup>+</sup> 615.1831, found 615.1837.

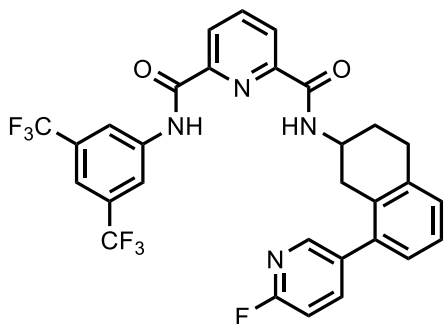

***N*<sup>2</sup>-(3,5-Bis(trifluoromethyl)phenyl)-*N*<sup>6</sup>-(8-(6-fluoropyridin-3-yl)-1,2,3,4-**

**tetrahydronaphthalen-2-yl)pyridine-2,6-dicarboxamide (T10)** Purification by silica gel chromatography eluting with hexane/EA (65/35, v/v), white solid, 85% yield. <sup>1</sup>H NMR (600 MHz, CDCl<sub>3</sub>)  $\delta$  10.07 (s, 1H), 8.42 (dd,  $J = 7.8, 1.2$  Hz, 1H), 8.38 (dd,  $J = 7.8, 1.2$  Hz, 1H), 8.25 (s, 2H), 8.08 – 8.01 (m, 2H), 7.90 (d,  $J = 2.4$  Hz, 1H), 7.70 (td,  $J = 8.1, 2.5$  Hz, 1H), 7.65 (s, 1H), 7.20 (t,  $J = 7.6$  Hz, 1H), 7.12 (d,  $J = 8.1$  Hz, 1H), 6.98 (d,  $J = 7.0$  Hz, 1H), 6.94 (dd,  $J = 8.4, 2.2$  Hz, 1H), 4.44 – 4.36 (m, 1H), 2.96 (dt,  $J = 17.4, 5.1$  Hz, 1H), 2.87 (ddd,  $J = 17.1, 10.4, 6.3$  Hz,

1H), 2.70 (dd,  $J = 16.2, 5.0$  Hz, 1H), 2.52 (dd,  $J = 16.1, 9.6$  Hz, 1H), 2.05 – 1.98 (m, 1H), 1.86 (dtd,  $J = 12.4, 10.4, 6.0$  Hz, 1H).  $^{13}\text{C}$  NMR (151 MHz,  $\text{CDCl}_3$ )  $\delta$  162.78 (d,  $J = 240.1$  Hz), 162.74, 161.85, 148.85, 148.11, 147.23 (d,  $J = 14.3$  Hz), 141.91 (d,  $J = 8.3$  Hz), 139.69, 138.85, 137.31, 135.84, 134.74 (d,  $J = 5.0$  Hz), 132.41 (q,  $J = 33.6$  Hz), 131.71, 129.12, 127.80, 126.41, 126.12, 125.79, 123.07 (q,  $J = 272.9$  Hz), 120.06 (q,  $J = 4.1$  Hz), 118.53 – 117.55 (m), 109.31 (d,  $J = 37.2$  Hz), 45.92, 34.71, 28.77, 28.34.  $^{19}\text{F}$  NMR (376 MHz,  $\text{CDCl}_3$ )  $\delta$  -65.53, -72.68. HRMS (ESI-TOF)  $m/z$  Calcd for  $\text{C}_{30}\text{H}_{22}\text{F}_7\text{N}_4\text{O}_2^+$   $[\text{M}+\text{H}]^+$  603.1631, found 603.1649.

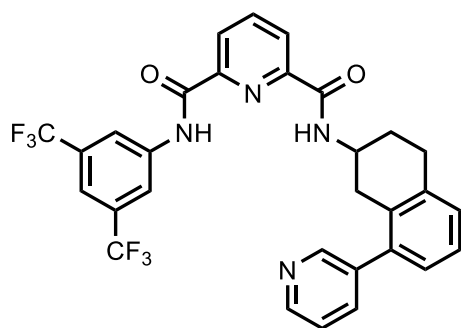

***N*<sup>2</sup>-(3,5-Bis(trifluoromethyl)phenyl)-*N*<sup>6</sup>-(8-(pyridin-3-yl)-1,2,3,4-tetrahydronaphthalen-2-yl)pyridine-2,6-dicarboxamide (T11)** Purification by silica gel chromatography eluting with hexane/EA (50/50, v/v), white solid, 45% yield.  $^1\text{H}$  NMR (600 MHz,  $\text{CDCl}_3$ )  $\delta$  10.05 (s, 1H), 8.52 (dd,  $J = 4.9, 1.7$  Hz, 1H), 8.42 (dd,  $J = 7.8, 1.2$  Hz, 1H), 8.40 – 8.37 (m, 2H), 8.22 (s, 2H), 8.07 (t,  $J = 7.8$  Hz, 1H), 7.98 (d,  $J = 8.8$  Hz, 1H), 7.66 (s, 1H), 7.59 (dt,  $J = 7.8, 1.9$  Hz, 1H), 7.31 (dd,  $J = 7.8, 4.9$  Hz, 1H), 7.22 (t,  $J = 7.6$  Hz, 1H), 7.15 (d,  $J = 7.8$  Hz, 1H), 7.01 (d,  $J = 6.7$  Hz, 1H), 4.43 (ddt,  $J = 13.8, 9.0, 4.6$  Hz, 1H), 3.03 – 2.89 (m, 2H), 2.79 (dd,  $J = 16.3, 4.9$  Hz, 1H), 2.59 (dd,  $J = 16.2, 9.2$  Hz, 1H), 2.07 (d,  $J = 12.4$  Hz, 1H), 1.93 – 1.84 (m, 1H).  $^{13}\text{C}$  NMR (151 MHz,  $\text{CDCl}_3$ )  $\delta$  162.70, 161.92, 149.69, 149.00, 148.22, 148.11, 139.60, 138.87, 138.59, 136.97, 136.58, 135.85, 132.38 (q,  $J = 33.6$  Hz), 131.60, 128.94, 127.84, 126.39, 126.13, 125.74, 123.44, 123.09 (q,  $J = 273.0$  Hz), 120.22 – 120.08 (m), 118.20 – 117.69 (m), 45.89, 34.63, 28.73, 28.23.  $^{19}\text{F}$  NMR (376 MHz,  $\text{CDCl}_3$ )  $\delta$  -65.48. HRMS (ESI-TOF)  $m/z$  Calcd for  $\text{C}_{30}\text{H}_{23}\text{F}_6\text{N}_4\text{O}_2^+$   $[\text{M}+\text{H}]^+$  585.1725, found 585.1729.



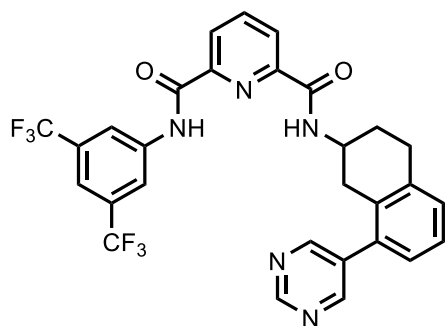

***N*<sup>2</sup>-(3,5-Bis(trifluoromethyl)phenyl)-*N*<sup>6</sup>-(8-(pyrimidin-5-yl)-1,2,3,4-tetrahydronaphthalen-2-yl)pyridine-2,6-dicarboxamide (T12)** Purification by silica gel chromatography eluting with hexane/EA (50/50, v/v), white solid, 72% yield. <sup>1</sup>H NMR (600 MHz, CDCl<sub>3</sub>) δ 9.85 (s, 1H), 9.16 (s, 1H), 8.65 (s, 2H), 8.42 (dd, *J* = 7.8, 1.7 Hz, 2H), 8.21 (s, 2H), 8.09 (t, *J* = 7.8 Hz, 1H), 7.85 (d, *J* = 8.7 Hz, 1H), 7.67 (s, 1H), 7.28 (t, *J* = 7.6 Hz, 1H), 7.23 (d, *J* = 7.5 Hz, 1H), 7.05 (d, *J* = 7.4 Hz, 1H), 4.52 – 4.43 (m, 1H), 3.08 – 2.98 (m, 2H), 2.87 (dd, *J* = 16.2, 5.0 Hz, 1H), 2.65 (dd, *J* = 16.2, 9.1 Hz, 1H), 2.18 – 2.11 (m, 1H), 1.99 – 1.92 (m, 1H). <sup>13</sup>C NMR (151 MHz, CDCl<sub>3</sub>) δ 162.64, 161.72, 157.39, 156.61, 148.99, 148.01, 139.71, 138.70, 136.24, 134.78, 134.76, 132.51 (q, *J* = 33.6 Hz), 131.75, 129.82, 127.96, 126.79, 126.25, 125.80, 123.06 (q, *J* = 273.2 Hz), 120.17 – 119.80 (m), 118.32 – 117.89 (m), 45.75, 34.67, 28.63, 28.16. <sup>19</sup>F NMR (376 MHz, CDCl<sub>3</sub>) δ -65.51. HRMS (ESI-TOF) *m/z* Calcd for C<sub>29</sub>H<sub>22</sub>F<sub>6</sub>N<sub>5</sub>O<sub>2</sub><sup>+</sup> [M+H]<sup>+</sup> 586.1678, found 586.1677.

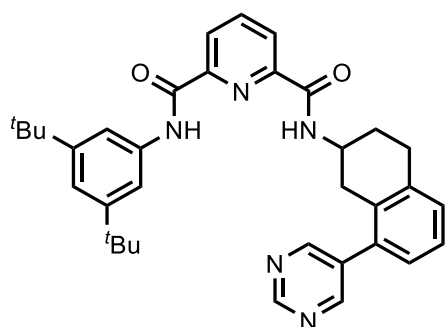

***N*<sup>2</sup>-(3,5-Di-*tert*-butylphenyl)-*N*<sup>6</sup>-(8-(pyrimidin-5-yl)-1,2,3,4-tetrahydronaphthalen-2-yl)pyridine-2,6-dicarboxamide (T13)** Purification by silica gel chromatography eluting with hexane/EA (30/70, v/v), white solid, 80% yield. <sup>1</sup>H NMR (600 MHz, CDCl<sub>3</sub>) δ 9.30 (s, 1H), 9.18 (s, 1H), 8.71 (s, 2H), 8.44 (dd, *J* = 7.8, 1.2 Hz, 1H), 8.37 (dd, *J* = 7.8, 1.2 Hz, 1H), 8.08 (t, *J* = 7.8 Hz, 1H), 7.67 (d, *J* = 8.4 Hz, 1H), 7.51 (d, *J* = 1.7 Hz, 2H), 7.31 – 7.27 (m, 3H), 7.07 (dd, *J* =

6.3, 2.6 Hz, 1H), 4.49 (tdd,  $J = 10.0, 8.7, 3.3$  Hz, 1H), 3.21 – 3.09 (m, 2H), 3.06 (dd,  $J = 16.6, 4.7$  Hz, 1H), 2.72 (dd,  $J = 16.3, 9.0$  Hz, 1H), 2.33 – 2.26 (m, 1H), 1.98 (dtd,  $J = 12.6, 9.7, 6.3$  Hz, 1H), 1.37 (s, 18H).  $^{13}\text{C}$  NMR (151 MHz,  $\text{CDCl}_3$ )  $\delta$  162.82, 161.23, 157.47, 156.59, 151.97, 149.20, 148.78, 139.38, 136.35, 136.31, 134.96, 134.88, 132.15, 129.83, 128.07, 126.69, 125.43, 125.37, 119.41, 115.21, 45.80, 35.02, 34.62, 31.44, 28.72, 28.29. HRMS (ESI-TOF)  $m/z$  Calcd for  $\text{C}_{35}\text{H}_{40}\text{N}_5\text{O}_2^+$   $[\text{M}+\text{H}]^+$  562.3182, found 562.3181.

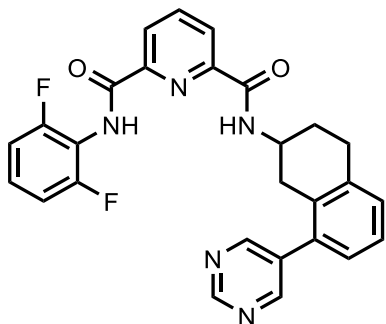

***N*<sup>2</sup>-(2,6-Difluorophenyl)-*N*<sup>6</sup>-(8-(pyrimidin-5-yl)-1,2,3,4-tetrahydronaphthalen-2-yl)pyridine-2,6-dicarboxamide (T14)** Purification by silica gel chromatography eluting with hexane/EA (20/80, v/v), white solid, 51% yield.  $^1\text{H}$  NMR (600 MHz,  $\text{CDCl}_3$ )  $\delta$  9.18 (s, 1H), 8.95 (s, 1H), 8.70 (s, 2H), 8.42 (dd,  $J = 7.7, 1.2$  Hz, 1H), 8.39 (dd,  $J = 7.8, 1.2$  Hz, 1H), 8.08 (t,  $J = 7.8$  Hz, 1H), 7.70 (d,  $J = 8.5$  Hz, 1H), 7.28 (ddd,  $J = 8.5, 6.1, 2.4$  Hz, 1H), 7.25 – 7.21 (m, 2H), 7.05 – 7.02 (m, 3H), 4.47 (tq,  $J = 14.4, 5.4, 4.3$  Hz, 1H), 3.13 – 3.06 (m, 2H), 3.00 (dd,  $J = 16.1, 5.0$  Hz, 1H), 2.71 (dd,  $J = 16.2, 9.3$  Hz, 1H), 2.28 – 2.24 (m, 1H), 1.96 (ddt,  $J = 12.5, 9.8, 4.9$  Hz, 1H).  $^{13}\text{C}$  NMR (151 MHz,  $\text{CDCl}_3$ )  $\delta$  162.64, 161.59, 158.70 (d,  $J = 5.2$  Hz), 157.43, 157.04 (d,  $J = 5.2$  Hz), 156.59, 148.99, 147.91, 139.35, 136.62, 134.89 (d,  $J = 2.8$  Hz), 132.10, 129.81, 128.02 (t,  $J = 9.8$  Hz), 127.89, 126.61, 125.82, 125.72, 113.47, 111.95 (dd,  $J = 19.8, 4.3$  Hz), 45.88, 34.57, 28.76, 28.27.  $^{19}\text{F}$  NMR (376 MHz,  $\text{CDCl}_3$ )  $\delta$  -119.93. HRMS (ESI-TOF)  $m/z$  Calcd for  $\text{C}_{27}\text{H}_{22}\text{F}_2\text{N}_5\text{O}_2^+$   $[\text{M}+\text{H}]^+$  486.1742, found 486.1739.

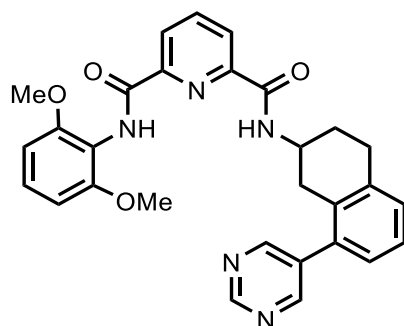

***N*<sup>2</sup>-(2,6-Dimethoxyphenyl)-*N*<sup>6</sup>-(8-(pyrimidin-5-yl)-1,2,3,4-tetrahydronaphthalen-2-yl)pyridine-2,6-dicarboxamide (T15)** Purification by silica gel chromatography eluting with EA, white solid, 50% yield. <sup>1</sup>H NMR (600 MHz, CDCl<sub>3</sub>) δ 9.18 (s, 1H), 8.76 (s, 1H), 8.69 (s, 2H), 8.41 (dd, *J* = 7.7, 1.2 Hz, 1H), 8.34 (dd, *J* = 7.8, 1.2 Hz, 1H), 8.03 (t, *J* = 7.8 Hz, 1H), 7.75 (d, *J* = 8.4 Hz, 1H), 7.26 – 7.20 (m, 3H), 7.02 (dd, *J* = 6.8, 2.0 Hz, 1H), 6.66 (d, *J* = 8.4 Hz, 2H), 4.48 – 4.42 (m, 1H), 3.84 (s, 6H), 3.09 (qq, *J* = 10.7, 6.0, 5.0 Hz, 2H), 3.01 (dd, *J* = 16.1, 4.9 Hz, 1H), 2.70 (dd, *J* = 16.2, 9.4 Hz, 1H), 2.27 (dd, *J* = 11.4, 4.4 Hz, 1H), 1.96 – 1.89 (m, 1H). <sup>13</sup>C NMR (151 MHz, CDCl<sub>3</sub>) δ 162.91, 161.61, 157.43, 156.59, 155.59, 148.96, 148.67, 138.99, 136.68, 134.93, 134.88, 132.27, 129.77, 128.20, 127.87, 126.58, 125.52, 125.12, 113.50, 104.48, 56.15, 45.86, 34.57, 28.86, 28.44. HRMS (ESI-TOF) *m/z* Calcd for C<sub>29</sub>H<sub>28</sub>N<sub>5</sub>O<sub>4</sub><sup>+</sup> [M+H]<sup>+</sup> 510.2141, found 510.2455.

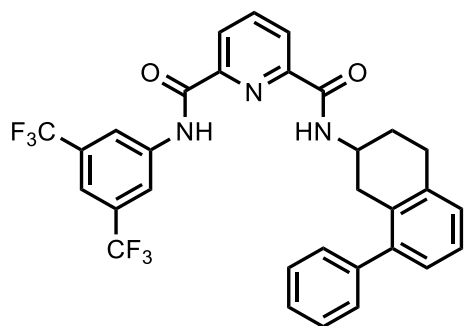

***N*<sup>2</sup>-(3,5-Bis(trifluoromethyl)phenyl)-*N*<sup>6</sup>-(8-phenyl-1,2,3,4-tetrahydronaphthalen-2-yl)pyridine-2,6-dicarboxamide (T16)** Purification by silica gel chromatography eluting with hexane/EA (70/30, v/v), white solid, 89% yield. <sup>1</sup>H NMR (600 MHz, CDCl<sub>3</sub>) δ 9.52 (s, 1H), 8.42 (ddd, *J* = 7.7, 5.6, 1.1 Hz, 2H), 8.15 (s, 2H), 8.09 (t, *J* = 7.8 Hz, 1H), 7.69 (s, 1H), 7.58 (d, *J* = 8.5 Hz, 1H), 7.37 (t, *J* = 7.3 Hz, 2H), 7.33 – 7.30 (m, 1H), 7.27 (t, *J* = 1.8 Hz, 1H), 7.26 (s, 1H), 7.24 (t, *J* = 7.6 Hz, 1H), 7.18 (d, *J* = 7.6 Hz, 1H), 7.10 (d, *J* = 7.4 Hz, 1H), 4.52 (qdd, *J* = 8.4, 4.9,

3.3 Hz, 1H), 3.05 (dd,  $J = 14.9, 5.8$  Hz, 3H), 2.73 (dd,  $J = 16.5, 8.1$  Hz, 1H), 2.23 (ddtd,  $J = 9.5, 7.3, 4.2, 3.7, 1.6$  Hz, 1H), 1.98 (dtd,  $J = 12.7, 8.7, 6.4$  Hz, 1H).  $^{13}\text{C}$  NMR (151 MHz,  $\text{CDCl}_3$ )  $\delta$  162.46, 161.68, 149.36, 147.78, 142.74, 141.26, 139.60, 138.61, 135.70, 132.56 (q,  $J = 33.6$  Hz), 131.25, 129.03, 128.23, 128.12, 127.83, 127.09, 126.24, 125.59, 123.06 (q,  $J = 273.0$  Hz), 119.91 (q,  $J = 4.1$  Hz), 118.48 – 117.90 (m), 45.80, 34.23, 28.57, 27.72.  $^{19}\text{F}$  NMR (376 MHz,  $\text{CDCl}_3$ )  $\delta$  -65.49. HRMS (ESI-TOF)  $m/z$  Calcd for  $\text{C}_{31}\text{H}_{24}\text{F}_6\text{N}_3\text{O}_2^+$   $[\text{M}+\text{H}]^+$  584.1773, found 584.1780.

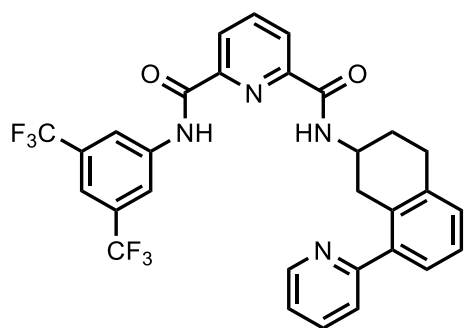

***N*<sup>2</sup>-(3,5-Bis(trifluoromethyl)phenyl)-*N*<sup>6</sup>-(8-(pyridin-2-yl)-1,2,3,4-tetrahydronaphthalen-2-yl)pyridine-2,6-dicarboxamide (T17)** Purification by silica gel chromatography eluting with hexane/EA (50/50, v/v), white solid, 35% yield.  $^1\text{H}$  NMR (600 MHz,  $\text{CDCl}_3$ )  $\delta$  10.15 (s, 1H), 9.01 (d,  $J = 6.7$  Hz, 1H), 8.47 – 8.43 (m, 2H), 8.41 (d,  $J = 7.7$  Hz, 1H), 8.07 (t,  $J = 7.8$  Hz, 1H), 7.92 (s, 2H), 7.72 (td,  $J = 7.7, 1.8$  Hz, 1H), 7.55 (s, 1H), 7.47 (dd,  $J = 7.8, 1.2$  Hz, 1H), 7.28 (d,  $J = 4.8$  Hz, 2H), 7.22 (t,  $J = 4.5$  Hz, 1H), 7.11 (ddd,  $J = 7.6, 4.9, 1.1$  Hz, 1H), 4.58 (h,  $J = 6.2$  Hz, 1H), 3.09 (dd,  $J = 15.7, 4.3$  Hz, 1H), 2.87 (dt,  $J = 16.0, 5.2$  Hz, 1H), 2.76 (ddd,  $J = 16.1, 10.3, 6.0$  Hz, 1H), 2.68 (dd,  $J = 15.7, 5.4$  Hz, 1H), 2.45 (dt,  $J = 13.8, 5.6$  Hz, 1H), 1.83 – 1.74 (m, 1H).  $^{13}\text{C}$  NMR (151 MHz,  $\text{CDCl}_3$ )  $\delta$  163.14, 162.31, 159.91, 149.57, 148.64, 148.06, 140.20, 139.37, 139.17, 138.96, 137.34, 133.04, 131.94 (q,  $J = 33.7$  Hz), 128.31, 126.98, 126.28, 125.92, 125.40, 124.43, 123.09 (q,  $J = 273.0$  Hz), 122.25, 120.24 (q,  $J = 4.2$  Hz), 118.01 – 116.98 (m), 45.77, 30.98, 29.18, 27.62.  $^{19}\text{F}$  NMR (376 MHz,  $\text{CDCl}_3$ )  $\delta$  -65.34. HRMS (ESI-TOF)  $m/z$  Calcd for  $\text{C}_{30}\text{H}_{23}\text{F}_6\text{N}_4\text{O}_2^+$   $[\text{M}+\text{H}]^+$  585.1725, found 585.1728.

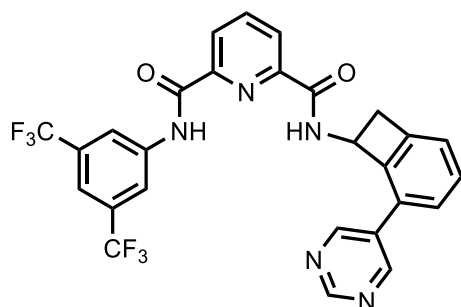

***N*<sup>2</sup>-(3,5-Bis(trifluoromethyl)phenyl)- *N*<sup>6</sup>-(5-(pyrimidin-5-yl)bicyclo[4.2.0]octa-1(6),2,4-trien-7-yl)pyridine-2,6-dicarboxamide (T18)** Purification by silica gel chromatography eluting with hexane/EA (50/50, v/v), pale yellow solid, 56% yield. <sup>1</sup>H NMR (600 MHz, CDCl<sub>3</sub>) δ 9.77 (s, 1H), 9.01 (s, 1H), 8.98 (s, 2H), 8.46 (d, *J* = 9.3 Hz, 1H), 8.41 (dd, *J* = 13.3, 7.5 Hz, 2H), 8.12 – 8.03 (m, 3H), 7.58 (s, 1H), 7.46 – 7.40 (m, 2H), 7.18 (d, *J* = 6.9 Hz, 1H), 6.03 (ddd, *J* = 9.5, 5.2, 2.5 Hz, 1H), 3.86 (dd, *J* = 14.6, 5.2 Hz, 1H), 3.33 (dd, *J* = 14.5, 2.5 Hz, 1H). <sup>13</sup>C NMR (151 MHz, CDCl<sub>3</sub>) δ 163.32, 162.01, 157.54, 154.83, 148.93, 148.19, 144.37, 142.46, 139.62, 138.50, 132.29 (q, *J* = 33.6 Hz), 130.68, 130.62, 129.09, 126.56, 125.97, 125.37, 124.12, 122.93 (q, *J* = 273.0 Hz), 120.41 (dd, *J* = 8.7, 4.2 Hz), 118.35 – 117.96 (m), 50.42, 40.42. <sup>19</sup>F NMR (376 MHz, CDCl<sub>3</sub>) δ -65.66. HRMS (ESI-TOF) *m/z* Calcd for C<sub>27</sub>H<sub>18</sub>F<sub>6</sub>N<sub>5</sub>O<sub>2</sub><sup>+</sup> [M+H]<sup>+</sup> 558.1365, found 558.1369.

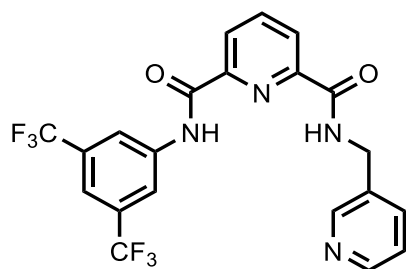

***N*<sup>2</sup>-(3,5-Bis(trifluoromethyl)phenyl)-*N*<sup>6</sup>-(pyridin-3-ylmethyl)pyridine-2,6-dicarboxamide (T19)** Purification by silica gel chromatography eluting with hexane/EA (20/80, v/v), white solid, 43% yield. <sup>1</sup>H NMR (600 MHz, CDCl<sub>3</sub>) δ 10.41 (s, 1H), 9.03 (t, *J* = 6.4 Hz, 1H), 8.51 (d, *J* = 7.8 Hz, 2H), 8.44 (dd, *J* = 4.9, 1.6 Hz, 1H), 8.22 (d, *J* = 2.2 Hz, 1H), 8.17 (t, *J* = 7.8 Hz, 1H), 8.06 (s, 2H), 7.68 (dt, *J* = 8.0, 2.0 Hz, 1H), 7.57 (s, 1H), 7.20 (dd, *J* = 7.9, 4.8 Hz, 1H), 4.56 (d, *J* = 6.2 Hz, 2H). <sup>13</sup>C NMR (151 MHz, CDCl<sub>3</sub>) δ 163.88, 162.18, 148.88, 148.72, 148.71, 148.33, 139.64, 138.81, 136.40, 134.65, 132.18 (q, *J* = 33.6 Hz), 126.30, 125.96, 124.24, 123.00 (q, *J* = 272.9

Hz), 120.38 (dd,  $J = 7.8, 4.1$  Hz), 118.03 – 117.65 (m), 40.77.  $^{19}\text{F}$  NMR (376 MHz,  $\text{CDCl}_3$ )  $\delta$  -65.65. HRMS (ESI-TOF)  $m/z$ . Calcd for  $\text{C}_{21}\text{H}_{15}\text{F}_6\text{N}_4\text{O}_2^+$   $[\text{M}+\text{H}]^+$  469.1099, found 469.1093.

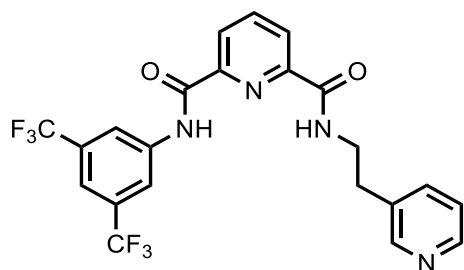

***N*<sup>2</sup>-(3,5-Bis(trifluoromethyl)phenyl)-*N*<sup>6</sup>-(2-(pyridin-3-yl)ethyl)pyridine-2,6-dicarboxamide**

**(T20)** Purification by silica gel chromatography eluting with hexane/EA (20/80, v/v), pale yellow solid, 45% yield.  $^1\text{H}$  NMR (600 MHz,  $\text{CDCl}_3$ )  $\delta$  9.86 (s, 1H), 8.49 – 8.41 (m, 4H), 8.24 (s, 2H), 8.15 (t,  $J = 7.8$  Hz, 1H), 8.11 (d,  $J = 6.5$  Hz, 1H), 7.65 (s, 1H), 7.58 (dt,  $J = 7.8, 1.9$  Hz, 1H), 7.25 (dd,  $J = 7.7, 4.8$  Hz, 1H), 3.71 (q,  $J = 6.6$  Hz, 2H), 2.96 (t,  $J = 6.7$  Hz, 2H).  $^{13}\text{C}$  NMR (151 MHz,  $\text{CDCl}_3$ )  $\delta$  163.56, 161.98, 150.10, 149.22, 148.20, 148.11, 139.65, 138.79, 136.74, 134.65, 132.35 (q,  $J = 33.6$  Hz), 126.13, 125.85, 123.91, 123.10 (q,  $J = 273.2$  Hz), 120.74 – 119.75 (m), 118.23 – 117.79 (m), 40.56, 32.93.  $^{19}\text{F}$  NMR (376 MHz,  $\text{CDCl}_3$ )  $\delta$  -65.51. HRMS (ESI-TOF)  $m/z$ . Calcd for  $\text{C}_{22}\text{H}_{17}\text{F}_6\text{N}_4\text{O}_2^+$   $[\text{M}+\text{H}]^+$  483.1256, found 483.1255.

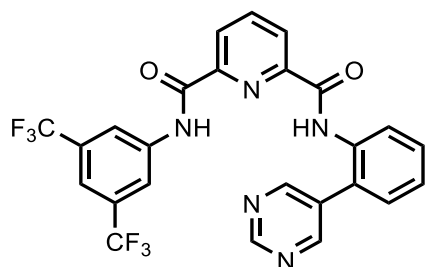

***N*<sup>2</sup>-(3,5-Bis(trifluoromethyl)phenyl)-*N*<sup>6</sup>-(2-(pyrimidin-5-yl)phenyl)pyridine-2,6-**

**dicarboxamide (T21)** Purification by silica gel chromatography eluting with hexane/EA (50/50, v/v), colorless oil, 49% yield.  $^1\text{H}$  NMR (600 MHz,  $\text{CDCl}_3$ )  $\delta$  9.43 (s, 1H), 9.12 (s, 1H), 9.00 (s, 2H), 8.94 (s, 1H), 8.50 (ddd,  $J = 12.2, 7.8, 1.2$  Hz, 2H), 8.45 (d,  $J = 8.3$  Hz, 1H), 8.34 (s, 2H), 8.17 (t,  $J = 7.8$  Hz, 1H), 7.75 (s, 1H), 7.58 (dt,  $J = 8.6, 4.3$  Hz, 1H), 7.40 (d,  $J = 4.4$  Hz, 2H).  $^{13}\text{C}$  NMR (151 MHz,  $\text{CDCl}_3$ )  $\delta$  161.80, 161.27, 157.87, 156.95, 149.19, 148.60, 139.89, 138.29, 134.09, 132.39 (q,  $J = 33.6$  Hz), 132.25, 130.54, 130.27, 126.65, 126.29, 126.23, 123.34, 123.12

(q,  $J = 273.3$  Hz), 121.44 (dd,  $J = 8.9, 5.0$  Hz), 118.69 – 118.21 (m).  $^{19}\text{F}$  NMR (376 MHz,  $\text{CDCl}_3$ )  $\delta$  -65.52. HRMS (ESI-TOF)  $m/z$ . Calcd for  $\text{C}_{25}\text{H}_{16}\text{F}_6\text{N}_5\text{O}_2^+$   $[\text{M}+\text{H}]^+$  532.1208, found 532.1207.

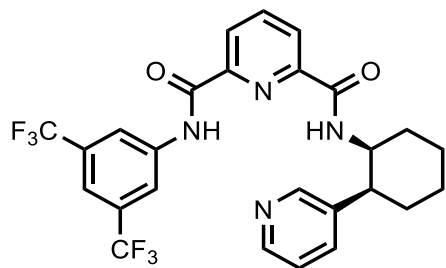

***N*<sup>2</sup>-(3,5-Bis(trifluoromethyl)phenyl)-*N*<sup>6</sup>-*cis*-(2-(pyridin-3-yl)cyclohexyl)pyridine-2,6-**

**dicarboxamide (*cis*-T22)** Purification by silica gel chromatography eluting with DCM/EA (50/50, v/v), colorless oil, 12% yield.  $^1\text{H}$  NMR (600 MHz,  $\text{CDCl}_3$ )  $\delta$  9.94 (s, 1H), 8.35 – 8.31 (m, 2H), 8.30 (d,  $J = 2.3$  Hz, 1H), 8.28 (d,  $J = 7.8$  Hz, 3H), 8.02 (t,  $J = 7.8$  Hz, 1H), 7.97 (d,  $J = 8.9$  Hz, 1H), 7.64 (s, 1H), 7.61 (dt,  $J = 8.0, 2.0$  Hz, 1H), 7.13 (dd,  $J = 8.0, 4.8$  Hz, 1H), 4.12 (ddt,  $J = 15.3, 11.4, 4.0$  Hz, 1H), 2.66 (td,  $J = 11.8, 3.2$  Hz, 1H), 2.15 (dd,  $J = 12.6, 3.7$  Hz, 1H), 1.86 – 1.75 (m, 3H), 1.52 – 1.43 (m, 2H), 1.40 (ddd,  $J = 16.2, 8.1, 3.3$  Hz, 1H), 1.34 – 1.27 (m, 1H).  $^{13}\text{C}$  NMR (151 MHz,  $\text{CDCl}_3$ )  $\delta$  162.88, 162.37, 149.53, 149.51, 148.24, 147.86, 139.27, 139.24, 138.91, 134.35, 132.28 (q,  $J = 33.3$  Hz), 126.03, 125.53, 123.97, 123.10 (q,  $J = 273.2$  Hz), 120.56 (q,  $J = 4.8, 4.2$  Hz), 118.20 – 117.58 (m), 52.94, 47.26, 34.38, 33.53, 25.81, 25.24.  $^{19}\text{F}$  NMR (376 MHz,  $\text{CDCl}_3$ )  $\delta$  -65.57. HRMS (ESI-TOF)  $m/z$ . Calcd for  $\text{C}_{26}\text{H}_{23}\text{F}_6\text{N}_4\text{O}_2^+$   $[\text{M}+\text{H}]^+$  537.1725, found 537.1725.

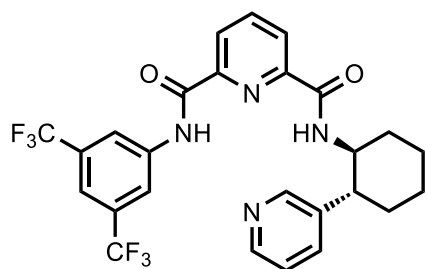

***N*<sup>2</sup>-(3,5-Bis(trifluoromethyl)phenyl)-*N*<sup>6</sup>-*trans*-(2-(pyridin-3-yl)cyclohexyl)pyridine-2,6-**

**dicarboxamide (*trans*-T22)** Purification by silica gel chromatography eluting with DCM/EA (50/50, v/v), colorless oil, 10% yield.  $^1\text{H}$  NMR (600 MHz,  $\text{CDCl}_3$ )  $\delta$  9.74 (s, 1H), 8.65 (d,  $J = 2.3$  Hz, 1H), 8.48 (s, 2H), 8.43 (dd,  $J = 4.8, 1.6$  Hz, 1H), 8.40 (dd,  $J = 7.7, 1.2$  Hz, 1H), 8.25 (dd,  $J = 7.8, 1.2$  Hz, 1H), 8.07 (t,  $J = 7.8$  Hz, 1H), 7.71 (d,  $J = 8.6$  Hz, 2H), 7.65 (dt,  $J = 8.0, 2.0$  Hz, 1H),

7.23 (dd,  $J = 7.9, 4.8$  Hz, 1H), 4.56 (dq,  $J = 8.1, 3.9$  Hz, 1H), 3.18 (dt,  $J = 11.2, 3.9$  Hz, 1H), 2.19 – 2.13 (m, 1H), 2.08 (dt,  $J = 12.3, 4.1$  Hz, 1H), 2.04 – 1.96 (m, 2H), 1.84 (dddd,  $J = 26.2, 12.7, 7.3, 3.6$  Hz, 2H), 1.66 – 1.62 (m, 1H), 1.59 – 1.54 (m, 1H).  $^{13}\text{C}$  NMR (151 MHz,  $\text{CDCl}_3$ )  $\delta$  162.61, 162.02, 149.50, 148.46, 148.21, 148.16, 139.66, 139.00, 137.96, 135.78, 132.60 (q,  $J = 33.6$  Hz), 125.95, 125.62, 123.68, 123.16 (q,  $J = 273.2$  Hz), 120.10 (dd,  $J = 8.6, 4.2$  Hz), 118.05 (d,  $J = 4.1$  Hz), 49.86, 43.29, 30.62, 26.13, 25.10, 21.25.  $^{19}\text{F}$  NMR (376 MHz,  $\text{CDCl}_3$ )  $\delta$  -65.62. HRMS (ESI-TOF)  $m/z$  Calcd for  $\text{C}_{26}\text{H}_{23}\text{F}_6\text{N}_4\text{O}_2^+$   $[\text{M}+\text{H}]^+$  537.1725, found 537.1728.

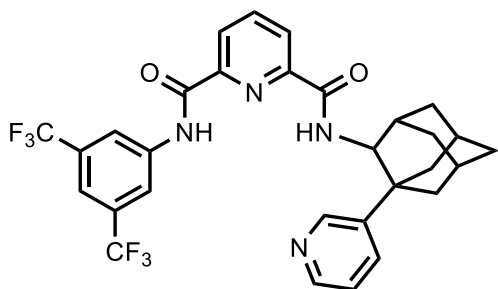

***N*<sup>2</sup>-(3,5-Bis(trifluoromethyl)phenyl)-*N*<sup>6</sup>-((1*R*,3*S*,5*R*,7*S*)-1-(pyridin-3-yl)adamantan-2-**

**yl)pyridine-2,6-dicarboxamide (T23)** Purification by silica gel chromatography eluting with hexane/EA (15/85, v/v), white solid, 20% yield.  $^1\text{H}$  NMR (600 MHz,  $\text{CDCl}_3$ )  $\delta$  9.62 (s, 1H), 8.70 (d,  $J = 1.7$  Hz, 1H), 8.41 (dd,  $J = 4.7, 1.6$  Hz, 1H), 8.38 (s, 2H), 8.35 (dd,  $J = 7.7, 1.1$  Hz, 1H), 8.23 (dd,  $J = 7.8, 1.1$  Hz, 1H), 8.04 (t,  $J = 7.8$  Hz, 1H), 7.81 (ddd,  $J = 8.2, 2.5, 1.6$  Hz, 1H), 7.71 – 7.66 (m, 2H), 7.24 (dd,  $J = 8.1, 4.7$  Hz, 1H), 4.58 (dd,  $J = 8.5, 3.1$  Hz, 1H), 2.40 (q,  $J = 3.2$  Hz, 1H), 2.38 – 2.32 (m, 1H), 2.30 – 2.23 (m, 3H), 2.16 (p,  $J = 3.2$  Hz, 1H), 2.12 (dt,  $J = 12.9, 2.7$  Hz, 1H), 2.02 (dq,  $J = 12.9, 3.0$  Hz, 1H), 1.95 – 1.88 (m, 3H), 1.85 – 1.81 (m, 2H).  $^{13}\text{C}$  NMR (151 MHz,  $\text{CDCl}_3$ )  $\delta$  162.27, 161.75, 149.26, 147.97, 147.87, 146.90, 141.74, 139.67, 138.94, 133.13, 132.67 (q,  $J = 33.6$  Hz), 125.85, 125.42, 123.62, 123.14 (q,  $J = 273$  Hz), 120.02 – 119.38 (m), 118.16 – 117.76 (m), 56.61, 44.81, 38.85, 36.56, 36.34, 35.44, 32.68, 31.20, 28.08, 27.70.  $^{19}\text{F}$  NMR (376 MHz,  $\text{CDCl}_3$ )  $\delta$  -65.64. HRMS (ESI-TOF)  $m/z$  Calcd for  $\text{C}_{30}\text{H}_{27}\text{F}_6\text{N}_4\text{O}_2^+$   $[\text{M}+\text{H}]^+$  589.2038, found 589.2037.



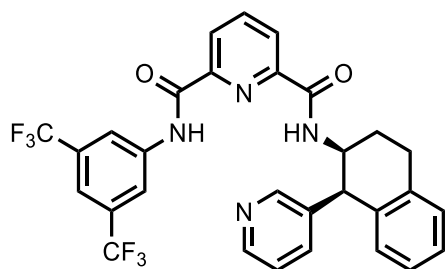

***N*<sup>2</sup>-(3,5-Bis(trifluoromethyl)phenyl)-*N*<sup>6</sup>-*cis*-(1-(pyridin-3-yl)-1,2,3,4-tetrahydronaphthalen-2-yl)pyridine-2,6-dicarboxamide (*cis*-T24)** Purification by silica gel chromatography eluting with DCM/EA (80/20, v/v), colorless oil, 25% yield. <sup>1</sup>H NMR (600 MHz, CDCl<sub>3</sub>) δ 9.47 (s, 1H), 8.67 (d, *J* = 2.3 Hz, 1H), 8.46 (ddd, *J* = 13.7, 7.8, 1.2 Hz, 2H), 8.40 (s, 2H), 8.32 (dd, *J* = 4.7, 1.7 Hz, 1H), 8.13 (t, *J* = 7.8 Hz, 1H), 7.72 (s, 1H), 7.26 (s, 1H), 7.26 – 7.25 (m, 1H), 7.24 – 7.18 (m, 2H), 7.18 – 7.13 (m, 2H), 6.97 (d, *J* = 7.6 Hz, 1H), 4.93 – 4.87 (m, 1H), 4.56 (d, *J* = 5.6 Hz, 1H), 3.18 (ddd, *J* = 17.8, 11.4, 6.5 Hz, 1H), 3.11 (ddd, *J* = 17.4, 6.1, 2.4 Hz, 1H), 1.92 (ddt, *J* = 9.4, 6.1, 3.1 Hz, 1H), 1.81 (ddt, *J* = 18.8, 12.7, 6.1 Hz, 1H). <sup>13</sup>C NMR (151 MHz, CDCl<sub>3</sub>) δ 162.71, 162.25, 151.18, 149.56, 148.69, 148.18, 139.49, 138.82, 138.40, 136.99, 135.86, 135.58, 132.22 (q, *J* = 33.6 Hz), 130.55, 128.99, 127.39, 126.71, 126.32, 126.22, 123.64, 123.23 (q, *J* = 273 Hz), 121.50 (q, *J* = 4.3 Hz), 118.35 – 118.03 (m), 47.94, 45.73, 28.45, 24.33. <sup>19</sup>F NMR (376 MHz, CDCl<sub>3</sub>) δ -65.41. HRMS (ESI-TOF) *m/z* Calcd for C<sub>30</sub>H<sub>23</sub>F<sub>6</sub>N<sub>4</sub>O<sub>2</sub><sup>+</sup> [M+H]<sup>+</sup> 585.1725, found 585.1729.

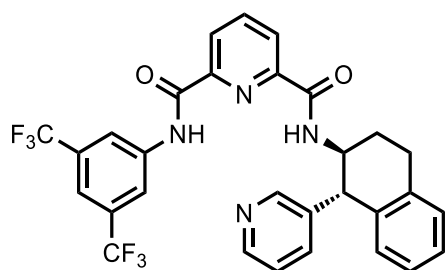

***N*<sup>2</sup>-(3,5-Bis(trifluoromethyl)phenyl)-*N*<sup>6</sup>-*trans*-(1-(pyridin-3-yl)-1,2,3,4-tetrahydronaphthalen-2-yl)pyridine-2,6-dicarboxamide (*trans*-T24)** Purification by silica gel chromatography eluting with DCM/EA (50/50, v/v), colorless oil, 15% yield. <sup>1</sup>H NMR (600 MHz, CDCl<sub>3</sub>) δ 9.43 (s, 1H), 8.53 – 8.48 (m, 2H), 8.42 (dd, *J* = 7.8, 1.2 Hz, 1H), 8.39 (dd, *J* = 7.8, 1.2 Hz, 1H), 8.24 (s, 2H), 8.11 (t, *J* = 7.8 Hz, 1H), 7.77 (d, *J* = 8.3 Hz, 1H), 7.70 (s, 1H), 7.44 (dt, *J* = 7.9, 2.0 Hz, 1H), 7.29 (d, *J* = 7.2 Hz, 1H), 7.26 – 7.24 (m, 2H), 7.17 (t, *J* = 7.5 Hz, 1H), 6.94 (d, *J* = 7.7 Hz, 1H), 4.60 – 4.54 (m, 1H), 4.37 (d, *J* = 6.1 Hz, 1H), 3.17 (dt, *J* = 17.6,

6.3 Hz, 1H), 3.06 (dt,  $J = 17.6, 7.1$  Hz, 1H), 2.23 (dddd,  $J = 14.0, 7.9, 6.3, 2.8$  Hz, 1H), 2.04 (dq,  $J = 13.4, 6.5$  Hz, 1H).  $^{13}\text{C}$  NMR (151 MHz,  $\text{CDCl}_3$ )  $\delta$  162.76, 161.71, 150.49, 149.18, 148.47, 147.98, 139.69, 139.04, 138.72, 136.28, 135.81, 134.70, 132.54 (q,  $J = 33.5$  Hz), 130.80, 129.13, 127.50, 126.88, 126.06, 125.74, 123.82, 123.12 (q,  $J = 273$  Hz), 119.93 (dd,  $J = 8.1, 3.8$  Hz), 118.40 – 117.95 (m), 51.81, 48.55, 26.00, 24.49.  $^{19}\text{F}$  NMR (376 MHz,  $\text{CDCl}_3$ )  $\delta$  -65.46. HRMS (ESI-TOF)  $m/z$  Calcd for  $\text{C}_{30}\text{H}_{23}\text{F}_6\text{N}_4\text{O}_2^+$   $[\text{M}+\text{H}]^+$  585.1725, found 585.1730.

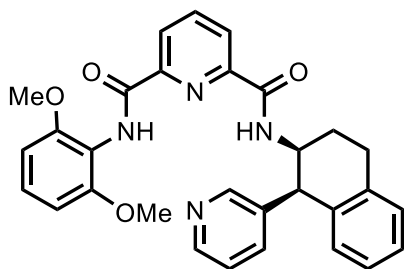

***N*<sup>2</sup>-(2,6-Dimethoxyphenyl)-*N*<sup>6</sup>-*cis*-(1-(pyridin-3-yl)-1,2,3,4-tetrahydronaphthalen-2-yl)pyridine-2,6-dicarboxamide (*cis*-T25)** Purification by silica gel chromatography eluting with EA, white solid, 17% yield.  $^1\text{H}$  NMR (600 MHz,  $\text{CDCl}_3$ )  $\delta$  8.46 – 8.40 (m, 2H), 8.37 (d,  $J = 7.8$  Hz, 1H), 8.30 (s, 1H), 8.06 (t,  $J = 7.8$  Hz, 1H), 8.02 (d,  $J = 4.4$  Hz, 1H), 7.40 (d,  $J = 9.3$  Hz, 1H), 7.36 (d,  $J = 8.2$  Hz, 1H), 7.28 (t,  $J = 8.4$  Hz, 1H), 7.24 (d,  $J = 7.7$  Hz, 1H), 7.20 (t,  $J = 7.4$  Hz, 1H), 7.10 (t,  $J = 7.4$  Hz, 1H), 7.02 (dd,  $J = 7.9, 4.9$  Hz, 1H), 6.92 (d,  $J = 7.7$  Hz, 1H), 6.68 (d,  $J = 8.5$  Hz, 2H), 4.82 (dddd,  $J = 12.3, 9.2, 5.6, 3.4$  Hz, 1H), 4.55 (d,  $J = 5.8$  Hz, 1H), 3.83 (s, 6H), 3.22 – 3.07 (m, 2H), 2.03 – 1.96 (m, 1H), 1.90 (qd,  $J = 12.1, 6.0$  Hz, 1H).  $^{13}\text{C}$  NMR (151 MHz,  $\text{CDCl}_3$ )  $\delta$  162.80, 161.66, 155.72, 151.72, 149.19, 148.61, 148.21, 139.05, 137.69, 136.77, 135.90, 135.79, 130.63, 128.92, 128.22, 127.14, 126.51, 125.68, 125.01, 122.67, 113.51, 104.41, 56.07, 48.06, 46.02, 28.40, 24.55. HRMS (ESI-TOF)  $m/z$  Calcd for  $\text{C}_{30}\text{H}_{29}\text{N}_4\text{O}_4^+$   $[\text{M}+\text{H}]^+$  509.2189, found 509.2187.

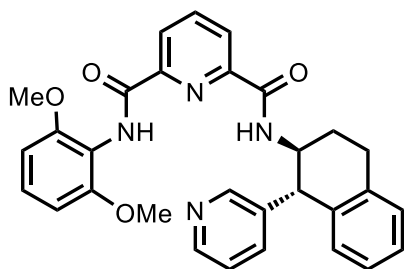

***N*<sup>2</sup>-(2,6-Dimethoxyphenyl)-*N*<sup>6</sup>-*trans*-(1-(pyridin-3-yl)-1,2,3,4-tetrahydronaphthalen-2-yl)pyridine-2,6-dicarboxamide (*trans*-T25)** Purification by silica gel chromatography eluting with EA, white solid, 20% yield. <sup>1</sup>H NMR (600 MHz, CDCl<sub>3</sub>) δ 8.75 (s, 1H), 8.45 (d, *J* = 6.2 Hz, 2H), 8.40 (d, *J* = 7.7 Hz, 1H), 8.27 (d, *J* = 7.8 Hz, 1H), 8.00 (dt, *J* = 14.6, 8.2 Hz, 2H), 7.48 (dt, *J* = 8.0, 2.0 Hz, 1H), 7.28 – 7.24 (m, 2H), 7.21 – 7.17 (m, 2H), 7.10 (t, *J* = 7.4 Hz, 1H), 7.04 (t, *J* = 7.5 Hz, 1H), 6.80 (d, *J* = 7.7 Hz, 1H), 6.67 (d, *J* = 8.5 Hz, 2H), 4.56 (ddt, *J* = 11.1, 8.2, 3.9 Hz, 1H), 4.29 (d, *J* = 6.9 Hz, 1H), 3.86 (s, 6H), 3.14 (dt, *J* = 17.4, 6.8 Hz, 1H), 3.03 (dt, *J* = 17.3, 6.4 Hz, 1H), 2.22 (dtd, *J* = 13.3, 6.6, 2.5 Hz, 1H), 1.98 (dt, *J* = 14.0, 7.1 Hz, 1H). <sup>13</sup>C NMR (151 MHz, CDCl<sub>3</sub>) δ 163.07, 161.36, 155.47, 150.58, 148.89, 148.49, 148.33, 139.21, 139.01, 136.39, 135.87, 135.62, 130.61, 128.93, 128.03, 126.93, 126.49, 125.48, 124.90, 123.59, 113.58, 104.44, 56.17, 51.93, 48.90, 26.71, 25.86. HRMS (ESI-TOF) *m/z*. Calcd for C<sub>30</sub>H<sub>29</sub>N<sub>4</sub>O<sub>4</sub><sup>+</sup> [M+H]<sup>+</sup> 509.2189, found 509.2180.

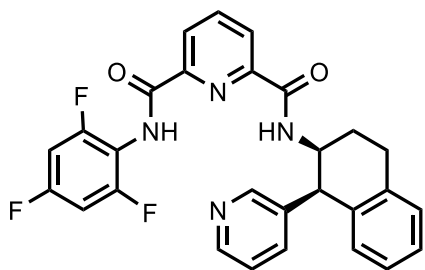

***N*<sup>2</sup>-*cis*-(1-(Pyridin-3-yl)-1,2,3,4-tetrahydronaphthalen-2-yl)-*N*<sup>6</sup>-(2,4,6-trifluorophenyl)pyridine-2,6-dicarboxamide (*cis*-T26)** Purification by silica gel chromatography eluting with DCM/EA (80/20, v/v), white solid, 19% yield. <sup>1</sup>H NMR (600 MHz, CDCl<sub>3</sub>) δ 8.82 (s, 1H), 8.59 (d, *J* = 2.3 Hz, 1H), 8.41 (ddd, *J* = 11.8, 7.8, 1.2 Hz, 2H), 8.11 – 8.06 (m, 2H), 7.31 (d, *J* = 9.6 Hz, 1H), 7.25 – 7.20 (m, 2H), 7.18 (dt, *J* = 7.9, 2.0 Hz, 1H), 7.15 – 7.09 (m, 2H), 6.94 (d, *J* = 7.7 Hz, 1H), 6.87 – 6.82 (m, 2H), 4.83 (tdt, *J* = 9.2, 5.8, 3.2 Hz, 1H), 4.52 (d, *J* = 5.8 Hz, 1H), 3.17 (ddd, *J* = 17.8, 11.8, 6.3 Hz, 1H), 3.08 (ddd, *J* = 17.4, 6.0, 2.3 Hz, 1H), 1.96 (ddd, *J* = 11.9, 5.8, 2.7 Hz, 1H), 1.80 (qd, *J* = 12.5, 6.0 Hz, 1H). <sup>13</sup>C NMR (151 MHz, CDCl<sub>3</sub>) δ 162.57, 162.43, 160.41 (t, *J* = 14.9 Hz), 159.62 (dd, *J* = 15.4, 7.2 Hz), 157.95 (dd, *J* = 15.3, 7.4 Hz), 151.45, 149.28, 148.29, 148.21, 139.27, 138.18, 136.91, 135.93, 135.63, 130.60, 128.96, 127.25, 126.59, 126.05, 125.79, 123.40, 101.12 – 100.23 (m), 47.83, 45.78, 28.48, 24.43. <sup>19</sup>F NMR (376 MHz, CDCl<sub>3</sub>) δ -110.98 (t, *J* = 5.2 Hz), -116.18 (d, *J* = 6.6 Hz). HRMS (ESI-TOF) *m/z*. Calcd for C<sub>28</sub>H<sub>22</sub>F<sub>3</sub>N<sub>4</sub>O<sub>2</sub><sup>+</sup> [M+H]<sup>+</sup> 503.1695, found 503.1697.

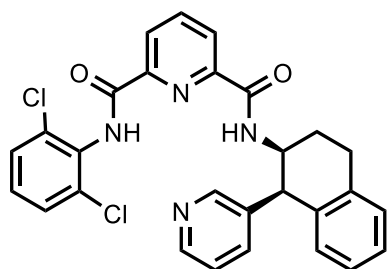

***N*<sup>2</sup>-(2,6-Dichlorophenyl)-*N*<sup>6</sup>-*cis*-(1-(pyridin-3-yl)-1,2,3,4-tetrahydronaphthalen-2-**

**yl)pyridine-2,6-dicarboxamide (*cis*-T27)** Purification by silica gel chromatography eluting with DCM/EA (80/20, v/v), white solid, 13% yield. <sup>1</sup>H NMR (600 MHz, CDCl<sub>3</sub>) δ 9.03 (s, 1H), 8.50 (d, *J* = 2.3 Hz, 1H), 8.43 (ddd, *J* = 11.9, 7.8, 1.2 Hz, 2H), 8.10 (t, *J* = 7.8 Hz, 1H), 8.00 (dd, *J* = 4.8, 1.7 Hz, 1H), 7.47 (d, *J* = 8.2 Hz, 2H), 7.37 (d, *J* = 9.5 Hz, 1H), 7.28 (t, *J* = 8.1 Hz, 1H), 7.25 – 7.19 (m, 3H), 7.11 (t, *J* = 7.4 Hz, 1H), 7.07 (dd, *J* = 7.8, 4.7 Hz, 1H), 6.92 (d, *J* = 7.1 Hz, 1H), 4.81 (dddd, *J* = 12.6, 9.2, 5.8, 3.2 Hz, 1H), 4.55 (d, *J* = 5.7 Hz, 1H), 3.18 (ddd, *J* = 17.8, 11.6, 6.3 Hz, 1H), 3.10 (ddd, *J* = 17.4, 6.1, 2.4 Hz, 1H), 1.99 (ddd, *J* = 12.4, 6.1, 3.0 Hz, 1H), 1.89 – 1.81 (m, 1H). <sup>13</sup>C NMR (151 MHz, CDCl<sub>3</sub>) δ 162.49, 161.55, 151.50, 148.97, 148.33, 148.24, 139.35, 137.90, 136.83, 135.82, 135.76, 134.07, 132.08, 130.63, 128.93, 128.84, 128.49, 127.19, 126.56, 125.88, 125.61, 123.18, 47.96, 45.79, 28.39, 24.49. HRMS (ESI-TOF) *m/z* Calcd for C<sub>28</sub>H<sub>23</sub>Cl<sub>2</sub>N<sub>4</sub>O<sub>2</sub><sup>+</sup> [M+H]<sup>+</sup> 517.1198, found 517.1183.

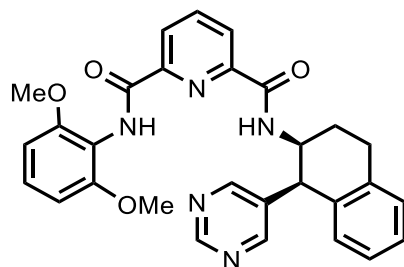

***N*<sup>2</sup>-(2,6-Dimethoxyphenyl)-*N*<sup>6</sup>-*cis*-(1-(pyrimidin-5-yl)-1,2,3,4-tetrahydronaphthalen-2-**

**yl)pyridine-2,6-dicarboxamide (*cis*-T28)** Purification by silica gel chromatography eluting with DCM/EA (35/65, v/v), colorless oil, 23% yield. <sup>1</sup>H NMR (600 MHz, CDCl<sub>3</sub>) δ 8.74 (s, 1H), 8.54 (s, 1H), 8.43 (dd, *J* = 7.7, 1.2 Hz, 1H), 8.38 (s, 2H), 8.36 (dd, *J* = 7.8, 1.2 Hz, 1H), 8.07 (t, *J* = 7.8 Hz, 1H), 7.33 (d, *J* = 8.7 Hz, 1H), 7.26 – 7.20 (m, 3H), 7.14 (t, *J* = 7.3 Hz, 1H), 6.92 (d, *J* = 7.4 Hz, 1H), 6.66 (d, *J* = 8.5 Hz, 2H), 4.79 (dddd, *J* = 12.0, 8.7, 5.7, 3.1 Hz, 1H), 4.67 (d, *J* = 5.6 Hz, 1H), 3.82 (s, 6H), 3.20 – 3.12 (m, 2H), 2.03 – 1.99 (m, 1H), 1.89 – 1.81 (m, 1H). <sup>13</sup>C NMR (151 MHz, CDCl<sub>3</sub>) δ 163.29, 161.56, 158.15, 157.27, 155.60, 149.50, 148.40, 139.14, 135.67,

134.73, 134.45, 130.44, 129.11, 128.10, 127.59, 126.87, 125.95, 125.05, 113.54, 104.42, 56.09, 48.33, 43.83, 28.15, 24.46. HRMS (ESI-TOF)  $m/z$  Calcd for  $C_{29}H_{28}N_5O_4^+$   $[M+H]^+$  510.2141, found 510.2138.

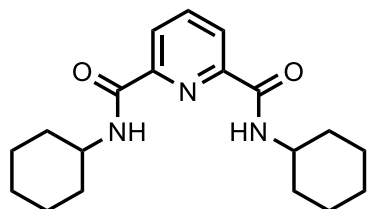

***N*<sup>2</sup>,*N*<sup>6</sup>-Dicyclohexylpyridine-2,6-dicarboxamide (TC1)** Recrystallization from MeOH, white solid, 70% yield. <sup>1</sup>H NMR (600 MHz, CDCl<sub>3</sub>) δ 8.34 (d, *J* = 7.8 Hz, 2H), 8.01 (t, *J* = 7.8 Hz, 1H), 7.55 (d, *J* = 8.4 Hz, 2H), 4.01 (tdd, *J* = 12.3, 7.2, 4.0 Hz, 2H), 2.05 (dt, *J* = 8.6, 2.4 Hz, 4H), 1.77 (dq, *J* = 12.4, 4.1 Hz, 4H), 1.67 (ddd, *J* = 13.0, 6.3, 2.5 Hz, 2H), 1.47 (ddt, *J* = 11.4, 10.0, 3.5 Hz, 4H), 1.36 (ddd, *J* = 13.6, 10.6, 3.5 Hz, 4H), 1.31 – 1.25 (m, 2H). <sup>13</sup>C NMR (151 MHz, CDCl<sub>3</sub>) δ 162.47, 149.05, 138.95, 124.88, 48.23, 32.99, 25.56, 24.72. HRMS (ESI-TOF)  $m/z$  Calcd for  $C_{19}H_{28}N_3O_2^+$   $[M+H]^+$  330.2182, found 330.2183.

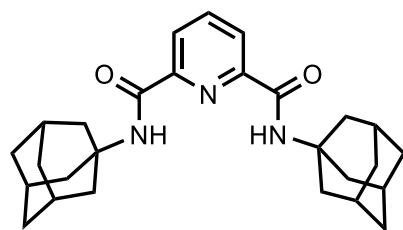

***N*<sup>2</sup>,*N*<sup>6</sup>-Di((1*s*,3*s*)-adamantan-1-yl)pyridine-2,6-dicarboxamide (TC2)** Purification by silica gel chromatography eluting with hexane/EA (70/30, v/v), white solid, 95% yield. <sup>1</sup>H NMR (600 MHz, CDCl<sub>3</sub>) δ 8.29 (d, *J* = 7.7 Hz, 2H), 7.99 (t, *J* = 7.8 Hz, 1H), 7.49 (s, 2H), 2.17 (d, *J* = 1.8 Hz, 18H), 1.79 – 1.73 (m, 12H). <sup>13</sup>C NMR (151 MHz, CDCl<sub>3</sub>) δ 162.06, 149.27, 138.99, 124.14, 51.68, 41.48, 36.35, 29.46. HRMS (ESI-TOF)  $m/z$  Calcd for  $C_{27}H_{36}N_3O_2^+$   $[M+H]^+$  434.2808, found 434.2807.

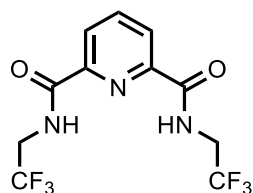

***N*<sup>2</sup>,*N*<sup>6</sup>-Bis(2,2,2-trifluoroethyl)pyridine-2,6-dicarboxamide (TC3)** Recrystallization from DCM/hexane, white solid, 77% yield. <sup>1</sup>H NMR (600 MHz, CDCl<sub>3</sub>) δ 8.45 (d, *J* = 7.8 Hz, 2H), 8.12 (t, *J* = 7.8 Hz, 1H), 7.87 (s, 2H), 4.20 (qd, *J* = 9.0, 6.7 Hz, 4H). <sup>13</sup>C NMR (151 MHz, CD<sub>3</sub>OD) δ 164.38, 147.62, 138.95, 124.06 (q, *J* = 278.3 Hz), 124.85, 39.85 (q, *J* = 35.1 Hz), 39.76 (q, *J* = 35.1 Hz). <sup>19</sup>F NMR (376 MHz, CDCl<sub>3</sub>) δ -74.79. HRMS (ESI-TOF) *m/z* Calcd for C<sub>11</sub>H<sub>10</sub>F<sub>6</sub>N<sub>3</sub>O<sub>2</sub><sup>+</sup> [M+H]<sup>+</sup> 330.0677, found 330.0682.

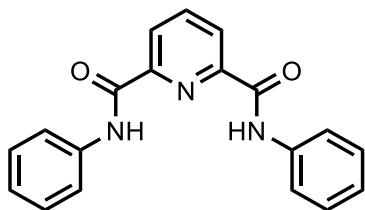

***N*<sup>2</sup>,*N*<sup>6</sup>-Diphenylpyridine-2,6-dicarboxamide (TC4)** Recrystallization from MeOH, white solid, 56% yield. <sup>1</sup>H NMR (600 MHz, Acetone-*d*<sub>6</sub>) δ 10.51 (s, 2H), 8.49 (d, *J* = 7.7 Hz, 2H), 8.34 (dd, *J* = 8.1, 7.4 Hz, 1H), 7.98 (dd, *J* = 8.7, 1.1 Hz, 4H), 7.42 (dd, *J* = 8.6, 7.4 Hz, 4H), 7.18 (tt, *J* = 7.4, 1.1 Hz, 2H). <sup>13</sup>C NMR (151 MHz, Acetone-*d*<sub>6</sub>) δ 160.91, 148.99, 139.29, 137.95, 128.25, 124.77, 123.72, 120.01. HRMS (ESI-TOF) *m/z* Calcd for C<sub>19</sub>H<sub>16</sub>N<sub>3</sub>O<sub>2</sub><sup>+</sup> [M+H]<sup>+</sup> 318.1243, found 318.1245.

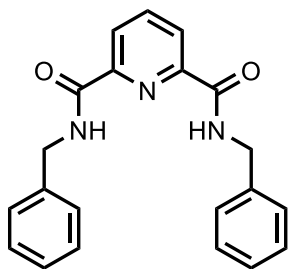

***N*<sup>2</sup>,*N*<sup>6</sup>-Dibenzylpyridine-2,6-dicarboxamide (TC5)** Purification by silica gel chromatography eluting with hexane/EA (50/50, v/v), white solid, 52% yield. <sup>1</sup>H NMR (600 MHz, Acetone-*d*<sub>6</sub>) δ 9.19 (s, 2H), 8.37 (d, *J* = 7.7 Hz, 2H), 8.24 (dd, *J* = 8.1, 7.4 Hz, 1H), 7.30 (d, *J* = 4.7 Hz, 8H), 7.25 – 7.20 (m, 2H), 4.59 (d, *J* = 6.5 Hz, 4H). <sup>13</sup>C NMR (151 MHz, Acetone-*d*<sub>6</sub>) δ 162.84, 148.83, 138.95, 138.79, 127.91, 126.79, 126.45, 124.16, 41.99. HRMS (ESI-TOF) *m/z* Calcd for C<sub>21</sub>H<sub>20</sub>N<sub>3</sub>O<sub>2</sub><sup>+</sup> [M+H]<sup>+</sup> 346.1556, found 346.1555.

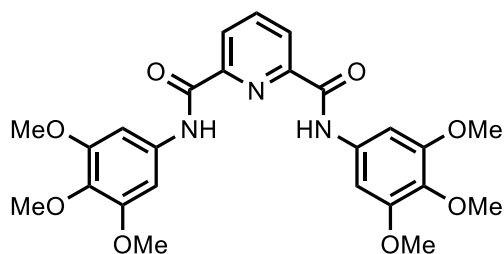

***N*<sup>2</sup>,*N*<sup>6</sup>-Bis(3,4,5-trimethoxyphenyl)pyridine-2,6-dicarboxamide (TC6)** Recrystallization from MeOH, white solid, 80% yield. <sup>1</sup>H NMR (600 MHz, Acetone-*d*<sub>6</sub>) δ 10.42 (s, 2H), 8.47 (d, *J* = 7.7 Hz, 2H), 8.34 (dd, *J* = 8.1, 7.3 Hz, 1H), 7.44 (s, 4H), 3.87 (s, 12H), 3.73 (s, 6H). <sup>13</sup>C NMR (151 MHz, Acetone-*d*<sub>6</sub>) δ 160.60, 152.94, 148.91, 139.42, 134.52, 133.87, 124.60, 97.72, 59.29, 54.96. HRMS (ESI-TOF) *m/z* Calcd for C<sub>25</sub>H<sub>28</sub>N<sub>3</sub>O<sub>8</sub><sup>+</sup> [M+H]<sup>+</sup> 498.1876, found 498.1867.

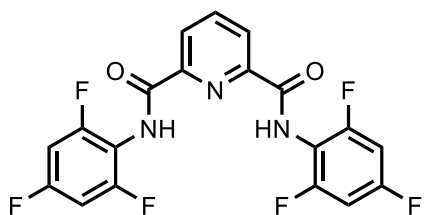

***N*<sup>2</sup>,*N*<sup>6</sup>-Bis(2,4,6-trifluorophenyl)pyridine-2,6-dicarboxamide (TC7)** Recrystallization from toluene, white solid, 85% yield. <sup>1</sup>H NMR (600 MHz, Acetone-*d*<sub>6</sub>) δ 10.20 (s, 2H), 8.51 (d, *J* = 7.8 Hz, 2H), 8.39 (dd, *J* = 8.2, 7.3 Hz, 1H), 7.12 (dd, *J* = 9.0, 7.6 Hz, 4H). <sup>13</sup>C NMR (151 MHz, Acetone-*d*<sub>6</sub>) δ 161.69, 159.94, 159.36 (dd, *J* = 15.7, 7.4 Hz), 157.70 (dd, *J* = 15.8, 7.6 Hz), 147.79, 139.65, 125.40, 100.90 – 99.71 (m). <sup>19</sup>F NMR (376 MHz, Acetone-*d*<sub>6</sub>) δ -112.75 (t, *J* = 5.7 Hz), -112.79 (t, *J* = 6.2 Hz), -118.00 (d, *J* = 5.5 Hz), -118.04 (d, *J* = 6.4 Hz). HRMS (ESI-TOF) *m/z* Calcd for C<sub>19</sub>H<sub>10</sub>F<sub>6</sub>N<sub>3</sub>O<sub>2</sub><sup>+</sup> [M+H]<sup>+</sup> 426.0677, found 426.0669.

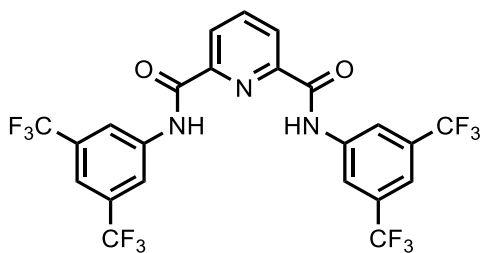

***N*<sup>2</sup>,*N*<sup>6</sup>-Bis(3,5-bis(trifluoromethyl)phenyl)pyridine-2,6-dicarboxamide (TC8)** Recrystallization from MeOH, white solid, 95% yield. <sup>1</sup>H NMR (600 MHz, Acetone-*d*<sub>6</sub>) δ 11.13 (s, 2H), 8.73 (s, 4H), 8.57 (d, *J* = 7.7 Hz, 2H), 8.44 (dd, *J* = 8.1, 7.3 Hz, 1H), 7.83 (dt, *J* = 1.6, 0.9 Hz, 2H). <sup>13</sup>C NMR (151 MHz, Acetone-*d*<sub>6</sub>) δ 161.56, 147.94, 139.87 (d, *J* = 33.6 Hz), 131.24

(q,  $J = 33.5$  Hz), 125.57, 123.07 (q,  $J = 271.8$  Hz), 119.83 – 119.52 (m), 117.16 – 115.69 (m).  $^{19}\text{F}$  NMR (376 MHz, Acetone- $d_6$ )  $\delta$  -61.04. HRMS (ESI-TOF)  $m/z$ . Calcd for  $\text{C}_{23}\text{H}_{12}\text{F}_3\text{N}_3\text{O}_2^+$   $[\text{M}+\text{H}]^+$  590.0738, found 590.0742.

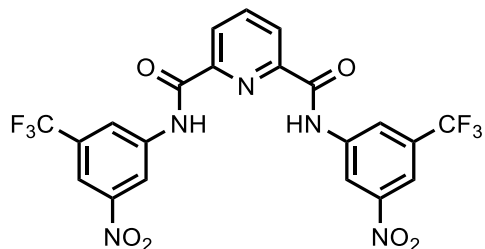

**$N^2,N^6$ -Bis(3-trifluoromethyl-5-nitrophenyl)pyridine-2,6-dicarboxamide (TC9)**

Recrystallization from MeOH, pale white solid, 96% yield.  $^1\text{H}$  NMR (600 MHz, Acetone- $d_6$ )  $\delta$  11.24 (s, 2H), 9.28 (s, 2H), 8.82 (s, 2H), 8.58 (d,  $J = 7.7$  Hz, 2H), 8.45 (t,  $J = 7.7$  Hz, 1H), 8.30 (s, 2H).  $^{13}\text{C}$  NMR (151 MHz, Acetone- $d_6$ )  $\delta$  161.74, 148.56, 147.864, 147.856, 140.08 (d,  $J = 24.2$  Hz), 131.20 (q,  $J = 33.6$  Hz), 125.75, 122.76 (q,  $J = 272.1$  Hz), 121.73 (q,  $J = 3.6$  Hz), 117.52, 114.73 (q,  $J = 4.1$  Hz).  $^{19}\text{F}$  NMR (376 MHz, Acetone- $d_6$ )  $\delta$  -61.01. HRMS (ESI-TOF)  $m/z$ . Calcd for  $\text{C}_{21}\text{H}_{12}\text{F}_6\text{N}_5\text{O}_6^+$   $[\text{M}+\text{H}]^+$  544.0692, found 544.0691.

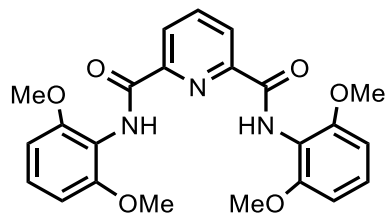

**$N^2,N^6$ -Bis(2,6-dimethoxyphenyl)pyridine-2,6-dicarboxamide (TC10)** Purification by silica gel chromatography eluting with hexane/EA (30/70, v/v), pale white solid, 90% yield.  $^1\text{H}$  NMR (600 MHz, Acetone- $d_6$ )  $\delta$  9.81 (s, 2H), 8.42 (d,  $J = 7.7$  Hz, 2H), 8.27 (dd,  $J = 8.1, 7.4$  Hz, 1H), 7.25 (t,  $J = 8.4$  Hz, 2H), 6.71 (d,  $J = 8.4$  Hz, 4H), 3.78 (s, 12H).  $^{13}\text{C}$  NMR (151 MHz, Acetone- $d_6$ )  $\delta$  161.19, 156.24, 149.20, 138.68, 127.52, 124.20, 114.23, 103.81, 54.89. HRMS (ESI-TOF)  $m/z$ . Calcd for  $\text{C}_{23}\text{H}_{24}\text{N}_3\text{O}_6^+$   $[\text{M}+\text{H}]^+$  438.1665, found 438.1660.



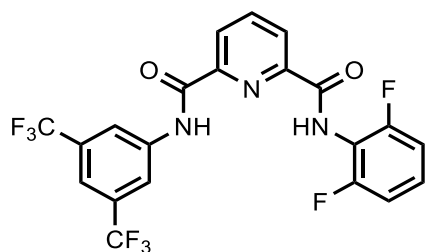

***N*<sup>2</sup>-(3,5-Bis(trifluoromethyl)phenyl)-*N*<sup>6</sup>-(2,6-difluorophenyl)pyridine-2,6-dicarboxamide**

(TC11) Recrystallization from MeOH, pale white solid, 82% yield. <sup>1</sup>H NMR (600 MHz, Acetone-*d*<sub>6</sub>) δ 10.93 (s, 1H), 10.07 (s, 1H), 8.57 (dd, *J* = 7.8, 1.2 Hz, 1H), 8.53 – 8.47 (m, 3H), 8.41 (t, *J* = 7.8 Hz, 1H), 7.82 – 7.76 (m, 1H), 7.46 (tt, *J* = 8.5, 6.2 Hz, 1H), 7.16 (t, *J* = 8.2 Hz, 2H). <sup>13</sup>C NMR (151 MHz, Acetone-*d*<sub>6</sub>) δ 161.75, 161.49, 159.09 (d, *J* = 4.9 Hz), 157.43 (d, *J* = 5.0 Hz), 148.06, 147.97, 139.73, 139.68, 131.98 – 130.00 (m), 128.42 (t, *J* = 10.0 Hz), 125.50 (d, *J* = 17.5 Hz), 123.01 (q, *J* = 272.0 Hz), 119.88 (q, *J* = 4.3 Hz), 116.62 (dt, *J* = 8.5, 4.2 Hz), 113.67 (t, *J* = 16.8 Hz), 111.36 (dd, *J* = 19.8, 4.4 Hz). <sup>19</sup>F NMR (376 MHz, Acetone-*d*<sub>6</sub>) δ -60.97, -116.09. HRMS (ESI-TOF) *m/z* Calcd for C<sub>21</sub>H<sub>12</sub>F<sub>8</sub>N<sub>3</sub>O<sub>2</sub><sup>+</sup> [M+H]<sup>+</sup> 490.0802, found 490.0801.

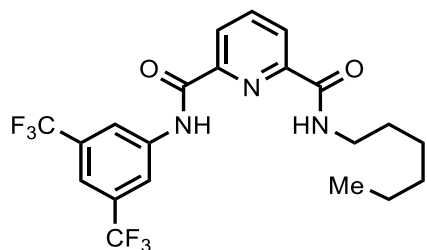

***N*<sup>2</sup>-(3,5-bis(trifluoromethyl)phenyl)-*N*<sup>6</sup>-hexylpyridine-2,6-dicarboxamide** (TC12)

Purification by silica gel chromatography eluting with hexane/EA (60/40, v/v), pale white solid, 92% yield. <sup>1</sup>H NMR (600 MHz, CDCl<sub>3</sub>) δ 9.93 (s, 1H), 8.50 (d, *J* = 7.7 Hz, 2H), 8.31 (s, 2H), 8.16 (t, *J* = 7.8 Hz, 1H), 7.90 (t, *J* = 6.2 Hz, 1H), 7.70 (s, 1H), 3.53 (q, *J* = 6.8 Hz, 2H), 1.66 (td, *J* = 14.3, 13.8, 6.7 Hz, 2H), 1.38 (t, *J* = 7.5 Hz, 2H), 1.31 (td, *J* = 3.9, 1.8 Hz, 4H), 0.89 (t, *J* = 6.8 Hz, 3H). <sup>13</sup>C NMR (151 MHz, CDCl<sub>3</sub>) δ 163.24, 161.80, 149.41, 147.89, 139.67, 138.76, 132.57 (d, *J* = 33.7 Hz), 126.17, 125.56, 123.06 (q, *J* = 272.9 Hz), 120.21 – 119.61 (m), 118.15 – 117.99 (m), 39.89, 31.47, 29.74, 26.77, 22.56, 13.97. <sup>19</sup>F NMR (376 MHz, CDCl<sub>3</sub>) δ -65.62. HRMS (ESI-TOF) *m/z* Calcd for C<sub>21</sub>H<sub>22</sub>F<sub>6</sub>N<sub>3</sub>O<sub>2</sub><sup>+</sup> [M+H]<sup>+</sup> 462.1616, found 462.1620.

## 2.2 Preparation and Determination Absolute Configuration of (S,S)-T25

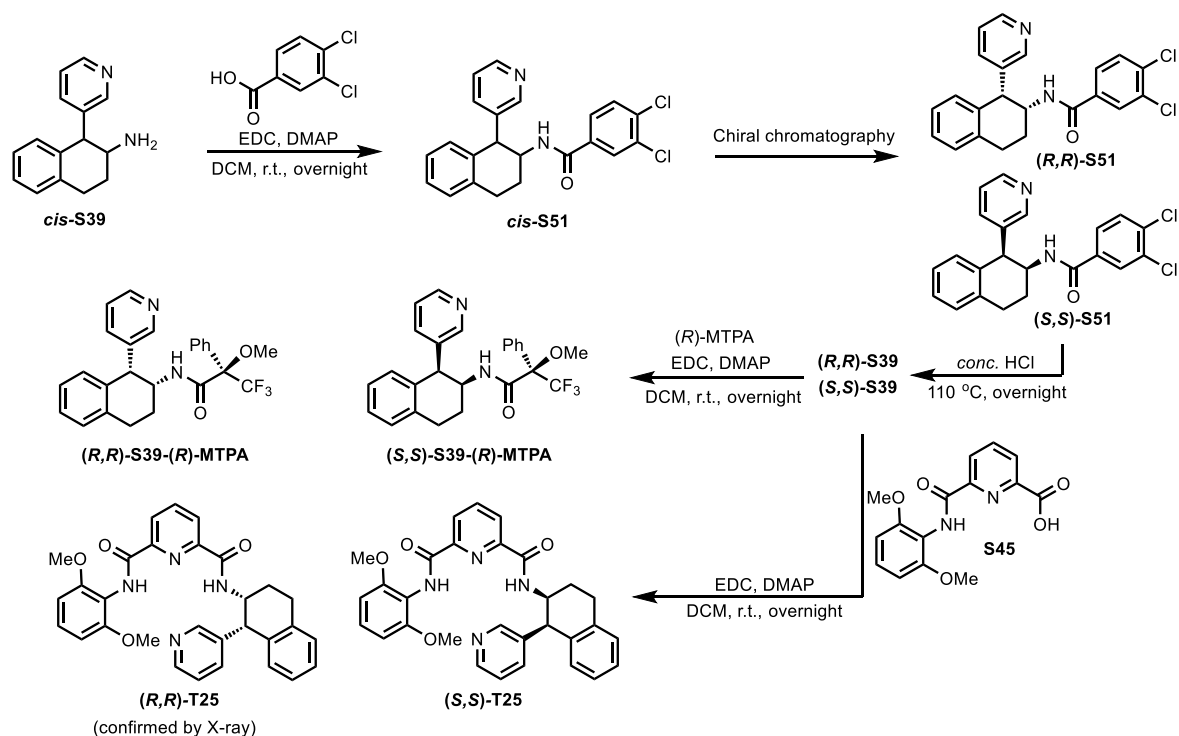

Following the procedure for synthesis of *cis*-T25 with *cis*-S39 and 3,4-dichlorobenzoic acid. Compound *cis*-S51 was obtained as a white solid.  $^1\text{H}$  NMR (600 MHz,  $\text{CDCl}_3$ )  $\delta$  8.41 (dd,  $J = 4.7, 1.7$  Hz, 1H), 8.26 (d,  $J = 2.3$  Hz, 1H), 7.75 (d,  $J = 2.0$  Hz, 1H), 7.47 (d,  $J = 8.3$  Hz, 1H), 7.42 (dd,  $J = 8.3, 2.1$  Hz, 1H), 7.22 (tt,  $J = 4.3, 1.7$  Hz, 3H), 7.17 (ddd,  $J = 7.8, 4.7, 0.9$  Hz, 1H), 7.12 (ddd,  $J = 7.7, 6.1, 2.6$  Hz, 1H), 6.92 (d,  $J = 8.1$  Hz, 1H), 5.72 (d,  $J = 8.1$  Hz, 1H), 4.72 – 4.67 (m, 1H), 4.66 (d,  $J = 5.7$  Hz, 1H), 3.18 – 3.08 (m, 2H), 1.92 – 1.84 (m, 2H).  $^{13}\text{C}$  NMR (151 MHz,  $\text{CDCl}_3$ )  $\delta$  164.78, 151.17, 148.21, 137.87, 137.17, 136.15, 135.87, 135.47, 134.10, 133.25, 130.81, 130.75, 129.23, 128.89, 127.18, 126.63, 125.82, 123.12, 49.17, 45.31, 28.36, 24.09. HRMS (ESI-TOF)  $m/z$  Calcd for  $\text{C}_{22}\text{H}_{19}\text{Cl}_2\text{N}_2\text{O}^+$   $[\text{M}+\text{H}]^+$  397.0874, found 397.0880.

(R,R)-S51 and (S,S)-S51 were separated by chiral chromatography on a chiralpak OD column (30% IPA/hexane, 6.0 mL/min). Retention time: 15 min [(R,R)-S51], 19 min [(S,S)-S51]. For (R,R)-S51,  $[\alpha]_D^{21} = +202.1$  ( $c$  0.1,  $\text{CHCl}_3$ ). For (S,S)-S51,  $[\alpha]_D^{21} = -168.1$  ( $c$  0.1,  $\text{CHCl}_3$ ).

**(R,R)-S39** and **(S,S)-S39** were prepared through treating **(R,R)-S51** and **(S,S)-S51** with *conc.* HCl at 110 °C for overnight. The reaction mixture was basified with 10% aqueous NaOH solution and extracted with EA. The crude products were used in the next step without further purification.

Following the procedure for synthesis of *cis*-**T25** with **(R,R)-S39** [or **(S,S)-S39**] and **S45**. Compounds **(R,R)-T25** and **(S,S)-T25** were obtained. If necessary, **(S,S)-T25** can be further purified through recrystallization from *i*PrOH to increase the ee value to > 99%. For **(R,R)-T25**,  $[\alpha]_D^{21} = +104.0$  (*c* 0.1, CHCl<sub>3</sub>). For **(S,S)-T25**,  $[\alpha]_D^{21} = -81.1$  (*c* 0.1, CHCl<sub>3</sub>).

Following the procedure for synthesis of *cis*-**T25** with **(R,R)-S39** [or **(S,S)-S39**] and Mosher reagent **(R)-MTPA**. Compounds **(R,R)-S39-(R)-MTPA** and **(S,S)-S39-(R)-MTPA** were obtained as colorless oil. For **(R,R)-S39-(R)-MTPA**, <sup>1</sup>H NMR (600 MHz, CDCl<sub>3</sub>) δ 8.50 (dd, *J* = 4.8, 1.7 Hz, 1H), 8.32 (d, *J* = 2.0 Hz, 1H), 7.46 (dd, *J* = 6.5, 2.8 Hz, 2H), 7.42 – 7.36 (m, 3H), 7.33 (dt, *J* = 7.9, 2.1 Hz, 1H), 7.22 (ddd, *J* = 7.8, 4.8, 0.9 Hz, 1H), 7.21 – 7.16 (m, 2H), 7.11 – 7.08 (m, 1H), 6.90 (d, *J* = 7.6 Hz, 1H), 6.53 (d, *J* = 8.6 Hz, 1H), 4.60 – 4.55 (m, 1H), 4.53 (d, *J* = 5.7 Hz, 1H), 3.24 (q, *J* = 1.5 Hz, 3H), 3.10 – 3.01 (m, 2H), 1.92 – 1.86 (m, 1H), 1.84 – 1.79 (m, 1H). <sup>13</sup>C NMR (151 MHz, CDCl<sub>3</sub>) δ 165.72, 151.43, 148.32, 137.98, 136.75, 136.04, 135.38, 132.26, 130.65, 129.52, 128.86, 128.67, 127.58 (q, *J* = 1.3 Hz), 127.08, 126.56, 123.85 (q, *J* = 221.4 Hz), 123.06, 83.91 (q, *J* = 26.0 Hz), 54.92 (q, *J* = 2.1 Hz), 48.69, 45.76, 28.08, 24.43. <sup>19</sup>F NMR (376 MHz, CDCl<sub>3</sub>) δ -70.73. HRMS (ESI-TOF) *m/z* Calcd for C<sub>25</sub>H<sub>24</sub>F<sub>3</sub>N<sub>2</sub>O<sub>2</sub><sup>+</sup> [M+H]<sup>+</sup> 441.1790, found 441.1792.  $[\alpha]_D^{21} = +173.5$  (*c* 0.1, CHCl<sub>3</sub>). For **(S,S)-S39-(R)-MTPA**, <sup>1</sup>H NMR (600 MHz, CDCl<sub>3</sub>) δ 8.45 (dd, *J* = 4.7, 1.8 Hz, 1H), 8.15 (d, *J* = 2.1 Hz, 1H), 7.50 (td, *J* = 6.3, 5.1, 3.0 Hz, 2H), 7.49 – 7.43 (m, 3H), 7.22 – 7.18 (m, 2H), 7.10 – 7.07 (m, 1H), 7.03 (ddd, *J* = 7.9, 4.7, 0.9 Hz, 1H), 7.00 (dt, *J* = 7.9, 2.0 Hz, 1H), 6.84 (d, *J* = 7.8 Hz, 1H), 6.40 (d, *J* = 8.7 Hz, 1H), 4.63 – 4.58 (m, 1H), 4.38 (d, *J* = 5.6 Hz, 1H), 3.31 (t, *J* = 1.6 Hz, 3H), 3.11 – 3.05 (m, 2H), 1.91 – 1.87 (m, 2H). <sup>13</sup>C NMR (151 MHz, CDCl<sub>3</sub>) δ 165.51, 151.25, 148.16, 137.89, 136.79, 135.73, 135.56, 132.27, 130.50, 129.56, 128.97, 128.71, 127.52 (q, *J* = 1.3 Hz), 127.14, 126.53, 123.63 (q, *J* = 221.0 Hz), 123.05, 83.73, 54.89 (q, *J* = 1.5 Hz), 48.30, 45.80, 27.90, 24.63. <sup>19</sup>F NMR (376 MHz, CDCl<sub>3</sub>) δ -71.39. HRMS (ESI-TOF) *m/z* Calcd for C<sub>25</sub>H<sub>24</sub>F<sub>3</sub>N<sub>2</sub>O<sub>2</sub><sup>+</sup> [M+H]<sup>+</sup> 441.1790, found 441.1792.  $[\alpha]_D^{21} = -129.2$  (*c* 0.1, CHCl<sub>3</sub>).

## Mosher's method analysis:

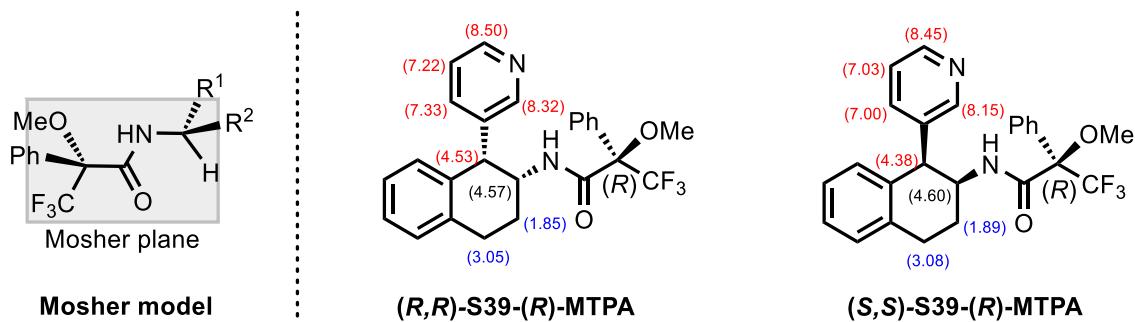

Considering Mosher's model, the protons in the R<sup>2</sup> of the molecule are shifted upfield relative to the protons in the R<sup>1</sup>, which is the result of anisotropic shielding of the phenyl group. In **(R,R)-S39-(R)-MTPA**, the pyridine portion is *trans* to the phenyl group. In **(S,S)-S39-(R)-MTPA**, the pyridine portion is *cis* to the phenyl group. Therefore, the absolute configurations of all derivatives are confirmed. These configurations are also confirmed by the X-ray of **(R,R)-T25**.

## Chiral SFC spectra:

The enantiomeric purities of *cis*-S51, **(R,R)**-S51 and **(S,S)**-S51 were determined by SFC analysis on a Chiralpak OD column (30% IPA/CO<sub>2</sub>, 3.0 mL/min). The enantiomeric purities of *cis*-T25, **(R,R)**-T25 and **(S,S)**-T25 were analyzed on a Waters UPC2 SFC with a Phenomenex CEL1 column (3 μm, 4.6 x 250 mm) under isocratic conditions (3.3 mL/min, 40% IPA/CO<sub>2</sub>, 1600 psi backpressure) at 30 °C.

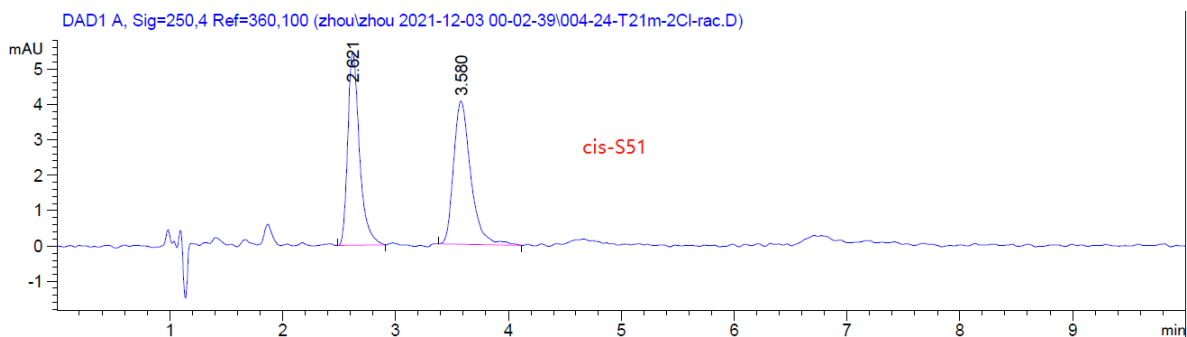

| Peak # | RetTime [min] | Type | Width [min] | Area [mAU*s] | Height [mAU] | Area %  |
|--------|---------------|------|-------------|--------------|--------------|---------|
| 1      | 2.621         | BB   | 0.1101      | 39.30210     | 5.45293      | 47.8904 |
| 2      | 3.580         | BB   | 0.1594      | 42.76466     | 4.04414      | 52.1096 |

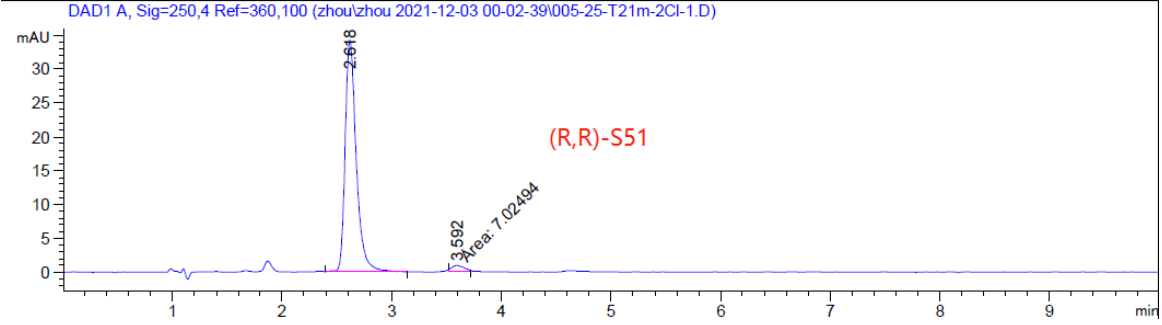

| Peak # | RetTime [min] | Type | Width [min] | Area [mAU*s] | Height [mAU] | Area %  |
|--------|---------------|------|-------------|--------------|--------------|---------|
| 1      | 2.618         | BB   | 0.1081      | 240.23790    | 34.13319     | 97.1589 |
| 2      | 3.592         | MM   | 0.1316      | 7.02494      | 8.89742e-1   | 2.8411  |

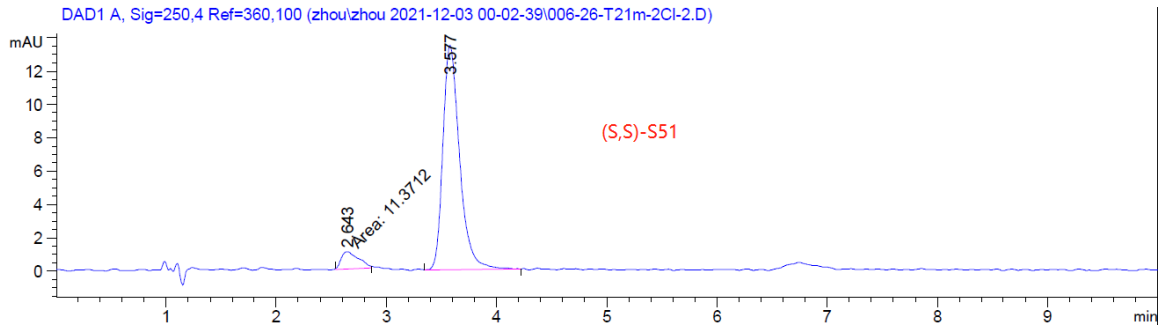

| Peak # | RetTime [min] | Type | Width [min] | Area [mAU*s] | Height [mAU] | Area %  |
|--------|---------------|------|-------------|--------------|--------------|---------|
| 1      | 2.643         | MM   | 0.1825      | 11.37122     | 1.03864      | 7.4439  |
| 2      | 3.577         | BB   | 0.1606      | 141.38776    | 13.45976     | 92.5561 |

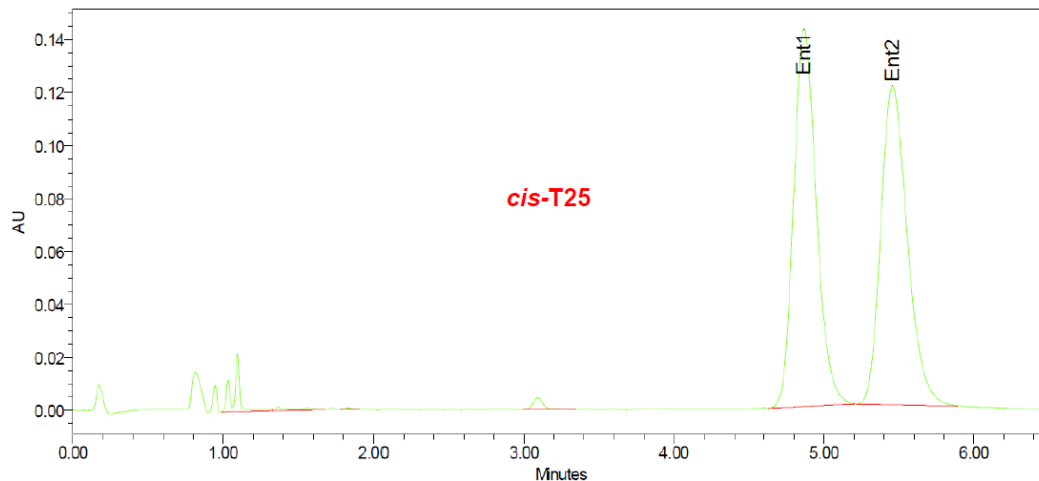

|   | Channel Name | Name | RT   | Area    | Height (μV) | ent1  | ent2  | ee   |
|---|--------------|------|------|---------|-------------|-------|-------|------|
| 1 | UV213        |      | 1.10 | 65920   | 22023       | 50.38 | 49.62 | 0.76 |
| 2 | UV213        |      | 1.37 | 7952    | 1589        | 50.38 | 49.62 | 0.76 |
| 3 | UV213        |      | 1.56 | 3918    | 814         | 50.38 | 49.62 | 0.76 |
| 4 | UV213        |      | 1.83 | 2572    | 692         | 50.38 | 49.62 | 0.76 |
| 5 | UV213        |      | 3.09 | 22161   | 4417        | 50.38 | 49.62 | 0.76 |
| 6 | UV213        | Ent1 | 4.87 | 1504957 | 142589      | 50.38 | 49.62 | 0.76 |
| 7 | UV213        | Ent2 | 5.46 | 1482311 | 120630      | 50.38 | 49.62 | 0.76 |

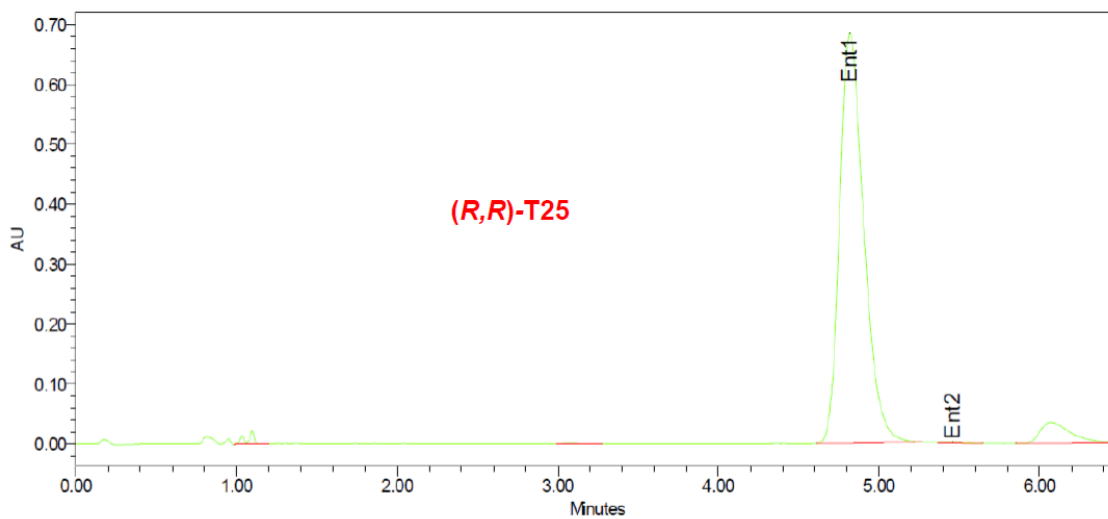

|   | Channel Name | Name | RT   | Area    | Height (μV) | ent1  | ent2 | ee    |
|---|--------------|------|------|---------|-------------|-------|------|-------|
| 1 | UV213        |      | 1.10 | 62292   | 21833       | 99.88 | 0.12 | 99.76 |
| 2 | UV213        |      | 3.08 | 7424    | 1270        | 99.88 | 0.12 | 99.76 |
| 3 | UV213        | Ent1 | 4.82 | 7176859 | 684004      | 99.88 | 0.12 | 99.76 |
| 4 | UV213        | Ent2 | 5.46 | 8669    | 892         | 99.88 | 0.12 | 99.76 |
| 5 | UV213        |      | 6.07 | 463495  | 35044       | 99.88 | 0.12 | 99.76 |

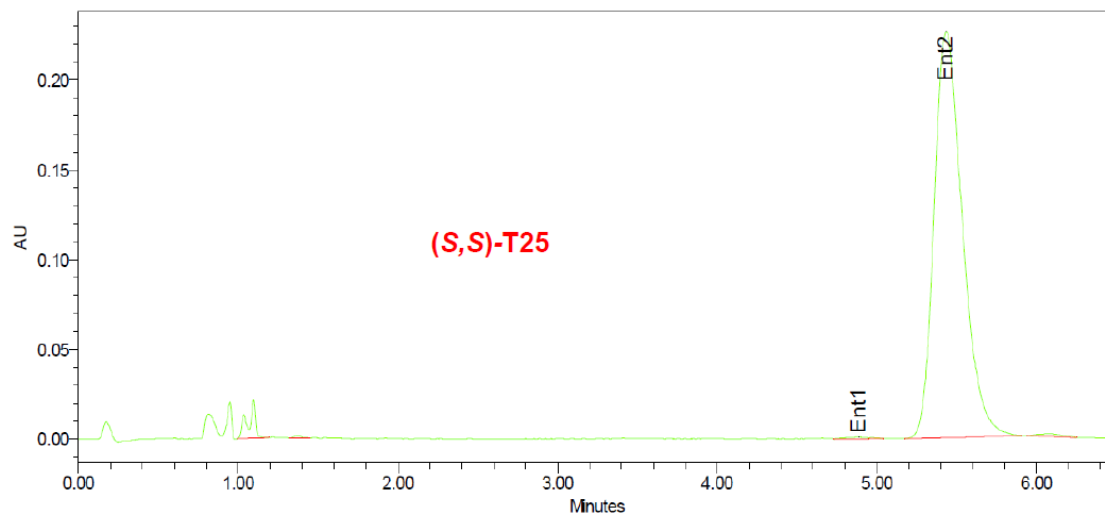

|   | Channel Name | Name | RT   | Area    | Height (μV) | ent1 | ent2  | ee     |
|---|--------------|------|------|---------|-------------|------|-------|--------|
| 1 | UV213        |      | 1.10 | 66545   | 21282       | 0.36 | 99.64 | -99.29 |
| 2 | UV213        |      | 1.37 | 4264    | 1485        | 0.36 | 99.64 | -99.29 |
| 3 | UV213        | Ent1 | 4.89 | 9985    | 1015        | 0.36 | 99.64 | -99.29 |
| 4 | UV213        | Ent2 | 5.43 | 2788992 | 226026      | 0.36 | 99.64 | -99.29 |
| 5 | UV213        |      | 6.07 | 15320   | 1579        | 0.36 | 99.64 | -99.29 |

## 2.3 Condition Optimization and Template Chaperone Role

### (a) Condition Optimization

Screening reactions were carried out on 0.02 mmol scale. Yield was based on  $^1\text{H}$  NMR analysis using 1,3,5-trimethoxybenzene as the internal standard. Selectivity was based on  $^1\text{H}$  NMR, GC-MS and LC-MS analysis. The yield of single target product is shown in tables.

**Table S1.** Template optimization for C6-selective C–H olefination of quinoline

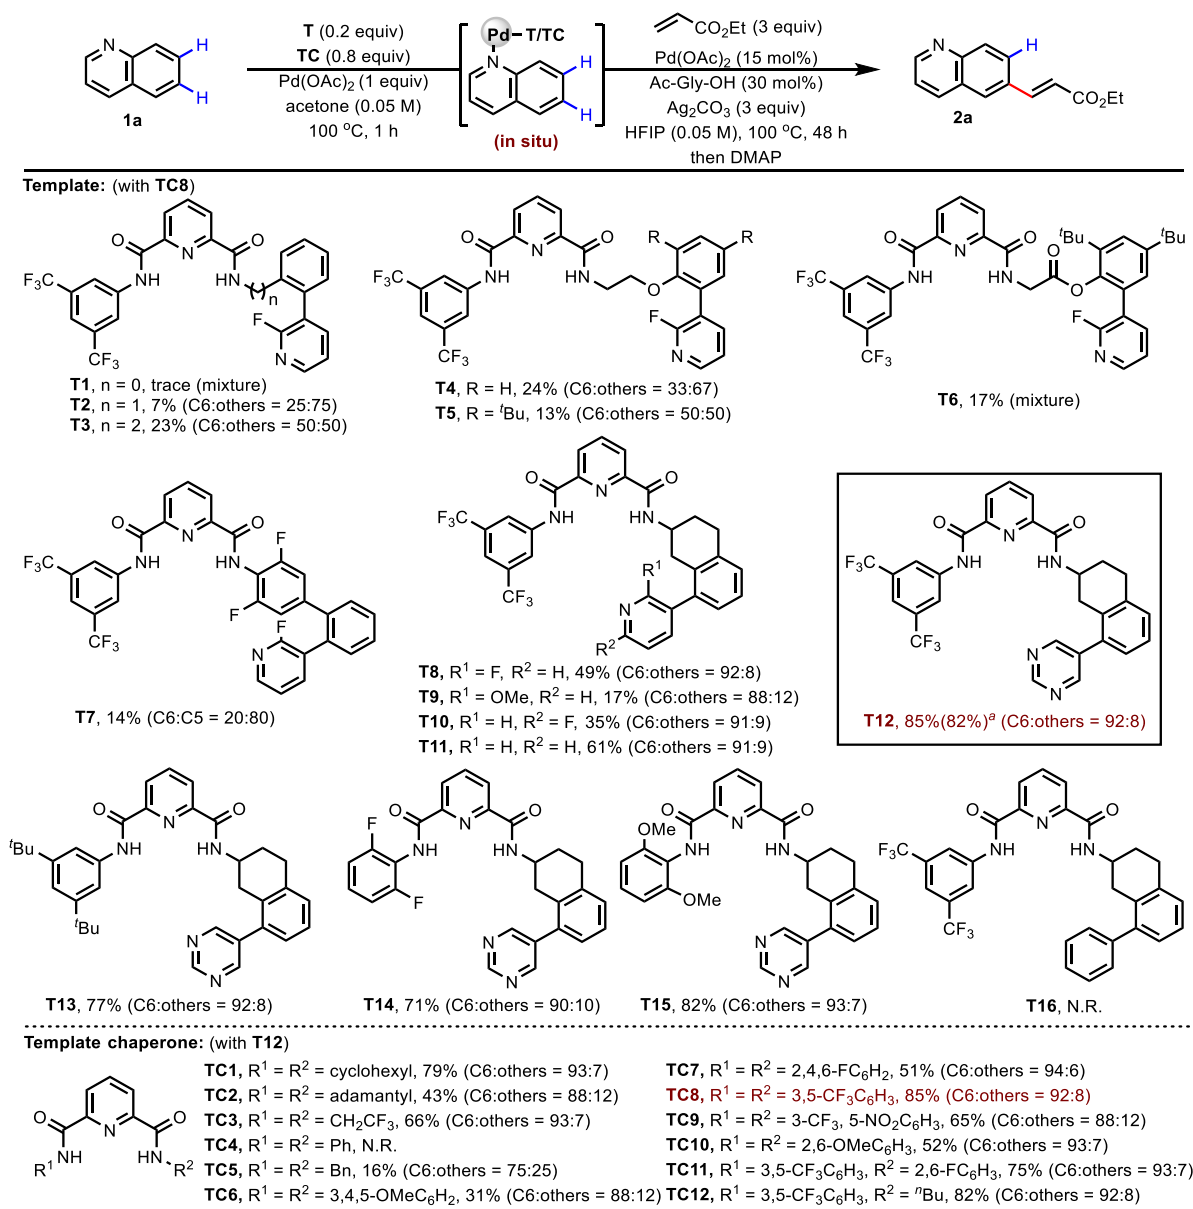

<sup>a</sup>Isolated yield on 0.1 mmol scale.



**Table S2.** Condition optimization for C6-selective C–H olefination of quinoline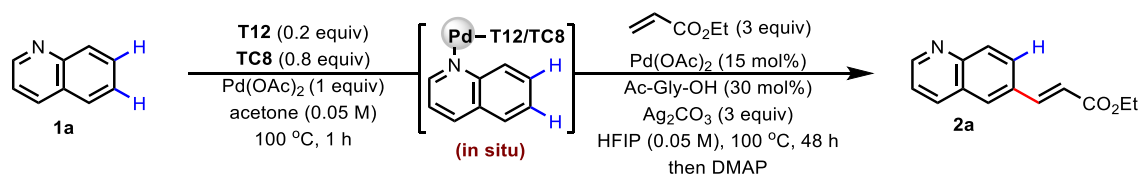

| Entry | Deviation from standard conditions                                                            | Yield (%),<br>Selectivity (C6:others) |
|-------|-----------------------------------------------------------------------------------------------|---------------------------------------|
| 1     | none                                                                                          | 85, (92:8)                            |
| 2     | <b>T12</b> (1 equiv), <i>w/o</i> <b>TC8</b>                                                   | 84, (92:8)                            |
| 3     | <b>TC8</b> (1 equiv), <i>w/o</i> <b>T12</b>                                                   | N.R., (-)                             |
| 4     | Pd(OAc) <sub>2</sub> (0.2 equiv) in 1 <sup>st</sup> step, <i>w/o</i> <b>TC8</b>               | 27, (83:17)                           |
| 5     | DCM instead of acetone                                                                        | 75, (92:8)                            |
| 6     | MeCN instead of acetone                                                                       | 80, (92:8)                            |
| 7     | <i>w/o</i> Pd(OAc) <sub>2</sub> in 2 <sup>nd</sup> step                                       | N.R., (-)                             |
| 8     | <i>w/o</i> Ac-Gly-OH                                                                          | 9, (67:33)                            |
| 9     | <i>w/o</i> Ag <sub>2</sub> CO <sub>3</sub>                                                    | 48, (90:10)                           |
| 10    | Pd(MeCN) <sub>2</sub> Cl <sub>2</sub> instead of Pd(OAc) <sub>2</sub> in 2 <sup>nd</sup> step | 60, (89:11)                           |
| 11    | Ac- <i>L</i> -Phe-OH instead of Ac-Gly-OH                                                     | 41, (90:10)                           |
| 12    | TFA-Gly-OH instead of Ac-Gly-OH                                                               | 25, (87:13)                           |
| 13    | Formyl-Gly-OH instead of Ac-Gly-OH                                                            | 62, (93:7)                            |
| 14    | AgOAc instead of Ag <sub>2</sub> CO <sub>3</sub>                                              | 70, (91:9)                            |
| 15    | Cu(OAc) <sub>2</sub> instead of Ag <sub>2</sub> CO <sub>3</sub>                               | 27, (80:20)                           |

**Table S3.** Template optimization for C7-selective C–H olefination of 3-methylquinoline

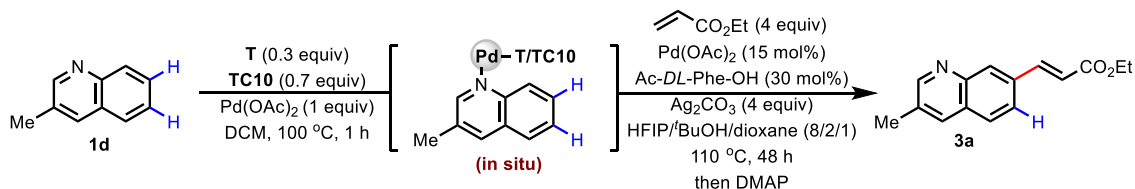

Template: (with TC10)

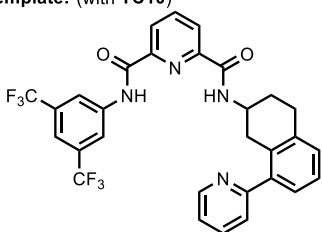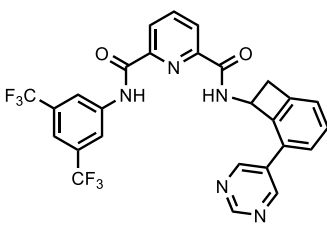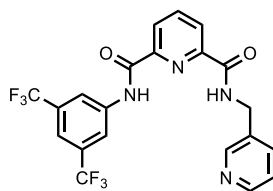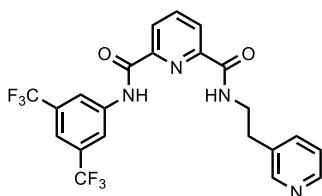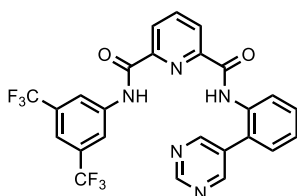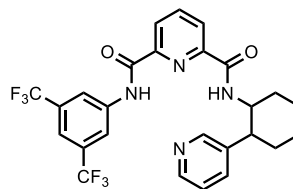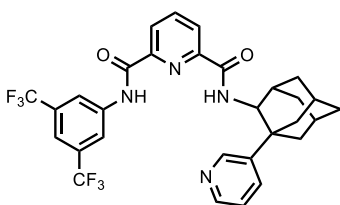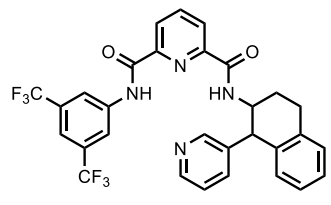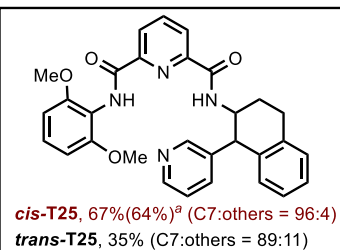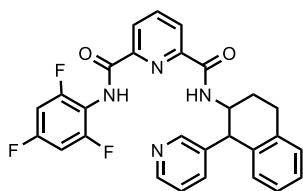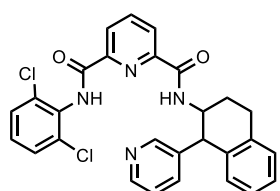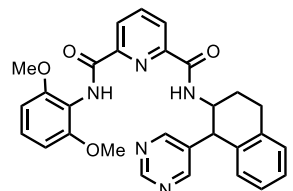

<sup>a</sup>Isolated yield on 0.05 mmol scale.

**Table S4.** Condition optimization for C7-selective C–H olefination of 3-methylquinoline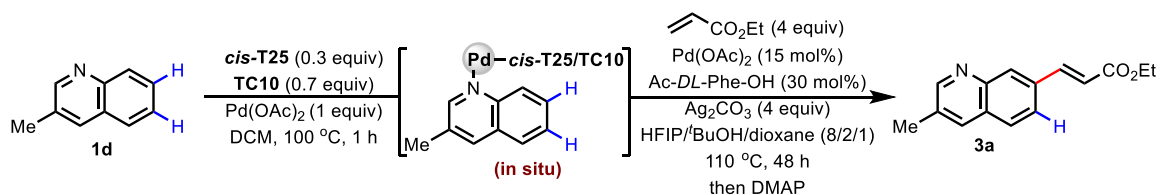

| Entry | Deviation from standard conditions                                                            | Yield (%),<br>Selectivity (C7:others) |
|-------|-----------------------------------------------------------------------------------------------|---------------------------------------|
| 1     | none                                                                                          | 67, (96:4)                            |
| 2     | <i>cis</i> -T25 (1 equiv), w/o TC10                                                           | 60, (96:4)                            |
| 3     | TC10 (1 equiv), w/o <i>cis</i> -T25                                                           | N.R., (-)                             |
| 4     | Pd(OAc) <sub>2</sub> (0.3 equiv) in 1 <sup>st</sup> step, w/o TC10                            | 33, (84:16)                           |
| 5     | acetone instead of DCM                                                                        | 53, (96:4)                            |
| 6     | MeCN instead of DCM                                                                           | 56, (94:6)                            |
| 7     | w/o Pd(OAc) <sub>2</sub> in 2 <sup>nd</sup> step                                              | N.R., (-)                             |
| 8     | w/o Ac-DL-Phe-OH                                                                              | N.R., (-)                             |
| 9     | w/o Ag <sub>2</sub> CO <sub>3</sub>                                                           | 6, (96:4)                             |
| 10    | Pd(MeCN) <sub>2</sub> Cl <sub>2</sub> instead of Pd(OAc) <sub>2</sub> in 2 <sup>nd</sup> step | 39, (94:6)                            |
| 11    | Ac-Gly-OH instead of Ac-DL-Phe-OH                                                             | 30, (89:11)                           |
| 12    | Ac-L-Phe-OH instead of Ac-DL-Phe-OH                                                           | 53, (96:4)                            |
| 13    | Ac-D-Phe-OH instead of Ac-DL-Phe-OH                                                           | 56, (96:4)                            |
| 14    | AgOAc instead of Ag <sub>2</sub> CO <sub>3</sub>                                              | 40, (94:6)                            |
| 15    | Cu(OAc) <sub>2</sub> instead of Ag <sub>2</sub> CO <sub>3</sub>                               | 5, (-)                                |
| 16    | HFIP instead of solvent mixture                                                               | 39, (96:4)                            |
| 17    | <sup>t</sup> BuOH instead of solvent mixture                                                  | 48, (96:4)                            |
| 18    | dioxane instead of solvent mixture                                                            | 10, (96:4)                            |
| 19    | HFIP/ <sup>t</sup> BuOH (4/1) instead of solvent mixture                                      | 32, (96:4)                            |

**Table S5.** Condition optimization for C7-selective C–H olefination of quinoline

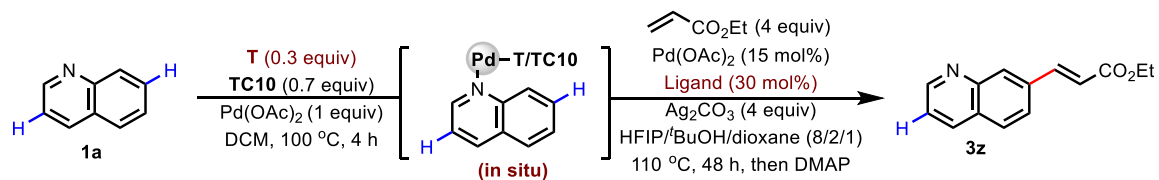

w/ Ac-L-Phe-OH

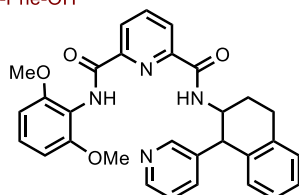

*cis*-T25, 28% (C7:C3 = 50:50, mono:di = 67:33)<sup>a</sup>

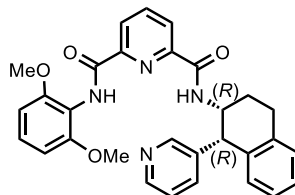

(*R,R*)-T25, 31% (C7:C3 = 50:50, mono:di = 50:50)

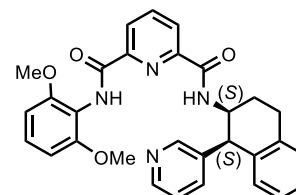

(*S,S*)-T25, 42% (C7:C3 = 88:12)

w/ (*S,S*)-T25

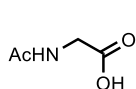

(Ac-Gly-OH)

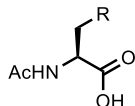

R = Cy, 46% (C7:C3 = 86:14)

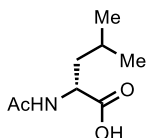

(Ac-D-Leu-OH)

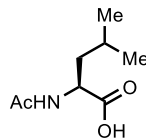

(Ac-L-Leu-OH)

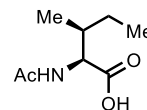

(Ac-L-Ile-OH)

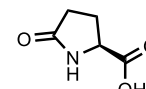

(L-pGlu-OH)

20% (C7:C3 = 50:50)

R = <sup>t</sup>Bu, 10% (C7:C3 = 67:33)

29% (C7:C3 = 50:50)

(mono:di = 50:50)

55% (C7:C3 = 88:12)

54% (C7:C3 = 90:10)<sup>b</sup>

43% (C7:C3 = 86:14)

8% (C7:C3 = 25:75)

<sup>a</sup>Di-product represents both C3 and C7-olefinated quinoline. <sup>b</sup>Using Pd(MeCN)<sub>2</sub>Cl<sub>2</sub>.

**Table S6.** Condition optimization for C6-selective C–H alkylation of quinoline

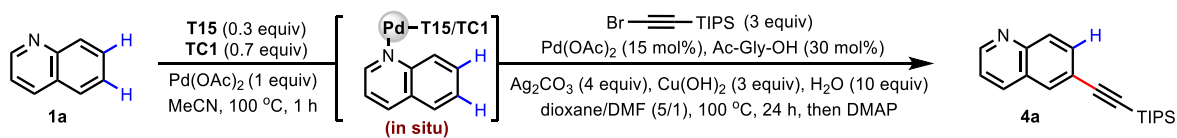

| Entry | Deviation from standard conditions                                                            | Yield (%),<br>Selectivity (C6:others) |
|-------|-----------------------------------------------------------------------------------------------|---------------------------------------|
| 1     | none                                                                                          | 72(66) <sup>a</sup> , (96:4)          |
| 2     | w/o Pd(OAc) <sub>2</sub> in 2 <sup>nd</sup> step                                              | N.R., (-)                             |
| 3     | w/o Ac-Gly-OH                                                                                 | 7, (-)                                |
| 4     | w/o Ag <sub>2</sub> CO <sub>3</sub>                                                           | 9, (92:8)                             |
| 5     | w/o Cu(OH) <sub>2</sub>                                                                       | 23, (90:10)                           |
| 6     | w/o H <sub>2</sub> O                                                                          | 64, (96:4)                            |
| 7     | w/o DMF                                                                                       | 67, (96:4)                            |
| 8     | Pd(MeCN) <sub>2</sub> Cl <sub>2</sub> instead of Pd(OAc) <sub>2</sub> in 2 <sup>nd</sup> step | 33, (96:4)                            |
| 9     | Cu(OAc) <sub>2</sub> instead of Cu(OH) <sub>2</sub>                                           | 30, (89:11)                           |
| 10    | Cu <sub>2</sub> O instead of Cu(OH) <sub>2</sub>                                              | 28, (88:12)                           |
| 11    | HFIP instead of standard solvent                                                              | N.R., (-)                             |

<sup>a</sup>Isolated yield on 0.1 mmol scale.

**Table S7.** Condition optimization for C6-selective C–H allylation of quinoline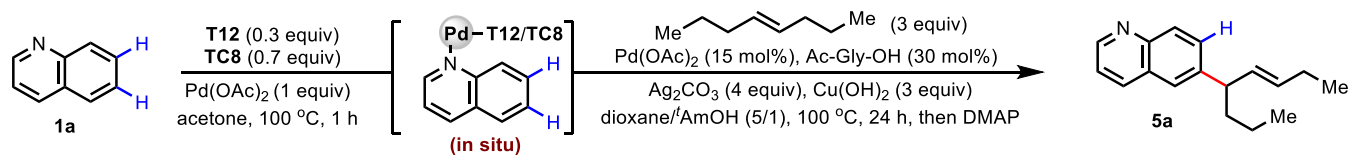

| Entry | Deviation from standard conditions               | Yield (%),<br>Selectivity (C6:others) |
|-------|--------------------------------------------------|---------------------------------------|
| 1     | none                                             | 76(75) <sup>a</sup> , (91:9)          |
| 2     | w/o Pd(OAc) <sub>2</sub> in 2 <sup>nd</sup> step | N.R., (-)                             |
| 3     | w/o Ac-Gly-OH                                    | N.R., (-)                             |
| 4     | w/o Ag <sub>2</sub> CO <sub>3</sub>              | 41, (91:9)                            |
| 5     | w/o Cu(OH) <sub>2</sub>                          | 33, (90:10)                           |
| 6     | w/o <sup>t</sup> AmOH                            | 52, (91:9)                            |
| 7     | <b>T15/TC10</b> instead of <b>T12/TC8</b>        | 66, (91:9)                            |
| 8     | Cu <sub>2</sub> O instead of Cu(OH) <sub>2</sub> | 41, (90:10)                           |
| 9     | dioxane/HFIP (5/1) instead of solvent mixture    | 39, (85:15)                           |

<sup>a</sup>Isolated yield on 0.1 mmol scale.

## (b) Template Chaperone Role

A key challenge in executing the remote functionalization of azine-containing heterocycles is the deleterious binding effect of the azine nitrogen to the active Pd catalyst. Our initial report on the non-covalent template (**T**)-mediated C5–H olefination required a stoichiometric loading of the Pd-containing **T** complex to mask the azine nitrogen, as well as to enable **T** to direct the Pd catalyst to the appropriate site. In this manuscript, we found that the loading of **T** could be reduced by using a much simpler template chaperone (**TC**).

We propose the following role and catalytic cycle of template (**T**) in the presence of **TC**. Substrate-**T** complex is the only competent species capable of recruiting the Pd catalyst and directing it to the required site (C6 or C7). Upon reaction, product-**T** complex is proposed to form, which undergoes template exchange with another substrate-**TC** complex to regenerate the competent substrate-**T** species for the next C–H activation catalytic cycle. In addition to statistical effects, we hypothesize that product-**T**/substrate-**TC** turnover is also promoted by increased steric hindrance from the functionalized product, disfavoring product binding to **T** relative to the substrate-**T**. In addition, the sum of **T** and **TC** loading enables all substrate azine nitrogens to be suitably masked to mitigate catalyst poisoning, enabling the active Pd catalyst to carry out the required activation and functionalization steps.

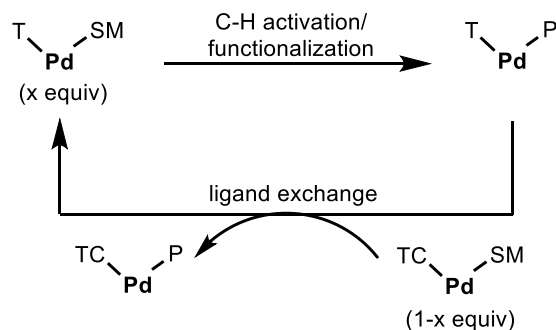

SM, starting material; T, template; TC, template chaperone; P, product

## 2.4 General Procedure for C6-Selective C–H Olefination

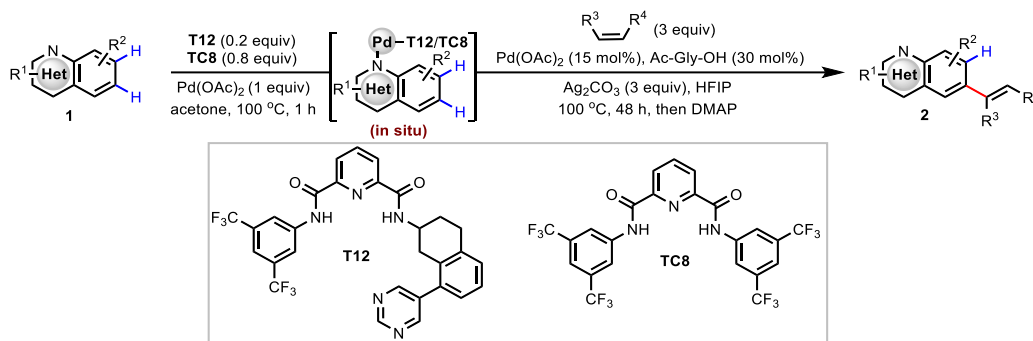

A pressure resistant reaction vial was charged with bicyclic aza-arene (0.1 mmol), **T12** (11.7 mg, 0.02 mmol), **TC8** (47.1 mg, 0.08 mmol), Pd(OAc)<sub>2</sub> (22.5 mg, 0.1 mmol) and acetone (2 mL). The reaction mixture was stirred at 100 °C for 1 h [Caution: A blast shield was used to mitigate the potential risk of an explosion; we note that in our hands this never occurred] then concentrated *in vacuo*. Pd(OAc)<sub>2</sub> (3.4 mg, 0.015 mmol), Ac-Gly-OH (3.5 mg, 0.03 mmol), Ag<sub>2</sub>CO<sub>3</sub> (82.7 mg, 0.3 mmol), HFIP (2 ml), and olefin (0.3 mmol) were added in the reaction vial. The vial was capped and allowed to stir at 100 °C for 48 h (600 – 1200 rpm). After cooling to room temperature, a solution of DMAP (36.7 mg, 0.3 mmol) in toluene (1 mL) and **TC8** (23.5 mg, 0.04 mmol) was added [Note: If the product release is incomplete, more DMAP should be added]. The mixture was stirred at 100 °C for 30 min. Upon completion, the mixture was passed through a short pad of Celite, washed with DCM, and concentrated. A portion of the sample was passed through a short pad of silica (in the glass dropper) using EA as the eluent to give the product mixture for determining the site-selectivity by <sup>1</sup>H NMR analysis. The remaining material and the sample for analysis were combined and purified by a preparative TLC to afford the product **2** and **TC-Pd-DMAP** complex.

### Graphical Procedure for C6-Selective C–H Olefination

Representative example of preparation of **2a** (0.1 mmol scale)



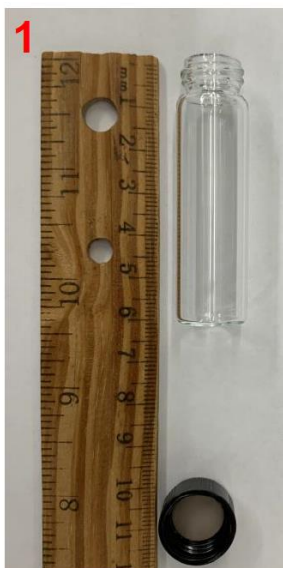

1  
Fisherbrand™ class B clear glass threaded vial.  
Volume: 7.4 mL; length: 60 mm.  
Fisher Catalog No. 03-338C.

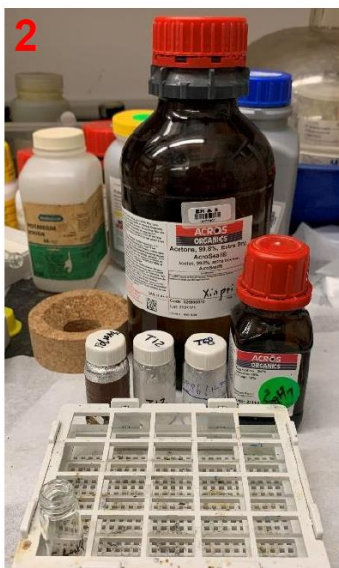

2  
DWK life sciences Wheaton™ black phenolic screw cap.  
Mfr: W240822  
Fisher Catalog No. 02-927-102

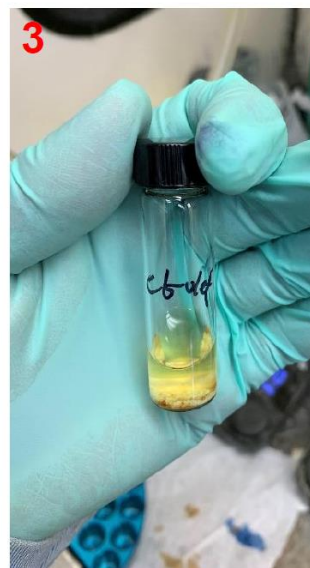

**Step 1 to 3: Reaction set up for template complexation.**

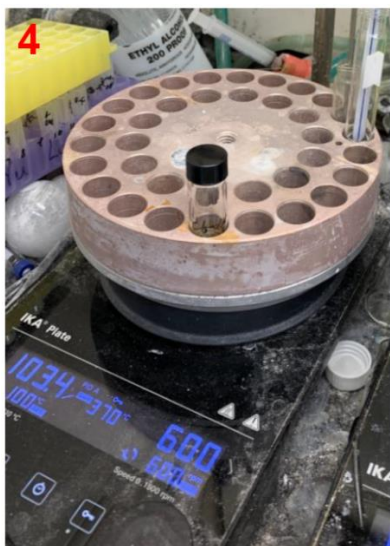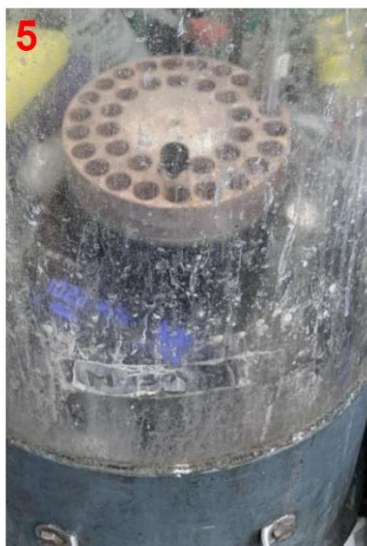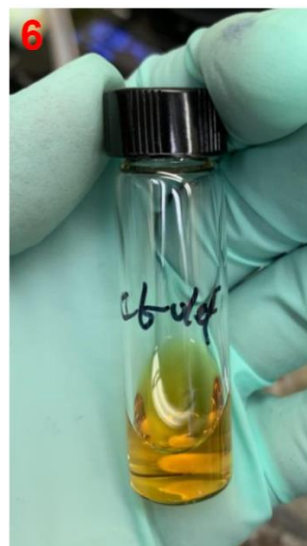

**Step 4 to 6: Preparation of template complexation at 100 °C. A blast shield was used for safety. The resulting solution is shown in 6.**

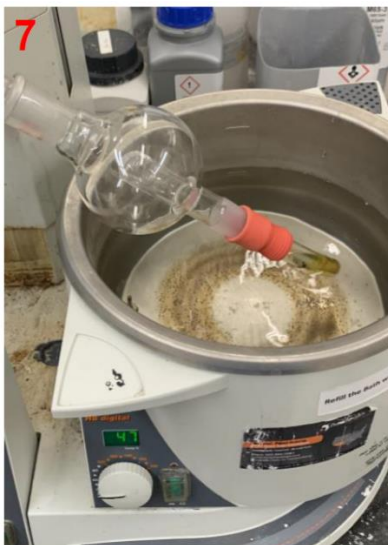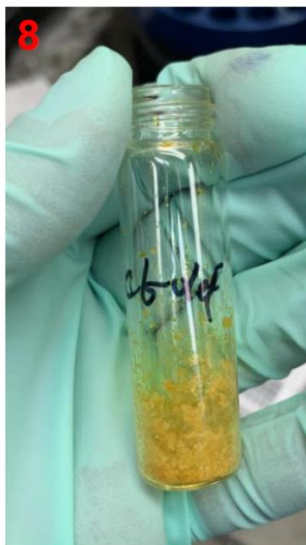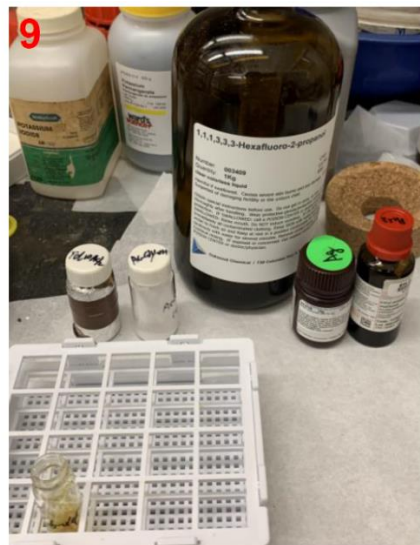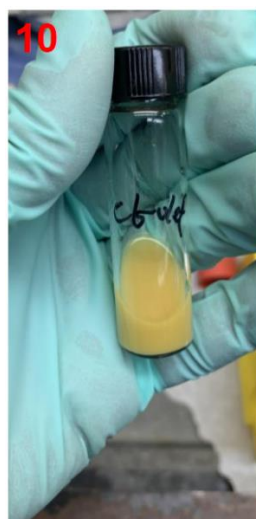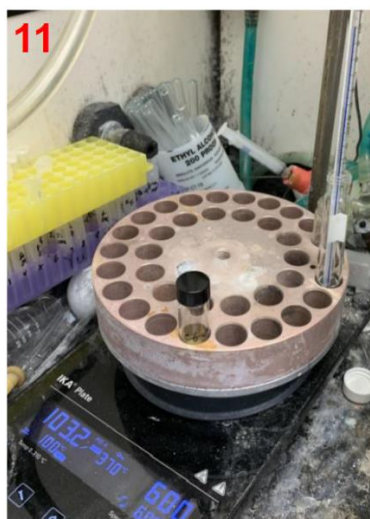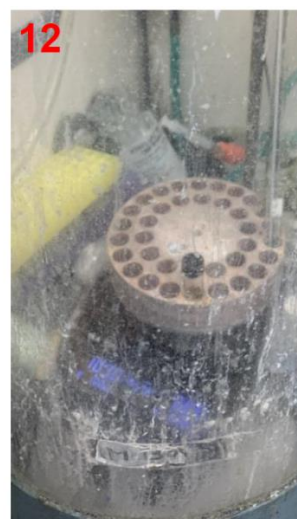

**Step 7 to 8:** Solvent switch prior to C6-selective olefination.

**Step 9 to 12:** Reaction set up for C6-selective olefination. A blast shield was used for safety.

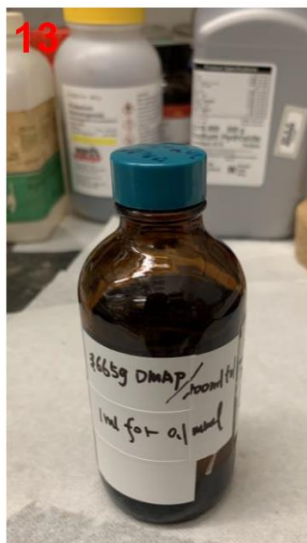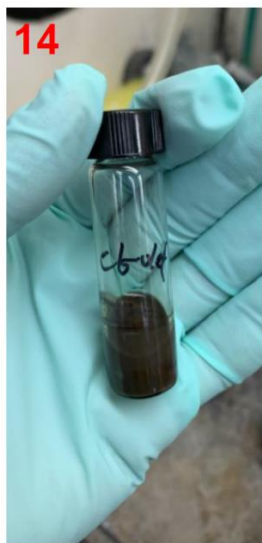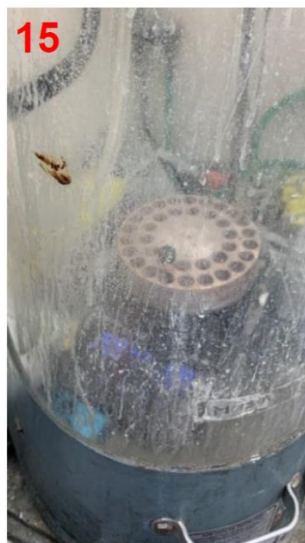

Step 13 to 15: First workup (product release) for C6-selective olefination.

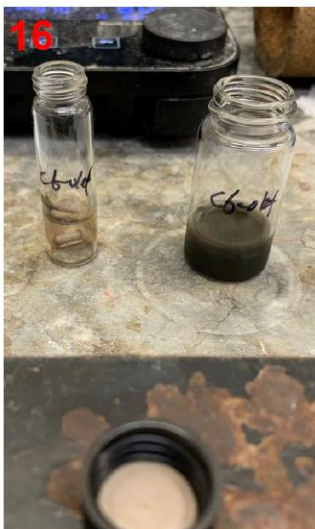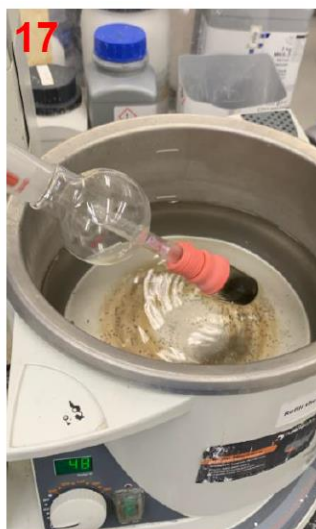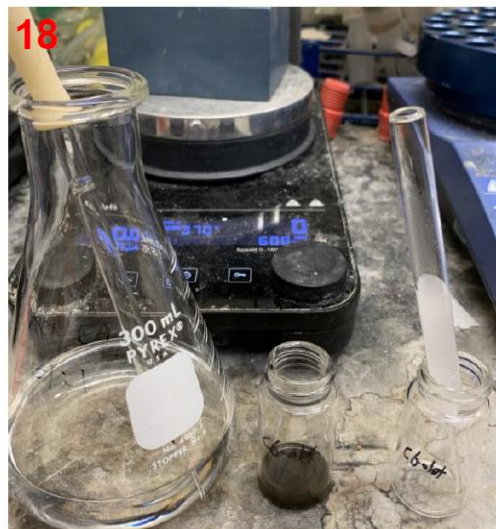

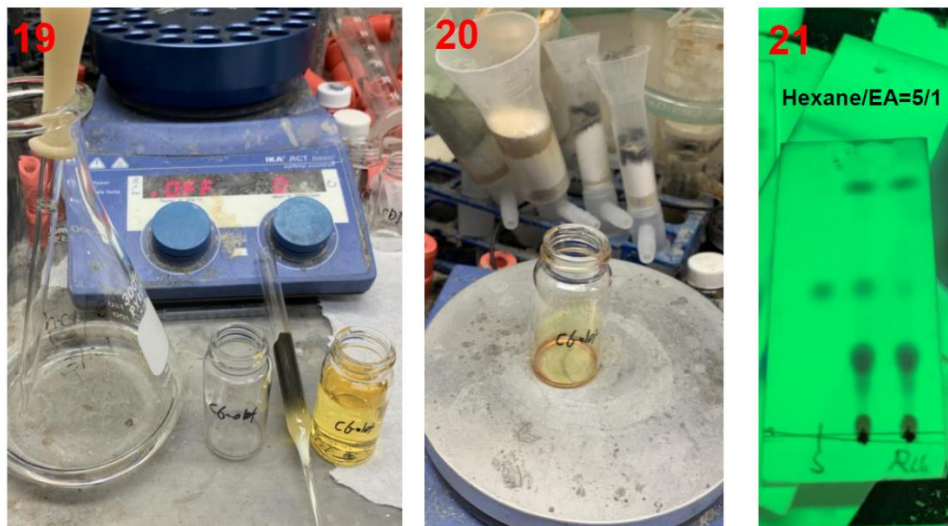

**Step 16 to 20:** Further workup (reaction workup) for C6-selective olefination.

**Step 21:** Representative TLC of reaction after first workup (product release).

## 2.5 General Procedure for C7-Selective C–H Olefination

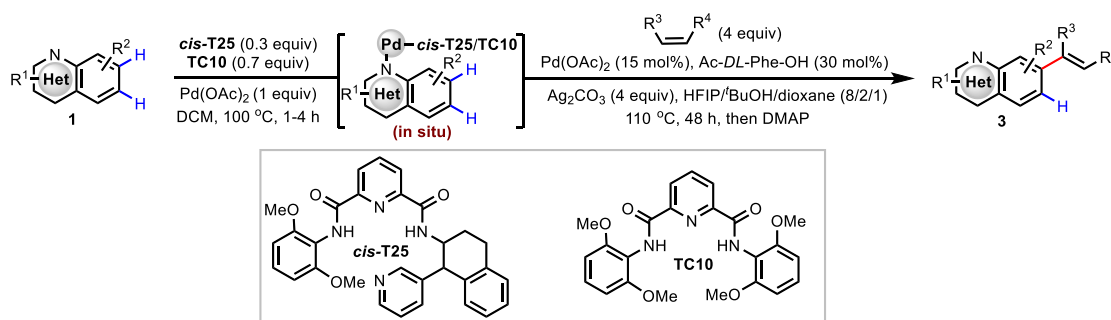

A pressure resistant reaction vial was charged with bicyclic aza-arene (0.05 mmol), *cis*-T25 (7.6 mg, 0.015 mmol), TC10 (15.3 mg, 0.035 mmol), Pd(OAc)<sub>2</sub> (11.2 mg, 0.05 mmol) and DCM (5 mL). The reaction mixture was stirred at 100 °C for 1 – 4 h [Caution: A blast shield was used to mitigate the potential risk of an explosion; we note that in our hands this never occurred] then concentrated *in vacuo*. Pd(OAc)<sub>2</sub> (1.7 mg, 0.0075 mmol), Ac-*DL*-Phe-OH (3.1 mg, 0.015 mmol), Ag<sub>2</sub>CO<sub>3</sub> (55.2 mg, 0.2 mmol), HFIP/BuOH/dioxane (4 ml/1 mL/0.5 mL), and olefin (0.2 mmol) were added in the reaction vial. The vial was capped and allowed to stir at 110 °C for 48 h (600 – 1200 rpm). After cooling to room temperature, DMAP (91.6 mg, 0.75 mmol) was added [Note: If the product release is incomplete, more DMAP should be added]. The mixture was stirred at 110 °C for 1 h. Upon completion, the mixture was passed through a short pad of Celite, washed

with DCM, and concentrated. A portion of the sample was passed through a short pad of silica (in the glass dropper) using hexane/EA (50:50, v/v) as the eluent to give the product mixture for determining the site-selectivity by  $^1\text{H}$  NMR analysis. The remaining material and the sample for analysis were combined and purified by a preparative TLC to afford the products **3a-3y**.

For synthesis of **3z**, **3aa** to **3ad**, a pressure resistant reaction vial was charged with bicyclic aza-arene (0.05 mmol), (*S,S*)-**T25** (7.6 mg, 0.015 mmol) [Note: High optical purity (> 95% ee) is required for obtaining high selectivity], **TC10** (15.3 mg, 0.035 mmol), Pd(OAc)<sub>2</sub> (11.2 mg, 0.05 mmol) and DCM (5 mL). The reaction mixture was stirred at 100 °C for 4 h [Caution: A blast shield was used to mitigate the potential risk of an explosion; we note that in our hands this never occurred] then concentrated *in vacuo*. Pd(MeCN)<sub>2</sub>Cl<sub>2</sub> (3.9 mg, 0.015 mmol) [Note: 30 mol% catalyst was used when increasing the scale], Ac-*L*-Leu-OH (5.2 mg, 0.03 mmol), Ag<sub>2</sub>CO<sub>3</sub> (55.2 mg, 0.2 mmol), HFIP/*t*-BuOH/dioxane (4 ml/1 mL/0.5 mL), and ethyl acrylate (21.7 μL, 0.2 mmol) were added in the reaction vial. The vial was capped and allowed to stir at 110 °C for 48 h (1200 rpm). After cooling to room temperature, DMAP (91.6 mg, 0.75 mmol) was added. The mixture was stirred at 110 °C for 1 h. Upon completion, the mixture was passed through a short pad of Celite, washed with DCM, and concentrated. A portion of the sample was passed through a short pad of silica (in the glass dropper) using hexane/EA (50:50, v/v) as the eluent to give the product mixture for determining the site-selectivity by  $^1\text{H}$  NMR analysis. The remaining material and the sample for analysis were combined and purified by a preparative TLC to afford the products **3z**, **3aa** to **3ad**.

### Graphical Procedure for C7-Selective C–H Olefination

Representative example of preparation of **3a** (0.05 mmol scale)

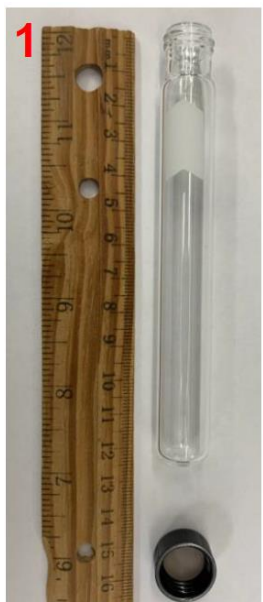

1  
Fisherbrand™ reusable glass tube.  
Capacity: 16 mL; length: 125 mm.  
Fisher Catalog No.14-959-25C.

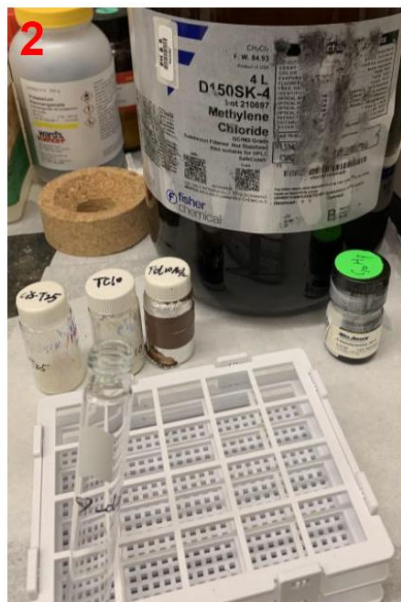

2  
DWK life sciences Wheaton™ black phenolic screw cap.  
Mfr: W240822  
Fisher Catalog No. 02-927-102

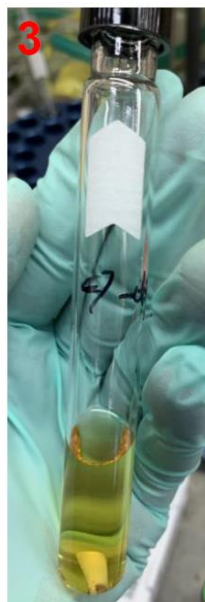

**Step 1 to 3: Reaction set up for template complexation.**

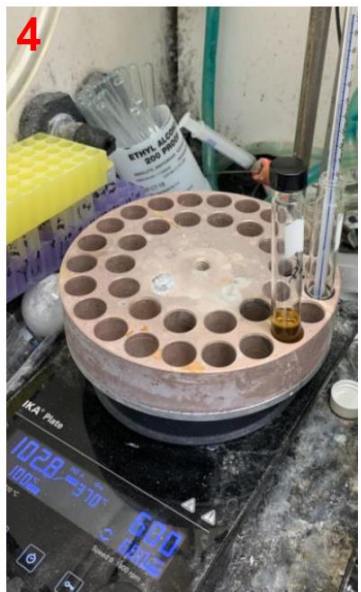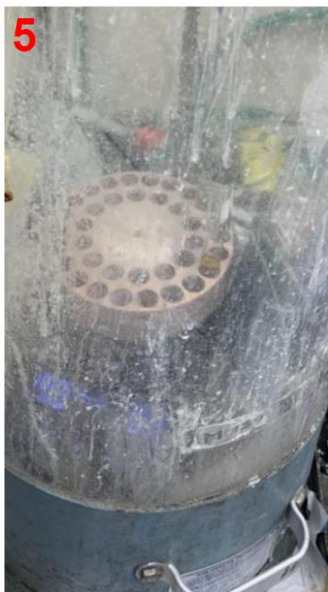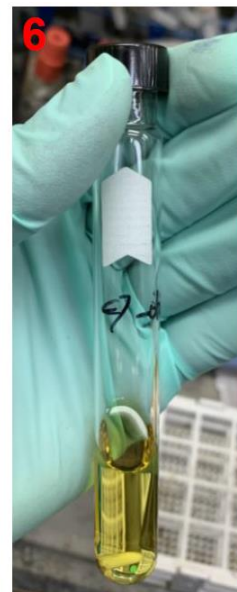

**Step 4 to 6: Preparation of template complexation at 100 °C. A blast shield was used for safety. The resulting solution is shown in 6.**

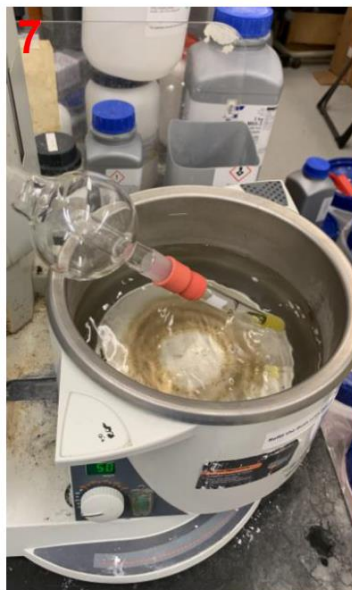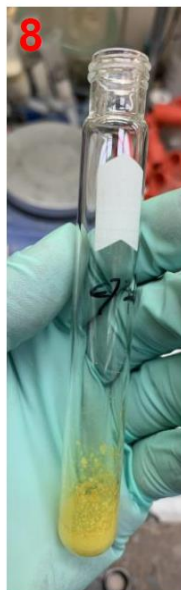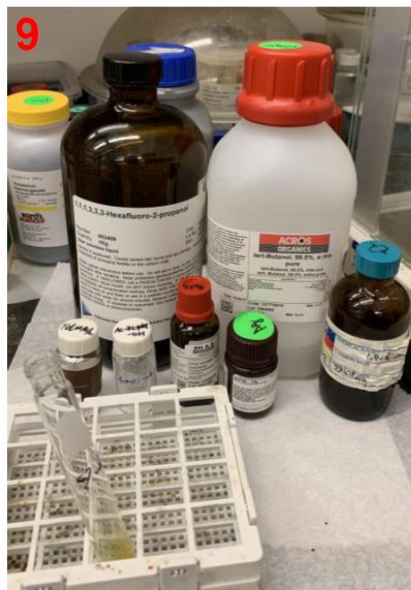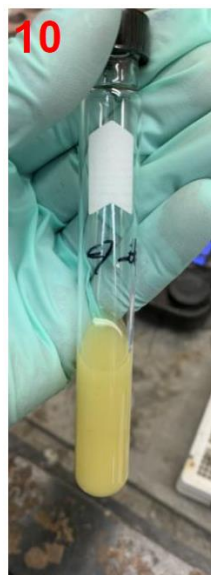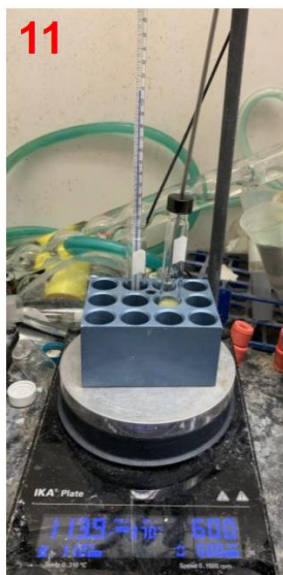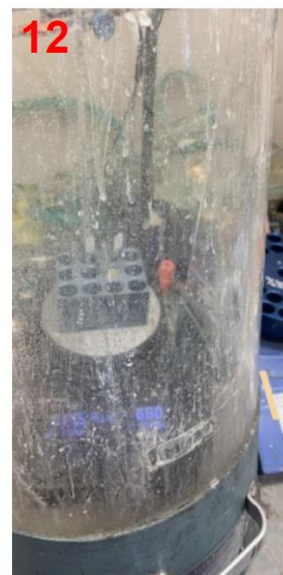

**Step 7 to 8:** Solvent switch prior to C7-selective olefination.

**Step 9 to 12:** Reaction set up for C7-selective olefination. A blast shield was used for safety.

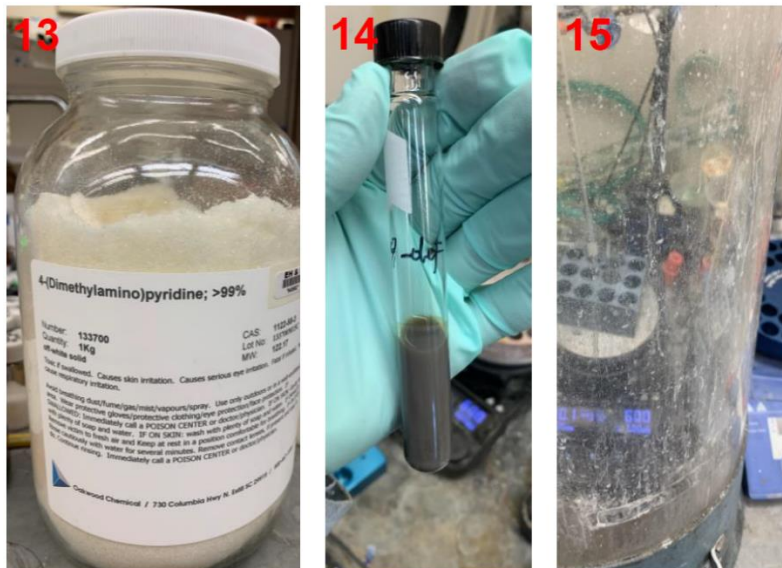

Step 13 to 15: First workup (product release) for C7-selective olefination.

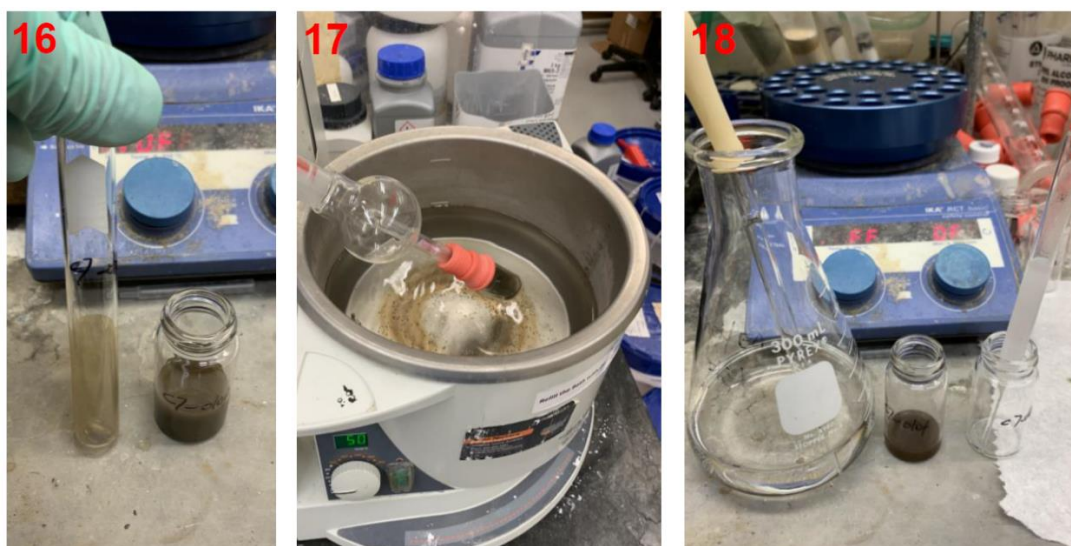



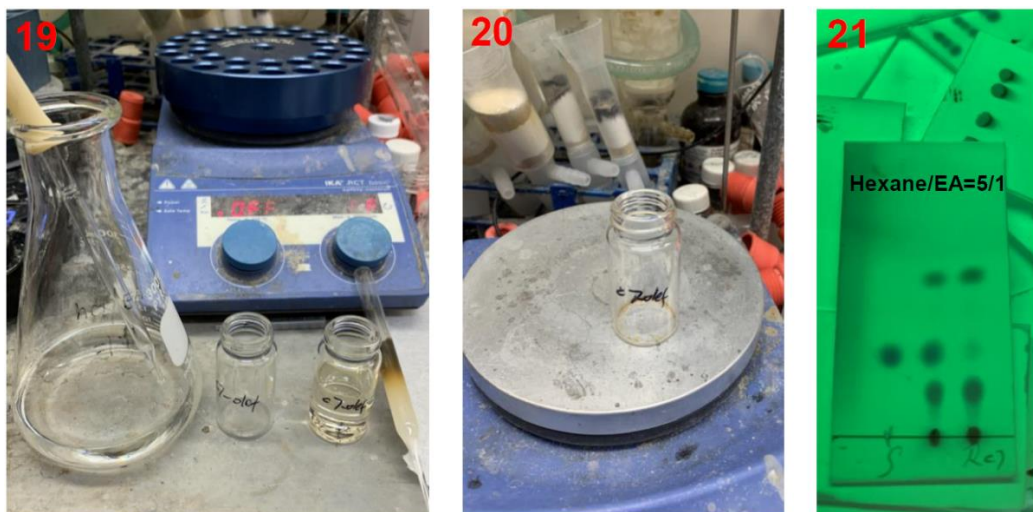

**Step 16 to 20:** Further workup (reaction workup) for C7-selective olefination.

**Step 21:** Representative TLC of reaction after first workup (product release).

## 2.6 General Procedure for C6-Selective C–H Alkynylation

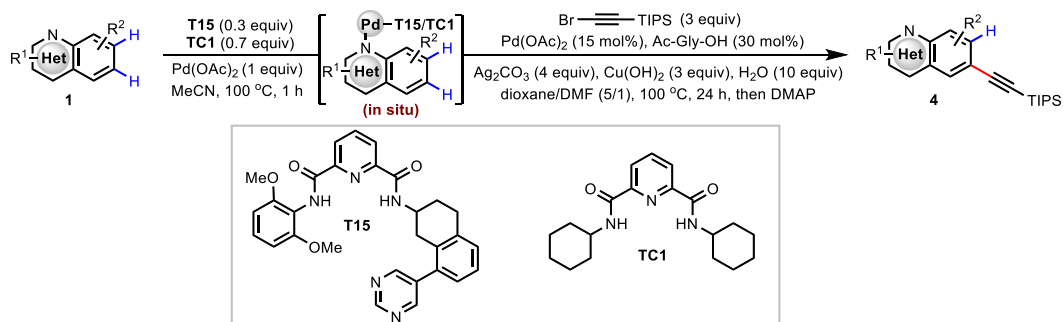

A pressure resistant reaction vial (set up analogous to 2.4) was charged with bicyclic aza-arene (0.1 mmol), **T15** (15.2 mg, 0.03 mmol), **TC1** (23 mg, 0.07 mmol), Pd(OAc)<sub>2</sub> (22.5 mg, 0.1 mmol) and MeCN (2 mL). The reaction mixture was stirred at 100 °C for 1 h then concentrated *in vacuo*. Pd(OAc)<sub>2</sub> (3.4 mg, 0.015 mmol), Ac-Gly-OH (3.5 mg, 0.03 mmol), Ag<sub>2</sub>CO<sub>3</sub> (110 mg, 0.4 mmol), Cu(OH)<sub>2</sub> (29.2 mg, 0.3 mmol), H<sub>2</sub>O (18 μL, 1 mmol), dioxane/DMF (2.5 mL/0.5 mL), and triisopropylsilyl acetylene bromide (78.4 mg, 0.3 mmol) were added in the reaction vial. The vial was capped and allowed to stir at 100 °C for 24 h (600 – 1200 rpm). After cooling to room temperature, DMAP (73.4 mg, 0.6 mmol) and TFE (1 mL) were added. The mixture was stirred at 100 °C for 30 min. Upon completion, the mixture was passed through a short pad of Celite, washed with DCM, and concentrated. A portion of the sample was passed through a short pad of

silica (in the glass dropper) using hexane/EA (50:50, v/v) as the eluent to give the product mixture for determining the site-selectivity by GC-MS and LC-MS analysis. The remaining material and the sample for analysis were combined and purified by a preparative TLC to afford the product **4**.

## 2.7 General Procedure for C6-Selective C–H Alkylation

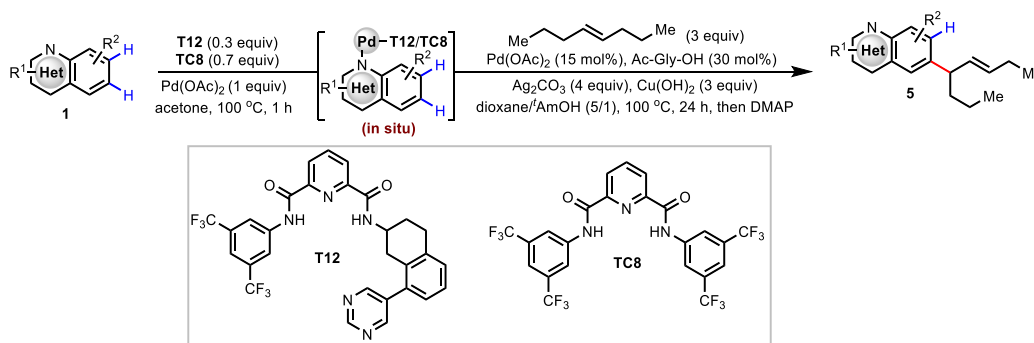

A pressure resistant reaction vial (set up analogous to 2.4) was charged with bicyclic aza-arene (0.1 mmol), **T12** (17.6 mg, 0.03 mmol), **TC8** (41.2 mg, 0.07 mmol), Pd(OAc)<sub>2</sub> (22.5 mg, 0.1 mmol) and acetone (2 mL). The reaction mixture was stirred at 100 °C for 1 h [Caution: A blast shield was used to mitigate the potential risk of an explosion; we note that in our hands this never occurred] then concentrated *in vacuo*. Pd(OAc)<sub>2</sub> (3.4 mg, 0.015 mmol), Ac-Gly-OH (3.5 mg, 0.03 mmol), Ag<sub>2</sub>CO<sub>3</sub> (110 mg, 0.4 mmol), Cu(OH)<sub>2</sub> (29.2 mg, 0.3 mmol), dioxane/AmOH (2.5 mL/0.5 mL), and (*E*)-4-octene (47 μL, 0.3 mmol) were added in the reaction vial. The vial was capped and allowed to stir at 100 °C for 24 h (600 – 1200 rpm). After cooling to room temperature, DMAP (183.2 mg, 1.5 mmol) was added. The mixture was stirred at 100 °C for 30 min. Upon completion, the mixture was passed through a short pad of Celite, washed with DCM, and concentrated. A portion of the sample was passed through a short pad of silica (in the glass dropper) using hexane/EA (50:50, v/v) as the eluent to give the product mixture for determining the site-selectivity by GC-MS and LC-MS analysis. The remaining material and the sample for analysis were combined and purified by a preparative TLC to afford the product **5**.

## 2.8 General Procedure for C7-Selective C–H Alkynylation

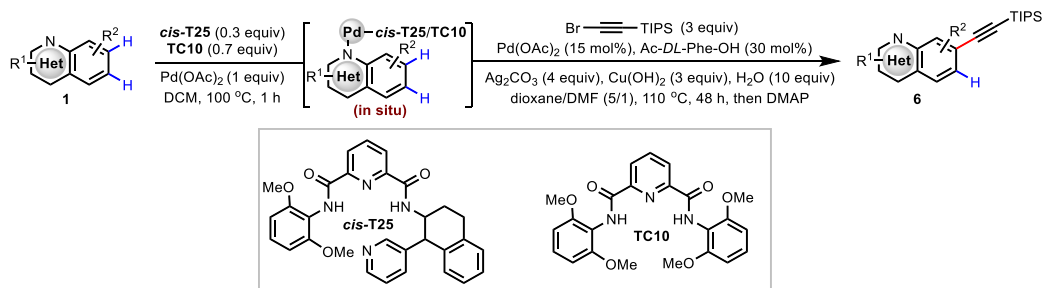

A pressure resistant reaction vial (set up analogous to 2.5) was charged with bicyclic aza-arene (0.05 mmol), *cis*-**T25** (7.6 mg, 0.015 mmol), **TC10** (15.3 mg, 0.035 mmol), Pd(OAc)<sub>2</sub> (11.2 mg, 0.05 mmol) and DCM (5 mL). The reaction mixture was stirred at 100 °C for 1 h [Caution: A blast shield was used to mitigate the potential risk of an explosion; we note that in our hands this never occurred] then concentrated *in vacuo*. Pd(OAc)<sub>2</sub> (1.7 mg, 0.0075 mmol), Ac-*DL*-Phe-OH (3.1 mg, 0.015 mmol), Ag<sub>2</sub>CO<sub>3</sub> (55.2 mg, 0.2 mmol), Cu(OH)<sub>2</sub> (14.6 mg, 0.15 mmol), H<sub>2</sub>O (9 μL, 0.5 mmol), dioxane/DMF (2.5 mL/0.5 mL), and triisopropylsilyl acetylene bromide (39.2 mg, 0.15 mmol) were added in the reaction vial. The vial was capped and allowed to stir at 110 °C for 48 h (600 – 1200 rpm). After cooling to room temperature, DMAP (36.7 mg, 0.3 mmol) and TFE (500 μL) were added. The mixture was stirred at 110 °C for 30 min. Upon completion, the mixture was passed through a short pad of Celite, washed with DCM, and concentrated. A portion of the sample was passed through a short pad of silica (in the glass dropper) using hexane/EA (50:50, v/v) as the eluent to give the product mixture for determining the site-selectivity by GC-MS and LC-MS analysis. The remaining material and the sample for analysis were combined and purified by a preparative TLC to afford the product **6**.

## 2.9 Recycling of Pd and Analysis of Remaining Pd in Product<sup>9,10</sup>

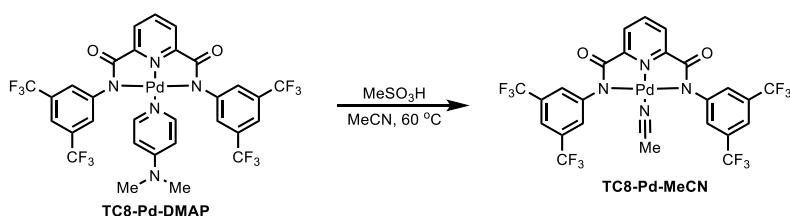

### (a) Recycling of Pd

**TC8-Pd-DMAP** complex was dissolved in MeCN and MeSO<sub>3</sub>H (1 equiv) was added. The resulting mixture was heated at 60 °C for 2 h. After removing the solvent, water was added and extracted with DCM. The organic layer was dried with Na<sub>2</sub>SO<sub>4</sub> and concentrated. This crude mixture was redissolved in MeCN and additional MeSO<sub>3</sub>H (0.5 equiv) was added. The resulting mixture was heated at 60 °C for 30 min. After removing the solvent, water was added and extracted with DCM. The organic layer was dried with Na<sub>2</sub>SO<sub>4</sub> and concentrated to give **TC8-Pd-MeCN** complex in 93 % yield.

According to the procedure 2.4, 80% Pd species (**TC8-Pd-DMAP**) was recovered based on total 1.15 equiv of Pd loadings. Converting **TC8-Pd-DMAP** to active **TC8-Pd-MeCN** gave 93% yield. Therefore, the total Pd recovering yield is 74%.

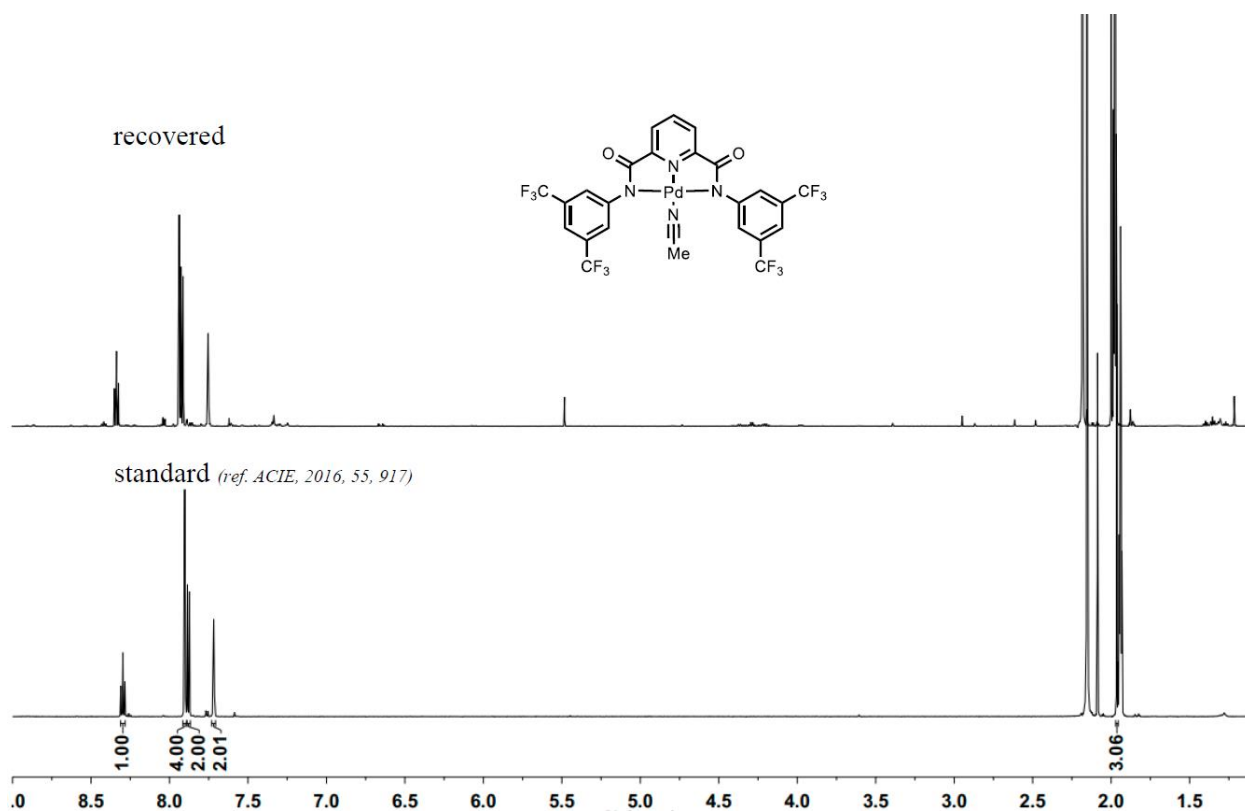

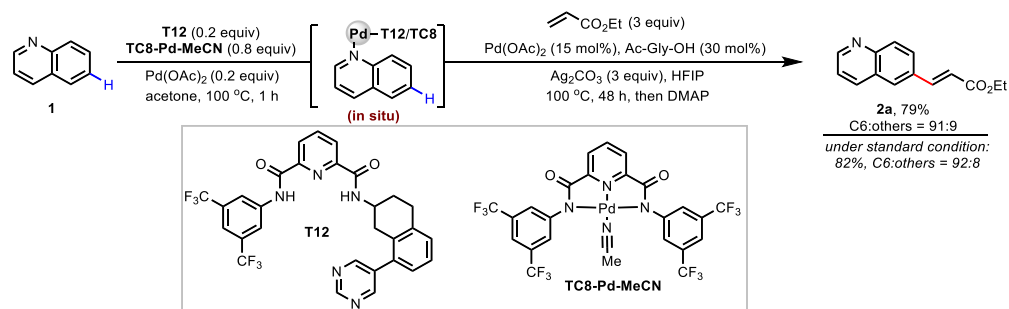

## (b) Analysis of Remaining Pd in Product

### i) Further purification of olefinated quinoline **1a** with palladium scavenger

A reaction vial was charged with **1a** (50 mg), sodium diethyldithiocarbamate trihydrate (991 mg, 20 equiv), MeCN (5 mL) and water (2 mL). The reaction mixture was stirred at 60 °C for 12 h then concentrated *in vacuo*. Then water (10 mL) was added and the solution was extracted with EA (5 mL x 3). The organic phase was washed with brine, dried with Na<sub>2</sub>SO<sub>4</sub>, and concentrated. The residue was purified by a preparative TLC using hexane/EA (3/1) as eluent. ICP-MS Pd-content: 9.5 ppm.

### ii) ICP-MS analysis (UCSD ECAL)

The determination of Pd was performed by ICP-MS (Thermo Scientific iCAP RQ ICP-MS) on a mass to charge ratio of 105. The sample was digested in 1% HNO<sub>3</sub> (Fisher Optima, MilliQ H<sub>2</sub>O) as follows: 5 mL of 1% HNO<sub>3</sub> was added to vial containing 15.3 mg of compound **1a**. After sonication, the sample dissolved completely, and was further diluted 10 x before analysis. Sample was measured via external calibration (Inorganic Ventures CMS-2) monitoring <sup>115</sup>In as an internal standard. Pd concentration was measured as follows: 2.909 ng/mL.

## 2.10 Procedure for Remote Site-Selective C–H Activation of Camptothecin

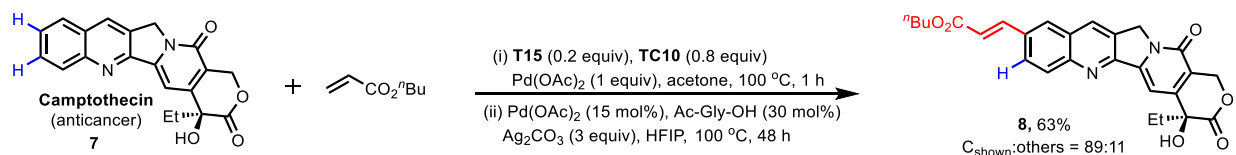

A pressure resistant reaction vial was charged with Camptothecin **7** (35 mg, 0.1 mmol), **T15** (10.2 mg, 0.02 mmol), **TC10** (35 mg, 0.08 mmol), Pd(OAc)<sub>2</sub> (22.5 mg, 0.1 mmol) and acetone (2 mL). The reaction mixture was stirred at 100 °C for 1 h [Caution: A blast shield was used to

mitigate the potential risk of an explosion; we note that in our hands this never occurred] then concentrated *in vacuo*. Pd(OAc)<sub>2</sub> (3.4 mg, 0.015 mmol), Ac-Gly-OH (3.5 mg, 0.03 mmol), Ag<sub>2</sub>CO<sub>3</sub> (82.7 mg, 0.3 mmol), HFIP (2 ml), and n-butyl acrylate (42.7 μL, 0.3 mmol) were added in the reaction vial. The vial was capped and allowed to stir at 100 °C for 48 h. After cooling to room temperature, a solution of DMAP (36.7 mg, 0.3 mmol) in toluene (1 mL) was added. The mixture was stirred at 100 °C for 30 min. Upon completion, the mixture was passed through a short pad of Celite, washed with DCM/MeOH (5/1), and concentrated. A portion of the sample was passed through a short pad of silica (in the glass dropper) using DCM/MeOH (10/1) as the eluent to give the product mixture for test the site-selectivity by <sup>1</sup>H NMR analysis. The remaining material and the sample for analysis were combined and purified by a preparative TLC using EA/acetone (5/1) as eluent to afford the product **8** (30 mg, 63% yield, C<sub>shown</sub>:others = 89:11) as a pale yellow solid. TLC: R<sub>f</sub> = 0.3 (EA/acetone = 5/1). mp: 100-102 °C. <sup>1</sup>H NMR (600 MHz, CDCl<sub>3</sub>) δ 8.38 (s, 1H), 8.22 (d, *J* = 8.8 Hz, 1H), 8.01 (dd, *J* = 8.9, 1.9 Hz, 1H), 7.99 (d, *J* = 1.8 Hz, 1H), 7.86 (d, *J* = 15.9 Hz, 1H), 7.68 (s, 1H), 6.63 (d, *J* = 16.0 Hz, 1H), 5.75 (d, *J* = 16.3 Hz, 1H), 5.33 – 5.29 (m, 3H), 4.26 (t, *J* = 6.7 Hz, 2H), 1.93 (dd, *J* = 14.3, 7.3 Hz, 1H), 1.88 (dd, *J* = 14.3, 7.3 Hz, 1H), 1.74 – 1.71 (m, 2H), 1.49 – 1.45 (m, 2H), 1.05 (t, *J* = 7.4 Hz, 3H), 0.99 (t, *J* = 7.4 Hz, 3H). <sup>13</sup>C NMR (151 MHz, CDCl<sub>3</sub>) δ 173.88, 166.68, 157.60, 153.29, 150.12, 149.71, 146.14, 142.92, 134.12, 131.31, 130.53, 129.37, 129.21, 128.39, 128.17, 120.66, 119.07, 98.40, 72.72, 66.36, 64.77, 50.05, 31.64, 30.77, 19.22, 13.77, 7.83. HRMS (ESI-TOF) *m/z* Calcd for C<sub>27</sub>H<sub>27</sub>N<sub>2</sub>O<sub>6</sub><sup>+</sup> [M+H]<sup>+</sup> 475.1869, found 475.1874. [α]<sub>D</sub><sup>21</sup> = + 11.6 (*c* 0.1, CHCl<sub>3</sub>/MeOH, 4/1, v/v). IR (film) ν<sub>max</sub> 2923, 2853, 1737, 1657, 1594, 1459, 1377, 1233, 1161, 1108, 1050, 833 cm<sup>-1</sup>.

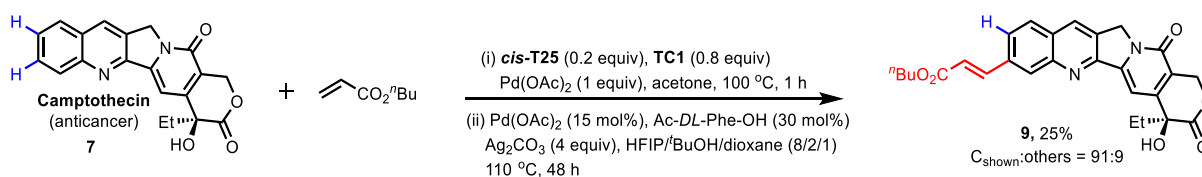

A pressure resistant reaction tube was charged with Camptothecin **7** (35 mg, 0.1 mmol), *cis*-**T25** (15 mg, 0.03 mmol), **TC1** (23 mg, 0.07 mmol), Pd(OAc)<sub>2</sub> (22.5 mg, 0.1 mmol) and acetone (5 mL). The reaction mixture was stirred at 100 °C for 1 h [Caution: A blast shield was used to mitigate the potential risk of an explosion; we note that in our hands this never occurred] then concentrated *in vacuo*. Pd(OAc)<sub>2</sub> (3.4 mg, 0.015 mmol), Ac-*DL*-Phe-OH (6.2 mg, 0.03 mmol),

Ag<sub>2</sub>CO<sub>3</sub> (110 mg, 0.4 mmol), HFIP/<sup>*t*</sup>BuOH/dioxane (8 ml/2 mL/1 mL), and n-butyl acrylate (57, 0.4 mmol) were added in the reaction vial. The vial was capped and allowed to stir at 110 °C for 48 h. After cooling to room temperature, a solution of DMAP (36.7 mg, 0.3 mmol) in toluene (1 mL) was added. The mixture was stirred at 110 °C for 30 min. Upon completion, the mixture was passed through a short pad of Celite, washed with DCM/MeOH (5/1), and concentrated. A portion of the sample was passed through a short pad of silica (in the glass dropper) using DCM/MeOH (10/1) as the eluent to give the product mixture for test the site-selectivity by <sup>1</sup>H NMR analysis. The remaining material and the sample for analysis were combined and purified by a preparative TLC using DCM/<sup>*i*</sup>PrOH (40/1) as eluent to afford the product **9** (11.8 mg, 25% yield, C<sub>shown</sub>:others = 91:9) as a pale yellow solid. TLC: R<sub>f</sub> = 0.2 (DCM/<sup>*i*</sup>PrOH = 40/1). mp: 238-240 °C. <sup>1</sup>H NMR (600 MHz, CDCl<sub>3</sub>) δ 8.37 (s, 1H), 8.30 (s, 1H), 7.93 (d, *J* = 8.6 Hz, 1H), 7.88 (d, *J* = 16.0 Hz, 1H), 7.82 (dd, *J* = 8.5, 1.6 Hz, 1H), 7.68 (s, 1H), 6.67 (d, *J* = 16.0 Hz, 1H), 5.75 (d, *J* = 16.2 Hz, 1H), 5.33 – 5.30 (m, 3H), 4.27 (t, *J* = 6.7 Hz, 2H), 1.94 – 1.87 (m, 2H), 1.75 – 1.71 (m, 2H), 1.49 – 1.45 (m, 2H), 1.05 (t, *J* = 7.4 Hz, 3H), 1.00 (t, *J* = 7.4 Hz, 3H). <sup>13</sup>C NMR (151 MHz, CDCl<sub>3</sub>) δ 173.86, 166.63, 157.60, 153.32, 150.14, 149.07, 146.11, 143.16, 136.73, 130.78, 130.53, 129.40, 128.88, 128.70, 125.98, 121.05, 119.02, 98.29, 72.72, 66.35, 64.79, 50.09, 31.64, 30.77, 19.23, 13.77, 7.83. HRMS (ESI-TOF) *m/z* Calcd for C<sub>27</sub>H<sub>27</sub>N<sub>2</sub>O<sub>6</sub><sup>+</sup> [M+H]<sup>+</sup> 475.1869, found 475.1869. [α]<sub>D</sub><sup>21</sup> = – 5.5 (*c* 0.1, CHCl<sub>3</sub>/MeOH, 4/1, v/v). IR (film) ν<sub>max</sub> 2960, 2929, 1747, 1710, 1656, 1597, 1461, 1378, 1276, 1261, 1176, 1156, 1106, 1046, 751 cm<sup>-1</sup>.

## 2.11 Procedure for Synthesis of Cabozantinib Analogue 12

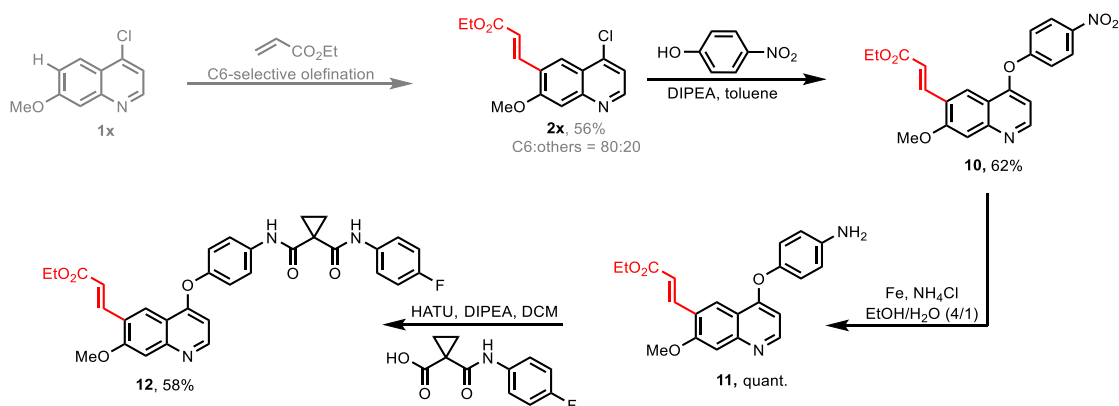

To a solution of **2x** (36.7 mg, 0.19 mmol) in dry toluene (3 mL) was added DIPEA (79  $\mu$ L, 0.48 mmol) and 4-nitrophenol (52.9 mg, 0.38 mmol). The reaction mixture was stirred at 120 °C for overnight. After completion, the mixture was concentrated and purified by a preparative TLC using DCM/EA (20/1) as eluent to afford the product **10** (46.4 mg, 62% yield) as a white solid. TLC:  $R_f$  = 0.4 (DCM/EA = 20/1). mp: 138-140 °C.  $^1\text{H}$  NMR (600 MHz,  $\text{CDCl}_3$ )  $\delta$  8.71 (d,  $J$  = 5.1 Hz, 1H), 8.38 – 8.33 (m, 3H), 8.07 (d,  $J$  = 16.2 Hz, 1H), 7.48 (s, 1H), 7.30 (d,  $J$  = 9.1 Hz, 2H), 6.72 (d,  $J$  = 16.2 Hz, 1H), 6.63 (d,  $J$  = 5.1 Hz, 1H), 4.29 (q,  $J$  = 7.1 Hz, 2H), 4.06 (s, 3H), 1.35 (t,  $J$  = 7.1 Hz, 3H).  $^{13}\text{C}$  NMR (151 MHz,  $\text{CDCl}_3$ )  $\delta$  166.97, 160.02, 160.00, 159.82, 152.37, 152.32, 144.71, 139.19, 126.27, 126.25, 122.42, 121.48, 120.34, 116.12, 107.67, 105.24, 60.64, 55.96, 14.35. HRMS (ESI-TOF)  $m/z$  Calcd for  $\text{C}_{21}\text{H}_{19}\text{N}_2\text{O}_6^+$   $[\text{M}+\text{H}]^+$  395.1243, found 395.1238. IR (film)  $\nu_{\text{max}}$  2978, 1708, 1618, 1565, 1522, 1490, 1454, 1344, 1308, 1231, 1172, 1008, 863  $\text{cm}^{-1}$ .

To a solution of **10** (19.7 mg, 0.05 mmol) in EtOH/ $\text{H}_2\text{O}$  (1 mL/0.25 mL) was added Fe dust (14 mg, 0.25 mmol) and  $\text{NH}_4\text{Cl}$  (26.7 mg, 0.5 mmol). The reaction mixture was stirred at 65 °C for 1 h. After completion, water (5 mL) was added and the mixture was extracted with EA (3 mL x 3). The combined organic layers were dried with  $\text{Na}_2\text{SO}_4$  and concentrated. The residue was purified by a preparative TLC using EA/DCM (5/1) as eluent to afford the product **11** (18.2 mg, quant. yield) as a pale yellow solid. TLC:  $R_f$  = 0.4 (EA/DCM = 5/1). mp: 142-144 °C.  $^1\text{H}$  NMR (600 MHz,  $\text{CDCl}_3$ )  $\delta$  8.55 (d,  $J$  = 5.3 Hz, 1H), 8.53 (s, 1H), 8.11 (d,  $J$  = 16.2 Hz, 1H), 7.41 (s, 1H), 6.98 (d,  $J$  = 8.7 Hz, 2H), 6.77 – 6.74 (m, 3H), 6.40 (d,  $J$  = 5.3 Hz, 1H), 4.29 (q,  $J$  = 7.1 Hz, 2H), 4.03 (s, 3H), 1.35 (t,  $J$  = 7.1 Hz, 3H).  $^{13}\text{C}$  NMR (151 MHz,  $\text{CDCl}_3$ )  $\delta$  167.21, 163.05, 159.43, 152.53, 151.87, 145.80, 144.34, 139.65, 125.08, 123.12, 122.17, 120.71, 116.31, 115.85, 107.28, 102.50, 60.49, 55.80, 14.37. HRMS (ESI-TOF)  $m/z$  Calcd for  $\text{C}_{21}\text{H}_{21}\text{N}_2\text{O}_4^+$   $[\text{M}+\text{H}]^+$  365.1501, found 365.1502. IR (film)  $\nu_{\text{max}}$  3361, 2977, 1703, 1619, 1571, 1508, 1454, 1351, 1307, 1270, 1230, 1206, 1178, 1036, 1010, 848  $\text{cm}^{-1}$ .

To a solution of **11** (18.2 mg, 0.05 mmol), aliphatic acid (16.7 mg, 0.075 mmol), and DIPEA (16.5  $\mu$ L, 0.1 mmol) in DCM (3 mL) at 0 °C was added HATU (28.5 mg, 0.075 mmol). The solution was warmed to room temperature and stirred for overnight. The reaction mixture was evaporated and purified by a preparative TLC using EA/DCM (5/1) as eluent to provide the



product **12** (16.5 mg, 58% yield) as pale yellow oil. TLC:  $R_f = 0.3$  (EA/DCM = 5/1).  $^1\text{H}$  NMR (600 MHz,  $\text{CDCl}_3$ )  $\delta$  9.48 (s, 1H), 8.90 (s, 1H), 8.57 (d,  $J = 5.3$  Hz, 1H), 8.49 (s, 1H), 8.09 (d,  $J = 16.1$  Hz, 1H), 7.64 (d,  $J = 8.9$  Hz, 2H), 7.48 (dd,  $J = 9.1, 4.8$  Hz, 2H), 7.41 (s, 1H), 7.17 (d,  $J = 8.9$  Hz, 2H), 7.04 (t,  $J = 8.6$  Hz, 2H), 6.75 (d,  $J = 16.1$  Hz, 1H), 6.42 (d,  $J = 5.3$  Hz, 1H), 4.28 (q,  $J = 7.1$  Hz, 2H), 4.02 (s, 3H), 1.75 – 1.71 (m, 2H), 1.68 – 1.65 (m, 2H), 1.35 (t,  $J = 7.2$  Hz, 3H).  $^{13}\text{C}$  NMR (151 MHz,  $\text{CDCl}_3$ )  $\delta$  169.27, 168.82, 167.23, 162.18, 160.60, 159.53, 158.98, 152.44, 151.98, 150.50, 139.57, 135.10, 133.10 (d,  $J = 3.0$  Hz), 125.35, 122.95, 122.79, 122.74, 122.49, 121.72, 120.87, 115.87, 115.84, 115.72, 107.34, 102.99, 60.58, 55.83, 29.21, 17.61, 14.35.  $^{19}\text{F}$  NMR (376 MHz,  $\text{CDCl}_3$ )  $\delta$  -119.55. HRMS (ESI-TOF)  $m/z$  Calcd for  $\text{C}_{32}\text{H}_{29}\text{FN}_3\text{O}_6^+$   $[\text{M}+\text{H}]^+$  570.2040, found 570.2049. IR (film)  $\nu_{\text{max}}$  3062, 2360, 1683, 1617, 1504, 1453, 1408, 1350, 1307, 1228, 1207, 1176, 1036, 1012, 982, 834, 735  $\text{cm}^{-1}$ .

## 2.12 Procedure for Synthesis of Chloroquine Analogue 13

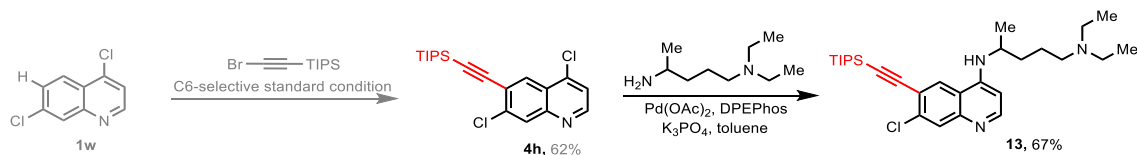

To a solution of **4h** (11.3 mg, 0.03 mmol),  $\text{Pd}(\text{OAc})_2$  (0.7 mg, 0.003 mmol), DPEPhos (3.2 mg, 0.006 mmol), and  $\text{K}_3\text{PO}_4$  (12.7 g, 0.06 mmol) in dry toluene (2 mL) was added amine (8.7  $\mu\text{L}$ , 0.045 mmol). The vial was filled with  $\text{N}_2$ , then sealed and put into a preheated oil bath at 120  $^\circ\text{C}$  for 3 h. After completion, the reaction mixture was basified with 10% aqueous NaOH solution (10 mL) and the solution was extracted with EA (3 mL x 3). The organic phase was washed with brine, dried with  $\text{Na}_2\text{SO}_4$ , and concentrated. The residue was purified by a preparative TLC using THF/hexane/ $\text{Et}_3\text{N}$  (10/1/0.005) as eluent to provide the product **13** (10 mg, 67% yield) as colorless oil. TLC:  $R_f = 0.5$  (THF/hexane/ $\text{Et}_3\text{N} = 10/1/0.005$ ).  $^1\text{H}$  NMR (600 MHz,  $\text{CDCl}_3$ )  $\delta$  8.46 (d,  $J = 5.5$  Hz, 1H), 8.11 (s, 1H), 7.98 (s, 1H), 6.38 (d,  $J = 5.6$  Hz, 1H), 6.09 (s, 1H), 3.73 (d,  $J = 6.8$  Hz, 1H), 2.82 (q,  $J = 7.3$  Hz, 4H), 2.70 (d,  $J = 7.7$  Hz, 2H), 1.91 (dt,  $J = 13.9, 6.5$  Hz, 1H), 1.83 – 1.74 (m, 3H), 1.34 (d,  $J = 6.4$  Hz, 3H), 1.17 (m, 27H).  $^{13}\text{C}$  NMR (151 MHz,  $\text{CDCl}_3$ )  $\delta$  149.16, 136.50, 128.93, 126.02, 124.96, 123.06, 119.57, 117.34, 103.06, 99.39, 96.88, 62.78, 52.05, 48.37, 46.90, 33.89, 29.96, 20.05, 18.72, 11.38. HRMS (ESI-TOF)  $m/z$  Calcd for

$C_{29}H_{47}ClN_3Si^+ [M+H]^+$  500.3228, found 500.3230. IR (film)  $\nu_{max}$  2940, 2864, 2158, 1611, 1568, 1452, 1356, 1254, 1193, 1154, 1071, 995, 883, 800, 753, 676  $cm^{-1}$ .

### 2.13 Procedure for Iterative C–H Activation of Quinoline

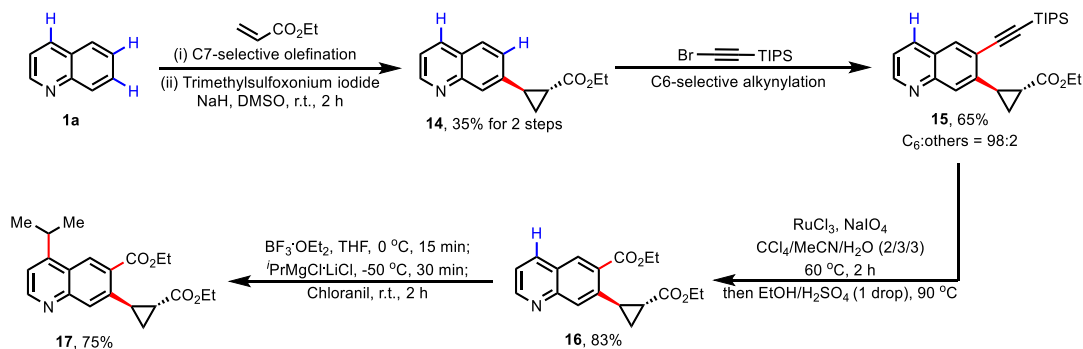

**3z** was synthesized according to the general procedure 2.5.

To a solution of NaH (6 mg, 0.15 mmol) in dry DMSO was added trimethylsulfoxonium iodide (33 mg, 0.15 mmol). The mixture was stirred at room temperature for 0.5 h. **3z** (22.7 mg, 0.1 mmol) in dry DMSO was added and the mixture was stirred at room temperature for 2 h. Water (10 mL) was added and the solution was extracted with EA (3 mL x 3). The organic phase was washed with brine, dried with  $Na_2SO_4$ , and concentrated. The residue was purified by a preparative TLC using DCM/EA (8/1, v/v) as eluent to afford the product **14** (16 mg, 66% yield) as a white solid. TLC:  $R_f$  = 0.3 (hexane/EA = 15/1). mp: 65-67 °C.  $^1H$  NMR (600 MHz,  $CDCl_3$ )  $\delta$  8.88 (dd,  $J$  = 4.2, 1.7 Hz, 1H), 8.11 (ddd,  $J$  = 8.2, 2.0, 0.9 Hz, 1H), 7.79 (dt,  $J$  = 1.5, 0.7 Hz, 1H), 7.74 (d,  $J$  = 8.4 Hz, 1H), 7.34 (dd,  $J$  = 8.2, 4.2 Hz, 1H), 7.32 (dd,  $J$  = 8.5, 1.8 Hz, 1H), 4.20 (q,  $J$  = 7.1 Hz, 2H), 2.72 (ddd,  $J$  = 9.1, 6.4, 4.1 Hz, 1H), 2.06 (ddd,  $J$  = 8.3, 5.3, 4.1 Hz, 1H), 1.72 (ddd,  $J$  = 9.2, 5.4, 4.7 Hz, 1H), 1.48 (ddd,  $J$  = 8.5, 6.4, 4.7 Hz, 1H), 1.30 (t,  $J$  = 7.1 Hz, 3H).  $^{13}C$  NMR (151 MHz,  $CDCl_3$ )  $\delta$  173.13, 150.78, 148.33, 141.95, 135.73, 127.90, 127.01, 125.76, 125.69, 120.69, 60.86, 26.25, 24.70, 17.37, 14.27. HRMS (ESI-TOF)  $m/z$  Calcd for  $C_{15}H_{16}NO_2^+$   $[M+H]^+$  242.1181, found 242.1191. IR (film)  $\nu_{max}$  2982, 1719, 1625, 1504, 1460, 1408, 1369, 1325, 1181, 1045, 966, 939, 890, 831  $cm^{-1}$ .

**15** was synthesized according to the general procedure 2.6. Colorless oil. TLC:  $R_f$  = 0.3 (hexane/EA = 20/1).  $^1H$  NMR (600 MHz,  $CDCl_3$ )  $\delta$  8.85 (dd,  $J$  = 4.2, 1.7 Hz, 1H), 8.07 (ddd,  $J$  =

8.5, 1.9, 0.7 Hz, 1H), 7.98 (s, 1H), 7.59 (s, 1H), 7.35 (dd,  $J = 8.2, 4.2$  Hz, 1H), 4.17 (q,  $J = 7.2$  Hz, 2H), 3.16 (dddd,  $J = 9.2, 6.5, 4.3, 0.7$  Hz, 1H), 2.09 (ddd,  $J = 8.5, 5.4, 4.3$  Hz, 1H), 1.75 – 1.72 (m, 1H), 1.50 – 1.46 (m, 1H), 1.28 (t,  $J = 7.1$  Hz, 3H), 1.17 (d,  $J = 3.0$  Hz, 21H).  $^{13}\text{C}$  NMR (151 MHz,  $\text{CDCl}_3$ )  $\delta$  172.78, 151.24, 147.78, 142.92, 135.24, 132.48, 126.53, 124.19, 123.10, 121.30, 104.44, 96.69, 60.70, 24.54, 24.50, 18.71, 17.29, 14.22, 11.33. HRMS (ESI-TOF)  $m/z$  Calcd for  $\text{C}_{26}\text{H}_{36}\text{NO}_2\text{Si}^+$   $[\text{M}+\text{H}]^+$  422.2515, found 422.2514. IR (film)  $\nu_{\text{max}}$  2941, 2864, 2151, 1726, 1622, 1591, 1562, 1462, 1406, 1321, 1179, 1047, 1018, 995, 918, 884, 825, 677  $\text{cm}^{-1}$ .

A reaction vial was charged with **15** (21 mg, 0.05 mmol),  $\text{RuCl}_3$  (1 mg, 0.005 mmol),  $\text{NaIO}_4$  (43.2 mg, 0.2 mmol) and  $\text{CCl}_4/\text{MeCN}/\text{H}_2\text{O}$  (500  $\mu\text{L}/750 \mu\text{L}/750 \mu\text{L}$ ). The mixture was stirred at 60  $^\circ\text{C}$  for 2 h then concentrated *in vacuo*. Water (10 mL) was added and the solution was extracted with EA (5 mL x 3). The organic phase was washed with brine, dried with  $\text{Na}_2\text{SO}_4$ , and concentrated. The residue was re-dissolved in EtOH (2 mL) and *conc.*  $\text{H}_2\text{SO}_4$  (1 drop) was added. The mixture was stirred at 90  $^\circ\text{C}$  for overnight then concentrated *in vacuo*. 10% aqueous NaOH solution (10 mL) was added and the solution was extracted with EA (5 mL x 3). The organic phase was washed with brine, dried with  $\text{Na}_2\text{SO}_4$ , and concentrated. The residue was purified by a preparative TLC using hexane/EA (1/1, v/v) as eluent to afford the product **16** (13 mg, 83% yield) as colorless oil. TLC:  $R_f = 0.5$  (hexane/EA = 1/1).  $^1\text{H}$  NMR (600 MHz,  $\text{CDCl}_3$ )  $\delta$  8.96 (dd,  $J = 4.2, 1.7$  Hz, 1H), 8.41 (s, 1H), 8.21 (d,  $J = 7.5$  Hz, 1H), 7.85 (s, 1H), 7.43 (dd,  $J = 8.2, 4.1$  Hz, 1H), 4.48 – 4.44 (m, 1H), 4.42 – 4.38 (m, 1H), 4.22 (q,  $J = 7.1$  Hz, 2H), 3.28 – 3.24 (m, 1H), 1.89 (dt,  $J = 7.9, 4.9$  Hz, 1H), 1.70 (dd,  $J = 9.3, 4.7$  Hz, 1H), 1.53 (ddd,  $J = 8.0, 5.1, 3.5$  Hz, 1H), 1.43 (t,  $J = 7.2$  Hz, 3H), 1.31 (t,  $J = 7.3$  Hz, 3H).  $^{13}\text{C}$  NMR (151 MHz,  $\text{CDCl}_3$ )  $\delta$  173.41, 167.04, 152.58, 149.24, 140.78, 136.61, 131.51, 130.60, 127.75, 126.20, 121.66, 61.54, 60.68, 25.55, 23.80, 15.91, 14.32, 14.27. HRMS (ESI-TOF)  $m/z$  Calcd for  $\text{C}_{18}\text{H}_{20}\text{NO}_4^+$   $[\text{M}+\text{H}]^+$  314.1392, found 314.1407. IR (film)  $\nu_{\text{max}}$  2931, 1722, 1625, 1569, 1458, 1406, 1321, 1265, 1208, 1182, 1069, 1046  $\text{cm}^{-1}$ .

**17** was synthesized according to modified literature procedure:<sup>11</sup> A reaction vial was charged with **16** (9.4 mg, 0.03 mmol) in dry THF and cooled to 0  $^\circ\text{C}$ .  $\text{BF}_3 \cdot \text{OEt}_2$  (4  $\mu\text{L}$ , 0.033 mmol) was added and stirred at 0  $^\circ\text{C}$  for 0.5 h. Then,  $^i\text{PrMgCl} \cdot \text{LiCl}$  (0.036 mmol) was added at -30  $^\circ\text{C}$  and stirring at room temperature for 0.5 h. Chloranil (14.8 mg, 0.06 mmol) was added and the

mixture continuously stirred at room temperature for 1.5 h. The mixture was quenched with 10% aqueous NaOH solution (10 mL) and extracted with EA (5 mL x 3). The organic phase was washed with brine, dried with Na<sub>2</sub>SO<sub>4</sub>, and concentrated. The residue was purified by a preparative TLC using hexane/EA (1/1, v/v) as eluent to afford the product **17** (8 mg, 75% yield) as colorless oil. TLC: *R<sub>f</sub>* = 0.5 (hexane/EA = 1/1). <sup>1</sup>H NMR (600 MHz, CDCl<sub>3</sub>) δ 8.88 (d, *J* = 4.6 Hz, 1H), 8.67 (s, 1H), 7.84 (s, 1H), 7.32 (d, *J* = 4.6 Hz, 1H), 4.49 – 4.46 (m, 1H), 4.42 – 4.39 (m, 1H), 4.22 (d, *J* = 7.2 Hz, 2H), 3.79 – 3.76 (m, 1H), 3.24 (dtd, *J* = 6.9, 2.4, 1.0 Hz, 1H), 1.90 – 1.88 (m, 1H), 1.70 – 1.67 (m, 1H), 1.54 – 1.52 (m, 1H), 1.44 (d, *J* = 7.2 Hz, 3H), 1.41 (dd, *J* = 6.8, 1.8 Hz, 6H), 1.31 (t, *J* = 7.1 Hz, 3H). <sup>13</sup>C NMR (151 MHz, CDCl<sub>3</sub>) δ 173.48, 167.57, 155.58, 152.60, 149.52, 139.89, 130.16, 128.64, 127.09, 124.95, 117.55, 61.58, 60.67, 28.40, 25.50, 23.72, 23.05, 15.86, 14.32, 14.28. HRMS (ESI-TOF) *m/z* Calcd for C<sub>21</sub>H<sub>26</sub>NO<sub>4</sub><sup>+</sup> [M+H]<sup>+</sup> 356.1862, found 356.1871. IR (film) ν<sub>max</sub> 2967, 1723, 1620, 1588, 1447, 1406, 1320, 1265, 1215, 1180, 1070, 1048, 859 cm<sup>-1</sup>.

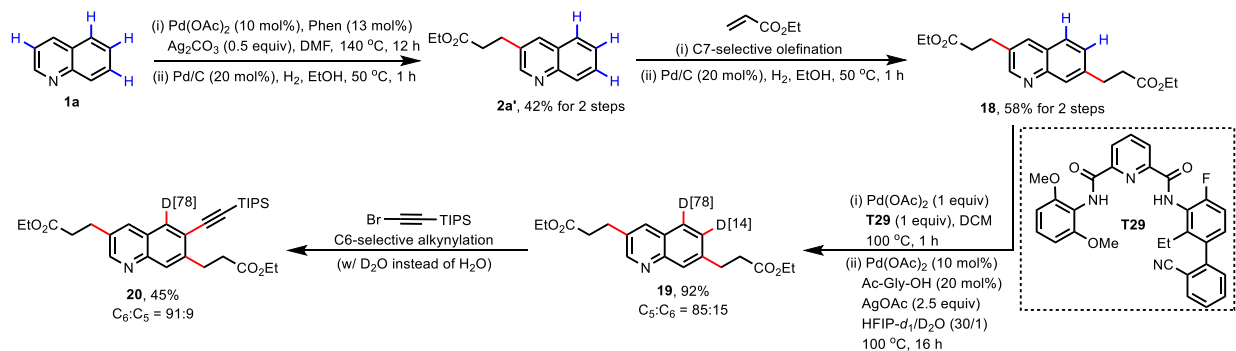

**18** was synthesized according to the literature procedure<sup>12</sup> and general procedure 2.5. White solid. TLC: *R<sub>f</sub>* = 0.3 (hexane/EA = 3/1). mp: 75-77 °C. <sup>1</sup>H NMR (600 MHz, CDCl<sub>3</sub>) δ 8.77 (d, *J* = 2.3 Hz, 1H), 7.93 (d, *J* = 1.2 Hz, 1H), 7.88 – 7.86 (m, 1H), 7.70 (d, *J* = 8.3 Hz, 1H), 7.40 (dd, *J* = 8.3, 1.8 Hz, 1H), 4.16 – 4.11 (m, 4H), 3.14 (dt, *J* = 17.9, 7.7 Hz, 4H), 2.73 (q, *J* = 7.6 Hz, 4H), 1.27 – 1.22 (m, 6H). <sup>13</sup>C NMR (151 MHz, CDCl<sub>3</sub>) δ 172.70, 172.36, 151.79, 147.21, 141.68, 134.21, 132.77, 128.00, 127.66, 127.46, 126.59, 60.66, 60.55, 35.52, 35.47, 31.05, 28.22, 14.23, 14.20. HRMS (ESI-TOF) *m/z* Calcd for C<sub>19</sub>H<sub>24</sub>NO<sub>4</sub><sup>+</sup> [M+H]<sup>+</sup> 330.1705, found 330.1711. IR (film) ν<sub>max</sub> 2921, 1724, 1423, 1376, 1334, 1296, 1179, 1056, 1022, 906, 816 cm<sup>-1</sup>.

**19** was synthesized according to modified literature procedure:<sup>13</sup> A pressure resistant reaction vial was charged with **18** (33 mg, 0.1 mmol), **T29** (52.4 mg, 0.1 mmol), Pd(OAc)<sub>2</sub> (22.5 mg, 0.1 mmol) and DCM (2 mL). The reaction mixture was stirred at 100 °C for 1 h then concentrated *in vacuo*. Pd(OAc)<sub>2</sub> (2.2 mg, 0.01 mmol), Ac-Gly-OH (2.3 mg, 0.02 mmol), AgOAc (41.8 mg, 0.25 mmol), HFIP-*d*<sub>1</sub> (1.2 mL), and D<sub>2</sub>O (40 μL) were added in the reaction vial. The vial was capped and allowed to stir at 100 °C for 16 h. After cooling to room temperature, a solution of DMAP (36.7 mg, 0.3 mmol) in toluene (1 mL) was added. The mixture was stirred at 100 °C for 30 min. Upon completion, the mixture was concentrated. The residue was purified by a preparative TLC using hexane/EA (2/1, v/v) as eluent to afford the partially deuterated product **19** (30.4 mg, 92% yield, C<sub>5</sub>:C<sub>6</sub> = 85:15). White solid. TLC: R<sub>f</sub> = 0.3 (hexane/EA = 3/1). mp: 75-77 °C. <sup>1</sup>H NMR (600 MHz, CDCl<sub>3</sub>) δ 8.77 (d, *J* = 1.9 Hz, 1H), 7.93 (s, 1H), 7.87 (s, 1H), 7.70 (d, *J* = 9.0 Hz, 0.22H), 7.40 (s, 0.86H), 4.16 – 4.11 (m, 4H), 3.14 (dt, *J* = 17.9, 7.6 Hz, 4H), 2.72 (t, *J* = 7.5 Hz, 4H), 1.23 (q, *J* = 7.2 Hz, 6H). <sup>13</sup>C NMR (151 MHz, CDCl<sub>3</sub>) δ 172.71, 172.37, 151.78, 147.20, 141.69, 134.18, 132.77, 127.89, 127.64, 126.52, 60.66, 60.56, 35.52, 35.47, 31.06, 28.22, 14.22, 14.20. HRMS (ESI-TOF) *m/z* Calcd for C<sub>19</sub>H<sub>23</sub>DNO<sub>4</sub><sup>+</sup> [M+H]<sup>+</sup> 331.1768, found 331.1769. IR (film) ν<sub>max</sub> 2982, 1729, 1451, 1374, 1276, 1180, 1042, 906, 763, 749 cm<sup>-1</sup>.

**20** was synthesized according to the general procedure 2.6 except using D<sub>2</sub>O instead of H<sub>2</sub>O. Colorless oil. TLC: R<sub>f</sub> = 0.3 (hexane/EA = 5/1). <sup>1</sup>H NMR (600 MHz, CDCl<sub>3</sub>) δ 8.75 (d, *J* = 2.4 Hz, 1H), 7.92 (s, 0.22H), 7.87 (d, *J* = 0.9 Hz, 2H), 4.13 (dd, *J* = 8.2, 7.2 Hz, 4H), 3.32 – 3.29 (m, 2H), 3.11 (d, *J* = 7.6 Hz, 2H), 2.79 – 2.77 (m, 2H), 2.71 (t, *J* = 7.6 Hz, 2H), 1.25 – 1.21 (m, 6H), 1.16 (d, *J* = 3.6 Hz, 21H). <sup>13</sup>C NMR (151 MHz, CDCl<sub>3</sub>) δ 172.58, 172.27, 152.44, 146.61, 142.52, 133.61, 133.42, 132.35, 128.27, 126.27, 122.26, 104.51, 96.12, 60.69, 60.44, 35.31, 34.70, 30.23, 28.19, 18.70, 14.24, 14.20, 11.34. HRMS (ESI-TOF) *m/z* Calcd for C<sub>30</sub>H<sub>43</sub>DNO<sub>4</sub>Si<sup>+</sup> [M+H]<sup>+</sup> 511.3102, found 511.3110. IR (film) ν<sub>max</sub> 2942, 2865, 1734, 1466, 1373, 1293, 1178, 1045, 1018, 883, 791, 675 cm<sup>-1</sup>.

## 2.14 Isotopic Labelling Studies

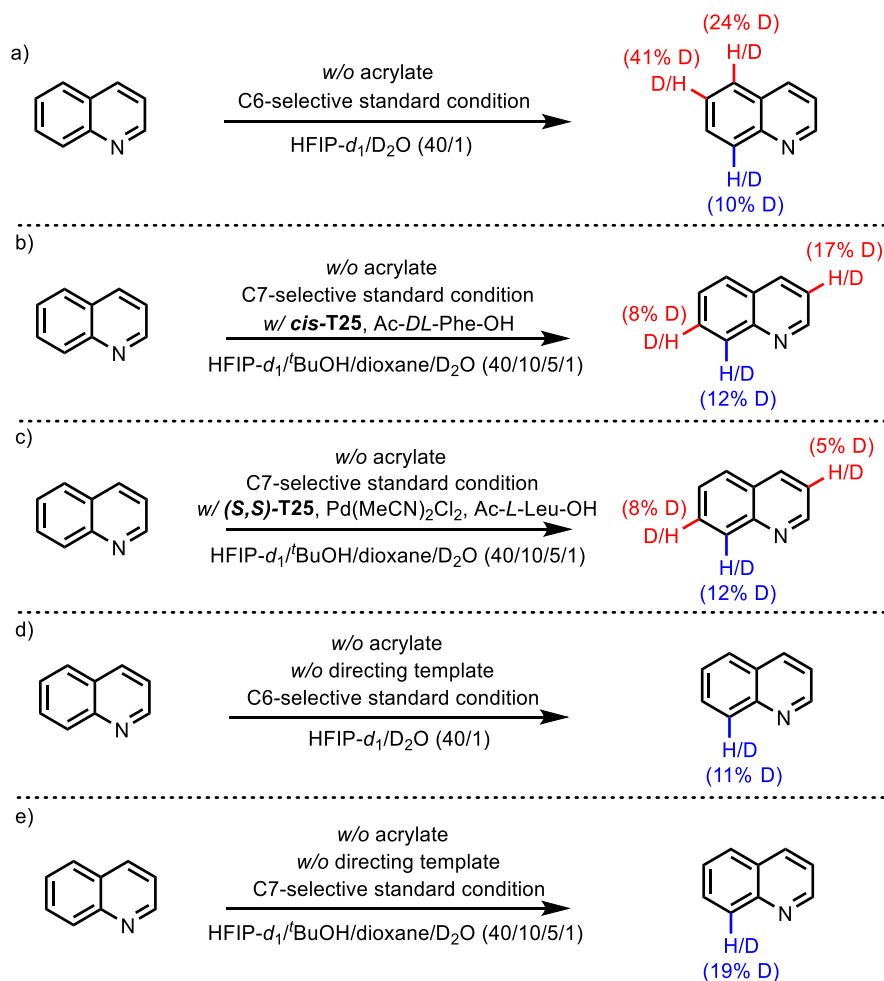

a) A pressure resistant reaction vial was charged with quinoline (2.6 mg, 0.02 mmol), **T12** (2.3 mg, 0.004 mmol), **TC8** (9.4 mg, 0.016 mmol), Pd(OAc)<sub>2</sub> (4.5 mg, 0.02 mmol) and acetone (1 mL). The reaction mixture was stirred at 100 °C for 1 h [Caution: A blast shield was used to mitigate the potential risk of an explosion; we note that in our hands this never occurred] then concentrated *in vacuo*. Pd(OAc)<sub>2</sub> (0.7 mg, 0.003 mmol), Ac-Gly-OH (0.7 mg, 0.006 mmol), Ag<sub>2</sub>CO<sub>3</sub> (16 mg, 0.06 mmol), HFIP-*d*<sub>1</sub> (400 μL), and D<sub>2</sub>O (10 μL) were added in the reaction vial. The vial was capped and allowed to stir at 100 °C for 24 h. After cooling to room temperature, a solution of DMAP (7.3 mg, 0.06 mmol) in toluene (200 μL) was added. The mixture was stirred at 100 °C for 30 min. Upon completion, the mixture was concentrated. The residue was purified by a preparative TLC using hexane/EA (5/1, v/v) as eluent to afford the partially deuterated quinoline. <sup>1</sup>H NMR spectrum was shown below:

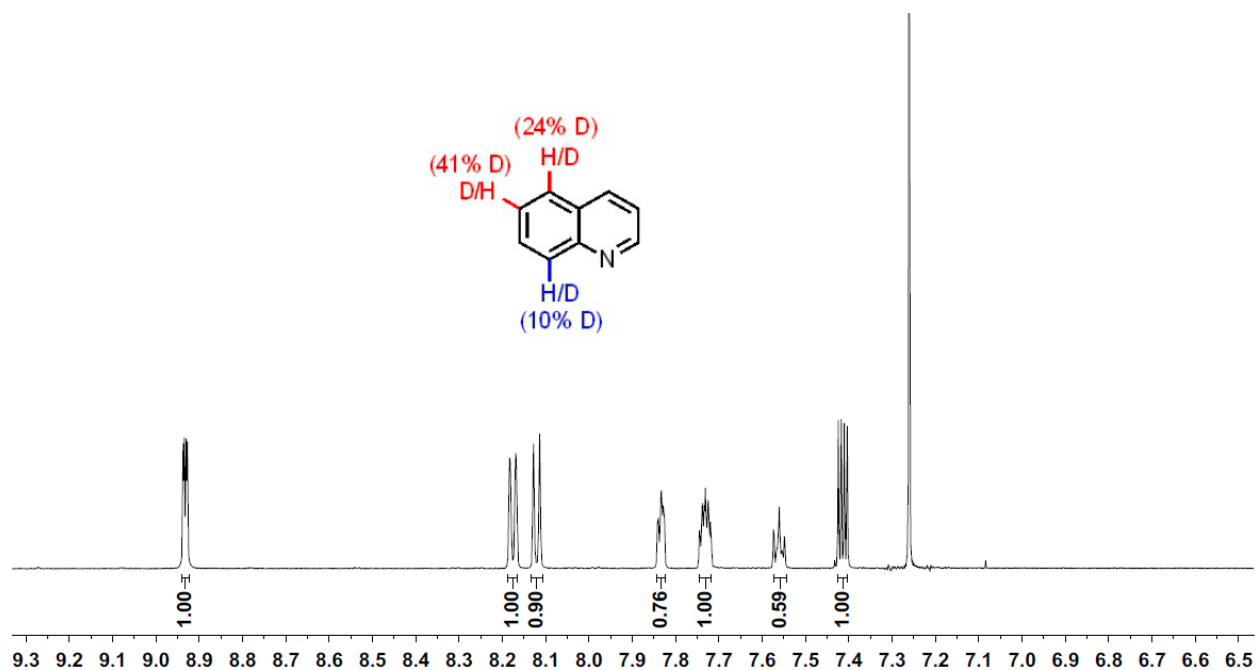

b) A pressure resistant reaction vial was charged with quinoline (2.6 mg, 0.02 mmol), *cis*-**T25** (3 mg, 0.006 mmol), **TC10** (6.1 mg, 0.014 mmol), Pd(OAc)<sub>2</sub> (4.5 mg, 0.02 mmol) and DCM (2 mL). The reaction mixture was stirred at 100 °C for 1 h [Caution: A blast shield was used to mitigate the potential risk of an explosion; we note that in our hands this never occurred] then concentrated *in vacuo*. Pd(OAc)<sub>2</sub> (0.7 mg, 0.003 mmol), Ac-*DL*-Phe-OH (1.2 mg, 0.006 mmol), Ag<sub>2</sub>CO<sub>3</sub> (22 mg, 0.08 mmol), and HFIP-*d*<sub>1</sub>/BuOH/dioxane/D<sub>2</sub>O (400 μL/100 μL/50 μL/10 μL) were added in the reaction vial. The vial was capped and allowed to stir at 110 °C for 24 h. After cooling to room temperature, a solution of DMAP (7.3 mg, 0.06 mmol) in toluene (200 μL) was added. The mixture was stirred at 100 °C for 30 min. Upon completion, the mixture was concentrated. The residue was purified by a preparative TLC using hexane/EA (5/1, v/v) as eluent to afford the partially deuterated quinoline. <sup>1</sup>H NMR spectrum was shown below:

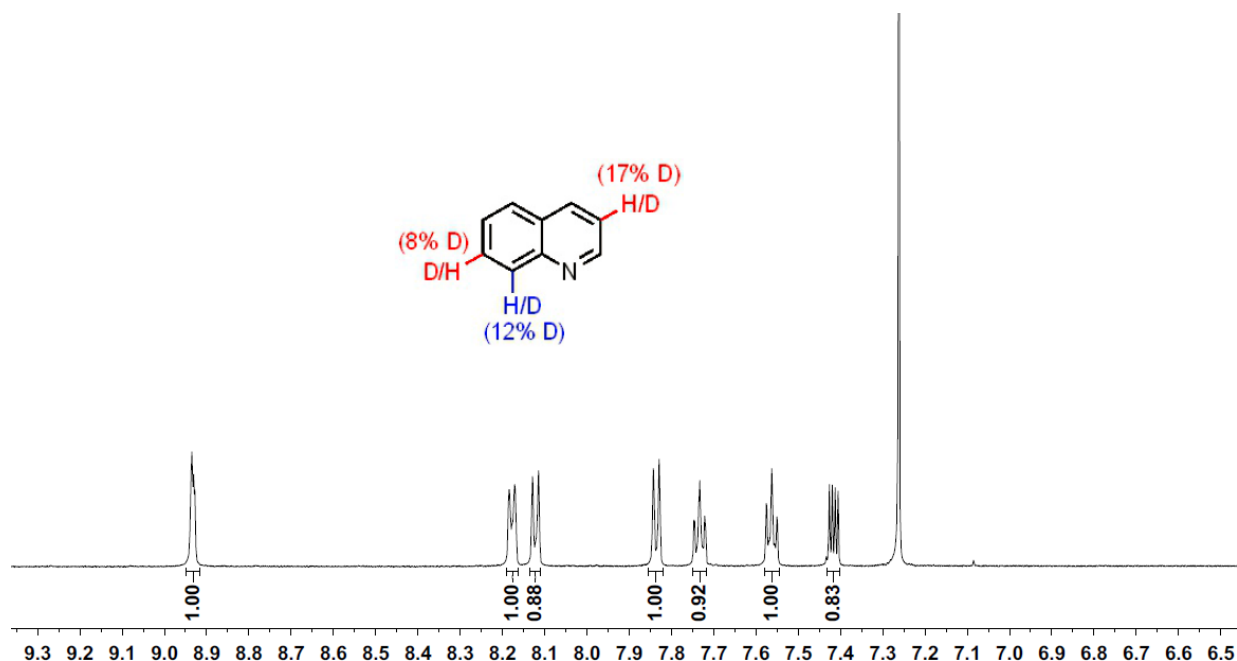

c) A pressure resistant reaction vial was charged with quinoline (2.6 mg, 0.02 mmol), **(S,S)-T25** (3 mg, 0.006 mmol), **TC10** (6.1 mg, 0.014 mmol), Pd(OAc)<sub>2</sub> (4.5 mg, 0.02 mmol) and DCM (2 mL). The reaction mixture was stirred at 100 °C for 1 h [Caution: A blast shield was used to mitigate the potential risk of an explosion; we note that in our hands this never occurred] then concentrated *in vacuo*. Pd(MeCN)<sub>2</sub>Cl<sub>2</sub> (0.8 mg, 0.003 mmol), Ac-*L*-Leu-OH (1.0 mg, 0.006 mmol), Ag<sub>2</sub>CO<sub>3</sub> (22 mg, 0.08 mmol), and HFIP-*d*<sub>1</sub>/BuOH/dioxane/D<sub>2</sub>O (400 μL/100 μL/50 μL/10 μL) were added in the reaction vial. The vial was capped and allowed to stir at 110 °C for 24 h. After cooling to room temperature, a solution of DMAP (7.3 mg, 0.06 mmol) in toluene (200 μL) was added. The mixture was stirred at 100 °C for 30 min. Upon completion, the mixture was concentrated. The residue was purified by a preparative TLC using hexane/EA (5/1, v/v) as eluent to afford the partially deuterated quinoline. <sup>1</sup>H NMR spectrum was shown below:



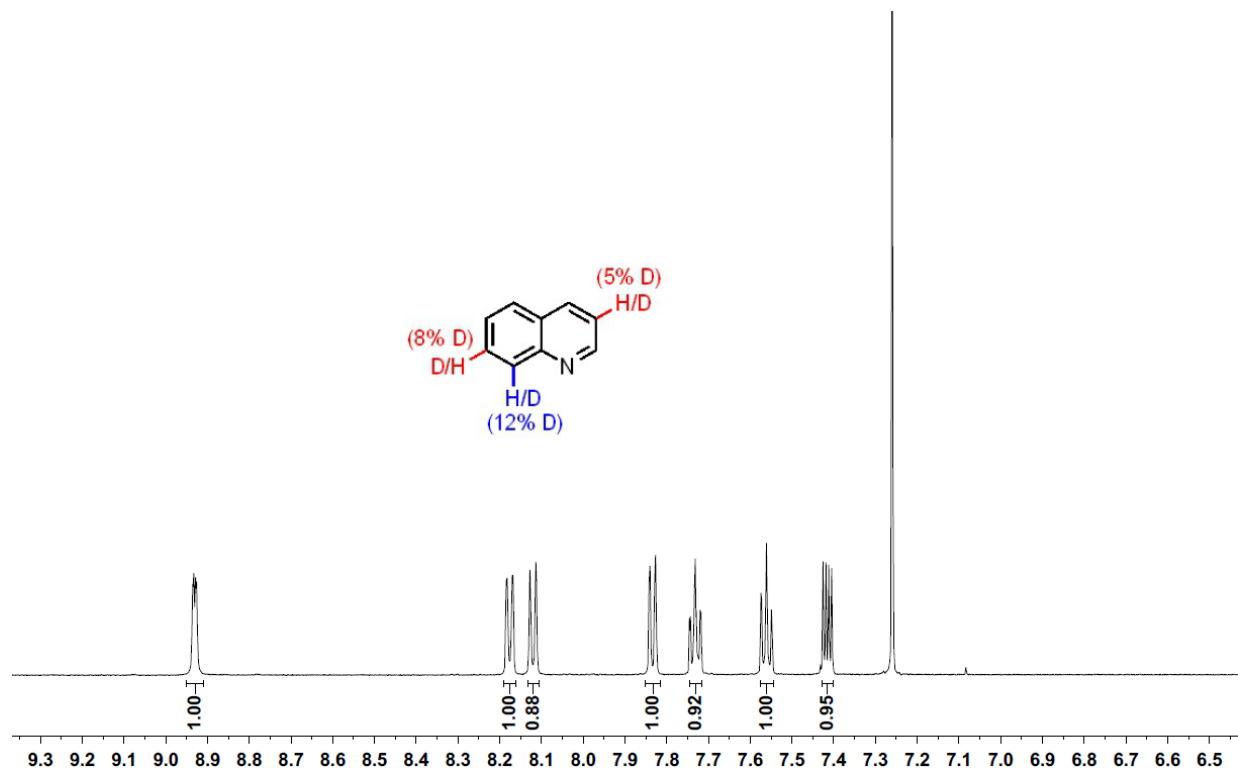

d) A pressure resistant reaction vial was charged with quinoline (2.6 mg, 0.02 mmol), **TC8** (11.8 mg, 0.02 mmol), Pd(OAc)<sub>2</sub> (4.5 mg, 0.02 mmol) and acetone (1 mL). The reaction mixture was stirred at 100 °C for 1 h [Caution: A blast shield was used to mitigate the potential risk of an explosion; we note that in our hands this never occurred] then concentrated *in vacuo*. Pd(OAc)<sub>2</sub> (0.7 mg, 0.003 mmol), Ac-Gly-OH (0.7 mg, 0.006 mmol), Ag<sub>2</sub>CO<sub>3</sub> (16 mg, 0.06 mmol), HFIP-*d*<sub>1</sub> (400 μL), and D<sub>2</sub>O (10 μL) were added in the reaction vial. The vial was capped and allowed to stir at 100 °C for 24 h. After cooling to room temperature, a solution of DMAP (7.3 mg, 0.06 mmol) in toluene (200 μL) was added. The mixture was stirred at 100 °C for 30 min. Upon completion, the mixture was concentrated. The residue was purified by a preparative TLC using hexane/EA (5/1, v/v) as eluent to afford the partially deuterated quinoline. <sup>1</sup>H NMR spectrum was shown below:

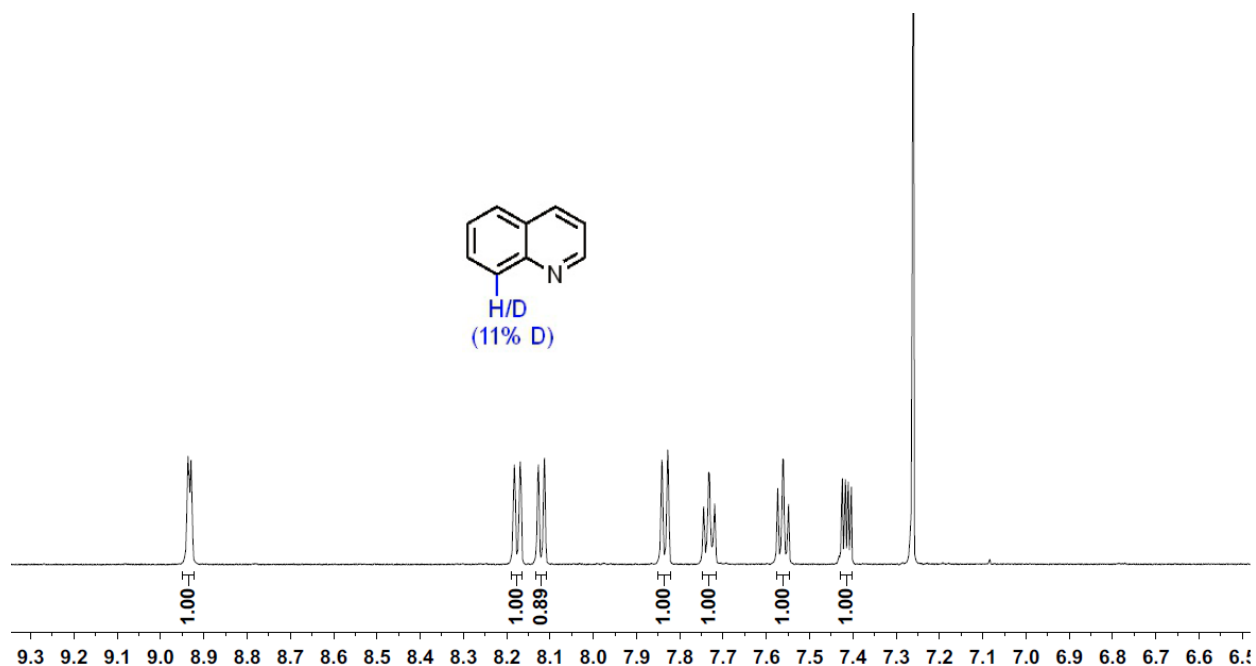

e) A pressure resistant reaction vial was charged with quinoline (2.6 mg, 0.02 mmol), **TC10** (8.7 mg, 0.02 mmol), Pd(OAc)<sub>2</sub> (4.5 mg, 0.02 mmol) and DCM (2 mL). The reaction mixture was stirred at 100 °C for 1 h [Caution: A blast shield was used to mitigate the potential risk of an explosion; we note that in our hands this never occurred] then concentrated *in vacuo*. Pd(OAc)<sub>2</sub> (0.7 mg, 0.003 mmol), Ac-*DL*-Phe-OH (1.2 mg, 0.006 mmol), Ag<sub>2</sub>CO<sub>3</sub> (22 mg, 0.08 mmol), and HFIP-*d*<sub>1</sub>/tBuOH/dioxane/D<sub>2</sub>O (400 μL/100 μL/50 μL/10 μL) were added in the reaction vial. The vial was capped and allowed to stir at 110 °C for 24 h. After cooling to room temperature, a solution of DMAP (7.3 mg, 0.06 mmol) in toluene (200 μL) was added. The mixture was stirred at 100 °C for 30 min. Upon completion, the mixture was concentrated. The residue was purified by a preparative TLC using hexane/EA (5/1, v/v) as eluent to afford the partially deuterated quinoline. <sup>1</sup>H NMR spectrum was shown below:

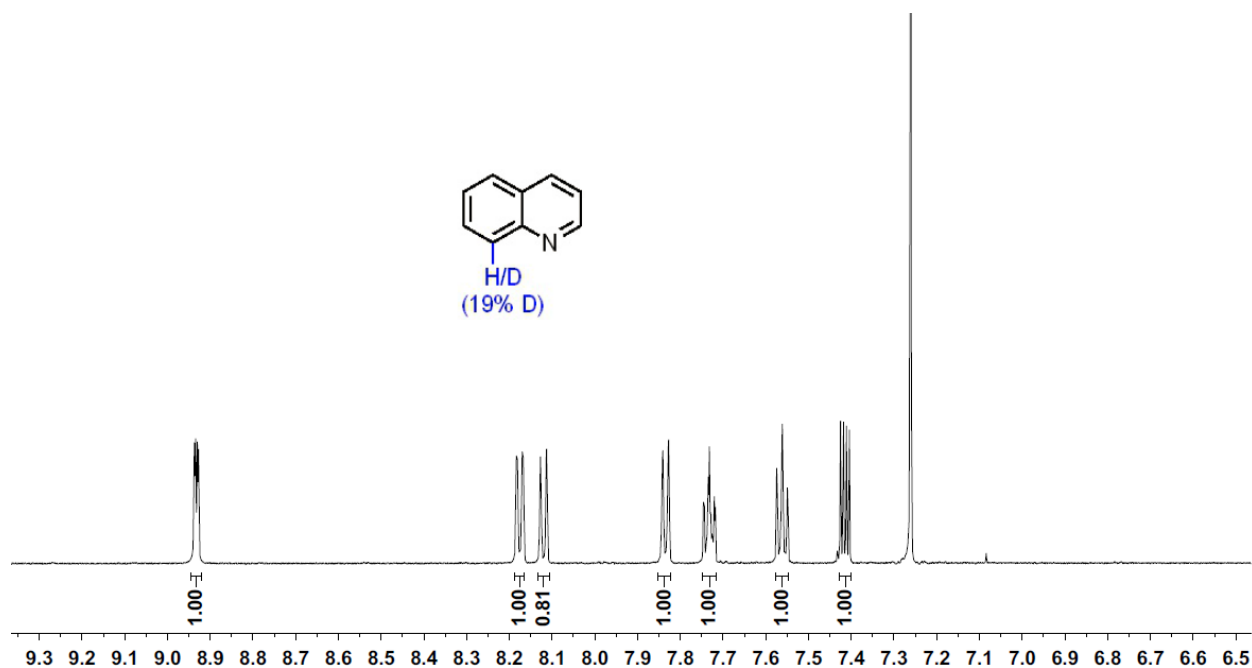

## 2.15 Kinetic Isotope Effect (KIE) Studies

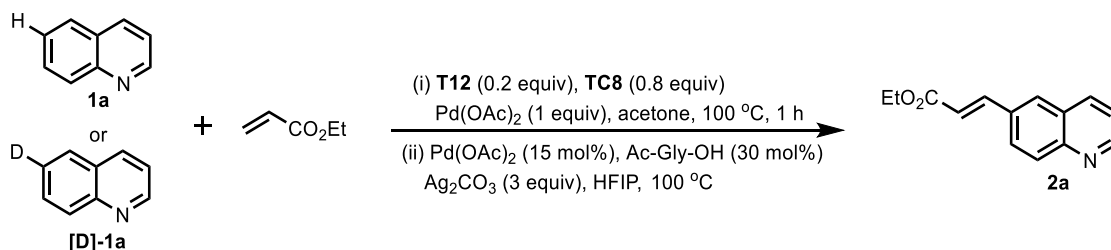

To 5 sets of pressure resistant vials were charged with **1a** (2.6 mg, 0.02 mmol) or **[D]-1a**<sup>14</sup> (2.6 mg, 0.02 mmol), **T12** (2.3 mg, 0.004 mmol), **TC8** (9.4 mg, 0.016 mmol), Pd(OAc)<sub>2</sub> (4.5 mg, 0.02 mmol) and acetone (0.5 mL). The reaction mixture was stirred at 100 °C for 1 h [Caution: A blast shield was used to mitigate the potential risk of an explosion; we note that in our hands this never occurred] then concentrated *in vacuo*. Pd(OAc)<sub>2</sub> (0.7 mg, 0.003 mmol), Ac-Gly-OH (0.7 mg, 0.006 mmol), Ag<sub>2</sub>CO<sub>3</sub> (16 mg, 0.06 mmol), HFIP (400 μL), and ethyl acrylate (6.5 μL, 0.06 mmol) were added in the reaction vials. The vials were capped and allowed to stir at 100 °C. The reactions were monitored and removed 1 set of reactions after 20 min. The vials were quickly cooled to room temperature using dry ice. A solution of DMAP (7.3 mg, 0.06 mmol) in toluene (0.2 mL) was added. The mixture was stirred at 100 °C for 30 min. Upon completion, the mixture was passed through a short pad of silica (in the glass dropper) using hexane/EA (1/1, v/v)

as the eluent to give the product mixture for  $^1\text{H}$  NMR analysis. The processes have been monitored up to 100 min and provided the following yields:

| Time (min)                                 | 20   | 40   | 60   | 80   | 100  |
|--------------------------------------------|------|------|------|------|------|
| <b>2a</b> (from <b>[D]</b> - <b>1a</b> )/% | 16.5 | 17.3 | 22.3 | 24.5 | 25.3 |
| <b>2a</b> (from <b>1a</b> )/%              | 23.0 | 29.8 | 32.3 | 33.0 | 34.2 |

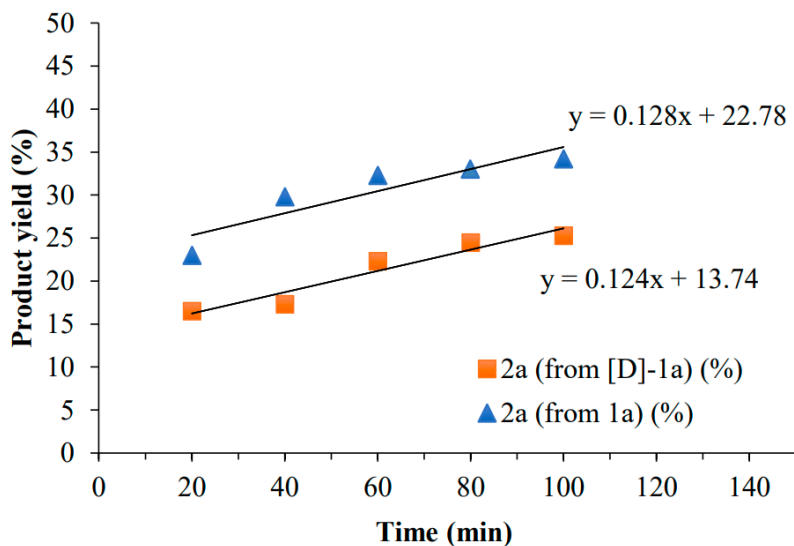

For C6-H activation,  $k_{\text{H}}/k_{\text{D}} = 0.128/0.124 = 1.03$ .

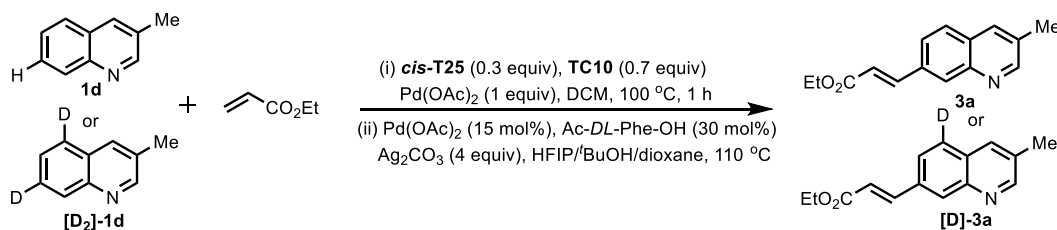

To 5 sets of pressure resistant vials were charged with **1d** (2.8 mg, 0.02 mmol) or **[D<sub>2</sub>]-1d**<sup>15</sup> (2.9 mg, 0.02 mmol), *cis*-**T25** (3 mg, 0.006 mmol), **TC10** (6 mg, 0.014 mmol), Pd(OAc)<sub>2</sub> (4.5 mg, 0.02 mmol) and DCM (1 mL). The reaction mixture was stirred at 100 °C for 1 h [Caution: A blast shield was used to mitigate the potential risk of an explosion; we note that in our hands this never occurred] then concentrated *in vacuo*. Pd(OAc)<sub>2</sub> (0.7 mg, 0.003 mmol), Ac-*DL*-Phe-OH (1.2 mg, 0.006 mmol), Ag<sub>2</sub>CO<sub>3</sub> (11 mg, 0.08 mmol), HFIP/*t*BuOH/dioxane (1.6 mL/400 μL/200 μL), and ethyl acrylate (8.6 μL, 0.08 mmol) were added in the reaction vials. The vials were

capped and allowed to stir at 110 °C. The reactions were monitored and removed 1 set of reactions after 20 min. The vials were quickly cooled to room temperature using dry ice. A solution of DMAP (7.3 mg, 0.06 mmol) in toluene (0.2 mL) was added. The mixture was stirred at 110 °C for 30 min. Upon completion, the mixture was passed through a short pad of silica (in the glass dropper) using hexane/EA (1/1, v/v) as the eluent to give the product mixture for <sup>1</sup>H NMR analysis. The processes have been monitored up to 100 min and provided the following yields:

| Time (min)                                            | 20   | 40   | 60   | 80   | 100  |
|-------------------------------------------------------|------|------|------|------|------|
| [D]- <b>3a</b> (from [D <sub>2</sub> ]- <b>1d</b> )/% | 8.1  | 9.9  | 11.7 | 14.6 | 16.2 |
| <b>3a</b> (from <b>1d</b> )/%                         | 15.3 | 16.1 | 18.1 | 20.9 | 24.1 |

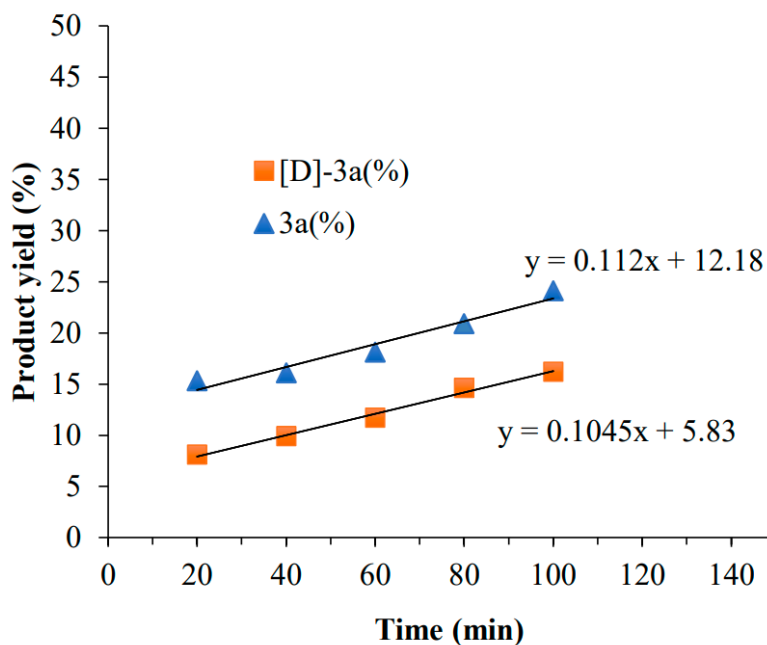

For C7-H activation,  $k_H/k_D = 0.112/0.1045 = 1.07$ .

## 2.16 Spectroscopic Data of Compounds

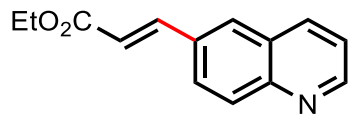

**Ethyl (*E*)-3-(quinolin-6-yl)acrylate (2a)** The general procedure 2.4 was followed and purification by preparative TLC (hexane/EA = 3/1) furnished compound **2a** as colorless oil (18.6 mg, 82%, C6:others = 92:8). TLC:  $R_f$  = 0.3 (hexane/EA = 5/1).  $^1\text{H}$  NMR (600 MHz,  $\text{CDCl}_3$ )  $\delta$  8.93 (dd,  $J$  = 4.2, 1.6 Hz, 1H), 8.18 (d,  $J$  = 8.2 Hz, 1H), 8.11 (d,  $J$  = 9.3 Hz, 1H), 7.91 (dd,  $J$  = 4.6, 2.6 Hz, 2H), 7.85 (d,  $J$  = 16.0 Hz, 1H), 7.44 (dd,  $J$  = 8.3, 4.3 Hz, 1H), 6.58 (d,  $J$  = 16.0 Hz, 1H), 4.30 (q,  $J$  = 7.2 Hz, 2H), 1.37 (t,  $J$  = 7.1 Hz, 3H).  $^{13}\text{C}$  NMR (151 MHz,  $\text{CDCl}_3$ )  $\delta$  166.80, 151.34, 149.04, 143.61, 136.48, 132.73, 130.27, 129.23, 128.27, 127.28, 121.87, 119.65, 60.69, 14.34. HRMS (ESI-TOF)  $m/z$  Calcd for  $\text{C}_{14}\text{H}_{14}\text{NO}_2^+$   $[\text{M}+\text{H}]^+$  228.1025, found 228.1028. IR (film)  $\nu_{\text{max}}$  2982, 1708, 1636, 1501, 1369, 1280, 1265, 1176, 1036, 981, 835  $\text{cm}^{-1}$ .

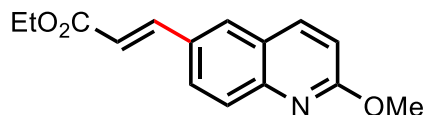

**Ethyl (*E*)-3-(2-methoxyquinolin-6-yl)acrylate (2b)** The general procedure 2.4 was followed and purification by preparative TLC (hexane/EA = 10/1) furnished compound **2b** as a white solid (12.6 mg, 49%, C6:others = 93:7). TLC:  $R_f$  = 0.3 (hexane/EA = 15/1). mp: 67-69 °C.  $^1\text{H}$  NMR (600 MHz,  $\text{CDCl}_3$ )  $\delta$  7.97 (d,  $J$  = 8.8 Hz, 1H), 7.84 – 7.79 (m, 4H), 6.92 (d,  $J$  = 8.8 Hz, 1H), 6.51 (d,  $J$  = 16.0 Hz, 1H), 4.29 (q,  $J$  = 7.1 Hz, 2H), 4.08 (s, 3H), 1.36 (t,  $J$  = 7.1 Hz, 3H).  $^{13}\text{C}$  NMR (151 MHz,  $\text{CDCl}_3$ )  $\delta$  167.05, 163.26, 147.82, 144.10, 138.90, 130.25, 128.79, 127.98, 127.61, 124.97, 118.04, 113.90, 60.53, 53.60, 14.36. HRMS (ESI-TOF)  $m/z$  Calcd for  $\text{C}_{15}\text{H}_{16}\text{NO}_3^+$   $[\text{M}+\text{H}]^+$  258.1130, found 258.1132. IR (film)  $\nu_{\text{max}}$  2983, 1707, 1617, 1600, 1478, 1389, 1368, 1278, 1230, 1162, 1024, 980, 827  $\text{cm}^{-1}$ .

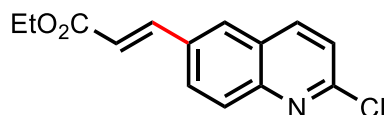

**Ethyl (*E*)-3-(2-chloroquinolin-6-yl)acrylate (2c)** The general procedure 2.4 was followed and purification by preparative TLC (hexane/EA = 10/1) furnished compound **2c** as a white solid (11.5 mg, 44%, C6:others = 96:4). TLC:  $R_f = 0.3$  (hexane/EA = 15/1). mp: 107-109 °C.  $^1\text{H}$  NMR (600 MHz,  $\text{CDCl}_3$ )  $\delta$  8.12 (d,  $J = 8.6$  Hz, 1H), 8.02 (d,  $J = 8.8$  Hz, 1H), 7.92 (dd,  $J = 8.8, 1.9$  Hz, 1H), 7.90 (s, 1H), 7.82 (d,  $J = 16.0$  Hz, 1H), 7.43 (d,  $J = 8.6$  Hz, 1H), 6.57 (d,  $J = 16.0$  Hz, 1H), 4.30 (q,  $J = 7.3$  Hz, 2H), 1.36 (t,  $J = 7.1$  Hz, 3H).  $^{13}\text{C}$  NMR (151 MHz,  $\text{CDCl}_3$ )  $\delta$  166.65, 151.76, 148.58, 143.13, 139.11, 133.19, 129.35, 128.65, 128.51, 126.86, 123.21, 120.11, 60.78, 14.34. HRMS (ESI-TOF)  $m/z$  Calcd for  $\text{C}_{14}\text{H}_{13}\text{ClNO}_2^+$   $[\text{M}+\text{H}]^+$  262.0635, found 262.0634. IR (film)  $\nu_{\text{max}}$  2981, 1711, 1642, 1579, 1453, 1341, 1284, 1244, 1163, 1096, 983, 830, 733  $\text{cm}^{-1}$ .

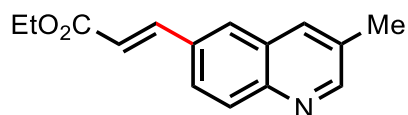

**Ethyl (*E*)-3-(3-methylquinolin-6-yl)acrylate (2d)** The general procedure 2.4 was followed and purification by preparative TLC (hexane/EA = 3/1) furnished compound **2d** as a white solid (18 mg, 75%, C6:others = 93:7). TLC:  $R_f = 0.3$  (hexane/EA = 5/1). mp: 67-69 °C.  $^1\text{H}$  NMR (600 MHz,  $\text{CDCl}_3$ )  $\delta$  8.78 (d,  $J = 2.1$  Hz, 1H), 8.05 (d,  $J = 9.4$  Hz, 1H), 7.92 (s, 1H), 7.85 – 7.82 (m, 3H), 6.56 (d,  $J = 16.0$  Hz, 1H), 4.30 (q,  $J = 7.1$  Hz, 2H), 2.53 (s, 3H), 1.36 (t,  $J = 7.1$  Hz, 3H).  $^{13}\text{C}$  NMR (151 MHz,  $\text{CDCl}_3$ )  $\delta$  166.87, 153.36, 147.33, 143.85, 135.06, 132.69, 131.41, 129.97, 128.71, 128.12, 126.26, 119.34, 60.66, 18.78, 14.35. HRMS (ESI-TOF)  $m/z$  Calcd for  $\text{C}_{15}\text{H}_{16}\text{NO}_2^+$   $[\text{M}+\text{H}]^+$  242.1181, found 242.1182. IR (film)  $\nu_{\text{max}}$  2981, 1707, 1636, 1502, 1440, 1367, 1340, 1304, 1284, 1162, 1038, 980, 831  $\text{cm}^{-1}$ .

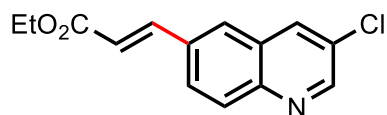

**Ethyl (*E*)-3-(3-chloroquinolin-6-yl)acrylate (2e)** The general procedure 2.4 was followed and purification by preparative TLC (hexane/EA = 10/1) furnished compound **2e** as a white solid (17.5 mg, 67%, C6:others = 98:2). TLC:  $R_f = 0.3$  (hexane/EA = 15/1). mp: 96-98 °C.  $^1\text{H}$  NMR (600 MHz,  $\text{CDCl}_3$ )  $\delta$  8.82 (d,  $J = 2.4$  Hz, 1H), 8.14 (d,  $J = 2.7$  Hz, 1H), 8.08 (d,  $J = 8.8$  Hz, 1H), 7.89 (dd,  $J = 8.8, 2.0$  Hz, 1H), 7.84 – 7.80 (m, 2H), 6.58 (d,  $J = 16.0$  Hz, 1H), 4.31 (q,  $J = 7.1$  Hz, 2H), 1.37 (t,  $J = 7.2$  Hz, 3H).  $^{13}\text{C}$  NMR (151 MHz,  $\text{CDCl}_3$ )  $\delta$  166.58, 150.51, 146.90,

143.08, 134.22, 133.86, 130.23, 129.31, 128.49, 128.10, 127.45, 120.39, 60.79, 14.33. HRMS (ESI-TOF)  $m/z$  Calcd for  $C_{14}H_{13}ClNO_2^+$   $[M+H]^+$  262.0635, found 262.0632. IR (film)  $\nu_{max}$  2990, 1706, 1636, 1331, 1282, 1179, 1091, 1034, 974, 825, 737  $cm^{-1}$ .

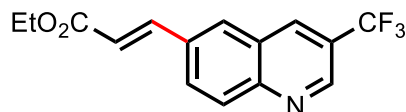

**Ethyl (E)-3-(3-(trifluoromethyl)quinolin-6-yl)acrylate (2f)** The general procedure 2.4 was followed and purification by preparative TLC (hexane/EA = 10/1) furnished compound **2f** as a white solid (19.2 mg, 65%, C6:others = 91:9). TLC:  $R_f$  = 0.3 (hexane/EA = 15/1). mp: 139-141 °C.  $^1H$  NMR (600 MHz,  $CDCl_3$ )  $\delta$  9.11 (d,  $J$  = 2.0 Hz, 1H), 8.46 (s, 1H), 8.19 (d,  $J$  = 8.8 Hz, 1H), 8.04 (dd,  $J$  = 8.8, 2.0 Hz, 1H), 8.01 (s, 1H), 7.85 (d,  $J$  = 16.0 Hz, 1H), 6.62 (d,  $J$  = 16.0 Hz, 1H), 4.32 (q,  $J$  = 7.1 Hz, 2H), 1.37 (t,  $J$  = 7.1 Hz, 3H).  $^{13}C$  NMR (151 MHz,  $CDCl_3$ )  $\delta$  166.49, 150.01, 146.88 (q,  $J$  = 3.5 Hz), 142.71, 134.33 – 134.02 (m), 130.42, 129.55, 129.51, 126.40, 124.42 (q,  $J$  = 32.9 Hz), 122.58, 120.86, 60.87, 14.33.  $^{19}F$  NMR (376 MHz,  $CDCl_3$ )  $\delta$  -64.62. HRMS (ESI-TOF)  $m/z$  Calcd for  $C_{15}H_{13}F_3NO_2^+$   $[M+H]^+$  296.0898, found 296.0898. IR (film)  $\nu_{max}$  2998, 1704, 1637, 1354, 1321, 1245, 1222, 1157, 1122, 979, 928, 841  $cm^{-1}$ .

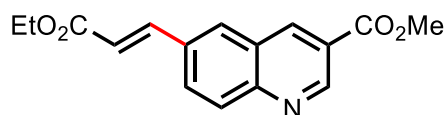

**Methyl (E)-6-(3-ethoxy-3-oxoprop-1-en-1-yl)quinoline-3-carboxylate (2g)** The general procedure 2.4 was followed and purification by preparative TLC (hexane/EA = 3/1) furnished compound **2g** as a white solid (23.9 mg, 84%, C6:others = 93:7). TLC:  $R_f$  = 0.3 (hexane/EA = 5/1). mp: 156-158 °C.  $^1H$  NMR (600 MHz,  $CDCl_3$ )  $\delta$  9.45 (d,  $J$  = 2.1 Hz, 1H), 8.85 (d,  $J$  = 1.3 Hz, 1H), 8.16 (d,  $J$  = 9.5 Hz, 1H), 8.02 – 8.00 (m, 2H), 7.85 (d,  $J$  = 16.0 Hz, 1H), 6.60 (d,  $J$  = 16.0 Hz, 1H), 4.31 (q,  $J$  = 7.1 Hz, 2H), 4.04 (s, 3H), 1.37 (t,  $J$  = 7.1 Hz, 3H).  $^{13}C$  NMR (151 MHz,  $CDCl_3$ )  $\delta$  166.57, 165.56, 150.89, 150.52, 142.94, 138.98, 133.67, 130.29, 130.09, 129.59, 126.95, 123.77, 120.44, 60.81, 52.63, 14.33. HRMS (ESI-TOF)  $m/z$  Calcd for  $C_{16}H_{16}NO_4^+$   $[M+H]^+$  286.1079, found 286.1078. IR (film)  $\nu_{max}$  1722, 1703, 1636, 1447, 1347, 1313, 1291, 1238, 1187, 1102, 991, 937, 841  $cm^{-1}$ .



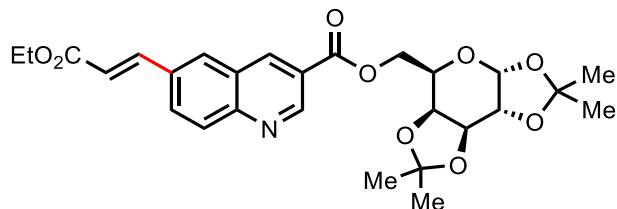

**((3aR,5R,5aS,8aS,8bR)-2,2,7,7-Tetramethyltetrahydro-5H-bis([1,3]dioxolo)[4,5-b:4',5'-d]pyran-5-yl)methyl 6-((E)-3-ethoxy-3-oxoprop-1-en-1-yl)quinoline-3-carboxylate (2h)** The general procedure 2.4 was followed and purification by preparative TLC (hexane/EA = 3/1) furnished compound **2h** as a white solid (44.6 mg, 87%, C6:others = 93:7). TLC:  $R_f$  = 0.3 (hexane/EA = 5/1). mp: 135-137 °C.  $^1\text{H}$  NMR (600 MHz,  $\text{CDCl}_3$ )  $\delta$  9.46 (d,  $J$  = 2.1 Hz, 1H), 8.85 (d,  $J$  = 1.9 Hz, 1H), 8.16 (d,  $J$  = 9.4 Hz, 1H), 8.02 – 8.00 (m, 2H), 7.85 (d,  $J$  = 16.0 Hz, 1H), 6.60 (d,  $J$  = 16.0 Hz, 1H), 5.59 (d,  $J$  = 5.0 Hz, 1H), 4.68 (dd,  $J$  = 7.9, 2.5 Hz, 1H), 4.63 – 4.54 (m, 2H), 4.38 – 4.35 (m, 2H), 4.31 (q,  $J$  = 7.1 Hz, 2H), 4.25 (ddd,  $J$  = 7.8, 4.5, 1.9 Hz, 1H), 1.52 (d,  $J$  = 21.7 Hz, 6H), 1.39 – 1.34 (m, 9H).  $^{13}\text{C}$  NMR (151 MHz,  $\text{CDCl}_3$ )  $\delta$  166.58, 164.96, 150.97, 150.56, 142.96, 139.09, 133.64, 130.28, 130.15, 129.60, 126.92, 123.70, 120.42, 109.84, 108.89, 96.35, 71.16, 70.79, 70.51, 66.13, 64.64, 60.80, 26.07, 26.00, 24.97, 24.51, 14.34. HRMS (ESI-TOF)  $m/z$  Calcd for  $\text{C}_{27}\text{H}_{32}\text{NO}_9^+$   $[\text{M}+\text{H}]^+$  514.2077, found 514.2077.  $[\alpha]_D^{21} = -46.9$  ( $c$  0.1,  $\text{CHCl}_3$ ). IR (film)  $\nu_{\text{max}}$  2985, 2935, 1716, 1639, 1380, 1289, 1253, 1212, 1168, 1103, 1069, 1004, 896, 838  $\text{cm}^{-1}$ .

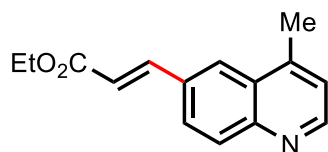

**Ethyl (E)-3-(4-methylquinolin-6-yl)acrylate (2i)** The general procedure 2.4 was followed and purification by preparative TLC (hexane/EA = 3/1) furnished compound **2i** as a white solid (12.3 mg, 51%, C6:others = 89:11). TLC:  $R_f$  = 0.3 (hexane/EA = 5/1). mp: 105-107 °C.  $^1\text{H}$  NMR (600 MHz,  $\text{CDCl}_3$ )  $\delta$  8.78 (d,  $J$  = 4.3 Hz, 1H), 8.10 – 8.06 (m, 2H), 7.91 – 7.86 (m, 2H), 7.26 (d,  $J$  = 4.5 Hz, 1H), 6.58 (d,  $J$  = 16.0 Hz, 1H), 4.31 (q,  $J$  = 7.1 Hz, 2H), 2.72 (s, 3H), 1.37 (t,  $J$  = 7.2 Hz, 3H).  $^{13}\text{C}$  NMR (151 MHz,  $\text{CDCl}_3$ )  $\delta$  166.83, 151.08, 148.83, 144.85, 144.02, 132.37, 130.81, 128.30, 126.82, 125.62, 122.63, 119.39, 60.67, 18.63, 14.36. HRMS (ESI-TOF)  $m/z$  Calcd for

$C_{15}H_{16}NO_2^+$   $[M+H]^+$  242.1181, found 242.1181. IR (film)  $\nu_{max}$  2981, 1707, 1635, 1590, 1443, 1369, 1314, 1281, 1265, 1174, 1036, 980, 844  $cm^{-1}$ .

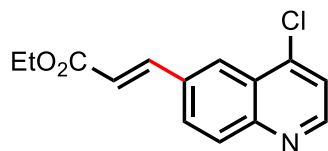

**Ethyl (*E*)-3-(4-chloroquinolin-6-yl)acrylate (**2j**)** The general procedure 2.4 was followed and purification by preparative TLC (hexane/EA = 5/1) furnished compound **2j** as a white solid (15.4 mg, 59%, C6:others = 91:9). TLC:  $R_f$  = 0.3 (hexane/EA = 10/1). mp: 109-111 °C.  $^1H$  NMR (600 MHz,  $CDCl_3$ )  $\delta$  8.79 (d,  $J$  = 4.7 Hz, 1H), 8.32 (d,  $J$  = 1.9 Hz, 1H), 8.12 (d,  $J$  = 8.8 Hz, 1H), 7.95 (dd,  $J$  = 8.8, 2.0 Hz, 1H), 7.89 (d,  $J$  = 16.0 Hz, 1H), 7.52 (d,  $J$  = 4.7 Hz, 1H), 6.62 (d,  $J$  = 16.0 Hz, 1H), 4.31 (q,  $J$  = 7.1 Hz, 2H), 1.37 (t,  $J$  = 7.2 Hz, 3H).  $^{13}C$  NMR (151 MHz,  $CDCl_3$ )  $\delta$  166.58, 150.71, 149.82, 143.26, 143.03, 133.78, 130.68, 128.25, 126.64, 125.35, 121.98, 120.49, 60.79, 14.34. HRMS (ESI-TOF)  $m/z$  Calcd for  $C_{14}H_{13}ClNO_2^+$   $[M+H]^+$  262.0635, found 262.0637. IR (film)  $\nu_{max}$  2983, 1711, 1638, 1501, 1445, 1366, 1309, 1262, 1177, 1161, 1037, 982, 844, 763  $cm^{-1}$ .

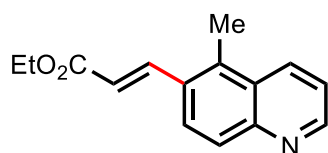

**Ethyl (*E*)-3-(5-methylquinolin-6-yl)acrylate (**2k**)** The general procedure 2.4 was followed and purification by preparative TLC (hexane/EA = 3/1) furnished compound **2k** as a pale yellow solid (8.7 mg, 36%, C6:others = 96:4). TLC:  $R_f$  = 0.3 (hexane/EA = 5/1). mp: 64-66 °C.  $^1H$  NMR (600 MHz,  $CDCl_3$ )  $\delta$  8.92 (dd,  $J$  = 4.2, 1.6 Hz, 1H), 8.44 (d,  $J$  = 8.5 Hz, 1H), 8.26 (d,  $J$  = 15.8 Hz, 1H), 7.96 (d,  $J$  = 8.6 Hz, 1H), 7.87 (d,  $J$  = 8.9 Hz, 1H), 7.46 (dd,  $J$  = 8.6, 4.2 Hz, 1H), 6.49 (d,  $J$  = 15.8 Hz, 1H), 4.30 (t,  $J$  = 7.1 Hz, 2H), 2.77 (s, 3H), 1.37 (t,  $J$  = 7.2 Hz, 3H).  $^{13}C$  NMR (151 MHz,  $CDCl_3$ )  $\delta$  166.94, 150.60, 149.00, 141.91, 134.66, 133.09, 130.83, 128.13, 127.95, 127.43, 121.38, 120.94, 60.69, 14.35, 14.20. HRMS (ESI-TOF)  $m/z$  Calcd for  $C_{15}H_{16}NO_2^+$   $[M+H]^+$  242.1181, found 242.1183. IR (film)  $\nu_{max}$  2981, 1711, 1630, 1377, 1289, 1251, 1177, 1035, 979, 836, 809  $cm^{-1}$ .

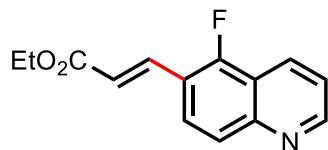

**Ethyl (*E*)-3-(5-fluoroquinolin-6-yl)acrylate (**2l**)** The general procedure 2.4 was followed and purification by preparative TLC (hexane/EA = 3/1) furnished compound **2l** as a white solid (11.5 mg, 47%, C6:others = 97:3). TLC:  $R_f = 0.3$  (hexane/EA = 5/1). mp: 48-50 °C.  $^1\text{H}$  NMR (600 MHz,  $\text{CDCl}_3$ )  $\delta$  8.97 (dd,  $J = 4.2, 1.7$  Hz, 1H), 8.48 (ddd,  $J = 8.5, 1.8, 0.8$  Hz, 1H), 8.06 (d,  $J = 16.2$  Hz, 1H), 7.91 (d,  $J = 9.0$  Hz, 1H), 7.85 (dd,  $J = 8.9, 7.6$  Hz, 1H), 7.50 (dd,  $J = 8.5, 4.2$  Hz, 1H), 6.64 (d,  $J = 16.2$  Hz, 1H), 4.31 (q,  $J = 7.1$  Hz, 2H), 1.37 (t,  $J = 7.1$  Hz, 3H).  $^{13}\text{C}$  NMR (151 MHz,  $\text{CDCl}_3$ )  $\delta$  166.59, 156.26 (d,  $J = 263.7$  Hz), 151.94, 149.59 (d,  $J = 3.4$  Hz), 135.82 (d,  $J = 3.9$  Hz), 129.92 (d,  $J = 5.9$  Hz), 127.00 (d,  $J = 3.9$  Hz), 125.80 (d,  $J = 4.3$  Hz), 121.86 (d,  $J = 3.2$  Hz), 121.33 (d,  $J = 5.8$  Hz), 119.18 (d,  $J = 16.6$  Hz), 117.54 (d,  $J = 10.4$  Hz), 60.80, 14.33.  $^{19}\text{F}$  NMR (376 MHz,  $\text{CDCl}_3$ )  $\delta$  -125.88. HRMS (ESI-TOF)  $m/z$  Calcd for  $\text{C}_{14}\text{H}_{13}\text{FNO}_2^+$   $[\text{M}+\text{H}]^+$  246.0930, found 246.0932. IR (film)  $\nu_{\text{max}}$  2981, 1711, 1638, 1383, 1295, 1256, 1177, 1065, 1038, 983, 831, 811  $\text{cm}^{-1}$ .

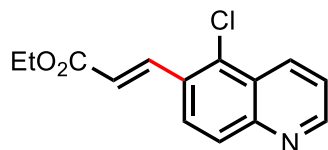

**Ethyl (*E*)-3-(5-chloroquinolin-6-yl)acrylate (**2m**)** The general procedure 2.4 was followed and purification by preparative TLC (hexane/EA = 3/1) furnished compound **2m** as a white solid (9.6 mg, 37%, C6:others = 97:3). TLC:  $R_f = 0.3$  (hexane/EA = 5/1). mp: 88-90 °C.  $^1\text{H}$  NMR (600 MHz,  $\text{CDCl}_3$ )  $\delta$  8.97 (dd,  $J = 4.2, 1.7$  Hz, 1H), 8.68 (ddd,  $J = 8.6, 1.7, 0.9$  Hz, 1H), 8.35 (d,  $J = 15.9$  Hz, 1H), 8.03 (d,  $J = 8.9$  Hz, 1H), 7.93 (d,  $J = 8.9$  Hz, 1H), 7.55 (dd,  $J = 8.6, 4.2$  Hz, 1H), 6.58 (d,  $J = 16.0$  Hz, 1H), 4.34 – 4.31 (m, 2H), 1.38 (t,  $J = 7.1$  Hz, 3H).  $^{13}\text{C}$  NMR (151 MHz,  $\text{CDCl}_3$ )  $\delta$  166.39, 151.61, 149.32, 139.97, 133.69, 132.48, 130.44, 128.90, 127.01, 126.89, 122.50, 122.29, 60.88, 14.33. HRMS (ESI-TOF)  $m/z$  Calcd for  $\text{C}_{14}\text{H}_{13}\text{ClNO}_2^+$   $[\text{M}+\text{H}]^+$  262.0635, found 262.0638. IR (film)  $\nu_{\text{max}}$  2982, 1712, 1633, 1556, 1369, 1280, 1252, 1179, 1037, 984, 833, 808  $\text{cm}^{-1}$ .

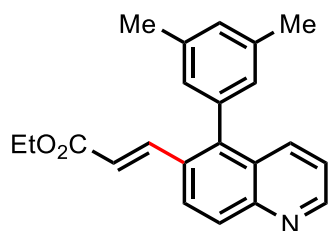

**Ethyl (*E*)-3-(5-(3,5-dimethylphenyl)quinolin-6-yl)acrylate (**2n**)** The general procedure 2.4 was followed and purification by preparative TLC (hexane/EA = 3/1) furnished compound **2n** as a white solid (20.2 mg, 61%, C6:others > 99:1). TLC:  $R_f = 0.3$  (hexane/EA = 5/1). mp: 125-127 °C.  $^1\text{H}$  NMR (600 MHz,  $\text{CDCl}_3$ )  $\delta$  8.82 (dd,  $J = 4.1, 1.7$  Hz, 1H), 8.03 (d,  $J = 9.0$  Hz, 1H), 7.95 (d,  $J = 9.0$  Hz, 1H), 7.81 (ddd,  $J = 8.5, 1.7, 0.8$  Hz, 1H), 7.58 (d,  $J = 15.9$  Hz, 1H), 7.24 (dd,  $J = 8.5, 4.1$  Hz, 1H), 7.04 (tt,  $J = 1.6, 0.7$  Hz, 1H), 6.80 (dp,  $J = 1.2, 0.6$  Hz, 2H), 6.42 (d,  $J = 16.0$  Hz, 1H), 4.13 (q,  $J = 7.1$  Hz, 2H), 2.32 (s, 6H), 1.21 (t,  $J = 7.1$  Hz, 3H).  $^{13}\text{C}$  NMR (151 MHz,  $\text{CDCl}_3$ )  $\delta$  166.83, 150.81, 148.81, 142.79, 142.02, 137.99, 136.04, 135.80, 130.34, 129.86, 129.23, 128.44, 128.18, 126.50, 121.46, 119.65, 60.44, 21.37, 14.26. HRMS (ESI-TOF)  $m/z$  Calcd for  $\text{C}_{22}\text{H}_{22}\text{NO}_2^+$   $[\text{M}+\text{H}]^+$  332.1651, found 332.1656. IR (film)  $\nu_{\text{max}}$  2978, 1708, 1618, 1488, 1461, 1306, 1257, 1169, 1034, 985, 853  $\text{cm}^{-1}$ .

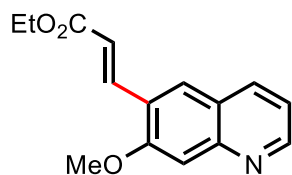

**Ethyl (*E*)-3-(7-methoxyquinolin-6-yl)acrylate (**2o**)** The general procedure 2.4 was followed and purification by preparative TLC (hexane/EA = 1/1) furnished compound **2o** as a white solid (11.3 mg, 44%, C6:others = 80:20). TLC:  $R_f = 0.3$  (hexane/EA = 2/1). mp: 95-97 °C.  $^1\text{H}$  NMR (600 MHz,  $\text{CDCl}_3$ )  $\delta$  8.84 (d,  $J = 2.9$  Hz, 1H), 8.10 – 8.04 (m, 2H), 7.94 (s, 1H), 7.45 (s, 1H), 7.29 (dd,  $J = 8.2, 4.3$  Hz, 1H), 6.71 (d,  $J = 16.1$  Hz, 1H), 4.30 (q,  $J = 7.1$  Hz, 2H), 4.03 (s, 3H), 1.36 (t,  $J = 7.1$  Hz, 3H).  $^{13}\text{C}$  NMR (151 MHz,  $\text{CDCl}_3$ )  $\delta$  167.11, 158.98, 151.50, 150.28, 139.49, 136.14, 128.76, 126.12, 123.14, 121.12, 119.66, 107.58, 60.59, 55.83, 14.37. HRMS (ESI-TOF)  $m/z$  Calcd for  $\text{C}_{15}\text{H}_{16}\text{NO}_3^+$   $[\text{M}+\text{H}]^+$  258.1130, found 258.1135. IR (film)  $\nu_{\text{max}}$  2978, 1707, 1618, 1488, 1461, 1306, 1277, 1257, 1168, 1033, 985, 853  $\text{cm}^{-1}$ .

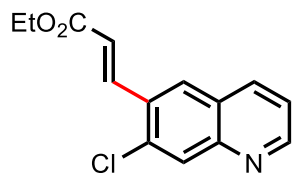

**Ethyl (*E*)-3-(7-chloroquinolin-6-yl)acrylate (2p)** The general procedure 2.4 was followed and purification by preparative TLC (hexane/EA = 5/1) furnished compound **2p** as a white solid (12.3 mg, 47%, C6:others = 95:5). TLC:  $R_f$  = 0.3 (hexane/EA = 10/1). mp: 86-88 °C.  $^1\text{H}$  NMR (600 MHz,  $\text{CDCl}_3$ )  $\delta$  8.93 (dd,  $J$  = 4.2, 1.7 Hz, 1H), 8.22 – 8.14 (m, 3H), 8.08 (s, 1H), 7.43 (dd,  $J$  = 8.3, 4.2 Hz, 1H), 6.57 (d,  $J$  = 15.9 Hz, 1H), 4.32 (q,  $J$  = 7.1 Hz, 2H), 1.37 (t,  $J$  = 7.2 Hz, 3H).  $^{13}\text{C}$  NMR (151 MHz,  $\text{CDCl}_3$ )  $\delta$  166.19, 152.21, 148.73, 140.10, 136.19, 135.30, 131.96, 129.96, 127.13, 126.81, 122.25, 121.94, 60.86, 14.32. HRMS (ESI-TOF)  $m/z$  Calcd for  $\text{C}_{14}\text{H}_{13}\text{ClNO}_2^+$   $[\text{M}+\text{H}]^+$  262.0635, found 262.0635. IR (film)  $\nu_{\text{max}}$  2981, 1710, 1636, 1612, 1473, 1305, 1266, 1176, 1035, 978, 868, 766  $\text{cm}^{-1}$ .

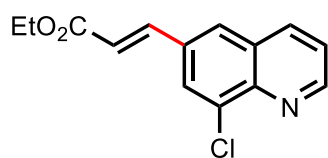

**Ethyl (*E*)-3-(8-chloroquinolin-6-yl)acrylate (2q)** The general procedure 2.4 was followed and purification by preparative TLC (hexane/EA = 5/1) furnished compound **2q** as a white solid (10.7 mg, 41%, C6:others = 91:9). TLC:  $R_f$  = 0.3 (hexane/EA = 10/1). mp: 64-66 °C.  $^1\text{H}$  NMR (600 MHz,  $\text{CDCl}_3$ )  $\delta$  9.06 (dd,  $J$  = 4.2, 1.7 Hz, 1H), 8.21 (dd,  $J$  = 8.3, 1.7 Hz, 1H), 8.05 (d,  $J$  = 1.9 Hz, 1H), 7.84 (d,  $J$  = 1.9 Hz, 1H), 7.78 (d,  $J$  = 16.0 Hz, 1H), 7.52 (dd,  $J$  = 8.2, 4.2 Hz, 1H), 6.57 (d,  $J$  = 16.0 Hz, 1H), 4.30 (q,  $J$  = 7.1 Hz, 2H), 1.37 (t,  $J$  = 7.1 Hz, 3H).  $^{13}\text{C}$  NMR (151 MHz,  $\text{CDCl}_3$ )  $\delta$  166.43, 151.80, 145.10, 142.27, 136.95, 134.53, 133.01, 129.42, 128.08, 127.24, 122.68, 120.61, 60.82, 14.30. HRMS (ESI-TOF)  $m/z$  Calcd for  $\text{C}_{14}\text{H}_{13}\text{ClNO}_2^+$   $[\text{M}+\text{H}]^+$  262.0635, found 262.0639. IR (film)  $\nu_{\text{max}}$  2982, 1708, 1639, 1482, 1370, 1277, 1177, 1036, 980, 858, 786, 750  $\text{cm}^{-1}$ .

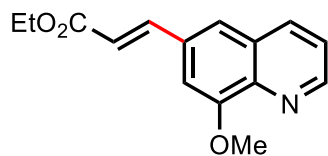

**Ethyl (*E*)-3-(8-methoxyquinolin-6-yl)acrylate (2r)** The general procedure 2.4 was followed and purification by preparative TLC (hexane/EA = 1/1) furnished compound **2r** as a white solid (21 mg, 82%, C6:others = 90:10). TLC:  $R_f = 0.3$  (hexane/EA = 2/1). mp: 79-81 °C.  $^1\text{H}$  NMR (600 MHz,  $\text{CDCl}_3$ )  $\delta$  8.94 (dd,  $J = 4.2, 1.7$  Hz, 1H), 8.14 (dd,  $J = 8.3, 1.7$  Hz, 1H), 7.81 (d,  $J = 15.9$  Hz, 1H), 7.51 (d,  $J = 1.7$  Hz, 1H), 7.46 (dd,  $J = 8.2, 4.2$  Hz, 1H), 7.20 (d,  $J = 1.7$  Hz, 1H), 6.55 (d,  $J = 16.0$  Hz, 1H), 4.31 (q,  $J = 7.1$  Hz, 2H), 4.13 (s, 3H), 1.37 (t,  $J = 7.1$  Hz, 3H).  $^{13}\text{C}$  NMR (151 MHz,  $\text{CDCl}_3$ )  $\delta$  166.76, 155.79, 150.24, 144.13, 141.32, 136.40, 132.95, 129.19, 122.46, 121.92, 119.33, 104.61, 60.70, 56.09, 14.35. HRMS (ESI-TOF)  $m/z$  Calcd for  $\text{C}_{15}\text{H}_{16}\text{NO}_3^+$   $[\text{M}+\text{H}]^+$  258.1130, found 258.1130. IR (film)  $\nu_{\text{max}}$  2980, 1707, 1637, 1500, 1381, 1282, 1261, 1177, 1038, 980, 852  $\text{cm}^{-1}$ .

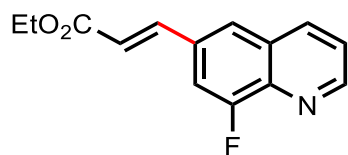

**Ethyl (*E*)-3-(8-fluoroquinolin-6-yl)acrylate (2s)** The general procedure 2.4 was followed and purification by preparative TLC (hexane/EA = 3/1) furnished compound **2s** as a white solid (13.5 mg, 55%, C6:others = 91:9). TLC:  $R_f = 0.3$  (hexane/EA = 5/1). mp: 76-78 °C.  $^1\text{H}$  NMR (600 MHz,  $\text{CDCl}_3$ )  $\delta$  8.99 (dd,  $J = 4.2, 1.6$  Hz, 1H), 8.20 (dt,  $J = 8.4, 1.6$  Hz, 1H), 7.80 (d,  $J = 15.9$  Hz, 1H), 7.71 (s, 1H), 7.61 (dd,  $J = 11.3, 1.8$  Hz, 1H), 7.52 (dd,  $J = 8.3, 4.2$  Hz, 1H), 6.53 (d,  $J = 16.0$  Hz, 1H), 4.30 (q,  $J = 7.1$  Hz, 2H), 1.37 (t,  $J = 7.1$  Hz, 3H).  $^{13}\text{C}$  NMR (151 MHz,  $\text{CDCl}_3$ )  $\delta$  166.48, 158.31 (d,  $J = 258.4$  Hz), 151.39 (d,  $J = 2.1$  Hz), 142.74 (d,  $J = 2.8$  Hz), 139.39 (d,  $J = 12.6$  Hz), 136.22 (d,  $J = 3.4$  Hz), 133.11 (d,  $J = 7.8$  Hz), 129.78 (d,  $J = 3.0$  Hz), 125.01 (d,  $J = 4.0$  Hz), 122.86, 120.50, 110.93 (d,  $J = 19.9$  Hz), 60.83, 14.32.  $^{19}\text{F}$  NMR (376 MHz,  $\text{CDCl}_3$ )  $\delta$  -126.92. HRMS (ESI-TOF)  $m/z$  Calcd for  $\text{C}_{14}\text{H}_{13}\text{FNO}_2^+$   $[\text{M}+\text{H}]^+$  246.0930, found 246.0937. IR (film)  $\nu_{\text{max}}$  2981, 1707, 1639, 1501, 1375, 1280, 1256, 1177, 1088, 1035, 980, 856, 788  $\text{cm}^{-1}$ .

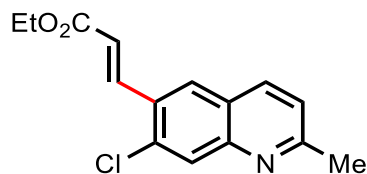

**Ethyl (*E*)-3-(7-chloro-2-methylquinolin-6-yl)acrylate (2t)** The general procedure 2.4 was followed and purification by preparative TLC (hexane/EA = 5/1) furnished compound **2t** as a white solid (21.2 mg, 77%, C6:others = 93:7). TLC:  $R_f = 0.3$  (hexane/EA = 10/1). mp: 64-66 °C.  $^1\text{H}$  NMR (600 MHz,  $\text{CDCl}_3$ )  $\delta$  8.19 (d,  $J = 16.0$  Hz, 1H), 8.08 (s, 1H), 8.04 – 8.02 (m, 2H), 7.31 (d,  $J = 8.4$  Hz, 1H), 6.55 (d,  $J = 15.9$  Hz, 1H), 4.31 (q,  $J = 7.1$  Hz, 2H), 2.74 (s, 3H), 1.37 (t,  $J = 7.1$  Hz, 3H).  $^{13}\text{C}$  NMR (151 MHz,  $\text{CDCl}_3$ )  $\delta$  166.32, 161.35, 148.45, 140.27, 136.18, 135.26, 130.93, 129.22, 126.84, 125.04, 122.94, 121.64, 60.79, 25.53, 14.33. HRMS (ESI-TOF)  $m/z$  Calcd for  $\text{C}_{15}\text{H}_{15}\text{ClNO}_2^+$   $[\text{M}+\text{H}]^+$  276.0791, found 276.0793. IR (film)  $\nu_{\text{max}}$  2983, 1711, 1612, 1476, 1370, 1308, 1267, 1201, 1175, 1033, 978, 867  $\text{cm}^{-1}$ .

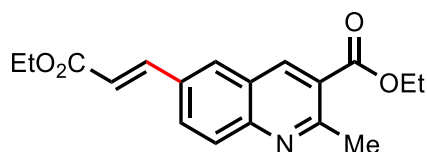

**Ethyl (*E*)-3-(7-chloroquinolin-6-yl)acrylate (2u)** The general procedure 2.4 was followed and purification by preparative TLC (hexane/EA = 5/1) furnished compound **2u** as a white solid (18.2 mg, 58%, C6:others = 94:6). TLC:  $R_f = 0.3$  (hexane/EA = 10/1). mp: 86-88 °C.  $^1\text{H}$  NMR (600 MHz,  $\text{CDCl}_3$ )  $\delta$  8.73 (s, 1H), 8.03 (d,  $J = 8.7$  Hz, 1H), 7.97 – 7.94 (m, 2H), 7.83 (d,  $J = 16.0$  Hz, 1H), 6.57 (d,  $J = 16.0$  Hz, 1H), 4.46 (q,  $J = 7.1$  Hz, 2H), 4.30 (q,  $J = 7.2$  Hz, 2H), 3.00 (s, 3H), 1.47 (t,  $J = 7.2$  Hz, 3H), 1.37 (t,  $J = 7.1$  Hz, 3H).  $^{13}\text{C}$  NMR (151 MHz,  $\text{CDCl}_3$ )  $\delta$  166.72, 166.26, 159.69, 149.32, 143.25, 140.03, 132.71, 129.65, 129.39, 129.36, 125.80, 124.76, 119.74, 61.57, 60.73, 25.76, 14.34, 14.32. HRMS (ESI-TOF)  $m/z$  Calcd for  $\text{C}_{18}\text{H}_{20}\text{NO}_4^+$   $[\text{M}+\text{H}]^+$  314.1392, found 314.1393. IR (film)  $\nu_{\text{max}}$  2980, 1713, 1636, 1591, 1446, 1367, 1286, 1240, 1212, 1172, 1066, 836  $\text{cm}^{-1}$ .

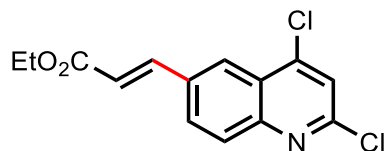

**Ethyl (*E*)-3-(2,4-dichloroquinolin-6-yl)acrylate (2v)** The general procedure 2.4 was followed except using **T8** (0.2 equiv) and purification by preparative TLC (hexane/EA = 20/1) furnished compound **2v** as a white solid (14.4 mg, 49%, C6:others = 95:5). TLC:  $R_f = 0.3$  (hexane/EA =

30/1). mp: 94-96 °C. <sup>1</sup>H NMR (600 MHz, CDCl<sub>3</sub>) δ 8.28 (d, *J* = 1.9 Hz, 1H), 8.03 (d, *J* = 8.8 Hz, 1H), 7.96 (dd, *J* = 8.8, 1.9 Hz, 1H), 7.86 (d, *J* = 16.0 Hz, 1H), 7.55 (s, 1H), 6.61 (d, *J* = 16.0 Hz, 1H), 4.31 (q, *J* = 7.1 Hz, 2H), 1.37 (t, *J* = 7.1 Hz, 3H). <sup>13</sup>C NMR (151 MHz, CDCl<sub>3</sub>) δ 166.44, 150.87, 148.81, 144.62, 142.81, 134.10, 129.77, 129.51, 125.37, 125.07, 122.76, 120.89, 60.86, 14.33. HRMS (ESI-TOF) *m/z* Calcd for C<sub>14</sub>H<sub>12</sub>Cl<sub>2</sub>NO<sub>2</sub><sup>+</sup> [M+H]<sup>+</sup> 296.0245, found 296.0250. IR (film) *v*<sub>max</sub> 2982, 1712, 1639, 1565, 1436, 1396, 1311, 1173, 1097, 1036, 980, 844 cm<sup>-1</sup>.

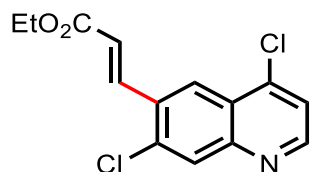

**Ethyl (*E*)-3-(4,7-dichloroquinolin-6-yl)acrylate (2w)** The general procedure 2.4 was followed and purification by preparative TLC (hexane/EA = 10/1) furnished compound **2w** as a white solid (24.5 mg, 83%, C6:others > 99:1). TLC: *R<sub>f</sub>* = 0.3 (hexane/EA = 15/1). mp: 105-107 °C. <sup>1</sup>H NMR (600 MHz, CDCl<sub>3</sub>) δ 8.78 (d, *J* = 4.7 Hz, 1H), 8.46 (s, 1H), 8.19 (t, *J* = 8.0 Hz, 2H), 7.50 (d, *J* = 4.7 Hz, 1H), 6.64 (d, *J* = 15.9 Hz, 1H), 4.33 (q, *J* = 7.1 Hz, 2H), 1.38 (t, *J* = 7.1 Hz, 3H). <sup>13</sup>C NMR (151 MHz, CDCl<sub>3</sub>) δ 166.05, 151.72, 149.43, 142.83, 139.69, 136.45, 132.97, 130.27, 125.24, 123.57, 123.09, 121.98, 60.96, 14.32. HRMS (ESI-TOF) *m/z* Calcd for C<sub>14</sub>H<sub>12</sub>Cl<sub>2</sub>NO<sub>2</sub><sup>+</sup> [M+H]<sup>+</sup> 296.0245, found 296.0248. IR (film) *v*<sub>max</sub> 2981, 1713, 1638, 1607, 1545, 1470, 1304, 1262, 1198, 1175, 1027, 977, 882, 864, 797, 681 cm<sup>-1</sup>.

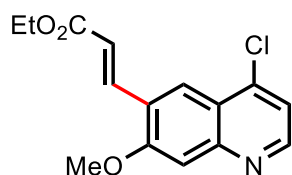

**Ethyl (*E*)-3-(4-chloro-7-methoxyquinolin-6-yl)acrylate (2x)** The general procedure 2.4 was followed and purification by preparative TLC (hexane/EA = 1/1) furnished compound **2x** as a pale yellow solid (16.3 mg, 56%, C6:others = 80:20). TLC: *R<sub>f</sub>* = 0.3 (hexane/EA = 2/1). mp: 115-117 °C. <sup>1</sup>H NMR (600 MHz, CDCl<sub>3</sub>) δ 8.69 (d, *J* = 4.7 Hz, 1H), 8.33 (s, 1H), 8.08 (d, *J* = 16.1 Hz, 1H), 7.45 (s, 1H), 7.36 (d, *J* = 4.7 Hz, 1H), 6.76 (d, *J* = 16.1 Hz, 1H), 4.31 (q, *J* = 7.1 Hz, 2H), 4.04 (s, 3H), 1.37 (t, *J* = 7.2 Hz, 3H). <sup>13</sup>C NMR (151 MHz, CDCl<sub>3</sub>) δ 166.93, 159.55, 151.18, 151.04, 142.69, 139.07, 127.03, 125.00, 121.88, 121.34,



119.82, 107.91, 60.68, 56.00, 14.36. HRMS (ESI-TOF)  $m/z$  Calcd for  $C_{15}H_{15}ClNO_3^+$   $[M+H]^+$  292.0740, found 292.0742. IR (film)  $\nu_{max}$  2980, 1709, 1616, 1554, 1487, 1446, 1337, 1303, 1266, 1166, 1031, 983, 856, 749, 690  $cm^{-1}$ .

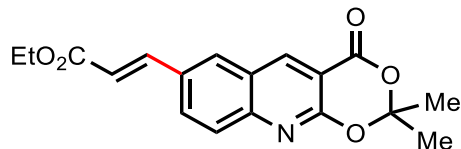

**Ethyl (E)-3-(2,2-dimethyl-4-oxo-4H-[1,3]dioxino[4,5-b]quinolin-7-yl)acrylate (2y)** The general procedure 2.4 was followed and purification by preparative TLC (hexane/EA = 3/1) furnished compound **2y** as a white solid (13.0 mg, 40%,  $C_{shown}:others = 86:14$ ). TLC:  $R_f = 0.3$  (hexane/EA = 5/1). mp: 192-194 °C.  $^1H$  NMR (600 MHz,  $CDCl_3$ )  $\delta$  8.93 (s, 1H), 8.02 – 7.98 (m, 2H), 7.94 (d,  $J = 8.6$  Hz, 1H), 7.82 (d,  $J = 16.0$  Hz, 1H), 6.56 (d,  $J = 16.0$  Hz, 1H), 4.31 (q,  $J = 7.1$  Hz, 2H), 1.86 (s, 6H), 1.37 (t,  $J = 7.1$  Hz, 3H).  $^{13}C$  NMR (151 MHz,  $CDCl_3$ )  $\delta$  166.53, 160.27, 158.75, 150.85, 142.66, 142.62, 132.59, 131.41, 130.17, 128.81, 125.58, 120.15, 109.51, 107.07, 60.82, 26.65, 14.33. HRMS (ESI-TOF)  $m/z$  Calcd for  $C_{18}H_{18}NO_5^+$   $[M+H]^+$  328.1185, found 328.1191. IR (film)  $\nu_{max}$  2986, 1747, 1702, 1623, 1454, 1370, 1292, 1180, 1036, 981, 918, 835  $cm^{-1}$ .

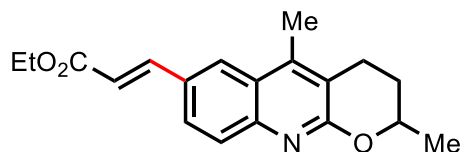

**Ethyl (E)-3-(2,5-dimethyl-3,4-dihydro-2H-pyrano[2,3-b]quinolin-7-yl)acrylate (2z)** The general procedure 2.4 was followed and purification by preparative TLC (hexane/EA = 3/1) furnished compound **2z** as a white solid (10.3 mg, 33%,  $C_{shown}:others = 89:11$ ). TLC:  $R_f = 0.3$  (hexane/EA = 5/1). mp: 184-186 °C.  $^1H$  NMR (600 MHz,  $CDCl_3$ )  $\delta$  7.97 (d,  $J = 1.8$  Hz, 1H), 7.84 (d,  $J = 15.9$  Hz, 1H), 7.80 (d,  $J = 8.7$  Hz, 1H), 7.77 (dd,  $J = 8.8, 1.8$  Hz, 1H), 6.50 (d,  $J = 15.9$  Hz, 1H), 4.41 (ddt,  $J = 12.6, 6.3, 4.2$  Hz, 1H), 4.29 (q,  $J = 7.2$  Hz, 2H), 3.03 – 2.98 (m, 1H), 2.91 – 2.85 (m, 1H), 2.57 (d,  $J = 0.9$  Hz, 3H), 2.18 – 2.14 (m, 1H), 1.85 – 1.79 (m, 1H), 1.53 (d,  $J = 6.3$  Hz, 3H), 1.36 (t,  $J = 7.1$  Hz, 3H).  $^{13}C$  NMR (151 MHz,  $CDCl_3$ )  $\delta$  167.15, 160.89, 147.03, 144.72, 144.69, 129.94, 128.77, 126.67, 125.42, 125.04, 117.66, 117.05, 73.48, 60.51, 28.81,

23.53, 21.36, 14.38, 13.93. HRMS (ESI-TOF)  $m/z$  Calcd for  $C_{19}H_{22}NO_3^+$   $[M+H]^+$  312.1600, found 312.1599. IR (film)  $\nu_{max}$  2976, 2932, 1707, 1633, 1589, 1442, 1396, 1370, 1311, 1272, 1203, 1175, 1134, 1079, 1040, 960, 832, 750  $cm^{-1}$ .

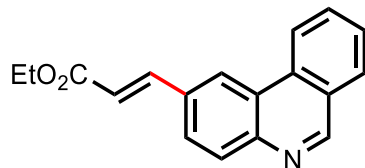

**Ethyl (*E*)-3-(phenanthridin-2-yl)acrylate (2aa)** The general procedure 2.4 was followed except using **T15** (0.2 equiv) and **TC10** (0.8 equiv) and purification by preparative TLC (hexane/EA = 3/1) furnished compound **2aa** as a pale yellow solid (13.6 mg, 49%,  $C_{shown}:others = 91:9$ ). TLC:  $R_f = 0.3$  (hexane/EA = 5/1). mp: 95-97 °C.  $^1H$  NMR (600 MHz,  $CDCl_3$ )  $\delta$  9.30 (s, 1H), 8.67 (s, 1H), 8.63 (d,  $J = 8.3$  Hz, 1H), 8.18 (d,  $J = 8.5$  Hz, 1H), 8.07 (d,  $J = 7.9$  Hz, 1H), 7.97 – 7.89 (m, 3H), 7.75 (t,  $J = 7.5$  Hz, 1H), 6.64 (dd,  $J = 15.9, 1.1$  Hz, 1H), 4.32 (q,  $J = 7.1$  Hz, 2H), 1.39 (t,  $J = 7.2$  Hz, 3H).  $^{13}C$  NMR (151 MHz,  $CDCl_3$ )  $\delta$  166.87, 154.53, 145.50, 144.14, 133.10, 132.36, 131.43, 130.84, 128.99, 128.00, 126.86, 126.63, 124.30, 123.47, 121.81, 119.40, 60.68, 14.37. HRMS (ESI-TOF)  $m/z$  Calcd for  $C_{18}H_{16}NO_2^+$   $[M+H]^+$  278.1181, found 278.1185. IR (film)  $\nu_{max}$  2980, 1708, 1635, 1366, 1296, 1242, 1174, 1037, 981, 832  $cm^{-1}$ .

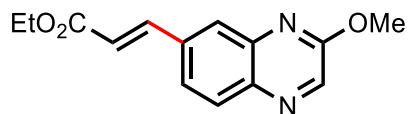

**Ethyl (*E*)-3-(3-methoxyquinoxalin-6-yl)acrylate (2ab)** The general procedure 2.4 was followed except using **T15** (0.2 equiv) and **TC10** (0.8 equiv) and purification by preparative TLC (hexane/EA = 10/1) furnished compound **2ab** as a white solid (19.6 mg, 76%,  $C7:others = 91:9$ ). TLC:  $R_f = 0.3$  (hexane/EA = 15/1). mp: 94-96 °C.  $^1H$  NMR (600 MHz,  $CDCl_3$ )  $\delta$  8.46 (s, 1H), 8.00 (d,  $J = 8.5$  Hz, 1H), 7.96 (d,  $J = 1.9$  Hz, 1H), 7.83 (d,  $J = 15.9$  Hz, 1H), 7.73 (dd,  $J = 8.6, 1.9$  Hz, 1H), 6.61 (d,  $J = 16.0$  Hz, 1H), 4.30 (q,  $J = 7.1$  Hz, 2H), 4.11 (s, 3H), 1.37 (t,  $J = 7.1$  Hz, 3H).  $^{13}C$  NMR (151 MHz,  $CDCl_3$ )  $\delta$  166.67, 158.19, 143.48, 140.58, 140.36, 139.72, 136.19, 129.55, 127.72, 124.98, 120.43, 60.74, 53.87, 14.33. HRMS (ESI-TOF)  $m/z$  Calcd for  $C_{14}H_{15}N_2O_3^+$   $[M+H]^+$  259.1083, found 259.1089. IR (film)  $\nu_{max}$  2981, 1710, 1637, 1577, 1462, 1386, 1347, 1308, 1289, 1222, 1174, 1158, 1022, 983, 831  $cm^{-1}$ .

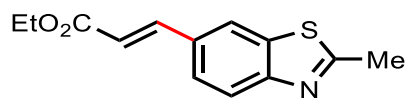

**Ethyl (*E*)-3-(2-methylbenzo[d]thiazol-6-yl)acrylate (2ac)** The general procedure 2.4 was followed and purification by preparative TLC (hexane/EA = 10/1) furnished compound **2ac** as a white solid (11.6 mg, 47%, C6:others = 86:14). TLC:  $R_f = 0.3$  (hexane/EA = 20/1). mp: 59-61 °C.  $^1\text{H}$  NMR (600 MHz,  $\text{CDCl}_3$ )  $\delta$  7.96 (d,  $J = 1.7$  Hz, 1H), 7.93 (d,  $J = 8.5$  Hz, 1H), 7.77 (d,  $J = 15.9$  Hz, 1H), 7.63 (dd,  $J = 8.5, 1.7$  Hz, 1H), 6.48 (d,  $J = 15.9$  Hz, 1H), 4.28 (t,  $J = 7.1$  Hz, 2H), 2.85 (s, 3H), 1.35 (t,  $J = 7.1$  Hz, 3H).  $^{13}\text{C}$  NMR (151 MHz,  $\text{CDCl}_3$ )  $\delta$  168.96, 166.89, 154.62, 143.98, 136.43, 131.32, 125.54, 122.69, 121.62, 118.50, 60.59, 20.32, 14.34. HRMS (ESI-TOF)  $m/z$  Calcd for  $\text{C}_{13}\text{H}_{14}\text{NO}_2\text{S}^+ [\text{M}+\text{H}]^+$  248.0745, found 248.0747. IR (film)  $\nu_{\text{max}}$  2980, 1707, 1634, 1520, 1455, 1411, 1367, 1325, 1253, 1170, 1037, 981, 858, 823  $\text{cm}^{-1}$ .

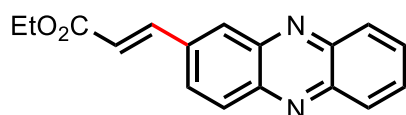

**Ethyl (*E*)-3-(phenazin-2-yl)acrylate (2ad)** The general procedure 2.4 was followed and purification by preparative TLC (hexane/EA = 3/1) furnished compound **2ad** as a white solid (15.6 mg, 56%,  $\text{C}_{\text{shown}}$ :others = 94:6). TLC:  $R_f = 0.3$  (hexane/EA = 5/1). mp: 107-109 °C.  $^1\text{H}$  NMR (600 MHz,  $\text{CDCl}_3$ )  $\delta$  8.25 (d,  $J = 1.5$  Hz, 1H), 8.20 – 8.15 (m, 3H), 7.96 (dd,  $J = 9.1, 1.9$  Hz, 1H), 7.87 (dd,  $J = 16.0, 0.6$  Hz, 1H), 7.80 (dt,  $J = 6.6, 3.3$  Hz, 2H), 6.62 (d,  $J = 16.0$  Hz, 1H), 4.26 (t,  $J = 7.1$  Hz, 2H), 1.32 (t,  $J = 7.1$  Hz, 3H).  $^{13}\text{C}$  NMR (151 MHz,  $\text{CDCl}_3$ )  $\delta$  166.83, 150.81, 148.81, 142.79, 142.02, 137.99, 136.04, 135.80, 130.34, 129.86, 129.23, 128.44, 128.18, 126.50, 121.46, 119.65, 60.44, 21.37, 14.26. HRMS (ESI-TOF)  $m/z$  Calcd for  $\text{C}_{17}\text{H}_{15}\text{N}_2\text{O}_2^+ [\text{M}+\text{H}]^+$  279.1134, found 279.1135. IR (film)  $\nu_{\text{max}}$  2980, 1712, 1636, 1511, 1442, 1366, 1308, 1284, 1170, 1038, 980, 830, 757  $\text{cm}^{-1}$ .

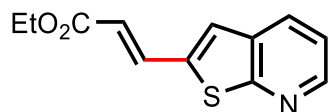

**Ethyl (*E*)-3-(thieno[2,3-b]pyridin-2-yl)acrylate (2ae)** The general procedure 2.4 was followed and purification by preparative TLC (hexane/EA = 3/1) furnished compound **2ae** as a white solid

(19.6 mg, 84%, C6:others = 94:6). TLC:  $R_f = 0.3$  (hexane/EA = 5/1). mp: 59-61 °C.  $^1\text{H}$  NMR (600 MHz,  $\text{CDCl}_3$ )  $\delta$  8.59 (dd,  $J = 4.6, 1.6$  Hz, 1H), 8.04 (dd,  $J = 8.0, 1.6$  Hz, 1H), 7.86 (dd,  $J = 15.7, 0.7$  Hz, 1H), 7.41 (s, 1H), 7.32 (dd,  $J = 8.0, 4.6$  Hz, 1H), 6.39 (d,  $J = 15.6$  Hz, 1H), 4.31 (q,  $J = 7.1$  Hz, 2H), 1.37 (t,  $J = 7.1$  Hz, 3H).  $^{13}\text{C}$  NMR (151 MHz,  $\text{CDCl}_3$ )  $\delta$  166.27, 161.89, 148.12, 139.81, 137.40, 133.19, 131.56, 125.68, 120.99, 120.13, 60.84, 14.30. HRMS (ESI-TOF)  $m/z$  Calcd for  $\text{C}_{12}\text{H}_{12}\text{NO}_2\text{S}^+$   $[\text{M}+\text{H}]^+$  234.0589, found 234.0593. IR (film)  $\nu_{\text{max}}$  2981, 1709, 1629, 1573, 1508, 1382, 1301, 1265, 1172, 1150, 1038, 967, 838  $\text{cm}^{-1}$ .

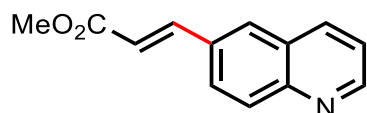

**Methyl (*E*)-3-(quinolin-6-yl)acrylate (2af)** The general procedure 2.4 was followed and purification by preparative TLC (hexane/EA = 3/1) furnished compound **2af** as a white solid (12.4 mg, 58%, C6:others = 92:8). TLC:  $R_f = 0.3$  (hexane/EA = 5/1). mp: 76-78 °C.  $^1\text{H}$  NMR (600 MHz,  $\text{CDCl}_3$ )  $\delta$  8.93 (dd,  $J = 4.2, 1.7$  Hz, 1H), 8.19 – 8.17 (m, 1H), 8.11 (d,  $J = 9.3$  Hz, 1H), 7.92 – 7.90 (m, 2H), 7.86 (d,  $J = 16.0$  Hz, 1H), 7.44 (dd,  $J = 8.3, 4.2$  Hz, 1H), 6.58 (d,  $J = 16.0$  Hz, 1H), 3.85 (s, 3H).  $^{13}\text{C}$  NMR (151 MHz,  $\text{CDCl}_3$ )  $\delta$  167.23, 151.39, 149.08, 143.91, 136.47, 132.63, 130.32, 129.31, 128.25, 127.25, 121.88, 119.14, 51.86. HRMS (ESI-TOF)  $m/z$  Calcd for  $\text{C}_{13}\text{H}_{12}\text{NO}_2^+$   $[\text{M}+\text{H}]^+$  214.0868, found 214.0871. IR (film)  $\nu_{\text{max}}$  2950, 1711, 1638, 1589, 1501, 1434, 1330, 1308, 1281, 1193, 1170, 1038, 981, 835  $\text{cm}^{-1}$ .

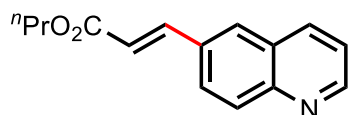

**Propyl (*E*)-3-(quinolin-6-yl)acrylate (2ag)** The general procedure 2.4 was followed and purification by preparative TLC (hexane/EA = 3/1) furnished compound **2ag** as a pale yellow solid (16.6 mg, 69%, C6:others = 92:8). TLC:  $R_f = 0.3$  (hexane/EA = 5/1). mp: 47-49 °C.  $^1\text{H}$  NMR (600 MHz,  $\text{CDCl}_3$ )  $\delta$  8.93 (dd,  $J = 4.2, 1.7$  Hz, 1H), 8.17 (dd,  $J = 8.4, 1.2$  Hz, 1H), 8.10 (d,  $J = 9.3$  Hz, 1H), 7.93 – 7.89 (m, 2H), 7.85 (d,  $J = 16.2$  Hz, 1H), 7.44 (dd,  $J = 8.2, 4.2$  Hz, 1H), 6.59 (d,  $J = 16.0$  Hz, 1H), 4.21 (t,  $J = 6.7$  Hz, 2H), 1.76 (q,  $J = 6.9$  Hz, 2H), 1.02 (t,  $J = 7.4$  Hz, 3H).  $^{13}\text{C}$  NMR (151 MHz,  $\text{CDCl}_3$ )  $\delta$  166.88, 151.34, 149.06, 143.59, 136.45, 132.73, 130.28, 129.22, 128.27, 127.28, 121.86, 119.65, 66.33, 22.11, 10.48. HRMS (ESI-TOF)  $m/z$  Calcd for

$C_{15}H_{16}NO_2^+$   $[M+H]^+$  242.1181, found 242.1185. IR (film)  $\nu_{max}$  2967, 1708, 1636, 1589, 1501, 1461, 1389, 1309, 1280, 1173, 982, 835  $cm^{-1}$ .

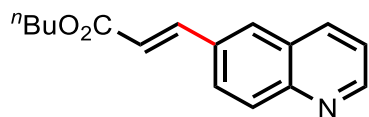

**Butyl (*E*)-3-(quinolin-6-yl)acrylate (2ah)** The general procedure 2.4 was followed and purification by preparative TLC (hexane/EA = 3/1) furnished compound **2ah** as colorless oil (20.4 mg, 80%, C6:others = 93:7). TLC:  $R_f$  = 0.3 (hexane/EA = 5/1).  $^1H$  NMR (600 MHz,  $CDCl_3$ )  $\delta$  8.93 (dd,  $J$  = 4.2, 1.7 Hz, 1H), 8.17 (dd,  $J$  = 8.3, 1.3 Hz, 1H), 8.10 (d,  $J$  = 9.3 Hz, 1H), 7.91 (dq,  $J$  = 4.5, 2.0 Hz, 2H), 7.85 (d,  $J$  = 16.0 Hz, 1H), 7.44 (dd,  $J$  = 8.3, 4.2 Hz, 1H), 6.58 (d,  $J$  = 16.0 Hz, 1H), 4.25 (t,  $J$  = 6.7 Hz, 2H), 1.74 – 1.70 (m, 2H), 1.46 (dt,  $J$  = 14.8, 7.4 Hz, 2H), 0.98 (t,  $J$  = 7.4 Hz, 3H).  $^{13}C$  NMR (151 MHz,  $CDCl_3$ )  $\delta$  166.89, 151.34, 149.06, 143.57, 136.45, 132.74, 130.28, 129.22, 128.27, 127.28, 121.86, 119.67, 64.62, 30.79, 19.22, 13.77. HRMS (ESI-TOF)  $m/z$  Calcd for  $C_{16}H_{18}NO_2^+$   $[M+H]^+$  256.1338, found 256.1343. IR (film)  $\nu_{max}$  2958, 2872, 1709, 1637, 1501, 1461, 1386, 1328, 1305, 1280, 1172, 981, 835  $cm^{-1}$ .

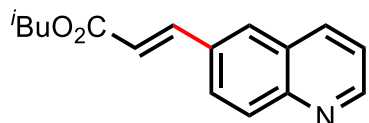

**Isobutyl (*E*)-3-(quinolin-6-yl)acrylate (2ai)** The general procedure 2.4 was followed and purification by preparative TLC (hexane/EA = 3/1) furnished compound **2ai** as a white solid (21.2 mg, 83%, C6:others = 94:6). TLC:  $R_f$  = 0.3 (hexane/EA = 5/1). mp: 67-69  $^{\circ}C$ .  $^1H$  NMR (600 MHz,  $CDCl_3$ )  $\delta$  8.93 (dd,  $J$  = 4.2, 1.7 Hz, 1H), 8.19 – 8.16 (m, 1H), 8.10 (d,  $J$  = 9.5 Hz, 1H), 7.93 – 7.89 (m, 2H), 7.85 (d,  $J$  = 16.0 Hz, 1H), 7.44 (dd,  $J$  = 8.3, 4.2 Hz, 1H), 6.60 (d,  $J$  = 16.0 Hz, 1H), 4.03 (d,  $J$  = 6.7 Hz, 2H), 2.04 (dq,  $J$  = 13.4, 6.7 Hz, 1H), 1.01 (d,  $J$  = 6.8 Hz, 6H).  $^{13}C$  NMR (151 MHz,  $CDCl_3$ )  $\delta$  166.86, 151.34, 149.05, 143.59, 136.44, 132.73, 130.28, 129.23, 128.26, 127.29, 121.86, 119.65, 70.83, 27.86, 19.18. HRMS (ESI-TOF)  $m/z$  Calcd for  $C_{16}H_{18}NO_2^+$   $[M+H]^+$  256.1338, found 256.1342. IR (film)  $\nu_{max}$  2961, 1707, 1636, 1501, 1468, 1380, 1328, 1307, 1280, 1162, 1016, 980, 834  $cm^{-1}$ .

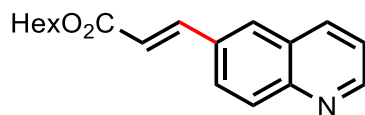

**Hexyl (*E*)-3-(quinolin-6-yl)acrylate (2aj)** The general procedure 2.4 was followed and purification by preparative TLC (hexane/EA = 3/1) furnished compound **2aj** as pale yellow oil (19.8 mg, 70%, C6:others = 93:7). TLC:  $R_f = 0.3$  (hexane/EA = 5/1).  $^1\text{H}$  NMR (600 MHz,  $\text{CDCl}_3$ )  $\delta$  8.93 (dd,  $J = 4.2, 1.7$  Hz, 1H), 8.17 (dd,  $J = 8.8, 1.2$  Hz, 1H), 8.10 (d,  $J = 9.3$  Hz, 1H), 7.91 (dq,  $J = 3.9, 2.0$  Hz, 2H), 7.85 (d,  $J = 16.0$  Hz, 1H), 7.44 (dd,  $J = 8.3, 4.2$  Hz, 1H), 6.59 (d,  $J = 16.0$  Hz, 1H), 4.24 (t,  $J = 6.7$  Hz, 2H), 1.74 – 1.71 (m, 2H), 1.45 – 1.39 (m, 2H), 1.34 (ddd,  $J = 7.2, 4.5, 3.2$  Hz, 4H), 0.93 – 0.90 (m, 3H).  $^{13}\text{C}$  NMR (151 MHz,  $\text{CDCl}_3$ )  $\delta$  166.89, 151.34, 149.06, 143.57, 136.45, 132.74, 130.28, 129.22, 128.27, 127.29, 121.86, 119.68, 64.92, 31.48, 28.71, 25.67, 22.57, 14.03. HRMS (ESI-TOF)  $m/z$  Calcd for  $\text{C}_{18}\text{H}_{22}\text{NO}_2^+$   $[\text{M}+\text{H}]^+$  284.1651, found 284.2643. IR (film)  $\nu_{\text{max}}$  2954, 2928, 2858, 1710, 1637, 1589, 1501, 1463, 1386, 1329, 1305, 1280, 1171, 982, 835  $\text{cm}^{-1}$ .

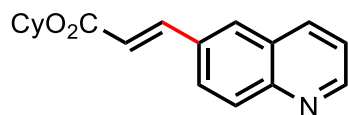

**Cyclohexyl (*E*)-3-(quinolin-6-yl)acrylate (2ak)** The general procedure 2.4 was followed and purification by preparative TLC (hexane/EA = 3/1) furnished compound **2ak** as a white solid (12.9 mg, 46%, C6:others = 93:7). TLC:  $R_f = 0.3$  (hexane/EA = 5/1). mp: 76-78 °C.  $^1\text{H}$  NMR (600 MHz,  $\text{CDCl}_3$ )  $\delta$  8.93 (dd,  $J = 4.2, 1.7$  Hz, 1H), 8.17 (ddd,  $J = 8.3, 1.8, 0.8$  Hz, 1H), 8.10 (d,  $J = 9.3$  Hz, 1H), 7.91 (dq,  $J = 4.6, 2.0$  Hz, 2H), 7.83 (d,  $J = 15.9$  Hz, 1H), 7.44 (dd,  $J = 8.3, 4.2$  Hz, 1H), 6.58 (d,  $J = 16.0$  Hz, 1H), 4.93 (tt,  $J = 9.2, 3.9$  Hz, 1H), 1.97 – 1.92 (m, 2H), 1.79 (dp,  $J = 13.4, 4.3$  Hz, 2H), 1.59 (dq,  $J = 13.2, 4.9, 4.5$  Hz, 1H), 1.55 – 1.48 (m, 2H), 1.46 – 1.40 (m, 2H), 1.32 (ddt,  $J = 13.8, 10.3, 3.6$  Hz, 1H).  $^{13}\text{C}$  NMR (151 MHz,  $\text{CDCl}_3$ )  $\delta$  166.23, 151.29, 149.03, 143.27, 136.44, 132.83, 130.25, 129.14, 128.27, 127.31, 121.84, 120.28, 72.98, 31.75, 25.44, 23.82. HRMS (ESI-TOF)  $m/z$  Calcd for  $\text{C}_{18}\text{H}_{20}\text{NO}_2^+$   $[\text{M}+\text{H}]^+$  282.1494, found 282.1498. IR (film)  $\nu_{\text{max}}$  2935, 2858, 1706, 1636, 1589, 1501, 1451, 1382, 1329, 1301, 1280, 1174, 1038, 1017, 982, 834  $\text{cm}^{-1}$ .

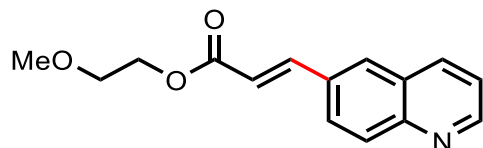

**2-Methoxyethyl (*E*)-3-(quinolin-6-yl)acrylate (2al)** The general procedure 2.4 was followed and purification by preparative TLC (hexane/EA = 1/1) furnished compound **2al** as pale yellow oil (16.7 mg, 65%, C6:others = 91:9). TLC:  $R_f = 0.3$  (hexane/EA = 2/1).  $^1\text{H NMR}$  (600 MHz,  $\text{CDCl}_3$ )  $\delta$  8.93 (dd,  $J = 4.2, 1.7$  Hz, 1H), 8.18 (dd,  $J = 8.5, 1.0$  Hz, 1H), 8.10 (d,  $J = 8.5$  Hz, 1H), 7.92 – 7.85 (m, 3H), 7.44 (dd,  $J = 8.3, 4.2$  Hz, 1H), 6.64 (d,  $J = 16.0$  Hz, 1H), 4.42 – 4.39 (m, 2H), 3.71 – 3.68 (m, 2H), 3.44 (s, 3H).  $^{13}\text{C NMR}$  (151 MHz,  $\text{CDCl}_3$ )  $\delta$  166.75, 151.40, 149.09, 144.15, 136.49, 132.63, 130.32, 129.37, 128.25, 127.26, 121.87, 119.19, 70.57, 63.74, 59.08. HRMS (ESI-TOF)  $m/z$  Calcd for  $\text{C}_{15}\text{H}_{16}\text{NO}_3^+$   $[\text{M}+\text{H}]^+$  258.1130, found 258.1135. IR (film)  $\nu_{\text{max}}$  2891, 1709, 1636, 1589, 1501, 1455, 1381, 1327, 1304, 1279, 1171, 1127, 1040, 982, 864, 836  $\text{cm}^{-1}$ .

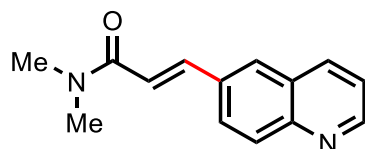

**(*E*)-*N,N*-Dimethyl-3-(quinolin-6-yl)acrylamide (2am)** The general procedure 2.4 was followed and purification by preparative TLC (EA) furnished compound **2am** as a white solid (12.2 mg, 54%, C6:others = 97:3). TLC:  $R_f = 0.2$  (EA). mp: 151-153 °C.  $^1\text{H NMR}$  (600 MHz,  $\text{CDCl}_3$ )  $\delta$  8.93 – 8.90 (m, 1H), 8.17 (d,  $J = 8.2$  Hz, 1H), 8.09 (d,  $J = 8.8$  Hz, 1H), 7.94 (dd,  $J = 8.8, 2.0$  Hz, 1H), 7.89 (s, 1H), 7.84 (d,  $J = 15.4$  Hz, 1H), 7.43 (dd,  $J = 8.3, 4.2$  Hz, 1H), 7.04 (d,  $J = 15.4$  Hz, 1H), 3.23 (s, 3H), 3.10 (s, 3H).  $^{13}\text{C NMR}$  (151 MHz,  $\text{CDCl}_3$ )  $\delta$  166.42, 151.03, 148.81, 141.47, 136.38, 133.58, 130.07, 128.79, 128.37, 127.23, 121.77, 118.72, 37.49, 36.02. HRMS (ESI-TOF)  $m/z$  Calcd for  $\text{C}_{14}\text{H}_{15}\text{N}_2\text{O}^+$   $[\text{M}+\text{H}]^+$  227.1184, found 227.1184. IR (film)  $\nu_{\text{max}}$  2935, 1649, 1604, 1501, 1397, 1139, 988, 904, 835  $\text{cm}^{-1}$ .

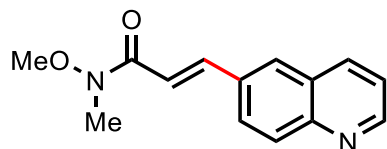

**(E)-N-Methoxy-N-methyl-3-(quinolin-6-yl)acrylamide (2an)** The general procedure 2.4 was followed and purification by preparative TLC (EA) furnished compound **2an** as a white solid (14.8 mg, 61%, C6:others = 97:3). TLC:  $R_f = 0.2$  (EA). mp: 101-103 °C.  $^1\text{H}$  NMR (600 MHz,  $\text{CDCl}_3$ )  $\delta$  8.92 (dd,  $J = 4.2, 1.7$  Hz, 1H), 8.19 (dd,  $J = 8.3, 1.2$  Hz, 1H), 8.11 (d,  $J = 9.4$  Hz, 1H), 7.98 (dd,  $J = 8.8, 2.0$  Hz, 1H), 7.93 (d,  $J = 1.9$  Hz, 1H), 7.90 (d,  $J = 15.8$  Hz, 1H), 7.44 (dd,  $J = 8.3, 4.2$  Hz, 1H), 7.18 (d,  $J = 15.8$  Hz, 1H), 3.81 (s, 3H), 3.35 (s, 3H).  $^{13}\text{C}$  NMR (151 MHz,  $\text{CDCl}_3$ )  $\delta$  166.69, 151.14, 148.94, 142.51, 136.44, 133.41, 130.10, 129.18, 128.34, 127.39, 121.79, 117.11, 62.01, 32.57. HRMS (ESI-TOF)  $m/z$  Calcd for  $\text{C}_{14}\text{H}_{15}\text{N}_2\text{O}_2^+$   $[\text{M}+\text{H}]^+$  243.1134, found 243.1140. IR (film)  $\nu_{\text{max}}$  2935, 1652, 1612, 1501, 1462, 1416, 1385, 1178, 1119, 1097, 999, 833,  $\text{cm}^{-1}$ .

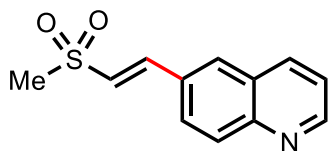

**(E)-6-(2-(Methylsulfonyl)vinyl)quinoline (2ao)** The general procedure 2.4 was followed and purification by preparative TLC (EA/acetone = 10/1) furnished compound **2ao** as a white solid (15.8 mg, 68%, C6:others = 95:5). TLC:  $R_f = 0.3$  (EA/acetone = 10/1). mp: 90-92 °C.  $^1\text{H}$  NMR (600 MHz,  $\text{CDCl}_3$ )  $\delta$  8.98 (dd,  $J = 4.2, 1.7$  Hz, 1H), 8.21 (dd,  $J = 8.1, 1.3$  Hz, 1H), 8.15 (d,  $J = 8.8$  Hz, 1H), 7.96 (d,  $J = 2.0$  Hz, 1H), 7.86 (dd,  $J = 8.8, 2.1$  Hz, 1H), 7.81 (d,  $J = 15.4$  Hz, 1H), 7.48 (dd,  $J = 8.2, 4.2$  Hz, 1H), 7.07 (d,  $J = 15.4$  Hz, 1H), 3.09 (s, 3H).  $^{13}\text{C}$  NMR (151 MHz,  $\text{CDCl}_3$ )  $\delta$  152.04, 149.37, 143.11, 136.64, 130.77, 130.56, 130.29, 128.19, 127.41, 127.04, 122.20, 43.32. HRMS (ESI-TOF)  $m/z$  Calcd for  $\text{C}_{12}\text{H}_{12}\text{NO}_2\text{S}^+$   $[\text{M}+\text{H}]^+$  234.0589, found 234.0595. IR (film)  $\nu_{\text{max}}$  1619, 1586, 1502, 1289, 1130, 970, 831, 808  $\text{cm}^{-1}$ .

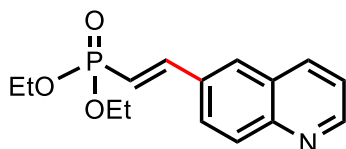

**Diethyl (E)-2-(quinolin-6-yl)vinylphosphonate (2ap)** The general procedure 2.4 was followed and purification by preparative TLC (EA/acetone = 1/1) furnished compound **2ap** as colorless oil (19.3 mg, 66%, C6:others = 96:4). TLC:  $R_f = 0.5$  (EA/acetone = 1/1).  $^1\text{H}$  NMR (600



MHz, CDCl<sub>3</sub>) δ 8.94 (dd, *J* = 4.2, 1.7 Hz, 1H), 8.18 (dd, *J* = 8.4, 1.2 Hz, 1H), 8.11 (d, *J* = 8.6 Hz, 1H), 7.90 (dd, *J* = 11.0, 2.3 Hz, 2H), 7.68 (dd, *J* = 22.4, 17.5 Hz, 1H), 7.44 (dd, *J* = 8.3, 4.2 Hz, 1H), 6.42 (t, *J* = 17.2 Hz, 1H), 4.21 – 4.14 (m, 4H), 1.38 (t, *J* = 7.1 Hz, 6H). <sup>13</sup>C NMR (151 MHz, CDCl<sub>3</sub>) δ 151.39, 149.03, 147.70 (d, *J* = 6.8 Hz), 136.54, 133.05 (d, *J* = 23.6 Hz), 130.26, 128.89 (d, *J* = 1.2 Hz), 128.22 (d, *J* = 1.4 Hz), 126.94, 121.89, 115.66 (d, *J* = 191.0 Hz), 62.01, 61.98, 16.47, 16.43. HRMS (ESI-TOF) *m/z* Calcd for C<sub>15</sub>H<sub>19</sub>NO<sub>3</sub>P<sup>+</sup> [M+H]<sup>+</sup> 292.1103, found 292.1107. IR (film) ν<sub>max</sub> 2983, 1614, 1586, 1501, 1386, 1237, 1163, 1048, 1022, 961, 855, 819 cm<sup>-1</sup>.

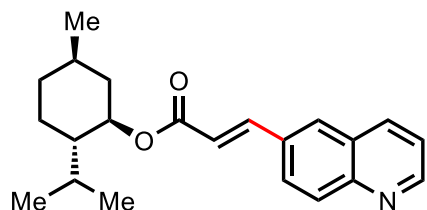

**(1*R*,2*S*,5*R*)-2-Isopropyl-5-methylcyclohexyl (*E*)-3-(quinolin-6-yl)acrylate (2aq)** The general procedure 2.4 was followed and purification by preparative TLC (hexane/EA = 5/1) furnished compound **2aq** as colorless oil (22.6 mg, 67%, C<sub>6</sub>:others = 94:6). TLC: R<sub>f</sub> = 0.3 (hexane/EA = 10/1). <sup>1</sup>H NMR (600 MHz, CDCl<sub>3</sub>) δ 8.93 (dd, *J* = 4.2, 1.7 Hz, 1H), 8.19 – 8.16 (m, 1H), 8.10 (d, *J* = 9.3 Hz, 1H), 7.92 (td, *J* = 4.5, 1.9 Hz, 2H), 7.84 (d, *J* = 15.8 Hz, 1H), 7.44 (dd, *J* = 8.3, 4.2 Hz, 1H), 6.58 (d, *J* = 16.0 Hz, 1H), 4.86 (td, *J* = 10.9, 4.5 Hz, 1H), 2.09 (dtd, *J* = 12.1, 4.2, 3.7, 1.7 Hz, 1H), 1.95 (pd, *J* = 7.0, 2.7 Hz, 1H), 1.72 (dt, *J* = 12.7, 3.0 Hz, 2H), 1.59 – 1.51 (m, 1H), 1.50 – 1.45 (m, 1H), 1.15 – 1.04 (m, 2H), 0.93 (dd, *J* = 6.8, 2.4 Hz, 7H), 0.81 (d, *J* = 6.9 Hz, 3H). <sup>13</sup>C NMR (151 MHz, CDCl<sub>3</sub>) δ 166.37, 151.30, 149.03, 143.38, 136.44, 132.82, 130.24, 129.16, 128.27, 127.32, 121.84, 120.12, 74.51, 47.23, 41.04, 34.31, 31.45, 26.39, 23.55, 22.06, 20.79, 16.46. HRMS (ESI-TOF) *m/z* Calcd for C<sub>22</sub>H<sub>28</sub>NO<sub>2</sub><sup>+</sup> [M+H]<sup>+</sup> 338.2120, found 338.2120. [α]<sub>D</sub><sup>21</sup> = – 47.2 (*c* 0.1, CHCl<sub>3</sub>). IR (film) ν<sub>max</sub> 2953, 2869, 1705, 1636, 1501, 1456, 1383, 1330, 1303, 1280, 1173, 1013, 983, 835 cm<sup>-1</sup>.

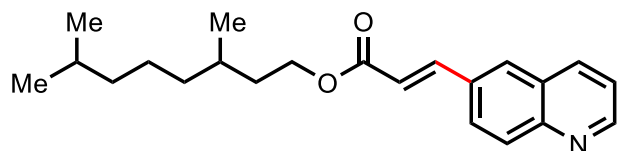

**3,7-Dimethyloctyl (*E*)-3-(quinolin-6-yl)acrylate (**2ar**)** The general procedure 2.4 was followed and purification by preparative TLC (hexane/EA = 5/1) furnished compound **2ar** as colorless oil (23.0 mg, 68%, C6:others = 94:6). TLC:  $R_f = 0.3$  (hexane/EA = 10/1).  $^1\text{H}$  NMR (600 MHz,  $\text{CDCl}_3$ )  $\delta$  8.93 (dd,  $J = 4.2, 1.7$  Hz, 1H), 8.17 (dd,  $J = 8.4, 1.4$  Hz, 1H), 8.10 (d,  $J = 9.3$  Hz, 1H), 7.92 – 7.90 (m, 2H), 7.84 (d,  $J = 16.0$  Hz, 1H), 7.44 (dd,  $J = 8.2, 4.2$  Hz, 1H), 6.58 (d,  $J = 15.9$  Hz, 1H), 4.31 – 4.25 (m, 2H), 1.79 – 1.74 (m, 1H), 1.65 – 1.59 (m, 1H), 1.56 – 1.50 (m, 2H), 1.36 – 1.31 (m, 2H), 1.30 – 1.25 (m, 1H), 1.20 – 1.14 (m, 3H), 0.95 (d,  $J = 6.7$  Hz, 3H), 0.88 (dd,  $J = 6.6, 1.4$  Hz, 6H).  $^{13}\text{C}$  NMR (151 MHz,  $\text{CDCl}_3$ )  $\delta$  166.88, 151.34, 149.05, 143.56, 136.45, 132.74, 130.28, 129.22, 128.26, 127.28, 121.86, 119.69, 63.36, 39.23, 37.17, 35.63, 29.92, 27.97, 24.64, 22.71, 22.62, 19.58. HRMS (ESI-TOF)  $m/z$  Calcd for  $\text{C}_{22}\text{H}_{30}\text{NO}_2^+$   $[\text{M}+\text{H}]^+$  340.2277, found 340.2276. IR (film)  $\nu_{\text{max}}$  2954, 2926, 2868, 1711, 1638, 1501, 1462, 1383, 1329, 1304, 1280, 1173, 981, 835  $\text{cm}^{-1}$ .

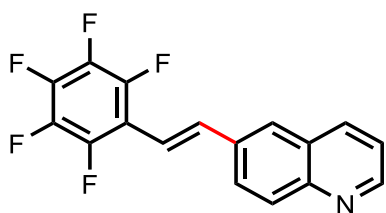

**(*E*)-6-(2-(Perfluorophenyl)vinyl)quinoline (**2as**)** The general procedure 2.4 was followed and purification by preparative TLC (hexane/EA = 5/1) furnished compound **2as** as a pale yellow solid (26.3 mg, 82%, C6:others = 91:9). TLC:  $R_f = 0.3$  (hexane/EA = 10/1). mp: 108-110  $^{\circ}\text{C}$ .  $^1\text{H}$  NMR (600 MHz,  $\text{CDCl}_3$ )  $\delta$  8.91 (dd,  $J = 4.2, 1.7$  Hz, 1H), 8.17 (dd,  $J = 8.7, 1.1$  Hz, 1H), 8.12 (d,  $J = 8.8$  Hz, 1H), 7.97 (dd,  $J = 8.9, 2.0$  Hz, 1H), 7.86 (d,  $J = 2.0$  Hz, 1H), 7.60 (d,  $J = 16.8$  Hz, 1H), 7.43 (dd,  $J = 8.2, 4.2$  Hz, 1H), 7.13 (d,  $J = 16.7$  Hz, 1H).  $^{13}\text{C}$  NMR (151 MHz,  $\text{CDCl}_3$ )  $\delta$  150.83, 148.54, 144.92 (dm,  $J = 251.2$  Hz), 139.96 (dm,  $J = 255.0$  Hz), 137.82 (dm,  $J = 252.4$  Hz), 136.34 – 136.14 (m), 136.20, 134.65, 130.15, 128.43, 127.34, 126.70, 121.79, 114.09 (d,  $J = 2.9$  Hz), 112.14 (td,  $J = 13.6, 4.3$  Hz).  $^{19}\text{F}$  NMR (376 MHz,  $\text{CDCl}_3$ )  $\delta$  -145.09 (dd,  $J = 21.4, 8.6$  Hz, 2F), -158.42 (t,  $J = 21.0$  Hz, 1F), -165.29 (td,  $J = 21.0, 7.3$  Hz, 2F). HRMS (ESI-TOF)  $m/z$  Calcd for  $\text{C}_{17}\text{H}_9\text{F}_5\text{N}^+$   $[\text{M}+\text{H}]^+$  322.0655, found 322.0662. IR (film)  $\nu_{\text{max}}$  1520, 1494, 1130, 1003, 964, 899, 829, 764  $\text{cm}^{-1}$ .

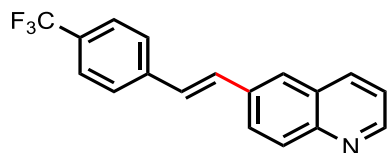

**(E)-6-(4-(Trifluoromethyl)styryl)quinoline (2at)** The general procedure 2.7 was followed and purification by preparative TLC (hexane/EA = 3/1) furnished compound **2at** as a white solid (19.1 mg, 64%, C6:others = 91:9). TLC:  $R_f = 0.3$  (hexane/EA = 5/1). mp: 143-145 °C.  $^1\text{H}$  NMR (600 MHz,  $\text{CDCl}_3$ )  $\delta$  8.83 (dd,  $J = 4.2, 1.7$  Hz, 1H), 8.09 (d,  $J = 8.2$  Hz, 1H), 8.04 (d,  $J = 8.8$  Hz, 1H), 7.92 (dd,  $J = 8.8, 2.0$  Hz, 1H), 7.80 (d,  $J = 2.0$  Hz, 1H), 7.63 – 7.53 (m, 4H), 7.35 (dd,  $J = 8.3, 4.2$  Hz, 1H), 7.29 (d,  $J = 16.3$  Hz, 1H), 7.21 (d,  $J = 16.2$  Hz, 1H).  $^{13}\text{C}$  NMR (151 MHz,  $\text{CDCl}_3$ )  $\delta$  150.52, 148.34, 140.50, 136.05, 134.89, 130.38, 130.04, 129.63 (q,  $J = 3.8$  Hz), 128.59, 128.55, 127.13, 126.74, 126.65, 125.75 (q,  $J = 3.8$  Hz), 124.18 (q,  $J = 272.0$  Hz), 121.70.  $^{19}\text{F}$  NMR (376 MHz,  $\text{CDCl}_3$ )  $\delta$  -65.15. HRMS (ESI-TOF)  $m/z$  Calcd for  $\text{C}_{18}\text{H}_{13}\text{F}_3\text{N}^+$   $[\text{M}+\text{H}]^+$  300.1000, found 300.1010. IR (film)  $\nu_{\text{max}}$  1330, 1276, 1164, 1111, 1069, 953, 865, 831, 750  $\text{cm}^{-1}$ .

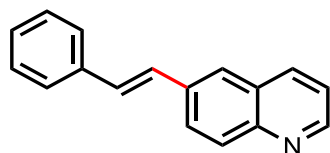

**(E)-6-Styrylquinoline (2au)** The general procedure 2.7 was followed and purification by preparative TLC (hexane/EA = 5/1) furnished compound **2au** as a white solid (14.3 mg, 62%, C6:others = 90:10). TLC:  $R_f = 0.3$  (hexane/EA = 10/1). mp: 100-102 °C.  $^1\text{H}$  NMR (600 MHz,  $\text{CDCl}_3$ )  $\delta$  8.79 (dd,  $J = 4.2, 1.7$  Hz, 1H), 8.06 (d,  $J = 7.8$  Hz, 1H), 8.01 (d,  $J = 8.8$  Hz, 1H), 7.90 (dd,  $J = 8.8, 2.0$  Hz, 1H), 7.74 (d,  $J = 2.0$  Hz, 1H), 7.49 (dd,  $J = 8.2, 1.3$  Hz, 2H), 7.33 – 7.30 (m, 3H), 7.23 – 7.21 (m, 1H), 7.19 (d,  $J = 6.6$  Hz, 2H).  $^{13}\text{C}$  NMR (151 MHz,  $\text{CDCl}_3$ )  $\delta$  150.15, 148.12, 137.03, 135.95, 135.61, 130.23, 129.82, 128.81, 128.61, 128.03, 127.87, 127.27, 126.68, 125.94, 121.55. HRMS (ESI-TOF)  $m/z$  Calcd for  $\text{C}_{17}\text{H}_{14}\text{N}^+$   $[\text{M}+\text{H}]^+$  232.1126, found 232.1134. IR (film)  $\nu_{\text{max}}$  3029, 1592, 1500, 1447, 1380, 1325, 1154, 1121, 959, 889, 828, 692  $\text{cm}^{-1}$ .

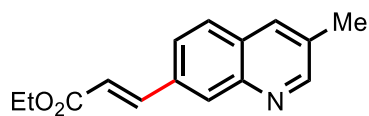

**Ethyl (*E*)-3-(3-methylquinolin-7-yl)acrylate (3a)** The general procedure 2.5 was followed and purification by preparative TLC (DCM/EA = 10/1) furnished compound **3a** as a white solid (7.7 mg, 64%, C7:others = 96:4). TLC:  $R_f$  = 0.3 (hexane/EA = 20/1). mp: 103-105 °C.  $^1\text{H}$  NMR (600 MHz,  $\text{CDCl}_3$ )  $\delta$  8.79 (d,  $J$  = 2.2 Hz, 1H), 8.16 (s, 1H), 7.90 (s, 1H), 7.86 (d,  $J$  = 16.0 Hz, 1H), 7.74 (d,  $J$  = 8.5 Hz, 1H), 7.69 (dd,  $J$  = 8.5, 1.7 Hz, 1H), 6.58 (d,  $J$  = 16.0 Hz, 1H), 4.30 (q,  $J$  = 7.1 Hz, 2H), 2.53 (s, 3H), 1.37 (t,  $J$  = 7.1 Hz, 3H).  $^{13}\text{C}$  NMR (151 MHz,  $\text{CDCl}_3$ )  $\delta$  166.86, 153.27, 146.55, 144.09, 134.61, 134.43, 131.66, 130.41, 129.10, 127.84, 124.57, 119.51, 60.67, 18.87, 14.35. HRMS (ESI-TOF)  $m/z$  Calcd for  $\text{C}_{15}\text{H}_{16}\text{NO}_2^+$   $[\text{M}+\text{H}]^+$  242.1181, found 242.1185. IR (film)  $\nu_{\text{max}}$  2981, 1709, 1631, 1368, 1308, 1293, 1282, 1237, 1178, 1151, 1037, 996, 891, 861, 813  $\text{cm}^{-1}$ .

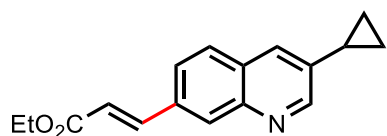

**Ethyl (*E*)-3-(3-cyclopropylquinolin-7-yl)acrylate (3b)** The general procedure 2.5 was followed and purification by preparative TLC (hexane/EA = 10/1) furnished compound **3b** as a white solid (9.5 mg, 71%, C7:others = 96:4). TLC:  $R_f$  = 0.3 (hexane/EA = 20/1). mp: 74-76 °C.  $^1\text{H}$  NMR (600 MHz,  $\text{CDCl}_3$ )  $\delta$  8.77 (s, 1H), 8.15 (s, 1H), 7.86 (d,  $J$  = 16.0 Hz, 1H), 7.72 (d,  $J$  = 8.5 Hz, 1H), 7.68 (dd,  $J$  = 8.4, 1.8 Hz, 2H), 6.58 (d,  $J$  = 16.0 Hz, 1H), 4.30 (q,  $J$  = 7.2 Hz, 2H), 2.08 (td,  $J$  = 8.4, 4.2 Hz, 1H), 1.36 (t,  $J$  = 7.2 Hz, 3H), 1.16 – 1.11 (m, 2H), 0.89 – 0.86 (m, 2H).  $^{13}\text{C}$  NMR (151 MHz,  $\text{CDCl}_3$ )  $\delta$  166.87, 151.48, 146.67, 144.10, 138.02, 134.43, 130.40, 129.09, 127.85, 124.61, 119.40, 60.66, 14.35, 13.53, 9.54. HRMS (ESI-TOF)  $m/z$  Calcd for  $\text{C}_{17}\text{H}_{18}\text{NO}_2^+$   $[\text{M}+\text{H}]^+$  268.1338, found 268.1342. IR (film)  $\nu_{\text{max}}$  3077, 2983, 2928, 1705, 1632, 1606, 1365, 1307, 1295, 1275, 1171, 1130, 1045, 868, 814  $\text{cm}^{-1}$ .

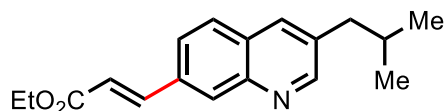

**Ethyl (*E*)-3-(3-isobutylquinolin-7-yl)acrylate (3c)** The general procedure 2.5 was followed and purification by preparative TLC (hexane/EA = 10/1) furnished compound **3c** as a white solid (10.3 mg, 73%, C7:others = 95:5). TLC:  $R_f$  = 0.3 (hexane/EA = 20/1). mp: 73-75 °C.  $^1\text{H}$  NMR

(600 MHz, CDCl<sub>3</sub>)  $\delta$  8.77 (d,  $J$  = 2.2 Hz, 1H), 8.17 (s, 1H), 7.90 – 7.85 (m, 2H), 7.77 (d,  $J$  = 8.5 Hz, 1H), 7.71 (dd,  $J$  = 8.5, 1.7 Hz, 1H), 6.59 (d,  $J$  = 16.0 Hz, 1H), 4.30 (q,  $J$  = 7.1 Hz, 2H), 2.67 (d,  $J$  = 7.2 Hz, 2H), 2.00 (dq,  $J$  = 13.6, 6.7 Hz, 1H), 1.37 (t,  $J$  = 7.1 Hz, 3H), 0.97 (d,  $J$  = 6.6 Hz, 6H). <sup>13</sup>C NMR (151 MHz, CDCl<sub>3</sub>)  $\delta$  166.86, 153.34, 146.80, 144.10, 135.35, 134.69, 134.66, 130.38, 129.07, 128.04, 124.50, 119.52, 60.67, 42.60, 30.15, 22.27, 14.36. HRMS (ESI-TOF)  $m/z$  Calcd for C<sub>18</sub>H<sub>22</sub>NO<sub>2</sub><sup>+</sup> [M+H]<sup>+</sup> 284.1651, found 284.1659. IR (film)  $\nu_{\text{max}}$  2954, 2868, 1707, 1633, 1462, 1367, 1313, 1267, 1179, 994, 911, 819, 749 cm<sup>-1</sup>.

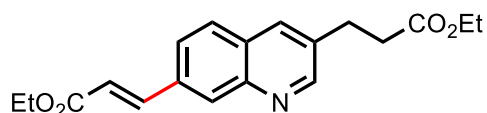

**Ethyl (*E*)-3-(3-(3-ethoxy-3-oxopropyl)quinolin-7-yl)acrylate (3d)** The general procedure 2.5 was followed and purification by preparative TLC (hexane/EA = 3/1) furnished compound **3d** as a white solid (10 mg, 61%, C7:others = 96:4). TLC:  $R_f$  = 0.3 (hexane/EA = 5/1). mp: 85-87 °C. <sup>1</sup>H NMR (600 MHz, CDCl<sub>3</sub>)  $\delta$  8.83 (d,  $J$  = 2.2 Hz, 1H), 8.17 (s, 1H), 7.95 (s, 1H), 7.86 (d,  $J$  = 16.0 Hz, 1H), 7.77 (d,  $J$  = 8.5 Hz, 1H), 7.71 (dd,  $J$  = 8.5, 1.5 Hz, 1H), 6.59 (d,  $J$  = 16.0 Hz, 1H), 4.30 (q,  $J$  = 7.1 Hz, 2H), 4.14 (q,  $J$  = 7.1 Hz, 2H), 3.15 (t,  $J$  = 7.5 Hz, 2H), 2.74 (t,  $J$  = 7.5 Hz, 2H), 1.37 (t,  $J$  = 7.0 Hz, 3H), 1.23 (t,  $J$  = 7.1 Hz, 3H). <sup>13</sup>C NMR (151 MHz, CDCl<sub>3</sub>)  $\delta$  172.23, 166.80, 152.57, 147.02, 143.95, 135.04, 134.34, 134.21, 130.36, 128.97, 128.11, 124.72, 119.76, 60.70, 35.24, 28.26, 14.35, 14.20. HRMS (ESI-TOF)  $m/z$  Calcd for C<sub>19</sub>H<sub>22</sub>NO<sub>4</sub><sup>+</sup> [M+H]<sup>+</sup> 328.1549, found 328.1555. IR (film)  $\nu_{\text{max}}$  2978, 2934, 1732, 1705, 1632, 1367, 1286, 1166, 1038, 980, 904, 859, 815, 739 cm<sup>-1</sup>.

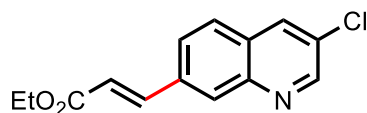

**Ethyl (*E*)-3-(3-chloroquinolin-7-yl)acrylate (3e)** The general procedure 2.5 was followed and purification by preparative TLC (DCM/EA = 10:1) furnished compound **3e** as a white solid (8.1 mg, 62%, C7:others = 95:5). TLC:  $R_f$  = 0.3 (hexane/EA = 20/1). mp: 71-73 °C. <sup>1</sup>H NMR (600 MHz, CDCl<sub>3</sub>)  $\delta$  8.85 (d,  $J$  = 2.4 Hz, 1H), 8.18 (s, 1H), 8.13 (dd,  $J$  = 2.4, 0.8 Hz, 1H), 7.85 (d,  $J$  = 16.0 Hz, 1H), 7.76 (s, 2H), 6.61 (d,  $J$  = 16.0 Hz, 1H), 4.30 (t,  $J$  = 7.1 Hz, 2H), 1.37 (t,  $J$  = 7.1 Hz, 3H). <sup>13</sup>C NMR (151 MHz, CDCl<sub>3</sub>)  $\delta$  166.61, 150.54, 146.30, 143.40, 135.80, 133.72, 130.34,

129.42, 129.23, 127.66, 125.75, 120.49, 60.79, 14.33. HRMS (ESI-TOF)  $m/z$  Calcd for  $C_{14}H_{13}ClNO_2^+$   $[M+H]^+$  262.0635, found 262.0636. IR (film)  $\nu_{max}$  2986, 1715, 1641, 1446, 1371, 1261, 1177, 1088, 902, 764, 750  $cm^{-1}$ .

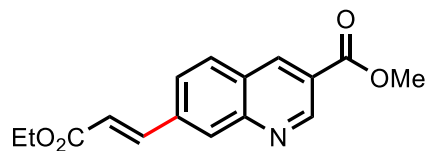

**Methyl (*E*)-7-(3-ethoxy-3-oxoprop-1-en-1-yl)quinoline-3-carboxylate (3f)** The general procedure 2.5 was followed and purification by preparative TLC (DCM/EA = 5/1) furnished compound **3f** as a white solid (7.4 mg, 52%, C7:others = 94:6). TLC:  $R_f$  = 0.3 (hexane/EA = 10/1). mp: 121-123 °C.  $^1H$  NMR (600 MHz,  $CDCl_3$ )  $\delta$  9.47 (d,  $J$  = 2.1 Hz, 1H), 8.82 (d,  $J$  = 1.9 Hz, 1H), 8.25 (s, 1H), 7.94 (d,  $J$  = 8.5 Hz, 1H), 7.88 (d,  $J$  = 16.0 Hz, 1H), 7.79 (dd,  $J$  = 8.5, 1.7 Hz, 1H), 6.65 (d,  $J$  = 16.0 Hz, 1H), 4.32 (q,  $J$  = 7.1 Hz, 2H), 4.03 (s, 3H), 1.37 (t,  $J$  = 7.1 Hz, 3H).  $^{13}C$  NMR (151 MHz,  $CDCl_3$ )  $\delta$  166.49, 165.63, 150.85, 149.97, 143.26, 138.31, 137.86, 130.22, 129.71, 127.68, 125.48, 123.60, 121.32, 60.87, 52.62, 14.33. HRMS (ESI-TOF)  $m/z$  Calcd for  $C_{16}H_{16}NO_4^+$   $[M+H]^+$  286.1079, found 286.1084. IR (film)  $\nu_{max}$  3006, 1705, 1632, 1445, 1380, 1308, 1276, 1261, 1179, 993, 819, 750  $cm^{-1}$ .

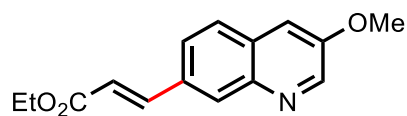

**Ethyl (*E*)-3-(3-methoxyquinolin-7-yl)acrylate (3g)** The general procedure 2.5 was followed and purification by preparative TLC (DCM/EA = 5/1) furnished compound **3g** as a white solid (9.4 mg, 73%, C7:others > 99:1). TLC:  $R_f$  = 0.3 (hexane/EA = 10/1). mp: 90-92 °C.  $^1H$  NMR (600 MHz,  $CDCl_3$ )  $\delta$  8.69 (d,  $J$  = 2.8 Hz, 1H), 8.14 (s, 1H), 7.85 (d,  $J$  = 16.0 Hz, 1H), 7.71 (q,  $J$  = 8.5 Hz, 2H), 7.36 (d,  $J$  = 2.9 Hz, 1H), 6.56 (d,  $J$  = 16.1 Hz, 1H), 4.30 (q,  $J$  = 7.1 Hz, 2H), 3.97 (s, 3H), 1.36 (t,  $J$  = 7.1 Hz, 3H).  $^{13}C$  NMR (151 MHz,  $CDCl_3$ )  $\delta$  166.95, 153.84, 145.49, 144.15, 143.36, 132.92, 130.37, 130.02, 127.33, 125.19, 118.82, 111.94, 60.61, 55.59, 14.36. HRMS (ESI-TOF)  $m/z$  Calcd for  $C_{15}H_{16}NO_3^+$   $[M+H]^+$  258.1130, found 258.1128. IR (film)  $\nu_{max}$  2978, 1708, 1635, 1606, 1458, 1369, 1350, 1282, 1232, 1175, 1152, 1028, 879, 864, 811  $cm^{-1}$ .

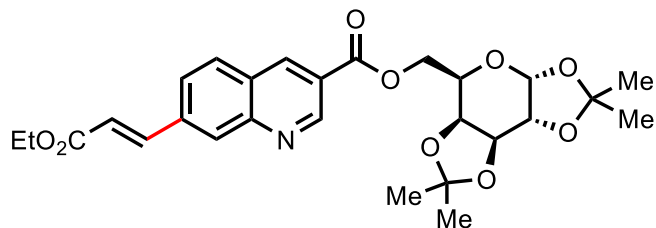

**((3aR,5R,5aS,8aS,8bR)-2,2,7,7-tetramethyltetrahydro-5H-bis([1,3]dioxolo)[4,5-b:4',5'-d]pyran-5-yl)methyl 7-((E)-3-ethoxy-3-oxoprop-1-en-1-yl)quinoline-3-carboxylate (3h)** The general procedure 2.5 was followed and purification by preparative TLC (DCM/EA = 5/1) furnished compound **3h** as colorless oil (12.8 mg, 50%, C7:others = 94:6). TLC:  $R_f$  = 0.3 (hexane/EA = 10/1).  $^1\text{H}$  NMR (600 MHz,  $\text{CDCl}_3$ )  $\delta$  9.48 (d,  $J$  = 2.1 Hz, 1H), 8.83 (d,  $J$  = 1.8 Hz, 1H), 8.24 (s, 1H), 7.94 (d,  $J$  = 8.5 Hz, 1H), 7.88 (d,  $J$  = 16.0 Hz, 1H), 7.79 (dd,  $J$  = 8.5, 1.7 Hz, 1H), 6.65 (d,  $J$  = 16.0 Hz, 1H), 5.58 (d,  $J$  = 4.9 Hz, 1H), 4.68 (dd,  $J$  = 7.9, 2.5 Hz, 1H), 4.62 (dd,  $J$  = 11.6, 4.5 Hz, 1H), 4.55 (dd,  $J$  = 11.5, 7.8 Hz, 1H), 4.38 – 4.34 (m, 2H), 4.32 (q,  $J$  = 7.1 Hz, 2H), 4.25 (ddd,  $J$  = 7.8, 4.4, 1.9 Hz, 1H), 1.52 (d,  $J$  = 20.1 Hz, 6H), 1.39 – 1.36 (m, 6H), 1.34 (s, 3H).  $^{13}\text{C}$  NMR (151 MHz,  $\text{CDCl}_3$ )  $\delta$  166.49, 165.02, 150.93, 150.01, 143.28, 138.43, 137.87, 130.22, 129.76, 127.67, 125.44, 123.52, 121.31, 109.84, 108.89, 96.35, 71.16, 70.78, 70.51, 66.13, 64.62, 60.86, 26.07, 26.00, 24.97, 24.50, 14.33. HRMS (ESI-TOF)  $m/z$  Calcd for  $\text{C}_{27}\text{H}_{32}\text{NO}_9^+$   $[\text{M}+\text{H}]^+$  514.2077, found 514.2077.  $[\alpha]_D^{21} = -60.4$  ( $c$  0.1,  $\text{CHCl}_3$ ). IR (film)  $\nu_{\text{max}}$  2986, 2932, 1717, 1639, 1620, 1453, 1378, 1289, 1249, 1206, 1173, 1101, 1069, 1005, 896, 763  $\text{cm}^{-1}$ .

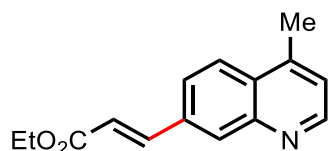

**Ethyl (E)-3-(4-methylquinolin-7-yl)acrylate (3i)** The general procedure 2.5 was followed and purification by preparative TLC (DCM/EA = 5/1) furnished compound **3i** as a white solid (6.6 mg, 55%, C7:others > 99:1). TLC:  $R_f$  = 0.3 (hexane/EA = 10/1). mp: 75-77 °C.  $^1\text{H}$  NMR (600 MHz,  $\text{CDCl}_3$ )  $\delta$  8.80 (d,  $J$  = 4.3 Hz, 1H), 8.20 (d,  $J$  = 1.8 Hz, 1H), 8.01 (d,  $J$  = 8.7 Hz, 1H), 7.88 (d,  $J$  = 16.0 Hz, 1H), 7.75 (dd,  $J$  = 8.7, 1.9 Hz, 1H), 7.25 (s, 1H), 6.62 (d,  $J$  = 16.0 Hz, 1H), 4.31 (q,  $J$  = 7.0 Hz, 2H), 2.72 (s, 3H), 1.37 (t,  $J$  = 7.1 Hz, 3H).  $^{13}\text{C}$  NMR (151 MHz,  $\text{CDCl}_3$ )  $\delta$  166.79,

151.03, 148.08, 144.24, 143.88, 135.20, 131.03, 129.23, 124.64, 124.27, 122.70, 119.95, 60.71, 18.62, 14.35. HRMS (ESI-TOF)  $m/z$  Calcd for  $C_{15}H_{16}NO_2^+$   $[M+H]^+$  242.1181, found 242.1187. IR (film)  $\nu_{max}$  2983, 2924, 1709, 1636, 1594, 1448, 1368, 1318, 1266, 1164, 1036, 983, 842, 749  $cm^{-1}$ .

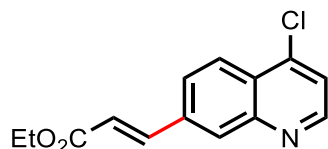

**Ethyl (*E*)-3-(4-chloroquinolin-7-yl)acrylate (3j)** The general procedure 2.5 was followed and purification by preparative TLC (DCM/EA = 5/1) furnished compound **3j** as a white solid (5.6 mg, 43%, C7:others = 94:6). TLC:  $R_f$  = 0.3 (hexane/EA = 10/1). mp: 92-94 °C.  $^1H$  NMR (600 MHz,  $CDCl_3$ )  $\delta$  8.81 (d,  $J$  = 4.7 Hz, 1H), 8.25 (d,  $J$  = 8.7 Hz, 1H), 8.21 (d,  $J$  = 1.7 Hz, 1H), 7.88 (d,  $J$  = 16.0 Hz, 1H), 7.82 (dd,  $J$  = 8.8, 1.8 Hz, 1H), 7.51 (d,  $J$  = 4.6 Hz, 1H), 6.64 (d,  $J$  = 16.0 Hz, 1H), 4.31 (q,  $J$  = 7.1 Hz, 2H), 1.37 (t,  $J$  = 7.1 Hz, 3H).  $^{13}C$  NMR (151 MHz,  $CDCl_3$ )  $\delta$  166.55, 150.75, 149.28, 143.17, 142.56, 136.53, 130.59, 127.33, 125.59, 124.96, 121.93, 120.97, 60.83, 14.33. HRMS (ESI-TOF)  $m/z$  Calcd for  $C_{14}H_{13}ClNO_2^+$   $[M+H]^+$  262.0635, found 262.0639. IR (film)  $\nu_{max}$  2925, 1715, 1638, 1584, 1554, 1500, 1371, 1314, 1281, 1205, 1177, 976, 823  $cm^{-1}$ .

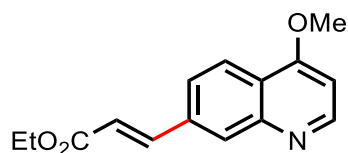

**Ethyl (*E*)-3-(4-methoxyquinolin-7-yl)acrylate (3k)** The general procedure 2.5 was followed and purification by preparative TLC (DCM/EA = 1/1) furnished compound **3k** as a white solid (6.4 mg, 50%, C7:others = 93:7). TLC:  $R_f$  = 0.3 (hexane/EA = 2/1). mp: 103-105 °C.  $^1H$  NMR (600 MHz,  $CDCl_3$ )  $\delta$  8.78 (d,  $J$  = 5.2 Hz, 1H), 8.20 (d,  $J$  = 8.6 Hz, 1H), 8.12 (d,  $J$  = 1.7 Hz, 1H), 7.86 (d,  $J$  = 16.0 Hz, 1H), 7.68 (dd,  $J$  = 8.7, 1.7 Hz, 1H), 6.76 (d,  $J$  = 5.2 Hz, 1H), 6.60 (d,  $J$  = 16.0 Hz, 1H), 4.30 (q,  $J$  = 7.1 Hz, 2H), 4.06 (s, 3H), 1.37 (t,  $J$  = 7.1 Hz, 3H).  $^{13}C$  NMR (151 MHz,  $CDCl_3$ )  $\delta$  166.79, 162.15, 152.25, 149.27, 143.99, 135.81, 129.97, 123.61, 122.65, 122.25, 120.01, 100.90, 60.69, 55.82, 14.35. HRMS (ESI-TOF)  $m/z$  Calcd for  $C_{15}H_{16}NO_3^+$   $[M+H]^+$



258.1130, found 258.1139. IR (film)  $\nu_{\max}$  2980, 1708, 1636, 1594, 1567, 1510, 1451, 1388, 1370, 1318, 1267, 1159, 1111, 1038, 985, 818  $\text{cm}^{-1}$ .

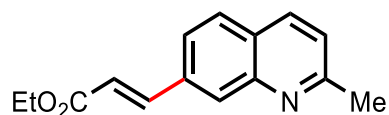

**Ethyl (*E*)-3-(2-methylquinolin-7-yl)acrylate (3l)** The general procedure 2.5 was followed and purification by preparative TLC (hexane/EA = 5/1) furnished compound **3l** as colorless oil (5.4 mg, 45%, C7:others = 94:6). TLC:  $R_f$  = 0.3 (hexane/EA = 10/1).  $^1\text{H}$  NMR (600 MHz,  $\text{CDCl}_3$ )  $\delta$  8.05 (d,  $J$  = 0.9 Hz, 1H), 7.96 (d,  $J$  = 8.3 Hz, 1H), 7.79 (dd,  $J$  = 16.0, 0.6 Hz, 1H), 7.70 (d,  $J$  = 8.4 Hz, 1H), 7.59 (dd,  $J$  = 8.4, 1.7 Hz, 1H), 7.24 (d,  $J$  = 8.3 Hz, 1H), 6.53 (d,  $J$  = 16.0 Hz, 1H), 4.23 (q,  $J$  = 7.2 Hz, 2H), 2.69 (s, 3H), 1.30 (t,  $J$  = 7.1 Hz, 3H).  $^{13}\text{C}$  NMR (151 MHz,  $\text{CDCl}_3$ )  $\delta$  166.86, 160.01, 147.94, 144.15, 135.82, 135.50, 129.76, 128.17, 127.48, 123.80, 122.90, 119.78, 60.68, 25.41, 14.36. HRMS (ESI-TOF)  $m/z$  Calcd for  $\text{C}_{15}\text{H}_{16}\text{NO}_2^+$   $[\text{M}+\text{H}]^+$  242.1181, found 242.1191. IR (film)  $\nu_{\max}$  2980, 2930, 1710, 1636, 1511, 1451, 1369, 1308, 1286, 1174, 1037, 982, 843  $\text{cm}^{-1}$ .

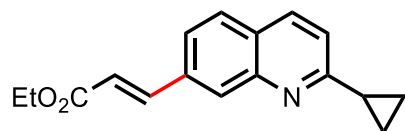

**Ethyl (*E*)-3-(2-cyclopropylquinolin-7-yl)acrylate (3m)** The general procedure 2.5 was followed and purification by preparative TLC (hexane/EA = 10/1) furnished compound **3m** as colorless oil (5.5 mg, 41%, C7:others = 96:4). TLC:  $R_f$  = 0.3 (hexane/EA = 20/1).  $^1\text{H}$  NMR (600 MHz,  $\text{CDCl}_3$ )  $\delta$  8.00 (d,  $J$  = 1.0 Hz, 1H), 7.90 (dd,  $J$  = 8.6, 0.8 Hz, 1H), 7.77 (d,  $J$  = 16.0 Hz, 1H), 7.66 (d,  $J$  = 8.5 Hz, 1H), 7.53 (dd,  $J$  = 8.4, 1.7 Hz, 1H), 7.14 (d,  $J$  = 8.5 Hz, 1H), 6.52 (d,  $J$  = 16.0 Hz, 1H), 4.22 (q,  $J$  = 7.1 Hz, 2H), 2.18 – 2.14 (m, 1H), 1.29 (t,  $J$  = 7.2 Hz, 3H), 1.12 – 1.10 (m, 1H), 1.05 – 1.03 (m, 1H).  $^{13}\text{C}$  NMR (151 MHz,  $\text{CDCl}_3$ )  $\delta$  166.91, 164.45, 148.06, 144.30, 135.38, 135.34, 129.81, 128.11, 127.73, 123.29, 120.55, 119.54, 60.63, 18.09, 14.35, 10.54. HRMS (ESI-TOF)  $m/z$  Calcd for  $\text{C}_{17}\text{H}_{18}\text{NO}_2^+$   $[\text{M}+\text{H}]^+$  268.1338, found 268.1349. IR (film)  $\nu_{\max}$  2926, 1710, 1636, 1604, 1511, 1453, 1367, 1303, 1285, 1173, 1033, 981, 841  $\text{cm}^{-1}$ .

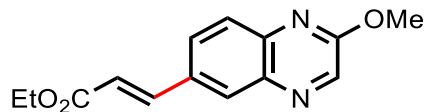

**Ethyl (*E*)-3-(2-methoxyquinoxalin-6-yl)acrylate (3n)** The general procedure 2.5 was followed and purification by preparative TLC (DCM/EA = 20/1) furnished compound **3n** as a white solid (7.5 mg, 58%, C6:others > 99:1). TLC:  $R_f$  = 0.3 (hexane/EA = 30/1). mp: 81-83 °C.  $^1\text{H}$  NMR (600 MHz,  $\text{CDCl}_3$ )  $\delta$  8.49 (s, 1H), 8.12 (d,  $J$  = 1.8 Hz, 1H), 7.87 – 7.83 (m, 3H), 6.56 (d,  $J$  = 16.0 Hz, 1H), 4.30 (q,  $J$  = 7.2 Hz, 2H), 4.12 (s, 3H), 1.36 (t,  $J$  = 7.1 Hz, 3H).  $^{13}\text{C}$  NMR (151 MHz,  $\text{CDCl}_3$ )  $\delta$  166.81, 158.22, 143.51, 141.63, 140.49, 138.79, 132.85, 129.62, 128.47, 127.83, 119.35, 60.68, 53.95, 14.35. HRMS (ESI-TOF)  $m/z$  Calcd for  $\text{C}_{14}\text{H}_{15}\text{N}_2\text{O}_3^+$   $[\text{M}+\text{H}]^+$  259.1083, found 259.1088. IR (film)  $\nu_{\text{max}}$  2946, 1711, 1638, 1577, 1459, 1391, 1342, 1317, 1271, 1219, 1175, 1142, 1019, 980, 832, 749  $\text{cm}^{-1}$ .

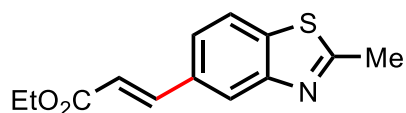

**Ethyl (*E*)-3-(2-methylbenzo[d]thiazol-5-yl)acrylate (3o)** The general procedure 2.5 was followed and purification by preparative TLC (DCM/EA = 20/1) furnished compound **3o** as a white solid (7.4 mg, 60%, C5:others = 94:6). TLC:  $R_f$  = 0.3 (hexane/EA = 30/1). mp: 56-58 °C.  $^1\text{H}$  NMR (600 MHz,  $\text{CDCl}_3$ )  $\delta$  8.07 (d,  $J$  = 1.7 Hz, 1H), 7.84 – 7.78 (m, 2H), 7.53 (dd,  $J$  = 8.3, 1.7 Hz, 1H), 6.51 (d,  $J$  = 16.0 Hz, 1H), 4.29 (q,  $J$  = 7.2 Hz, 2H), 2.85 (s, 3H), 1.36 (t,  $J$  = 7.1 Hz, 3H).  $^{13}\text{C}$  NMR (151 MHz,  $\text{CDCl}_3$ )  $\delta$  168.26, 166.95, 153.90, 144.33, 137.55, 132.71, 123.99, 122.21, 121.76, 118.54, 60.61, 20.25, 14.36. HRMS (ESI-TOF)  $m/z$  Calcd for  $\text{C}_{13}\text{H}_{14}\text{NO}_2\text{S}^+$   $[\text{M}+\text{H}]^+$  248.0745, found 248.0747. IR (film)  $\nu_{\text{max}}$  2980, 1709, 1636, 1524, 1454, 1422, 1367, 1274, 1232, 1176, 1157, 1064, 1038, 982, 861, 809  $\text{cm}^{-1}$ .

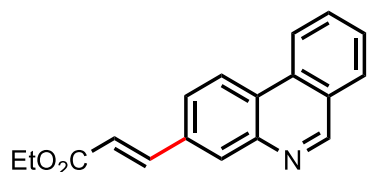

**Ethyl (*E*)-3-(phenanthridin-3-yl)acrylate (3p)** The general procedure 2.5 was followed and purification by preparative TLC (DCM/EA = 5/1) furnished compound **3p** as a white solid (10.6

mg, 77%,  $C_{\text{shown}}:\text{others} = 93:7$ ). TLC:  $R_f = 0.3$  (hexane/EA = 10/1). mp: 85-87 °C.  $^1\text{H}$  NMR (600 MHz,  $\text{CDCl}_3$ )  $\delta$  9.31 (s, 1H), 8.59 (dd,  $J = 17.9, 8.4$  Hz, 2H), 8.31 (d,  $J = 1.8$  Hz, 1H), 8.07 (d,  $J = 7.8$  Hz, 1H), 7.93 – 7.85 (m, 3H), 7.76 (t,  $J = 7.8$  Hz, 1H), 6.65 (d,  $J = 16.0$  Hz, 1H), 4.32 (q,  $J = 7.1$  Hz, 2H), 1.38 (t,  $J = 7.1$  Hz, 3H).  $^{13}\text{C}$  NMR (151 MHz,  $\text{CDCl}_3$ )  $\delta$  166.88, 154.42, 144.59, 143.87, 134.81, 132.15, 131.36, 130.63, 128.93, 128.14, 126.68, 125.56, 125.43, 122.97, 122.12, 119.57, 60.68, 14.37. HRMS (ESI-TOF)  $m/z$  Calcd for  $\text{C}_{18}\text{H}_{16}\text{NO}_2^+$   $[\text{M}+\text{H}]^+$  278.1181, found 278.1185. IR (film)  $\nu_{\text{max}}$  2984, 1731, 1708, 1638, 1616, 1480, 1442, 1371, 1252, 1190, 1162, 888, 820, 786, 751, 734  $\text{cm}^{-1}$ .

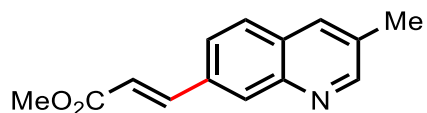

**Methyl (*E*)-3-(3-methylquinolin-7-yl)acrylate (3q)** The general procedure 2.5 was followed and purification by preparative TLC (DCM/EA = 10/1) furnished compound **3q** as a white solid (6.7 mg, 59%,  $C7:\text{others} = 95:5$ ). TLC:  $R_f = 0.3$  (hexane/EA = 20/1). mp: 150-152 °C.  $^1\text{H}$  NMR (600 MHz,  $\text{CDCl}_3$ )  $\delta$  8.80 (d,  $J = 2.2$  Hz, 1H), 8.16 (s, 1H), 7.91 (s, 1H), 7.88 (d,  $J = 16.0$  Hz, 1H), 7.75 (d,  $J = 8.5$  Hz, 1H), 7.69 (dd,  $J = 8.5, 1.8$  Hz, 1H), 6.59 (d,  $J = 16.0$  Hz, 1H), 3.84 (s, 3H), 2.54 (s, 3H).  $^{13}\text{C}$  NMR (151 MHz,  $\text{CDCl}_3$ )  $\delta$  167.29, 153.30, 146.53, 144.39, 134.52, 134.44, 131.72, 130.46, 129.14, 127.87, 124.57, 119.02, 51.84, 18.87. HRMS (ESI-TOF)  $m/z$  Calcd for  $\text{C}_{14}\text{H}_{14}\text{NO}_2^+$   $[\text{M}+\text{H}]^+$  228.1025, found 228.1027. IR (film)  $\nu_{\text{max}}$  2953, 1703, 1629, 1453, 1435, 1316, 1253, 1233, 1173, 1148, 1037, 1005, 880, 813,  $\text{cm}^{-1}$ .

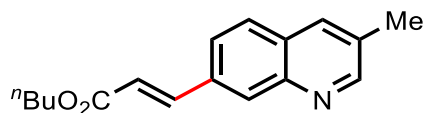

**Butyl (*E*)-3-(3-methylquinolin-7-yl)acrylate (3r)** The general procedure 2.5 was followed and purification by preparative TLC (DCM/EA = 10/1) furnished compound **3r** as a white solid (8.4 mg, 62%,  $C7:\text{others} = 95:5$ ). TLC:  $R_f = 0.3$  (hexane/EA = 20/1). mp: 68-70 °C.  $^1\text{H}$  NMR (600 MHz,  $\text{CDCl}_3$ )  $\delta$  8.79 (d,  $J = 2.2$  Hz, 1H), 8.16 (s, 1H), 7.90 (s, 1H), 7.86 (d,  $J = 16.0$  Hz, 1H), 7.74 (d,  $J = 8.5$  Hz, 1H), 7.70 (dd,  $J = 8.5, 1.8$  Hz, 1H), 6.59 (d,  $J = 16.0$  Hz, 1H), 4.25 (t,  $J = 6.7$  Hz, 2H), 2.53 (s, 3H), 1.74 – 1.69 (m, 2H), 1.49 – 1.44 (m, 2H), 0.98 (t,  $J = 7.4$  Hz, 3H).  $^{13}\text{C}$  NMR (151 MHz,  $\text{CDCl}_3$ )  $\delta$  166.96, 153.27, 146.55, 144.07, 134.63, 134.43, 131.66, 130.42,

129.10, 127.83, 124.57, 119.53, 64.60, 30.79, 19.22, 18.87, 13.77. HRMS (ESI-TOF)  $m/z$  Calcd for  $C_{17}H_{20}NO_2^+$   $[M+H]^+$  270.1494, found 270.1497. IR (film)  $\nu_{max}$  2958, 1706, 1633, 1456, 1339, 1309, 1292, 1280, 1065, 993, 888, 862, 811  $cm^{-1}$ .

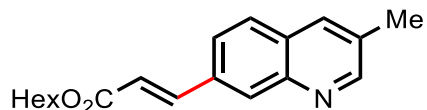

**Hexyl (*E*)-3-(3-methylquinolin-7-yl)acrylate (3s)** The general procedure 2.5 was followed and purification by preparative TLC (DCM) furnished compound **3s** as a white solid (9.0 mg, 61%, C7:others = 95:5). TLC:  $R_f$  = 0.3 (hexane/EA = 20/1). mp: 68-70 °C.  $^1H$  NMR (600 MHz,  $CDCl_3$ )  $\delta$  8.79 (d,  $J$  = 2.2 Hz, 1H), 8.16 (s, 1H), 7.90 (s, 1H), 7.86 (d,  $J$  = 16.0 Hz, 1H), 7.74 (d,  $J$  = 8.5 Hz, 1H), 7.70 (dd,  $J$  = 8.5, 1.7 Hz, 1H), 6.59 (d,  $J$  = 16.0 Hz, 1H), 4.23 (t,  $J$  = 6.8 Hz, 2H), 2.53 (s, 3H), 1.75 – 1.70 (m, 2H), 1.45 – 1.39 (m, 2H), 1.36 – 1.32 (m, 4H), 0.93 – 0.90 (m, 3H).  $^{13}C$  NMR (151 MHz,  $CDCl_3$ )  $\delta$  166.96, 153.27, 146.55, 144.06, 134.63, 134.43, 131.66, 130.43, 129.10, 127.83, 124.57, 119.54, 64.90, 31.48, 28.71, 25.66, 22.57, 18.87, 14.03. HRMS (ESI-TOF)  $m/z$  Calcd for  $C_{19}H_{24}NO_2^+$   $[M+H]^+$  298.1807, found 298.1811. IR (film)  $\nu_{max}$  2951, 2924, 2854, 1703, 1633, 1473, 1338, 1312, 1282, 1237, 1173, 1153, 995, 886, 856, 811  $cm^{-1}$ .

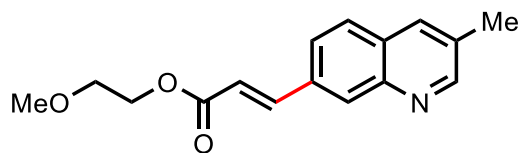

**2-Methoxyethyl (*E*)-3-(3-methylquinolin-7-yl)acrylate (3t)** The general procedure 2.5 was followed and purification by preparative TLC (DCM/EA = 2/1) furnished compound **3t** as a white solid (7.5 mg, 55%, C7:others = 95:5). TLC:  $R_f$  = 0.3 (hexane/EA = 3/1). mp: 81-83 °C.  $^1H$  NMR (600 MHz,  $CDCl_3$ )  $\delta$  8.79 (d,  $J$  = 2.2 Hz, 1H), 8.16 (s, 1H), 7.92 – 7.88 (m, 2H), 7.74 (d,  $J$  = 8.5 Hz, 1H), 7.69 (dd,  $J$  = 8.5, 1.8 Hz, 1H), 6.64 (d,  $J$  = 16.0 Hz, 1H), 4.42 – 4.39 (m, 2H), 3.71 – 3.68 (m, 2H), 3.44 (s, 3H), 2.53 (s, 3H).  $^{13}C$  NMR (151 MHz,  $CDCl_3$ )  $\delta$  166.82, 153.29, 146.54, 144.67, 134.51, 134.43, 131.72, 130.61, 129.16, 127.88, 124.52, 119.02, 70.59, 63.72, 59.09, 18.87. HRMS (ESI-TOF)  $m/z$  Calcd for  $C_{16}H_{18}NO_3^+$   $[M+H]^+$  272.1287, found 272.1294. IR (film)  $\nu_{max}$  2925, 1709, 1635, 1453, 1372, 1309, 1277, 1235, 1172, 1149, 1129, 1042, 983, 863, 814  $cm^{-1}$ .

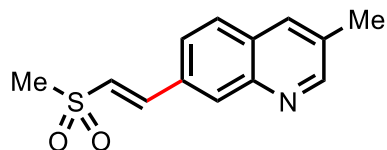

**(E)-3-Methyl-7-(2-(methylsulfonyl)vinyl)quinoline (3u)** The general procedure 2.5 was followed and purification by preparative TLC (EA/acetone = 10/1) furnished compound **3u** as a white solid (5.5 mg, 45%, C7:others > 99:1). TLC:  $R_f = 0.2$  (EA/acetone = 10/1). mp: 180-182 °C.  $^1\text{H}$  NMR (600 MHz,  $\text{CDCl}_3$ )  $\delta$  8.83 (d,  $J = 2.3$  Hz, 1H), 8.20 (s, 1H), 7.93 (s, 1H), 7.83 – 7.77 (m, 2H), 7.64 (dd,  $J = 8.4, 1.9$  Hz, 1H), 7.06 (d,  $J = 15.4$  Hz, 1H), 3.08 (s, 3H), 2.55 (s, 3H).  $^{13}\text{C}$  NMR (151 MHz,  $\text{CDCl}_3$ )  $\delta$  153.67, 146.34, 143.64, 134.45, 132.44, 132.08, 131.44, 129.67, 128.30, 127.24, 124.56, 43.33, 18.92. HRMS (ESI-TOF)  $m/z$  Calcd for  $\text{C}_{13}\text{H}_{14}\text{NO}_2\text{S}^+$   $[\text{M}+\text{H}]^+$  248.0745, found 248.0750. IR (film)  $\nu_{\text{max}}$  2925, 1278, 1127, 990, 971, 890, 800, 763, 750  $\text{cm}^{-1}$ .

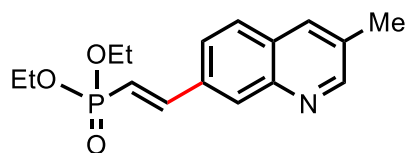

**Diethyl (E)-2-(3-methylquinolin-7-yl)vinylphosphonate (3v)** The general procedure 2.5 was followed and purification by preparative TLC (EA/acetone = 1/1) furnished compound **3v** as a white solid (10.0 mg, 66%, C7:others > 99:1). TLC:  $R_f = 0.2$  (EA/acetone = 1/1). mp: 88-90 °C.  $^1\text{H}$  NMR (600 MHz,  $\text{CDCl}_3$ )  $\delta$  8.80 (d,  $J = 2.2$  Hz, 1H), 8.14 (s, 1H), 7.91 (s, 1H), 7.75 (d,  $J = 8.5$  Hz, 1H), 7.72 – 7.65 (m, 2H), 6.42 (t,  $J = 17.3$  Hz, 1H), 4.20 – 4.14 (m, 4H), 2.54 (s, 3H), 1.38 (t,  $J = 7.0$  Hz, 6H).  $^{13}\text{C}$  NMR (151 MHz,  $\text{CDCl}_3$ )  $\delta$  153.32, 148.14 (d,  $J = 7.1$  Hz), 146.51 (d,  $J = 1.7$  Hz), 134.95 (d,  $J = 23.3$  Hz), 134.43, 131.69, 129.94, 129.08, 127.83, 124.36, 115.47 (d,  $J = 191.0$  Hz), 62.01, 61.97, 18.87, 16.47, 16.42. HRMS (ESI-TOF)  $m/z$  Calcd for  $\text{C}_{16}\text{H}_{21}\text{NO}_3\text{P}^+$   $[\text{M}+\text{H}]^+$  306.1259, found 306.1258. IR (film)  $\nu_{\text{max}}$  2982, 2927, 1617, 1454, 1391, 1235, 1049, 1023, 963, 857, 806  $\text{cm}^{-1}$ .

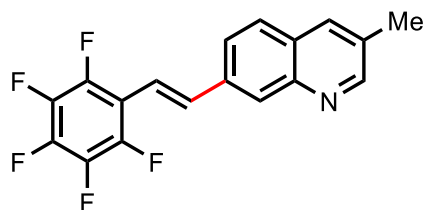

**(E)-3-methyl-7-(2-(perfluorophenyl)vinyl)quinoline (3w)** The general procedure 2.5 was followed and purification by preparative TLC (DCM/EA = 10/1) furnished compound **3w** as a white solid (11.7 mg, 70%, C7:others = 96:4). TLC:  $R_f = 0.3$  (hexane/EA = 20/1). mp: 85-87 °C.  $^1\text{H}$  NMR (600 MHz,  $\text{CDCl}_3$ )  $\delta$  8.79 (d,  $J = 2.2$  Hz, 1H), 8.14 (s, 1H), 7.91 (s, 1H), 7.77 – 7.73 (m, 2H), 7.62 (d,  $J = 16.7$  Hz, 1H), 7.16 (d,  $J = 16.7$  Hz, 1H), 2.53 (s, 3H).  $^{13}\text{C}$  NMR (151 MHz,  $\text{CDCl}_3$ )  $\delta$  153.17, 146.72, 144.93 (dm,  $J = 247.0$  Hz), 139.94 (dm,  $J = 254.8$  Hz), 137.83 (dm,  $J = 250.3$  Hz), 136.81 – 136.65 (m), 136.66, 134.48, 131.15, 128.43, 127.76, 127.38, 124.20, 114.06 (d,  $J = 3.5$  Hz), 112.27 (td,  $J = 13.7, 4.2$  Hz), 18.85.  $^{19}\text{F}$  NMR (376 MHz,  $\text{CDCl}_3$ )  $\delta$  -145.02 (dd,  $J = 22.1, 8.3$  Hz, 2F), -158.61 (t,  $J = 21.5$  Hz, 1F), -165.39 (td,  $J = 21.8, 7.9$  Hz, 2F). HRMS (ESI-TOF)  $m/z$  Calcd for  $\text{C}_{18}\text{H}_{11}\text{F}_5\text{N}^+$   $[\text{M}+\text{H}]^+$  336.0812, found 336.0815. IR (film)  $\nu_{\text{max}}$  2924, 2852, 1520, 1493, 1276, 1261, 1002, 965, 902, 750  $\text{cm}^{-1}$ .

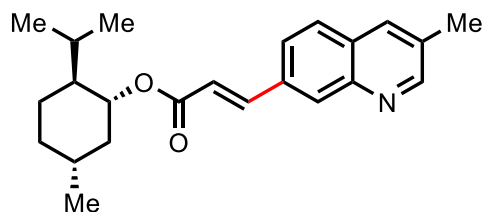

**(1R,2S,5R)-2-Isopropyl-5-methylcyclohexyl (E)-3-(3-methylquinolin-7-yl)acrylate (3x)** The general procedure 2.5 was followed and purification by preparative TLC (DCM/EA = 10/1) furnished compound **3x** as a white solid (10.5 mg, 60%, C7:others = 95:5). TLC:  $R_f = 0.3$  (hexane/EA = 20/1). mp: 135-137 °C.  $^1\text{H}$  NMR (600 MHz,  $\text{CDCl}_3$ )  $\delta$  8.79 (d,  $J = 2.2$  Hz, 1H), 8.16 (s, 1H), 7.90 (s, 1H), 7.85 (d,  $J = 16.0$  Hz, 1H), 7.74 (d,  $J = 8.5$  Hz, 1H), 7.70 (dd,  $J = 8.5, 1.7$  Hz, 1H), 6.58 (d,  $J = 16.0$  Hz, 1H), 4.88 – 4.83 (m, 1H), 2.53 (d,  $J = 1.0$  Hz, 3H), 2.11 – 2.07 (m, 1H), 1.95 (ddd,  $J = 11.3, 7.0, 3.5$  Hz, 1H), 1.72 (dt,  $J = 14.4, 2.9$  Hz, 2H), 1.56 – 1.53 (m, 1H), 1.50 – 1.47 (m, 1H), 1.10 (dd,  $J = 23.4, 11.3$  Hz, 2H), 0.93 (dd,  $J = 6.8, 3.6$  Hz, 7H), 0.81 (d,  $J = 6.9$  Hz, 3H).  $^{13}\text{C}$  NMR (151 MHz,  $\text{CDCl}_3$ )  $\delta$  166.44, 153.24, 146.56, 143.88, 134.71, 134.43, 131.62, 130.43, 129.06, 127.80, 124.55, 119.97, 74.47, 47.22, 41.04, 34.32, 31.46, 26.41, 23.59, 22.06, 20.78, 18.87, 16.49. HRMS (ESI-TOF)  $m/z$  Calcd for  $\text{C}_{23}\text{H}_{30}\text{NO}_2^+$   $[\text{M}+\text{H}]^+$  352.2277, found 352.2281.  $[\alpha]_D^{21} = -63.7$  ( $c$  0.1,  $\text{CHCl}_3$ ). IR (film)  $\nu_{\text{max}}$  2954, 2868, 1701, 1632, 1458, 1308, 1276, 1262, 1176, 993, 812, 751  $\text{cm}^{-1}$ .

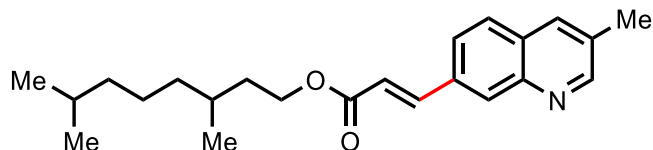

**3,7-Dimethyloctyl (*E*)-3-(3-methylquinolin-7-yl)acrylate (3y)** The general procedure 2.5 was followed and purification by preparative TLC (DCM) furnished compound **3y** as a white solid (11.5 mg, 65%, C7:others = 95:5). TLC:  $R_f = 0.3$  (hexane/EA = 20/1). mp: 53-55 °C.  $^1\text{H}$  NMR (600 MHz,  $\text{CDCl}_3$ )  $\delta$  8.79 (d,  $J = 2.2$  Hz, 1H), 8.16 (s, 1H), 7.90 (s, 1H), 7.86 (d,  $J = 16.0$  Hz, 1H), 7.74 (d,  $J = 8.5$  Hz, 1H), 7.70 (dd,  $J = 8.5, 1.7$  Hz, 1H), 6.59 (d,  $J = 16.0$  Hz, 1H), 4.31 – 4.22 (m, 2H), 2.53 (s, 3H), 1.80 – 1.74 (m, 1H), 1.62 (dd,  $J = 12.3, 6.9$  Hz, 1H), 1.56 – 1.49 (m, 2H), 1.33 (ddt,  $J = 9.4, 5.1, 2.8$  Hz, 2H), 1.29 – 1.25 (m, 1H), 1.20 – 1.14 (m, 3H), 0.95 (d,  $J = 6.6$  Hz, 3H), 0.87 (dd,  $J = 6.6, 1.2$  Hz, 6H).  $^{13}\text{C}$  NMR (151 MHz,  $\text{CDCl}_3$ )  $\delta$  166.96, 153.27, 146.55, 144.06, 134.63, 134.43, 131.66, 130.43, 129.10, 127.83, 124.57, 119.55, 63.35, 39.23, 37.18, 35.64, 29.94, 27.97, 24.65, 22.71, 22.62, 19.59, 18.87. HRMS (ESI-TOF)  $m/z$  Calcd for  $\text{C}_{23}\text{H}_{32}\text{NO}_2^+$   $[\text{M}+\text{H}]^+$  354.2433, found 354.2430. IR (film)  $\nu_{\text{max}}$  2954, 2926, 1710, 1636, 1458, 1381, 1308, 1291, 1234, 1170, 1148, 983, 814  $\text{cm}^{-1}$ .

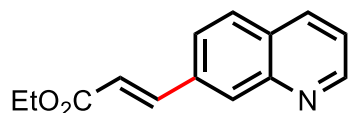

**Ethyl (*E*)-3-(quinolin-7-yl)acrylate (3z)** The general procedure 2.5 was followed and purification by preparative TLC (DCM/EA = 5/1) furnished compound **3z** as a white solid (6.0 mg, 53%, C7:C3 = 90:10). TLC:  $R_f = 0.3$  (hexane/EA = 10/1). mp: 55-57 °C.  $^1\text{H}$  NMR (600 MHz,  $\text{CDCl}_3$ )  $\delta$  8.95 (dd,  $J = 4.2, 1.7$  Hz, 1H), 8.20 (s, 1H), 8.15 (d,  $J = 7.4$  Hz, 1H), 7.88 (d,  $J = 16.0$  Hz, 1H), 7.83 (d,  $J = 8.5$  Hz, 1H), 7.74 (dd,  $J = 8.5, 1.7$  Hz, 1H), 7.43 (dd,  $J = 8.2, 4.2$  Hz, 1H), 6.62 (d,  $J = 16.0$  Hz, 1H), 4.31 (q,  $J = 7.2$  Hz, 2H), 1.37 (t,  $J = 7.2$  Hz, 3H).  $^{13}\text{C}$  NMR (151 MHz,  $\text{CDCl}_3$ )  $\delta$  166.75, 151.27, 148.35, 143.88, 135.76, 135.59, 130.59, 129.20, 128.50, 124.54, 121.93, 120.10, 60.73, 14.35. HRMS (ESI-TOF)  $m/z$  Calcd for  $\text{C}_{14}\text{H}_{14}\text{NO}_2^+$   $[\text{M}+\text{H}]^+$  228.1025, found 228.1026. IR (film)  $\nu_{\text{max}}$  2982, 1709, 1637, 1503, 1448, 1368, 1307, 1265, 1176, 1036, 985, 836, 764  $\text{cm}^{-1}$ .

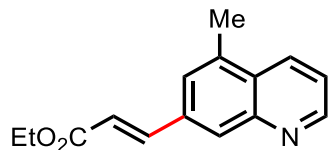

**Ethyl (*E*)-3-(5-methylquinolin-7-yl)acrylate (3aa)** The general procedure 2.5 was followed and purification by preparative TLC (DCM/EA = 10/1) furnished compound **3aa** as a white solid (6.3 mg, 52%, C7:C3 = 90:10). TLC:  $R_f = 0.3$  (hexane/EA = 20/1). mp: 98-100 °C.  $^1\text{H}$  NMR (600 MHz,  $\text{CDCl}_3$ )  $\delta$  8.94 (dd,  $J = 4.2, 1.6$  Hz, 1H), 8.31 (d,  $J = 8.5$  Hz, 1H), 8.06 (s, 1H), 7.84 (d,  $J = 16.0$  Hz, 1H), 7.57 (s, 1H), 7.45 (dd,  $J = 8.5, 4.1$  Hz, 1H), 6.60 (d,  $J = 16.0$  Hz, 1H), 4.30 (q,  $J = 7.1$  Hz, 2H), 2.71 (s, 3H), 1.37 (t,  $J = 7.1$  Hz, 3H).  $^{13}\text{C}$  NMR (151 MHz,  $\text{CDCl}_3$ )  $\delta$  166.83, 150.79, 148.65, 144.04, 135.41, 135.09, 132.32, 129.07, 128.72, 124.80, 121.56, 119.81, 60.68, 18.77, 14.35. HRMS (ESI-TOF)  $m/z$  Calcd for  $\text{C}_{15}\text{H}_{16}\text{NO}_2^+$   $[\text{M}+\text{H}]^+$  242.1181, found 242.1187. IR (film)  $\nu_{\text{max}}$  2975, 1701, 1628, 1446, 1368, 1288, 1241, 1182, 1039, 997, 876  $\text{cm}^{-1}$ .

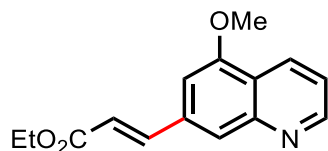

**Ethyl (*E*)-3-(5-methoxyquinolin-7-yl)acrylate (3ab)** The general procedure 2.5 was followed and purification by preparative TLC (hexane/EA = 5/1) furnished compound **3ab** as a white solid (7.2 mg, 56%, C7:C3 = 88:12). TLC:  $R_f = 0.3$  (hexane/EA = 10/1). mp: 124-126 °C.  $^1\text{H}$  NMR (600 MHz,  $\text{CDCl}_3$ )  $\delta$  8.92 (dd,  $J = 4.2, 1.8$  Hz, 1H), 8.54 (ddd,  $J = 8.4, 1.7, 0.8$  Hz, 1H), 7.86 – 7.80 (m, 2H), 7.40 (dd,  $J = 8.4, 4.2$  Hz, 1H), 7.00 (d,  $J = 1.4$  Hz, 1H), 6.58 (d,  $J = 16.0$  Hz, 1H), 4.31 (q,  $J = 7.1$  Hz, 2H), 4.05 (s, 3H), 1.37 (t,  $J = 7.1$  Hz, 3H).  $^{13}\text{C}$  NMR (151 MHz,  $\text{CDCl}_3$ )  $\delta$  166.77, 155.55, 151.48, 149.06, 144.49, 135.52, 130.73, 123.79, 122.16, 121.13, 119.62, 101.46, 60.72, 55.83, 14.36. HRMS (ESI-TOF)  $m/z$  Calcd for  $\text{C}_{15}\text{H}_{16}\text{NO}_3^+$   $[\text{M}+\text{H}]^+$  258.1130, found 258.1142. IR (film)  $\nu_{\text{max}}$  2924, 1699, 1613, 1589, 1450, 1397, 1373, 1282, 1241, 1148, 1105, 1043, 994, 862  $\text{cm}^{-1}$ .

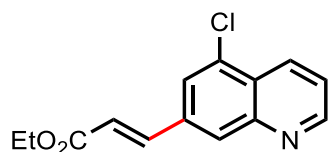



**Ethyl (*E*)-3-(5-chloroquinolin-7-yl)acrylate (3ac)** The general procedure 2.5 was followed and purification by preparative TLC (hexane/EA = 5/1) furnished compound **3ac** as a white solid (5.9 mg, 45%, C7:C3 = 90:10). TLC:  $R_f = 0.3$  (hexane/EA = 10/1). mp: 100-102 °C.  $^1\text{H}$  NMR (600 MHz,  $\text{CDCl}_3$ )  $\delta$  8.99 (dd,  $J = 4.2, 1.7$  Hz, 1H), 8.56 (ddd,  $J = 8.5, 1.7, 0.9$  Hz, 1H), 8.13 (s, 1H), 7.84 – 7.77 (m, 2H), 7.54 (dd,  $J = 8.5, 4.2$  Hz, 1H), 6.60 (d,  $J = 16.0$  Hz, 1H), 4.31 (q,  $J = 7.2$  Hz, 2H), 1.37 (t,  $J = 7.2$  Hz, 3H).  $^{13}\text{C}$  NMR (151 MHz,  $\text{CDCl}_3$ )  $\delta$  166.41, 151.83, 148.89, 142.55, 135.61, 132.79, 132.29, 129.66, 127.19, 124.45, 122.65, 120.99, 60.86, 14.32. HRMS (ESI-TOF)  $m/z$  Calcd for  $\text{C}_{14}\text{H}_{13}\text{ClNO}_2^+$   $[\text{M}+\text{H}]^+$  262.0635, found 262.0651. IR (film)  $\nu_{\text{max}}$  2926, 1711, 1557, 1445, 1365, 1290, 1242, 1177, 1052, 980, 934, 867, 805  $\text{cm}^{-1}$ .

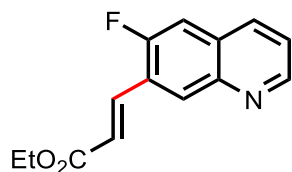

**Ethyl (*E*)-3-(6-fluoroquinolin-7-yl)acrylate (3ad)** The general procedure 2.5 was followed and purification by preparative TLC (DCM/EA = 10/1) furnished compound **3ad** as a white solid (4.7 mg, 38%, C7:C3 = 88:12). TLC:  $R_f = 0.3$  (hexane/EA = 20/1). mp: 58-60 °C.  $^1\text{H}$  NMR (600 MHz,  $\text{CDCl}_3$ )  $\delta$  8.91 (d,  $J = 3.0$  Hz, 1H), 8.30 (d,  $J = 7.1$  Hz, 1H), 8.10 (d,  $J = 8.2$  Hz, 1H), 7.93 (d,  $J = 16.2$  Hz, 1H), 7.48 (d,  $J = 10.8$  Hz, 1H), 7.43 (dd,  $J = 8.3, 4.2$  Hz, 1H), 6.76 (d,  $J = 16.2$  Hz, 1H), 4.31 (q,  $J = 7.1$  Hz, 2H), 1.37 (t,  $J = 7.2$  Hz, 3H).  $^{13}\text{C}$  NMR (151 MHz,  $\text{CDCl}_3$ )  $\delta$  166.60, 158.80 (d,  $J = 254.9$  Hz), 150.59 (d,  $J = 2.9$  Hz), 145.13, 137.09 (d,  $J = 2.6$  Hz), 135.01 (d,  $J = 5.5$  Hz), 131.40 (d,  $J = 4.9$  Hz), 129.58 (d,  $J = 10.6$  Hz), 126.59 (d,  $J = 16.0$  Hz), 123.04 (d,  $J = 7.1$  Hz), 122.47, 111.71 (d,  $J = 23.0$  Hz), 60.85, 14.32.  $^{19}\text{F}$  NMR (376 MHz,  $\text{CDCl}_3$ )  $\delta$  -119.18. HRMS (ESI-TOF)  $m/z$  Calcd for  $\text{C}_{14}\text{H}_{13}\text{FNO}_2^+$   $[\text{M}+\text{H}]^+$  246.0930, found 246.0935. IR (film)  $\nu_{\text{max}}$  2927, 1711, 1631, 1500, 1458, 1369, 1283, 1226, 1179, 1162, 1108, 1037, 982, 862  $\text{cm}^{-1}$ .

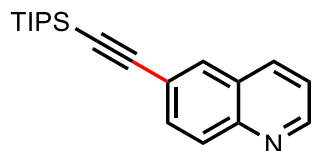

**6-((Triisopropylsilyl)ethynyl)quinoline (4a)** The general procedure 2.6 was followed and purification by preparative TLC (hexane/EA = 3/1) furnished compound **4a** as colorless oil (20.4 mg, 66%, C6:others = 96:4). TLC:  $R_f = 0.3$  (hexane/EA = 5/1).  $^1\text{H}$  NMR (600 MHz,  $\text{CDCl}_3$ )  $\delta$  8.90 (dd,  $J = 4.2, 1.7$  Hz, 1H), 8.10 (dd,  $J = 8.4, 1.7$  Hz, 1H), 8.03 (d,  $J = 8.7$  Hz, 1H), 7.96 (d,  $J = 1.9$  Hz, 1H), 7.76 (dd,  $J = 8.7, 1.8$  Hz, 1H), 7.41 (dd,  $J = 8.3, 4.2$  Hz, 1H), 1.16 (m, 21H).  $^{13}\text{C}$  NMR (151 MHz,  $\text{CDCl}_3$ )  $\delta$  150.92, 147.70, 135.70, 132.60, 131.53, 129.45, 127.92, 121.84, 121.71, 106.52, 92.32, 18.70, 11.33. HRMS (ESI-TOF)  $m/z$  Calcd for  $\text{C}_{20}\text{H}_{28}\text{NSi}^+$   $[\text{M}+\text{H}]^+$  310.1991, found 310.1994. IR (film)  $\nu_{\text{max}}$  2942, 2864, 2153, 1592, 1492, 1462, 1370, 1320, 1213, 1072, 995, 907, 883, 838, 795, 758, 675, 660  $\text{cm}^{-1}$ .

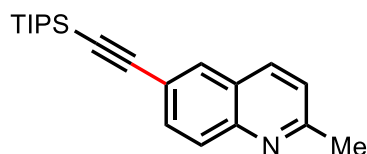

**2-Methyl-6-((triisopropylsilyl)ethynyl)quinoline (4b)** The general procedure 2.6 was followed and purification by preparative TLC (hexane/EA = 3/1) furnished compound **4b** as a pale yellow solid (16.1 mg, 50%, C6:others = 98:2). TLC:  $R_f = 0.3$  (hexane/EA = 5/1). mp: 86-88 °C.  $^1\text{H}$  NMR (600 MHz,  $\text{CDCl}_3$ )  $\delta$  7.99 (d,  $J = 8.4$  Hz, 1H), 7.94 – 7.90 (m, 2H), 7.72 (dd,  $J = 8.6, 1.9$  Hz, 1H), 7.29 (d,  $J = 8.4$  Hz, 1H), 2.74 (s, 3H), 1.16 (m, 21H).  $^{13}\text{C}$  NMR (151 MHz,  $\text{CDCl}_3$ )  $\delta$  159.76, 147.32, 135.80, 132.63, 131.30, 128.62, 126.11, 122.65, 120.88, 106.72, 91.67, 25.45, 18.70, 11.34. HRMS (ESI-TOF)  $m/z$  Calcd for  $\text{C}_{21}\text{H}_{30}\text{NSi}^+$   $[\text{M}+\text{H}]^+$  324.2148, found 324.2154. IR (film)  $\nu_{\text{max}}$  2941, 2864, 2154, 1597, 1491, 1463, 1386, 1276, 1220, 1073, 995, 923, 884, 838, 762, 699, 675, 631  $\text{cm}^{-1}$ .

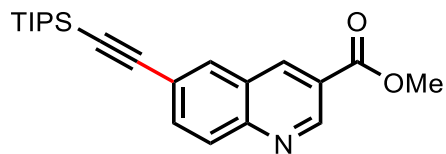

**Methyl 6-((triisopropylsilyl)ethynyl)quinoline-3-carboxylate (4c)** The general procedure 2.6 was followed and purification by preparative TLC (hexane/EA = 3/1) furnished compound **4c** as a pale yellow solid (17.2 mg, 47%, C6:others > 99:1). TLC:  $R_f = 0.3$  (hexane/EA = 5/1). mp: 63-65 °C.  $^1\text{H}$  NMR (600 MHz,  $\text{CDCl}_3$ )  $\delta$  9.42 (d,  $J = 2.1$  Hz, 1H), 8.79 (d,  $J = 1.7$  Hz, 1H), 8.08 (d,

$J = 8.7$  Hz, 1H), 8.06 (d,  $J = 1.8$  Hz, 1H), 7.86 (dd,  $J = 8.7, 1.8$  Hz, 1H), 4.02 (s, 3H), 1.16 (m, 21H).  $^{13}\text{C}$  NMR (151 MHz,  $\text{CDCl}_3$ )  $\delta$  165.63, 150.47, 149.18, 138.33, 134.90, 132.58, 129.46, 126.59, 123.62, 122.88, 105.87, 93.52, 52.59, 18.68, 11.31. HRMS (ESI-TOF)  $m/z$  Calcd for  $\text{C}_{22}\text{H}_{30}\text{NO}_2\text{Si}^+$   $[\text{M}+\text{H}]^+$  368.2046, found 368.2043. IR (film)  $\nu_{\text{max}}$  2943, 2865, 2154, 1727, 1600, 1494, 1462, 1441, 1337, 1278, 1237, 1104, 995, 936, 882, 841, 767, 677, 661  $\text{cm}^{-1}$ .

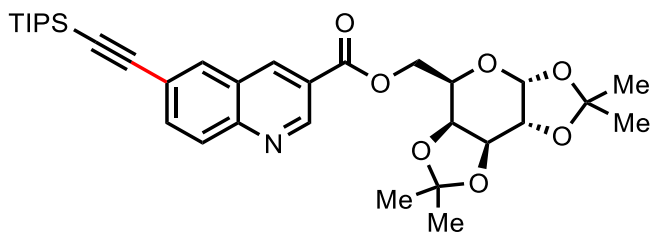

**((3aR,5R,5aS,8aS,8bR)-2,2,7,7-tetramethyltetrahydro-5H-bis([1,3]dioxolo)[4,5-b:4',5'-d]pyran-5-yl)methyl 6-((triisopropylsilyl)ethynyl)quinoline-3-carboxylate (4d)** The general procedure 2.6 was followed and purification by preparative TLC (hexane/EA = 3/1) furnished compound **4d** as pale yellow oil (32.7 mg, 55%, C6:others > 99:1). TLC:  $R_f = 0.3$  (hexane/EA = 5/1).  $^1\text{H}$  NMR (600 MHz,  $\text{CDCl}_3$ )  $\delta$  9.43 (d,  $J = 2.1$  Hz, 1H), 8.79 (d,  $J = 1.9$  Hz, 1H), 8.09 – 8.05 (m, 2H), 7.86 (dd,  $J = 8.7, 1.8$  Hz, 1H), 5.58 (d,  $J = 4.9$  Hz, 1H), 4.68 (dd,  $J = 7.8, 2.5$  Hz, 1H), 4.61 (dd,  $J = 11.5, 4.7$  Hz, 1H), 4.55 (dd,  $J = 11.5, 7.7$  Hz, 1H), 4.38 – 4.35 (m, 2H), 4.24 (ddd,  $J = 7.0, 4.7, 1.9$  Hz, 1H), 1.53 (s, 3H), 1.50 (s, 3H), 1.37 (s, 3H), 1.34 (s, 3H), 1.17 (m, 21H).  $^{13}\text{C}$  NMR (151 MHz,  $\text{CDCl}_3$ )  $\delta$  165.01, 150.55, 149.21, 138.44, 134.93, 132.62, 129.45, 126.57, 123.56, 122.86, 109.82, 108.88, 105.88, 96.34, 93.51, 71.14, 70.78, 70.51, 66.09, 64.52, 29.71, 26.07, 26.00, 24.97, 24.51, 18.69, 11.31. HRMS (ESI-TOF)  $m/z$  Calcd for  $\text{C}_{33}\text{H}_{46}\text{NO}_7\text{Si}^+$   $[\text{M}+\text{H}]^+$  596.3044, found 596.3060.  $[\alpha]_D^{21} = -30.0$  ( $c$  0.1,  $\text{CHCl}_3$ ). IR (film)  $\nu_{\text{max}}$  2941, 2865, 1726, 1600, 1495, 1462, 1380, 1277, 1256, 1237, 1214, 1168, 1104, 1071, 1005, 885, 842, 763, 678  $\text{cm}^{-1}$ .

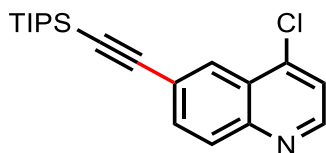

**4-Chloro-6-((triisopropylsilyl)ethynyl)quinoline (4e)** The general procedure 2.6 was followed and purification by preparative TLC (hexane/EA = 3/1) furnished compound **4e** as colorless oil

(13.0 mg, 38%, C6:others = 98:2). TLC:  $R_f = 0.3$  (hexane/EA = 5/1).  $^1\text{H}$  NMR (600 MHz,  $\text{CDCl}_3$ )  $\delta$  8.76 (d,  $J = 4.7$  Hz, 1H), 8.33 (d,  $J = 1.8$  Hz, 1H), 8.04 (d,  $J = 8.7$  Hz, 1H), 7.80 (dd,  $J = 8.7, 1.8$  Hz, 1H), 7.50 (d,  $J = 4.7$  Hz, 1H), 1.17 (m, 21H).  $^{13}\text{C}$  NMR (151 MHz,  $\text{CDCl}_3$ )  $\delta$  150.30, 148.49, 142.24, 133.61, 129.85, 127.72, 126.32, 123.03, 121.85, 106.19, 93.55, 18.69, 11.32. HRMS (ESI-TOF)  $m/z$  Calcd for  $\text{C}_{20}\text{H}_{27}\text{ClNSi}^+ [\text{M}+\text{H}]^+$  344.1601, found 344.1609. IR (film)  $\nu_{\text{max}}$  2942, 2865, 2149, 1579, 1548, 1490, 1463, 1350, 1223, 1161, 992, 911, 884, 846, 678, 659  $\text{cm}^{-1}$ .

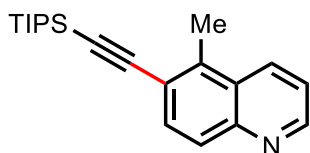

**5-Methyl-6-((triisopropylsilyl)ethynyl)quinoline (4f)** The general procedure 2.6 was followed and purification by preparative TLC (hexane/EA = 15/1) furnished compound **4f** as a white solid (14.8 mg, 46%, C6:others > 99:1). TLC:  $R_f = 0.3$  (hexane/EA = 30/1). mp: 46-48 °C.  $^1\text{H}$  NMR (600 MHz,  $\text{CDCl}_3$ )  $\delta$  8.82 (dd,  $J = 4.1, 1.6$  Hz, 1H), 8.29 (ddd,  $J = 8.6, 1.7, 0.9$  Hz, 1H), 7.81 (d,  $J = 8.8$  Hz, 1H), 7.67 (d,  $J = 8.7$  Hz, 1H), 7.37 (dd,  $J = 8.5, 4.2$  Hz, 1H), 2.78 (s, 3H), 1.10 (d,  $J = 2.9$  Hz, 21H).  $^{13}\text{C}$  NMR (151 MHz,  $\text{CDCl}_3$ )  $\delta$  150.29, 148.00, 137.84, 132.77, 132.72, 127.48, 127.38, 121.26, 121.24, 106.05, 96.31, 18.73, 16.57, 11.36. HRMS (ESI-TOF)  $m/z$  Calcd for  $\text{C}_{21}\text{H}_{30}\text{NSi}^+ [\text{M}+\text{H}]^+$  324.2148, found 324.2160. IR (film)  $\nu_{\text{max}}$  2940, 2864, 2160, 1565, 1493, 1462, 1382, 1261, 1070, 995, 883, 836, 805, 764, 676, 659  $\text{cm}^{-1}$ .

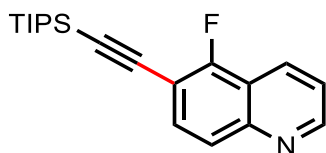

**5-Fluoro-6-((triisopropylsilyl)ethynyl)quinoline (4g)** The general procedure 2.6 was followed and purification by preparative TLC (hexane/EA = 15/1) furnished compound **4g** as colorless oil (12.8 mg, 39%, C6:others > 99:1). TLC:  $R_f = 0.3$  (hexane/EA = 30/1).  $^1\text{H}$  NMR (600 MHz,  $\text{CDCl}_3$ )  $\delta$  8.87 (dd,  $J = 4.2, 1.7$  Hz, 1H), 8.34 (ddd,  $J = 8.4, 1.8, 0.9$  Hz, 1H), 7.77 (d,  $J = 8.8$  Hz, 1H), 7.63 (dd,  $J = 8.8, 7.4$  Hz, 1H), 7.40 (dd,  $J = 8.5, 4.2$  Hz, 1H), 1.10 (d,  $J = 3.4$  Hz, 16H).  $^{13}\text{C}$  NMR (151 MHz,  $\text{CDCl}_3$ )  $\delta$  158.97 (d,  $J = 261.6$  Hz), 151.56, 148.44 (d,  $J = 3.3$  Hz), 132.35,

129.19 (d,  $J = 4.5$  Hz), 125.05 (d,  $J = 4.4$  Hz), 121.70, 118.90 (d,  $J = 15.9$  Hz), 107.30 (d,  $J = 14.8$  Hz), 99.47, 98.75 (d,  $J = 4.8$  Hz), 18.65, 11.27.  $^{19}\text{F}$  NMR (376 MHz,  $\text{CDCl}_3$ )  $\delta$  -120.11. HRMS (ESI-TOF)  $m/z$  Calcd for  $\text{C}_{20}\text{H}_{27}\text{FNSi}^+$   $[\text{M}+\text{H}]^+$  328.1897, found 328.1906. IR (film)  $\nu_{\text{max}}$  2942, 2865, 1971, 1592, 1564, 1489, 1466, 1384, 1232, 1170, 1070, 996, 957, 883, 833, 809, 702, 673, 660  $\text{cm}^{-1}$ .

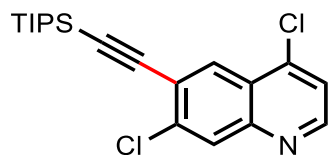

**4,7-Dichloro-6-((triisopropylsilyl)ethynyl)quinoline (4h)** The general procedure 2.6 was followed and purification by preparative TLC (hexane/EA = 3/1) furnished compound **4h** as a pale yellow solid (23.4 mg, 62%, C6:others > 99:1). TLC:  $R_f = 0.3$  (hexane/EA = 5/1). mp: 65-67  $^{\circ}\text{C}$ .  $^1\text{H}$  NMR (600 MHz,  $\text{CDCl}_3$ )  $\delta$  8.76 (d,  $J = 4.7$  Hz, 1H), 8.37 (s, 1H), 8.17 (s, 1H), 7.48 (d,  $J = 4.7$  Hz, 1H), 1.18 (m, 21H).  $^{13}\text{C}$  NMR (151 MHz,  $\text{CDCl}_3$ )  $\delta$  151.34, 148.47, 142.08, 137.78, 129.46, 124.95, 123.38, 121.87, 102.32, 99.28, 18.68, 11.31. HRMS (ESI-TOF)  $m/z$  Calcd for  $\text{C}_{20}\text{H}_{26}\text{Cl}_2\text{NSi}^+$   $[\text{M}+\text{H}]^+$  378.1212, found 378.1212. IR (film)  $\nu_{\text{max}}$  2942, 2865, 2153, 1606, 1578, 1543, 1465, 1423, 1327, 1220, 1063, 1025, 996, 886, 846, 778, 679, 662  $\text{cm}^{-1}$ .

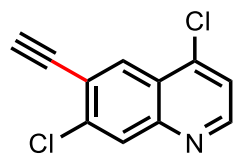

**4,7-Dichloro-6-ethynylquinoline (4h')** Treating **4h** with TBAF (2 equiv) in THF for 5 min furnished compound **4h'** (white solid, 96%). TLC:  $R_f = 0.3$  (hexane/EA = 5/1). mp: 173-175  $^{\circ}\text{C}$ .  $^1\text{H}$  NMR (600 MHz,  $\text{CDCl}_3$ )  $\delta$  8.72 (d,  $J = 4.7$  Hz, 1H), 8.38 (s, 1H), 8.12 (s, 1H), 7.44 (d,  $J = 4.7$  Hz, 1H), 3.44 (s, 1H).  $^{13}\text{C}$  NMR (151 MHz,  $\text{CDCl}_3$ )  $\delta$  151.75, 148.73, 142.23, 137.36, 130.34, 129.67, 124.94, 122.06, 122.01, 83.87, 79.65. HRMS (ESI-TOF)  $m/z$  Calcd for  $\text{C}_{11}\text{H}_6\text{Cl}_2\text{N}^+$   $[\text{M}+\text{H}]^+$  221.9877, found 221.9885. IR (film)  $\nu_{\text{max}}$  3189, 2160, 2136, 1546, 1469, 1330, 1276, 1261, 1022, 891, 751, 622  $\text{cm}^{-1}$ .

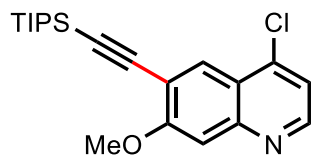

**4-Chloro-7-methoxy-6-((triisopropylsilyl)ethynyl)quinoline (4i)** The general procedure 2.6 was followed and purification by preparative TLC (hexane/EA = 2/1) furnished compound **4i** as a pale yellow solid (22.4 mg, 60%, C6:others > 99:1). TLC:  $R_f$  = 0.3 (hexane/EA = 3/1). mp: 92-94 °C.  $^1\text{H}$  NMR (600 MHz,  $\text{CDCl}_3$ )  $\delta$  8.66 (d,  $J$  = 4.8 Hz, 1H), 8.28 (s, 1H), 7.39 (s, 1H), 7.34 (d,  $J$  = 4.8 Hz, 1H), 4.00 (s, 3H), 1.18 (m, 21H).  $^{13}\text{C}$  NMR (151 MHz,  $\text{CDCl}_3$ )  $\delta$  161.13, 150.64, 150.33, 141.90, 129.43, 121.18, 119.70, 116.62, 107.28, 101.88, 98.02, 56.12, 18.68, 11.36. HRMS (ESI-TOF)  $m/z$  Calcd for  $\text{C}_{21}\text{H}_{29}\text{ClNOSi}^+$   $[\text{M}+\text{H}]^+$  374.1707, found 374.1719. IR (film)  $\nu_{\text{max}}$  2940, 2964, 2149, 1618, 1549, 1466, 1440, 1334, 1290, 1253, 1242, 1138, 1018, 997, 882, 853, 799, 741, 677  $\text{cm}^{-1}$ .

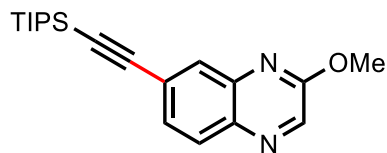

**2-Methoxy-7-((triisopropylsilyl)ethynyl)quinoxaline (4j)** The general procedure 2.6 was followed and purification by preparative TLC (hexane/EA = 20/1) furnished compound **4j** as colorless oil (8.5 mg, 25%, C7:others = 89:11). TLC:  $R_f$  = 0.3 (hexane/EA = 30/1).  $^1\text{H}$  NMR (600 MHz,  $\text{CDCl}_3$ )  $\delta$  8.43 (s, 1H), 7.98 (d,  $J$  = 1.7 Hz, 1H), 7.92 (d,  $J$  = 8.4 Hz, 1H), 7.61 (dd,  $J$  = 8.5, 1.8 Hz, 1H), 4.09 (s, 3H), 1.16 (m, 21H).  $^{13}\text{C}$  NMR (151 MHz,  $\text{CDCl}_3$ )  $\delta$  158.09, 140.14, 139.86, 138.58, 130.82, 129.82, 128.85, 125.38, 106.30, 93.50, 53.80, 18.68, 11.31. HRMS (ESI-TOF)  $m/z$  Calcd for  $\text{C}_{20}\text{H}_{29}\text{N}_2\text{OSi}^+$   $[\text{M}+\text{H}]^+$  341.2049, found 341.2049. IR (film)  $\nu_{\text{max}}$  2943, 2865, 2153, 1578, 1499, 1461, 1379, 1341, 1304, 1218, 1020, 987, 912, 884, 834, 751, 677  $\text{cm}^{-1}$ .

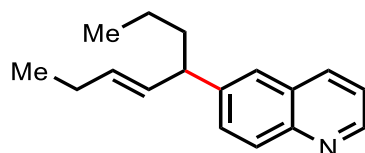

**(E)-6-(Oct-5-en-4-yl)quinoline (5a)** The general procedure 2.7 was followed and purification by preparative TLC (DCM/EA = 10/1) furnished compound **5a** as colorless oil (18.0 mg, 75%,

C6:others = 91:9). TLC:  $R_f = 0.3$  (hexane/EA = 20/1).  $^1\text{H}$  NMR (600 MHz,  $\text{CDCl}_3$ )  $\delta$  8.85 (dd,  $J = 4.2, 1.8$  Hz, 1H), 8.10 (dd,  $J = 8.7, 1.5$  Hz, 1H), 8.04 (d,  $J = 8.5$  Hz, 1H), 7.61 – 7.55 (m, 2H), 7.36 (dd,  $J = 8.3, 4.2$  Hz, 1H), 5.60 (dd,  $J = 15.3, 7.5$  Hz, 1H), 5.53 (dt,  $J = 15.3, 6.1$  Hz, 1H), 3.40 (q,  $J = 7.4$  Hz, 1H), 2.03 (p,  $J = 7.1$  Hz, 2H), 1.75 (q,  $J = 7.6$  Hz, 2H), 1.34 (dt,  $J = 15.0, 7.0$  Hz, 1H), 1.24 (dt,  $J = 13.7, 7.1$  Hz, 1H), 0.97 (t,  $J = 7.5$  Hz, 3H), 0.91 (t,  $J = 7.4$  Hz, 3H).  $^{13}\text{C}$  NMR (151 MHz,  $\text{CDCl}_3$ )  $\delta$  149.67, 147.27, 143.99, 135.72, 132.50, 132.40, 130.05, 129.35, 128.35, 125.32, 121.00, 48.46, 38.17, 25.62, 20.72, 14.02, 13.83. HRMS (ESI-TOF)  $m/z$  Calcd for  $\text{C}_{17}\text{H}_{22}\text{N}^+$   $[\text{M}+\text{H}]^+$  240.1752, found 240.1758. IR (film)  $\nu_{\text{max}}$  2960, 2931, 2871, 1678, 1623, 1593, 1501, 1460, 1377, 1172, 1123, 970, 884, 837, 801, 776  $\text{cm}^{-1}$ .

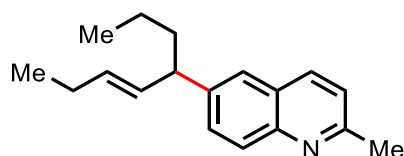

**(E)-2-Methyl-6-(oct-5-en-4-yl)quinoline (5b)** The general procedure 2.7 was followed and purification by preparative TLC (DCM/EA = 10/1) furnished compound **5b** as colorless oil (16.2 mg, 64%, C6:others = 84:16). TLC:  $R_f = 0.3$  (hexane/EA = 20/1).  $^1\text{H}$  NMR (600 MHz,  $\text{CDCl}_3$ )  $\delta$  7.99 (d,  $J = 8.3$  Hz, 1H), 7.94 (d,  $J = 8.6$  Hz, 1H), 7.55 – 7.51 (m, 2H), 7.25 (d,  $J = 8.3$  Hz, 1H), 5.59 (dd,  $J = 15.3, 7.5$  Hz, 1H), 5.52 (dt,  $J = 15.3, 6.1$  Hz, 1H), 3.37 (q,  $J = 7.5$  Hz, 1H), 2.72 (s, 3H), 2.02 (q,  $J = 7.1$  Hz, 2H), 1.75 – 1.71 (m, 2H), 1.33 (dd,  $J = 14.3, 7.1$  Hz, 1H), 1.23 (dd,  $J = 14.3, 7.1$  Hz, 1H), 0.97 (t,  $J = 7.5$  Hz, 3H), 0.90 (t,  $J = 7.4$  Hz, 3H).  $^{13}\text{C}$  NMR (151 MHz,  $\text{CDCl}_3$ )  $\delta$  158.13, 146.80, 143.01, 135.89, 132.65, 132.22, 129.94, 128.51, 126.50, 125.09, 121.88, 48.38, 38.22, 25.62, 25.27, 20.72, 14.03, 13.85. HRMS (ESI-TOF)  $m/z$  Calcd for  $\text{C}_{18}\text{H}_{24}\text{N}^+$   $[\text{M}+\text{H}]^+$  254.1909, found 254.1915. IR (film)  $\nu_{\text{max}}$  2958, 2929, 2870, 1675, 1601, 1497, 1459, 1377, 1310, 1224, 1174, 1122, 968, 890, 836, 814  $\text{cm}^{-1}$ .

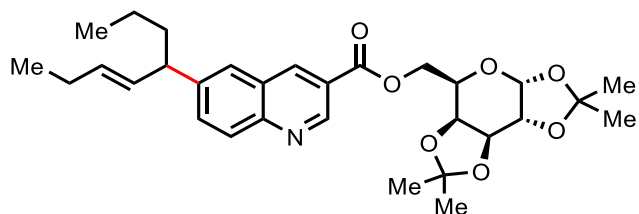

**((3a*R*,5*R*,5a*S*,8a*S*,8b*R*)-2,2,7,7-Tetramethyltetrahydro-5*H*-bis([1,3]dioxolo)[4,5-*b*:4',5'-*d*]pyran-5-yl)methyl 6-((*E*)-oct-5-en-4-yl)quinoline-3-carboxylate (**5c**)**

The general procedure 2.7 was followed and purification by preparative TLC (DCM/EA = 5/1) furnished compound **5c** as colorless oil (29.9 mg, 57%, C6:others = 90:10). TLC:  $R_f = 0.3$  (hexane/EA = 10/1).  $^1\text{H}$  NMR (600 MHz,  $\text{CDCl}_3$ )  $\delta$  9.40 (d,  $J = 2.2$  Hz, 1H), 8.81 (d,  $J = 2.1$  Hz, 1H), 8.08 (d,  $J = 8.5$  Hz, 1H), 7.72 – 7.67 (m, 2H), 5.61 – 5.52 (m, 3H), 4.68 (dd,  $J = 7.9, 2.5$  Hz, 1H), 4.62 (dd,  $J = 11.5, 4.6$  Hz, 1H), 4.53 (dd,  $J = 11.5, 7.7$  Hz, 1H), 4.38 – 4.36 (m, 2H), 4.25 (ddd,  $J = 6.9, 4.6, 1.9$  Hz, 1H), 3.43 (q,  $J = 7.3$  Hz, 1H), 2.07 – 2.01 (m, 2H), 1.76 (q,  $J = 7.6$  Hz, 2H), 1.53 (s, 3H), 1.50 (s, 3H), 1.37 (s, 3H), 1.34 (m, 4H), 1.26 – 1.23 (m, 1H), 0.98 (t,  $J = 7.4$  Hz, 3H), 0.92 (t,  $J = 7.4$  Hz, 3H).  $^{13}\text{C}$  NMR (151 MHz,  $\text{CDCl}_3$ )  $\delta$  165.41, 149.38, 148.89, 145.05, 138.59, 132.79, 132.62, 132.14, 129.33, 126.90, 126.64, 122.80, 109.80, 108.88, 96.35, 71.17, 70.78, 70.53, 66.16, 64.37, 48.34, 38.08, 26.07, 26.00, 25.61, 24.98, 24.51, 20.69, 14.00, 13.80. HRMS (ESI-TOF)  $m/z$  Calcd for  $\text{C}_{30}\text{H}_{40}\text{NO}_7^+$   $[\text{M}+\text{H}]^+$  526.2805, found 526.2806.  $[\alpha]_D^{21} = -83.2$  ( $c$  0.1,  $\text{CHCl}_3$ ). IR (film)  $\nu_{\text{max}}$  2963, 2932, 1723, 1602, 1501, 1453, 1379, 1281, 1238, 1213, 1168, 1104, 1070, 1004, 895, 763  $\text{cm}^{-1}$ .

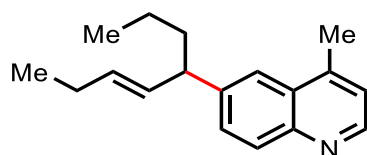

**(*E*)-4-Methyl-6-(oct-5-en-4-yl)quinoline (**5d**)** The general procedure 2.7 was followed and purification by preparative TLC (DCM/EA = 10/1) furnished compound **5d** as colorless oil (15.2 mg, 60%, C6:others = 91:9). TLC:  $R_f = 0.3$  (hexane/EA = 20/1).  $^1\text{H}$  NMR (600 MHz,  $\text{CDCl}_3$ )  $\delta$  8.71 (d,  $J = 4.4$  Hz, 1H), 8.03 (d,  $J = 8.6$  Hz, 1H), 7.73 (d,  $J = 2.0$  Hz, 1H), 7.57 (dd,  $J = 8.7, 2.0$  Hz, 1H), 7.20 (d,  $J = 4.0$  Hz, 1H), 5.61 (dd,  $J = 15.3, 7.5$  Hz, 1H), 5.54 (dt,  $J = 15.4, 6.1$  Hz, 1H), 3.42 (q,  $J = 7.5$  Hz, 1H), 2.70 (s, 3H), 2.04 (p,  $J = 7.1$  Hz, 2H), 1.77 – 1.73 (m, 2H), 1.37 – 1.31 (m, 1H), 1.26 – 1.21 (m, 1H), 0.98 (t,  $J = 7.5$  Hz, 3H), 0.92 (t,  $J = 7.4$  Hz, 3H).  $^{13}\text{C}$  NMR (151 MHz,  $\text{CDCl}_3$ )  $\delta$  149.41, 146.90, 143.84, 143.73, 132.65, 132.35, 129.95, 129.44, 128.26, 121.85, 121.52, 48.81, 38.32, 25.63, 20.77, 18.73, 14.04, 13.86. HRMS (ESI-TOF)  $m/z$  Calcd for  $\text{C}_{18}\text{H}_{24}\text{N}^+$   $[\text{M}+\text{H}]^+$  254.1909, found 254.1911. IR (film)  $\nu_{\text{max}}$  2960, 2931, 2872, 1681, 1592, 1504, 1461, 1364, 1242, 845  $\text{cm}^{-1}$ .



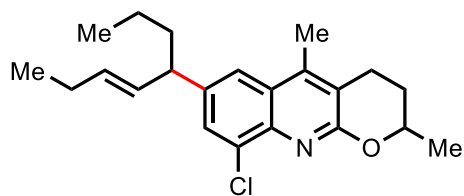

**(E)-9-Chloro-2,5-dimethyl-7-(oct-5-en-4-yl)-3,4-dihydro-2H-pyrano[2,3-b]quinoline (5e)**

The general procedure 2.7 was followed and purification by preparative TLC (hexane/DCM = 1/1) furnished compound **5e** as a white solid (10.3 mg, 29%,  $C_{\text{shown}}:\text{others} = 88:12$ ). TLC:  $R_f = 0.3$  (hexane/DCM = 2/1). mp: 121-123 °C.  $^1\text{H}$  NMR (600 MHz,  $\text{CDCl}_3$ )  $\delta$  7.56 (d,  $J = 5.4$  Hz, 2H), 5.58 – 5.49 (m, 2H), 4.41 – 4.36 (m, 1H), 3.31 (q,  $J = 7.2$  Hz, 1H), 3.01 – 2.97 (m, 1H), 2.87 (td,  $J = 11.6, 5.8$  Hz, 1H), 2.55 (s, 3H), 2.16 – 2.12 (m, 1H), 2.04 (p,  $J = 7.3$  Hz, 2H), 1.81 (dd,  $J = 12.0, 5.7$  Hz, 1H), 1.71 (dd,  $J = 11.5, 4.8$  Hz, 2H), 1.53 (d,  $J = 6.3$  Hz, 3H), 1.33 (t,  $J = 7.2$  Hz, 1H), 1.25 – 1.21 (m, 1H), 0.98 (t,  $J = 7.4$  Hz, 3H), 0.91 (t,  $J = 7.4$  Hz, 3H).  $^{13}\text{C}$  NMR (151 MHz,  $\text{CDCl}_3$ )  $\delta$  160.04, 144.43, 141.04, 140.87, 132.44, 132.40, 131.43, 129.01, 126.13, 120.29, 117.06, 73.33, 48.54, 38.26, 28.87, 25.60, 23.66, 21.32, 20.72, 14.29, 14.01, 13.84. HRMS (ESI-TOF)  $m/z$  Calcd for  $\text{C}_{22}\text{H}_{29}\text{ClNO}^+$   $[\text{M}+\text{H}]^+$  358.1938, found 358.1937. IR (film)  $\nu_{\text{max}}$  2959, 2930, 2872, 1596, 1483, 1446, 1403, 1336, 1264, 1137, 1074, 962, 864, 830, 780, 732  $\text{cm}^{-1}$ .

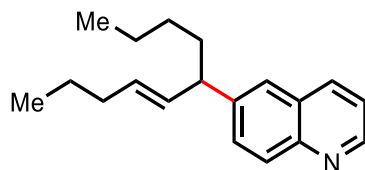

**(E)-6-(Dec-6-en-5-yl)quinoline (5f)** The general procedure 2.7 was followed except using *trans*-5-decene (3 equiv) and purification by preparative TLC (DCM/EA = 10/1) furnished compound **5f** as colorless oil (21.4 mg, 80%,  $\text{C}_6:\text{others} = 90:10$ ). TLC:  $R_f = 0.3$  (hexane/EA = 20/1).  $^1\text{H}$  NMR (600 MHz,  $\text{CDCl}_3$ )  $\delta$  8.85 (dd,  $J = 4.2, 1.8$  Hz, 1H), 8.10 (dd,  $J = 8.4, 1.0$  Hz, 1H), 8.04 (d,  $J = 8.5$  Hz, 1H), 7.60 – 7.57 (m, 2H), 7.36 (dd,  $J = 8.2, 4.2$  Hz, 1H), 5.60 (ddt,  $J = 15.3, 7.7, 1.3$  Hz, 1H), 5.48 (dtd,  $J = 15.1, 6.7, 1.0$  Hz, 1H), 3.38 (q,  $J = 7.5$  Hz, 1H), 2.00 (q,  $J = 7.0$  Hz, 2H), 1.79 – 1.75 (m, 2H), 1.38 (q,  $J = 7.3$  Hz, 2H), 1.34 – 1.29 (m, 3H), 1.22 – 1.17 (m, 1H), 0.87 (q,  $J = 7.2$  Hz, 6H).  $^{13}\text{C}$  NMR (151 MHz,  $\text{CDCl}_3$ )  $\delta$  149.67, 147.27, 144.06, 135.74, 133.73, 130.70, 130.06, 129.33, 128.36, 125.30, 121.00, 48.78, 35.68, 34.68, 29.84, 22.65, 22.59, 14.04, 13.65.

HRMS (ESI-TOF)  $m/z$  Calcd for  $C_{19}H_{26}N^+$   $[M+H]^+$  268.2065, found 268.2066. IR (film)  $\nu_{\max}$  2957, 2927, 2858, 1594, 1572, 1500, 1461, 1377, 1119, 969, 885, 838, 799  $cm^{-1}$ .

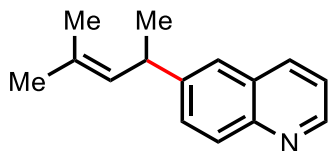

**6-(4-Methylpent-3-en-2-yl)quinoline (5g)** The general procedure 2.7 was followed except using *trans*-4-methyl-2-pentene (3 equiv) and purification by preparative TLC (hexane/EA = 10/1) furnished compound **5g** as colorless oil (13.1 mg, 62%, C6:others = 85:15). TLC:  $R_f$  = 0.3 (hexane/EA = 20/1).  $^1H$  NMR (600 MHz,  $CDCl_3$ )  $\delta$  8.78 (dd,  $J$  = 4.2, 1.7 Hz, 1H), 8.03 (d,  $J$  = 7.8 Hz, 1H), 7.96 (d,  $J$  = 8.5 Hz, 1H), 7.57 – 7.53 (m, 2H), 7.30 – 7.28 (m, 1H), 5.27 (dp,  $J$  = 9.2, 1.4 Hz, 1H), 3.78 (dq,  $J$  = 9.3, 6.9 Hz, 1H), 1.67 (d,  $J$  = 1.4 Hz, 3H), 1.64 (d,  $J$  = 1.4 Hz, 3H), 1.33 (d,  $J$  = 6.9 Hz, 3H).  $^{13}C$  NMR (151 MHz,  $CDCl_3$ )  $\delta$  149.64, 147.18, 145.63, 135.75, 131.47, 129.91, 129.51, 129.36, 128.36, 124.23, 121.01, 38.12, 25.84, 22.36, 18.08. HRMS (ESI-TOF)  $m/z$  Calcd for  $C_{15}H_{18}N^+$   $[M+H]^+$  212.1439, found 212.1450. IR (film)  $\nu_{\max}$  2964, 2925, 1593, 1571, 1499, 1451, 1376, 1322, 1119, 1056, 885, 836, 798  $cm^{-1}$ .

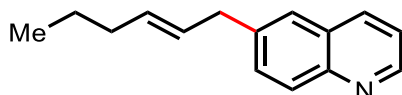

**(E)-6-(Hex-2-en-1-yl)quinoline (5h)** The general procedure 2.7 was followed except using 1-hexene (3 equiv) and purification by preparative TLC (hexane/EA = 10/1) furnished compound **5h** as colorless oil (10.8 mg, 51%, C6:others = 86:14). TLC:  $R_f$  = 0.3 (hexane/EA = 20/1).  $^1H$  NMR (600 MHz,  $CDCl_3$ )  $\delta$  8.88 (dd,  $J$  = 4.2, 1.7 Hz, 1H), 8.12 – 8.10 (m, 1H), 8.05 (d,  $J$  = 8.5 Hz, 1H), 7.61 – 7.59 (m, 2H), 7.40 – 7.38 (m, 1H), 5.69 – 5.64 (m, 1H), 5.63 – 5.58 (m, 1H), 3.54 (d,  $J$  = 6.4 Hz, 2H), 2.09 – 2.04 (m, 2H), 1.46 – 1.42 (m, 2H), 0.94 (t,  $J$  = 7.4 Hz, 3H).  $^{13}C$  NMR (151 MHz,  $CDCl_3$ )  $\delta$  166.80, 151.34, 149.04, 143.61, 136.48, 132.73, 130.27, 129.23, 128.27, 127.28, 121.87, 119.65, 60.69, 14.34. HRMS (ESI-TOF)  $m/z$  Calcd for  $C_{15}H_{18}N^+$   $[M+H]^+$  212.1439, found 212.1445. IR (film)  $\nu_{\max}$  2958, 2928, 2870, 1690, 1593, 1501, 1461, 1378, 1322, 1185, 1119, 969, 888, 835, 799  $cm^{-1}$ .

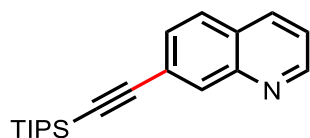

**7-((Triisopropylsilyl)ethynyl)quinoline (6a)** The general procedure 2.8 was followed except using (*S,S*)-**T25** (0.3 equiv), Pd(OAc)<sub>2</sub> (20 mol%), Ac-*L*-Phe-OH (40 mol%), triisopropylsilyl acetylene bromide (4 equiv) at 100 °C and purification by preparative TLC (hexane/EA = 20/1) furnished compound **6a** as colorless oil (5.5 mg, 36%, C7:others = 88:12). TLC: R<sub>f</sub> = 0.3 (hexane/EA = 30/1). <sup>1</sup>H NMR (600 MHz, CDCl<sub>3</sub>) δ 8.95 (dd, *J* = 4.2, 1.7 Hz, 1H), 8.27 (dt, *J* = 1.5, 0.7 Hz, 1H), 8.14 (ddd, *J* = 8.3, 1.8, 0.8 Hz, 1H), 7.76 (d, *J* = 8.3 Hz, 1H), 7.61 (dd, *J* = 8.4, 1.6 Hz, 1H), 7.41 (dd, *J* = 8.2, 4.2 Hz, 1H), 1.19 (d, *J* = 3.0 Hz, 21H). <sup>13</sup>C NMR (151 MHz, CDCl<sub>3</sub>) δ 151.13, 147.90, 135.71, 133.28, 129.50, 127.98, 127.70, 124.67, 121.47, 106.58, 93.19, 18.69, 11.33. HRMS (ESI-TOF) *m/z* Calcd for C<sub>20</sub>H<sub>28</sub>NSi<sup>+</sup> [M+H]<sup>+</sup> 310.1991, found 310.1991. IR (film) ν<sub>max</sub> 2942, 2864, 2152, 1616, 1598, 1493, 1462, 1384, 1318, 1258, 1162, 1072, 1016, 995, 955, 916, 883, 836, 768, 753, 675, 659, 623 cm<sup>-1</sup>.

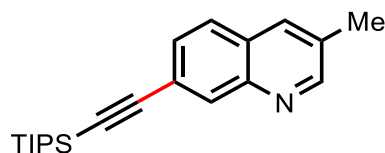

**3-Methyl-7-((triisopropylsilyl)ethynyl)quinoline (6b)** The general procedure 2.8 was followed and purification by preparative TLC (hexane/EA = 20/1) furnished compound **6b** as a pale yellow solid (7.4 mg, 46%, C7:others = 94:6). TLC: R<sub>f</sub> = 0.3 (hexane/EA = 30/1). mp: 47-49 °C. <sup>1</sup>H NMR (600 MHz, CDCl<sub>3</sub>) δ 8.77 (d, *J* = 2.2 Hz, 1H), 8.20 (s, 1H), 7.87 (s, 1H), 7.66 (d, *J* = 8.4 Hz, 1H), 7.54 (dd, *J* = 8.4, 1.6 Hz, 1H), 2.52 (s, 3H), 1.16 (m, 21H). <sup>13</sup>C NMR (151 MHz, CDCl<sub>3</sub>) δ 153.14, 146.09, 134.40, 133.04, 131.07, 129.54, 127.85, 127.04, 123.57, 106.77, 92.53, 18.83, 18.68, 11.33. HRMS (ESI-TOF) *m/z* Calcd for C<sub>21</sub>H<sub>30</sub>NSi<sup>+</sup> [M+H]<sup>+</sup> 324.2148, found 324.2144. IR (film) ν<sub>max</sub> 2942, 2864, 2154, 1609, 1559, 1462, 1383, 1331, 1203, 1135, 1072, 995, 943, 899, 883, 844, 813, 759, 704, 676, 661, 628 cm<sup>-1</sup>.

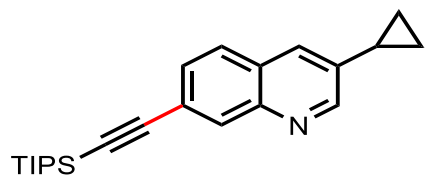

**3-Cyclopropyl-7-((triisopropylsilyl)ethynyl)quinoline (6c)** The general procedure 2.8 was followed and purification by preparative TLC (hexane/EA = 20/1) furnished compound **6c** as colorless oil (6.8 mg, 39%, C7:others = 92:8). TLC:  $R_f = 0.3$  (hexane/EA = 30/1).  $^1\text{H NMR}$  (600 MHz,  $\text{CDCl}_3$ )  $\delta$  8.75 (d,  $J = 2.2$  Hz, 1H), 8.19 (s, 1H), 7.66 (d,  $J = 2.3$  Hz, 1H), 7.64 (d,  $J = 8.4$  Hz, 1H), 7.53 (dd,  $J = 8.4, 1.6$  Hz, 1H), 2.07 (td,  $J = 8.5, 4.2$  Hz, 1H), 1.16 (m, 21H), 1.12 (dt,  $J = 6.6, 1.6$  Hz, 2H), 0.86 (dd,  $J = 5.1, 1.5$  Hz, 2H).  $^{13}\text{C NMR}$  (151 MHz,  $\text{CDCl}_3$ )  $\delta$  151.36, 146.25, 137.35, 133.01, 130.42, 129.59, 127.83, 127.04, 123.37, 106.82, 92.50, 18.69, 13.47, 11.34, 9.38. HRMS (ESI-TOF)  $m/z$  Calcd for  $\text{C}_{23}\text{H}_{32}\text{NSi}^+$   $[\text{M}+\text{H}]^+$  350.2304, found 350.2306. IR (film)  $\nu_{\text{max}}$  2940, 2864, 2157, 2022, 1607, 1462, 1276, 1019, 994, 949, 917, 884, 814, 756, 676, 626  $\text{cm}^{-1}$ .

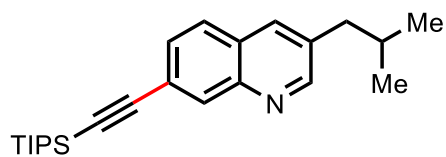

**3-Isobutyl-7-((triisopropylsilyl)ethynyl)quinoline (6d)** The general procedure 2.8 was followed and purification by preparative TLC (hexane/EA = 20/1) furnished compound **6d** as colorless oil (6.9 mg, 38%, C7:others = 92:8). TLC:  $R_f = 0.3$  (hexane/EA = 30/1).  $^1\text{H NMR}$  (600 MHz,  $\text{CDCl}_3$ )  $\delta$  8.74 (d,  $J = 2.2$  Hz, 1H), 8.21 (s, 1H), 7.83 (s, 1H), 7.68 (d,  $J = 8.3$  Hz, 1H), 7.55 (dd,  $J = 8.4, 1.6$  Hz, 1H), 2.66 (d,  $J = 7.2$  Hz, 2H), 2.00 (dt,  $J = 13.5, 7.0$  Hz, 1H), 1.16 (m, 21H), 0.96 (d,  $J = 6.6$  Hz, 6H).  $^{13}\text{C NMR}$  (151 MHz,  $\text{CDCl}_3$ )  $\delta$  153.20, 146.36, 134.75, 134.62, 133.00, 129.47, 127.81, 127.23, 123.66, 106.80, 92.58, 42.58, 30.12, 22.28, 18.68, 11.33. HRMS (ESI-TOF)  $m/z$  Calcd for  $\text{C}_{24}\text{H}_{36}\text{NSi}^+$   $[\text{M}+\text{H}]^+$  366.2617, found 366.2621. IR (film)  $\nu_{\text{max}}$  2957, 2865, 2156, 1463, 1383, 1276, 1262, 1199, 994, 910, 883, 751, 674, 629  $\text{cm}^{-1}$ .

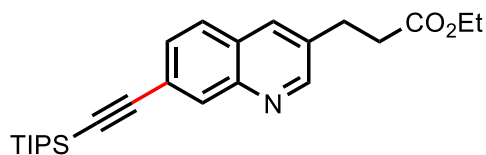

**Ethyl 3-(7-((triisopropylsilyl)ethynyl)quinolin-3-yl)propanoate (6e)** The general procedure 2.8 was followed and purification by preparative TLC (hexane/EA = 5/1) furnished compound **6e** as colorless oil (8.6 mg, 42%, C7:others = 91:9). TLC:  $R_f = 0.3$  (hexane/EA = 10/1).  $^1\text{H}$  NMR (600 MHz,  $\text{CDCl}_3$ )  $\delta$  8.80 (d,  $J = 2.2$  Hz, 1H), 8.20 (s, 1H), 7.92 (s, 1H), 7.68 (d,  $J = 8.4$  Hz, 1H), 7.56 (dd,  $J = 8.4, 1.6$  Hz, 1H), 4.13 (q,  $J = 7.1$  Hz, 2H), 3.14 (t,  $J = 7.6$  Hz, 2H), 2.74 (t,  $J = 7.6$  Hz, 2H), 1.22 (t,  $J = 7.2$  Hz, 3H), 1.16 (m, 21H).  $^{13}\text{C}$  NMR (151 MHz,  $\text{CDCl}_3$ )  $\delta$  172.28, 152.42, 146.56, 134.15, 133.74, 133.01, 129.69, 127.72, 127.30, 124.04, 106.65, 92.89, 60.71, 35.26, 28.26, 18.68, 14.19, 11.33. HRMS (ESI-TOF)  $m/z$  Calcd for  $\text{C}_{25}\text{H}_{36}\text{NO}_2\text{Si}^+$   $[\text{M}+\text{H}]^+$  410.2515, found 410.2528. IR (film)  $\nu_{\text{max}}$  2939, 2864, 2153, 1735, 1462, 1373, 1333, 1296, 1238, 1190, 1017, 994, 907, 883, 674, 628  $\text{cm}^{-1}$ .

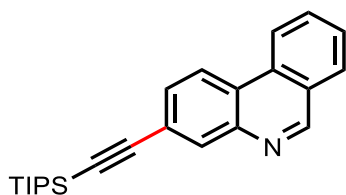

**3-((Triisopropylsilyl)ethynyl)phenanthridine (6f)** The general procedure 2.8 was followed and purification by preparative TLC (hexane/EA = 20/1) furnished compound **6f** as a white solid (5.6 mg, 31%,  $\text{C}_{\text{shown}}$ :others = 92:8). TLC:  $R_f = 0.3$  (hexane/EA = 30/1). mp: 55-57  $^{\circ}\text{C}$ .  $^1\text{H}$  NMR (600 MHz,  $\text{CDCl}_3$ )  $\delta$  9.29 (s, 1H), 8.59 (d,  $J = 8.2$  Hz, 1H), 8.50 (d,  $J = 8.5$  Hz, 1H), 8.32 (d,  $J = 1.7$  Hz, 1H), 8.06 (d,  $J = 8.5$  Hz, 1H), 7.88 (t,  $J = 7.7$  Hz, 1H), 7.76 – 7.71 (m, 2H), 1.18 (m, 21H).  $^{13}\text{C}$  NMR (151 MHz,  $\text{CDCl}_3$ )  $\delta$  154.26, 144.14, 133.89, 132.19, 131.24, 130.15, 128.89, 127.88, 126.53, 124.03, 123.86, 122.22, 122.08, 106.61, 92.64, 18.70, 11.35. HRMS (ESI-TOF)  $m/z$  Calcd for  $\text{C}_{24}\text{H}_{30}\text{NSi}^+$   $[\text{M}+\text{H}]^+$  360.2148, found 360.2148. IR (film)  $\nu_{\text{max}}$  2939, 2864, 2160, 1678, 1612, 1462, 1384, 1249, 1203, 1072, 997, 949, 884, 828, 784, 708, 675, 660, 628  $\text{cm}^{-1}$ .

### 3. Computational Studies

#### 3.1 Computational Methods

All DFT calculations were performed with the Gaussian 16 package<sup>16</sup>. Geometry optimizations were performed in the gas phase with the PBE0<sup>17,18</sup> functional combined with the D3 version of Grimme's dispersion with Becke-Johnson damping(GD3BJ)<sup>19</sup> using the 6-31G(d)<sup>20-22</sup> basis set for all nonmetal atoms and the LANL2DZ<sup>23,24</sup> basis set with effective core potential (ECP) for Pd. Frequency analysis was conducted at the same level of theory to verify the stationary points to be minima or saddle points and to obtain zero-point vibrational energy (ZPVE) and thermal energy corrections at 298.15 K and 1 atm pressure. All transition states were confirmed to connect reactants and products by intrinsic reaction coordinate (IRC) calculations. Single-point solvation energies were calculated with 6-311++G(d,p)<sup>25</sup> for all nonmetal atoms and SDD<sup>26,27</sup> for Pd by using the SMD<sup>28,29</sup> solvation model with HFIP (Eps=16.7, EpsInf=1.625625). Detailed methods benchmarks were done for geometry optimization, high basis set energy calculations and SMD solvation model with different HFIP parameters<sup>30-33</sup>. Conformational searches were carried out using MMFF in Spartan 18<sup>34</sup> and the CREST conformer-rotamer ensemble sampling tool, version 2.7.1<sup>35,36</sup> with XTB version 6.2 RC2 (SAW190805)<sup>37-39</sup>. Grimme<sup>40</sup> correction (frequency cut-off is 100 cm<sup>-1</sup>) for entropy and Head-Gordon<sup>41</sup> correction for enthalpy are performed at 100°C using GoodVibes v3.0.1<sup>42</sup>. Unless otherwise noted, the relative energies reported in the text are Gibbs free energies with solvent effect corrections. Computed structures are illustrated using CYLView<sup>43</sup>.

#### 3.2 Methods Benchmark

The popular DFT methods for organometallics are tested for the key CMD TSs. Through the overlay of the optimized CMD TSs with different functionals (**Figure S2**), we could

see that the optimized structures are similar at the catalytic center and a little difference in the template portion. PBE0 is one of the popular density functionals for the geometry optimization<sup>44-46</sup> of organometallic systems as well as energy calculations<sup>47-49</sup> and have a good performance with adding D3 version of Grimme's dispersion with Becke-Johnson damping. All of the geometries are optimized with PBE0-D3(BJ) functional for the following energy benchmark.

Energy benchmarks are shown in **Table S8** and **Table S9** and the corresponding free energy profiles with different methods are shown in **Figure S3-S12**. The most popular 8 methods for organometallic systems, including GGA functional BP86, meta-GGA functional M06L, hybrid functional B3LYP-D3BJ, B3PW91, PBE0-D3BJ and MN15, hybrid-meta GGA functional M06 and range-separated GGA functional WB97X-D, are tested for the key intermediate and all the TSs. Based on the calculations, we found that these studies require careful benchmarking of methods, attention to the variability of rate-determining step, and exploration of rather complicated surfaces, but ultimately the origins of selectivity can be determined for most of the functionals. M06L, WB97X-D and PBE0-D3BJ were found to be the best three functionals working for both of C6 selective C–H olefination reactions with **T12** and C7 selective C–H olefination reactions with *cis*-**T25**. As shown in **Table S9** and **Figure S7**, solvent effect needs to be considered and HFIP parameters a and b work better than HFIP c parameter.

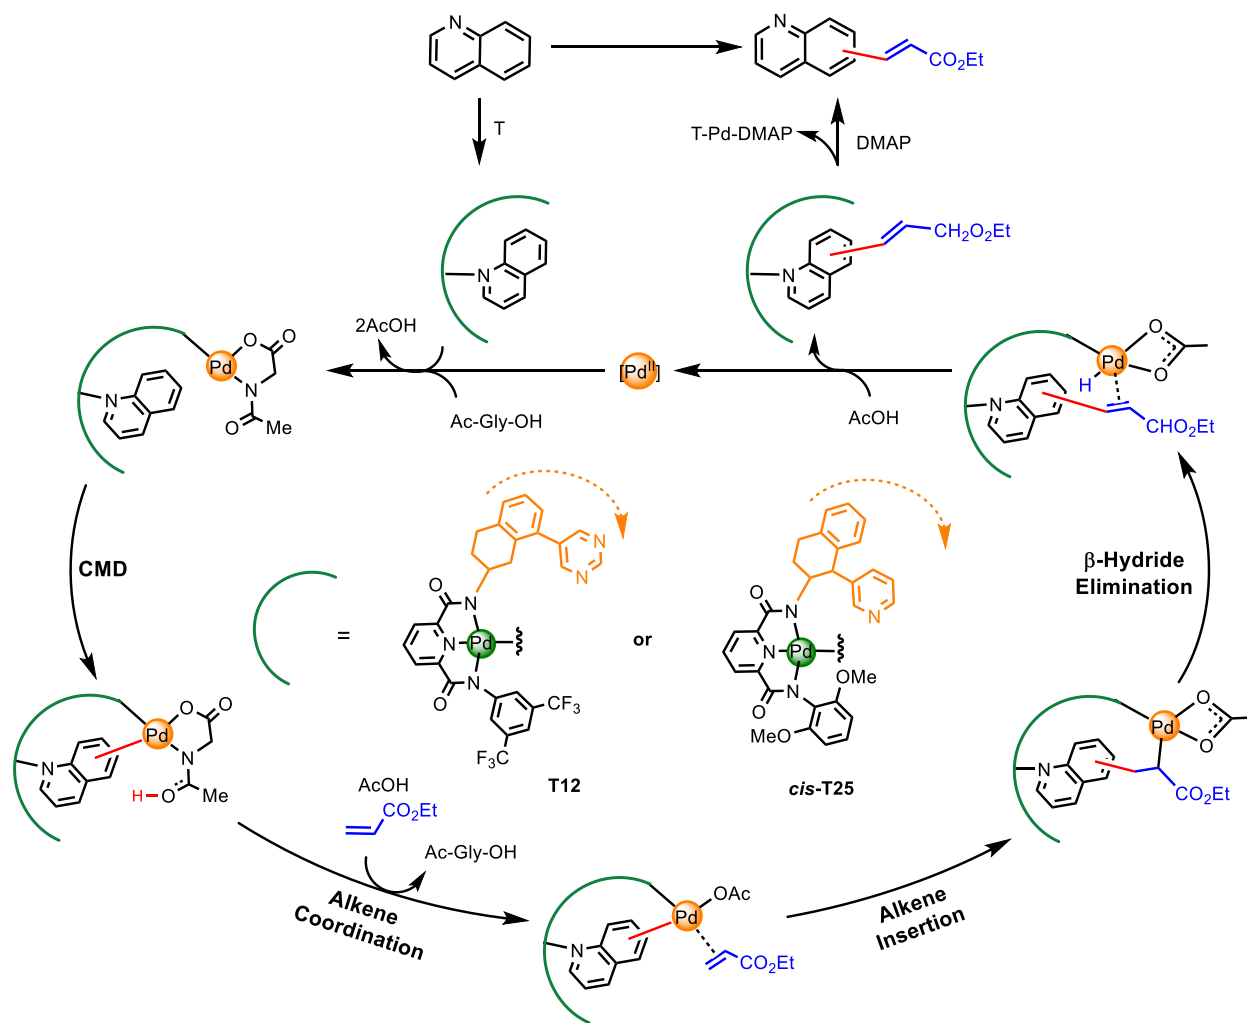

Figure S1. Proposed mechanism.



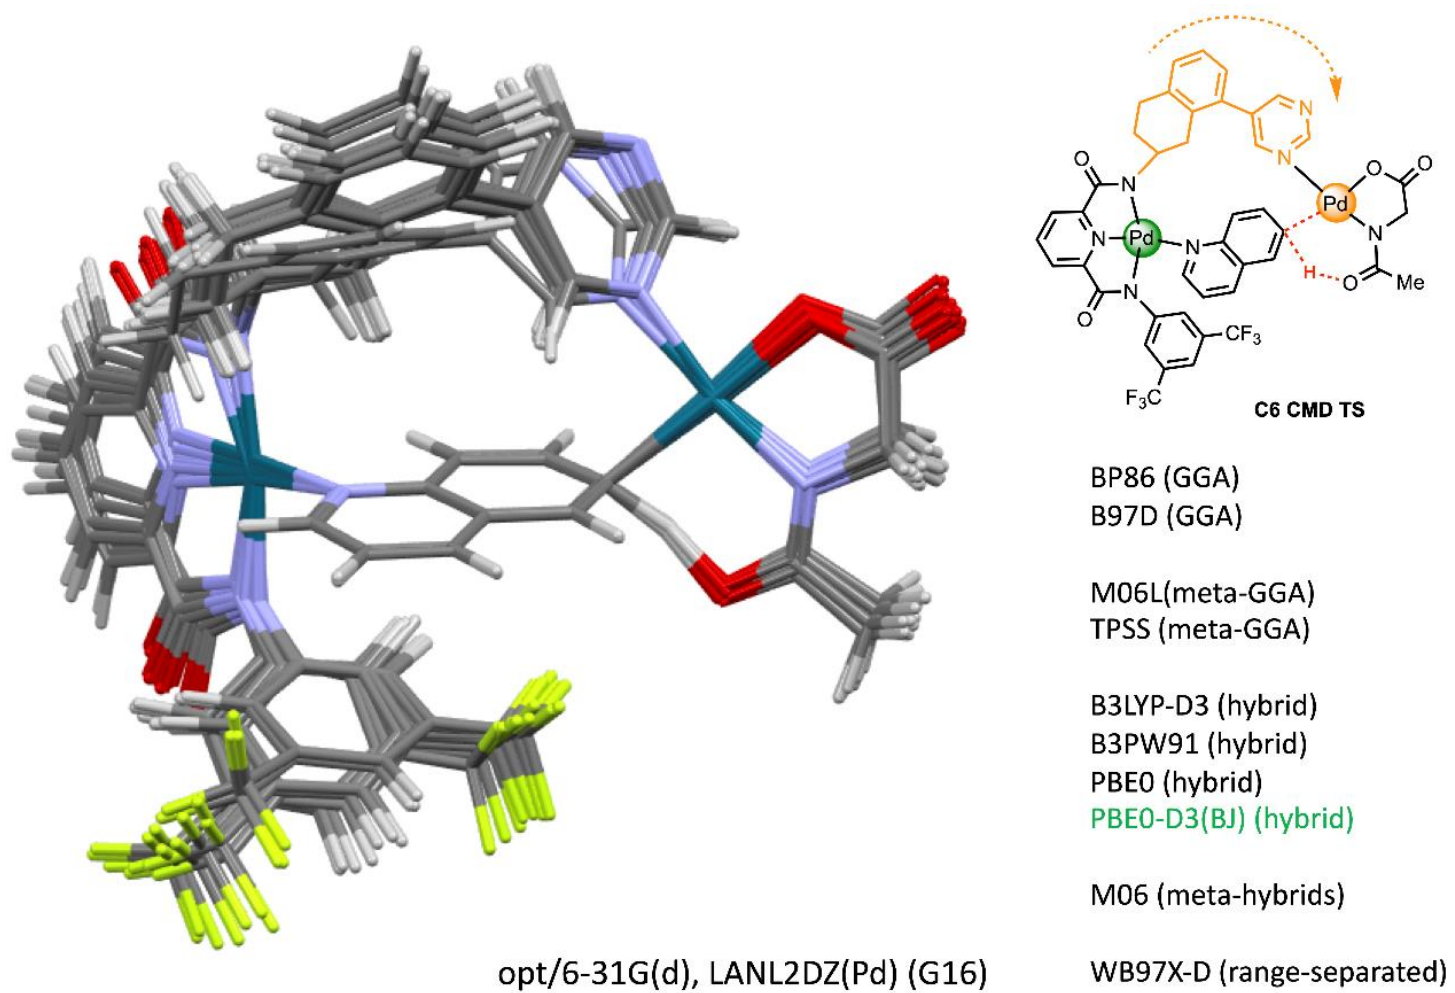

**Figure S2.** Overlay of optimized structures of C6 CMD TSs with **T12** using different functionals.

**Table S8.** Methods benchmark for energies.

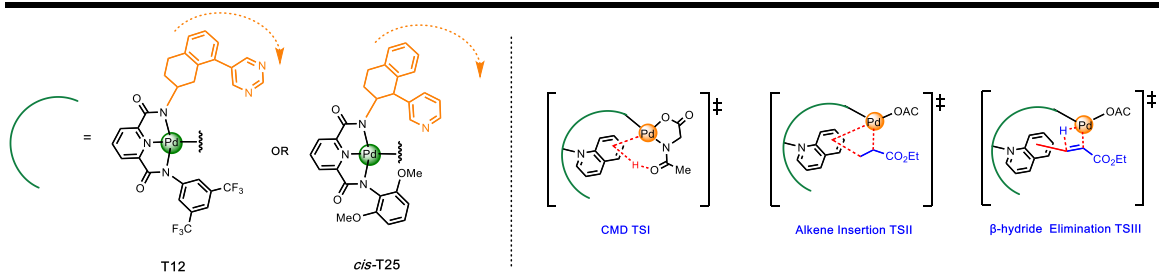

|                         | B3LYP-D3BJ       |                           | M06              |                           | MN15             |                           | M06L             |                           | WB97X-D          |                           | B3PW91           |                           | BP86             |                           | PBE0-D3BJ        |                           |
|-------------------------|------------------|---------------------------|------------------|---------------------------|------------------|---------------------------|------------------|---------------------------|------------------|---------------------------|------------------|---------------------------|------------------|---------------------------|------------------|---------------------------|
|                         | $\Delta\Delta G$ | $\Delta G_{\text{Total}}$ |
| <b>T12_C5_TSI</b>       | -2.0             |                           | -1.6             |                           | -2.0             |                           | -1.1             |                           | -1.4             |                           | 5.4              |                           | 5.1              |                           | -1.5             |                           |
| <b>T12_C6_TSI</b>       | 0.0              |                           | 0.0              | 19.2                      | 0.0              | 21.7                      | 0.0              |                           | 0.0              |                           | 0.0              |                           | 0.0              |                           | 0.0              |                           |
| <b>T12_C7_TSI</b>       | 2.4              |                           | 2.7              | 21.9                      | 2.4              | 24.1                      | 1.3              | 25.7                      | 3.0              | 22.8                      | 6.4              |                           | 6.0              |                           | 2.8              | 17.6                      |
| <b>T12_C5_TSII</b>      | 1.0              | 23.3                      | 2.8              |                           | 0.5              |                           | 1.3              | 26.6                      | 1.9              | 22.0                      | 12.9             | 36.3                      | 12.5             | 33.8                      | 2.3              |                           |
| <b>T12_C6_TSII</b>      | 0.0              | 22.2                      | 0.0              |                           | 0.0              |                           | 0.0              | 25.3                      | 0.0              | 20.0                      | 0.0              | 23.4                      | 0.0              | 21.4                      | 0.0              |                           |
| <b>T12_C7_TSII</b>      | -0.7             | 21.5                      | 0.8              |                           | 2.1              |                           | -0.3             |                           | -0.7             |                           | 7.0              | 30.3                      | 6.8              | 28.1                      | -0.3             |                           |
| <b>T12_C5_TSIII</b>     | 5.7              |                           | 6.4              | 18.5                      | 7.9              | 21.2                      | 6.6              |                           | 6.1              |                           | 8.6              |                           | 8.0              |                           | 6.2              | 18.3                      |
| <b>T12_C6_TSIII</b>     | 0.0              |                           | 0.0              |                           | 0.0              |                           | 0.0              |                           | 0.0              |                           | 0.0              |                           | 0.0              |                           | 0.0              | 15.7                      |
| <b>T12_C7_TSIII</b>     | -3.1             |                           | -2.5             |                           | -3.2             |                           | -4.4             |                           | -3.5             |                           | 12.2             |                           | 12.3             |                           | -1.9             |                           |
| <b>Selectivity</b>      |                  | <b>C7</b>                 |                  | <b>C5</b>                 |                  | <b>C5</b>                 |                  | <b>C6</b>                 |
|                         | B3-D3BJ          |                           | M06              |                           | MN15             |                           | M06L             |                           | WB97X-D          |                           | B3PW91           |                           | BP86             |                           | PBE0-D3BJ        |                           |
|                         | $\Delta\Delta G$ | $\Delta G_{\text{Total}}$ |
| <i>cis</i> -T25_C5_TSI  | 1.2              |                           | 0.5              |                           | 1.1              |                           | 1.9              |                           | 1.4              |                           | -2.0             |                           | -1.4             |                           | 1.2              |                           |
| <i>cis</i> -T25_C6_TSI  | 1.3              |                           | 0.5              |                           | 1.4              |                           | 2.2              |                           | 1.3              |                           | -4.3             |                           | -3.5             |                           | 1.1              |                           |
| <i>cis</i> -T25_C7_TSI  | 0.0              |                           | 0.0              |                           | 0.0              |                           | 0.0              |                           | 0.0              |                           | 0.0              |                           | 0.0              |                           | 0.0              |                           |
| <i>cis</i> -T25_C5_TSII | 4.2              | 30.6                      | 5.6              | 25.2                      | 4.0              | 29.7                      | 5.2              | 33.6                      | 5.6              | 29.6                      | 1.4              | 31.1                      | 1.3              | 28.6                      | 4.8              |                           |
| <i>cis</i> -T25_C6_TSII | 0.9              | 28.0                      | 1.9              |                           | 1.3              | 27.0                      | 2.7              | 31.1                      | 2.6              | 26.6                      | -5.3             | 24.3                      | -5.0             | 22.3                      | 1.7              |                           |

|                          |      |           |      |           |      |           |      |           |      |           |      |           |      |           |           |
|--------------------------|------|-----------|------|-----------|------|-----------|------|-----------|------|-----------|------|-----------|------|-----------|-----------|
| <i>cis</i> -T25_C7_TSII  | 0.0  | 25.9      | 0.0  | 0.0       | 25.7 | 0.0       | 28.3 | 0.0       | 24.1 | 0.0       | 29.6 | 0.0       | 27.3 | 0.0       | 20.5      |
| <i>cis</i> -T25_C5_TSIII | 11.1 |           | 10.2 | 12.2      |      | 10.0      |      | 12.6      |      | 0.9       |      | 0.9       |      | 10.5      | 24.1      |
| <i>cis</i> -T25_C6_TSIII | 7.5  |           | 5.8  | 24.1      | 9.0  |           | 7.2  | 9.3       |      | -3.6      |      | -3.7      |      | 7.2       | 26.3      |
| <i>cis</i> -T25_C7_TSIII | 0.0  |           | 0.0  | 19.7      | 0.0  |           | 0.0  | 0.0       |      | 0.0       |      | 0.0       |      | 0.0       |           |
| <b>Selectivity</b>       |      | <b>C7</b> |      | <b>C7</b> |      | <b>C7</b> |      | <b>C7</b> |      | <b>C6</b> |      | <b>C6</b> |      | <b>C6</b> | <b>C7</b> |

Note: Methods/6-311++G(d,p), SDD(Pd), SMD(Eps=16.7, EpsInf=1.625625) // PBE0-D3BJ/6-31G(d), LANL2DZ(Pd), with Grimme correction for entropy and Head-Gordon correction for enthalpy at 100°C.

**Table S9.** Benchmark for HFIP parameters.

|                             | gas              |                                                                                                                                                                                                                                | HFIP <sup>a</sup> |                           | HFIP <sup>b</sup> |                                                                                                                                                                                                                                                        | HFIP <sup>c</sup> |                           |  |
|-----------------------------|------------------|--------------------------------------------------------------------------------------------------------------------------------------------------------------------------------------------------------------------------------|-------------------|---------------------------|-------------------|--------------------------------------------------------------------------------------------------------------------------------------------------------------------------------------------------------------------------------------------------------|-------------------|---------------------------|--|
|                             | $\Delta\Delta G$ | $\Delta G_{\text{Total}}$                                                                                                                                                                                                      | $\Delta\Delta G$  | $\Delta G_{\text{Total}}$ | $\Delta\Delta G$  | $\Delta G_{\text{Total}}$                                                                                                                                                                                                                              | $\Delta\Delta G$  | $\Delta G_{\text{Total}}$ |  |
| T12_C5_TSI                  | -3.3             |                                                                                                                                                                                                                                | -1.5              |                           | -3.8              |                                                                                                                                                                                                                                                        | -8.4              |                           |  |
| T12_C6_TSI                  | 0.0              | 21.4                                                                                                                                                                                                                           | 0.0               |                           | 0.0               |                                                                                                                                                                                                                                                        | 0.0               | 25.7                      |  |
| T12_C7_TSI                  | 0.0              | 21.4                                                                                                                                                                                                                           | 2.8               | 17.6                      | 3.2               | 18.3                                                                                                                                                                                                                                                   | 0.6               | 26.3                      |  |
| T12_C5_TSII                 | -1.4             |                                                                                                                                                                                                                                | 2.3               |                           | -0.6              |                                                                                                                                                                                                                                                        | -6.3              |                           |  |
| T12_C6_TSII                 | 0.0              |                                                                                                                                                                                                                                | 0.0               |                           | 0.0               |                                                                                                                                                                                                                                                        | 0.0               |                           |  |
| T12_C7_TSII                 | 0.7              |                                                                                                                                                                                                                                | -0.3              |                           | -1.1              |                                                                                                                                                                                                                                                        | -2.5              |                           |  |
| T12_C5_TSIII                | 6.5              | 22.9                                                                                                                                                                                                                           | 6.2               | 18.3                      | 6.5               | 21.6                                                                                                                                                                                                                                                   | 7.2               | 27.4                      |  |
| T12_C6_TSIII                | 0.0              |                                                                                                                                                                                                                                | 0.0               | 15.7                      | 0.0               | 17.4                                                                                                                                                                                                                                                   | 0.0               |                           |  |
| T12_C7_TSIII                | -6.3             |                                                                                                                                                                                                                                | -1.9              |                           | -5.2              |                                                                                                                                                                                                                                                        | -12.4             |                           |  |
| <b>Selectivity</b>          |                  | <b>C7</b>                                                                                                                                                                                                                      |                   | <b>C6</b>                 |                   | <b>C6</b>                                                                                                                                                                                                                                              |                   | <b>C6</b>                 |  |
| HFIP <sup>a</sup>           |                  | HFIP <sup>b</sup>                                                                                                                                                                                                              |                   |                           |                   | HFIP <sup>c</sup>                                                                                                                                                                                                                                      |                   |                           |  |
| Eps=16.7<br>EpsInf=1.625625 |                  | stoichiometry=C3H2O1F6<br>eps=17.8<br>solventname=2-propanol<br>epsinf=1.89<br>molarvolume=94.1<br>rsolv=2.82<br>SurfaceTensionAtInterface=23.23<br>ElectronegativeHalogenicity=0.6<br>HBondAcidity=0.57<br>hbondbasicity=0.25 |                   |                           |                   | stoichiometry=C3H2F6O1<br>solventname=1,1,1,3,3,3-hexafluoropropan-2-ol<br>eps=16.7<br>epsinf=1.625625<br>HBondAcidity=1.96<br>HBondBasicity=0.00<br>SurfaceTensionAtInterface=23.2306248<br>CarbonAromaticity=0.0<br>ElectronegativeHalogenicity=0.60 |                   |                           |  |

|  |               |  |
|--|---------------|--|
|  | density=0.158 |  |
|--|---------------|--|

Note: PBE0-D3BJ /6-311++G(d,p), SDD(Pd), SMD(HFIP parametes) // PBE0-D3BJ/6-31G(d), LANL2DZ(Pd), with Grimme correction for entropy and Head-Gordon correction for enthalpy at 100°C.

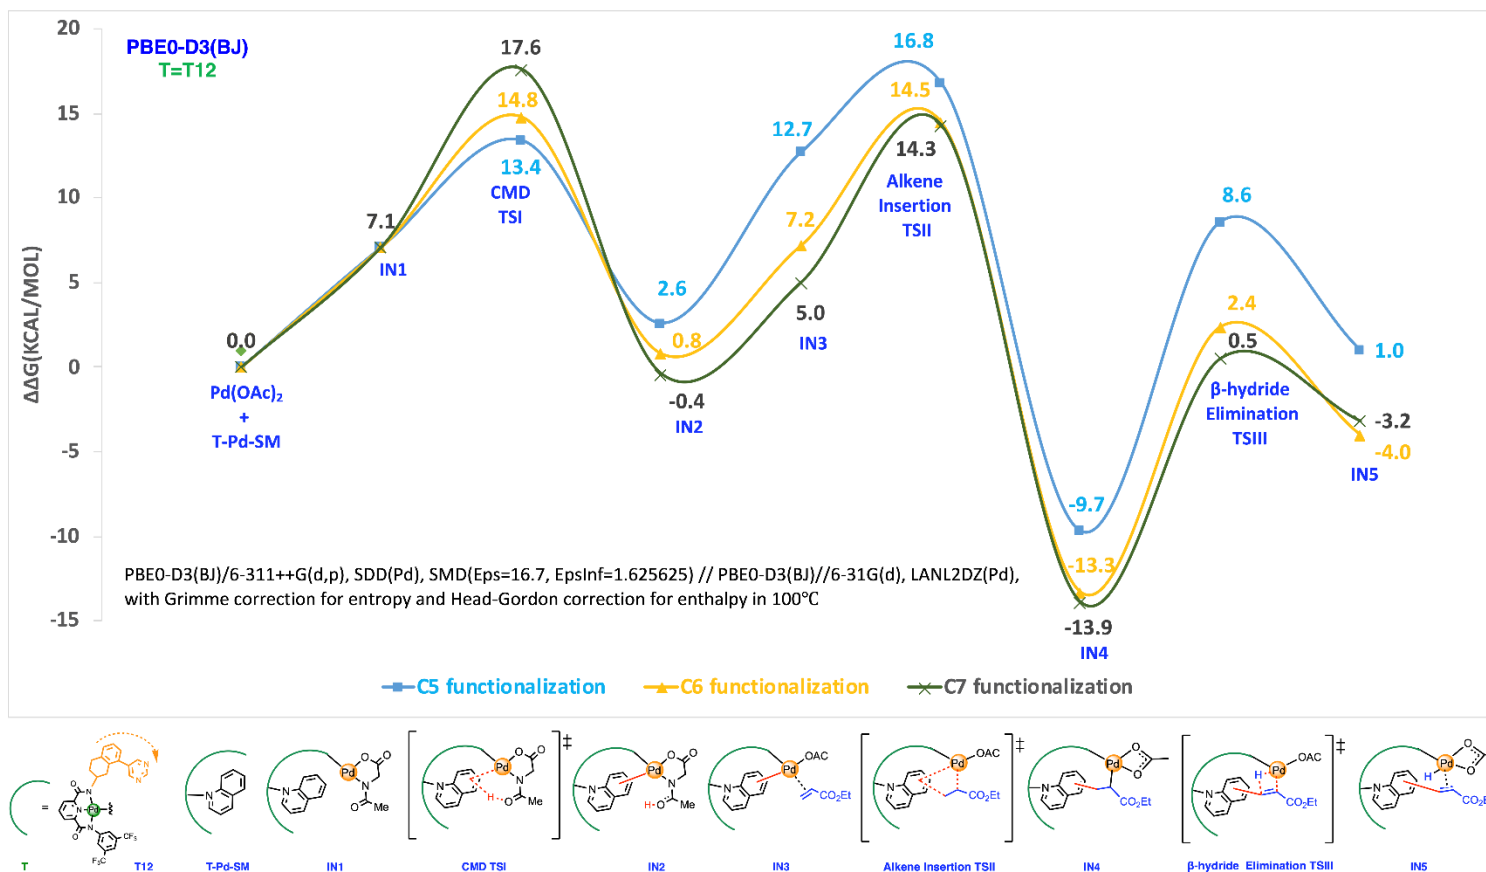

**Figure S3.** Free energy profiles with template **T12** for C6 selective C–H olefination reactions of quinoline under the level of PBE0-D3(BJ)/6-311++G(d,p), SDD(Pd), SMD(Eps=16.7, EpsInf=1.625625) //PBE0-D3(BJ)//6-31G(d), LANL2DZ(Pd). All energies are in kcal/mol.

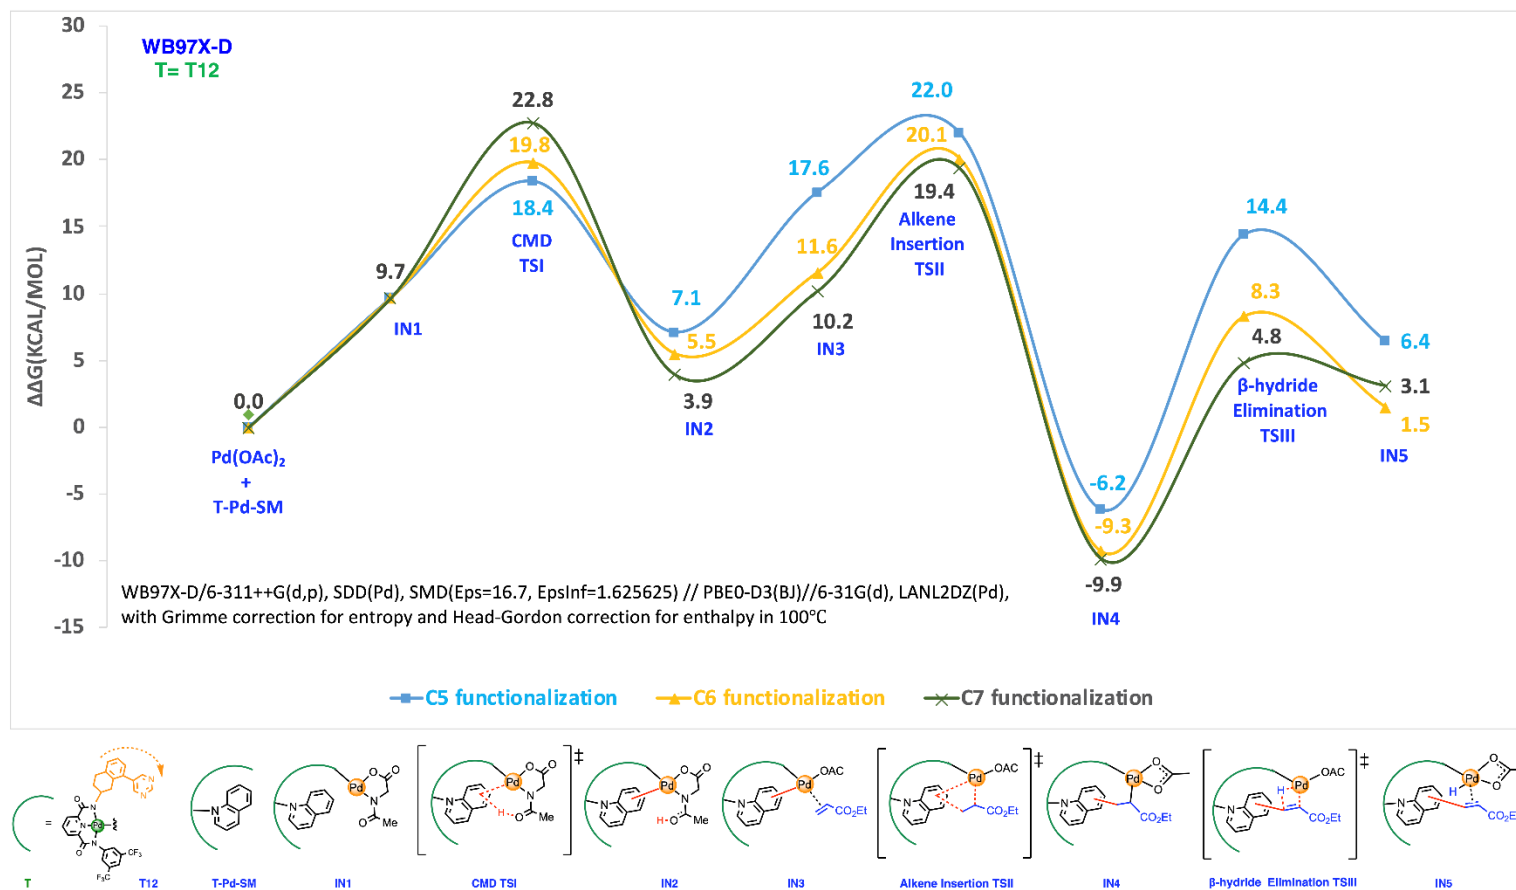

**Figure S4.** Free energy profiles with template **T12** for C6 selective C–H olefination reactions of quinoline under the level of WB97X-D/6-311++G(d,p), SDD(Pd), SMD(Eps=16.7, EpsInf=1.625625) // PBE0-D3(BJ)//6-31G(d), LANL2DZ(Pd). All energies are in kcal/mol.

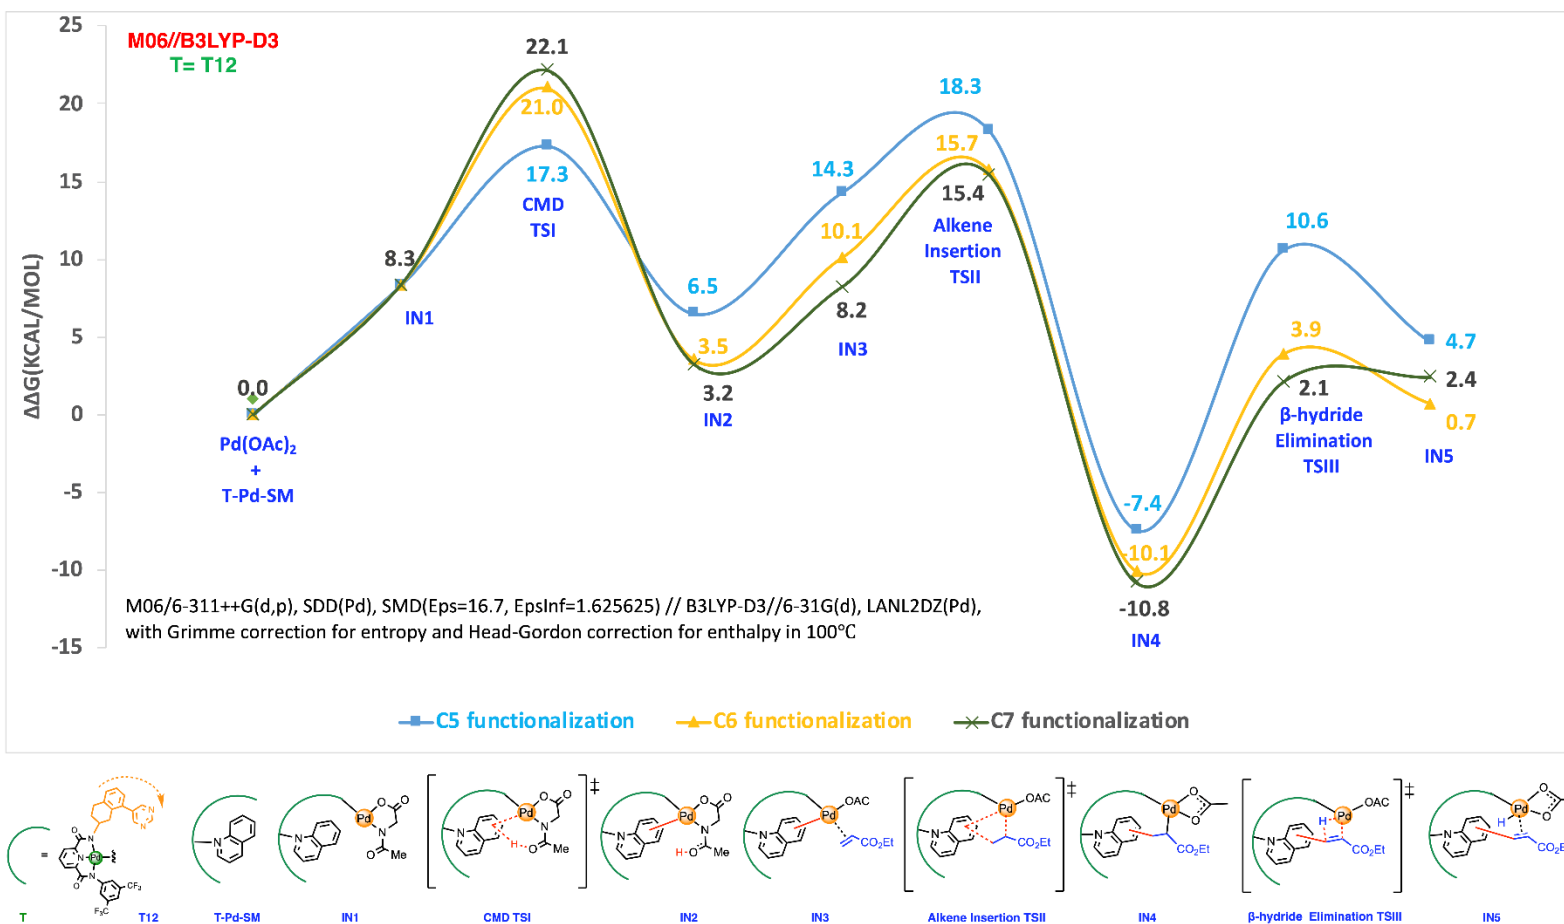

**Figure S5.** Free energy profiles with template **T12** for C6 selective C–H olefination reactions of quinoline under the level of M06/6-311++G(d,p), SDD(Pd), SMD(Eps=16.7, EpsInf=1.625625) // B3LYP-D3//6-31G(d), LANL2DZ(Pd). All energies are in kcal/mol.

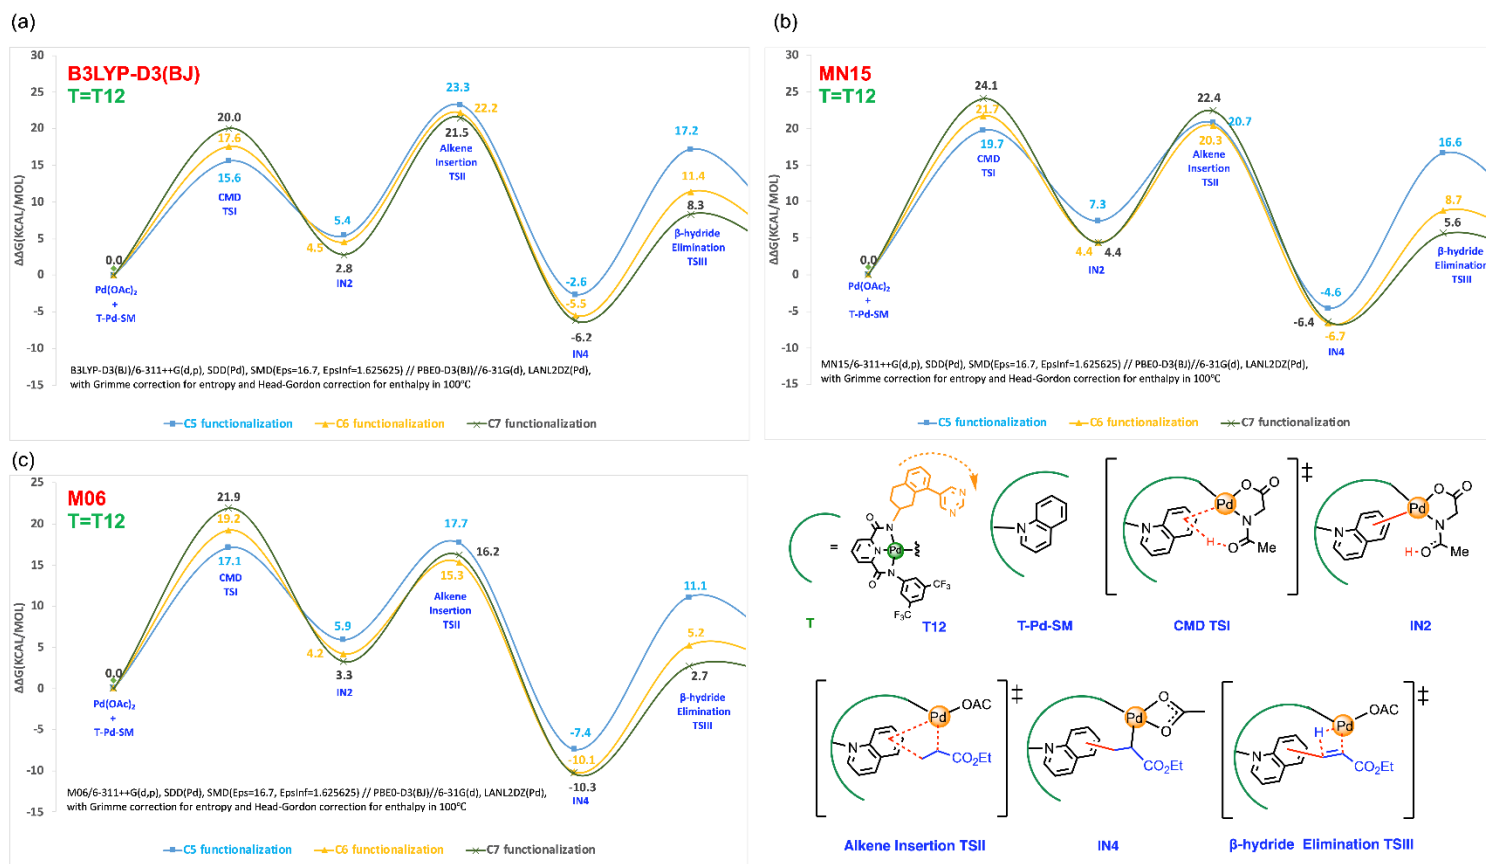

**Figure S6A.** Free energy profiles with template **T12** for C6 selective C–H olefination reactions of quinoline under the level of (a) B3LYP-D3(BJ), (b) MN15, (c) M06 /6-311++G(d,p), SDD(Pd), SMD(Eps=16.7, EpsInf=1.625625) // PBE0-D3(BJ)//6-31G(d), LANL2DZ(Pd). All energies are in kcal/mol.



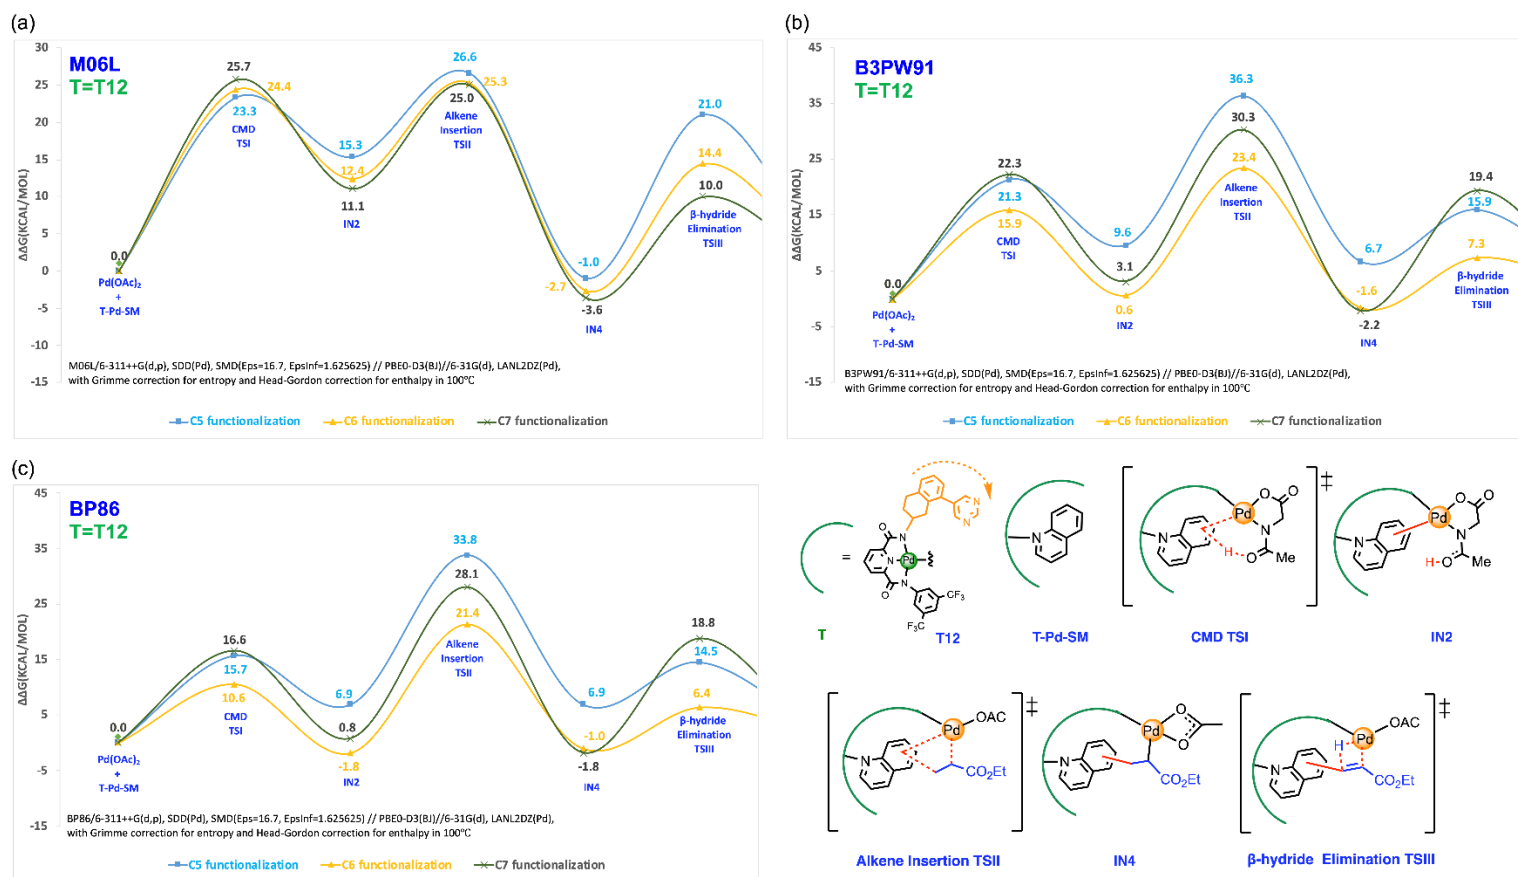

**Figure S6B.** Free energy profiles with template **T12** for C6 selective C–H olefination reactions of quinoline under the level of (a) M06L, (b) B3PW91, (c) BP86 /6-311++G(d,p), SDD(Pd), SMD(Eps=16.7, EpsInf=1.625625) // PBE0-D3(BJ)//6-31G(d), LANL2DZ(Pd). All energies are in kcal/mol.

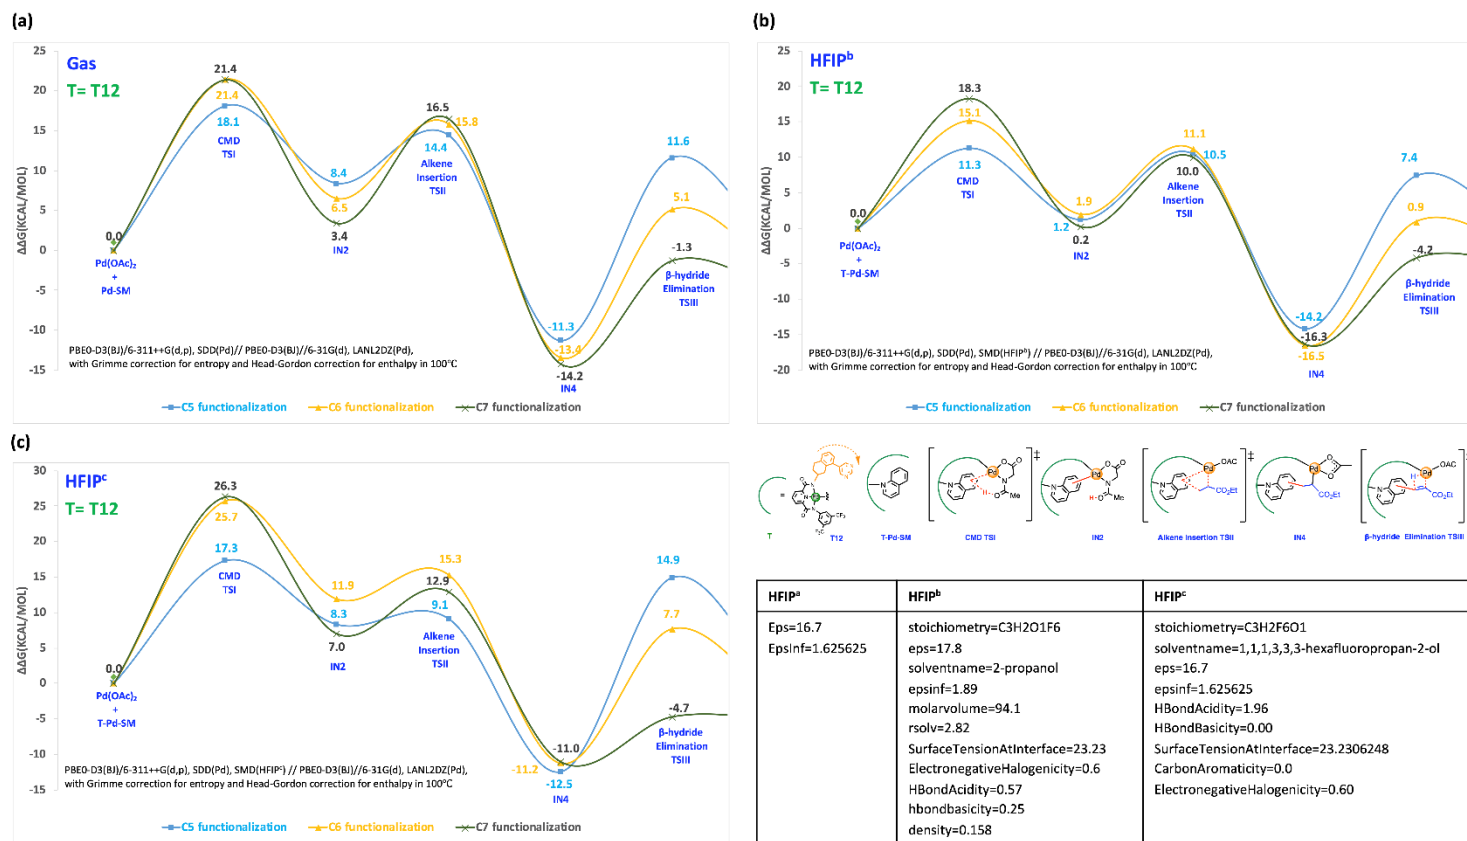

**Figure S7.** Free energy profiles with template **T12** for C6 selective C–H olefination reactions of quinoline under the level of PBE0-D3(BJ)/6-311++G(d,p), SDD(Pd) // PBE0-D3(BJ)/6-31G(d), LANL2DZ(Pd) (a) in gas phase, or (b) and (c) using SMD model with different HFIP parameters. All energies are in kcal/mol.

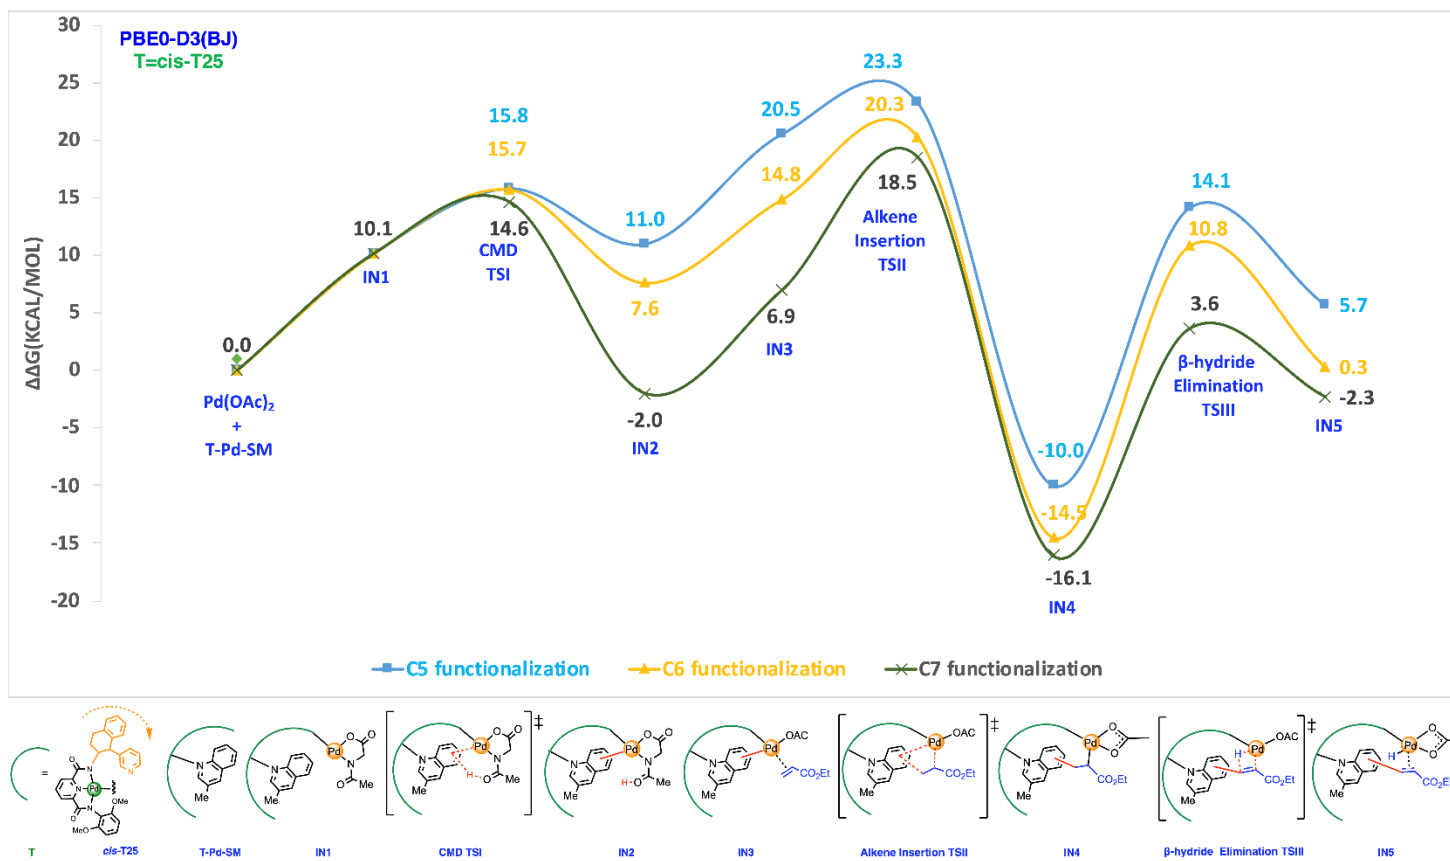

**Figure S8.** Free energy profiles with template *cis*-T25 for C7 selective C–H olefination reactions of 3-methylquinoline under the level of PBE0-D3(BJ)/6-311++G(d,p), SDD(Pd), SMD(Eps=16.7, EpsInf=1.625625) //PBE0-D3(BJ)//6-31G(d), LANL2DZ(Pd). All energies are in kcal/mol.

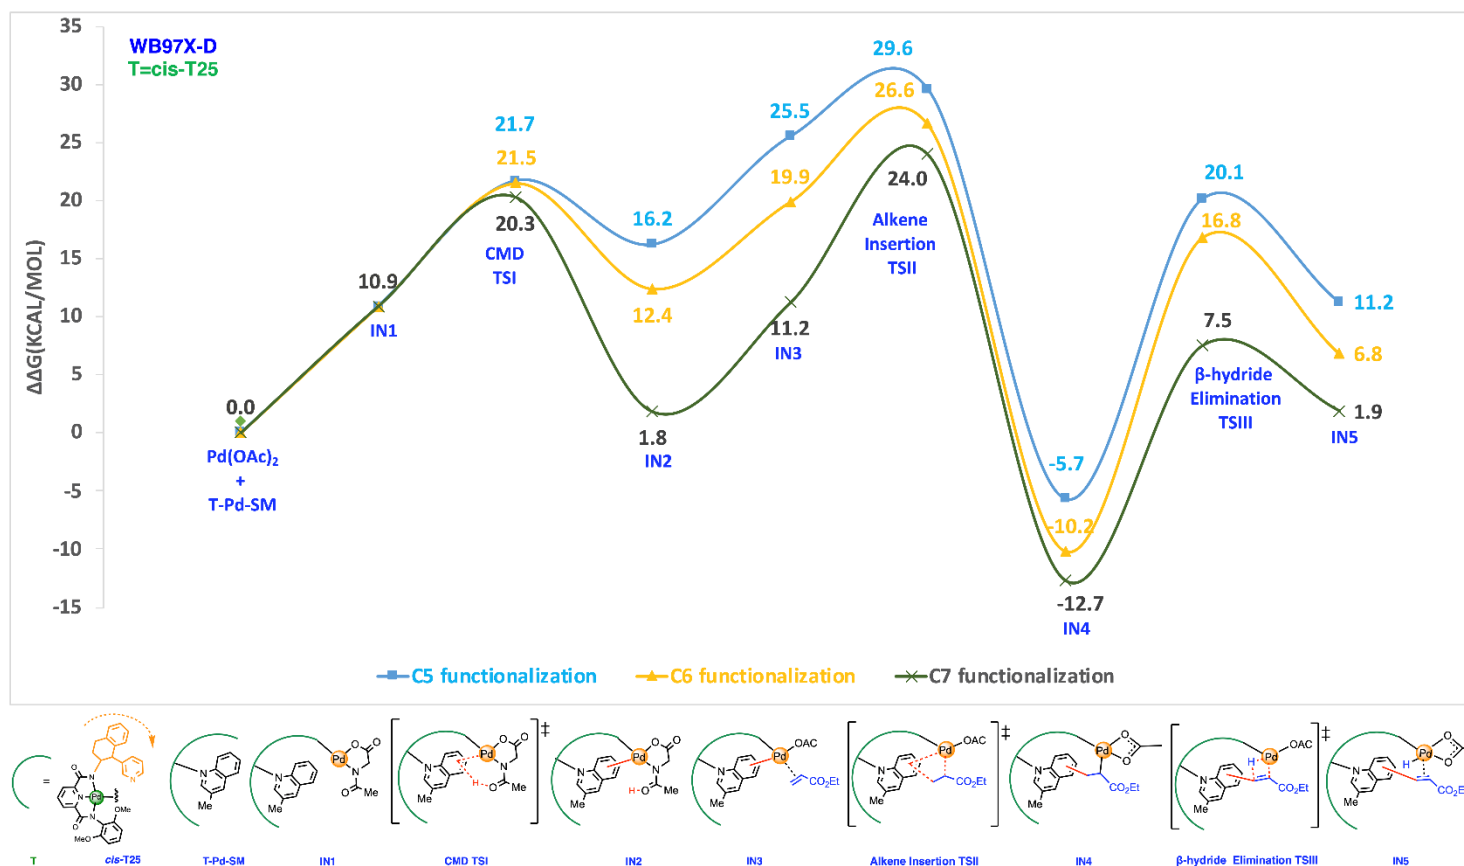

**Figure S9.** Free energy profiles with template *cis*-T25 for C7 selective C–H olefination reactions of 3-methylquinoline under the level of WB97X-D/6-311++G(d,p), SDD(Pd), SMD(Eps=16.7, EpsInf=1.625625) // PBE0-D3(BJ)//6-31G(d), LANL2DZ(Pd). All energies are in kcal/mol.

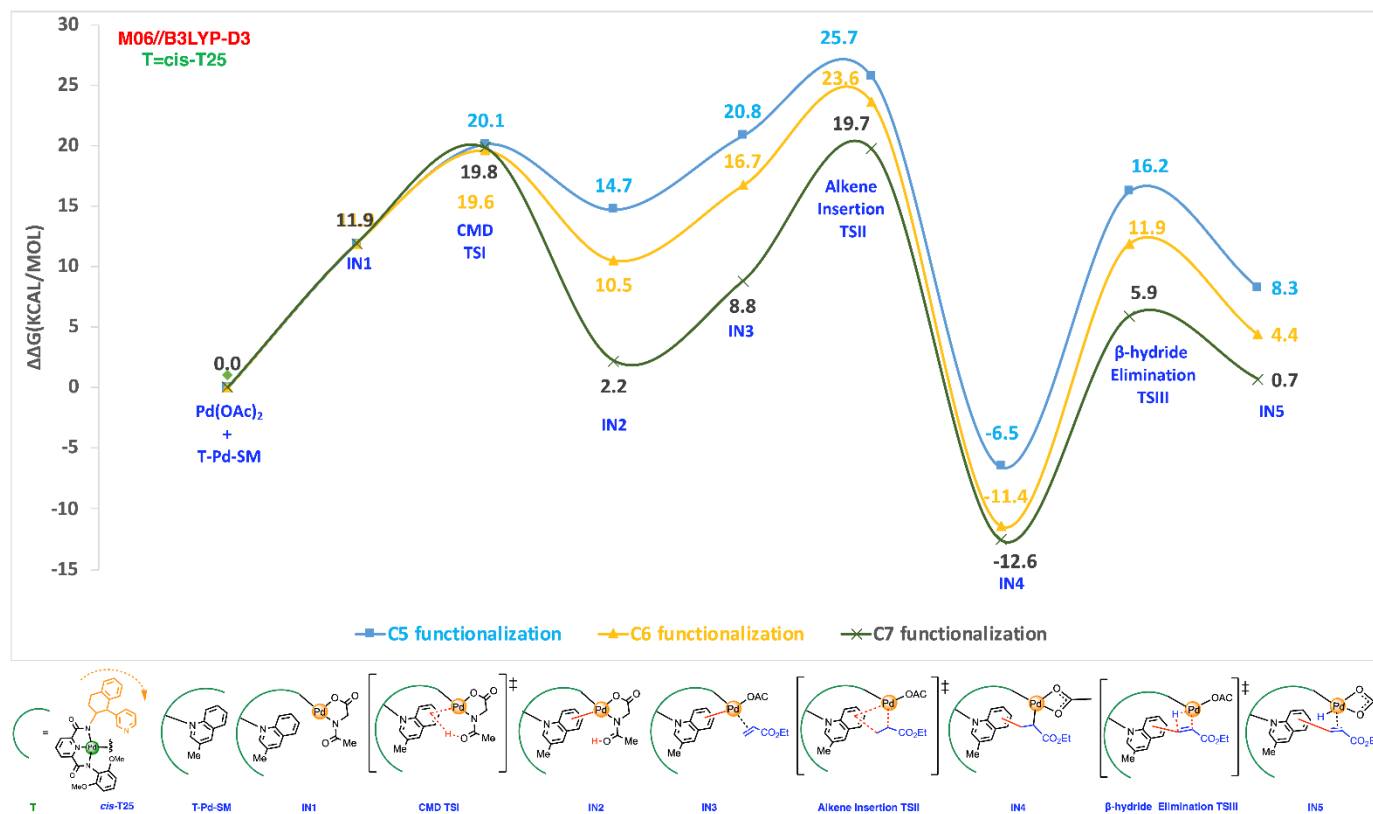

**Figure S10.** Free energy profiles with template *cis*-T25 for C7 selective C–H olefination reactions of 3-methylquinoline under the level of M06/6-311++G(d,p), SDD(Pd), SMD(Eps=16.7, EpsInf=1.625625) // B3LYP-D3//6-31G(d), LANL2DZ(Pd). All energies are in kcal/mol.

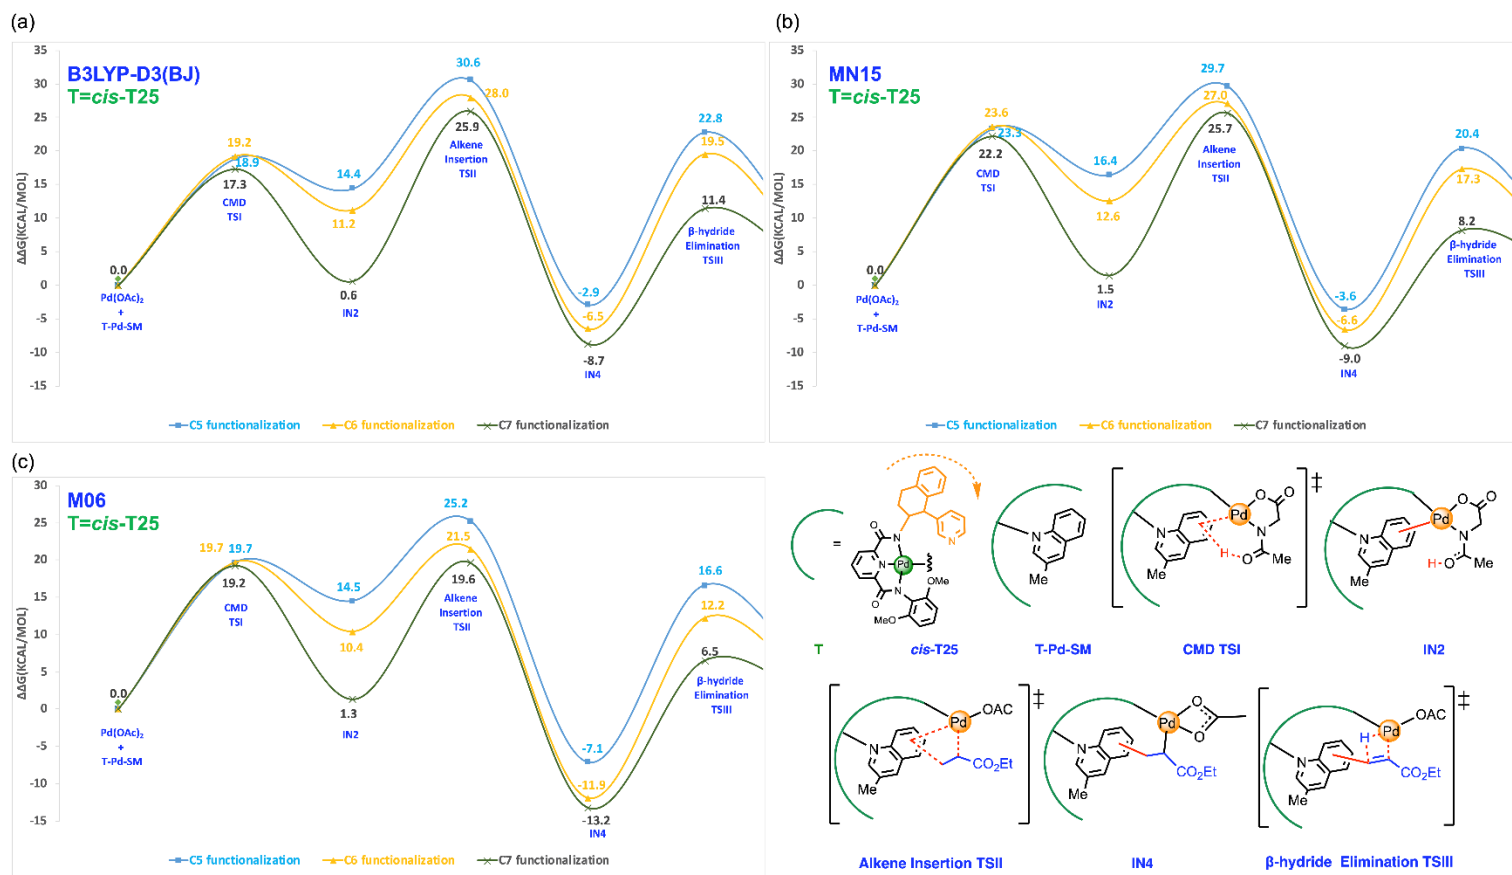

**Figure S11A.** Free energy profiles with template *cis*-T25 for C7 selective C–H olefination reactions of 3-methylquinoline under the level of (a) B3LYP-D3(BJ), (b) MN15, (c) M06 /6-311++G(d,p), SDD(Pd), SMD(Eps=16.7, EpsInf=1.625625) // PBE0-D3(BJ)//6-31G(d), LANL2DZ(Pd). All energies are in kcal/mol.

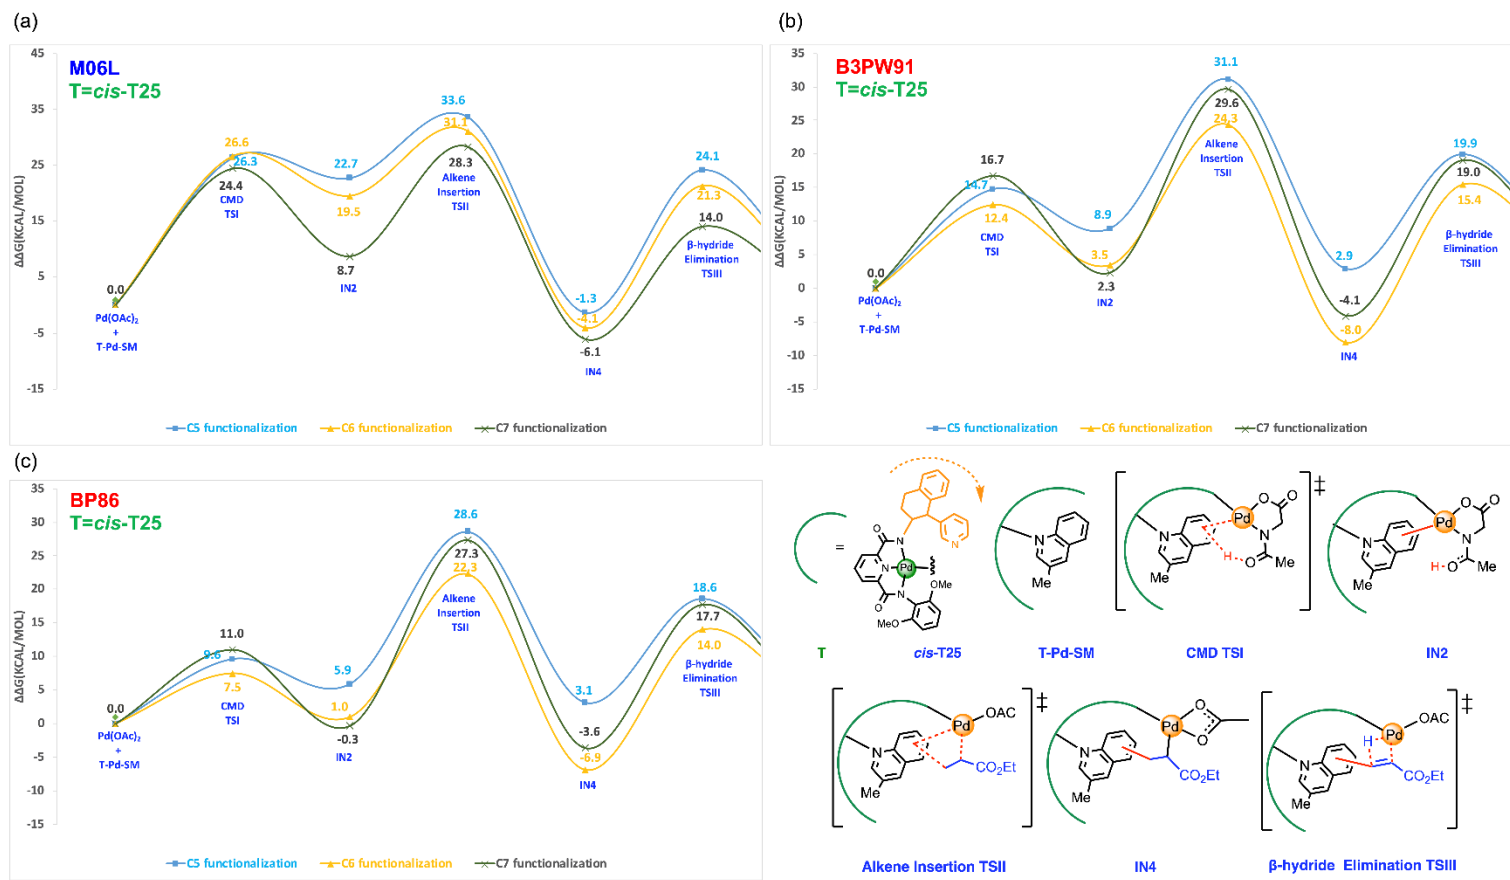

**Figure S11B.** Free energy profiles with template *cis*-T25 for C7 selective C–H olefination reactions of 3-methylquinoline under the level of (a) M06L, (b) B3PW91, (c) BP86 /6-311++G(d,p), SDD(Pd), SMD(Eps=16.7, EpsInf=1.625625) // PBE0-D3(BJ)//6-31G(d), LANL2DZ(Pd). All energies are in kcal/mol.

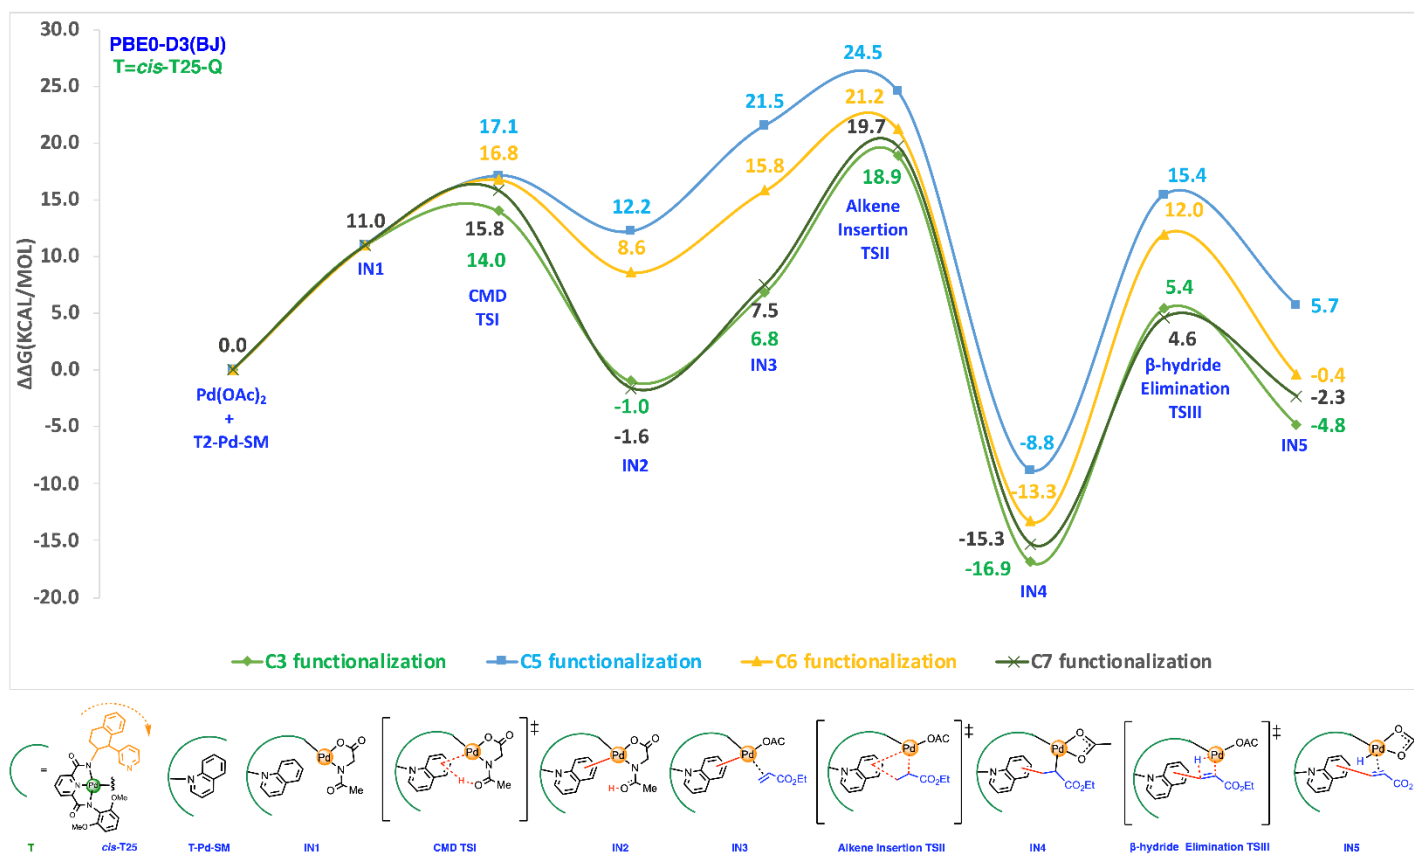

**Figure S12.** Free energy profiles with template *cis*-T25 for C7 selective C–H olefination reactions of quinoline under the level of PBE0-D3(BJ)/6-311++G(d,p), SDD(Pd), SMD(Eps=16.7, EpsInf=1.625625) //PBE0-D3(BJ)//6-31G(d), LANL2DZ(Pd). All energies are in kcal/mol.



**Table S10.** Distortion analysis for C6 selective C–H olefination of quinoline with template **T12**.

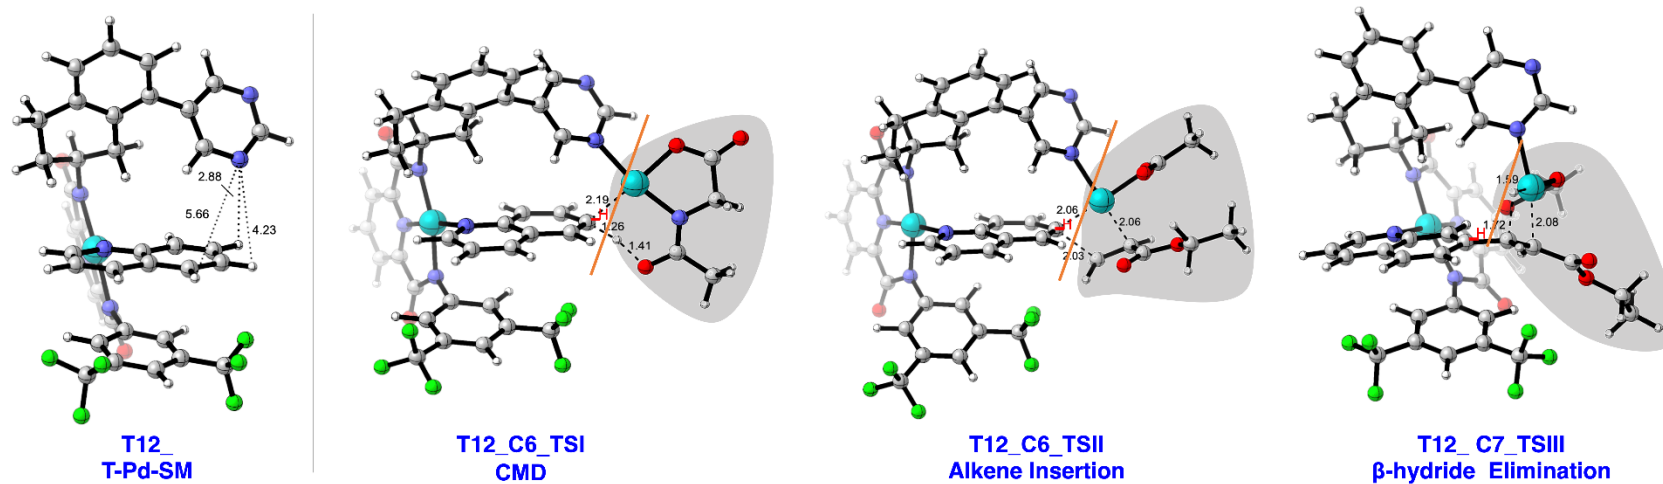

|             | E(distortion)<br>TSI | E(distortion)<br>TSII | E(distortion)<br>TSIII |
|-------------|----------------------|-----------------------|------------------------|
| T12_T-Pd-SM | 0.0                  | 0.0                   | 0.0                    |
| T12_C7_TS   | 2.4                  | 1.8                   | 3.4                    |
| T12_C6_TS   | 4.4                  | 3.4                   | 3.1                    |
| T12_C5_TS   | 4.9                  | 4.9                   | 3.9                    |

**Table S11.** Distortion analysis for C7 selective C–H olefination of 3-methylquinoline with template *cis*-T25.

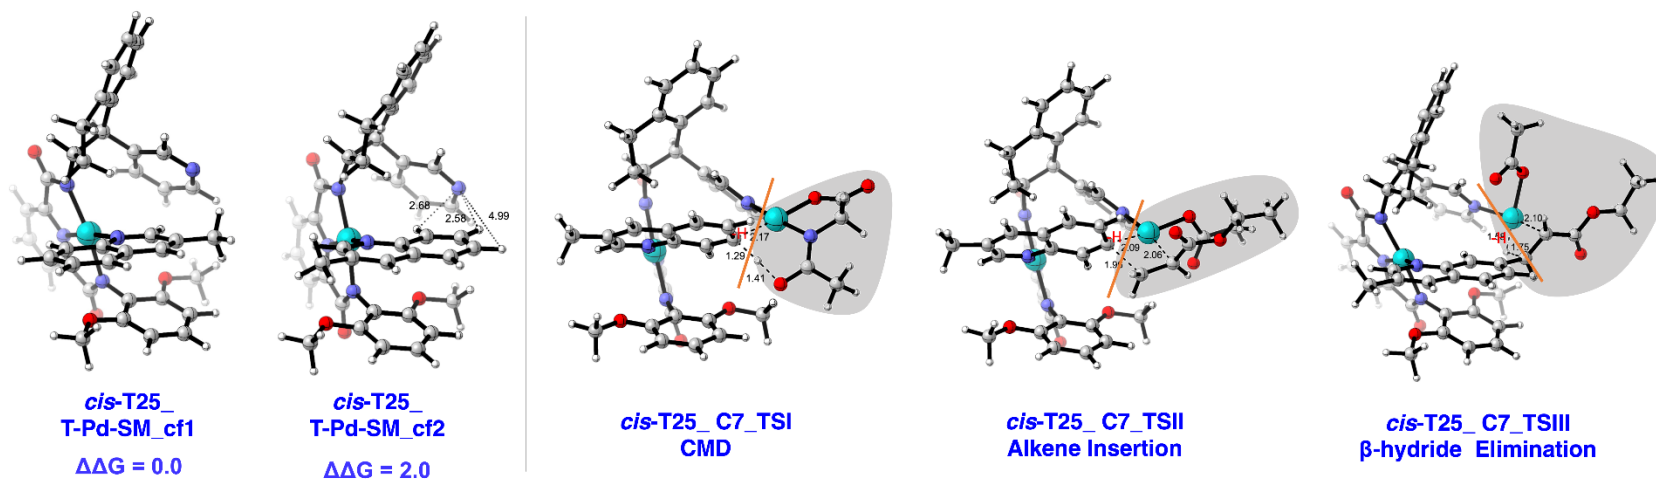

|                         | E(distortion)<br>TSI | E(distortion)<br>TSII | E(distortion)<br>TSIII |
|-------------------------|----------------------|-----------------------|------------------------|
| <i>cis</i> -T25_T-Pd-SM | 0.0                  | 0.0                   | 0.0                    |
| <i>cis</i> -T25_C7_TS   | 7.4                  | 9.7                   | 6.9                    |
| <i>cis</i> -T25_C6_TS   | 10.8                 | 12.3                  | 9.9                    |
| <i>cis</i> -T25_C5_TS   | 12.6                 | 15.8                  | 11.0                   |

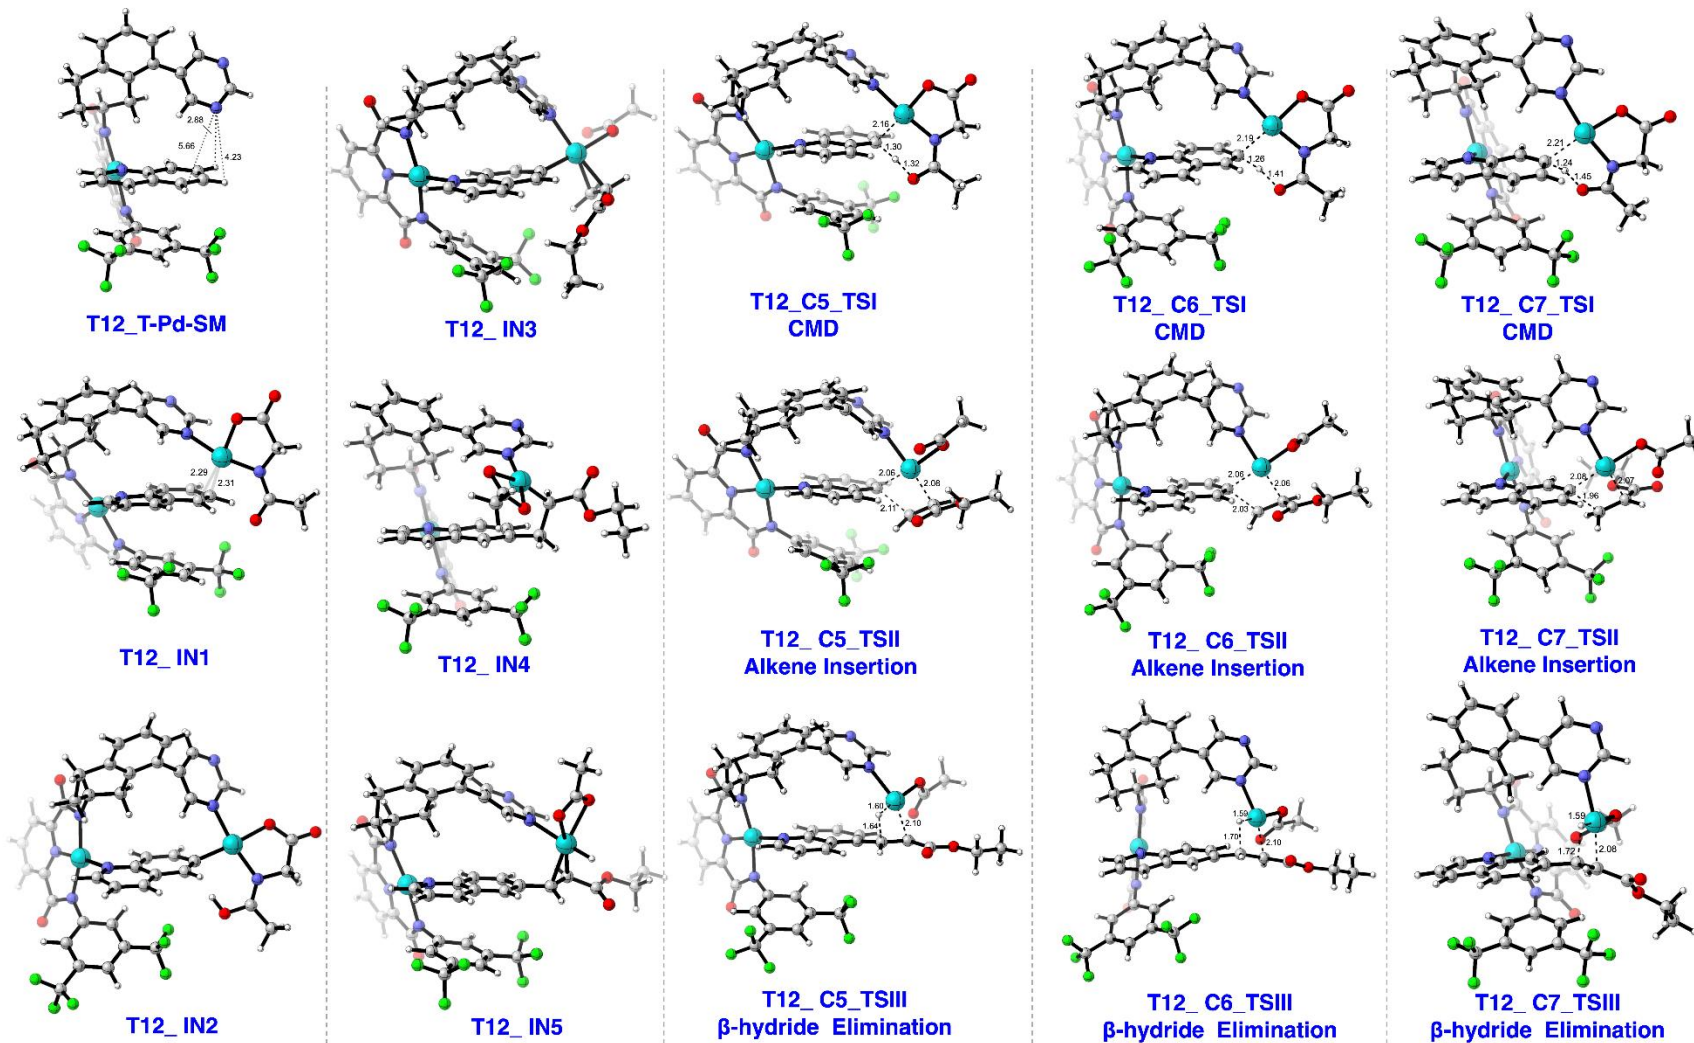

**Figure S13.** Optimization structures for C6 selective C–H olefination of quinoline with template **T12**.

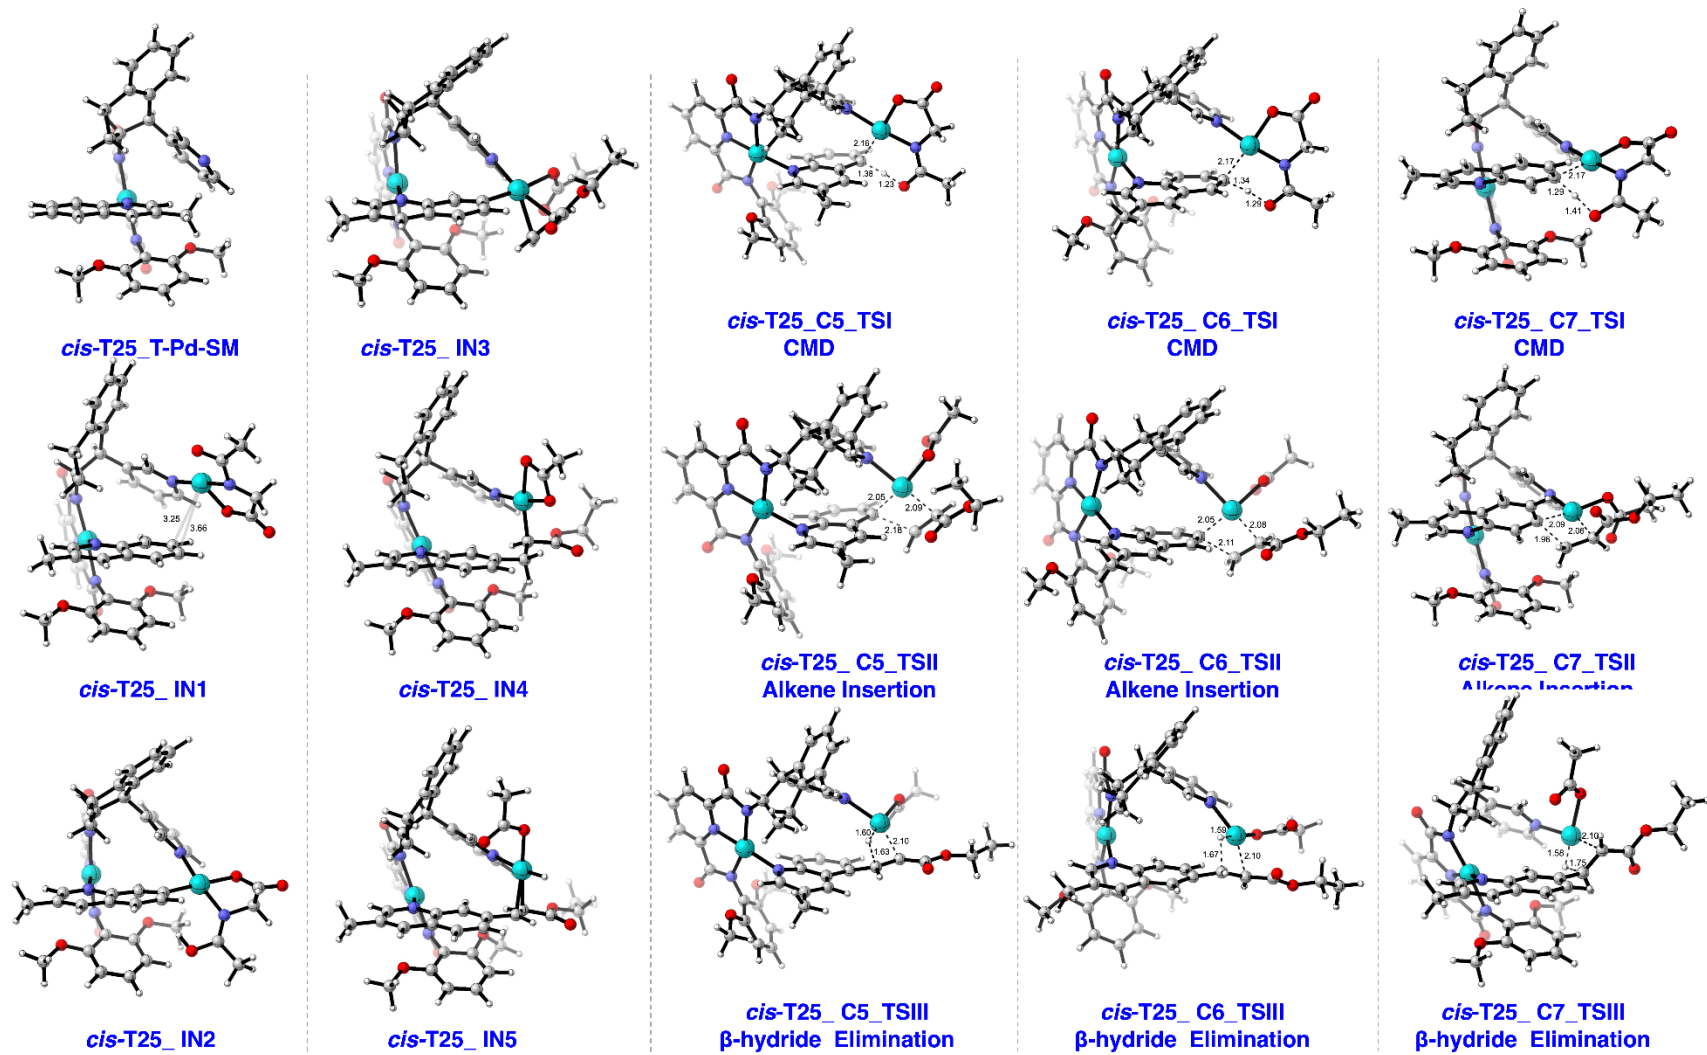

**Figure S14.** Optimization structures for C7 selective C–H olefination of 3-methylquinoline with template *cis*-T25.

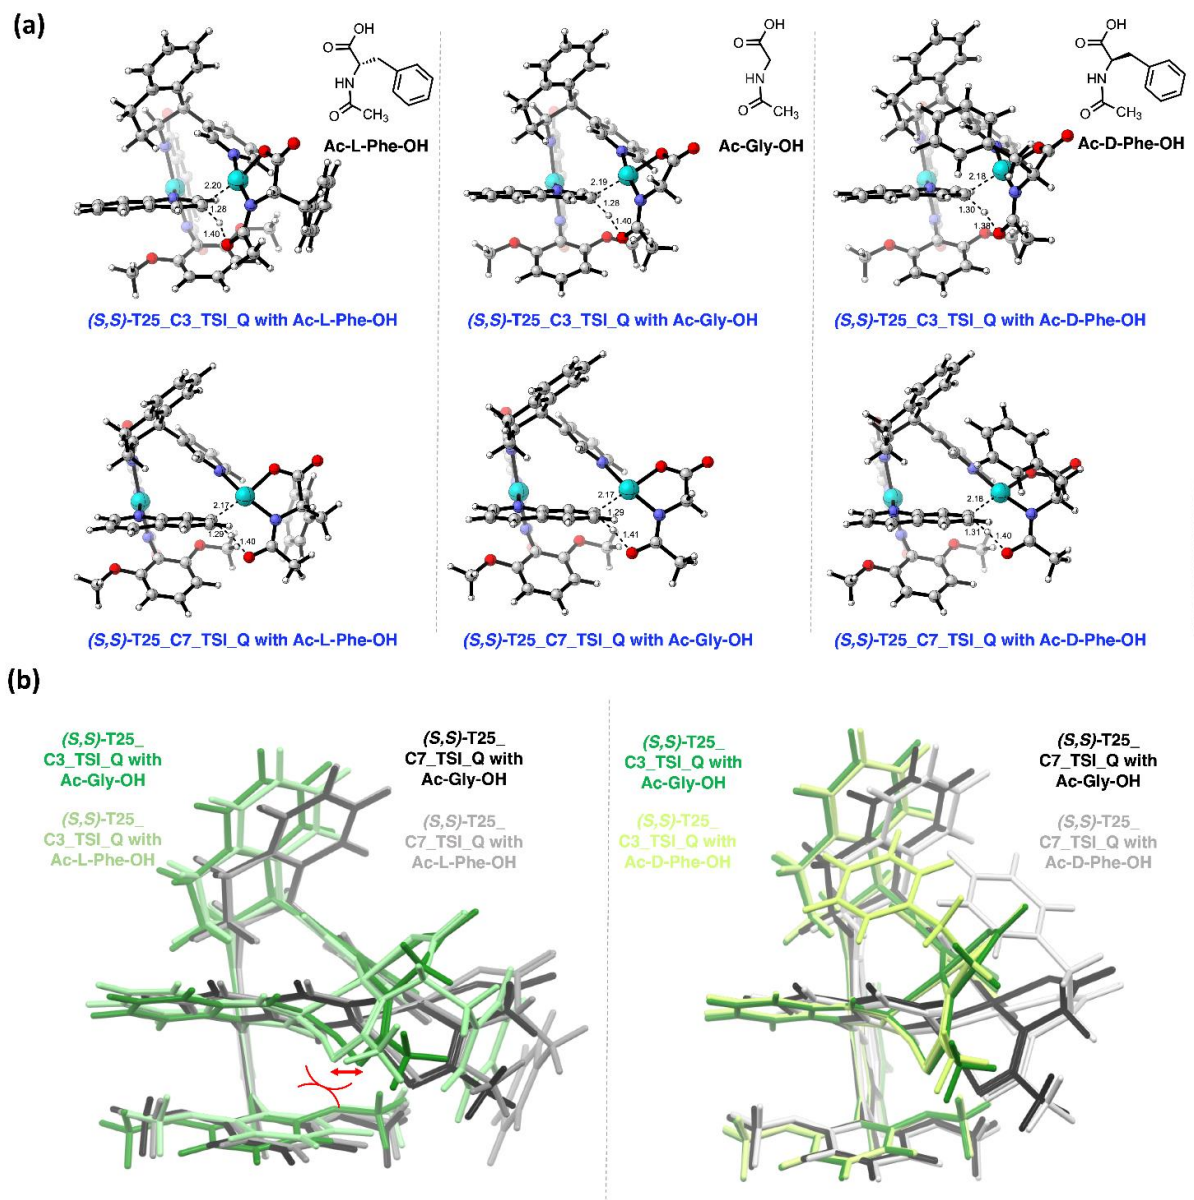

**Figure S15.** (a) Optimization structures for C7 selective C–H olefination reactions of quinoline with (*S,S*)-**T25** and different ligands. (b) Overlay of the CMD TS with different ligands. Distances are in Å.

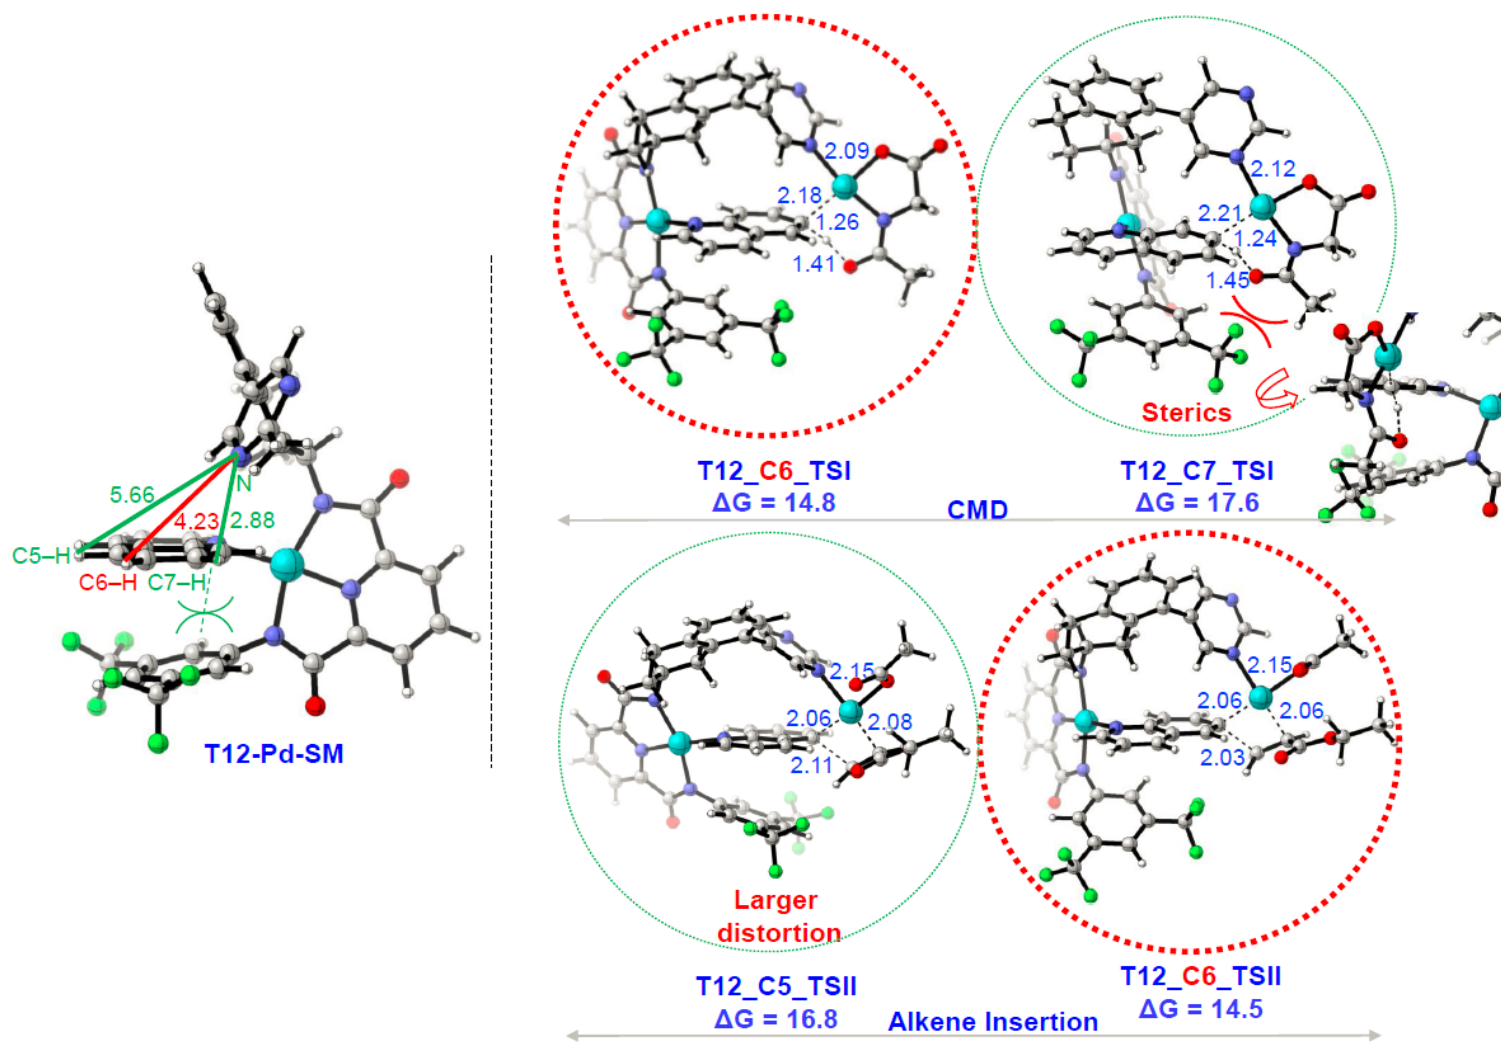

**Figure S16.** DFT analysis rationalizes the observed C6 selectivity for template **T12**. Bond lengths are denoted in Å.

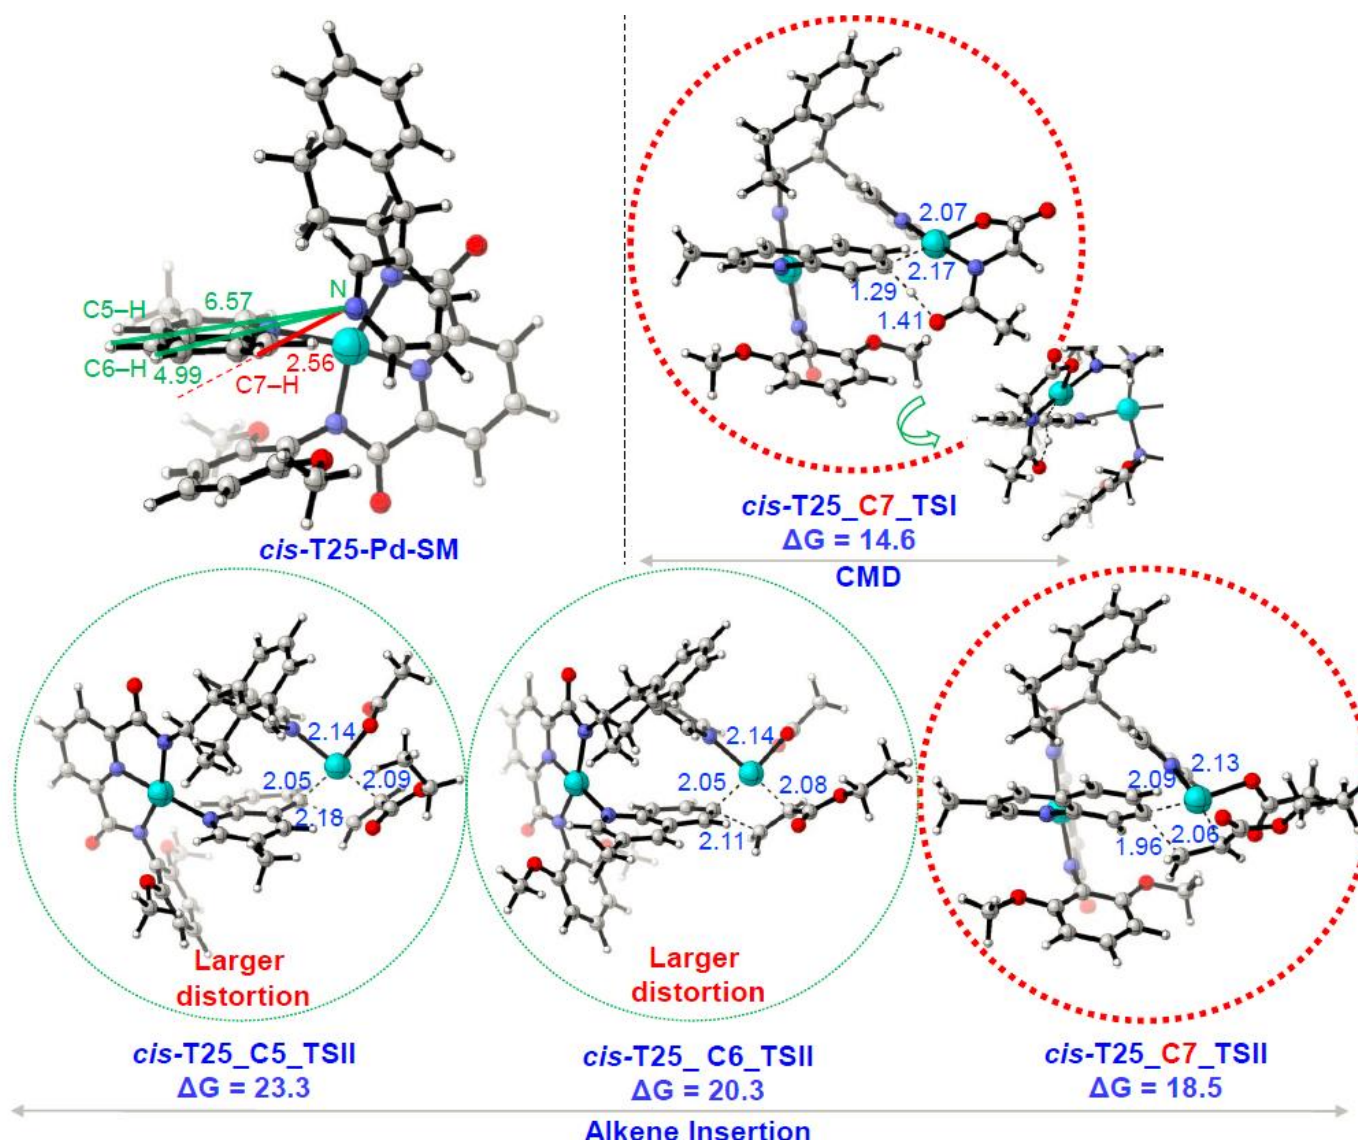

**Figure S17.** DFT analysis rationalizes the observed C7 selectivity for template *cis*-T25. Bond lengths are denoted in Å.

**Table S12. Energies.**

| PBE0-D3(BJ)    | E_SPC(PBE0-D3(BJ)) | E            | ZPE      | H_SPC        | qh-H_SPC     | T.S      | T.qh-S   | G(T)_SPC     | qh-G(T)_SPC  |
|----------------|--------------------|--------------|----------|--------------|--------------|----------|----------|--------------|--------------|
| ACOH           | -228.920327        | -228.832855  | 0.062677 | -228.850091  | -228.850552  | 0.043143 | 0.042651 | -228.893234  | -228.893202  |
| Ac-Gly-OH      | -436.779873        | -436.622905  | 0.118963 | -436.646938  | -436.648782  | 0.061734 | 0.058968 | -436.708672  | -436.707750  |
| CH2CHCO2Et     | -345.506216        | -345.396184  | 0.125336 | -345.368329  | -345.369368  | 0.056009 | 0.054949 | -345.424338  | -345.424317  |
| Cat_3Pd        | -1753.704252       | -1749.766534 | 0.319246 | -1753.334692 | -1753.344552 | 0.154946 | 0.138651 | -1753.489638 | -1753.483203 |
| quinoline      | -401.585260        | -401.474621  | 0.137194 | -401.436462  | -401.436591  | 0.052910 | 0.052888 | -401.489372  | -401.489479  |
| T12_IN1        | -3231.292812       | -3228.072922 | 0.687108 | -3230.524805 | -3230.537446 | 0.210999 | 0.192326 | -3230.735804 | -3230.729772 |
| T12_C5_IN2     | -3231.300112       | -3228.077183 | 0.687369 | -3230.531892 | -3230.544580 | 0.211396 | 0.192359 | -3230.743288 | -3230.736939 |
| T12_C5_IN3     | -3368.954828       | -3365.707167 | 0.758301 | -3368.108132 | -3368.123216 | 0.229853 | 0.207416 | -3368.337986 | -3368.330632 |
| T12_C5_IN4     | -3368.994036       | -3365.751311 | 0.760649 | -3368.146028 | -3368.160888 | 0.227456 | 0.205398 | -3368.373483 | -3368.366286 |
| T12_C5_IN5     | -3368.970897       | -3365.715238 | 0.757000 | -3368.125804 | -3368.141146 | 0.231836 | 0.208038 | -3368.357640 | -3368.349184 |
| T12_C6_IN2     | -3231.301852       | -3228.078046 | 0.687647 | -3230.533163 | -3230.546015 | 0.214005 | 0.193745 | -3230.747168 | -3230.739759 |
| T12_C6_IN3     | -3368.964952       | -3365.716204 | 0.758838 | -3368.117931 | -3368.132802 | 0.227813 | 0.206635 | -3368.345744 | -3368.339437 |
| T12_C6_IN4     | -3368.998780       | -3365.752965 | 0.760638 | -3368.150661 | -3368.165719 | 0.229221 | 0.206265 | -3368.379882 | -3368.371983 |
| T12_C6_IN5     | -3368.980417       | -3365.720662 | 0.757053 | -3368.135460 | -3368.150334 | 0.229356 | 0.206921 | -3368.364817 | -3368.357255 |
| T12_C7_IN2     | -3231.307124       | -3228.087850 | 0.688587 | -3230.537954 | -3230.550233 | 0.209311 | 0.191447 | -3230.747265 | -3230.741680 |
| T12_C7_IN3     | -3368.969162       | -3365.719186 | 0.759301 | -3368.121883 | -3368.136532 | 0.227909 | 0.206344 | -3368.349791 | -3368.342876 |
| T12_C7_IN4     | -3369.000785       | -3365.755616 | 0.760735 | -3368.152652 | -3368.167356 | 0.227436 | 0.205576 | -3368.380087 | -3368.372932 |
| T12_C7_IN5     | -3368.978138       | -3365.721229 | 0.756973 | -3368.133195 | -3368.148262 | 0.231452 | 0.207759 | -3368.364647 | -3368.356021 |
| T12_C5_TSI     | -3231.279146       | -3228.061730 | 0.682067 | -3230.516746 | -3230.529238 | 0.208206 | 0.190556 | -3230.724952 | -3230.719793 |
| T12_C6_TSI     | -3231.274664       | -3228.052882 | 0.681960 | -3230.512094 | -3230.524882 | 0.212308 | 0.192562 | -3230.724402 | -3230.717444 |
| T12_C7_TSI     | -3231.274174       | -3228.058521 | 0.683128 | -3230.510988 | -3230.523212 | 0.206616 | 0.189805 | -3230.717604 | -3230.713017 |
| T12_C5_TSII    | -3368.951978       | -3365.708411 | 0.758538 | -3368.106451 | -3368.120445 | 0.222767 | 0.203586 | -3368.329218 | -3368.324031 |
| T12_C6_TSII    | -3368.951406       | -3365.700172 | 0.757798 | -3368.106039 | -3368.120643 | 0.229627 | 0.207056 | -3368.335667 | -3368.327700 |
| T12_C7_TSII    | -3368.955668       | -3365.704102 | 0.758869 | -3368.109714 | -3368.123943 | 0.224280 | 0.204158 | -3368.333995 | -3368.328100 |
| T12_C5_TSIII   | -3368.956809       | -3365.695581 | 0.754978 | -3368.114038 | -3368.129361 | 0.231948 | 0.207791 | -3368.345986 | -3368.337152 |
| T12_C6_TSIII   | -3368.966586       | -3365.705527 | 0.754976 | -3368.123858 | -3368.139105 | 0.232140 | 0.207914 | -3368.355998 | -3368.347019 |
| T12_C7_TSIII   | -3368.974464       | -3365.725120 | 0.755940 | -3368.131417 | -3368.146115 | 0.224474 | 0.203936 | -3368.355890 | -3368.350050 |
| T12_T-Pd-SM    | -2667.805414       | -2665.898391 | 0.588081 | -2667.150928 | -2667.161384 | 0.179779 | 0.164030 | -2667.330708 | -2667.325413 |
| TC-Pd-SM       | -2922.638832       | -2920.631879 | 0.444992 | -2922.129133 | -2922.139889 | 0.182231 | 0.163662 | -2922.311364 | -2922.303552 |
| cis-T25_C5_IN2 | -2809.729384       | -2806.643600 | 0.783468 | -2808.865400 | -2808.878003 | 0.208373 | 0.190586 | -2809.073773 | -2809.068589 |
| cis-T25_C5_IN3 | -2947.387594       | -2944.280624 | 0.855184 | -2946.444775 | -2946.458781 | 0.223262 | 0.204510 | -2946.668037 | -2946.663291 |
| cis-T25_C5_IN4 | -2947.439132       | -2944.334563 | 0.857581 | -2946.494832 | -2946.508979 | 0.222841 | 0.202920 | -2946.717672 | -2946.711899 |
| cis-T25_C5_IN5 | -2947.409871       | -2944.296462 | 0.854023 | -2946.468606 | -2946.482839 | 0.223468 | 0.204079 | -2946.692074 | -2946.686919 |
| cis-T25_C6_IN2 | -2809.734671       | -2806.648643 | 0.783750 | -2808.870295 | -2808.882877 | 0.209718 | 0.191270 | -2809.080013 | -2809.074146 |



|                  |              |              |          |              |              |          |          |              |              |
|------------------|--------------|--------------|----------|--------------|--------------|----------|----------|--------------|--------------|
| cis-T25_C6_IN3   | -2947.394569 | -2944.281548 | 0.854924 | -2946.451684 | -2946.466515 | 0.227010 | 0.205879 | -2946.678694 | -2946.672394 |
| cis-T25_C6_IN4   | -2947.442626 | -2944.331016 | 0.856674 | -2946.498651 | -2946.513602 | 0.228095 | 0.205386 | -2946.726746 | -2946.718988 |
| cis-T25_C6_IN5   | -2947.417920 | -2944.300487 | 0.853877 | -2946.476733 | -2946.491003 | 0.224539 | 0.204537 | -2946.701272 | -2946.695540 |
| cis-T25_C7_IN2   | -2809.753750 | -2806.672827 | 0.785025 | -2808.888650 | -2808.900636 | 0.204677 | 0.188752 | -2809.093326 | -2809.089388 |
| cis-T25_C7_IN3   | -2947.408388 | -2944.298882 | 0.855594 | -2946.464970 | -2946.479402 | 0.226153 | 0.205477 | -2946.691123 | -2946.684878 |
| cis-T25_C7_IN4   | -2947.448936 | -2944.343260 | 0.857611 | -2946.504604 | -2946.518908 | 0.222782 | 0.202682 | -2946.727386 | -2946.721590 |
| cis-T25_IN1      | -2809.726770 | -2806.650932 | 0.782554 | -2808.862844 | -2808.876394 | 0.214083 | 0.193693 | -2809.076927 | -2809.070087 |
| cis-T25_C5_TSI   | -2809.717630 | -2806.635928 | 0.778464 | -2808.859102 | -2808.871526 | 0.206844 | 0.189548 | -2809.065946 | -2809.061074 |
| cis-T25_C6_TSI   | -2809.717635 | -2806.633599 | 0.778489 | -2808.859104 | -2808.871501 | 0.207117 | 0.189630 | -2809.066220 | -2809.061131 |
| cis-T25_C7_TSI   | -2809.721467 | -2806.642501 | 0.779112 | -2808.862621 | -2808.874658 | 0.204498 | 0.188271 | -2809.067119 | -2809.062929 |
| cis-T25_C5_TSHI  | -2947.382109 | -2944.272220 | 0.854588 | -2946.440543 | -2946.454967 | 0.224487 | 0.203847 | -2946.665030 | -2946.658814 |
| cis-T25_C6_TSHI  | -2947.385190 | -2944.272148 | 0.854191 | -2946.443752 | -2946.458471 | 0.227232 | 0.205203 | -2946.670984 | -2946.663674 |
| cis-T25_C7_TSHI  | -2947.390264 | -2944.282757 | 0.854633 | -2946.448643 | -2946.462980 | 0.223102 | 0.203461 | -2946.671744 | -2946.666441 |
| cis-T25_C5_TSHI  | -2947.393159 | -2944.274561 | 0.851695 | -2946.454257 | -2946.469138 | 0.225310 | 0.204374 | -2946.679567 | -2946.673511 |
| cis-T25_C6_TSHI  | -2947.398282 | -2944.278533 | 0.851441 | -2946.459675 | -2946.474191 | 0.225442 | 0.204550 | -2946.685117 | -2946.678741 |
| cis-T25_C7_TSHI  | -2947.411648 | -2944.297196 | 0.851985 | -2946.472823 | -2946.487058 | 0.222883 | 0.203194 | -2946.695706 | -2946.690252 |
| cis-T25_T-Pd-SM  | -2246.251406 | -2244.487608 | 0.684997 | -2245.500898 | -2245.510333 | 0.172373 | 0.160117 | -2245.673271 | -2245.670450 |
| cis-T25-Q_C3_IN2 | -2770.467462 | -2767.395330 | 0.756934 | -2769.632808 | -2769.644624 | 0.201145 | 0.184658 | -2769.833954 | -2769.829282 |
| cis-T25-Q_C3_IN3 | -2908.127754 | -2905.031449 | 0.828156 | -2907.214777 | -2907.228418 | 0.215960 | 0.198275 | -2907.430736 | -2907.426693 |
| cis-T25-Q_C3_IN4 | -2908.166821 | -2905.072899 | 0.829780 | -2907.252777 | -2907.266564 | 0.217062 | 0.197861 | -2907.469839 | -2907.464425 |
| cis-T25-Q_C3_IN5 | -2908.144831 | -2905.040955 | 0.826655 | -2907.233747 | -2907.247320 | 0.215979 | 0.197867 | -2907.449726 | -2907.445187 |
| cis-T25-Q_C5_IN2 | -2770.444806 | -2767.369346 | 0.755788 | -2769.611159 | -2769.622973 | 0.202205 | 0.185364 | -2769.813364 | -2769.808336 |
| cis-T25-Q_C5_IN3 | -2908.103017 | -2905.005521 | 0.827385 | -2907.190612 | -2907.203944 | 0.217493 | 0.199406 | -2907.408106 | -2907.403350 |
| cis-T25-Q_C5_IN4 | -2908.153403 | -2905.057991 | 0.829646 | -2907.239511 | -2907.253286 | 0.217878 | 0.198203 | -2907.457390 | -2907.451489 |
| cis-T25-Q_C5_IN5 | -2908.126842 | -2905.020660 | 0.826265 | -2907.215982 | -2907.229518 | 0.217688 | 0.198944 | -2907.433669 | -2907.428461 |
| cis-T25-Q_C6_IN2 | -2770.450490 | -2767.374937 | 0.756155 | -2769.616414 | -2769.628205 | 0.203085 | 0.185783 | -2769.819499 | -2769.813988 |
| cis-T25-         | -2908.110282 | -2905.007837 | 0.827285 | -2907.197731 | -2907.211764 | 0.220628 | 0.200535 | -2907.418359 | -2907.412299 |

|                              |                |              |          |              |              |          |          |              |              |
|------------------------------|----------------|--------------|----------|--------------|--------------|----------|----------|--------------|--------------|
| <b>Q_C6_IN3</b>              |                |              |          |              |              |          |          |              |              |
| <b>cis-T25-Q_C6_IN4</b>      | -2908.158632   | -2905.057606 | 0.829089 | -2907.244996 | -2907.259075 | 0.220856 | 0.199650 | -2907.465852 | -2907.458725 |
| <b>cis-T25-Q_C6_IN5</b>      | -2908.135737   | -2905.025296 | 0.826033 | -2907.224987 | -2907.238672 | 0.219290 | 0.199546 | -2907.444276 | -2907.438218 |
| <b>cis-T25-Q_C7_IN2</b>      | -2770.470049   | -2767.399603 | 0.757222 | -2769.635371 | -2769.646633 | 0.198702 | 0.183614 | -2769.834074 | -2769.830247 |
| <b>cis-T25-Q_C7_IN3</b>      | -2908.124764   | -2905.025660 | 0.827881 | -2907.211718 | -2907.225403 | 0.219828 | 0.200152 | -2907.431546 | -2907.425555 |
| <b>cis-T25-Q_C7_IN4</b>      | -2908.165037   | -2905.069913 | 0.829999 | -2907.251009 | -2907.264509 | 0.216416 | 0.197368 | -2907.467425 | -2907.461877 |
| <b>cis-T25-Q_C7_IN5</b>      | -2908.139572   | -2905.034747 | 0.826261 | -2907.228631 | -2907.242286 | 0.217866 | 0.198927 | -2907.446497 | -2907.441213 |
| <b>cis-T25-Q_IN1</b>         | -2770.442759   | -2767.377805 | 0.754835 | -2769.609223 | -2769.622037 | 0.207368 | 0.188198 | -2769.816591 | -2769.810235 |
| <b>cis-T25-Q_C3_TSI</b>      | -2770.437475   | -2767.367396 | 0.751089 | -2769.608986 | -2769.620855 | 0.201660 | 0.184567 | -2769.810646 | -2769.805422 |
| <b>cis-T25-Q_C5_TSI</b>      | -2770.432807   | -2767.361484 | 0.750821 | -2769.604603 | -2769.616199 | 0.200504 | 0.184283 | -2769.805107 | -2769.800482 |
| <b>cis-T25-Q_C6_TSI</b>      | -2770.433260   | -2767.359693 | 0.750838 | -2769.605065 | -2769.616664 | 0.200702 | 0.184283 | -2769.805767 | -2769.800947 |
| <b>cis-T25-Q_C7_TSI</b>      | -2770.436862   | -2767.368540 | 0.751431 | -2769.608361 | -2769.619612 | 0.198186 | 0.182971 | -2769.806547 | -2769.802583 |
| <b>cis-T25-Q_C3_TSI</b>      | -2908.105664   | -2905.006829 | 0.826626 | -2907.194542 | -2907.208399 | 0.218841 | 0.199011 | -2907.413382 | -2907.407410 |
| <b>cis-T25-Q_C5_TSI</b>      | -2908.097385   | -2904.997429 | 0.826879 | -2907.186169 | -2907.199903 | 0.218484 | 0.198604 | -2907.404652 | -2907.398506 |
| <b>cis-T25-Q_C6_TSI</b>      | -2908.100957   | -2904.998305 | 0.826501 | -2907.189881 | -2907.203819 | 0.220855 | 0.199854 | -2907.410736 | -2907.403674 |
| <b>cis-T25-Q_C7_TSI</b>      | -2908.105851   | -2905.008989 | 0.827034 | -2907.194536 | -2907.208056 | 0.216613 | 0.198056 | -2907.411148 | -2907.406112 |
| <b>cis-T25-Q_C3_TSI</b>      | -2908.127670   | -2905.025424 | 0.824634 | -2907.219074 | -2907.232108 | 0.214035 | 0.196863 | -2907.433109 | -2907.428971 |
| <b>cis-T25-Q_C5_TSI</b>      | -2908.108528   | -2905.000322 | 0.824046 | -2907.199974 | -2907.214033 | 0.218828 | 0.198999 | -2907.418801 | -2907.413032 |
| <b>cis-T25-Q_C6_TSI</b>      | -2908.114120   | -2905.004845 | 0.823790 | -2907.205887 | -2907.219576 | 0.218399 | 0.198876 | -2907.424286 | -2907.418452 |
| <b>cis-T25-Q_C7_TSI</b>      | -2908.127627   | -2905.023813 | 0.824364 | -2907.219137 | -2907.232568 | 0.216144 | 0.197689 | -2907.435281 | -2907.430257 |
| <b>cis-T25-Q_T-Pd-SM_cf1</b> | -2206.966553   | -2205.209402 | 0.656725 | -2206.246566 | -2206.255924 | 0.168870 | 0.156132 | -2206.415436 | -2206.412055 |
| <b>cis-T25-Q_T-Pd-SM_cf2</b> | -2206.962936   | -2205.207361 | 0.656840 | -2206.242950 | -2206.252044 | 0.168106 | 0.155839 | -2206.411056 | -2206.407883 |
|                              |                |              |          |              |              |          |          |              |              |
| <b>WB97X-D</b>               | E_SPC(WB97X-D) | E            | ZPE      | H_SPC        | qh-H_SPC     | T.S      | T.qh-S   | G(T)_SPC     | qh-G(T)_SPC  |
| <b>AcOH</b>                  | -229.097639    | -228.832855  | 0.062677 | -229.027402  | -229.027863  | 0.043143 | 0.042651 | -229.070545  | -229.070514  |
| <b>Ac-Gly-OH</b>             | -437.115613    | -436.622905  | 0.118963 | -436.982678  | -436.984522  | 0.061734 | 0.058968 | -437.044412  | -437.043489  |
| <b>CH2CHCO2Et</b>            | -345.784031    | -345.396184  | 0.125336 | -345.646144  | -345.647183  | 0.056009 | 0.054949 | -345.702153  | -345.702133  |
| <b>Cat_3Pd</b>               | -1754.853578   | -1749.766534 | 0.319246 | -1754.484018 | -1754.493878 | 0.154946 | 0.138651 | -1754.638964 | -1754.632529 |

|                |              |              |          |              |              |          |          |              |              |
|----------------|--------------|--------------|----------|--------------|--------------|----------|----------|--------------|--------------|
| T12_IN1        | -3233.575486 | -3228.072922 | 0.687108 | -3232.807479 | -3232.820120 | 0.210999 | 0.192326 | -3233.018478 | -3233.012446 |
| T12_C5_IN2     | -3233.579782 | -3228.077183 | 0.687369 | -3232.811562 | -3232.824250 | 0.211396 | 0.192359 | -3233.022959 | -3233.016610 |
| T12_C5_IN3     | -3371.353254 | -3365.707167 | 0.758301 | -3370.506558 | -3370.521641 | 0.229853 | 0.207416 | -3370.736411 | -3370.729057 |
| T12_C5_IN4     | -3371.394620 | -3365.751311 | 0.760649 | -3370.546612 | -3370.561472 | 0.227456 | 0.205398 | -3370.774067 | -3370.766871 |
| T12_C5_IN5     | -3371.368578 | -3365.715238 | 0.757000 | -3370.523486 | -3370.538827 | 0.231836 | 0.208038 | -3370.755321 | -3370.746865 |
| T12_C6_IN2     | -3233.581309 | -3228.078046 | 0.687647 | -3232.812619 | -3232.825471 | 0.214005 | 0.193745 | -3233.026624 | -3233.019215 |
| T12_C6_IN3     | -3371.364083 | -3365.716204 | 0.758838 | -3370.517062 | -3370.531933 | 0.227813 | 0.206635 | -3370.744875 | -3370.738568 |
| T12_C6_IN4     | -3371.398688 | -3365.752965 | 0.760638 | -3370.550569 | -3370.565627 | 0.229221 | 0.206265 | -3370.779790 | -3370.771891 |
| T12_C6_IN5     | -3371.377898 | -3365.720662 | 0.757053 | -3370.532941 | -3370.547814 | 0.229356 | 0.206921 | -3370.762297 | -3370.754736 |
| T12_C7_IN2     | -3233.587199 | -3228.087850 | 0.688587 | -3232.818029 | -3232.830308 | 0.209311 | 0.191447 | -3233.027339 | -3233.021755 |
| T12_C7_IN3     | -3371.367141 | -3365.719186 | 0.759301 | -3370.519861 | -3370.534511 | 0.227909 | 0.206344 | -3370.747769 | -3370.740855 |
| T12_C7_IN4     | -3371.400611 | -3365.755616 | 0.760735 | -3370.552477 | -3370.567182 | 0.227436 | 0.205576 | -3370.779913 | -3370.772758 |
| T12_C7_IN5     | -3371.374180 | -3365.721229 | 0.756973 | -3370.529237 | -3370.544304 | 0.231452 | 0.207759 | -3370.760688 | -3370.752063 |
| T12_C5_TSI     | -3233.557898 | -3228.061730 | 0.682067 | -3232.795497 | -3232.807989 | 0.208206 | 0.190556 | -3233.003704 | -3232.998545 |
| T12_C6_TSI     | -3233.553508 | -3228.052882 | 0.681960 | -3232.790937 | -3232.803726 | 0.212308 | 0.192562 | -3233.003245 | -3232.996288 |
| T12_C7_TSI     | -3233.552672 | -3228.058521 | 0.683128 | -3232.789486 | -3232.801710 | 0.206616 | 0.189805 | -3232.996102 | -3232.991515 |
| T12_C5_TSH     | -3371.349915 | -3365.708411 | 0.758538 | -3370.504388 | -3370.518382 | 0.222767 | 0.203586 | -3370.727155 | -3370.721968 |
| T12_C6_TSH     | -3371.348764 | -3365.700172 | 0.757798 | -3370.503398 | -3370.518002 | 0.229627 | 0.207056 | -3370.733025 | -3370.725058 |
| T12_C7_TSH     | -3371.353684 | -3365.704102 | 0.758869 | -3370.507731 | -3370.521959 | 0.224280 | 0.204158 | -3370.732011 | -3370.726117 |
| T12_C5_TSH     | -3371.353786 | -3365.695581 | 0.754978 | -3370.511015 | -3370.526338 | 0.231948 | 0.207791 | -3370.742963 | -3370.734129 |
| T12_C6_TSH     | -3371.363478 | -3365.705527 | 0.754976 | -3370.520750 | -3370.535997 | 0.232140 | 0.207914 | -3370.752890 | -3370.743911 |
| T12_C7_TSH     | -3371.373834 | -3365.725120 | 0.755940 | -3370.530786 | -3370.545484 | 0.224474 | 0.203936 | -3370.755260 | -3370.749419 |
| T12_TC-Pd-S    | -2924.674614 | -2920.631879 | 0.444992 | -2924.164915 | -2924.175671 | 0.182231 | 0.163662 | -2924.347146 | -2924.339334 |
| T12_T-Pd-SM    | -2669.727864 | -2665.898391 | 0.588081 | -2669.073378 | -2669.083833 | 0.179779 | 0.164030 | -2669.253157 | -2669.247863 |
| cis-T25_C5_IN2 | -2811.764817 | -2806.643600 | 0.783468 | -2810.900833 | -2810.913436 | 0.208373 | 0.190586 | -2811.109206 | -2811.104022 |
| cis-T25_C5_IN3 | -2949.542710 | -2944.280624 | 0.855184 | -2948.599891 | -2948.613897 | 0.223262 | 0.204510 | -2948.823153 | -2948.818408 |
| cis-T25_C5_IN4 | -2949.595322 | -2944.334563 | 0.857581 | -2948.651021 | -2948.665168 | 0.222841 | 0.202920 | -2948.873862 | -2948.868089 |
| cis-T25_C5_IN5 | -2949.564076 | -2944.296462 | 0.854023 | -2948.622811 | -2948.637044 | 0.223468 | 0.204079 | -2948.846279 | -2948.841124 |
| cis-T25_C6_IN2 | -2811.770624 | -2806.648643 | 0.783750 | -2810.906247 | -2810.918829 | 0.209718 | 0.191270 | -2811.115965 | -2811.110099 |
| cis-T25_C6_IN3 | -2949.549519 | -2944.281548 | 0.854924 | -2948.606634 | -2948.621465 | 0.227010 | 0.205879 | -2948.833644 | -2948.827344 |
| cis-T25_C6_IN4 | -2949.598843 | -2944.331016 | 0.856674 | -2948.654867 | -2948.669818 | 0.228095 | 0.205386 | -2948.882962 | -2948.875205 |
| cis-T25_C6_IN5 | -2949.570548 | -2944.300487 | 0.853877 | -2948.629362 | -2948.643631 | 0.224539 | 0.204537 | -2948.853901 | -2948.848168 |
| cis-T25_C7_IN2 | -2811.791409 | -2806.672827 | 0.785025 | -2810.926309 | -2810.938295 | 0.204677 | 0.188752 | -2811.130985 | -2811.127047 |
| cis-T25_C7_IN3 | -2949.564726 | -2944.298882 | 0.855594 | -2948.621308 | -2948.635740 | 0.226153 | 0.205477 | -2948.847461 | -2948.841216 |
| cis-           | -2949.606554 | -2944.343260 | 0.857611 | -2948.662222 | -2948.676526 | 0.222782 | 0.202682 | -2948.885004 | -2948.879208 |

|                         |              |              |          |              |              |          |          |              |              |
|-------------------------|--------------|--------------|----------|--------------|--------------|----------|----------|--------------|--------------|
| <b>T25_C7_IN4</b>       |              |              |          |              |              |          |          |              |              |
| <b>cis-T25_C7_IN5</b>   | -2949.578565 | -2944.309232 | 0.853838 | -2948.637282 | -2948.651691 | 0.223835 | 0.204326 | -2948.861117 | -2948.856018 |
| <b>cis-T25_IN1</b>      | -2811.769171 | -2806.650932 | 0.782554 | -2810.905246 | -2810.918795 | 0.214083 | 0.193693 | -2811.119328 | -2811.112488 |
| <b>cis-T25_C5_TSI</b>   | -2811.751840 | -2806.635928 | 0.778464 | -2810.893312 | -2810.905736 | 0.206844 | 0.189548 | -2811.100157 | -2811.095285 |
| <b>cis-T25_C6_TSI</b>   | -2811.752021 | -2806.633599 | 0.778489 | -2810.893490 | -2810.905887 | 0.207117 | 0.189630 | -2811.100607 | -2811.095517 |
| <b>cis-T25_C7_TSI</b>   | -2811.756111 | -2806.642501 | 0.779112 | -2810.897265 | -2810.909302 | 0.204498 | 0.188271 | -2811.101763 | -2811.097573 |
| <b>cis-T25_C5_TSHI</b>  | -2949.535141 | -2944.272220 | 0.854588 | -2948.593574 | -2948.607998 | 0.224487 | 0.203847 | -2948.818061 | -2948.811845 |
| <b>cis-T25_C6_TSHI</b>  | -2949.538198 | -2944.272148 | 0.854191 | -2948.596760 | -2948.611479 | 0.227232 | 0.205203 | -2948.823993 | -2948.816682 |
| <b>cis-T25_C7_TSHI</b>  | -2949.544524 | -2944.282757 | 0.854633 | -2948.602903 | -2948.617240 | 0.223102 | 0.203461 | -2948.826004 | -2948.820701 |
| <b>cis-T25_C5_TSHII</b> | -2949.546660 | -2944.274561 | 0.851695 | -2948.607757 | -2948.622638 | 0.225310 | 0.204374 | -2948.833068 | -2948.827012 |
| <b>cis-T25_C6_TSHII</b> | -2949.551772 | -2944.278533 | 0.851441 | -2948.613165 | -2948.627681 | 0.225442 | 0.204550 | -2948.838607 | -2948.832230 |
| <b>cis-T25_C7_TSHII</b> | -2949.568440 | -2944.297196 | 0.851985 | -2948.629615 | -2948.643850 | 0.222883 | 0.203194 | -2948.852498 | -2948.847044 |
| <b>cis-T25_T-Pd-SM</b>  | -2247.930790 | -2244.487608 | 0.684997 | -2247.180282 | -2247.189716 | 0.172373 | 0.160117 | -2247.352655 | -2247.349833 |
|                         |              |              |          |              |              |          |          |              |              |
|                         |              |              |          |              |              |          |          |              |              |
| <b>M06//B3LYP-D3</b>    | E_SPC(M06)   | E(B3LYP-D3)  | ZPE      | H_SPC        | qh-H_SPC     | T.S      | T.qh-S   | G(T)_SPC     | qh-G(T)_SPC  |
| <b>ACOH</b>             | -229.041568  | -229.084786  | 0.062061 | -228.971937  | -228.972343  | 0.043069 | 0.042682 | -229.015006  | -229.015025  |
| <b>Ac-Gly-OH</b>        | -437.000550  | -437.101405  | 0.117671 | -436.868778  | -436.870666  | 0.062233 | 0.059279 | -436.931010  | -436.929945  |
| <b>CH2CHCO2Et</b>       | -345.671586  | -345.795597  | 0.124421 | -345.534603  | -345.535622  | 0.055958 | 0.054959 | -345.590561  | -345.590581  |
| <b>Cat_3Pd</b>          | -1754.470299 | -1751.367791 | 0.315875 | -1754.103668 | -1754.113733 | 0.155727 | 0.139423 | -1754.259395 | -1754.253156 |
| <b>T12_IN1</b>          | -3232.650724 | -3231.326625 | 0.680444 | -3231.888705 | -3231.901442 | 0.212576 | 0.193742 | -3232.101281 | -3232.095184 |
| <b>T12_C5_IN2</b>       | -3232.655013 | -3231.327995 | 0.680807 | -3231.892873 | -3231.905424 | 0.210853 | 0.192670 | -3232.103726 | -3232.098094 |
| <b>T12_C5_IN3</b>       | -3370.379442 | -3369.128313 | 0.751589 | -3369.539068 | -3369.553875 | 0.228549 | 0.207466 | -3369.767617 | -3369.761342 |
| <b>T12_C5_IN4</b>       | -3370.416951 | -3369.169296 | 0.754084 | -3369.575137 | -3369.589957 | 0.227905 | 0.205951 | -3369.803042 | -3369.795908 |
| <b>T12_C5_IN5</b>       | -3370.391015 | -3369.134052 | 0.750089 | -3369.552229 | -3369.567687 | 0.232333 | 0.208891 | -3369.784563 | -3369.776578 |
| <b>T12_C6_IN2</b>       | -3232.658250 | -3231.328890 | 0.681114 | -3231.895560 | -3231.908402 | 0.214377 | 0.194461 | -3232.109936 | -3232.102862 |
| <b>T12_C6_IN3</b>       | -3370.387850 | -3369.139692 | 0.752392 | -3369.546937 | -3369.561521 | 0.226335 | 0.206518 | -3369.773273 | -3369.768039 |
| <b>T12_C6_IN4</b>       | -3370.420657 | -3369.170773 | 0.754112 | -3369.578737 | -3369.593735 | 0.228770 | 0.206362 | -3369.807507 | -3369.800097 |
| <b>T12_C6_IN5</b>       | -3370.398660 | -3369.139340 | 0.750063 | -3369.560110 | -3369.575036 | 0.230146 | 0.207893 | -3369.790255 | -3369.782929 |
| <b>T12_C7_IN2</b>       | -3232.662527 | -3231.341367 | 0.682150 | -3231.899314 | -3231.911424 | 0.209048 | 0.191863 | -3232.108362 | -3232.103288 |
| <b>T12_C7_IN3</b>       | -3370.390695 | -3369.142020 | 0.752748 | -3369.549470 | -3369.564067 | 0.227713 | 0.206868 | -3369.777183 | -3369.770935 |
| <b>T12_C7_IN4</b>       | -3370.422580 | -3369.174179 | 0.754196 | -3369.580615 | -3369.595263 | 0.227500 | 0.206007 | -3369.808115 | -3369.801270 |
| <b>T12_C7_IN5</b>       | -3370.396147 | -3369.140472 | 0.750150 | -3369.557577 | -3369.572530 | 0.230224 | 0.207778 | -3369.787801 | -3369.780308 |
| <b>T12_C5_TSI</b>       | -3232.633659 | -3231.313765 | 0.675467 | -3231.877375 | -3231.889751 | 0.208342 | 0.191153 | -3232.085717 | -3232.080903 |
| <b>T12_C6_TSI</b>       | -3232.628190 | -3231.310620 | 0.675894 | -3231.871607 | -3231.883786 | 0.208425 | 0.191210 | -3232.080031 | -3232.074996 |

|                  |              |              |          |              |              |          |          |              |              |
|------------------|--------------|--------------|----------|--------------|--------------|----------|----------|--------------|--------------|
| T12_C7_TSI       | -3232.627329 | -3231.312493 | 0.676310 | -3231.870409 | -3231.882476 | 0.207222 | 0.190741 | -3232.077631 | -3232.073217 |
| T12_C5_TSII      | -3370.376582 | -3369.128155 | 0.751867 | -3369.537310 | -3369.550997 | 0.222294 | 0.203971 | -3369.759603 | -3369.754969 |
| T12_C6_TSII      | -3370.377270 | -3369.119555 | 0.751394 | -3369.538017 | -3369.552254 | 0.228086 | 0.206815 | -3369.766103 | -3369.759069 |
| T12_C7_TSII      | -3370.380640 | -3369.125076 | 0.752340 | -3369.540775 | -3369.554838 | 0.223991 | 0.204624 | -3369.764767 | -3369.759462 |
| T12_C5_TSIII     | -3370.380138 | -3369.112421 | 0.748187 | -3369.543697 | -3369.558984 | 0.231817 | 0.208229 | -3369.775514 | -3369.767214 |
| T12_C6_TSIII     | -3370.390012 | -3369.121589 | 0.747995 | -3369.553716 | -3369.568951 | 0.233121 | 0.208963 | -3369.786837 | -3369.777913 |
| T12_C7_TSIII     | -3370.398412 | -3369.147010 | 0.749137 | -3369.561731 | -3369.576235 | 0.224414 | 0.204568 | -3369.786145 | -3369.780803 |
| T12_TC-Pd-SM     | -2924.008277 | -2923.533029 | 0.440083 | -2923.503127 | -2923.513777 | 0.181518 | 0.163750 | -2923.684645 | -2923.677527 |
| T12_T-Pd-SM      | -2668.932122 | -2668.651507 | 0.582670 | -2668.282725 | -2668.293063 | 0.179885 | 0.164459 | -2668.462611 | -2668.457522 |
| cis-T25_C5_IN2   | -2810.807437 | -2809.562966 | 0.776858 | -2809.949601 | -2809.962218 | 0.209174 | 0.191387 | -2810.158775 | -2810.153605 |
| cis-T25_C5_IN3   | -2948.536834 | -2947.371273 | 0.848309 | -2947.600430 | -2947.614287 | 0.223855 | 0.205276 | -2947.824285 | -2947.819562 |
| cis-T25_C5_IN4   | -2948.583747 | -2947.421600 | 0.851121 | -2947.645669 | -2947.659802 | 0.222996 | 0.203175 | -2947.868665 | -2947.862977 |
| cis-T25_C5_IN5   | -2948.555773 | -2947.388045 | 0.847236 | -2947.620854 | -2947.634824 | 0.223319 | 0.204642 | -2947.844173 | -2947.839466 |
| cis-T25_C6_IN2   | -2810.813973 | -2809.567623 | 0.777112 | -2809.955792 | -2809.968400 | 0.210066 | 0.191840 | -2810.165857 | -2810.160240 |
| cis-T25_C6_IN3   | -2948.541198 | -2947.371636 | 0.848017 | -2947.604757 | -2947.619596 | 0.227440 | 0.206541 | -2947.832197 | -2947.826137 |
| cis-T25_C6_IN4   | -2948.588308 | -2947.418057 | 0.850162 | -2947.650645 | -2947.665582 | 0.227652 | 0.205344 | -2947.878297 | -2947.870925 |
| cis-T25_C6_IN5   | -2948.560267 | -2947.387512 | 0.846760 | -2947.625654 | -2947.640013 | 0.225660 | 0.205637 | -2947.851314 | -2947.845650 |
| cis-T25_C7_IN2   | -2810.831456 | -2809.594161 | 0.778604 | -2809.972418 | -2809.984256 | 0.204857 | 0.189291 | -2810.177275 | -2810.173547 |
| cis-T25_C7_IN3   | -2948.555143 | -2947.391781 | 0.848820 | -2947.618067 | -2947.632425 | 0.226847 | 0.206319 | -2947.844914 | -2947.838744 |
| cis-T25_C7_IN4   | -2948.593905 | -2947.432146 | 0.851281 | -2947.655703 | -2947.669899 | 0.222689 | 0.202815 | -2947.878392 | -2947.872713 |
| cis-T25_C7_IN5   | -2948.567244 | -2947.402772 | 0.847051 | -2947.632337 | -2947.646591 | 0.224166 | 0.204946 | -2947.856503 | -2947.851538 |
| cis-T25_IN1      | -2810.808243 | -2809.577514 | 0.776240 | -2809.950352 | -2809.963807 | 0.214754 | 0.194262 | -2810.165106 | -2810.158069 |
| cis-T25_C5_TSI   | -2810.794864 | -2809.556105 | 0.771971 | -2809.942439 | -2809.954811 | 0.207233 | 0.190120 | -2810.149672 | -2810.144931 |
| cis-T25_C6_TSI   | -2810.795409 | -2809.553384 | 0.771884 | -2809.943049 | -2809.955448 | 0.207733 | 0.190326 | -2810.150782 | -2810.145774 |
| cis-T25_C7_TSI   | -2810.797570 | -2809.564316 | 0.772582 | -2809.944898 | -2809.956794 | 0.204496 | 0.188692 | -2810.149393 | -2810.145486 |
| cis-T25_C5_TSII  | -2948.527918 | -2947.359508 | 0.847639 | -2947.592892 | -2947.607148 | 0.224937 | 0.204606 | -2947.817829 | -2947.811754 |
| cis-T25_C6_TSII  | -2948.530731 | -2947.359435 | 0.847431 | -2947.595769 | -2947.610440 | 0.225379 | 0.204624 | -2947.821148 | -2947.815064 |
| cis-T25_C7_TSII  | -2948.538082 | -2947.371649 | 0.847881 | -2947.602825 | -2947.617060 | 0.223658 | 0.204168 | -2947.826483 | -2947.821227 |
| cis-T25_C5_TSIII | -2948.539361 | -2947.360140 | 0.844712 | -2947.607024 | -2947.621912 | 0.225773 | 0.205044 | -2947.832797 | -2947.826956 |
| cis-             | -2948.546372 | -2947.364122 | 0.844445 | -2947.614377 | -2947.628757 | 0.225426 | 0.205042 | -2947.839803 | -2947.833800 |

|                         |                     |              |              |              |               |              |              |              |              |
|-------------------------|---------------------|--------------|--------------|--------------|---------------|--------------|--------------|--------------|--------------|
| <b>T25_C6_TSIII</b>     |                     |              |              |              |               |              |              |              |              |
| <b>cis-T25_C7_TSIII</b> | -2948.557198        | -2947.384511 | 0.844919     | -2947.624966 | -2947.639202  | 0.223754     | 0.204047     | -2947.848720 | -2947.843249 |
| <b>cis-T25_T-Pd-SM</b>  | -2247.101672        | -2246.909495 | 0.679596     | -2246.356342 | -2246.365684  | 0.172455     | 0.160422     | -2246.528797 | -2246.526107 |
|                         |                     |              |              |              |               |              |              |              |              |
| <b>E-benchmark</b>      | E_SPC(B3LYP-D3(BJ)) | E_SPC(MN15)  | E_SPC(M06)   | E_SPC(M06L)  | E_SPC(B3PW91) | E_SPC(BP86)  | E_SPC(gas)   | E_SPC(HFIPb) | E_SPC(HFIPc) |
| <b>ACOH</b>             | -229.182745         | -228.920184  | -229.041917  | -229.139536  | -229.083773   | -229.176288  | -228.909268  | -228.917867  | -228.892032  |
| <b>Ac-Gly-OH</b>        | -437.279601         | -436.771130  | -437.001079  | -437.195861  | -437.086169   | -437.263260  | -436.759502  | -436.777895  | -436.739858  |
| <b>CH2CHCO2Et</b>       | -345.923710         | -345.494018  | -345.671938  | -345.848419  | -345.764494   | -345.897877  | -345.493163  | -345.500836  | -345.478507  |
| <b>Cat_3Pd</b>          | -1755.437937        | -1753.001534 | -1754.470788 | -1755.302221 | -1754.874584  | -1755.578662 | -1753.667988 | -1753.696910 | -1753.611324 |
| <b>T12_C5_IN2</b>       | -3234.802777        | -3230.720392 | -3232.658741 | -3234.246091 | -3233.414399  | -3234.684598 | -3231.207633 | -3231.287050 | -3231.206599 |
| <b>T12_C5_IN4</b>       | -3372.670141        | -3368.410072 | -3370.420432 | -3372.091850 | -3371.208887  | -3372.523144 | -3368.909641 | -3368.980024 | -3368.898205 |
| <b>T12_C6_IN2</b>       | -3234.803095        | -3230.723972 | -3232.661272 | -3234.249728 | -3233.427752  | -3234.697369 | -3231.209676 | -3231.284759 | -3231.199788 |
| <b>T12_C6_IN4</b>       | -3372.673793        | -3368.412630 | -3370.424589 | -3372.093654 | -3371.221113  | -3372.534852 | -3368.912056 | -3368.982698 | -3368.895130 |
| <b>T12_C7_IN2</b>       | -3234.809106        | -3230.727323 | -3232.665960 | -3234.255108 | -3233.427004  | -3234.696531 | -3231.217898 | -3231.290936 | -3231.211082 |
| <b>T12_C7_IN4</b>       | -3372.675896        | -3368.413057 | -3370.425883 | -3372.096128 | -3371.223017  | -3372.537113 | -3368.914309 | -3368.983624 | -3368.895958 |
| <b>T12_C5_TSI</b>       | -3234.782714        | -3230.696814 | -3232.637132 | -3234.229589 | -3233.391992  | -3234.666747 | -3231.188364 | -3231.267136 | -3231.188513 |
| <b>T12_C6_TSI</b>       | -3234.777378        | -3230.691557 | -3232.632454 | -3234.225732 | -3233.398499  | -3234.672714 | -3231.180987 | -3231.258928 | -3231.172993 |
| <b>T12_C7_TSI</b>       | -3234.777440        | -3230.691661 | -3232.632015 | -3234.227585 | -3233.392149  | -3234.667079 | -3231.184850 | -3231.257813 | -3231.176033 |
| <b>T12_C5_TSII</b>      | -3372.629017        | -3368.369966 | -3370.380693 | -3372.048117 | -3371.161877  | -3372.480444 | -3368.868908 | -3368.940954 | -3368.863986 |
| <b>T12_C6_TSII</b>      | -3372.626440        | -3368.366498 | -3370.380993 | -3372.045946 | -3371.178179  | -3372.496059 | -3368.862359 | -3368.935773 | -3368.849758 |
| <b>T12_C7_TSII</b>      | -3372.631401        | -3368.366990 | -3370.383461 | -3372.050229 | -3371.170932  | -3372.489186 | -3368.865149 | -3368.941363 | -3368.857576 |
| <b>T12_C5_TSIII</b>     | -3372.630444        | -3368.368220 | -3370.382904 | -3372.048825 | -3371.186155  | -3372.503046 | -3368.865109 | -3368.937516 | -3368.846493 |
| <b>T12_C6_TSIII</b>     | -3372.639503        | -3368.380731 | -3370.392943 | -3372.059204 | -3371.199827  | -3372.515753 | -3368.875309 | -3368.947773 | -3368.857809 |
| <b>T12_C7_TSIII</b>     | -3372.649268        | -3368.390646 | -3370.401789 | -3372.071133 | -3371.185160  | -3372.500890 | -3368.890271 | -3368.960855 | -3368.882494 |
| <b>T12_T-Pd-SM</b>      | -2670.759637        | -2667.475803 | -2668.935743 | -2670.261454 | -2669.561384  | -2670.600365 | -2667.732398 | -2667.789499 | -2667.735635 |
| <b>cis-T25_C5_IN2</b>   | -2812.893155        | -2809.053598 | -2810.809556 | -2812.380488 | -2811.656010  | -2812.761362 |              |              |              |
| <b>cis-T25_C5_IN4</b>   | -2950.777010        | -2946.758047 | -2948.586329 | -2950.240502 | -2949.457287  | -2950.606135 |              |              |              |
| <b>cis-T25_C6_IN2</b>   | -2812.897977        | -2809.059310 | -2810.815833 | -2812.385327 | -2811.664334  | -2812.768887 |              |              |              |

|                 |              |              |              |              |              |              |  |  |  |
|-----------------|--------------|--------------|--------------|--------------|--------------|--------------|--|--|--|
| cis-T25_C6_IN4  | -2950.779286 | -2946.759243 | -2948.590359 | -2950.241314 | -2949.471013 | -2950.618570 |  |  |  |
| cis-T25_C7_IN2  | -2812.918751 | -2809.080923 | -2810.834165 | -2812.406380 | -2811.670070 | -2812.774643 |  |  |  |
| cis-T25_C7_IN4  | -2950.786502 | -2946.766731 | -2948.596220 | -2950.248174 | -2949.468469 | -2950.616996 |  |  |  |
| cis-T25_C5_TSI  | -2812.881695 | -2809.038302 | -2810.797044 | -2812.370583 | -2811.642576 | -2812.751161 |  |  |  |
| cis-T25_C6_TSI  | -2812.881202 | -2809.037819 | -2810.797012 | -2812.370056 | -2811.646149 | -2812.754491 |  |  |  |
| cis-T25_C7_TSI  | -2812.886283 | -2809.042033 | -2810.799882 | -2812.375514 | -2811.641297 | -2812.750858 |  |  |  |
| cis-T25_C5_TSH  | -2950.719765 | -2946.701017 | -2948.530959 | -2950.180911 | -2949.408391 | -2950.561638 |  |  |  |
| cis-T25_C6_TSH  | -2950.722152 | -2946.703608 | -2948.535046 | -2950.183047 | -2949.417362 | -2950.569859 |  |  |  |
| cis-T25_C7_TSH  | -2950.727821 | -2946.707911 | -2948.540373 | -2950.189793 | -2949.411194 | -2950.564188 |  |  |  |
| cis-T25_C5_TSHH | -2950.728506 | -2946.712137 | -2948.540992 | -2950.192423 | -2949.422502 | -2950.573923 |  |  |  |
| cis-T25_C6_TSHH | -2950.733776 | -2946.717102 | -2948.547835 | -2950.196805 | -2949.429575 | -2950.581128 |  |  |  |
| cis-T25_C7_TSHH | -2950.748524 | -2946.733405 | -2948.558933 | -2950.210098 | -2949.425629 | -2950.577100 |  |  |  |
| cis-T25_T-Pd-SM | -2248.867740 | -2245.826795 | -2247.103498 | -2248.410952 | -2247.805083 | -2248.678768 |  |  |  |

E\_SPC= Single-point solvation energies; E= Electronic energies; ZPE = zero-point vibrational energy; H\_SPC = enthalpy; qh-H\_SPC = enthalpy with Head-Gordon correction; G(T)\_SPC = Gibbs free energy; qh-G(T)\_SPC = Gibbs free energy with Head-Gordon correction.

### 3.3 Cartesian Coordinates

15

Ac-Gly-OH Eopt -436.622905  
C 1.809571 -0.166589 -0.000046  
O 2.068841 -1.360408 -0.001458  
N 0.529409 0.284634 0.002086  
H 0.295977 1.267606 0.002247  
C 2.878966 0.901976 -0.000453  
H 2.483162 1.921609 -0.000051  
H 3.513039 0.764760 0.880047  
H 3.512027 0.764993 -0.881708  
C -0.568134 -0.635187 0.001805  
H -0.543908 -1.296657 0.877958  
H -0.541832 -1.298089 -0.873175  
C -1.856869 0.140576 -0.000139  
O -1.934879 1.347416 -0.000998  
O -2.921449 -0.670284 -0.000677  
H -3.705643 -0.095098 -0.001855

8

AcOH Eopt -228.832855  
C -0.092793 0.123421 0.000227  
O -0.649099 1.194199 -0.000191  
O -0.768308 -1.044866 0.000032  
H -1.710144 -0.803630 -0.000147  
C 1.390352 -0.103272 0.000020  
H 1.906028 0.856453 -0.000253  
H 1.678884 -0.684373 -0.881207  
H 1.679136 -0.684009 0.881401

15

CH2CHCO2Et Eopt -345.396184  
C 1.722369 -0.758071 -0.000018  
C 2.981062 -0.323371 0.000068  
H 3.823610 -1.007935 0.000119  
H 3.187443 0.743544 0.000083  
C 0.599786 0.207252 -0.000100  
O 0.707339 1.413637 0.000011  
O -0.579524 -0.436638 -0.000054  
C -1.736282 0.408315 0.000002  
C -2.951658 -0.486925 0.000047  
H -3.862500 0.120235 0.000090  
H -2.964002 -1.127262 0.887275  
H -2.964076 -1.127248 -0.887191  
H -1.700870 1.056585 0.881985  
H -1.700944 1.056599 -0.881972  
H 1.467163 -1.813713 -0.000037

45

Cat\_3Pd Eopt -1749.766534  
Pd 0.357288 -1.770269 -0.011970  
C 2.470503 -0.738794 -1.839022  
O 2.003770 -1.719408 -1.199180  
O 2.223016 0.485137 -1.652572  
C -0.469900 2.515387 1.871819

O -1.487007 2.187002 1.202631  
O 0.719454 2.131896 1.695556  
C -0.711615 3.472774 3.008619  
H 0.228876 3.767970 3.474281  
H -1.238975 4.353175 2.630633  
H -1.361849 2.991495 3.745443  
C 3.462122 -1.063410 -2.924704  
H 3.162684 -1.974484 -3.446346  
H 3.554658 -0.227458 -3.619343  
H 4.437638 -1.242193 -2.459196  
Pd -1.719191 0.578569 -0.012948  
C -0.555461 2.513133 -1.850563  
O 0.509023 2.604386 -1.180445  
O -1.500850 1.694971 -1.679063  
C 2.395963 -0.886089 1.869224  
O 1.463373 -1.714913 1.674704  
O 2.621144 0.175778 1.228742  
C 3.370270 -1.223312 2.966662  
H 3.715531 -0.311801 3.457806  
H 2.912783 -1.905644 3.684598  
H 4.236899 -1.721088 2.517633  
C -0.704910 3.493117 -2.983945  
H 0.064735 3.285863 -3.733861  
H -1.694963 3.418219 -3.434167  
H -0.534029 4.506134 -2.609321  
Pd 1.352671 1.202838 0.020428  
C -1.977403 -1.660442 1.830482  
O -1.176285 -2.377405 1.171159  
O -2.233652 -0.437567 1.653391  
C -2.707641 -2.350436 2.952115  
H -1.978394 -2.707276 3.685491  
H -3.418948 -1.673900 3.426299  
H -3.228951 -3.226062 2.554632  
C -1.870622 -1.732878 -1.884465  
O -0.687689 -2.133733 -1.698663  
O -2.489843 -0.849084 -1.233401  
C -2.640472 -2.413456 -2.985093  
H -3.238662 -3.217063 -2.541423  
H -3.319282 -1.705667 -3.464144  
H -1.955726 -2.852607 -3.712133

93

T12\_C5\_IN2 Eopt -3228.077183  
Pd -3.132071 -0.278943 0.173662  
C -5.789269 0.098114 -0.701706  
C -5.152721 -2.156209 -0.453719  
C -7.059098 -0.271744 -1.124860  
C -6.396972 -2.591729 -0.885612  
H -7.769731 0.508154 -1.375720  
H -6.578347 -3.658390 -0.961401  
N -4.913716 -0.847027 -0.372284



|    |           |           |           |
|----|-----------|-----------|-----------|
| H  | -8.341024 | -1.947426 | -1.546267 |
| C  | -7.356815 | -1.631775 | -1.212369 |
| N  | -2.922230 | -2.324198 | 0.354292  |
| N  | -3.963527 | 1.571388  | -0.236868 |
| C  | -3.979942 | -3.042673 | -0.116633 |
| C  | -5.280366 | 1.507432  | -0.559776 |
| O  | -4.049086 | -4.254142 | -0.280362 |
| O  | -6.058450 | 2.446204  | -0.733466 |
| C  | -1.680700 | -2.939992 | 0.554384  |
| C  | -1.063886 | -3.700289 | -0.445154 |
| C  | -0.969870 | -2.669298 | 1.728372  |
| C  | 0.255717  | -4.110442 | -0.294814 |
| C  | 0.352268  | -3.075387 | 1.861857  |
| C  | 0.981775  | -3.790482 | 0.847432  |
| H  | 2.021677  | -4.083887 | 0.939427  |
| C  | -0.192209 | -0.154398 | -0.236543 |
| C  | -0.857878 | 0.604185  | 1.866900  |
| C  | -0.533267 | -0.663629 | -1.509932 |
| C  | 1.177772  | 0.046361  | 0.093501  |
| C  | 0.467391  | 0.789728  | 2.281659  |
| H  | -1.687994 | 0.823893  | 2.529990  |
| C  | 0.459129  | -0.983930 | -2.401359 |
| H  | -1.581566 | -0.810632 | -1.752466 |
| C  | 2.193718  | -0.178457 | -0.886220 |
| C  | 1.477996  | 0.511711  | 1.392847  |
| H  | 0.669872  | 1.135859  | 3.288589  |
| C  | 1.814909  | -0.730370 | -2.095249 |
| H  | 0.199004  | -1.409882 | -3.366068 |
| H  | 2.521900  | 0.640532  | 1.667580  |
| H  | 2.566167  | -0.937955 | -2.854132 |
| N  | -1.176409 | 0.152541  | 0.664935  |
| Pd | 3.897122  | 0.903508  | -0.716640 |
| C  | 6.568938  | 1.645554  | -0.051013 |
| O  | 7.615976  | 2.230206  | 0.150407  |
| O  | 5.500996  | 2.152383  | -0.584489 |
| N  | 5.193903  | -0.443110 | 0.064320  |
| C  | 5.009141  | -1.697036 | 0.304157  |
| C  | 6.050747  | -2.591904 | 0.893387  |
| H  | 5.638620  | -3.590715 | 1.037823  |
| H  | 6.397793  | -2.197025 | 1.853569  |
| H  | 6.921344  | -2.651408 | 0.231546  |
| O  | 3.873075  | -2.305346 | 0.042961  |
| C  | 6.487336  | 0.166819  | 0.363585  |
| H  | 6.697936  | 0.115253  | 1.439112  |
| H  | 7.296041  | -0.363960 | -0.152741 |
| H  | -1.456761 | -2.106508 | 2.516338  |
| H  | -1.612868 | -3.940344 | -1.347915 |
| C  | 0.958691  | -4.801763 | -1.424954 |
| C  | 1.141223  | -2.748078 | 3.093363  |
| F  | 1.828214  | -5.722629 | -0.983210 |
| F  | 1.669982  | -3.922596 | -2.163049 |
| F  | 0.104455  | -5.409159 | -2.258493 |
| F  | 1.479739  | -3.850008 | 3.778679  |

|            |           |              |           |
|------------|-----------|--------------|-----------|
| F          | 2.296734  | -2.123131    | 2.780700  |
| F          | 0.471008  | -1.942579    | 3.933260  |
| C          | -1.339930 | 4.315140     | 0.258196  |
| C          | -1.971061 | 5.079036     | 1.253519  |
| C          | -0.004253 | 4.631137     | -0.071341 |
| C          | -1.289901 | 6.136084     | 1.863578  |
| C          | 0.016137  | 6.449669     | 1.521144  |
| C          | 0.662461  | 5.683665     | 0.559353  |
| H          | -1.801958 | 6.711422     | 2.631673  |
| H          | 0.533679  | 7.272045     | 2.005996  |
| H          | 1.690434  | 5.902628     | 0.281698  |
| C          | 0.783471  | 3.837100     | -1.042815 |
| C          | 1.886365  | 3.103678     | -0.612660 |
| C          | 0.538678  | 3.793152     | -2.417370 |
| N          | 2.630467  | 2.380509     | -1.457242 |
| H          | 2.161555  | 3.071741     | 0.435848  |
| N          | 1.308611  | 3.118789     | -3.271581 |
| H          | -0.298961 | 4.339649     | -2.846241 |
| C          | 2.316793  | 2.433834     | -2.758600 |
| H          | 2.941261  | 1.857337     | -3.432525 |
| C          | -2.034606 | 3.136118     | -0.398916 |
| H          | -1.455459 | 2.233176     | -0.188835 |
| H          | -2.014945 | 3.241417     | -1.490630 |
| C          | -3.485819 | 2.917998     | 0.038993  |
| H          | -4.124488 | 3.597714     | -0.539858 |
| C          | -3.693187 | 3.282191     | 1.505306  |
| H          | -4.733175 | 3.074279     | 1.775908  |
| H          | -3.050576 | 2.659402     | 2.143037  |
| C          | -3.369904 | 4.752067     | 1.707364  |
| H          | -4.093994 | 5.355267     | 1.139942  |
| H          | -3.487967 | 5.041030     | 2.758267  |
| H          | 3.235178  | -1.645583    | -0.338622 |
| 101        |           |              |           |
| T12_C5_IN3 | Eopt      | -3365.707167 |           |
| Pd         | -3.505096 | 0.047797     | 0.223706  |
| C          | -6.070063 | 0.841021     | -0.643439 |
| C          | -5.771490 | -1.491010    | -0.476001 |
| C          | -7.376545 | 0.675857     | -1.084177 |
| C          | -7.061787 | -1.723845    | -0.929094 |
| H          | -7.963228 | 1.559260     | -1.311344 |
| H          | -7.395645 | -2.748839    | -1.048942 |
| N          | -5.346767 | -0.233881    | -0.343190 |
| H          | -8.885264 | -0.778538    | -1.571015 |
| C          | -7.868632 | -0.622326    | -1.221859 |
| N          | -3.597539 | -2.008366    | 0.334696  |
| N          | -4.045003 | 2.008531     | -0.140709 |
| C          | -4.736605 | -2.549609    | -0.178676 |
| C          | -5.355694 | 2.154472     | -0.460295 |
| O          | -4.967761 | -3.729803    | -0.407627 |
| O          | -5.982465 | 3.204461     | -0.607287 |
| C          | -2.441826 | -2.785059    | 0.487256  |
| C          | -1.865331 | -3.459590    | -0.593990 |
| C          | -1.747185 | -2.738092    | 1.699743  |

|   |           |           |           |            |           |              |           |
|---|-----------|-----------|-----------|------------|-----------|--------------|-----------|
| C | -0.591218 | -4.003981 | -0.478886 | C          | -3.494227 | 3.595994     | 1.647795  |
| C | -0.475853 | -3.289409 | 1.805136  | H          | -4.550746 | 3.539749     | 1.928388  |
| C | 0.116629  | -3.919454 | 0.715037  | H          | -2.947095 | 2.859630     | 2.253270  |
| H | 1.122054  | -4.319427 | 0.788597  | C          | -2.947710 | 4.991350     | 1.891815  |
| C | -0.601938 | -0.240045 | -0.243012 | H          | -3.579579 | 5.717482     | 1.359228  |
| C | -1.095175 | 0.436155  | 1.935407  | H          | -3.005018 | 5.257199     | 2.953934  |
| C | -1.042898 | -0.552076 | -1.547221 | Pd         | 3.581944  | 0.062857     | -0.796588 |
| C | 0.786039  | -0.314854 | 0.071075  | C          | 3.585642  | -2.088104    | -0.140536 |
| C | 0.248951  | 0.355703  | 2.326067  | C          | 4.846439  | -1.526140    | -0.070541 |
| H | -1.865863 | 0.735489  | 2.638257  | H          | 2.981479  | -2.169347    | 0.758253  |
| C | -0.135629 | -0.960166 | -2.493978 | H          | 3.296683  | -2.705835    | -0.983489 |
| H | -2.101766 | -0.477413 | -1.775694 | H          | 5.581524  | -1.676601    | -0.855698 |
| C | 1.707308  | -0.628673 | -0.962980 | C          | 5.328494  | -0.957947    | 1.220662  |
| C | 1.188081  | -0.019069 | 1.394778  | O          | 4.606858  | -0.674671    | 2.156436  |
| H | 0.522465  | 0.573231  | 3.351979  | O          | 6.647006  | -0.804614    | 1.207643  |
| C | 1.244876  | -0.998021 | -2.204704 | C          | 7.206176  | -0.129181    | 2.343799  |
| H | -0.479659 | -1.229517 | -3.488207 | C          | 8.658438  | 0.137700     | 2.034426  |
| H | 2.240183  | -0.102898 | 1.664551  | H          | 7.078461  | -0.762495    | 3.228063  |
| H | 1.946454  | -1.253616 | -2.995189 | H          | 6.642075  | 0.793984     | 2.506074  |
| N | -1.504454 | 0.149873  | 0.710926  | H          | 8.749720  | 0.770413     | 1.146260  |
| H | -2.197866 | -2.222755 | 2.540405  | H          | 9.130656  | 0.652609     | 2.877155  |
| H | -2.394676 | -3.497813 | -1.538713 | H          | 9.199457  | -0.796116    | 1.853445  |
| C | 0.053316  | -4.658813 | -1.664222 | C          | 5.840314  | 1.213187     | -1.928818 |
| C | 0.294391  | -3.205736 | 3.088117  | O          | 5.275808  | 0.744298     | -2.922429 |
| F | -0.129173 | -5.986676 | -1.670882 | O          | 5.388882  | 1.123706     | -0.720059 |
| F | 1.386915  | -4.450255 | -1.674634 | C          | 7.161057  | 1.946669     | -2.040134 |
| F | -0.431232 | -4.184952 | -2.822957 | H          | 7.453308  | 2.049917     | -3.086302 |
| F | 0.363495  | -4.391307 | 3.710354  | H          | 7.084613  | 2.933380     | -1.572837 |
| F | 1.567498  | -2.812733 | 2.867994  | H          | 7.931718  | 1.389341     | -1.496494 |
| F | -0.246544 | -2.331438 | 3.951597  | 101        |           |              |           |
| C | -1.022869 | 4.294126  | 0.400170  | T12_C5_IN4 | Eopt      | -3365.751311 |           |
| C | -1.521998 | 5.119120  | 1.421882  | Pd         | -3.339938 | -0.087847    | 0.159607  |
| C | 0.339705  | 4.417034  | 0.055727  | C          | -6.079768 | 0.395344     | -0.377055 |
| C | -0.685935 | 6.050963  | 2.042684  | C          | -5.512930 | -1.877076    | -0.171141 |
| C | 0.646938  | 6.178263  | 1.684624  | C          | -7.408447 | 0.077374     | -0.624115 |
| C | 1.160382  | 5.347666  | 0.696675  | C          | -6.820638 | -2.263391    | -0.425501 |
| H | -1.098088 | 6.676694  | 2.831275  | H          | -8.109501 | 0.886583     | -0.797146 |
| H | 1.286083  | 6.904593  | 2.177959  | H          | -7.053084 | -3.322566    | -0.448611 |
| H | 2.205996  | 5.418186  | 0.408022  | N          | -5.204969 | -0.580275    | -0.150036 |
| C | 1.002329  | 3.545949  | -0.946250 | H          | -8.806385 | -1.544276    | -0.840583 |
| C | 1.924391  | 2.586273  | -0.537387 | C          | -7.774214 | -1.268208    | -0.645092 |
| C | 0.837659  | 3.657184  | -2.329089 | N          | -3.215931 | -2.137382    | 0.365032  |
| N | 2.598066  | 1.834094  | -1.413138 | N          | -4.156402 | 1.791711     | -0.165907 |
| H | 2.109574  | 2.403584  | 0.515829  | C          | -4.356127 | -2.813179    | 0.057279  |
| N | 1.545794  | 2.946826  | -3.207504 | C          | -5.498951 | 1.779493     | -0.347208 |
| H | 0.121732  | 4.365886  | -2.741921 | O          | -4.507410 | -4.025077    | -0.031594 |
| C | 2.406789  | 2.066081  | -2.719321 | O          | -6.242176 | 2.752121     | -0.491106 |
| H | 3.020086  | 1.485258  | -3.400850 | C          | -2.024215 | -2.857993    | 0.530860  |
| C | -1.892834 | 3.249869  | -0.274346 | C          | -1.463774 | -3.581866    | -0.526159 |
| H | -1.462585 | 2.264577  | -0.077382 | C          | -1.324979 | -2.769165    | 1.735591  |
| H | -1.852443 | 3.368486  | -1.364552 | C          | -0.210412 | -4.164677    | -0.387074 |
| C | -3.359351 | 3.253569  | 0.167739  | C          | -0.070203 | -3.355786    | 1.864112  |
| H | -3.885068 | 4.043812  | -0.383900 | C          | 0.499303  | -4.054473    | 0.805143  |

|   |           |           |           |            |           |              |           |
|---|-----------|-----------|-----------|------------|-----------|--------------|-----------|
| H | 1.492301  | -4.481739 | 0.896297  | C          | 2.079789  | 1.632404     | -2.585733 |
| C | -0.454237 | -0.358650 | -0.500800 | H          | 2.662172  | 0.871873     | -3.090147 |
| C | -0.816864 | 0.453873  | 1.652801  | C          | 4.111918  | -0.616678    | -1.191334 |
| C | -0.946118 | -0.565181 | -1.807736 | Pd         | 3.796173  | 1.044414     | -0.061763 |
| C | 0.886000  | -0.714859 | -0.176454 | H          | 4.068569  | -0.305013    | -2.240578 |
| C | 0.511980  | 0.208726  | 2.023868  | C          | 5.509797  | -1.023290    | -0.848810 |
| H | -1.526522 | 0.879431  | 2.355978  | H          | 3.261100  | -2.054195    | 0.158989  |
| C | -0.141940 | -1.163131 | -2.745223 | O          | 5.812737  | -2.002028    | -0.203243 |
| H | -1.961055 | -0.254480 | -2.038576 | O          | 6.407400  | -0.145596    | -1.333334 |
| C | 1.698412  | -1.350902 | -1.161609 | C          | 7.758762  | -0.367703    | -0.918377 |
| C | 1.347518  | -0.414981 | 1.127140  | C          | 8.580860  | 0.793524     | -1.423120 |
| H | 0.844525  | 0.457457  | 3.024726  | H          | 8.105547  | -1.324688    | -1.323708 |
| C | 1.164284  | -1.571988 | -2.413003 | H          | 7.779061  | -0.443424    | 0.173433  |
| H | -0.515956 | -1.332780 | -3.750086 | H          | 9.627782  | 0.669215     | -1.127584 |
| H | 2.351220  | -0.692343 | 1.428561  | H          | 8.536296  | 0.859768     | -2.514793 |
| N | -1.291319 | 0.161908  | 0.452317  | H          | 8.212267  | 1.735941     | -1.005641 |
| H | -1.999876 | -3.647859 | -1.465277 | O          | 3.915374  | 2.446668     | 1.690247  |
| H | -1.763077 | -2.214419 | 2.557697  | C          | 4.726504  | 1.615429     | 2.184013  |
| C | 0.699943  | -3.241908 | 3.145420  | O          | 5.009803  | 0.541297     | 1.546845  |
| C | 0.396421  | -4.919848 | -1.532437 | C          | 5.397461  | 1.866497     | 3.500265  |
| F | 1.988643  | -2.920105 | 2.911954  | H          | 6.406974  | 2.250875     | 3.316197  |
| F | 0.196198  | -2.297635 | 3.958388  | H          | 4.840052  | 2.607597     | 4.076026  |
| F | 0.708711  | -4.393920 | 3.830203  | H          | 5.494182  | 0.933035     | 4.060032  |
| F | -0.100074 | -4.521079 | -2.715500 | C          | 3.122147  | -1.732412    | -0.877650 |
| F | 0.177214  | -6.238785 | -1.435204 | H          | 3.372696  | -2.612551    | -1.484872 |
| F | 1.731875  | -4.749114 | -1.581924 | H          | 1.769778  | -2.075432    | -3.162077 |
| C | -3.593763 | 3.130331  | -0.110175 | I01        |           |              |           |
| C | -2.127924 | 3.146332  | -0.514353 | T12_C5_IN5 | Eopt      | -3365.715238 |           |
| H | -4.161555 | 3.744221  | -0.823964 | Pd         | -3.242948 | 0.180405     | -0.455846 |
| C | -3.778221 | 3.778385  | 1.258871  | C          | -5.677284 | 1.208063     | -1.460056 |
| C | -1.404309 | 4.430620  | -0.179755 | C          | -5.591137 | -1.140447    | -1.325723 |
| H | -1.614211 | 2.321024  | -0.013251 | C          | -6.957139 | 1.163987     | -1.996950 |
| H | -2.053845 | 2.924702  | -1.586004 | C          | -6.868661 | -1.253490    | -1.853730 |
| H | -4.823549 | 3.679791  | 1.564674  | H          | -7.453893 | 2.099843     | -2.228489 |
| H | -3.155129 | 3.258752  | 2.001266  | H          | -7.294823 | -2.243203    | -1.977317 |
| C | -3.388214 | 5.245627  | 1.165555  | N          | -5.060035 | 0.070171     | -1.154632 |
| C | -1.997598 | 5.426445  | 0.610728  | H          | -8.549508 | -0.144908    | -2.613758 |
| C | -0.069428 | 4.606216  | -0.592322 | C          | -7.548534 | -0.083307    | -2.196571 |
| H | -4.113476 | 5.762603  | 0.520013  | N          | -3.472141 | -1.862598    | -0.536672 |
| H | -3.452072 | 5.732022  | 2.146190  | N          | -3.672988 | 2.199890     | -0.611334 |
| C | -1.276922 | 6.582854  | 0.922094  | C          | -4.719173 | -2.286552    | -0.881958 |
| C | 0.638869  | 5.761124  | -0.258596 | C          | -4.919418 | 2.452108     | -1.086751 |
| C | 0.656194  | 3.536115  | -1.314233 | O          | -5.149030 | -3.432484    | -0.872270 |
| C | 0.027609  | 6.762836  | 0.486274  | O          | -5.477993 | 3.545055     | -1.185820 |
| H | -1.753106 | 7.345941  | 1.533911  | C          | -2.566580 | -2.776236    | 0.020046  |
| H | 1.669253  | 5.868904  | -0.587404 | C          | -1.341545 | -3.015593    | -0.611876 |
| C | 1.699262  | 2.862311  | -0.689669 | C          | -2.824883 | -3.388339    | 1.248439  |
| C | 0.398877  | 3.150396  | -2.632991 | C          | -0.387048 | -3.821101    | -0.003594 |
| H | 0.574696  | 7.665464  | 0.741875  | C          | -1.863522 | -4.198780    | 1.844523  |
| N | 2.405107  | 1.906913  | -1.317419 | C          | -0.636179 | -4.415965    | 1.230839  |
| H | 1.988505  | 3.081476  | 0.335489  | H          | 0.111552  | -5.043969    | 1.703026  |
| N | 1.105493  | 2.216279  | -3.266319 | C          | -0.282485 | 0.022167     | -0.763015 |
| H | -0.394466 | 3.630170  | -3.203012 | C          | -0.998752 | -0.263261    | 1.435224  |

|   |           |           |           |            |           |              |           |
|---|-----------|-----------|-----------|------------|-----------|--------------|-----------|
| C | -0.581605 | 0.412952  | -2.087971 | Pd         | 4.356092  | 0.589215     | 0.001711  |
| C | 1.030505  | -0.404182 | -0.422647 | H          | 4.427318  | 0.251324     | -2.634681 |
| C | 0.285145  | -0.634175 | 1.858626  | C          | 5.789374  | -1.245066    | -1.939956 |
| H | -1.830104 | -0.228580 | 2.131856  | H          | 5.176309  | -0.537746    | 0.607619  |
| C | 0.389808  | 0.329881  | -3.053181 | O          | 6.681887  | -0.944372    | -2.699803 |
| H | -1.581755 | 0.771668  | -2.313478 | O          | 5.816748  | -2.312622    | -1.132055 |
| C | 2.024713  | -0.482609 | -1.447978 | C          | 7.029665  | -3.076586    | -1.157334 |
| C | 1.295914  | -0.710453 | 0.931419  | C          | 6.874153  | -4.193889    | -0.154955 |
| H | 0.458852  | -0.864124 | 2.903439  | H          | 7.865967  | -2.413895    | -0.911813 |
| C | 1.682217  | -0.133166 | -2.737441 | H          | 7.190456  | -3.450482    | -2.173710 |
| H | 0.163257  | 0.620580  | -4.074349 | H          | 7.779313  | -4.809205    | -0.138543 |
| H | 2.298595  | -0.987577 | 1.237733  | H          | 6.710948  | -3.792951    | 0.850248  |
| N | -1.272459 | 0.059127  | 0.181843  | H          | 6.025581  | -4.834767    | -0.413827 |
| H | -1.147066 | -2.556548 | -1.574730 | O          | 5.651760  | 2.053867     | 1.174160  |
| H | -3.780409 | -3.220578 | 1.733818  | C          | 4.854364  | 1.981226     | 2.142670  |
| C | -2.124257 | -4.759915 | 3.211484  | O          | 3.829020  | 1.226715     | 2.097958  |
| C | 0.941195  | -4.069911 | -0.652171 | C          | 5.074855  | 2.819375     | 3.374982  |
| F | -1.386899 | -5.853126 | 3.454687  | H          | 6.034314  | 3.336046     | 3.328867  |
| F | -1.818974 | -3.858539 | 4.165852  | H          | 4.266961  | 3.554884     | 3.458048  |
| F | -3.412302 | -5.085951 | 3.380692  | H          | 5.029453  | 2.186406     | 4.265798  |
| F | 1.072053  | -3.430016 | -1.822095 | C          | 3.393542  | -0.919229    | -1.115444 |
| F | 1.152240  | -5.373945 | -0.874747 | H          | 3.484426  | -1.853564    | -0.566575 |
| F | 1.953862  | -3.651817 | 0.144264  | H          | 2.420522  | -0.223313    | -3.528101 |
| C | -3.054450 | 3.345685  | 0.038271  | 93         |           |              |           |
| C | -1.534507 | 3.317281  | -0.033286 | T12_C5_TSI | Eopt      | -3228.061730 |           |
| H | -3.414525 | 4.241805  | -0.484009 | Pd         | -3.108336 | -0.316628    | 0.096181  |
| C | -3.514255 | 3.453551  | 1.490096  | C          | -5.796942 | -0.070812    | -0.745904 |
| C | -0.855109 | 4.315113  | 0.880218  | C          | -5.011962 | -2.286602    | -0.616140 |
| H | -1.189032 | 2.317305  | 0.248079  | C          | -7.043414 | -0.501674    | -1.179655 |
| H | -1.214567 | 3.459084  | -1.072626 | C          | -6.228887 | -2.780965    | -1.061984 |
| H | -4.606442 | 3.391389  | 1.526390  | H          | -7.805874 | 0.241937     | -1.384426 |
| H | -3.111694 | 2.604620  | 2.061861  | H          | -6.340476 | -3.852741    | -1.185713 |
| C | -3.039946 | 4.770281  | 2.081499  | N          | -4.855550 | -0.970273    | -0.472856 |
| C | -1.558398 | 4.979002  | 1.897689  | H          | -8.216752 | -2.234625    | -1.679612 |
| C | 0.532258  | 4.528522  | 0.775992  | C          | -7.252327 | -1.871951    | -1.335936 |
| H | -3.584102 | 5.592990  | 1.594574  | N          | -2.782846 | -2.349837    | 0.197889  |
| H | -3.286941 | 4.831492  | 3.148151  | N          | -4.070570 | 1.486420     | -0.211762 |
| C | -0.879210 | 5.838827  | 2.764878  | C          | -3.790017 | -3.113653    | -0.306506 |
| C | 1.194761  | 5.382245  | 1.659817  | C          | -5.381421 | 1.359209     | -0.534928 |
| C | 1.364192  | 3.842729  | -0.240977 | O          | -3.786306 | -4.321284    | -0.506579 |
| C | 0.487340  | 6.047216  | 2.653928  | O          | -6.214402 | 2.256766     | -0.663767 |
| H | -1.442334 | 6.342626  | 3.547494  | C          | -1.523605 | -2.918177    | 0.436520  |
| H | 2.267149  | 5.526501  | 1.555156  | C          | -0.778657 | -3.495170    | -0.595588 |
| C | 2.251521  | 2.834707  | 0.127463  | C          | -0.934849 | -2.776047    | 1.695215  |
| C | 1.392128  | 4.205566  | -1.588947 | C          | 0.551294  | -3.842718    | -0.388013 |
| H | 1.001475  | 6.714329  | 3.339648  | C          | 0.394733  | -3.131922    | 1.893524  |
| N | 3.095584  | 2.279699  | -0.750964 | C          | 1.156680  | -3.651253    | 0.850453  |
| H | 2.309743  | 2.459176  | 1.146440  | H          | 2.212964  | -3.857117    | 0.985755  |
| N | 2.237269  | 3.667305  | -2.468310 | C          | -0.146749 | -0.150912    | -0.236202 |
| H | 0.721310  | 4.976081  | -1.965771 | C          | -0.861858 | 0.489976     | 1.881603  |
| C | 3.060310  | 2.738738  | -2.004019 | C          | -0.445761 | -0.441238    | -1.587968 |
| H | 3.774375  | 2.313043  | -2.702686 | C          | 1.203909  | -0.196095    | 0.198590  |
| C | 4.529310  | -0.465666 | -1.824630 | C          | 0.450993  | 0.500051     | 2.379158  |

|    |           |           |           |
|----|-----------|-----------|-----------|
| H  | -1.702206 | 0.735024  | 2.522725  |
| C  | 0.551614  | -0.833485 | -2.450511 |
| H  | -1.479954 | -0.370407 | -1.914832 |
| C  | 2.243129  | -0.556396 | -0.713567 |
| C  | 1.478915  | 0.134171  | 1.544081  |
| H  | 0.623462  | 0.751823  | 3.419143  |
| C  | 1.886052  | -0.915134 | -2.005717 |
| H  | 0.305205  | -1.085437 | -3.477484 |
| H  | 2.504672  | 0.079693  | 1.896613  |
| H  | 2.656632  | -1.249284 | -2.695708 |
| N  | -1.157125 | 0.165023  | 0.633647  |
| Pd | 3.821932  | 0.921444  | -0.701461 |
| H  | 3.222186  | -1.229924 | -0.178241 |
| C  | 6.379033  | 2.046163  | -0.291758 |
| O  | 7.314591  | 2.814783  | -0.228265 |
| O  | 5.177987  | 2.388488  | -0.690958 |
| N  | 5.321232  | -0.157207 | 0.027817  |
| C  | 5.197127  | -1.395730 | 0.452006  |
| C  | 6.385165  | -2.115729 | 1.033482  |
| H  | 6.103118  | -3.143562 | 1.260991  |
| H  | 6.721816  | -1.621338 | 1.951481  |
| H  | 7.225827  | -2.111379 | 0.332043  |
| O  | 4.096392  | -2.030146 | 0.399005  |
| C  | 6.568920  | 0.577250  | 0.100995  |
| H  | 6.993694  | 0.560487  | 1.112528  |
| H  | 7.324860  | 0.153735  | -0.574345 |
| H  | -1.519383 | -2.347178 | 2.501585  |
| H  | -1.231549 | -3.615753 | -1.572623 |
| C  | 1.355092  | -4.411158 | -1.520901 |
| C  | 1.036149  | -2.959583 | 3.237937  |
| F  | 1.353789  | -5.752100 | -1.513088 |
| F  | 2.637377  | -4.016640 | -1.464400 |
| F  | 0.871244  | -4.023569 | -2.716521 |
| F  | 1.193457  | -4.131186 | 3.870534  |
| F  | 2.259767  | -2.407825 | 3.132842  |
| F  | 0.311267  | -2.165722 | 4.047699  |
| C  | -1.515386 | 4.247300  | 0.347918  |
| C  | -2.137092 | 4.976720  | 1.372702  |
| C  | -0.176824 | 4.551747  | 0.028025  |
| C  | -1.440592 | 6.002901  | 2.017183  |
| C  | -0.131402 | 6.312288  | 1.679364  |
| C  | 0.506727  | 5.571894  | 0.691317  |
| H  | -1.940781 | 6.556344  | 2.808823  |
| H  | 0.396880  | 7.110911  | 2.191590  |
| H  | 1.538372  | 5.784494  | 0.422611  |
| C  | 0.578619  | 3.751473  | -0.962170 |
| C  | 1.647847  | 2.961378  | -0.551137 |
| C  | 0.318639  | 3.735912  | -2.335107 |
| N  | 2.355404  | 2.224294  | -1.414319 |
| H  | 1.933548  | 2.903184  | 0.494061  |
| N  | 1.037255  | 3.025500  | -3.203526 |
| H  | -0.490360 | 4.334384  | -2.749322 |
| C  | 2.023381  | 2.295106  | -2.708729 |

|             |           |              |           |
|-------------|-----------|--------------|-----------|
| H           | 2.617024  | 1.701659     | -3.395841 |
| C           | -2.218584 | 3.108027     | -0.359061 |
| H           | -1.629982 | 2.196828     | -0.217480 |
| H           | -2.228839 | 3.278600     | -1.442680 |
| C           | -3.652708 | 2.842247     | 0.098904  |
| H           | -4.326018 | 3.512129     | -0.451526 |
| C           | -3.843981 | 3.161808     | 1.577778  |
| H           | -4.877013 | 2.931706     | 1.857072  |
| H           | -3.183571 | 2.529490     | 2.187886  |
| C           | -3.534055 | 4.630648     | 1.818431  |
| H           | -4.263821 | 5.242328     | 1.267564  |
| H           | -3.653598 | 4.890324     | 2.876691  |
| 101         |           |              |           |
| T12_C5_TSII | Eopt      | -3365.708411 |           |
| Pd          | -3.373211 | 0.147722     | 0.260982  |
| C           | -6.035019 | 0.892016     | -0.331122 |
| C           | -5.679766 | -1.431106    | -0.184457 |
| C           | -7.377157 | 0.701974     | -0.632328 |
| C           | -7.005951 | -1.689371    | -0.498369 |
| H           | -7.999223 | 1.574750     | -0.798203 |
| H           | -7.332273 | -2.721231    | -0.570462 |
| N           | -5.262376 | -0.166964    | -0.106169 |
| H           | -8.903003 | -0.780612    | -0.953233 |
| C           | -7.858355 | -0.604682    | -0.713286 |
| N           | -3.434691 | -1.907406    | 0.422771  |
| N           | -3.996239 | 2.096126     | -0.032123 |
| C           | -4.612784 | -2.472540    | 0.041098  |
| C           | -5.333314 | 2.218514     | -0.222086 |
| O           | -4.858025 | -3.662243    | -0.113576 |
| O           | -5.990088 | 3.256699     | -0.309364 |
| C           | -2.290857 | -2.698400    | 0.579503  |
| C           | -1.797939 | -3.490597    | -0.461845 |
| C           | -1.537732 | -2.577743    | 1.751105  |
| C           | -0.549143 | -4.091026    | -0.350477 |
| C           | -0.294120 | -3.188134    | 1.854874  |
| C           | 0.213024  | -3.946933    | 0.804087  |
| H           | 1.194607  | -4.402730    | 0.877402  |
| C           | -0.493819 | -0.264131    | -0.394531 |
| C           | -0.827737 | 0.650309     | 1.722777  |
| C           | -1.018158 | -0.642178    | -1.651107 |
| C           | 0.893972  | -0.438753    | -0.124877 |
| C           | 0.527469  | 0.522931     | 2.052453  |
| H           | -1.538425 | 1.064405     | 2.430062  |
| C           | -0.200861 | -1.231044    | -2.585119 |
| H           | -2.074496 | -0.481381    | -1.845285 |
| C           | 1.732913  | -0.963620    | -1.152271 |
| C           | 1.389022  | -0.029060    | 1.134425  |
| H           | 0.873885  | 0.839365     | 3.029317  |
| C           | 1.173583  | -1.411689    | -2.330985 |
| H           | -0.613163 | -1.551437    | -3.537095 |
| H           | 2.440378  | -0.168125    | 1.377264  |
| H           | 1.802940  | -1.855371    | -3.098157 |
| N           | -1.323891 | 0.269770     | 0.556308  |

|    |           |           |           |              |           |              |           |
|----|-----------|-----------|-----------|--------------|-----------|--------------|-----------|
| H  | -1.924211 | -1.969809 | 2.561322  | H            | 8.595147  | 0.672379     | 2.867278  |
| H  | -2.373687 | -3.584946 | -1.374695 | H            | 8.802246  | -0.737733    | 1.808801  |
| C  | 0.001686  | -4.882535 | -1.498571 | C            | 5.444811  | 1.866684     | -0.517795 |
| C  | 0.535004  | -3.037943 | 3.095379  | O            | 4.653561  | 1.974854     | 0.429190  |
| F  | -0.262074 | -6.191056 | -1.388864 | O            | 5.311819  | 1.041700     | -1.498780 |
| F  | 1.345239  | -4.762857 | -1.577598 | C            | 6.671580  | 2.750948     | -0.613846 |
| F  | -0.499526 | -4.472506 | -2.675300 | H            | 6.852510  | 3.255157     | 0.337372  |
| F  | 0.567595  | -4.170795 | 3.812953  | H            | 7.545196  | 2.163074     | -0.908340 |
| F  | 1.811645  | -2.734705 | 2.790967  | H            | 6.511445  | 3.505811     | -1.391838 |
| F  | 0.073331  | -2.067385 | 3.899946  | 101          |           |              |           |
| C  | -0.891436 | 4.284761  | 0.179373  | T12_C5_TSIII | Eopt      | -3365.695581 |           |
| C  | -1.237125 | 5.118332  | 1.254650  | Pd           | 3.168586  | -0.525648    | -0.664651 |
| C  | 0.448978  | 4.289424  | -0.263884 | C            | 5.067167  | -2.038342    | -2.104266 |
| C  | -0.273684 | 5.946191  | 1.836937  | C            | 5.330516  | 0.296197     | -2.290346 |
| C  | 1.038023  | 5.954632  | 1.387288  | C            | 6.135224  | -2.260617    | -2.963183 |
| C  | 1.399650  | 5.112626  | 0.343768  | C            | 6.408897  | 0.141462     | -3.148947 |
| H  | -0.565965 | 6.581521  | 2.670092  | H            | 6.419844  | -3.283739    | -3.183185 |
| H  | 1.778713  | 6.596652  | 1.854704  | H            | 6.908892  | 1.028563     | -3.522464 |
| H  | 2.427014  | 5.086687  | -0.010304 | N            | 4.718589  | -0.787613    | -1.813021 |
| C  | 0.929559  | 3.376647  | -1.324304 | H            | 7.642797  | -1.301648    | -4.161714 |
| C  | 1.965621  | 2.483202  | -1.055253 | C            | 6.803048  | -1.154175    | -3.488759 |
| C  | 0.440995  | 3.348657  | -2.633304 | N            | 3.625279  | 1.433162     | -1.091018 |
| N  | 2.403383  | 1.619782  | -1.979820 | N            | 3.280150  | -2.585106    | -0.613149 |
| H  | 2.464589  | 2.440134  | -0.090739 | C            | 4.774688  | 1.610136     | -1.798926 |
| N  | 0.902960  | 2.518610  | -3.568668 | C            | 4.295160  | -3.095051    | -1.358476 |
| H  | -0.340589 | 4.037807  | -2.945901 | O            | 5.340982  | 2.663760     | -2.057218 |
| C  | 1.851927  | 1.673904  | -3.195470 | O            | 4.661731  | -4.267214    | -1.434129 |
| H  | 2.217526  | 0.962421  | -3.929036 | C            | 3.032231  | 2.523944     | -0.439115 |
| C  | -1.901569 | 3.343661  | -0.447609 | C            | 1.721229  | 2.893081     | -0.757933 |
| H  | -1.499989 | 2.327041  | -0.408240 | C            | 3.689104  | 3.193343     | 0.595715  |
| H  | -2.017873 | 3.564070  | -1.515053 | C            | 1.070529  | 3.877500     | -0.024531 |
| C  | -3.297143 | 3.351890  | 0.185541  | C            | 3.032078  | 4.186841     | 1.315531  |
| H  | -3.895647 | 4.129257  | -0.306401 | C            | 1.717759  | 4.530559     | 1.021208  |
| C  | -3.262699 | 3.718671  | 1.664902  | H            | 1.211563  | 5.304849     | 1.587364  |
| H  | -4.287269 | 3.712362  | 2.050601  | C            | 0.292980  | 0.129525     | -0.245603 |
| H  | -2.688968 | 2.970945  | 2.229095  | C            | 1.559836  | 0.256807     | 1.706472  |
| C  | -2.630946 | 5.091598  | 1.825211  | C            | 0.229924  | -0.195108    | -1.618055 |
| H  | -3.260699 | 5.834296  | 1.313060  | C            | -0.848128 | 0.672595     | 0.413646  |
| H  | -2.599537 | 5.390378  | 2.879319  | C            | 0.477612  | 0.775796     | 2.431461  |
| Pd | 3.566787  | -0.042543 | -1.264510 | H            | 2.526323  | 0.104937     | 2.175101  |
| C  | 3.313182  | -2.211821 | -0.522359 | C            | -0.919308 | 0.061737     | -2.323423 |
| C  | 4.602178  | -1.634621 | -0.415187 | H            | 1.104176  | -0.632495    | -2.091410 |
| H  | 2.767567  | -2.373491 | 0.403725  | C            | -2.048700 | 0.873922     | -0.336804 |
| H  | 3.115896  | -2.924019 | -1.315348 | C            | -0.717541 | 0.979577     | 1.787329  |
| H  | 5.383571  | -1.872534 | -1.132811 | H            | 0.606017  | 1.024222     | 3.478828  |
| C  | 5.030659  | -1.149449 | 0.924732  | C            | -2.057686 | 0.592098     | -1.690159 |
| O  | 4.295681  | -1.088023 | 1.891829  | H            | -0.970131 | -0.174032    | -3.381875 |
| O  | 6.311462  | -0.791795 | 0.933870  | H            | -1.550937 | 1.400404     | 2.337966  |
| C  | 6.753044  | -0.145121 | 2.140000  | N            | 1.469580  | -0.063622    | 0.428708  |
| C  | 8.217688  | 0.173645  | 1.968746  | H            | 1.219322  | 2.396126     | -1.579991 |
| H  | 6.571334  | -0.814481 | 2.986596  | H            | 4.713634  | 2.927756     | 0.833743  |
| H  | 6.143837  | 0.754134  | 2.273848  | C            | 3.726247  | 4.823168     | 2.483554  |
| H  | 8.373377  | 0.839453  | 1.114759  | C            | -0.354614 | 4.238534     | -0.323144 |

|    |           |           |           |            |           |              |           |
|----|-----------|-----------|-----------|------------|-----------|--------------|-----------|
| F  | 5.039285  | 4.972863  | 2.264167  | H          | -6.897924 | -2.340769    | -3.430137 |
| F  | 3.217330  | 6.028949  | 2.775159  | H          | -7.758199 | -0.830506    | -3.139992 |
| F  | 3.598497  | 4.064206  | 3.590479  | H          | -6.630184 | -0.937058    | -4.515119 |
| F  | -0.795970 | 3.681720  | -1.458114 | C          | -3.302496 | 1.233159     | 0.371297  |
| F  | -0.520114 | 5.564483  | -0.423456 | H          | -3.222559 | 1.727711     | 1.337769  |
| F  | -1.179958 | 3.825920  | 0.666883  | H          | -2.978342 | 0.683547     | -2.262283 |
| C  | 2.763558  | -3.478675 | 0.409243  | 93         |           |              |           |
| C  | 1.241942  | -3.429944 | 0.534293  | T12_C6_IN2 | Eopt      | -3228.078046 |           |
| H  | 3.055391  | -4.495599 | 0.118288  | Pd         | -2.538601 | 1.386261     | -0.477066 |
| C  | 3.427130  | -3.178418 | 1.750396  | N          | -3.683662 | 2.238282     | -1.801408 |
| C  | 0.703173  | -4.065182 | 1.802399  | C          | -3.402697 | 3.492055     | -2.145120 |
| H  | 0.915226  | -2.383624 | 0.507662  | C          | -4.189472 | 4.126912     | -3.097008 |
| H  | 0.797720  | -3.896322 | -0.352829 | C          | -5.257135 | 3.420395     | -3.650907 |
| H  | 4.513338  | -3.148644 | 1.614354  | C          | -5.525304 | 2.110039     | -3.250640 |
| H  | 3.112809  | -2.184864 | 2.099660  | C          | -4.695239 | 1.529814     | -2.302674 |
| C  | 3.043506  | -4.239446 | 2.765379  | C          | -4.822966 | 0.128552     | -1.763379 |
| C  | 1.550511  | -4.415415 | 2.866694  | O          | -5.759807 | -0.584747    | -2.099367 |
| C  | -0.683655 | -4.252470 | 1.970363  | N          | -3.782492 | -0.188240    | -0.941931 |
| H  | 3.499282  | -5.195768 | 2.469138  | C          | -3.702267 | -1.464721    | -0.376946 |
| H  | 3.451440  | -4.001545 | 3.755059  | C          | -4.763101 | -2.056970    | 0.314039  |
| C  | 1.013574  | -4.933556 | 4.048314  | C          | -4.584528 | -3.289405    | 0.938120  |
| C  | -1.200832 | -4.762171 | 3.163222  | C          | -3.362002 | -3.950648    | 0.893472  |
| C  | -1.670132 | -3.907222 | 0.920125  | C          | -2.313385 | -3.367941    | 0.185863  |
| C  | -0.352145 | -5.109538 | 4.206547  | C          | -2.486000 | -2.151215    | -0.456970 |
| H  | 1.691322  | -5.194733 | 4.858114  | H          | -1.676371 | -1.715027    | -1.029325 |
| H  | -2.275078 | -4.897043 | 3.259896  | C          | -0.977959 | -4.048766    | 0.155499  |
| C  | -2.561502 | -2.855004 | 1.099153  | F          | -0.354175 | -3.964123    | 1.349186  |
| C  | -1.847133 | -4.646513 | -0.253015 | F          | -1.086689 | -5.354515    | -0.126074 |
| H  | -0.755155 | -5.509478 | 5.132325  | F          | -0.156527 | -3.500047    | -0.754643 |
| N  | -3.525147 | -2.577845 | 0.210416  | H          | -3.231461 | -4.902587    | 1.396089  |
| H  | -2.498497 | -2.213289 | 1.972184  | C          | -5.748455 | -3.926650    | 1.640287  |
| N  | -2.816440 | -4.395532 | -1.131036 | F          | -6.521898 | -4.616717    | 0.788990  |
| H  | -1.190851 | -5.485994 | -0.477067 | F          | -5.345243 | -4.784463    | 2.592905  |
| C  | -3.619797 | -3.374776 | -0.863969 | F          | -6.532391 | -3.009073    | 2.229842  |
| H  | -4.424135 | -3.137640 | -1.553064 | H          | -5.719239 | -1.549692    | 0.364202  |
| C  | -4.556082 | 1.435602  | -0.275528 | H          | -6.350011 | 1.527600     | -3.646875 |
| Pd | -4.417209 | -0.633313 | 0.061132  | H          | -5.889623 | 3.895633     | -4.395136 |
| H  | -4.658628 | 1.484767  | -1.356090 | H          | -3.952547 | 5.150676     | -3.365175 |
| C  | -5.628699 | 2.039301  | 0.548966  | C          | -2.271128 | 4.120898     | -1.377146 |
| H  | -3.573711 | -0.089341 | 1.306127  | O          | -2.002077 | 5.305081     | -1.576569 |
| O  | -5.533823 | 2.291867  | 1.733668  | N          | -1.698810 | 3.271869     | -0.484398 |
| O  | -6.726356 | 2.255849  | -0.180214 | C          | -0.808769 | 3.895947     | 0.477542  |
| C  | -7.853139 | 2.775127  | 0.537310  | C          | -1.367171 | 3.822396     | 1.894364  |
| C  | -8.996187 | 2.884350  | -0.442020 | C          | -0.578797 | 4.765689     | 2.789152  |
| H  | -7.581678 | 3.745119  | 0.967281  | C          | 0.916465  | 4.630589     | 2.626363  |
| H  | -8.083134 | 2.098958  | 1.367427  | C          | 1.743359  | 5.236568     | 3.576737  |
| H  | -9.884093 | 3.278249  | 0.062850  | C          | 3.124334  | 5.183404     | 3.473083  |
| H  | -8.739828 | 3.556606  | -1.266423 | C          | 3.696096  | 4.488373     | 2.414429  |
| H  | -9.241845 | 1.903532  | -0.860586 | C          | 2.889048  | 3.858808     | 1.464474  |
| O  | -5.708894 | -1.301992 | -1.406888 | C          | 1.483688  | 3.941091     | 1.542446  |
| C  | -5.694117 | -0.758031 | -2.582138 | C          | 0.610017  | 3.329003     | 0.466680  |
| O  | -4.891283 | 0.087538  | -2.983374 | H          | 1.062003  | 3.488961     | -0.519681 |
| C  | -6.807750 | -1.252177 | -3.485642 | H          | 0.559654  | 2.242833     | 0.602637  |

|            |           |              |           |
|------------|-----------|--------------|-----------|
| C          | 3.594659  | 3.084117     | 0.416138  |
| C          | 3.536309  | 1.695260     | 0.363227  |
| N          | 4.298460  | 0.988515     | -0.481851 |
| C          | 5.132577  | 1.663965     | -1.291752 |
| N          | 5.223962  | 2.983002     | -1.345739 |
| C          | 4.465045  | 3.679565     | -0.500637 |
| H          | 4.553900  | 4.763787     | -0.543639 |
| H          | 5.786257  | 1.063309     | -1.915029 |
| Pd         | 4.381097  | -1.086174    | -0.554834 |
| C          | 2.418435  | -1.050910    | -0.138284 |
| C          | 1.890098  | -1.337056    | 1.106974  |
| C          | 0.591104  | -0.906200    | 1.483927  |
| C          | 0.026523  | -1.172235    | 2.749984  |
| C          | -1.215985 | -0.675858    | 3.060103  |
| C          | -1.893644 | 0.101151     | 2.106993  |
| N          | -1.393826 | 0.362392     | 0.910472  |
| C          | -0.176795 | -0.147199    | 0.559558  |
| C          | 0.328530  | 0.074799     | -0.741770 |
| C          | 1.575887  | -0.383354    | -1.077101 |
| H          | 1.952796  | -0.187742    | -2.077643 |
| H          | -0.281292 | 0.633464     | -1.447842 |
| H          | -2.872821 | 0.517819     | 2.319261  |
| H          | -1.683785 | -0.867463    | 4.019269  |
| H          | 0.583563  | -1.772844    | 3.463872  |
| H          | 2.479880  | -1.874937    | 1.847142  |
| N          | 4.767886  | -3.083207    | -0.672659 |
| C          | 3.952842  | -4.079089    | -0.736698 |
| O          | 2.646193  | -3.928700    | -0.693960 |
| H          | 2.431429  | -2.972477    | -0.580539 |
| C          | 4.378622  | -5.506254    | -0.872670 |
| H          | 4.832237  | -5.675077    | -1.855635 |
| H          | 5.126460  | -5.763723    | -0.116957 |
| H          | 3.509669  | -6.156315    | -0.767354 |
| C          | 6.206849  | -3.331894    | -0.747445 |
| H          | 6.444574  | -4.072645    | -1.517548 |
| H          | 6.568134  | -3.727033    | 0.211416  |
| C          | 7.022986  | -2.067356    | -1.055443 |
| O          | 8.206005  | -2.197744    | -1.302597 |
| O          | 6.371272  | -0.946705    | -1.002971 |
| H          | 2.888981  | 1.131849     | 1.025733  |
| H          | 4.776754  | 4.408218     | 2.329696  |
| H          | 3.753508  | 5.666336     | 4.214939  |
| H          | 1.282445  | 5.765839     | 4.408118  |
| H          | -0.841489 | 4.614282     | 3.843790  |
| H          | -0.863449 | 5.801018     | 2.552234  |
| H          | -2.427740 | 4.096191     | 1.888984  |
| H          | -1.295542 | 2.791256     | 2.265737  |
| H          | -0.746723 | 4.955155     | 0.195919  |
| 101        |           |              |           |
| T12_C6_IN3 | Eopt      | -3365.716204 |           |
| Pd         | -3.264870 | -0.240348    | -0.239109 |
| C          | -5.370390 | 0.708583     | -1.866506 |
| C          | -4.727361 | -1.515662    | -2.298329 |

|    |           |           |           |
|----|-----------|-----------|-----------|
| C  | -6.347683 | 0.652307  | -2.851162 |
| C  | -5.675849 | -1.632356 | -3.303770 |
| H  | -6.949959 | 1.535596  | -3.033607 |
| H  | -5.740486 | -2.564968 | -3.853726 |
| N  | -4.626176 | -0.367786 | -1.627556 |
| H  | -7.251516 | -0.602781 | -4.346905 |
| C  | -6.497520 | -0.534966 | -3.568023 |
| N  | -2.992952 | -2.195662 | -0.822470 |
| N  | -3.975050 | 1.695439  | -0.205033 |
| C  | -3.717984 | -2.568013 | -1.914724 |
| C  | -5.021103 | 1.917107  | -1.038751 |
| O  | -3.620310 | -3.604014 | -2.559336 |
| O  | -5.659531 | 2.957701  | -1.196087 |
| C  | -1.884459 | -2.949392 | -0.424112 |
| C  | -1.749975 | -3.299663 | 0.924214  |
| C  | -0.843334 | -3.250912 | -1.305447 |
| C  | -0.582855 | -3.892169 | 1.383913  |
| C  | 0.321528  | -3.848532 | -0.833413 |
| C  | 0.464287  | -4.173656 | 0.509029  |
| H  | 1.369873  | -4.647601 | 0.868107  |
| C  | -0.461898 | -0.165305 | 0.798640  |
| C  | -2.056597 | -0.413376 | 2.473699  |
| C  | -0.142022 | -0.051781 | -0.573082 |
| C  | 0.589609  | -0.173992 | 1.757442  |
| C  | -1.073003 | -0.498625 | 3.470854  |
| H  | -3.110550 | -0.486156 | 2.721502  |
| C  | 1.162218  | 0.120002  | -0.960311 |
| H  | -0.947410 | -0.085619 | -1.302240 |
| C  | 1.920677  | 0.061668  | 1.324686  |
| C  | 0.246896  | -0.365034 | 3.112915  |
| H  | -1.371263 | -0.658189 | 4.500852  |
| C  | 2.207241  | 0.250256  | -0.007892 |
| H  | 1.389778  | 0.218540  | -2.019015 |
| H  | 1.035967  | -0.404014 | 3.859140  |
| N  | -1.767556 | -0.245627 | 1.193298  |
| H  | 2.696062  | 0.137505  | 2.085089  |
| Pd | 3.866417  | 1.134091  | -0.656193 |
| H  | -2.566090 | -3.084266 | 1.603793  |
| H  | -0.942845 | -2.995600 | -2.354708 |
| C  | 1.464256  | -4.039900 | -1.785090 |
| C  | -0.408111 | -4.223778 | 2.834488  |
| F  | 1.061314  | -4.541096 | -2.958342 |
| F  | 2.067366  | -2.860866 | -2.056331 |
| F  | 2.408628  | -4.857466 | -1.292843 |
| F  | 0.624875  | -3.535577 | 3.374154  |
| F  | -0.129920 | -5.522249 | 3.020217  |
| F  | -1.493570 | -3.928590 | 3.563376  |
| C  | -3.540314 | 2.830670  | 0.585858  |
| C  | -2.049364 | 3.103900  | 0.381688  |
| H  | -4.105802 | 3.698149  | 0.222030  |
| C  | -3.864869 | 2.672310  | 2.065717  |
| C  | -1.433848 | 4.042943  | 1.397009  |
| H  | -1.506162 | 2.151795  | 0.415403  |



|            |           |              |           |    |           |           |           |
|------------|-----------|--------------|-----------|----|-----------|-----------|-----------|
| H          | -1.904221 | 3.481560     | -0.637077 | H  | -6.294851 | -2.887751 | -3.134935 |
| H          | -4.921538 | 2.407613     | 2.179849  | N  | -4.855403 | -0.366396 | -1.524552 |
| H          | -3.268044 | 1.857591     | 2.493947  | H  | -7.646653 | -0.945729 | -4.019782 |
| C          | -3.552982 | 3.973829     | 2.787885  | C  | -6.844813 | -0.779362 | -3.306214 |
| C          | -2.136814 | 4.435003     | 2.547080  | N  | -3.353763 | -2.121726 | -0.379266 |
| C          | -0.103983 | 4.485544     | 1.240516  | N  | -3.934990 | 1.887319  | -0.651963 |
| H          | -4.249938 | 4.750725     | 2.440214  | C  | -4.181396 | -2.659616 | -1.315606 |
| H          | -3.723058 | 3.872823     | 3.866466  | C  | -5.024917 | 2.017012  | -1.447345 |
| C          | -1.518018 | 5.255459     | 3.494334  | O  | -4.237532 | -3.825503 | -1.685018 |
| C          | 0.498647  | 5.295713     | 2.203867  | O  | -5.612951 | 3.051223  | -1.763555 |
| C          | 0.720772  | 4.072254     | 0.080660  | C  | -2.335095 | -2.900388 | 0.185217  |
| C          | -0.211148 | 5.690036     | 3.331768  | C  | -2.253684 | -3.016832 | 1.574277  |
| H          | -2.079390 | 5.547300     | 4.379291  | C  | -1.312110 | -3.439914 | -0.600597 |
| H          | 1.524786  | 5.622751     | 2.056738  | C  | -1.143494 | -3.608812 | 2.165900  |
| C          | 1.798327  | 3.210954     | 0.245462  | C  | -0.203696 | -4.024274 | 0.000498  |
| C          | 0.508130  | 4.514756     | -1.229084 | C  | -0.105415 | -4.108381 | 1.386078  |
| H          | 0.256453  | 6.324314     | 4.079125  | H  | 0.779364  | -4.530638 | 1.849923  |
| N          | 2.564292  | 2.828475     | -0.784686 | C  | -0.519141 | -0.296571 | 0.471867  |
| H          | 2.030617  | 2.787996     | 1.217003  | C  | -1.886315 | 0.133546  | 2.302760  |
| N          | 1.282079  | 4.162485     | -2.252584 | C  | -0.345236 | -0.370142 | -0.927197 |
| H          | -0.316469 | 5.190079     | -1.452187 | C  | 0.575272  | -0.615252 | 1.325038  |
| C          | 2.283641  | 3.329444     | -1.997256 | C  | -0.842196 | -0.116733 | 3.207717  |
| H          | 2.930172  | 3.004075     | -2.809816 | H  | -2.878244 | 0.393379  | 2.656872  |
| C          | 4.761977  | -0.739898    | -1.320317 | C  | 0.855548  | -0.780279 | -1.445151 |
| C          | 5.280337  | -0.415625    | -0.080935 | H  | -1.182473 | -0.116094 | -1.571680 |
| H          | 3.994296  | -1.502634    | -1.408043 | C  | 1.800481  | -1.027096 | 0.751054  |
| H          | 5.232940  | -0.390760    | -2.234574 | C  | 0.380210  | -0.507975 | 2.719248  |
| H          | 6.167196  | 0.206624     | 0.009917  | H  | -1.030614 | -0.037080 | 4.272038  |
| C          | 4.840214  | -1.070241    | 1.183172  | C  | 1.952914  | -1.116593 | -0.614030 |
| O          | 5.063535  | -0.603234    | 2.279645  | H  | 0.976194  | -0.849484 | -2.523267 |
| O          | 4.181115  | -2.206389    | 0.949387  | H  | 1.198124  | -0.752466 | 3.390679  |
| C          | 3.603281  | -2.888980    | 2.072806  | N  | -1.738298 | 0.046482  | 0.991093  |
| C          | 3.914336  | -4.362042    | 1.950657  | H  | 2.640343  | -1.252870 | 1.403708  |
| H          | 2.527329  | -2.699359    | 2.031276  | Pd | 4.105749  | 1.116384  | -0.161563 |
| H          | 4.003018  | -2.455860    | 2.992430  | H  | -3.052103 | -2.605734 | 2.181807  |
| H          | 3.358191  | -4.920027    | 2.711675  | H  | -1.367921 | -3.348008 | -1.678806 |
| H          | 3.630085  | -4.736367    | 0.962720  | C  | 0.916982  | -4.552243 | -0.846576 |
| H          | 4.982538  | -4.552243    | 2.092227  | C  | -1.039139 | -3.711912 | 3.657544  |
| C          | 5.555026  | 2.331603     | -2.578123 | F  | 0.967919  | -3.943529 | -2.045356 |
| O          | 4.659671  | 1.894457     | -3.317044 | F  | 2.110777  | -4.364558 | -0.254594 |
| O          | 5.571652  | 2.188253     | -1.297625 | F  | 0.796999  | -5.867379 | -1.077173 |
| C          | 6.719459  | 3.114259     | -3.147372 | F  | 0.187201  | -3.351284 | 4.087917  |
| H          | 6.579485  | 4.177452     | -2.921282 | F  | -1.245216 | -4.963824 | 4.090508  |
| H          | 7.658119  | 2.804366     | -2.680009 | F  | -1.926874 | -2.921710 | 4.285160  |
| H          | 6.770671  | 2.986332     | -4.230032 | C  | -3.443900 | 3.109938  | -0.049137 |
| 101        |           |              |           | C  | -1.924787 | 3.216939  | -0.166919 |
| T12_C6_IN4 | Eopt      | -3365.752965 |           | H  | -3.898949 | 3.940975  | -0.603345 |
| Pd         | -3.386608 | -0.062812    | -0.278040 | C  | -3.891731 | 3.238705  | 1.402458  |
| C          | -5.511608 | 0.696976     | -1.981862 | C  | -1.295867 | 4.253421  | 0.738083  |
| C          | -5.100475 | -1.620205    | -1.906340 | H  | -1.483737 | 2.240384  | 0.067783  |
| C          | -6.546739 | 0.518099     | -2.889509 | H  | -1.666659 | 3.408335  | -1.215446 |
| C          | -6.112750 | -1.865136    | -2.822601 | H  | -4.975750 | 3.094326  | 1.458223  |
| H          | -7.079714 | 1.392973     | -3.245577 | H  | -3.420116 | 2.451562  | 2.005106  |

|            |           |              |           |
|------------|-----------|--------------|-----------|
| C          | -3.501197 | 4.606997     | 1.935883  |
| C          | -2.032003 | 4.889843     | 1.750030  |
| C          | 0.077099  | 4.545047     | 0.625752  |
| H          | -4.086928 | 5.374657     | 1.408821  |
| H          | -3.759422 | 4.702442     | 2.997273  |
| C          | -1.398361 | 5.792306     | 2.608402  |
| C          | 0.694558  | 5.440819     | 1.500706  |
| C          | 0.942084  | 3.904339     | -0.393301 |
| C          | -0.045295 | 6.073053     | 2.492453  |
| H          | -1.986379 | 6.272961     | 3.387248  |
| H          | 1.756705  | 5.644296     | 1.391777  |
| C          | 1.924209  | 2.995717     | -0.018183 |
| C          | 0.913712  | 4.223655     | -1.754770 |
| H          | 0.434026  | 6.772141     | 3.171337  |
| N          | 2.788251  | 2.483599     | -0.906547 |
| H          | 2.039136  | 2.673487     | 1.012860  |
| N          | 1.785181  | 3.735656     | -2.636158 |
| H          | 0.172589  | 4.922500     | -2.138878 |
| C          | 2.698818  | 2.890877     | -2.181165 |
| H          | 3.440560  | 2.496517     | -2.871363 |
| C          | 3.285064  | -1.399682    | -1.249451 |
| C          | 3.812832  | -0.075739    | -1.782559 |
| H          | 3.985761  | -1.829052    | -0.528251 |
| H          | 3.164724  | -2.128109    | -2.064917 |
| H          | 3.073429  | 0.404115     | -2.428352 |
| C          | 5.122504  | -0.037994    | -2.480130 |
| O          | 5.438627  | 0.829088     | -3.275586 |
| O          | 5.935912  | -1.034908    | -2.109439 |
| C          | 7.269830  | -0.975925    | -2.623996 |
| C          | 8.053557  | -2.079653    | -1.956029 |
| H          | 7.686213  | 0.013568     | -2.408874 |
| H          | 7.237753  | -1.089994    | -3.713092 |
| H          | 9.089557  | -2.073132    | -2.310180 |
| H          | 8.053694  | -1.943291    | -0.870216 |
| H          | 7.617819  | -3.058316    | -2.180176 |
| C          | 5.383593  | 0.699951     | 1.942135  |
| O          | 5.355796  | -0.116955    | 0.955938  |
| O          | 4.726178  | 1.774439     | 1.889553  |
| C          | 6.232756  | 0.365421     | 3.132122  |
| H          | 6.251242  | -0.714515    | 3.296627  |
| H          | 7.259874  | 0.693879     | 2.937120  |
| H          | 5.866593  | 0.886693     | 4.018782  |
| 101        |           |              |           |
| T12_C6_IN5 | Eopt      | -3365.720662 |           |
| Pd         | 3.412383  | 0.070958     | 0.466414  |
| C          | 5.238866  | 0.814008     | 2.489492  |
| C          | 4.856414  | -1.504910    | 2.319579  |
| C          | 6.130426  | 0.623881     | 3.536461  |
| C          | 5.726248  | -1.760586    | 3.369446  |
| H          | 6.597255  | 1.494818     | 3.983504  |
| H          | 5.868735  | -2.787223    | 3.689081  |
| N          | 4.661111  | -0.245374    | 1.927978  |
| H          | 7.062534  | -0.854141    | 4.791950  |

|    |           |           |           |
|----|-----------|-----------|-----------|
| C  | 6.372661  | -0.679411 | 3.971379  |
| N  | 3.371492  | -1.986699 | 0.531401  |
| N  | 3.876088  | 2.013463  | 0.950874  |
| C  | 4.042632  | -2.537722 | 1.578976  |
| C  | 4.806315  | 2.143300  | 1.927379  |
| O  | 4.042679  | -3.708346 | 1.936172  |
| O  | 5.281327  | 3.180001  | 2.389646  |
| C  | 2.451238  | -2.749074 | -0.199991 |
| C  | 2.605157  | -2.862573 | -1.583936 |
| C  | 1.297407  | -3.264868 | 0.396458  |
| C  | 1.597898  | -3.424436 | -2.359163 |
| C  | 0.292121  | -3.819252 | -0.388319 |
| C  | 0.428558  | -3.897107 | -1.770359 |
| H  | -0.374615 | -4.295627 | -2.380435 |
| C  | 0.742447  | -0.102994 | -0.886898 |
| C  | 2.499688  | 0.325256  | -2.344970 |
| C  | 0.252995  | -0.225229 | 0.433247  |
| C  | -0.138872 | -0.348850 | -1.976742 |
| C  | 1.685357  | 0.128902  | -3.471929 |
| H  | 3.552812  | 0.561871  | -2.455019 |
| C  | -1.045330 | -0.596628 | 0.655961  |
| H  | 0.935832  | -0.046600 | 1.259729  |
| C  | -1.470533 | -0.731138 | -1.710778 |
| C  | 0.371017  | -0.220188 | -3.287742 |
| H  | 2.115824  | 0.223547  | -4.462054 |
| C  | -1.939380 | -0.855292 | -0.417420 |
| H  | -1.390720 | -0.718185 | 1.676615  |
| H  | -0.280347 | -0.416134 | -4.134172 |
| N  | 2.053617  | 0.213975  | -1.103922 |
| H  | -2.140514 | -0.915522 | -2.546824 |
| Pd | -4.467527 | 0.572078  | -0.056871 |
| H  | 3.505513  | -2.471480 | -2.044300 |
| H  | 1.170237  | -3.174610 | 1.469148  |
| C  | -0.968694 | -4.316902 | 0.257171  |
| C  | 1.745810  | -3.524027 | -3.847538 |
| F  | -2.028665 | -4.169157 | -0.556908 |
| F  | -0.892633 | -5.616095 | 0.575002  |
| F  | -1.242581 | -3.647966 | 1.392784  |
| F  | 0.625781  | -3.113435 | -4.477295 |
| F  | 1.971293  | -4.783310 | -4.246376 |
| F  | 2.758329  | -2.770822 | -4.309479 |
| C  | 3.333981  | 3.238371  | 0.398059  |
| C  | 1.806077  | 3.215067  | 0.479665  |
| H  | 3.709503  | 4.059000  | 1.022471  |
| C  | 3.812334  | 3.502930  | -1.023426 |
| C  | 1.083392  | 4.166102  | -0.447352 |
| H  | 1.463425  | 2.198768  | 0.254341  |
| H  | 1.524559  | 3.388905  | 1.523548  |
| H  | 4.907122  | 3.480203  | -1.046278 |
| H  | 3.447112  | 2.715479  | -1.694199 |
| C  | 3.285723  | 4.853692  | -1.485039 |
| C  | 1.782020  | 4.927409  | -1.396287 |
| C  | -0.325355 | 4.232522  | -0.433314 |

|            |           |              |           |    |           |           |           |
|------------|-----------|--------------|-----------|----|-----------|-----------|-----------|
| H          | 3.730039  | 5.642846     | -0.860377 | C  | -4.433454 | -1.057945 | -2.102229 |
| H          | 3.600243  | 5.065068     | -2.513724 | C  | -3.350003 | 3.543085  | -1.572244 |
| C          | 1.079177  | 5.741696     | -2.288457 | O  | -5.074407 | -2.032203 | -2.471496 |
| C          | -1.007963 | 5.041847     | -1.344334 | O  | -3.483683 | 4.755902  | -1.727854 |
| C          | -1.143911 | 3.428373     | 0.501248  | C  | -3.052726 | -2.164088 | -0.473370 |
| C          | -0.306339 | 5.805964     | -2.268553 | C  | -3.841500 | -2.623071 | 0.582836  |
| H          | 1.638331  | 6.324007     | -3.017552 | C  | -1.805756 | -2.757259 | -0.695849 |
| H          | -2.094315 | 5.073827     | -1.315285 | C  | -3.370807 | -3.629678 | 1.421678  |
| C          | -2.118274 | 2.555425     | 0.021385  | C  | -1.347061 | -3.762134 | 0.145787  |
| C          | -1.068151 | 3.526877     | 1.894672  | C  | -2.122213 | -4.203150 | 1.215527  |
| H          | -0.839259 | 6.438291     | -2.972533 | H  | -1.754466 | -4.975555 | 1.882505  |
| N          | -2.907929 | 1.858282     | 0.844394  | C  | -0.143329 | -0.212285 | 0.333912  |
| H          | -2.288063 | 2.415294     | -1.042155 | C  | -1.859577 | -0.241340 | 1.900799  |
| N          | -1.854152 | 2.838107     | 2.720769  | C  | 0.314075  | 0.120852  | -0.963105 |
| H          | -0.360675 | 4.209403     | 2.361302  | C  | 0.696195  | -0.959449 | 1.208145  |
| C          | -2.743690 | 2.033160     | 2.156571  | C  | -1.101264 | -0.998920 | 2.808813  |
| H          | -3.405960 | 1.472288     | 2.810739  | H  | -2.879707 | 0.043321  | 2.137087  |
| C          | -3.345519 | -1.216489    | -0.194817 | C  | 1.551715  | -0.298316 | -1.378326 |
| C          | -4.008669 | -1.166180    | 1.050075  | H  | -0.348599 | 0.683233  | -1.616038 |
| H          | -5.572760 | -0.229242    | -0.729668 | C  | 1.981467  | -1.337393 | 0.755618  |
| H          | -3.802885 | -1.841108    | -0.959289 | C  | 0.178037  | -1.353780 | 2.462146  |
| H          | -3.496058 | -0.858122    | 1.957822  | H  | -1.554141 | -1.314195 | 3.741755  |
| C          | -5.211784 | -2.011253    | 1.270940  | C  | 2.429357  | -1.016249 | -0.515984 |
| O          | -5.728085 | -2.729749    | 0.445433  | H  | 1.879565  | -0.072497 | -2.389267 |
| O          | -5.650633 | -1.870139    | 2.528561  | H  | 0.793330  | -1.957333 | 3.123381  |
| C          | -6.840915 | -2.604224    | 2.846998  | N  | -1.405876 | 0.144011  | 0.718811  |
| C          | -7.201911 | -2.280225    | 4.276031  | H  | 2.606525  | -1.939951 | 1.410073  |
| H          | -6.645784 | -3.671756    | 2.700714  | H  | 3.138717  | -1.927002 | -1.008667 |
| H          | -7.629342 | -2.313324    | 2.145306  | Pd | 4.470648  | -0.229964 | -0.566894 |
| H          | -8.109216 | -2.821506    | 4.562659  | C  | 7.295955  | -0.262004 | -0.587857 |
| H          | -6.397027 | -2.571583    | 4.957987  | O  | 8.457447  | 0.080765  | -0.556225 |
| H          | -7.387006 | -1.208378    | 4.396121  | O  | 6.289577  | 0.583873  | -0.566608 |
| C          | -5.532527 | 2.785691     | -0.885363 | N  | 5.491340  | -1.917656 | -0.793843 |
| O          | -5.908667 | 2.321912     | 0.222380  | C  | 4.937482  | -3.047874 | -1.194894 |
| O          | -4.669346 | 2.181347     | -1.595998 | C  | 5.807373  | -4.256663 | -1.437588 |
| C          | -6.124539 | 4.071820     | -1.402213 | H  | 5.167114  | -5.125760 | -1.588940 |
| H          | -6.543884 | 4.660347     | -0.584330 | H  | 6.486753  | -4.436870 | -0.598793 |
| H          | -5.370649 | 4.648191     | -1.944381 | H  | 6.420462  | -4.106679 | -2.333733 |
| H          | -6.928537 | 3.830868     | -2.106483 | O  | 3.696110  | -3.163323 | -1.390961 |
| 93         |           |              |           | C  | 6.921611  | -1.744386 | -0.646310 |
| T12_C6_TSI | Eopt      | -3228.052882 |           | H  | 7.293664  | -2.212637 | 0.276273  |
| Pd         | -2.753130 | 0.851963     | -0.699864 | H  | 7.478418  | -2.188286 | -1.480151 |
| C          | -4.165697 | 2.595155     | -2.413917 | H  | -4.808694 | -2.163958 | 0.760289  |
| C          | -4.720260 | 0.316716     | -2.659060 | H  | -1.190432 | -2.398457 | -1.513256 |
| C          | -5.055519 | 2.953644     | -3.417460 | C  | 0.013588  | -4.365838 | -0.049654 |
| C          | -5.628827 | 0.610483     | -3.664993 | C  | -4.155100 | -3.982175 | 2.649032  |
| H          | -5.157973 | 4.003724     | -3.668726 | F  | 0.680629  | -3.800349 | -1.059516 |
| H          | -6.186551 | -0.202838    | -4.116648 | F  | 0.763926  | -4.216954 | 1.065574  |
| N          | -4.037715 | 1.310709     | -2.089384 | F  | -0.057972 | -5.682984 | -0.286413 |
| H          | -6.489927 | 2.199702     | -4.832745 | F  | -3.878157 | -5.215154 | 3.092934  |
| C          | -5.786230 | 1.944653     | -4.045636 | F  | -5.475804 | -3.901010 | 2.447583  |
| N          | -3.416814 | -1.022282    | -1.200661 | F  | -3.861000 | -3.127814 | 3.656480  |
| N          | -2.559749 | 2.897304     | -0.679078 | C  | -1.930708 | 3.713768  | 0.339676  |

|             |           |              |           |    |           |           |           |
|-------------|-----------|--------------|-----------|----|-----------|-----------|-----------|
| C           | -0.430730 | 3.440082     | 0.431623  | C  | -0.456200 | -0.141267 | 0.354435  |
| H           | -2.082732 | 4.761399     | 0.050984  | C  | -1.987302 | -0.127624 | 2.103279  |
| C           | -2.600551 | 3.499738     | 1.693525  | C  | -0.153814 | 0.140420  | -0.998334 |
| C           | 0.224866  | 3.944628     | 1.697386  | C  | 0.506382  | -0.807053 | 1.164829  |
| H           | -0.272996 | 2.357738     | 0.363240  | C  | -1.098741 | -0.799839 | 2.959161  |
| H           | 0.068069  | 3.863877     | -0.449118 | H  | -2.981925 | 0.148234  | 2.437935  |
| H           | -3.682264 | 3.633925     | 1.585952  | C  | 1.050744  | -0.246683 | -1.526706 |
| H           | -2.428197 | 2.466916     | 2.025066  | H  | -0.899573 | 0.652583  | -1.601376 |
| C           | -2.034839 | 4.474601     | 2.712496  | C  | 1.761633  | -1.142713 | 0.608278  |
| C           | -0.529909 | 4.419796     | 2.780941  | C  | 0.148518  | -1.132207 | 2.492563  |
| C           | 1.626810  | 3.925132     | 1.814247  | H  | -1.415776 | -1.046036 | 3.966326  |
| H           | -2.344829 | 5.494746     | 2.441880  | C  | 2.041782  | -0.857785 | -0.714542 |
| H           | -2.452785 | 4.284593     | 3.708485  | H  | 1.266853  | -0.047402 | -2.572673 |
| C           | 0.117914  | 4.860348     | 3.937942  | H  | 0.865156  | -1.654314 | 3.120415  |
| C           | 2.257030  | 4.377701     | 2.974072  | N  | -1.677933 | 0.200080  | 0.859581  |
| C           | 2.500305  | 3.445460     | 0.714117  | H  | 2.498608  | -1.667180 | 1.213317  |
| C           | 1.500864  | 4.846893     | 4.041951  | Pd | 3.984100  | -0.320881 | -1.131973 |
| H           | -0.484210 | 5.221258     | 4.769013  | H  | -5.405766 | -2.429635 | 0.715955  |
| H           | 3.341902  | 4.354827     | 3.034571  | H  | -1.723631 | -1.950289 | -1.409484 |
| C           | 2.822757  | 2.103276     | 0.543336  | C  | -0.485035 | -4.185963 | -0.491066 |
| C           | 3.131460  | 4.330183     | -0.164015 | C  | -4.782444 | -4.721775 | 1.997387  |
| H           | 1.989472  | 5.194597     | 4.947389  | F  | 0.012089  | -3.601611 | -1.596501 |
| N           | 3.719325  | 1.709123     | -0.368816 | F  | 0.381917  | -3.916516 | 0.508410  |
| H           | 2.376657  | 1.327406     | 1.157651  | F  | -0.449861 | -5.511168 | -0.681189 |
| N           | 4.015495  | 3.942968     | -1.082048 | F  | -4.452337 | -6.020142 | 2.062471  |
| H           | 2.916615  | 5.396010     | -0.110379 | F  | -6.085005 | -4.643957 | 1.693863  |
| C           | 4.295291  | 2.651072     | -1.132342 | F  | -4.638509 | -4.216464 | 3.238015  |
| H           | 5.059859  | 2.312198     | -1.822415 | C  | -1.927394 | 3.780261  | 0.631533  |
| 101         |           |              |           | C  | -0.443037 | 3.440835  | 0.516606  |
| T12_C6_TSII | Eopt      | -3365.700172 |           | H  | -2.056721 | 4.842548  | 0.387982  |
| Pd          | -3.127590 | 1.013688     | -0.376121 | C  | -2.396351 | 3.571345  | 2.067759  |
| C           | -4.602417 | 2.948957     | -1.807748 | C  | 0.397229  | 4.053378  | 1.617366  |
| C           | -5.396411 | 0.743861     | -2.043756 | H  | -0.329482 | 2.351100  | 0.537518  |
| C           | -5.596329 | 3.432321     | -2.648266 | H  | -0.070168 | 3.760805  | -0.464109 |
| C           | -6.417078 | 1.163465     | -2.884137 | H  | -3.481985 | 3.706355  | 2.121996  |
| H           | -5.636363 | 4.498460     | -2.843062 | H  | -2.176053 | 2.541378  | 2.378283  |
| H           | -7.109201 | 0.423934     | -3.272048 | C  | -1.688588 | 4.557506  | 2.981504  |
| N           | -4.544693 | 1.644444     | -1.553610 | C  | -0.193407 | 4.575928  | 2.779125  |
| H           | -7.293747 | 2.876349     | -3.847778 | C  | 1.798578  | 4.122573  | 1.490515  |
| C           | -6.505387 | 2.523026     | -3.189400 | H  | -2.082588 | 5.566258  | 2.789696  |
| N           | -4.001941 | -0.779471    | -0.873502 | H  | -1.909484 | 4.341812  | 4.034285  |
| N           | -2.751075 | 3.037694     | -0.303934 | C  | 0.606861  | 5.153665  | 3.768633  |
| C           | -5.145559 | -0.677042    | -1.605966 | C  | 2.578025  | 4.718858  | 2.483798  |
| C           | -3.591060 | 3.782808     | -1.066630 | C  | 2.529349  | 3.578742  | 0.320588  |
| O           | -5.909347 | -1.575685    | -1.934193 | C  | 1.983292  | 5.236188  | 3.628082  |
| O           | -3.631956 | 5.007955     | -1.174791 | H  | 0.128427  | 5.549131  | 4.662185  |
| C           | -3.602815 | -2.028316    | -0.381597 | H  | 3.657148  | 4.755542  | 2.360107  |
| C           | -4.407956 | -2.780473    | 0.476994  | C  | 2.694347  | 2.213554  | 0.100056  |
| C           | -2.334237 | -2.513361    | -0.713708 | C  | 3.211852  | 4.412938  | -0.568632 |
| C           | -3.932642 | -3.974743    | 1.011300  | H  | 2.591960  | 5.691099  | 4.404010  |
| C           | -1.866809 | -3.702044    | -0.168830 | N  | 3.489658  | 1.750546  | -0.868518 |
| C           | -2.659994 | -4.443141    | 0.703100  | H  | 2.209579  | 1.472065  | 0.728408  |
| H           | -2.302114 | -5.378256    | 1.119200  | N  | 3.995151  | 3.958532  | -1.546614 |

|              |           |              |           |    |           |           |           |
|--------------|-----------|--------------|-----------|----|-----------|-----------|-----------|
| H            | 3.123275  | 5.494066     | -0.475296 | C  | 0.329010  | -1.115578 | -2.118538 |
| C            | 4.120240  | 2.643832     | -1.643740 | C  | 2.410377  | -0.474467 | -3.144345 |
| H            | 4.802324  | 2.238023     | -2.383135 | H  | 3.602408  | 0.872025  | -1.928664 |
| C            | 3.040255  | -2.386100    | -1.599902 | C  | -1.324879 | -1.021341 | 0.147777  |
| C            | 4.455900  | -2.300546    | -1.477672 | H  | 0.138053  | 0.279585  | 1.006296  |
| H            | 2.526212  | -3.037948    | -0.902562 | C  | -0.908480 | -1.803090 | -2.104861 |
| H            | 2.600881  | -2.339471    | -2.592328 | C  | 1.231738  | -1.178578 | -3.200576 |
| H            | 5.093792  | -2.247639    | -2.356517 | H  | 3.135851  | -0.511772 | -3.949062 |
| C            | 5.057317  | -2.803924    | -0.215900 | C  | -1.735123 | -1.748016 | -1.006407 |
| O            | 4.411350  | -3.079973    | 0.777402  | H  | -1.967539 | -0.996411 | 1.030673  |
| O            | 6.381257  | -2.892823    | -0.306345 | H  | 0.990323  | -1.797376 | -4.060115 |
| C            | 7.066242  | -3.115043    | 0.936812  | N  | 1.853620  | 0.383881  | -0.979288 |
| C            | 8.544889  | -3.117174    | 0.638078  | H  | -1.201710 | -2.366200 | -2.987713 |
| H            | 6.726973  | -4.064221    | 1.363671  | Pd | -4.421758 | -0.818836 | -0.143913 |
| H            | 6.788298  | -2.303027    | 1.614392  | H  | 6.067177  | -0.959504 | 0.423304  |
| H            | 9.109322  | -3.291086    | 1.559924  | H  | 1.933565  | -2.021893 | 0.750327  |
| H            | 8.802595  | -3.903580    | -0.078455 | C  | 1.992288  | -4.180225 | -0.911907 |
| H            | 8.852503  | -2.152450    | 0.223851  | C  | 6.804106  | -2.916513 | -1.281773 |
| C            | 6.606914  | 0.298066     | -0.459256 | F  | 0.861377  | -3.892837 | -0.252469 |
| O            | 6.161350  | -0.016134    | 0.646260  | F  | 1.718968  | -4.070498 | -2.231119 |
| O            | 5.918074  | 0.300321     | -1.556578 | F  | 2.278363  | -5.471277 | -0.691201 |
| C            | 8.051471  | 0.718105     | -0.641871 | F  | 6.991247  | -4.190446 | -1.658213 |
| H            | 8.563002  | -0.006419    | -1.284510 | F  | 7.783561  | -2.592898 | -0.427330 |
| H            | 8.102349  | 1.688138     | -1.146119 | F  | 6.974868  | -2.153758 | -2.380033 |
| H            | 8.556365  | 0.773740     | 0.324119  | C  | 0.795833  | 3.812125  | -0.383027 |
| I01          |           |              |           | C  | -0.616495 | 3.298438  | -0.668133 |
| T12_C6_TSIII | Eopt      | -3365.705527 |           | H  | 0.703768  | 4.866200  | -0.087774 |
| Pd           | 2.453379  | 1.335368     | 0.760697  | C  | 1.615127  | 3.750680  | -1.665613 |
| C            | 2.547130  | 3.243569     | 2.837757  | C  | -1.247659 | 4.017102  | -1.844609 |
| C            | 3.956964  | 1.383635     | 3.156035  | H  | -0.570043 | 2.216165  | -0.857000 |
| C            | 2.933551  | 3.787175     | 4.055475  | H  | -1.235885 | 3.425991  | 0.227177  |
| C            | 4.394087  | 1.878917     | 4.375761  | H  | 2.665497  | 3.974992  | -1.448703 |
| H            | 2.504167  | 4.735701     | 4.358911  | H  | 1.573602  | 2.736261  | -2.080587 |
| H            | 5.126384  | 1.308797     | 4.937071  | C  | 1.052978  | 4.749623  | -2.664753 |
| N            | 3.066571  | 2.081492     | 2.451405  | C  | -0.452640 | 4.702662  | -2.778083 |
| H            | 4.187340  | 3.496649     | 5.779600  | C  | -2.647739 | 4.056433  | -2.006038 |
| C            | 3.866018  | 3.090811     | 4.824712  | H  | 1.342781  | 5.764569  | -2.356699 |
| N            | 3.681857  | -0.187208    | 1.398178  | H  | 1.495359  | 4.598346  | -3.657680 |
| N            | 1.453657  | 3.137516     | 0.718468  | C  | -1.055663 | 5.402776  | -3.827102 |
| C            | 4.403961  | 0.092456     | 2.519076  | C  | -3.230112 | 4.778642  | -3.049229 |
| C            | 1.617611  | 3.882899     | 1.841048  | C  | -3.570395 | 3.326293  | -1.106772 |
| O            | 5.294402  | -0.578095    | 3.025115  | C  | -2.433703 | 5.454310  | -3.965584 |
| O            | 1.144011  | 4.991877     | 2.086225  | H  | -0.420107 | 5.925100  | -4.539214 |
| C            | 3.963981  | -1.336585    | 0.651844  | H  | -4.312518 | 4.789641  | -3.147958 |
| C            | 5.240230  | -1.606048    | 0.152103  | C  | -3.637118 | 1.937623  | -1.092704 |
| C            | 2.915308  | -2.205834    | 0.329539  | C  | -4.508741 | 3.975290  | -0.299065 |
| C            | 5.444661  | -2.700591    | -0.684273 | H  | -2.886838 | 6.009277  | -4.781790 |
| C            | 3.127567  | -3.282932    | -0.518968 | N  | -4.533563 | 1.280172  | -0.346750 |
| C            | 4.394607  | -3.539523    | -1.038273 | H  | -2.968819 | 1.335026  | -1.699098 |
| H            | 4.563544  | -4.386904    | -1.693736 | N  | -5.397050 | 3.328216  | 0.454677  |
| C            | 0.688505  | -0.325565    | -0.991947 | H  | -4.535487 | 5.063070  | -0.261945 |
| C            | 2.681764  | 0.303434     | -2.008784 | C  | -5.370031 | 2.004522  | 0.410255  |
| C            | -0.157230 | -0.308957    | 0.141726  | H  | -6.050404 | 1.440132  | 1.039410  |

|            |           |              |           |    |           |           |           |
|------------|-----------|--------------|-----------|----|-----------|-----------|-----------|
| C          | -3.089724 | -2.347286    | -1.063602 | H  | -4.099715 | -3.574232 | -4.452444 |
| C          | -3.792458 | -2.807893    | 0.079914  | C  | -3.856461 | -2.341780 | -1.958097 |
| H          | -3.951462 | -1.010429    | -1.650293 | O  | -5.026022 | -2.282771 | -2.336026 |
| H          | -3.379112 | -2.808071    | -2.008359 | N  | -3.324804 | -1.853518 | -0.808186 |
| H          | -3.335024 | -2.802265    | 1.066053  | C  | -4.214836 | -1.020182 | -0.022280 |
| C          | -4.950858 | -3.705307    | -0.138288 | C  | -4.541142 | -1.554558 | 1.366591  |
| O          | -5.404312 | -4.003650    | -1.224305 | C  | -5.666970 | -0.718828 | 1.964576  |
| O          | -5.443694 | -4.129438    | 1.028512  | C  | -5.427074 | 0.769809  | 1.859573  |
| C          | -6.629592 | -4.929341    | 0.946943  | C  | -6.198770 | 1.642568  | 2.633075  |
| C          | -7.094242 | -5.183372    | 2.360241  | C  | -6.052304 | 3.018969  | 2.534931  |
| H          | -6.394772 | -5.857339    | 0.414452  | C  | -5.106995 | 3.546683  | 1.661329  |
| H          | -7.377383 | -4.389724    | 0.356769  | C  | -4.313431 | 2.692976  | 0.897060  |
| H          | -8.004273 | -5.791802    | 2.351413  | C  | -4.473046 | 1.294981  | 0.976967  |
| H          | -6.328231 | -5.714613    | 2.933332  | C  | -3.648990 | 0.389350  | 0.093429  |
| H          | -7.312976 | -4.239075    | 2.868457  | H  | -3.560229 | 0.818861  | -0.911458 |
| C          | -4.470697 | -0.824017    | 2.734425  | H  | -2.623681 | 0.316287  | 0.478695  |
| O          | -3.263996 | -1.069108    | 2.652706  | C  | -3.293707 | 3.260289  | -0.012301 |
| O          | -5.268845 | -0.630369    | 1.735322  | C  | -1.939342 | 3.010356  | 0.183235  |
| C          | -5.157584 | -0.752081    | 4.083513  | N  | -1.003591 | 3.459356  | -0.660318 |
| H          | -5.806255 | -1.627499    | 4.199779  | C  | -1.415891 | 4.206504  | -1.704569 |
| H          | -4.419377 | -0.742259    | 4.886851  | N  | -2.677534 | 4.519205  | -1.955330 |
| H          | -5.795264 | 0.134678     | 4.142976  | C  | -3.603756 | 4.045062  | -1.122630 |
| 93         |           |              |           | H  | -4.639800 | 4.290452  | -1.350640 |
| T12_C7_IN2 | Eopt      | -3228.087850 |           | H  | -0.634639 | 4.584323  | -2.356361 |
| Pd         | -1.294136 | -2.162382    | -0.620515 | Pd | 1.051033  | 3.148394  | -0.463370 |
| N          | -1.580772 | -2.921867    | -2.393681 | C  | 0.712918  | 1.741402  | 0.925080  |
| C          | -2.829066 | -2.976489    | -2.851175 | C  | 0.104713  | 0.532235  | 0.623302  |
| C          | -3.076869 | -3.544314    | -4.093238 | C  | -0.297439 | -0.364844 | 1.641337  |
| C          | -1.995909 | -4.038498    | -4.823094 | N  | -0.965030 | -1.516040 | 1.323180  |
| C          | -0.701274 | -3.959429    | -4.308957 | C  | -1.337201 | -2.346930 | 2.285927  |
| C          | -0.524453 | -3.386209    | -3.057763 | C  | -1.072776 | -2.118519 | 3.643485  |
| C          | 0.794089  | -3.226153    | -2.356691 | C  | -0.416612 | -0.965332 | 3.999719  |
| O          | 1.828377  | -3.562168    | -2.921924 | C  | -0.026655 | -0.048940 | 3.003827  |
| N          | 0.652085  | -2.717633    | -1.096901 | C  | 0.628734  | 1.170374  | 3.300792  |
| C          | 1.803561  | -2.496168    | -0.336174 | C  | 0.978894  | 2.035950  | 2.296570  |
| C          | 1.804277  | -2.829920    | 1.022784  | H  | 1.476403  | 2.969227  | 2.547154  |
| C          | 2.910653  | -2.566625    | 1.819423  | H  | 0.843143  | 1.406417  | 4.340162  |
| C          | 4.061694  | -2.003178    | 1.277808  | H  | -0.188373 | -0.749105 | 5.039662  |
| C          | 4.073408  | -1.698883    | -0.077887 | H  | -1.386241 | -2.850673 | 4.378733  |
| C          | 2.961805  | -1.926445    | -0.880967 | H  | -1.865276 | -3.239517 | 1.965646  |
| H          | 2.990452  | -1.676826    | -1.934087 | H  | -0.115586 | 0.254058  | -0.406137 |
| C          | 5.309485  | -1.138019    | -0.713904 | N  | 3.097372  | 3.161513  | -0.415332 |
| F          | 6.175456  | -0.657161    | 0.197568  | C  | 3.934167  | 2.323850  | 0.092210  |
| F          | 5.021107  | -0.129040    | -1.560517 | O  | 3.549863  | 1.200624  | 0.664287  |
| F          | 5.964712  | -2.062917    | -1.428273 | H  | 2.572812  | 1.116910  | 0.594780  |
| H          | 4.927351  | -1.803227    | 1.897933  | C  | 5.416312  | 2.511722  | 0.098243  |
| C          | 2.855327  | -2.834562    | 3.292237  | H  | 5.812519  | 2.375171  | -0.913517 |
| F          | 2.597958  | -1.704795    | 3.986403  | H  | 5.873451  | 1.764826  | 0.745697  |
| F          | 1.892459  | -3.713720    | 3.615876  | H  | 5.682338  | 3.517564  | 0.433645  |
| F          | 4.017046  | -3.313119    | 3.760072  | C  | 3.619429  | 4.358929  | -1.073837 |
| H          | 0.933093  | -3.312900    | 1.446084  | H  | 4.490059  | 4.124231  | -1.693825 |
| H          | 0.171033  | -4.324214    | -4.840168 | H  | 3.939210  | 5.091404  | -0.320417 |
| H          | -2.162018 | -4.484382    | -5.799435 | C  | 2.585388  | 5.050677  | -1.970539 |

O 2.962057 5.950887 -2.695136  
 O 1.367546 4.618841 -1.857084  
 H -1.599439 2.435190 1.034702  
 H -4.967541 4.621654 1.581911  
 H -6.666130 3.680406 3.139391  
 H -6.934518 1.225494 3.317569  
 H -5.830984 -0.985966 3.016047  
 H -6.604474 -0.958271 1.441907  
 H -4.836992 -2.607517 1.304236  
 H -3.655379 -1.493892 2.010070  
 H -5.158719 -0.969210 -0.580388  
 101  
 T12\_C7\_IN3 Eopt -3365.719186  
 Pd -1.289414 2.376020 0.518580  
 C -3.039360 3.309668 2.533235  
 C -0.757443 3.507489 3.061712  
 C -3.405000 3.879382 3.745251  
 C -1.054140 4.074013 4.292999  
 H -4.460959 3.992125 3.965201  
 H -0.235302 4.348415 4.949077  
 N -1.749611 3.155480 2.245871  
 H -2.654755 4.709454 5.583531  
 C -2.395551 4.264442 4.627254  
 N 0.607573 2.784291 1.252599  
 N -3.345434 2.226711 0.430490  
 C 0.626121 3.243057 2.538145  
 C -3.985038 2.757310 1.504436  
 O 1.602205 3.471980 3.243174  
 O -5.194676 2.783630 1.728987  
 C 1.822689 2.555415 0.603140  
 C 1.968052 2.978037 -0.722592  
 C 2.899628 1.903803 1.217695  
 C 3.143880 2.741019 -1.419128  
 C 4.080878 1.689184 0.513603  
 C 4.220477 2.110669 -0.803031  
 H 5.146980 1.951649 -1.340833  
 C -0.123083 0.426371 -1.500578  
 C -0.903331 2.432340 -2.390333  
 C 0.084549 -0.416420 -0.385643  
 C 0.284184 -0.008276 -2.796184  
 C -0.482708 2.093960 -3.683649  
 H -1.394726 3.380589 -2.196111  
 C 0.621057 -1.675312 -0.549689  
 H -0.217637 -0.049591 0.592984  
 C 0.838162 -1.304612 -2.936655  
 C 0.105899 0.868135 -3.884072  
 H -0.631405 2.797729 -4.494442  
 H 0.438476 0.563102 -4.872547  
 N -0.733048 1.641114 -1.341377  
 H 1.130147 -1.642830 -3.927907  
 H 1.154163 3.514417 -1.193149  
 H 2.813281 1.585362 2.249104  
 C 5.231341 1.027280 1.214242

C 3.242390 3.103659 -2.868878  
 F 6.114675 0.504176 0.345601  
 F 5.904932 1.891084 1.987468  
 F 4.815418 0.029392 2.014178  
 F 3.024987 2.026248 -3.656894  
 F 4.455983 3.572312 -3.190250  
 F 2.337378 4.028536 -3.227329  
 C -4.179332 1.430965 -0.451067  
 C -3.723135 -0.022240 -0.421005  
 H -5.196095 1.483112 -0.040896  
 C -4.249142 1.913397 -1.893855  
 C -4.474561 -0.909125 -1.384236  
 H -2.647765 -0.047380 -0.642104  
 H -3.825673 -0.402960 0.602097  
 H -4.462252 2.987682 -1.922353  
 H -3.286141 1.750513 -2.391829  
 C -5.339511 1.133856 -2.621146  
 C -5.240174 -0.361477 -2.422292  
 C -4.437844 -2.309207 -1.225550  
 H -6.321167 1.469876 -2.256496  
 H -5.323660 1.358032 -3.695067  
 C -5.953240 -1.215464 -3.269656  
 C -5.170978 -3.142248 -2.068038  
 C -3.602994 -2.887023 -0.149530  
 C -5.930821 -2.592184 -3.095790  
 H -6.542620 -0.782963 -4.075527  
 H -5.127296 -4.219071 -1.927814  
 C -2.218871 -2.739499 -0.166642  
 C -4.119560 -3.555724 0.959726  
 H -6.496178 -3.237779 -3.761563  
 N -1.447952 -3.163174 0.836130  
 H -1.722441 -2.263518 -1.003614  
 N -3.355088 -4.004305 1.956753  
 H -5.191591 -3.722145 1.051749  
 C -2.053746 -3.779184 1.864181  
 H -1.402770 -4.124790 2.661135  
 C 0.989340 -2.122579 -1.844781  
 H 1.384837 -3.128005 -1.969242  
 Pd 0.717807 -3.010220 0.906827  
 C 2.284081 -1.751102 1.717397  
 C 2.835737 -2.947103 1.269707  
 H 2.391614 -0.840057 1.139270  
 H 2.008174 -1.645140 2.763769  
 H 2.941283 -3.781734 1.956607  
 C 3.606869 -3.138147 0.013512  
 O 4.037593 -4.217971 -0.322795  
 O 3.773113 -2.014002 -0.694987  
 C 4.437552 -2.204728 -1.953968  
 C 4.664152 -0.850037 -2.571605  
 H 3.808252 -2.845442 -2.581749  
 H 5.374832 -2.740291 -1.778039  
 H 5.135706 -0.966231 -3.553020  
 H 3.724296 -0.306213 -2.699809

|            |           |              |           |
|------------|-----------|--------------|-----------|
| H          | 5.326388  | -0.256247    | -1.938356 |
| C          | 0.649073  | -5.607583    | 1.526798  |
| O          | 0.504535  | -5.467835    | 0.302220  |
| O          | 0.758354  | -4.598739    | 2.330357  |
| C          | 0.696269  | -6.972296    | 2.167474  |
| H          | 0.584760  | -7.752096    | 1.412762  |
| H          | 1.648776  | -7.098454    | 2.692016  |
| H          | -0.098917 | -7.060244    | 2.915065  |
| 101        |           |              |           |
| T12_C7_IN4 | Eopt      | -3365.755616 |           |
| Pd         | 3.216180  | -0.042079    | 0.478638  |
| C          | 4.893493  | 0.788297     | 2.597919  |
| C          | 4.310752  | -1.491558    | 2.651541  |
| C          | 5.659588  | 0.654186     | 3.747777  |
| C          | 5.049600  | -1.689893    | 3.808815  |
| H          | 6.161561  | 1.531983     | 4.139857  |
| H          | 5.064781  | -2.679374    | 4.252705  |
| N          | 4.268823  | -0.277578    | 2.103059  |
| H          | 6.323369  | -0.731395    | 5.254416  |
| C          | 5.734594  | -0.601339    | 4.350984  |
| N          | 2.975449  | -2.073558    | 0.773931  |
| N          | 3.817899  | 1.902644     | 0.790265  |
| C          | 3.489561  | -2.539087    | 1.946450  |
| C          | 4.641102  | 2.071829     | 1.853642  |
| O          | 3.357375  | -3.655965    | 2.431185  |
| O          | 5.143395  | 3.117446     | 2.264845  |
| C          | 2.084656  | -2.872315    | 0.048509  |
| C          | 2.293489  | -3.061052    | -1.319586 |
| C          | 0.924910  | -3.393158    | 0.634391  |
| C          | 1.333607  | -3.700010    | -2.096185 |
| C          | -0.026408 | -4.028749    | -0.151894 |
| C          | 0.161364  | -4.179753    | -1.523009 |
| H          | -0.597226 | -4.658464    | -2.133969 |
| H          | 3.202625  | -2.679164    | -1.769457 |
| H          | 0.764262  | -3.268161    | 1.698403  |
| C          | -1.320433 | -4.501332    | 0.441014  |
| C          | 1.528410  | -3.875539    | -3.571780 |
| F          | -1.367987 | -4.327792    | 1.770374  |
| F          | -2.364653 | -3.823441    | -0.082706 |
| F          | -1.542254 | -5.798688    | 0.189739  |
| F          | 0.502117  | -3.338311    | -4.265486 |
| F          | 1.583618  | -5.170039    | -3.917073 |
| F          | 2.652979  | -3.291945    | -4.014732 |
| C          | 3.387454  | 3.109835     | 0.112986  |
| C          | 1.862331  | 3.185987     | 0.121555  |
| H          | 3.785708  | 3.953050     | 0.691818  |
| C          | 3.934880  | 3.238587     | -1.302898 |
| C          | 1.260420  | 4.171795     | -0.850916 |
| H          | 1.462954  | 2.190415     | -0.112355 |
| H          | 1.537519  | 3.392045     | 1.147528  |
| H          | 5.024839  | 3.131089     | -1.283388 |
| H          | 3.530297  | 2.439981     | -1.934653 |
| C          | 3.533302  | 4.589103     | -1.879559 |

|    |           |           |           |
|----|-----------|-----------|-----------|
| C  | 2.041373  | 4.806981  | -1.827034 |
| C  | -0.129230 | 4.399672  | -0.840518 |
| H  | 4.035006  | 5.385697  | -1.310260 |
| H  | 3.880667  | 4.689098  | -2.914718 |
| C  | 1.427710  | 5.643181  | -2.763798 |
| C  | -0.725500 | 5.228283  | -1.791032 |
| C  | -0.987770 | 3.751947  | 0.176617  |
| C  | 0.056186  | 5.855348  | -2.755005 |
| H  | 2.044815  | 6.127203  | -3.517706 |
| H  | -1.800397 | 5.387335  | -1.762150 |
| C  | -1.926058 | 2.786200  | -0.163015 |
| C  | -0.934919 | 4.084031  | 1.534604  |
| H  | -0.404676 | 6.503130  | -3.494958 |
| N  | -2.705624 | 2.206788  | 0.763672  |
| H  | -2.063511 | 2.462265  | -1.190156 |
| N  | -1.699540 | 3.507627  | 2.457353  |
| H  | -0.249522 | 4.855739  | 1.881451  |
| C  | -2.551999 | 2.580779  | 2.042067  |
| H  | -3.152341 | 2.059600  | 2.780811  |
| Pd | -4.157985 | 0.934574  | 0.077249  |
| H  | -1.582720 | -0.070439 | 1.957385  |
| C  | -5.988565 | 0.944476  | -1.610571 |
| O  | -5.667615 | -0.076687 | -0.904606 |
| O  | -5.352076 | 2.024187  | -1.481756 |
| C  | -7.146407 | 0.827919  | -2.555851 |
| H  | -7.166765 | -0.165188 | -3.011252 |
| H  | -8.077780 | 0.956881  | -1.993161 |
| H  | -7.090416 | 1.603750  | -3.321687 |
| C  | 0.776931  | -0.187018 | -1.308790 |
| N  | 2.124236  | 0.054821  | -1.288716 |
| C  | 2.796805  | 0.096622  | -2.428939 |
| C  | 2.194779  | -0.075271 | -3.683754 |
| C  | 0.845582  | -0.327693 | -3.738530 |
| C  | 0.101975  | -0.403292 | -2.544326 |
| C  | -1.270190 | -0.743498 | -2.513554 |
| C  | -1.276699 | -0.623406 | -0.085835 |
| C  | 0.055575  | -0.268407 | -0.100446 |
| H  | 0.589232  | -0.087426 | 0.830564  |
| C  | -1.987826 | -0.782915 | 1.231887  |
| C  | -3.495007 | -0.650670 | 1.176801  |
| C  | -4.117521 | -0.462108 | 2.510957  |
| O  | -3.588563 | 0.078979  | 3.469116  |
| O  | -5.372704 | -0.933140 | 2.546964  |
| C  | -6.091806 | -0.689842 | 3.759644  |
| C  | -7.481528 | -1.249984 | 3.576038  |
| H  | -8.075404 | -1.083965 | 4.480735  |
| H  | -7.443782 | -2.325738 | 3.379103  |
| H  | -7.985416 | -0.764504 | 2.734595  |
| H  | -6.106092 | 0.388412  | 3.953619  |
| H  | -5.560822 | -1.164966 | 4.591385  |
| H  | -3.979049 | -1.480184 | 0.653129  |
| H  | -1.738868 | -1.778602 | 1.631979  |
| H  | -1.783052 | -0.930871 | -3.452898 |



|                              |           |           |           |
|------------------------------|-----------|-----------|-----------|
| H                            | 0.346701  | -0.501049 | -4.687557 |
| H                            | 2.805587  | -0.033154 | -4.578212 |
| H                            | 3.866378  | 0.259102  | -2.344946 |
| C                            | -1.934124 | -0.872570 | -1.320666 |
| H                            | -2.977681 | -1.168271 | -1.321071 |
| 101                          |           |           |           |
| T12_C7_IN5 Eopt -3365.721229 |           |           |           |
| Pd                           | 2.773983  | -0.923678 | 0.754134  |
| C                            | 4.054351  | -0.404672 | 3.220138  |
| C                            | 2.954592  | -2.482348 | 3.113603  |
| C                            | 4.475719  | -0.656165 | 4.518700  |
| C                            | 3.333762  | -2.790120 | 4.411991  |
| H                            | 5.063015  | 0.100743  | 5.027001  |
| H                            | 3.006300  | -3.731411 | 4.839892  |
| N                            | 3.332648  | -1.320885 | 2.579904  |
| H                            | 4.423713  | -2.083867 | 6.127888  |
| C                            | 4.110805  | -1.865143 | 5.111051  |
| N                            | 1.960281  | -2.811689 | 0.979078  |
| N                            | 3.730481  | 0.842860  | 1.216348  |
| C                            | 2.072731  | -3.329496 | 2.234813  |
| C                            | 4.298663  | 0.862914  | 2.447664  |
| O                            | 1.550461  | -4.346363 | 2.672795  |
| O                            | 4.936302  | 1.774119  | 2.974723  |
| C                            | 1.016031  | -3.348552 | 0.096165  |
| C                            | 1.396448  | -3.649937 | -1.213373 |
| C                            | -0.333974 | -3.459803 | 0.451929  |
| C                            | 0.438546  | -3.980879 | -2.165134 |
| C                            | -1.281199 | -3.790599 | -0.507302 |
| C                            | -0.908467 | -4.041284 | -1.825218 |
| H                            | -1.658222 | -4.267818 | -2.576392 |
| H                            | 2.444471  | -3.588517 | -1.482659 |
| H                            | -0.637827 | -3.243615 | 1.469458  |
| C                            | -2.741670 | -3.824845 | -0.163691 |
| C                            | 0.829069  | -4.259826 | -3.585083 |
| F                            | -3.446842 | -3.031576 | -0.997944 |
| F                            | -3.254701 | -5.058066 | -0.283740 |
| F                            | -2.983860 | -3.402613 | 1.084160  |
| F                            | 0.156339  | -3.461311 | -4.440649 |
| F                            | 0.548463  | -5.521466 | -3.941615 |
| F                            | 2.138414  | -4.060861 | -3.805843 |
| C                            | 3.848007  | 2.063601  | 0.444423  |
| C                            | 2.472780  | 2.650309  | 0.127224  |
| H                            | 4.394236  | 2.779727  | 1.071708  |
| C                            | 4.636957  | 1.874131  | -0.843879 |
| C                            | 2.522763  | 3.839186  | -0.807795 |
| H                            | 1.862918  | 1.853731  | -0.321568 |
| H                            | 1.973400  | 2.921296  | 1.065132  |
| H                            | 5.578247  | 1.356038  | -0.629650 |
| H                            | 4.062116  | 1.249330  | -1.536034 |
| C                            | 4.900503  | 3.227477  | -1.481990 |
| C                            | 3.662262  | 4.084655  | -1.591679 |
| C                            | 1.438322  | 4.738024  | -0.900408 |
| H                            | 5.643097  | 3.769562  | -0.878264 |

|    |           |           |           |
|----|-----------|-----------|-----------|
| H  | 5.349167  | 3.107765  | -2.475973 |
| C  | 3.689118  | 5.176104  | -2.463970 |
| C  | 1.495414  | 5.829805  | -1.772087 |
| C  | 0.218735  | 4.625904  | -0.070762 |
| C  | 2.615175  | 6.046606  | -2.563749 |
| H  | 4.579132  | 5.341025  | -3.067552 |
| H  | 0.641404  | 6.498742  | -1.839270 |
| C  | -0.597519 | 3.498104  | -0.009356 |
| C  | -0.234183 | 5.722817  | 0.672776  |
| H  | 2.647246  | 6.888471  | -3.249122 |
| N  | -1.731421 | 3.494103  | 0.697439  |
| H  | -0.360899 | 2.585892  | -0.548563 |
| N  | -1.367084 | 5.725964  | 1.371420  |
| H  | 0.357028  | 6.636824  | 0.699632  |
| C  | -2.079552 | 4.609671  | 1.347799  |
| H  | -3.025473 | 4.585310  | 1.877600  |
| Pd | -3.044423 | 1.780725  | 0.650475  |
| H  | -2.718716 | 1.552709  | 2.127855  |
| C  | -4.530549 | 3.142571  | -1.005226 |
| O  | -4.693062 | 3.418721  | 0.209031  |
| O  | -3.694360 | 2.255015  | -1.386238 |
| C  | -5.338413 | 3.848832  | -2.063890 |
| H  | -5.868870 | 4.702875  | -1.639608 |
| H  | -4.685979 | 4.172929  | -2.879753 |
| H  | -6.066872 | 3.148077  | -2.486352 |
| C  | 0.811350  | -0.458694 | -1.475287 |
| N  | 2.139998  | -0.645911 | -1.206937 |
| C  | 2.981822  | -0.844854 | -2.208463 |
| C  | 2.585322  | -0.844827 | -3.554534 |
| C  | 1.260481  | -0.636387 | -3.856633 |
| C  | 0.331588  | -0.443162 | -2.815856 |
| C  | -1.058084 | -0.274894 | -3.036358 |
| C  | -1.458854 | -0.232008 | -0.647191 |
| C  | -0.100569 | -0.336649 | -0.413397 |
| H  | 0.279867  | -0.371286 | 0.604783  |
| C  | -2.347073 | -0.196359 | 0.517818  |
| C  | -3.761151 | -0.182992 | 0.486611  |
| C  | -4.485479 | -0.649393 | 1.696568  |
| O  | -3.976873 | -0.890071 | 2.769187  |
| O  | -5.792073 | -0.778941 | 1.438877  |
| C  | -6.593818 | -1.207242 | 2.547102  |
| C  | -8.024406 | -1.270534 | 2.070531  |
| H  | -8.675792 | -1.595114 | 2.888365  |
| H  | -8.128514 | -1.980252 | 1.244015  |
| H  | -8.363152 | -0.288096 | 1.727600  |
| H  | -6.463336 | -0.497077 | 3.370284  |
| H  | -6.227916 | -2.180684 | 2.890133  |
| H  | -4.314896 | -0.232999 | -0.445600 |
| H  | -1.897616 | -0.511846 | 1.456921  |
| H  | -1.422729 | -0.243941 | -4.059138 |
| H  | 0.913769  | -0.645768 | -4.885896 |
| H  | 3.324900  | -1.023109 | -4.326634 |
| H  | 4.017201  | -1.019371 | -1.934459 |

C -1.931906 -0.174117 -1.987985  
 H -2.988716 -0.027883 -2.174543  
 93  
 T12\_C7\_TSI Eopt -3228.058521  
 Pd 1.926882 -1.461027 1.015559  
 C 3.225509 -1.271644 3.517928  
 C 1.283784 -2.605850 3.518887  
 C 3.426387 -1.503755 4.871549  
 C 1.422659 -2.867542 4.874184  
 H 4.277806 -1.038144 5.355873  
 H 0.677957 -3.486768 5.362424  
 N 2.186041 -1.837403 2.908645  
 H 2.645645 -2.507141 6.607551  
 C 2.513138 -2.313931 5.546960  
 N 0.342422 -2.739624 1.341342  
 N 3.577844 -0.290990 1.379106  
 C 0.159266 -3.098026 2.642697  
 C 4.059665 -0.372879 2.643195  
 O -0.759261 -3.751697 3.118541  
 O 5.034528 0.205117 3.121518  
 C -0.623197 -3.073433 0.383173  
 C -0.210583 -3.739144 -0.775356  
 C -1.963204 -2.688739 0.504658  
 C -1.101560 -3.964366 -1.815940  
 C -2.852993 -2.946250 -0.535501  
 C -2.431478 -3.569258 -1.705451  
 H -3.131178 -3.754132 -2.513242  
 C 0.310876 -0.462091 -1.280698  
 C 2.091528 -1.797821 -1.946474  
 C -0.367466 0.240166 -0.262522  
 C -0.244221 -0.500501 -2.591080  
 C 1.631575 -1.843375 -3.274061  
 H 2.984266 -2.339311 -1.651907  
 C -1.602988 0.817959 -0.496407  
 H 0.073310 0.264501 0.731782  
 C -1.502661 0.106890 -2.822068  
 C 0.459730 -1.205394 -3.592256  
 H 2.185956 -2.416091 -4.008338  
 H 0.049094 -1.258549 -4.596125  
 N 1.468176 -1.134342 -0.989224  
 H -1.934358 0.047245 -3.817557  
 H -2.324280 0.686574 0.504957  
 Pd -2.271977 2.781666 0.273986  
 C -4.385724 4.564668 0.889601  
 O -5.024954 5.576674 1.069326  
 O -3.083293 4.556113 0.696115  
 N -4.076838 2.139154 0.807603  
 C -4.225962 0.956390 1.381937  
 C -5.555814 0.562515 1.972050  
 H -5.567838 -0.519487 2.097818  
 H -6.390257 0.868597 1.335304  
 H -5.685581 1.035873 2.952217  
 O -3.273398 0.130733 1.442834

C -5.065666 3.194232 0.860159  
 H -5.725326 3.170836 -0.018882  
 H -5.702938 3.123245 1.747724  
 H 0.820222 -4.066210 -0.850036  
 H -2.301018 -2.169608 1.394004  
 C -4.282417 -2.497615 -0.429755  
 C -0.659366 -4.650290 -3.071971  
 F -4.449140 -1.235612 -0.876890  
 F -5.095978 -3.269959 -1.170532  
 F -4.730597 -2.534387 0.831039  
 F -0.980966 -3.923462 -4.163724  
 F -1.243390 -5.846530 -3.225666  
 F 0.670495 -4.844971 -3.108107  
 C 4.246164 0.630346 0.482631  
 C 3.242352 1.650482 -0.054201  
 H 5.007592 1.155331 1.073236  
 C 4.955866 -0.082727 -0.661355  
 C 3.701710 2.430557 -1.263327  
 H 2.325407 1.105625 -0.309908  
 H 2.961740 2.333646 0.756977  
 H 5.628415 -0.845356 -0.254207  
 H 4.216349 -0.592596 -1.288512  
 C 5.724212 0.923679 -1.503496  
 C 4.861236 2.071519 -1.965882  
 C 2.963298 3.548018 -1.702021  
 H 6.558672 1.325438 -0.909855  
 H 6.179627 0.435188 -2.373479  
 C 5.245020 2.807980 -3.090135  
 C 3.374311 4.281245 -2.815894  
 C 1.780924 4.025704 -0.948993  
 C 4.512810 3.905268 -3.519530  
 H 6.142622 2.511930 -3.628827  
 H 2.789482 5.140761 -3.133234  
 C 0.597422 3.303414 -0.821734  
 C 1.794850 5.268492 -0.311522  
 H 4.825968 4.468113 -4.393985  
 N -0.439723 3.765691 -0.112399  
 H 0.471664 2.338278 -1.297453  
 N 0.762113 5.746995 0.377584  
 H 2.684784 5.893962 -0.360436  
 C -0.313633 4.979947 0.456520  
 H -1.179540 5.347552 0.996050  
 C -2.183807 0.703174 -1.792306  
 H -3.182241 1.095619 -1.956499  
 101  
 T12\_C7\_TSII Eopt -3365.704102  
 Pd 1.132790 -2.128504 0.938972  
 C 2.047500 -2.479355 3.592418  
 C -0.174651 -3.157372 3.230852  
 C 1.977173 -2.844559 4.929896  
 C -0.314686 -3.533895 4.558664  
 H 2.852496 -2.694802 5.552486  
 H -1.269542 -3.928119 4.888912

|   |           |           |           |              |           |              |           |
|---|-----------|-----------|-----------|--------------|-----------|--------------|-----------|
| N | 0.985613  | -2.655428 | 2.810575  | H            | 6.438823  | -1.649801    | -1.484935 |
| H | 0.698332  | -3.667088 | 6.452732  | C            | 6.518385  | 0.918679     | -2.118202 |
| C | 0.780758  | -3.377696 | 5.409130  | C            | 5.215425  | 2.927868     | -2.092478 |
| N | -0.811160 | -2.852375 | 0.957493  | C            | 3.231310  | 3.182902     | -0.656761 |
| N | 3.000053  | -1.557054 | 1.613424  | C            | 6.304211  | 2.211052     | -2.573447 |
| C | -1.260437 | -3.212143 | 2.192911  | H            | 7.374392  | 0.352106     | -2.478516 |
| C | 3.235859  | -1.855544 | 2.915134  | H            | 5.031062  | 3.942452     | -2.436286 |
| O | -2.397335 | -3.545621 | 2.510510  | C            | 1.888490  | 2.819777     | -0.715839 |
| O | 4.262480  | -1.658190 | 3.564032  | C            | 3.484646  | 4.421299     | -0.060181 |
| C | -1.726997 | -2.731598 | -0.091380 | H            | 6.980105  | 2.660473     | -3.295113 |
| C | -1.375669 | -3.201790 | -1.360742 | N            | 0.923053  | 3.578114     | -0.190126 |
| C | -2.960229 | -2.084502 | 0.065373  | H            | 1.576598  | 1.899523     | -1.194527 |
| C | -2.197202 | -2.967820 | -2.455659 | N            | 2.529665  | 5.197470     | 0.445709  |
| C | -3.781719 | -1.873399 | -1.036285 | H            | 4.507357  | 4.787024     | 0.020319  |
| C | -3.406506 | -2.296270 | -2.307676 | C            | 1.287668  | 4.738184     | 0.378911  |
| H | -4.043964 | -2.106611 | -3.164802 | H            | 0.485019  | 5.313462     | 0.827188  |
| C | 0.543134  | -0.570484 | -1.588636 | C            | -0.852774 | 1.622765     | -2.638833 |
| C | 1.884440  | -2.448596 | -1.893995 | H            | -1.408060 | 2.471626     | -3.029663 |
| C | -0.235304 | 0.245148  | -0.740701 | Pd           | -1.168633 | 3.006146     | -0.032020 |
| C | 0.604922  | -0.279802 | -2.982940 | C            | -2.766141 | 1.404127     | -0.570432 |
| C | 1.968054  | -2.239943 | -3.278055 | C            | -3.147908 | 2.490422     | 0.269269  |
| H | 2.368068  | -3.303215 | -1.432388 | H            | -3.189405 | 1.386505     | -1.570847 |
| C | -0.928915 | 1.333021  | -1.245903 | H            | -2.688979 | 0.432552     | -0.098893 |
| H | -0.302638 | -0.013326 | 0.313988  | H            | -3.719126 | 3.317982     | -0.141696 |
| C | -0.097999 | 0.847775  | -3.477940 | C            | -3.308326 | 2.303623     | 1.732552  |
| C | 1.337560  | -1.145207 | -3.818114 | O            | -3.958189 | 3.035341     | 2.440923  |
| H | 2.521972  | -2.941900 | -3.890567 | O            | -2.635909 | 1.224681     | 2.184510  |
| H | 1.378458  | -0.945742 | -4.885176 | C            | -2.655305 | 1.051656     | 3.607243  |
| N | 1.220445  | -1.645859 | -1.077260 | C            | -1.872542 | -0.199001    | 3.924308  |
| H | -0.042421 | 1.071708  | -4.539954 | H            | -3.694715 | 0.983547     | 3.943137  |
| H | -0.446302 | -3.744280 | -1.480434 | H            | -2.215333 | 1.941947     | 4.068325  |
| H | -3.260804 | -1.732012 | 1.044087  | H            | -1.795614 | -0.324234    | 5.009494  |
| C | -5.097753 | -1.169199 | -0.870360 | H            | -2.360992 | -1.088653    | 3.515822  |
| C | -1.768561 | -3.383249 | -3.830775 | H            | -0.857889 | -0.133570    | 3.516053  |
| F | -5.293517 | -0.277465 | -1.862754 | C            | -2.282234 | 5.511488     | 0.594037  |
| F | -6.129788 | -2.021515 | -0.903381 | O            | -2.701663 | 5.408222     | -0.557348 |
| F | -5.165993 | -0.495470 | 0.288337  | O            | -1.472665 | 4.667391     | 1.167055  |
| F | -1.432425 | -2.310860 | -4.578740 | C            | -2.708541 | 6.644657     | 1.501912  |
| F | -2.748800 | -4.016126 | -4.489771 | H            | -3.198172 | 7.430918     | 0.924973  |
| F | -0.699750 | -4.195492 | -3.809884 | H            | -3.411867 | 6.242155     | 2.239400  |
| C | 4.082653  | -0.884940 | 0.917160  | H            | -1.853992 | 7.049775     | 2.051337  |
| C | 3.582551  | 0.402107  | 0.267374  | 101          |           |              |           |
| H | 4.830694  | -0.628050 | 1.677739  | T12_C7_TSIII | Eopt      | -3365.725120 |           |
| C | 4.768961  | -1.776445 | -0.110453 | Pd           | -0.651847 | 1.429582     | 1.675711  |
| C | 4.541825  | 1.028352  | -0.720111 | C            | -1.900274 | 0.369306     | 3.978355  |
| H | 3.321577  | 1.119972  | 1.054500  | C            | 0.432115  | 0.123976     | 3.940163  |
| H | 2.641096  | 0.169674  | -0.242063 | C            | -1.985657 | -0.282780    | 5.201395  |
| H | 5.059808  | -2.721568 | 0.360826  | C            | 0.419258  | -0.539145    | 5.159069  |
| H | 4.072155  | -2.009640 | -0.922666 | H            | -2.966785 | -0.434337    | 5.637869  |
| C | 5.982717  | -1.060507 | -0.680093 | H            | 1.360578  | -0.892211    | 5.565806  |
| C | 5.659229  | 0.322248  | -1.190908 | N            | -0.710467 | 0.558669     | 3.417152  |
| C | 4.334034  | 2.347203  | -1.178163 | H            | -0.844439 | -1.245798    | 6.751764  |
| H | 6.748947  | -0.974832 | 0.104518  | C            | -0.806545 | -0.730734    | 5.796192  |

|   |           |           |           |         |           |              |           |
|---|-----------|-----------|-----------|---------|-----------|--------------|-----------|
| N | 1.394271  | 1.154683  | 2.022780  | C       | -0.755842 | 3.744614     | -0.126100 |
| N | -2.698184 | 1.363761  | 1.961386  | C       | 0.374601  | 0.501542     | -1.226907 |
| C | 1.655468  | 0.372597  | 3.108894  | C       | 0.374774  | 2.666341     | -2.382160 |
| C | -3.068120 | 0.798986  | 3.140324  | C       | -0.486781 | 4.585829     | -1.218358 |
| O | 2.734141  | -0.094927 | 3.459873  | H       | -1.187885 | 4.140111     | 0.787277  |
| O | -4.209050 | 0.562726  | 3.540209  | C       | 1.028195  | -0.066732    | -2.303877 |
| C | 2.422448  | 1.402172  | 1.113970  | H       | 0.111291  | -0.098224    | -0.352846 |
| C | 2.515102  | 2.670007  | 0.525224  | C       | 1.014745  | 2.050913     | -3.482787 |
| C | 3.342027  | 0.417299  | 0.721041  | C       | 0.080842  | 4.045128     | -2.344805 |
| C | 3.449958  | 2.926451  | -0.468175 | H       | -0.711553 | 5.643696     | -1.142910 |
| C | 4.277042  | 0.691325  | -0.271047 | H       | 0.333055  | 4.666324     | -3.199462 |
| C | 4.336056  | 1.937530  | -0.885797 | N       | -0.501238 | 2.446794     | -0.130491 |
| H | 5.072508  | 2.141372  | -1.655367 | H       | 1.267227  | 2.656864     | -4.348021 |
| H | 1.841267  | 3.450100  | 0.859384  | C       | 1.338962  | 0.720383     | -3.440800 |
| H | 3.323905  | -0.553400 | 1.200182  | H       | 1.852767  | 0.257663     | -4.279028 |
| C | 5.193322  | -0.396634 | -0.747141 | Pd      | -0.143325 | -2.773200    | -1.469105 |
| C | 3.525287  | 4.272020  | -1.122207 | C       | 1.461856  | -1.484850    | -2.282009 |
| F | 4.645945  | -1.081361 | -1.776668 | C       | 1.799035  | -2.134687    | -1.070101 |
| F | 6.360855  | 0.090836  | -1.194082 | H       | 0.076380  | -2.256511    | -2.953073 |
| F | 5.466616  | -1.292855 | 0.211016  | H       | 1.978895  | -1.845921    | -3.169971 |
| F | 3.193465  | 4.203174  | -2.431031 | H       | 1.711397  | -1.604708    | -0.127626 |
| F | 4.765406  | 4.780949  | -1.075453 | C       | 2.768228  | -3.253495    | -1.113852 |
| F | 2.699194  | 5.167381  | -0.558149 | O       | 3.075357  | -3.879023    | -2.105621 |
| C | -3.774383 | 1.488491  | 0.997772  | O       | 3.284970  | -3.449080    | 0.101788  |
| C | -3.621788 | 0.443937  | -0.104592 | C       | 4.810404  | -4.435231    | 1.617464  |
| H | -4.701014 | 1.271378  | 1.544743  | H       | 5.612086  | -5.170881    | 1.738368  |
| C | -3.929912 | 2.859489  | 0.356703  | H       | 5.197612  | -3.449191    | 1.890131  |
| C | -4.729754 | 0.515096  | -1.130477 | H       | 3.998377  | -4.690187    | 2.305310  |
| H | -2.640445 | 0.597133  | -0.577638 | C       | -0.436939 | -2.745399    | 1.365989  |
| H | -3.581668 | -0.550360 | 0.353530  | O       | -0.258758 | -1.526641    | 1.222794  |
| H | -3.904564 | 3.644019  | 1.121508  | O       | -0.442167 | -3.611056    | 0.415486  |
| H | -3.103585 | 3.042794  | -0.339084 | C       | -0.647217 | -3.308825    | 2.756500  |
| C | -5.250881 | 2.899997  | -0.402435 | H       | -1.409331 | -2.721571    | 3.277597  |
| C | -5.490100 | 1.686001  | -1.272347 | H       | -0.935691 | -4.360861    | 2.730266  |
| C | -5.057206 | -0.604540 | -1.925352 | H       | 0.286569  | -3.204077    | 3.319646  |
| H | -6.076084 | 2.967841  | 0.321192  | C       | 4.322531  | -4.433202    | 0.189578  |
| H | -5.315720 | 3.805577  | -1.019011 | H       | 3.916053  | -5.403073    | -0.115324 |
| C | -6.533752 | 1.723202  | -2.201984 | H       | 5.114587  | -4.163850    | -0.516489 |
| C | -6.116984 | -0.551768 | -2.831678 | 93      |           |              |           |
| C | -4.295073 | -1.862592 | -1.795969 | T12_IN1 | Eopt      | -3228.072922 |           |
| C | -6.853488 | 0.617837  | -2.977044 | Pd      | 2.978416  | 0.456194     | -0.190192 |
| H | -7.111035 | 2.639769  | -2.304751 | C       | 5.522899  | 0.453232     | -1.437884 |
| H | -6.346443 | -1.425393 | -3.436499 | C       | 4.452333  | 2.546907     | -1.404623 |
| C | -2.913284 | -1.900792 | -1.948627 | C       | 6.611423  | 0.981948     | -2.117825 |
| C | -4.891216 | -3.092442 | -1.502549 | C       | 5.501269  | 3.133939     | -2.096865 |
| H | -7.670479 | 0.664591  | -3.691153 | H       | 7.433735  | 0.321128     | -2.369620 |
| N | -2.210366 | -3.021373 | -1.757478 | H       | 5.436101  | 4.189197     | -2.338970 |
| H | -2.349217 | -1.014388 | -2.218016 | N       | 4.509847  | 1.249226     | -1.105079 |
| N | -4.199002 | -4.219462 | -1.334621 | H       | 7.428454  | 2.774101     | -2.984833 |
| H | -5.971158 | -3.160719 | -1.381891 | C       | 6.591653  | 2.336785     | -2.448025 |
| C | -2.881835 | -4.134693 | -1.439002 | N       | 2.401048  | 2.439382     | -0.213406 |
| H | -2.288820 | -5.022058 | -1.246591 | N       | 4.149520  | -1.226135    | -0.461160 |
| C | 0.060595  | 1.873792  | -1.240740 | C       | 3.206696  | 3.257115     | -0.947292 |

|    |           |           |           |            |           |              |           |
|----|-----------|-----------|-----------|------------|-----------|--------------|-----------|
| C  | 5.360505  | -0.979723 | -1.017111 | H          | 4.650795  | -3.216591    | -0.551009 |
| O  | 3.027801  | 4.436859  | -1.220405 | C          | 4.324780  | -2.737008    | 1.480910  |
| O  | 6.279748  | -1.776974 | -1.202211 | C          | 1.953672  | -4.082319    | 0.650404  |
| C  | 1.204666  | 2.951443  | 0.306013  | H          | 1.867314  | -2.171096    | -0.277843 |
| C  | 0.938972  | 2.813147  | 1.672213  | H          | 2.493699  | -3.411579    | -1.324064 |
| C  | 0.230859  | 3.524081  | -0.514605 | H          | 5.367006  | -2.427299    | 1.609079  |
| C  | -0.295036 | 3.185246  | 2.189395  | H          | 3.706250  | -2.075172    | 2.100846  |
| C  | -1.000837 | 3.897337  | 0.015007  | C          | 4.128928  | -4.182525    | 1.915667  |
| C  | -1.281790 | 3.721801  | 1.364205  | C          | 2.705555  | -4.626099    | 1.700687  |
| H  | -2.257384 | 3.983000  | 1.758820  | C          | 0.608008  | -4.471121    | 0.509878  |
| C  | 0.017330  | 0.042731  | 0.131671  | H          | 4.810112  | -4.824465    | 1.337543  |
| C  | 1.240288  | -0.477839 | 2.038089  | H          | 4.401546  | -4.316259    | 2.968785  |
| C  | -0.030063 | 0.283709  | -1.274219 | C          | 2.113368  | -5.550481    | 2.565627  |
| C  | -1.177824 | 0.097264  | 0.890424  | C          | 0.028969  | -5.387427    | 1.386774  |
| C  | 0.091956  | -0.513327 | 2.835855  | C          | -0.221770 | -3.853146    | -0.547832 |
| H  | 2.219403  | -0.659475 | 2.466361  | C          | 0.788839  | -5.937619    | 2.413630  |
| C  | -1.200992 | 0.644762  | -1.873905 | H          | 2.707329  | -5.962753    | 3.378270  |
| H  | 0.895849  | 0.203405  | -1.837461 | H          | -1.012005 | -5.671146    | 1.255201  |
| C  | -2.390199 | 0.529884  | 0.257059  | C          | -1.227971 | -2.947751    | -0.230236 |
| C  | -1.118774 | -0.188338 | 2.264536  | C          | -0.046687 | -4.101082    | -1.911769 |
| H  | 0.181796  | -0.740458 | 3.891717  | H          | 0.344528  | -6.655446    | 3.096759  |
| C  | -2.397360 | 0.823614  | -1.107318 | N          | -1.946376 | -2.339190    | -1.177930 |
| H  | -1.219997 | 0.861271  | -2.937658 | H          | -1.453007 | -2.695140    | 0.800592  |
| H  | -2.025721 | -0.133469 | 2.858538  | N          | -0.776974 | -3.514729    | -2.858909 |
| N  | 1.215820  | -0.194612 | 0.740392  | H          | 0.706601  | -4.811065    | -2.247802 |
| H  | -3.220212 | 0.890803  | 0.860015  | C          | -1.696649 | -2.655264    | -2.454575 |
| H  | -3.237772 | 1.386748  | -1.500843 | H          | -2.307378 | -2.164499    | -3.205041 |
| Pd | -3.589958 | -1.129288 | -0.761585 | 92         |           |              |           |
| C  | -5.934367 | -2.675538 | -0.970338 | T12_T-Pd-P | Eopt      | -3010.123005 |           |
| O  | -6.678555 | -3.617495 | -1.130011 | Pd         | -2.535537 | -0.222261    | -0.501980 |
| O  | -4.624893 | -2.777717 | -1.088746 | C          | -4.316844 | 0.792571     | -2.443549 |
| N  | -5.393523 | -0.319542 | -0.463096 | C          | -3.597046 | -1.415754    | -2.838206 |
| C  | -5.684476 | 0.967034  | -0.184395 | C          | -5.099092 | 0.778008     | -3.590397 |
| C  | -7.155265 | 1.326953  | -0.042249 | C          | -4.348903 | -1.490135    | -4.001475 |
| H  | -7.212930 | 2.388290  | 0.200771  | H          | -5.661627 | 1.669862     | -3.844196 |
| H  | -7.642297 | 0.746024  | 0.748776  | H          | -4.312401 | -2.402318    | -4.587176 |
| H  | -7.707187 | 1.139021  | -0.970068 | N          | -3.621840 | -0.294176    | -2.117542 |
| O  | -4.835290 | 1.854960  | -0.038035 | H          | -5.713045 | -0.415280    | -5.272267 |
| C  | -6.458060 | -1.292274 | -0.621228 | C          | -5.112212 | -0.380096    | -4.368059 |
| H  | -7.055804 | -1.402155 | 0.294452  | N          | -2.168356 | -2.160048    | -1.096010 |
| H  | -7.158998 | -1.011351 | -1.419544 | N          | -3.261262 | 1.699394     | -0.510643 |
| H  | 1.704986  | 2.394845  | 2.315574  | C          | -2.683220 | -2.493957    | -2.310009 |
| H  | 0.433308  | 3.648277  | -1.572211 | C          | -4.126034 | 1.966825     | -1.519863 |
| C  | -2.027831 | 4.488272  | -0.908055 | O          | -2.483430 | -3.516150    | -2.952948 |
| C  | -0.594037 | 3.021440  | 3.648776  | O          | -4.715018 | 3.020882     | -1.757141 |
| F  | -2.142689 | 3.752661  | -2.035227 | C          | -1.186836 | -2.963557    | -0.500451 |
| F  | -3.235592 | 4.558686  | -0.345632 | C          | -1.421899 | -3.509718    | 0.763108  |
| F  | -1.681983 | 5.725556  | -1.295296 | C          | 0.081447  | -3.101720    | -1.071997 |
| F  | -1.766496 | 2.379638  | 3.836877  | C          | -0.393868 | -4.132142    | 1.462063  |
| F  | -0.698020 | 4.200478  | 4.275418  | C          | 1.104416  | -3.721455    | -0.363438 |
| F  | 0.351171  | 2.309401  | 4.286998  | C          | 0.878952  | -4.235236    | 0.909758  |
| C  | 3.950769  | -2.584298 | 0.009566  | H          | 1.690291  | -4.683483    | 1.472856  |
| C  | 2.524458  | -3.047131 | -0.289710 | C          | 0.035474  | -0.402764    | 1.011289  |

|   |           |           |           |             |           |              |           |
|---|-----------|-----------|-----------|-------------|-----------|--------------|-----------|
| C | -1.844275 | -0.697594 | 2.345227  | H           | 3.638100  | 3.770611     | -2.596561 |
| C | 0.605854  | -0.021957 | -0.224559 | C           | 4.275097  | -0.538865    | 0.440742  |
| C | 0.885308  | -0.858798 | 2.058057  | C           | 4.934733  | 0.264774     | -0.405129 |
| C | -1.071777 | -1.135531 | 3.432434  | H           | 4.858874  | -1.221699    | 1.055995  |
| H | -2.925632 | -0.641901 | 2.416626  | H           | 4.430500  | 1.019542     | -1.002771 |
| C | 1.960304  | -0.083238 | -0.408041 | C           | 6.404715  | 0.180007     | -0.497206 |
| H | -0.054245 | 0.311438  | -1.020912 | O           | 7.109691  | -0.573620    | 0.140066  |
| C | 2.277258  | -0.929101 | 1.828690  | O           | 6.874374  | 1.062091     | -1.394013 |
| C | 0.289715  | -1.232480 | 3.282387  | C           | 8.296336  | 1.062488     | -1.564303 |
| H | -1.564423 | -1.422076 | 4.354243  | C           | 8.627252  | 2.108203     | -2.601518 |
| C | 2.828209  | -0.525910 | 0.627764  | H           | 8.616261  | 0.060783     | -1.870475 |
| H | 2.384448  | 0.210393  | -1.360353 | H           | 8.768195  | 1.274244     | -0.598835 |
| H | 0.915305  | -1.604826 | 4.088213  | H           | 9.709280  | 2.144087     | -2.763792 |
| N | -1.318880 | -0.352709 | 1.180072  | H           | 8.143045  | 1.877586     | -3.555452 |
| H | 2.920793  | -1.286286 | 2.628873  | H           | 8.294060  | 3.098631     | -2.276380 |
| H | -2.407862 | -3.407073 | 1.202383  |             |           |              | 79        |
| H | 0.271985  | -2.671070 | -2.048240 | Tl2_T-Pd-SM | Eopt      | -2665.898391 |           |
| C | 2.477964  | -3.818622 | -0.961185 | Pd          | 0.113540  | 1.732671     | 0.276542  |
| C | -0.634838 | -4.695461 | 2.829983  | C           | 1.329160  | 4.143283     | -0.555950 |
| F | 2.698531  | -2.847813 | -1.862763 | C           | -0.961741 | 3.975026     | -1.075924 |
| F | 3.430625  | -3.712896 | -0.016448 | C           | 1.403535  | 5.400852     | -1.139492 |
| F | 2.672027  | -4.989977 | -1.583680 | C           | -0.951261 | 5.221486     | -1.684304 |
| F | -0.700162 | -6.033868 | 2.818993  | H           | 2.359388  | 5.913280     | -1.143109 |
| F | -1.779531 | -4.244177 | 3.370957  | H           | -1.869766 | 5.592121     | -2.126361 |
| F | 0.361648  | -4.363825 | 3.677090  | N           | 0.163857  | 3.501494     | -0.540414 |
| C | -2.942218 | 2.799723  | 0.375319  | H           | 0.279612  | 6.918534     | -2.170542 |
| C | -1.446006 | 3.102463  | 0.353297  | C           | 0.246650  | 5.938211     | -1.703935 |
| H | -3.483019 | 3.676564  | -0.003627 | N           | -1.868759 | 1.950140     | -0.237767 |
| C | -3.389211 | 2.557022  | 1.811097  | N           | 2.114810  | 2.153334     | 0.489306  |
| C | -1.030540 | 4.150041  | 1.361492  | C           | -2.150126 | 3.050635     | -0.986003 |
| H | -0.907949 | 2.165121  | 0.547201  | C           | 2.479307  | 3.381821     | 0.047529  |
| H | -1.154585 | 3.413573  | -0.656799 | O           | -3.206361 | 3.332131     | -1.537220 |
| H | -4.432874 | 2.224210  | 1.825664  | O           | 3.597042  | 3.896486     | 0.067722  |
| H | -2.779097 | 1.758895  | 2.252651  | C           | -2.810108 | 0.919806     | -0.120630 |
| C | -3.224902 | 3.840184  | 2.612420  | C           | -3.202681 | 0.164948     | -1.229302 |
| C | -1.873366 | 4.490904  | 2.430328  | C           | -3.256382 | 0.541718     | 1.147599  |
| C | 0.201455  | 4.823543  | 1.226264  | C           | -3.977308 | -0.976372    | -1.058407 |
| H | -4.000191 | 4.555224  | 2.300599  | C           | -4.032642 | -0.600204    | 1.307992  |
| H | -3.397513 | 3.655740  | 3.680232  | C           | -4.392452 | -1.373409    | 0.208684  |
| C | -1.481035 | 5.483829  | 3.332784  | H           | -4.964854 | -2.285356    | 0.338961  |
| C | 0.562035  | 5.825594  | 2.128796  | C           | -0.440467 | -1.217441    | 0.278412  |
| C | 1.147013  | 4.507645  | 0.132265  | C           | -0.366974 | -0.269456    | 2.401433  |
| C | -0.277202 | 6.156209  | 3.186473  | C           | -0.198540 | -1.118394    | -1.109475 |
| H | -2.144548 | 5.733499  | 4.158233  | C           | -0.998486 | -2.416225    | 0.808148  |
| H | 1.516971  | 6.330128  | 2.006364  | C           | -0.887456 | -1.427661    | 3.000084  |
| C | 1.744888  | 3.255121  | -0.019365 | H           | -0.132789 | 0.606147     | 2.998147  |
| C | 1.551247  | 5.469427  | -0.797579 | C           | -0.524304 | -2.161606    | -1.942351 |
| H | 0.011369  | 6.929019  | 3.893158  | H           | 0.246465  | -0.205140    | -1.495475 |
| N | 2.622521  | 2.980347  | -0.984135 | C           | -1.331259 | -3.467958    | -0.078576 |
| H | 1.513216  | 2.446792  | 0.670796  | C           | -1.217430 | -2.493141    | 2.199996  |
| N | 2.432997  | 5.222926  | -1.765742 | H           | -1.053110 | -1.445240    | 4.070944  |
| H | 1.137431  | 6.476380  | -0.755758 | H           | -0.312347 | -2.088078    | -3.002518 |
| C | 2.919009  | 3.985333  | -1.808454 | H           | -1.661106 | -3.390821    | 2.620587  |

N -0.154478 -0.160190 1.100133  
 H -1.773127 -4.372871 0.329404  
 H -2.852549 0.449728 -2.214586  
 H -2.958467 1.134228 2.005349  
 C -4.490889 -1.026391 2.669788  
 C -4.357714 -1.805760 -2.249302  
 F -5.798219 -0.796384 2.855656  
 F -4.301518 -2.349317 2.856871  
 F -3.829837 -0.390187 3.651754  
 F -4.405277 -3.114891 -1.940703  
 F -3.479999 -1.664755 -3.256611  
 F -5.565627 -1.472823 -2.727330  
 C 3.175916 1.314026 1.006467  
 C 3.255270 0.004421 0.228739  
 H 4.113587 1.866637 0.864323  
 C 3.029438 1.014346 2.493000  
 C 4.241738 -0.983661 0.808184  
 H 2.250430 -0.437603 0.214243  
 H 3.504468 0.219794 -0.816850  
 H 2.856615 1.944058 3.046119  
 H 2.157940 0.366291 2.649501  
 C 4.287140 0.318529 2.992921  
 C 4.719288 -0.835871 2.119093  
 C 4.719992 -2.056541 0.026746  
 H 5.106432 1.051270 3.031978  
 H 4.151217 -0.036205 4.022342  
 C 5.649317 -1.748871 2.624786  
 C 5.663340 -2.943901 0.547839  
 C 4.260456 -2.267148 -1.363170  
 C 6.127205 -2.794797 1.849699  
 H 6.006208 -1.622910 3.644953  
 H 6.015757 -3.765567 -0.070355  
 C 2.921900 -2.475824 -1.702943  
 C 5.153365 -2.309812 -2.437279  
 H 6.852787 -3.493918 2.255591  
 N 2.510953 -2.676835 -2.953811  
 H 2.152744 -2.490040 -0.933404  
 N 4.770803 -2.520116 -3.696108  
 H 6.218905 -2.158495 -2.267200  
 C 3.463913 -2.685073 -3.885740  
 H 3.138626 -2.847336 -4.911617  
 C -1.103718 -3.341261 -1.425899  
 H -1.367293 -4.147851 -2.102222  
 80  
 T12\_TC-Pd-P Eopt -3264.856887  
 Pd -1.545799 1.567557 -0.005409  
 C -3.450696 3.400693 -1.003479  
 C -1.359999 4.352828 -0.496300  
 C -3.958624 4.633858 -1.386825  
 C -1.800821 5.611962 -0.879359  
 H -4.988371 4.690021 -1.722757  
 H -1.110043 6.445792 -0.817083  
 N -2.189846 3.315713 -0.581970

H -3.487835 6.720019 -1.625188  
 C -3.116282 5.744708 -1.324921  
 N 0.118228 2.731259 0.430910  
 N -3.420936 1.045066 -0.666802  
 C 0.018532 4.025785 0.010466  
 C -4.209841 2.100727 -1.022719  
 O 0.888321 4.887941 0.022173  
 O -5.386702 2.080919 -1.359883  
 C 1.364024 2.238650 0.834521  
 C 2.531619 2.471293 0.100426  
 C 1.429632 1.389804 1.945366  
 C 3.706391 1.802776 0.429393  
 C 2.608804 0.730268 2.262926  
 C 3.758077 0.916618 1.498518  
 H 4.668725 0.374186 1.724116  
 C 0.178927 -0.920151 0.346649  
 C -1.723369 -0.810682 1.679524  
 C 0.969086 -0.395582 -0.701171  
 C 0.617451 -2.089307 1.028355  
 C -1.385326 -1.989588 2.358464  
 H -2.634533 -0.272196 1.919179  
 C 2.191968 -0.941245 -0.979424  
 H 0.601639 0.467631 -1.248359  
 C 1.875251 -2.640743 0.701140  
 C -0.207172 -2.619665 2.042396  
 H -2.047500 -2.367350 3.129046  
 H 2.802287 -0.500662 -1.760262  
 H 0.106923 -3.517140 2.567893  
 N -0.970664 -0.288310 0.721216  
 H 2.222460 -3.510373 1.252825  
 H 2.506602 3.150052 -0.744064  
 H 0.531536 1.222718 2.529905  
 C 2.664457 -0.186167 3.448554  
 C 4.894749 1.982947 -0.466912  
 F 3.237288 0.402856 4.508636  
 F 1.439159 -0.587048 3.832759  
 F 3.381383 -1.292542 3.181934  
 F 5.188459 3.273356 -0.661500  
 F 4.652133 1.457004 -1.693659  
 F 5.990238 1.374872 0.005465  
 C 2.688717 -2.059213 -0.251253  
 C -3.937576 -0.253715 -0.680011  
 C -3.123368 -1.290331 -1.145138  
 C -5.211750 -0.570703 -0.189335  
 C -3.544347 -2.612063 -1.073213  
 H -2.147667 -1.048699 -1.553580  
 C -5.628024 -1.896527 -0.143345  
 H -5.867079 0.220811 0.151096  
 C -4.799715 -2.931496 -0.569475  
 H -5.127229 -3.962707 -0.510956  
 C -2.584231 -3.689515 -1.478092  
 C -7.013555 -2.213092 0.341443  
 F -7.078751 -3.440717 0.884066

F -7.426213 -1.337823 1.271772  
 F -7.906174 -2.176768 -0.659393  
 F -1.914712 -3.366219 -2.594766  
 F -3.195505 -4.862278 -1.690109  
 F -1.656117 -3.894468 -0.519358  
 C 4.035526 -2.577368 -0.451103  
 C 5.042540 -1.943448 -1.069918  
 H 4.259090 -3.550851 -0.016394  
 H 4.952983 -0.951879 -1.500437  
 C 6.368043 -2.588390 -1.144486  
 O 6.644315 -3.683184 -0.701062  
 O 7.245165 -1.791984 -1.772685  
 C 8.573889 -2.314334 -1.890412  
 H 8.534638 -3.258432 -2.444283  
 H 8.954622 -2.539392 -0.888529  
 C 9.407272 -1.272507 -2.596407  
 H 9.424075 -0.337654 -2.027919  
 H 10.436346 -1.629327 -2.706173  
 H 9.006557 -1.062379 -3.592786  
 67  
 T12\_TC-Pd-SM Eopt -2920.631879  
 Pd -0.218894 1.439190 0.126181  
 C -1.581444 3.892722 -0.192157  
 C 0.752076 4.096636 0.045937  
 C -1.727064 5.269820 -0.285808  
 C 0.677125 5.478576 -0.057269  
 H -2.723279 5.680397 -0.409648  
 H 1.594355 6.055088 -0.005345  
 N -0.364811 3.375728 -0.031301  
 H -0.666572 7.141894 -0.297722  
 C -0.580066 6.062047 -0.220600  
 N 1.752691 1.972989 0.431348  
 N -2.237709 1.604021 -0.233926  
 C 2.014934 3.296667 0.232649  
 C -2.701362 2.887635 -0.263809  
 O 3.106065 3.851995 0.214158  
 O -3.860756 3.268710 -0.365911  
 C 2.805476 1.060660 0.551825  
 C 3.894860 1.053144 -0.324801  
 C 2.706602 0.047572 1.511609  
 C 4.814803 0.010997 -0.280197  
 C 3.628848 -0.988170 1.542172  
 C 4.686922 -1.024735 0.637780  
 H 5.399451 -1.842116 0.650698  
 C 0.696023 -1.415583 -0.384781  
 C -0.751982 -1.128707 1.415916  
 C 1.375654 -0.878181 -1.498952  
 C 0.864234 -2.790768 -0.057051  
 C -0.649179 -2.476788 1.788376  
 H -1.384594 -0.444426 1.972503  
 C 2.223899 -1.670914 -2.232166  
 H 1.231520 0.170968 -1.740937  
 C 1.735628 -3.582789 -0.841646

C 0.169313 -3.302077 1.058427  
 H -1.205638 -2.835437 2.646631  
 H 2.773820 -1.243113 -3.063952  
 H 0.292498 -4.347599 1.326589  
 N -0.097902 -0.612536 0.387218  
 H 1.867331 -4.628313 -0.578416  
 H 4.003596 1.849488 -1.051278  
 H 1.877125 0.065963 2.209028  
 C 3.492395 -2.104055 2.534020  
 C 5.882811 -0.057897 -1.330582  
 F 4.546265 -2.168376 3.360733  
 F 2.390839 -1.981781 3.291556  
 F 3.416059 -3.299537 1.914596  
 F 6.327904 1.155958 -1.678013  
 F 5.411126 -0.637616 -2.456281  
 F 6.936597 -0.785463 -0.932923  
 C 2.409625 -3.031692 -1.901214  
 H 3.089759 -3.637813 -2.491468  
 C -3.127015 0.531106 -0.338765  
 C -2.739841 -0.583850 -1.088899  
 C -4.364482 0.498861 0.318758  
 C -3.538789 -1.718532 -1.140802  
 H -1.799084 -0.553649 -1.627876  
 C -5.163097 -0.636881 0.240917  
 H -4.694343 1.361749 0.882836  
 C -4.758749 -1.759979 -0.475204  
 H -5.382276 -2.645384 -0.514977  
 C -3.025397 -2.928693 -1.860780  
 C -6.507136 -0.634164 0.910328  
 F -6.884981 -1.873805 1.266159  
 F -6.508916 0.122397 2.019057  
 F -7.460519 -0.149741 0.099765  
 F -2.339588 -2.600086 -2.966133  
 F -4.012022 -3.760423 -2.221889  
 F -2.181283 -3.635909 -1.079930  
 99  
 cis-T25\_C5\_IN2 Eopt -2806.643600  
 Pd -2.570991 0.616488 0.226577  
 C -3.661758 2.832084 -1.175533  
 C -5.061104 0.946102 -1.062226  
 C -4.583833 3.511218 -1.961346  
 C -6.026546 1.570977 -1.838094  
 H -4.340452 4.515158 -2.291548  
 H -6.932275 1.023483 -2.075780  
 N -3.944526 1.604200 -0.749783  
 H -6.519142 3.381360 -2.893470  
 C -5.779533 2.869842 -2.284008  
 N -3.994223 -0.821524 0.098670  
 N -1.629875 2.524226 0.049488  
 C -5.136559 -0.468122 -0.548326  
 C -2.341055 3.379297 -0.715174  
 O -6.136483 -1.147614 -0.736336  
 O -2.035688 4.538710 -1.022694



C -3.846526 -2.118565 0.597123  
C -3.692855 -2.329299 1.976692  
C -3.771926 -3.221900 -0.269889  
C -3.477595 -3.612110 2.482840  
C -3.570532 -4.509281 0.232024  
C -3.425843 -4.687273 1.602361  
H -3.266350 -5.687688 1.994455  
C -0.523918 3.173858 0.739600  
C 0.688578 3.544879 -0.155808  
H -0.898208 4.146987 1.095932  
C -0.058881 2.388302 1.946807  
C 1.864861 4.054711 0.657306  
H 0.329852 4.362355 -0.790402  
H -0.934784 2.052842 2.512453  
H 0.487153 1.497932 1.618226  
C 0.836507 3.248062 2.823928  
C 1.953796 3.891577 2.044566  
H 0.228185 4.033211 3.297267  
H 1.256253 2.652483 3.645052  
C 3.094318 4.351528 2.712353  
C 4.043487 5.131511 0.646564  
C 1.120730 2.441629 -1.090666  
C 4.133688 4.964763 2.027967  
H 3.161052 4.216521 3.790212  
H 4.851570 5.604069 0.095928  
C 2.088090 1.499221 -0.741366  
C 0.577197 2.357671 -2.372685  
H 5.014366 5.305563 2.565038  
N 2.498096 0.535695 -1.576841  
H 2.562805 1.519629 0.233588  
H -0.184401 3.073529 -2.671376  
C 2.004211 0.495721 -2.821296  
H 2.388793 -0.285798 -3.465200  
H -3.362712 -3.781580 3.546947  
H -3.518315 -5.364278 -0.431565  
O -3.758361 -1.211357 2.745853  
O -3.878178 -2.927477 -1.587029  
C -3.669787 -1.376342 4.138755  
H -2.697400 -1.794218 4.437842  
H -3.781544 -0.378773 4.567736  
H -4.468233 -2.025038 4.521007  
C -3.825036 -3.993670 -2.502099  
H -3.947282 -3.547027 -3.490278  
H -2.860349 -4.517415 -2.455012  
H -4.636525 -4.711550 -2.329095  
C 2.916956 4.678889 -0.023758  
H 2.846734 4.795320 -1.103159  
C 1.039247 1.389776 -3.254947  
H 0.658443 1.320156 -4.268404  
C -0.332464 -1.270410 -0.006519  
C -0.631136 -0.603026 2.197245  
C -0.910506 -1.611388 -1.251434  
C 1.032006 -1.567441 0.242280

C 0.662886 -1.021554 2.578205  
H -1.297659 -0.152496 2.925278  
C -0.134543 -2.231734 -2.200382  
H -1.968266 -1.432685 -1.414276  
C 1.875637 -1.970481 -0.840164  
H -0.588594 -2.556966 -3.133108  
C 1.260909 -2.366738 -2.013288  
H 1.866671 -2.718706 -2.846767  
Pd 3.690062 -1.028416 -0.889260  
C 6.469693 -0.468869 -0.572189  
O 7.574407 0.039032 -0.525985  
O 5.380284 0.107017 -0.973564  
N 4.975957 -2.438292 -0.225819  
C 4.709172 -3.668042 0.055018  
C 5.733958 -4.653470 0.517498  
H 6.487101 -4.810800 -0.262301  
H 5.253601 -5.603929 0.750709  
H 6.257783 -4.278894 1.402716  
O 3.494143 -4.156787 -0.048183  
C 6.338451 -1.931500 -0.112010  
H 7.030387 -2.531316 -0.715640  
C 1.508287 -1.413048 1.564336  
H 2.553010 -1.639244 1.767806  
N -1.080755 -0.650496 0.960817  
H 6.685182 -1.981751 0.927980  
H 2.890806 -3.420360 -0.374310  
C 1.083539 -0.930504 4.013830  
H 0.567642 -1.679568 4.626886  
H 2.159272 -1.095805 4.119535  
H 0.849277 0.053969 4.435719  
107  
cis-T25\_C5\_IN3 Eopt -2944.280624  
Pd -2.757856 0.671841 0.430655  
C -3.814090 3.147377 -0.481019  
C -5.356475 1.374603 -0.420199  
C -4.769011 4.004430 -1.013070  
C -6.357128 2.178868 -0.945652  
H -4.480134 5.027092 -1.229444  
H -7.335386 1.741848 -1.114769  
N -4.148448 1.892487 -0.195967  
H -6.818605 4.160008 -1.650243  
C -6.052818 3.508770 -1.238304  
N -4.320561 -0.616228 0.336001  
N -1.661254 2.511795 0.352176  
C -5.498008 -0.088291 -0.090291  
C -2.396795 3.522970 -0.156323  
O -6.575489 -0.654590 -0.217922  
O -2.039220 4.694706 -0.336054  
C -4.238799 -1.976662 0.645349  
C -3.939146 -2.383984 1.955056  
C -4.378542 -2.954536 -0.353603  
C -3.786504 -3.736622 2.263976  
C -4.241131 -4.309977 -0.047694

|   |           |           |           |                     |              |           |           |
|---|-----------|-----------|-----------|---------------------|--------------|-----------|-----------|
| C | -3.946040 | -4.683019 | 1.257818  | H                   | -1.451915    | -2.226034 | -3.496755 |
| H | -3.834892 | -5.736726 | 1.497440  | C                   | 0.522161     | -2.287467 | -2.602637 |
| C | -0.393653 | 2.969671  | 0.908197  | H                   | 1.003886     | -2.562770 | -3.538624 |
| C | 0.659844  | 3.396312  | -0.145799 | C                   | 1.254101     | -1.778792 | 1.008092  |
| H | -0.602711 | 3.896657  | 1.466150  | H                   | 2.291663     | -2.094535 | 1.073996  |
| C | 0.214308  | 1.969502  | 1.866992  | N                   | -1.325847    | -0.794962 | 0.814949  |
| C | 1.978835  | 3.777238  | 0.498494  | Pd                  | 3.149668     | -1.330615 | -1.542572 |
| H | 0.239581  | 4.283273  | -0.630769 | C                   | 3.399826     | -3.538685 | -1.451544 |
| H | -0.560520 | 1.622824  | 2.558496  | C                   | 4.562158     | -2.897848 | -1.061741 |
| H | 0.570086  | 1.097560  | 1.310594  | H                   | 2.754965     | -3.972944 | -0.694432 |
| C | 1.363109  | 2.590107  | 2.649489  | H                   | 3.258939     | -3.873698 | -2.474080 |
| C | 2.330855  | 3.357180  | 1.785273  | H                   | 5.364841     | -2.682027 | -1.760515 |
| H | 0.952724  | 3.275072  | 3.406430  | C                   | 4.882040     | -2.767871 | 0.388770  |
| H | 1.906305  | 1.812471  | 3.201064  | O                   | 4.140729     | -3.110234 | 1.288291  |
| C | 3.596507  | 3.685062  | 2.283640  | O                   | 6.094686     | -2.254260 | 0.564692  |
| C | 4.142055  | 4.855904  | 0.255531  | C                   | 6.418677     | -1.901168 | 1.919297  |
| C | 0.894690  | 2.371416  | -1.227443 | C                   | 7.822141     | -1.347636 | 1.914453  |
| C | 4.498065  | 4.426543  | 1.534293  | H                   | 6.325175     | -2.791069 | 2.549559  |
| H | 3.872227  | 3.343630  | 3.279161  | H                   | 5.682188     | -1.160376 | 2.245343  |
| H | 4.835622  | 5.442505  | -0.340904 | H                   | 8.108063     | -1.053911 | 2.929648  |
| C | 1.806479  | 1.325986  | -1.064618 | H                   | 8.538537     | -2.093798 | 1.556623  |
| C | 0.229592  | 2.461024  | -2.448553 | H                   | 7.887622     | -0.466633 | 1.269130  |
| H | 5.476470  | 4.667392  | 1.941093  | C                   | 4.989775     | 0.418190  | -0.400903 |
| N | 2.048375  | 0.426289  | -2.025725 | O                   | 4.253889     | 0.167905  | 0.567302  |
| H | 2.380597  | 1.197667  | -0.151465 | O                   | 4.881047     | -0.132665 | -1.560065 |
| H | -0.497002 | 3.255357  | -2.599821 | C                   | 6.072210     | 1.469429  | -0.291527 |
| C | 1.441268  | 0.549940  | -3.212777 | H                   | 6.377776     | 1.586994  | 0.750465  |
| H | 1.688972  | -0.193007 | -3.961560 | H                   | 6.928652     | 1.226282  | -0.924924 |
| H | -3.556989 | -4.057331 | 3.273246  | H                   | 5.656587     | 2.426907  | -0.625574 |
| H | -4.353016 | -5.068461 | -0.813413 | C                   | 1.163404     | -1.578357 | 3.520054  |
| O | -3.805494 | -1.379572 | 2.859402  | H                   | 0.647282     | -2.335010 | 4.123652  |
| O | -4.617658 | -2.476483 | -1.597966 | H                   | 2.216409     | -1.863325 | 3.448423  |
| C | -3.545513 | -1.738346 | 4.193243  | H                   | 1.100621     | -0.627783 | 4.063357  |
| H | -2.584915 | -2.264224 | 4.292764  | 107                 |              |           |           |
| H | -3.504782 | -0.802594 | 4.753955  | cis-T25_C5_IN4 Eopt | -2944.334563 |           |           |
| H | -4.342351 | -2.371036 | 4.604846  | Pd                  | -2.757313    | 0.566387  | 0.215422  |
| C | -4.770915 | -3.409499 | -2.637941 | C                   | -4.347764    | 2.676912  | -0.823047 |
| H | -4.967528 | -2.825262 | -3.538541 | C                   | -5.486346    | 0.642533  | -0.522321 |
| H | -3.859562 | -4.006299 | -2.781665 | C                   | -5.481610    | 3.272547  | -1.359630 |
| H | -5.618556 | -4.081392 | -2.453118 | C                   | -6.655567    | 1.179166  | -1.042001 |
| C | 2.893588  | 4.525712  | -0.251476 | H                   | -5.419732    | 4.307295  | -1.678351 |
| H | 2.612001  | 4.844998  | -1.252865 | H                   | -7.530115    | 0.541255  | -1.111239 |
| C | 0.523355  | 1.556040  | -3.462225 | N                   | -4.402024    | 1.410805  | -0.419363 |
| H | 0.044639  | 1.619933  | -4.433823 | H                   | -7.547915    | 2.954337  | -1.870247 |
| C | -0.747231 | -1.340837 | -0.301255 | C                   | -6.645669    | 2.510566  | -1.458901 |
| C | -0.733820 | -0.923989 | 1.985658  | N                   | -4.024590    | -1.025508 | 0.308338  |
| C | -1.488478 | -1.495761 | -1.495677 | N                   | -2.091295    | 2.560072  | -0.038693 |
| C | 0.612133  | -1.745750 | -0.251026 | C                   | -5.305684    | -0.784292 | -0.075437 |
| C | 0.557091  | -1.465774 | 2.153932  | C                   | -3.022137    | 3.351951  | -0.620558 |
| H | -1.276865 | -0.519274 | 2.833744  | O                   | -6.248825    | -1.564297 | -0.089855 |
| C | -0.873294 | -2.044912 | -2.594305 | O                   | -2.897076    | 4.537582  | -0.945004 |
| H | -2.541059 | -1.233200 | -1.508262 | C                   | -3.643372    | -2.316526 | 0.683254  |
| C | 1.271664  | -2.052540 | -1.476158 | C                   | -3.170080    | -2.561625 | 1.982658  |

|   |           |           |           |                     |              |           |           |
|---|-----------|-----------|-----------|---------------------|--------------|-----------|-----------|
| C | -3.639602 | -3.368704 | -0.248655 | C                   | -0.706543    | -2.542244 | -2.350320 |
| C | -2.687035 | -3.821363 | 2.340880  | H                   | -2.197364    | -1.191690 | -1.600740 |
| C | -3.177986 | -4.636218 | 0.111119  | C                   | 1.283243     | -2.876993 | -0.994026 |
| C | -2.701716 | -4.844438 | 1.399444  | H                   | -1.255075    | -2.761523 | -3.262072 |
| H | -2.332861 | -5.827568 | 1.677633  | C                   | 0.560844     | -3.122710 | -2.141078 |
| C | -0.920212 | 3.305995  | 0.386721  | H                   | 0.996659     | -3.751376 | -2.914524 |
| C | 0.110799  | 3.550461  | -0.739490 | C                   | 1.298692     | -1.875539 | 1.287429  |
| H | -1.268258 | 4.315617  | 0.652127  | H                   | 2.230491     | -2.379138 | 1.525955  |
| C | -0.233232 | 2.718596  | 1.603769  | N                   | -1.070656    | -0.552071 | 0.694927  |
| C | 1.291082  | 4.351186  | -0.226720 | Pd                  | 3.459322     | -0.507361 | -0.157597 |
| H | -0.413976 | 4.141916  | -1.498646 | C                   | 2.715513     | -3.314105 | -0.884074 |
| H | -0.989268 | 2.466719  | 2.356541  | C                   | 3.686582     | -2.198622 | -1.274008 |
| H | 0.281950  | 1.791263  | 1.335099  | H                   | 2.975618     | -3.666569 | 0.118530  |
| C | 0.763914  | 3.717417  | 2.178836  | H                   | 2.883081     | -4.174304 | -1.547185 |
| C | 1.623986  | 4.384764  | 1.132779  | H                   | 3.572571     | -1.893123 | -2.319105 |
| H | 0.213036  | 4.498883  | 2.722532  | C                   | 5.102773     | -2.605204 | -1.025257 |
| H | 1.408971  | 3.225368  | 2.917490  | O                   | 5.452183     | -3.559218 | -0.364533 |
| C | 2.769181  | 5.083932  | 1.529958  | O                   | 5.967916     | -1.760409 | -1.618426 |
| C | 3.230222  | 5.717651  | -0.743836 | C                   | 7.345882     | -1.985309 | -1.310755 |
| C | 0.586703  | 2.278953  | -1.398502 | C                   | 8.135605     | -0.860825 | -1.936551 |
| C | 3.569180  | 5.744444  | 0.608604  | H                   | 7.645993     | -2.964957 | -1.699399 |
| H | 3.032490  | 5.101790  | 2.585530  | H                   | 7.461230     | -2.012815 | -0.222335 |
| H | 3.845617  | 6.233672  | -1.475477 | H                   | 9.202548     | -0.987007 | -1.725076 |
| C | 1.656115  | 1.554591  | -0.876733 | H                   | 7.998663     | -0.843839 | -3.022434 |
| C | -0.007971 | 1.786970  | -2.560460 | H                   | 7.813628     | 0.104981  | -1.534445 |
| H | 4.455509  | 6.277695  | 0.941243  | C                   | 4.463251     | 0.023449  | 2.084819  |
| N | 2.120728  | 0.422669  | -1.430554 | O                   | 3.695918     | 0.905669  | 1.614508  |
| H | 2.177210  | 1.887284  | 0.016446  | O                   | 4.669325     | -1.065048 | 1.443588  |
| H | -0.856279 | 2.311519  | -2.991288 | C                   | 5.161922     | 0.216759  | 3.398928  |
| C | 1.575980  | -0.009560 | -2.573240 | H                   | 5.017751     | -0.663310 | 4.032427  |
| H | 1.990687  | -0.910901 | -3.003062 | H                   | 6.237967     | 0.318422  | 3.223019  |
| H | -2.315709 | -4.014619 | 3.340232  | H                   | 4.791731     | 1.112519  | 3.900478  |
| H | -3.171570 | -5.450193 | -0.603983 | C                   | 1.334682     | -0.790931 | 3.566076  |
| O | -3.210056 | -1.498226 | 2.826160  | H                   | 0.582924     | -0.668514 | 4.352905  |
| O | -4.071045 | -3.043494 | -1.489538 | H                   | 2.012986     | -1.597274 | 3.859808  |
| C | -2.763170 | -1.699394 | 4.143079  | H                   | 1.921209     | 0.134571  | 3.511476  |
| H | -1.703164 | -1.989970 | 4.171305  |                     |              |           |           |
| H | -2.890585 | -0.742877 | 4.653725  | 107                 |              |           |           |
| H | -3.356418 | -2.465052 | 4.659419  | cis-T25_C5_IN5 Eopt | -2944.296462 |           |           |
| C | -4.177925 | -4.078323 | -2.434202 | Pd                  | -2.890487    | 0.430432  | 0.031426  |
| H | -4.587451 | -3.620638 | -3.336411 | C                   | -4.273674    | 2.238977  | -1.658302 |
| H | -3.198282 | -4.520563 | -2.662972 | C                   | -5.417228    | 0.231681  | -1.217771 |
| H | -4.858204 | -4.867096 | -2.089213 | C                   | -5.286337    | 2.670479  | -2.505004 |
| C | 2.100619  | 5.022133  | -1.149442 | C                   | -6.466718    | 0.606735  | -2.044114 |
| H | 1.833504  | 4.985955  | -2.203651 | H                   | -5.177826    | 3.633635  | -2.991500 |
| C | 0.505876  | 0.646059  | -3.163047 | H                   | -7.298140    | -0.078933 | -2.167212 |
| H | 0.078775  | 0.251300  | -4.078532 | N                   | -4.390305    | 1.064023  | -1.046248 |
| C | -0.544991 | -1.417238 | -0.230191 | H                   | -7.203231    | 2.160200  | -3.339322 |
| C | -0.490699 | -0.425861 | 1.872283  | C                   | -6.394899    | 1.843507  | -2.686266 |
| C | -1.234675 | -1.664369 | -1.437518 | N                   | -4.111861    | -1.190640 | 0.154767  |
| C | 0.686811  | -2.078654 | 0.028230  | N                   | -2.212106    | 2.374721  | -0.451239 |
| C | 0.706637  | -1.070632 | 2.234803  | C                   | -5.297931    | -1.088750 | -0.501873 |
| H | -0.987493 | 0.231028  | 2.576721  | C                   | -3.022433    | 3.003537  | -1.333293 |
|   |           |           |           | O                   | -6.200024    | -1.913367 | -0.562395 |

|   |           |           |           |                     |              |           |           |
|---|-----------|-----------|-----------|---------------------|--------------|-----------|-----------|
| O | -2.853670 | 4.118774  | -1.838797 | C                   | 0.765918     | -1.737415 | 0.713885  |
| C | -3.772510 | -2.380344 | 0.803789  | C                   | 0.361146     | -0.468430 | 2.734640  |
| C | -3.541163 | -2.385660 | 2.189141  | H                   | -1.555464    | 0.536185  | 2.716362  |
| C | -3.565972 | -3.566237 | 0.077977  | C                   | -0.214665    | -2.718888 | -1.717732 |
| C | -3.113070 | -3.545949 | 2.836501  | H                   | -2.004176    | -1.611487 | -1.305189 |
| C | -3.157493 | -4.734663 | 0.723958  | C                   | 1.619219     | -2.499424 | -0.144440 |
| C | -2.933314 | -4.708322 | 2.094871  | C                   | 1.190498     | -1.254796 | 1.967278  |
| H | -2.608736 | -5.614609 | 2.598151  | C                   | 1.107263     | -3.006354 | -1.318306 |
| C | -1.167022 | 3.246240  | 0.058724  | H                   | -0.600450    | -3.143563 | -2.639954 |
| C | 0.048319  | 3.411014  | -0.882620 | H                   | 2.190300     | -1.481434 | 2.323899  |
| H | -1.601897 | 4.256845  | 0.103842  | N                   | -1.278549    | -0.484829 | 0.971982  |
| C | -0.697755 | 2.893265  | 1.455615  | C                   | 4.048380     | -2.481862 | -0.821016 |
| C | 1.089848  | 4.325969  | -0.263841 | Pd                  | 3.848497     | -0.620168 | 0.182404  |
| H | -0.351265 | 3.917106  | -1.769536 | H                   | 3.782939     | -2.321303 | -1.862517 |
| H | -1.565662 | 2.656980  | 2.081421  | C                   | 5.397289     | -3.068776 | -0.600691 |
| H | -0.054445 | 2.008039  | 1.426478  | O                   | 5.753854     | -3.658779 | 0.394663  |
| C | 0.067859  | 4.068388  | 2.047114  | O                   | 6.173753     | -2.863379 | -1.672312 |
| C | 1.097406  | 4.635911  | 1.101711  | C                   | 7.523112     | -3.332495 | -1.550309 |
| H | -0.644838 | 4.863570  | 2.310964  | C                   | 8.250585     | -2.947109 | -2.815152 |
| H | 0.557321  | 3.773109  | 2.983993  | H                   | 7.507480     | -4.416540 | -1.394873 |
| C | 2.067446  | 5.517869  | 1.591608  | H                   | 7.972065     | -2.877907 | -0.661298 |
| C | 3.027510  | 5.754036  | -0.600241 | H                   | 9.290562     | -3.285222 | -2.764620 |
| C | 0.662173  | 2.118703  | -1.368417 | H                   | 7.781361     | -3.405401 | -3.691338 |
| C | 3.022193  | 6.080458  | 0.756115  | H                   | 8.246150     | -1.861012 | -2.948326 |
| H | 2.068097  | 5.759338  | 2.652753  | O                   | 5.048544     | 1.286634  | 0.299846  |
| H | 3.773816  | 6.178920  | -1.265446 | C                   | 4.402277     | 1.668560  | 1.311789  |
| C | 1.675629  | 1.454638  | -0.672913 | O                   | 3.455762     | 0.968029  | 1.790345  |
| C | 0.267431  | 1.576447  | -2.591404 | C                   | 4.727952     | 2.999523  | 1.933029  |
| H | 3.765758  | 6.762376  | 1.159682  | H                   | 5.811112     | 3.139522  | 1.971385  |
| N | 2.296865  | 0.361944  | -1.139924 | H                   | 4.308342     | 3.793280  | 1.306287  |
| H | 2.018699  | 1.805129  | 0.295202  | H                   | 4.297031     | 3.079929  | 2.932680  |
| H | -0.528713 | 2.055847  | -3.155176 | C                   | 3.056346     | -2.596289 | 0.173901  |
| C | 1.940581  | -0.106764 | -2.339581 | H                   | 3.357627     | -3.064477 | 1.110398  |
| H | 2.486542  | -0.968091 | -2.707239 | H                   | 1.742537     | -3.614785 | -1.956173 |
| H | -2.932405 | -3.555621 | 3.904820  | H                   | 4.885791     | -1.184951 | 1.139392  |
| H | -3.001197 | -5.652358 | 0.169420  | C                   | 0.804581     | 0.103249  | 4.046669  |
| O | -3.751451 | -1.200868 | 2.817732  | H                   | 1.046063     | -0.683902 | 4.769328  |
| O | -3.755179 | -3.464948 | -1.258865 | H                   | 1.709341     | 0.701934  | 3.888345  |
| C | -3.539858 | -1.156973 | 4.206603  | H                   | 0.033742     | 0.743529  | 4.486526  |
| H | -2.494915 | -1.381444 | 4.464591  | 99                  |              |           |           |
| H | -3.777679 | -0.137080 | 4.514944  | cis-T25_C5_TSI Eopt | -2806.635928 |           |           |
| H | -4.197698 | -1.855957 | 4.738837  | Pd                  | -2.537507    | 0.628350  | 0.273006  |
| C | -3.631215 | -4.635897 | -2.026244 | C                   | -3.802822    | 2.832943  | -0.992077 |
| H | -3.861952 | -4.347815 | -3.053307 | C                   | -5.083007    | 0.861878  | -0.930875 |
| H | -2.611135 | -5.042412 | -1.982187 | C                   | -4.790848    | 3.493550  | -1.710248 |
| H | -4.341293 | -5.406066 | -1.699978 | C                   | -6.111939    | 1.465692  | -1.639111 |
| C | 2.066742  | 4.884933  | -1.096139 | H                   | -4.617948    | 4.524597  | -1.998749 |
| H | 2.061462  | 4.629094  | -2.153541 | H                   | -6.992364    | 0.877255  | -1.873982 |
| C | 0.919042  | 0.456147  | -3.089070 | N                   | -3.995927    | 1.569550  | -0.623864 |
| H | 0.652355  | 0.027074  | -4.049386 | H                   | -6.748774    | 3.293567  | -2.580804 |
| C | -0.517135 | -1.354982 | 0.243575  | C                   | -5.958305    | 2.797888  | -2.024428 |
| C | -0.880293 | -0.115984 | 2.175067  | N                   | -3.875265    | -0.891799 | 0.108193  |
| C | -0.999875 | -1.867025 | -0.984630 | N                   | -1.721679    | 2.583951  | 0.157684  |

C -5.055815 -0.578138 -0.489271  
 C -2.492745 3.427741 -0.562054  
 O -6.017469 -1.308364 -0.686203  
 O -2.239767 4.601353 -0.858857  
 C -3.633023 -2.203798 0.524028  
 C -3.421070 -2.483717 1.883697  
 C -3.518647 -3.248766 -0.408962  
 C -3.099459 -3.774998 2.304554  
 C -3.214876 -4.545937 0.008670  
 C -3.006373 -4.791398 1.360097  
 H -2.763266 -5.798609 1.686043  
 C -0.582823 3.247770 0.771786  
 C 0.585039 3.546434 -0.203895  
 H -0.929687 4.242606 1.091389  
 C -0.072206 2.524076 2.000384  
 C 1.819530 4.059862 0.515060  
 H 0.210983 4.342452 -0.857851  
 H -0.924685 2.236638 2.626005  
 H 0.449198 1.608125 1.703092  
 C 0.877420 3.422457 2.776473  
 C 1.973203 3.978473 1.904119  
 H 0.306682 4.253807 3.216403  
 H 1.320191 2.877406 3.620178  
 C 3.162050 4.434170 2.484699  
 C 4.032531 5.046262 0.329450  
 C 0.927860 2.383293 -1.102043  
 C 4.186604 4.962404 1.712606  
 H 3.279348 4.362797 3.564302  
 H 4.829130 5.448828 -0.289146  
 C 1.882216 1.428822 -0.755007  
 C 0.311730 2.249322 -2.347207  
 H 5.105771 5.299856 2.183105  
 N 2.219222 0.411021 -1.559118  
 H 2.417010 1.488625 0.186833  
 H -0.440099 2.974998 -2.646624  
 C 1.658037 0.322537 -2.770963  
 H 1.993961 -0.495261 -3.396667  
 H -2.934997 -3.997327 3.352229  
 H -3.128606 -5.355728 -0.706040  
 O -3.542025 -1.421155 2.720984  
 O -3.688745 -2.888124 -1.703019  
 C -3.374267 -1.657236 4.096010  
 H -2.360596 -2.017203 4.325409  
 H -3.537214 -0.696863 4.588804  
 H -4.103802 -2.384673 4.474214  
 C -3.659531 -3.905049 -2.673737  
 H -3.858353 -3.414705 -3.628195  
 H -2.678004 -4.397368 -2.714202  
 H -4.434704 -4.658613 -2.487267  
 C 2.857347 4.598333 -0.254953  
 H 2.737649 4.649083 -1.335060  
 C 0.693501 1.221462 -3.198420  
 H 0.256358 1.112610 -4.185396

C -0.265064 -1.279935 0.057112  
 C -0.561943 -0.511550 2.224493  
 C -0.815537 -1.574259 -1.212169  
 C 1.037636 -1.740728 0.372887  
 C 0.675402 -1.035138 2.661201  
 H -1.205033 0.015723 2.920425  
 C -0.086989 -2.308086 -2.120015  
 H -1.831169 -1.260893 -1.432227  
 C 1.860618 -2.319297 -0.645128  
 H -0.538982 -2.578766 -3.070662  
 C 1.256831 -2.640441 -1.852430  
 H 1.847375 -3.126129 -2.627259  
 Pd 3.576094 -1.025442 -0.890309  
 H 2.849050 -3.174549 -0.205835  
 C 6.270433 -0.176157 -0.784457  
 O 7.292740 0.475866 -0.846795  
 O 5.085752 0.278288 -1.097372  
 N 5.020565 -2.240712 -0.257784  
 C 4.824866 -3.457247 0.181173  
 C 5.981184 -4.298556 0.649032  
 H 6.720758 -4.416963 -0.150073  
 H 5.613904 -5.278553 0.953481  
 H 6.489872 -3.821134 1.493704  
 O 3.661849 -3.989597 0.240160  
 C 6.337509 -1.635847 -0.317505  
 H 6.993898 -2.172666 -1.015608  
 C 1.492408 -1.588112 1.702154  
 H 2.486970 -1.948200 1.954731  
 N -0.987855 -0.569682 0.979737  
 H 6.832569 -1.644366 0.662068  
 C 1.066640 -0.904353 4.102095  
 H 0.396942 -1.482677 4.749921  
 H 2.085749 -1.263889 4.266824  
 H 1.018006 0.140205 4.432334  
 107  
 cis-T25\_C5\_TSII Eopt -2944.272220  
 Pd -2.822411 0.669287 0.302447  
 C -3.871311 3.007642 -0.918575  
 C -5.330553 1.163808 -0.896065  
 C -4.790460 3.769577 -1.628119  
 C -6.294259 1.872208 -1.598894  
 H -4.521873 4.785794 -1.895166  
 H -7.223636 1.371820 -1.848796  
 N -4.184360 1.762446 -0.571614  
 H -6.752904 3.767228 -2.511186  
 C -6.015244 3.190810 -1.960047  
 N -4.295388 -0.712605 0.113033  
 N -1.819340 2.544845 0.219924  
 C -5.438692 -0.281047 -0.482385  
 C -2.518997 3.476102 -0.462641  
 O -6.461861 -0.916412 -0.698258  
 O -2.179493 4.642297 -0.699057  
 C -4.169038 -2.050071 0.497158

|   |           |           |           |                      |              |           |           |
|---|-----------|-----------|-----------|----------------------|--------------|-----------|-----------|
| C | -3.992428 | -2.380820 | 1.850162  | H                    | -1.556267    | -0.278364 | 2.927885  |
| C | -4.132082 | -3.076347 | -0.462165 | C                    | -0.523605    | -2.107112 | -2.324075 |
| C | -3.788944 | -3.705565 | 2.240164  | H                    | -2.289485    | -1.218562 | -1.484110 |
| C | -3.943352 | -4.405053 | -0.076393 | C                    | 1.453540     | -2.145508 | -0.932013 |
| C | -3.773560 | -4.701990 | 1.270314  | H                    | -0.989405    | -2.305669 | -3.285668 |
| H | -3.623706 | -5.734685 | 1.572225  | C                    | 0.843045     | -2.406891 | -2.138404 |
| C | -0.658412 | 3.100897  | 0.899244  | H                    | 1.432992     | -2.762390 | -2.980456 |
| C | 0.532755  | 3.453079  | -0.027221 | C                    | 1.164317     | -1.663585 | 1.504708  |
| H | -0.968243 | 4.072979  | 1.315526  | H                    | 2.189843     | -1.968913 | 1.710243  |
| C | -0.190055 | 2.235960  | 2.049885  | N                    | -1.369051    | -0.686156 | 0.940020  |
| C | 1.755200  | 3.888157  | 0.761921  | Pd                   | 3.315405     | -1.297606 | -0.993264 |
| H | 0.185901  | 4.305780  | -0.620830 | C                    | 3.094991     | -3.516255 | -0.508244 |
| H | -1.059352 | 1.921517  | 2.637331  | C                    | 4.401143     | -2.991486 | -0.418916 |
| H | 0.291872  | 1.333456  | 1.661104  | H                    | 2.580523     | -3.771813 | 0.412980  |
| C | 0.784535  | 3.005602  | 2.927105  | H                    | 2.832056     | -4.107427 | -1.378222 |
| C | 1.893984  | 3.646456  | 2.133661  | H                    | 5.117387     | -3.140808 | -1.222183 |
| H | 0.235726  | 3.789026  | 3.470753  | C                    | 4.938193     | -2.614941 | 0.909407  |
| H | 1.213300  | 2.347183  | 3.693736  | O                    | 4.276575     | -2.561010 | 1.932980  |
| C | 3.077227  | 4.028903  | 2.775897  | O                    | 6.234747     | -2.325123 | 0.836568  |
| C | 3.967242  | 4.893858  | 0.717589  | C                    | 6.814337     | -1.709837 | 1.997664  |
| C | 0.908113  | 2.371009  | -1.012371 | C                    | 6.435147     | -0.245319 | 2.071939  |
| C | 4.108682  | 4.645571  | 2.082555  | H                    | 7.889493     | -1.842715 | 1.859564  |
| H | 3.182686  | 3.832229  | 3.841094  | H                    | 6.493748     | -2.257752 | 2.888487  |
| H | 4.765562  | 5.376521  | 0.160882  | H                    | 7.006812     | 0.249308  | 2.864766  |
| C | 1.811522  | 1.355551  | -0.696972 | H                    | 6.635909     | 0.247157  | 1.116765  |
| C | 0.406454  | 2.392784  | -2.314010 | H                    | 5.369921     | -0.134677 | 2.291668  |
| H | 5.020575  | 4.929453  | 2.600638  | C                    | 5.398990     | -0.122873 | -2.357248 |
| N | 2.213559  | 0.438318  | -1.582947 | O                    | 4.790327     | -0.667700 | -3.282425 |
| H | 2.247312  | 1.283177  | 0.294271  | O                    | 5.062020     | -0.192300 | -1.109892 |
| H | -0.311647 | 3.160983  | -2.590518 | C                    | 6.642489     | 0.707810  | -2.605871 |
| C | 1.777810  | 0.507436  | -2.846835 | H                    | 7.485350     | 0.289056  | -2.046382 |
| H | 2.196091  | -0.221565 | -3.531250 | H                    | 6.879751     | 0.729524  | -3.670756 |
| H | -3.655202 | -3.967318 | 3.283139  | H                    | 6.484728     | 1.727442  | -2.239470 |
| H | -3.920035 | -5.200831 | -0.811453 | C                    | 0.784523     | -1.244131 | 3.965322  |
| O | -4.023509 | -1.332387 | 2.713246  | H                    | 0.191376     | -1.945075 | 4.565297  |
| O | -4.259174 | -2.668653 | -1.746867 | H                    | 1.835286     | -1.534059 | 4.049810  |
| C | -3.900215 | -1.617101 | 4.083970  | H                    | 0.665806     | -0.250375 | 4.413671  |
| H | -2.927077 | -2.072538 | 4.318851  | 107                  |              |           |           |
| H | -3.984041 | -0.658414 | 4.599314  | cis-T25_C5_TSIIIeopt | -2944.274561 |           |           |
| H | -4.698673 | -2.284711 | 4.432217  | Pd                   | -2.985325    | 0.246380  | 0.092986  |
| C | -4.243486 | -3.653382 | -2.750091 | C                    | -4.384818    | 2.131200  | -1.505214 |
| H | -4.376768 | -3.122124 | -3.693995 | C                    | -5.281779    | -0.041628 | -1.526332 |
| H | -3.287744 | -4.195192 | -2.768040 | C                    | -5.352791    | 2.576733  | -2.395886 |
| H | -5.064223 | -4.370215 | -2.621871 | C                    | -6.275838    | 0.338527  | -2.416077 |
| C | 2.799862  | 4.514654  | 0.071778  | H                    | -5.330879    | 3.616098  | -2.704696 |
| H | 2.688368  | 4.693461  | -0.995609 | H                    | -6.988146    | -0.410186 | -2.745631 |
| C | 0.859523  | 1.466682  | -3.245851 | N                    | -4.396855    | 0.862895  | -1.107104 |
| H | 0.515695  | 1.487991  | -4.274809 | H                    | -7.075602    | 1.988686  | -3.543486 |
| C | -0.663040 | -1.299544 | -0.061670 | C                    | -6.306756    | 1.665084  | -2.847619 |
| C | -0.918227 | -0.731859 | 2.176572  | N                    | -4.005901    | -1.490553 | -0.153995 |
| C | -1.252752 | -1.498475 | -1.330680 | N                    | -2.462412    | 2.302700  | -0.086632 |
| C | 0.670155  | -1.726476 | 0.181218  | C                    | -5.081528    | -1.431996 | -0.982946 |
| C | 0.345517  | -1.250532 | 2.532006  | C                    | -3.290330    | 2.974294  | -0.917779 |

O -5.840437 -2.339042 -1.296039  
O -3.238685 4.173385 -1.216107  
C -3.614225 -2.717984 0.388028  
C -3.662034 -2.923845 1.775760  
C -3.094184 -3.734380 -0.431624  
C -3.196196 -4.114193 2.336781  
C -2.641227 -4.933238 0.122619  
C -2.696154 -5.106032 1.500064  
H -2.339785 -6.036214 1.933346  
C -1.521830 3.182631 0.591584  
C -0.394891 3.742273 -0.316432  
H -2.084359 4.077801 0.901068  
C -0.912744 2.561525 1.831159  
C 0.534676 4.643804 0.469692  
H -0.906289 4.347718 -1.072753  
H -1.706001 2.096291 2.423126  
H -0.207053 1.771629 1.545400  
C -0.214931 3.625406 2.668483  
C 0.658399 4.553302 1.861220  
H -0.979149 4.229031 3.180209  
H 0.379893 3.155254 3.462557  
C 1.586434 5.371607 2.515307  
C 2.247800 6.365529 0.428181  
C 0.377223 2.670620 -1.048446  
C 2.378133 6.269449 1.813266  
H 1.683167 5.296173 3.596722  
H 2.858508 7.066306 -0.134022  
C 1.597054 2.183051 -0.580117  
C -0.104002 2.139592 -2.247204  
H 3.094812 6.892218 2.341494  
N 2.309693 1.247137 -1.221837  
H 2.031418 2.567096 0.336515  
H -1.044431 2.502848 -2.651618  
C 1.840815 0.750123 -2.376774  
H 2.441803 -0.023402 -2.844631  
H -3.231038 -4.280093 3.407022  
H -2.240531 -5.720870 -0.504299  
O -4.172056 -1.893045 2.498690  
O -3.043792 -3.440506 -1.751713  
C -4.279410 -2.068322 3.888666  
H -3.294533 -2.210719 4.357325  
H -4.734370 -1.153855 4.274025  
H -4.919511 -2.923263 4.141171  
C -2.575457 -4.438174 -2.626165  
H -2.642944 -4.013660 -3.629103  
H -1.531189 -4.704255 -2.412765  
H -3.197348 -5.340433 -2.573583  
C 1.333265 5.555712 -0.229452  
H 1.232754 5.616287 -1.311015  
C 0.635560 1.174904 -2.917401  
H 0.289381 0.748713 -3.853401  
C -0.438803 -1.219153 0.613688  
C -1.430180 -0.400031 2.550256

C -0.589318 -1.647851 -0.723411  
C 0.789611 -1.427195 1.298086  
C -0.291134 -0.668742 3.335712  
H -2.316951 0.035596 2.998357  
C 0.462369 -2.267272 -1.350697  
H -1.547043 -1.517419 -1.216382  
C 1.920254 -1.884152 0.547737  
C 0.829421 -1.121521 2.676606  
C 1.728259 -2.347359 -0.738681  
H 0.346906 -2.630516 -2.367419  
H 1.741816 -1.281458 3.243593  
N -1.481752 -0.604543 1.250848  
C 4.496916 -1.855052 0.375509  
Pd 3.837322 -0.009003 -0.387733  
H 4.525703 -2.463229 -0.524155  
C 5.746994 -1.722748 1.151921  
H 3.165202 0.054654 1.062328  
O 5.818035 -1.326815 2.299013  
O 6.805349 -2.081713 0.416388  
C 8.081388 -1.899246 1.039525  
C 9.133343 -2.258053 0.018198  
H 8.136038 -2.534307 1.930491  
H 8.166460 -0.858961 1.370482  
H 10.131945 -2.131864 0.448834  
H 9.024702 -3.298025 -0.304761  
H 9.051106 -1.612936 -0.862009  
O 4.987425 0.027406 -2.102706  
C 4.871260 -0.970340 -2.907400  
O 4.030419 -1.875835 -2.820239  
C 5.896355 -0.978504 -4.025526  
H 6.859720 -1.304022 -3.616551  
H 5.595552 -1.669960 -4.814746  
H 6.036296 0.027868 -4.428899  
C 3.278745 -1.570020 1.061802  
H 3.405512 -1.436912 2.135427  
H 2.577541 -2.644221 -1.346704  
C -0.320889 -0.396703 4.809388  
H -1.043729 -1.045277 5.318582  
H 0.659310 -0.567448 5.262584  
H -0.612985 0.639967 5.014755  
99  
cis-T25\_C6\_IN2 Eopt -2806.648643  
Pd -2.668472 0.567341 -0.075291  
C -3.232448 2.703079 -1.858251  
C -4.568233 0.787835 -2.148097  
C -3.864837 3.345060 -2.915088  
C -5.237244 1.371572 -3.213803  
H -3.546818 4.348785 -3.175030  
H -6.007134 0.797851 -3.718498  
N -3.616617 1.476506 -1.517623  
H -5.390004 3.147753 -4.420148  
C -4.879571 2.666889 -3.590473  
N -3.967918 -0.889530 -0.588886

|   |           |           |           |                     |              |           |           |
|---|-----------|-----------|-----------|---------------------|--------------|-----------|-----------|
| N | -1.653206 | 2.441106  | -0.081547 | H                   | 1.470238     | 1.942245  | -4.136277 |
| C | -4.784362 | -0.615350 | -1.637983 | C                   | -0.449886    | -1.074248 | 0.920271  |
| C | -2.122732 | 3.280250  | -1.025392 | C                   | -1.963215    | -0.595903 | 2.613810  |
| O | -5.607125 | -1.351858 | -2.164771 | C                   | -0.196246    | -1.250732 | -0.457891 |
| O | -1.746442 | 4.438340  | -1.257020 | C                   | 0.569891     | -1.353896 | 1.867115  |
| C | -3.915941 | -2.177334 | -0.048352 | C                   | -1.067461    | -1.009365 | 3.624348  |
| C | -4.446931 | -2.433735 | 1.224361  | H                   | -2.950388    | -0.219332 | 2.865507  |
| C | -3.229182 | -3.201736 | -0.719798 | H                   | -1.021940    | -1.164564 | -1.158907 |
| C | -4.309441 | -3.693025 | 1.812404  | C                   | 1.896890     | -1.534168 | 1.391344  |
| C | -3.089894 | -4.463914 | -0.138694 | C                   | 0.215814     | -1.326915 | 3.234334  |
| C | -3.635259 | -4.692449 | 1.119213  | H                   | 0.973357     | -1.557574 | 3.980882  |
| H | -3.530429 | -5.674174 | 1.572409  | N                   | -1.655045    | -0.589213 | 1.332138  |
| C | -0.709888 | 3.062228  | 0.837922  | H                   | 2.696790     | -1.603236 | 2.127144  |
| C | 0.643832  | 3.491603  | 0.201231  | Pd                  | 3.936352     | -0.881646 | -0.735223 |
| H | -1.157988 | 4.013188  | 1.170234  | C                   | 6.709986     | -0.714626 | -1.400297 |
| C | -0.482074 | 2.211137  | 2.070444  | O                   | 7.812338     | -0.398964 | -1.808862 |
| C | 1.677386  | 3.887514  | 1.242771  | O                   | 5.606513     | -0.064217 | -1.588454 |
| H | 0.398766  | 4.383525  | -0.384153 | N                   | 5.219819     | -2.396851 | -0.317497 |
| H | -1.452561 | 1.888132  | 2.457299  | C                   | 4.937299     | -3.604146 | 0.026878  |
| H | 0.085424  | 1.312349  | 1.804592  | C                   | 5.954100     | -4.680273 | 0.237960  |
| C | 0.261984  | 2.995232  | 3.137016  | H                   | 6.748879     | -4.338014 | 0.907149  |
| C | 1.518697  | 3.634115  | 2.609701  | H                   | 6.421004     | -4.953180 | -0.714975 |
| H | -0.399535 | 3.780204  | 3.533740  | H                   | 5.471684     | -5.561973 | 0.660832  |
| H | 0.504523  | 2.343143  | 3.985661  | O                   | 3.694650     | -3.998188 | 0.220192  |
| C | 2.537847  | 4.004170  | 3.494869  | C                   | 6.602750     | -1.996147 | -0.552783 |
| C | 3.852789  | 4.880423  | 1.684719  | C                   | 2.182305     | -1.528643 | 0.038821  |
| C | 1.242456  | 2.515690  | -0.788864 | H                   | 7.169758     | -2.782113 | -1.061805 |
| C | 3.696956  | 4.620007  | 3.045906  | C                   | 1.080639     | -1.520075 | -0.869857 |
| H | 2.409733  | 3.798359  | 4.555893  | H                   | 1.272600     | -1.637042 | -1.933496 |
| H | 4.754289  | 5.361085  | 1.315786  | H                   | 7.100537     | -1.796300 | 0.405608  |
| C | 2.153659  | 1.530808  | -0.411520 | H                   | 3.100622     | -3.211315 | 0.085841  |
| C | 0.966486  | 2.638535  | -2.152248 | C                   | -1.517063    | -1.024434 | 5.054509  |
| H | 4.477728  | 4.893763  | 3.750156  | H                   | -2.230725    | -1.838384 | 5.231790  |
| N | 2.784607  | 0.745967  | -1.295492 | H                   | -0.672302    | -1.168781 | 5.733710  |
| H | 2.399731  | 1.366217  | 0.631613  | H                   | -2.016174    | -0.087729 | 5.327236  |
| H | 0.247788  | 3.386783  | -2.477836 | 107                 |              |           |           |
| C | 2.562308  | 0.915405  | -2.605967 | cis-T25_C6_IN3 Eopt | -2944.281548 |           |           |
| H | 3.143982  | 0.289998  | -3.274143 | Pd                  | 2.807461     | -0.595231 | 0.029610  |
| H | -4.723336 | -3.902081 | 2.791909  | C                   | 3.482617     | -3.016856 | -1.290148 |
| H | -2.563479 | -5.260270 | -0.651379 | C                   | 4.718155     | -1.135148 | -1.973416 |
| O | -5.058497 | -1.378132 | 1.821565  | C                   | 4.150744     | -3.827179 | -2.199017 |
| O | -2.711627 | -2.854061 | -1.922103 | C                   | 5.419612     | -1.888162 | -2.903429 |
| C | -5.662109 | -1.601753 | 3.071325  | H                   | 3.885451     | -4.877649 | -2.246802 |
| H | -4.923326 | -1.885612 | 3.835294  | H                   | 6.159834     | -1.390051 | -3.520311 |
| H | -6.127585 | -0.656148 | 3.354640  | N                   | 3.801059     | -1.728580 | -1.209110 |
| H | -6.432258 | -2.381527 | 3.014688  | H                   | 5.667816     | -3.862394 | -3.724701 |
| C | -1.959134 | -3.821928 | -2.612858 | C                   | 5.130862     | -3.249661 | -3.006111 |
| H | -1.633390 | -3.343811 | -3.538178 | N                   | 4.031964     | 0.791363  | -0.779925 |
| H | -1.078955 | -4.133027 | -2.034019 | N                   | 1.880869     | -2.482706 | 0.404499  |
| H | -2.564751 | -4.703461 | -2.858059 | C                   | 4.859898     | 0.351346  | -1.761851 |
| C | 2.849053  | 4.515329  | 0.800160  | C                   | 2.399518     | -3.469427 | -0.352292 |
| H | 2.971659  | 4.707647  | -0.263564 | O                   | 5.641241     | 1.006947  | -2.437600 |
| C | 1.640285  | 1.840817  | -3.069472 | O                   | 2.082740     | -4.667861 | -0.347043 |



|   |           |           |           |                     |              |           |           |
|---|-----------|-----------|-----------|---------------------|--------------|-----------|-----------|
| C | 3.905138  | 2.159505  | -0.524268 | C                   | 1.097028     | 1.544210  | 3.373155  |
| C | 4.397691  | 2.706377  | 0.669795  | H                   | 3.033524     | 0.747352  | 2.771160  |
| C | 3.185119  | 2.982957  | -1.405073 | H                   | 1.106653     | 0.856230  | -1.366192 |
| C | 4.189989  | 4.053419  | 0.974544  | C                   | -1.865377    | 1.463521  | 1.082387  |
| C | 2.977004  | 4.331625  | -1.108473 | C                   | -0.198980    | 1.700355  | 2.931619  |
| C | 3.485730  | 4.848778  | 0.077174  | H                   | -0.981987    | 2.001813  | 3.625029  |
| H | 3.328164  | 5.898369  | 0.309167  | N                   | 1.740498     | 0.767031  | 1.192173  |
| C | 0.953345  | -2.955051 | 1.423792  | H                   | -2.679284    | 1.585351  | 1.794799  |
| C | -0.371713 | -3.563405 | 0.878981  | C                   | -2.110534    | 1.221560  | -0.249980 |
| H | 1.438791  | -3.800676 | 1.938357  | C                   | -1.016659    | 1.123581  | -1.150475 |
| C | 0.667036  | -1.889889 | 2.461613  | H                   | -1.207690    | 1.032297  | -2.216882 |
| C | -1.383722 | -3.822318 | 1.981852  | Pd                  | -3.838249    | 0.498625  | -0.906180 |
| H | -0.075555 | -4.531531 | 0.462234  | C                   | -4.491443    | 2.364548  | -1.801635 |
| H | 1.614487  | -1.447734 | 2.781178  | C                   | -5.047418    | 2.275285  | -0.538275 |
| H | 0.060531  | -1.092791 | 2.017970  | H                   | -3.631951    | 3.007494  | -1.965333 |
| C | -0.052421 | -2.481420 | 3.661117  | H                   | -4.990533    | 1.958326  | -2.676718 |
| C | -1.258241 | -3.293900 | 3.271325  | H                   | -6.010061    | 1.795512  | -0.381780 |
| H | 0.645406  | -3.125394 | 4.217475  | C                   | -4.541502    | 3.057052  | 0.622433  |
| H | -0.349656 | -1.684088 | 4.354138  | O                   | -4.886691    | 2.853083  | 1.766596  |
| C | -2.259454 | -3.552377 | 4.214816  | O                   | -3.667389    | 4.000920  | 0.254002  |
| C | -3.488168 | -4.861603 | 2.618098  | C                   | -3.059419    | 4.753998  | 1.312279  |
| C | -1.016516 | -2.813874 | -0.267453 | C                   | -3.934853    | 5.915940  | 1.728096  |
| C | -3.367350 | -4.325411 | 3.899916  | H                   | -2.107671    | 5.089205  | 0.893894  |
| H | -2.158598 | -3.132126 | 5.213641  | H                   | -2.863777    | 4.085175  | 2.154590  |
| H | -4.348224 | -5.471127 | 2.355582  | H                   | -3.418922    | 6.521610  | 2.480935  |
| C | -2.012581 | -1.857346 | -0.078442 | H                   | -4.163977    | 6.555492  | 0.870023  |
| C | -0.685538 | -3.134652 | -1.586577 | H                   | -4.870961    | 5.552712  | 2.160623  |
| H | -4.135042 | -4.508701 | 4.646605  | C                   | -5.702087    | -0.612536 | -2.781376 |
| N | -2.672124 | -1.281579 | -1.094089 | O                   | -4.855603    | -0.230729 | -3.603689 |
| H | -2.302314 | -1.547206 | 0.920004  | O                   | -5.629392    | -0.425982 | -1.509472 |
| H | 0.093287  | -3.871471 | -1.768157 | C                   | -6.928999    | -1.378115 | -3.235762 |
| C | -2.386061 | -1.634386 | -2.357423 | H                   | -7.058095    | -1.285931 | -4.315745 |
| H | -2.995269 | -1.164700 | -3.126422 | H                   | -6.801441    | -2.436567 | -2.981639 |
| H | 4.573810  | 4.485847  | 1.891110  | H                   | -7.821192    | -1.024596 | -2.711673 |
| H | 2.426369  | 4.973950  | -1.785560 | C                   | 1.523752     | 1.835865  | 4.780532  |
| O | 5.047557  | 1.834186  | 1.483052  | H                   | 2.183500     | 2.711475  | 4.817486  |
| O | 2.706351  | 2.362178  | -2.509496 | H                   | 0.661521     | 2.041521  | 5.420922  |
| C | 5.606443  | 2.346387  | 2.666755  | H                   | 2.075413     | 0.993941  | 5.213958  |
| H | 4.834783  | 2.745301  | 3.341569  |                     |              |           |           |
| H | 6.109015  | 1.507004  | 3.150550  | 107                 |              |           |           |
| H | 6.339943  | 3.135969  | 2.459331  | cis-T25_C6_IN4 Eopt | -2944.331016 |           |           |
| C | 1.926723  | 3.123119  | -3.400130 | Pd                  | -2.832890    | 0.608850  | -0.075719 |
| H | 1.639151  | 2.442695  | -4.203304 | C                   | -3.731372    | 2.530582  | -1.959547 |
| H | 1.023204  | 3.511029  | -2.910344 | C                   | -4.886293    | 0.482065  | -2.011296 |
| H | 2.499009  | 3.958011  | -3.823695 | C                   | -4.507897    | 3.034594  | -2.994511 |
| C | -2.502723 | -4.607824 | 1.675929  | C                   | -5.696079    | 0.924336  | -3.047571 |
| H | -2.597062 | -5.015884 | 0.671773  | H                   | -4.312165    | 4.042069  | -3.345076 |
| C | -1.380485 | -2.548800 | -2.636511 | H                   | -6.445338    | 0.247237  | -3.443444 |
| H | -1.162461 | -2.804555 | -3.668385 | N                   | -3.957229    | 1.298124  | -1.514526 |
| C | 0.514526  | 1.098896  | 0.696666  | H                   | -6.124121    | 2.588578  | -4.343650 |
| C | 2.030507  | 1.016535  | 2.453335  | C                   | -5.501673    | 2.217531  | -3.534286 |
| C | 0.269618  | 1.014210  | -0.691641 | N                   | -4.017844    | -1.009489 | -0.389202 |
| C | -0.535154 | 1.464391  | 1.579569  | N                   | -2.002514    | 2.536499  | -0.307615 |
|   |           |           |           | C                   | -4.928220    | -0.890731 | -1.389701 |

|   |           |           |           |                     |              |           |           |
|---|-----------|-----------|-----------|---------------------|--------------|-----------|-----------|
| C | -2.604039 | 3.254762  | -1.279754 | C                   | -1.962954    | -0.071986 | 2.685186  |
| O | -5.715137 | -1.734386 | -1.798086 | C                   | -0.483877    | -1.482306 | -0.291122 |
| O | -2.315048 | 4.397515  | -1.656437 | C                   | 0.201554     | -1.634452 | 2.051950  |
| C | -3.811400 | -2.248881 | 0.223135  | C                   | -1.167304    | -0.564703 | 3.741570  |
| C | -4.136484 | -2.431167 | 1.575986  | H                   | -2.819602    | 0.561114  | 2.893709  |
| C | -3.182029 | -3.295463 | -0.471606 | C                   | 0.583151     | -2.268137 | -0.634336 |
| C | -3.833259 | -3.628508 | 2.227184  | H                   | -1.199386    | -1.144595 | -1.034590 |
| C | -2.886738 | -4.499316 | 0.171001  | C                   | 1.326128     | -2.391365 | 1.646885  |
| C | -3.214044 | -4.648292 | 1.513141  | C                   | -0.071395    | -1.324576 | 3.401584  |
| H | -2.980637 | -5.582479 | 2.015984  | C                   | 1.545639     | -2.685467 | 0.321132  |
| C | -0.951548 | 3.263106  | 0.384660  | H                   | 0.726829     | -2.539483 | -1.677084 |
| C | 0.302498  | 3.517519  | -0.491610 | H                   | 0.597353     | -1.699339 | 4.173655  |
| H | -1.338397 | 4.270042  | 0.607894  | N                   | -1.715668    | -0.308051 | 1.411774  |
| C | -0.547843 | 2.613227  | 1.692996  | H                   | 2.048840     | -2.702166 | 2.397436  |
| C | 1.412334  | 4.184317  | 0.296248  | Pd                  | 3.709167     | -0.565001 | -0.088716 |
| H | -0.030333 | 4.208473  | -1.273641 | C                   | 2.825612     | -3.317615 | -0.148840 |
| H | -1.448569 | 2.374194  | 2.265725  | C                   | 3.569432     | -2.349580 | -1.059401 |
| H | -0.026105 | 1.668241  | 1.497962  | H                   | 2.622011     | -4.257361 | -0.686524 |
| C | 0.337812  | 3.550308  | 2.501543  | H                   | 3.040734     | -2.183775 | -2.000831 |
| C | 1.455183  | 4.160730  | 1.694504  | C                   | 4.968783     | -2.770261 | -1.342583 |
| H | -0.282749 | 4.362366  | 2.909382  | O                   | 5.598476     | -3.603524 | -0.727958 |
| H | 0.755574  | 3.021875  | 3.367621  | O                   | 5.478535     | -2.087737 | -2.391729 |
| C | 2.544746  | 4.744835  | 2.349639  | C                   | 6.854118     | -2.348666 | -2.675553 |
| C | 3.526447  | 5.379008  | 0.248725  | C                   | 7.260379     | -1.439514 | -3.810902 |
| C | 0.810565  | 2.281066  | -1.194539 | H                   | 6.974479     | -3.406924 | -2.933355 |
| C | 3.574469  | 5.347474  | 1.641972  | H                   | 7.444541     | -2.164125 | -1.771715 |
| H | 2.579708  | 4.716667  | 3.436859  | H                   | 8.313295     | -1.600723 | -4.064528 |
| H | 4.324678  | 5.849398  | -0.318486 | H                   | 6.657087     | -1.635658 | -4.703120 |
| C | 1.813860  | 1.484639  | -0.645535 | H                   | 7.128445     | -0.389744 | -3.530399 |
| C | 0.329324  | 1.922593  | -2.454902 | C                   | 4.962264     | -0.033848 | 2.000417  |
| H | 4.414262  | 5.788322  | 2.171874  | O                   | 4.996950     | -1.173524 | 1.418349  |
| N | 2.338392  | 0.421456  | -1.276824 | O                   | 4.257952     | 0.898485  | 1.528053  |
| H | 2.250178  | 1.719082  | 0.321680  | C                   | 5.800098     | 0.172030  | 3.227832  |
| H | -0.446870 | 2.524140  | -2.920203 | H                   | 5.856228     | -0.750246 | 3.810894  |
| C | 1.899782  | 0.116197  | -2.504005 | H                   | 6.817945     | 0.437914  | 2.921169  |
| H | 2.385546  | -0.713183 | -3.003254 | H                   | 5.395107     | 0.988499  | 3.829082  |
| H | -4.080771 | -3.776223 | 3.271688  | H                   | 3.468597     | -3.570248 | 0.699084  |
| H | -2.398833 | -5.309407 | -0.357746 | C                   | -1.508140    | -0.208477 | 5.158187  |
| O | -4.732179 | -1.369688 | 2.177672  | H                   | -2.519380    | -0.538518 | 5.422653  |
| O | -2.869853 | -3.025626 | -1.761137 | H                   | -0.809249    | -0.672491 | 5.859375  |
| C | -5.118426 | -1.521388 | 3.519789  | H                   | -1.470401    | 0.876339  | 5.313527  |
| H | -4.253426 | -1.708409 | 4.172227  | 107                 |              |           |           |
| H | -5.591085 | -0.580077 | 3.806483  | cis-T25_C6_IN5 Eopt | -2944.300487 |           |           |
| H | -5.839371 | -2.339749 | 3.643694  | Pd                  | 2.831024     | 0.498374  | 0.439489  |
| C | -2.249843 | -4.043865 | -2.506416 | C                   | 3.238264     | 2.442045  | 2.454780  |
| H | -2.100376 | -3.635070 | -3.507272 | C                   | 4.757749     | 0.643461  | 2.496014  |
| H | -1.277703 | -4.321832 | -2.076601 | C                   | 3.828668     | 3.010921  | 3.575682  |
| H | -2.884446 | -4.936584 | -2.573314 | C                   | 5.396244     | 1.162546  | 3.613002  |
| C | 2.452189  | 4.799653  | -0.409990 | H                   | 3.430858     | 3.946772  | 3.952591  |
| H | 2.411791  | 4.810481  | -1.497311 | H                   | 6.244203     | 0.624412  | 4.022764  |
| C | 0.886677  | 0.836390  | -3.118406 | N                   | 3.722452     | 1.300884  | 1.974380  |
| H | 0.558330  | 0.556273  | -4.114110 | H                   | 5.398647     | 2.783107  | 5.029252  |
| C | -0.681268 | -1.127039 | 1.060403  | C                   | 4.916966     | 2.356661  | 4.153881  |

|   |           |           |           |                     |              |           |           |
|---|-----------|-----------|-----------|---------------------|--------------|-----------|-----------|
| N | 4.258239  | -0.907078 | 0.775804  | C                   | -1.912138    | 1.072054  | 2.987103  |
| N | 1.705669  | 2.277366  | 0.620591  | H                   | -1.824994    | 0.913963  | 4.057421  |
| C | 5.138616  | -0.623605 | 1.770426  | C                   | 0.768186     | -1.170601 | -0.924212 |
| C | 2.107155  | 3.037837  | 1.661439  | C                   | 2.589240     | -0.664089 | -2.271234 |
| O | 6.127343  | -1.261004 | 2.106685  | C                   | 0.177244     | -1.187123 | 0.358018  |
| O | 1.678781  | 4.151303  | 1.991791  | C                   | 0.105805     | -1.800506 | -2.011013 |
| C | 4.509623  | -1.952613 | -0.115603 | C                   | 2.050639     | -1.345404 | -3.384653 |
| C | 5.527332  | -1.839874 | -1.078520 | H                   | 3.560927     | -0.183150 | -2.339625 |
| C | 3.654614  | -3.066876 | -0.157967 | C                   | -1.059930    | -1.738312 | 0.528743  |
| C | 5.704226  | -2.829912 | -2.049762 | H                   | 0.732386     | -0.769924 | 1.192128  |
| C | 3.813353  | -4.048432 | -1.139869 | C                   | -1.201603    | -2.298396 | -1.811624 |
| C | 4.841304  | -3.920792 | -2.067255 | C                   | 0.789351     | -1.877389 | -3.246410 |
| H | 4.975767  | -4.692593 | -2.820154 | C                   | -1.812745    | -2.229077 | -0.573422 |
| C | 0.816229  | 2.960366  | -0.310613 | H                   | -1.489648    | -1.764601 | 1.522494  |
| C | -0.566887 | 3.352414  | 0.272350  | H                   | 0.308920     | -2.375483 | -4.085818 |
| H | 1.284781  | 3.928154  | -0.556755 | N                   | 1.972476     | -0.563466 | -1.109872 |
| C | 0.625458  | 2.192985  | -1.605815 | H                   | -1.745818    | -2.703351 | -2.661414 |
| C | -1.434670 | 4.016355  | -0.778333 | Pd                  | -4.339592    | -0.771572 | -0.295118 |
| H | -0.346647 | 4.095399  | 1.044678  | C                   | -3.227060    | -2.587538 | -0.441070 |
| H | 1.595804  | 1.842356  | -1.968425 | C                   | -3.974337    | -2.564031 | 0.757655  |
| H | 0.007466  | 1.305863  | -1.422109 | H                   | -3.647769    | -3.173829 | -1.255459 |
| C | -0.021574 | 3.079436  | -2.660854 | H                   | -3.514952    | -2.312206 | 1.709084  |
| C | -1.203189 | 3.863215  | -2.149340 | C                   | -5.213153    | -3.373979 | 0.862729  |
| H | 0.729359  | 3.791008  | -3.035768 | O                   | -5.678909    | -4.073108 | -0.009444 |
| H | -0.325222 | 2.476123  | -3.525430 | O                   | -5.760487    | -3.225793 | 2.078685  |
| C | -2.064520 | 4.488620  | -3.057847 | C                   | -7.008185    | -3.902739 | 2.274302  |
| C | -3.355307 | 5.424512  | -1.257832 | C                   | -7.500377    | -3.549733 | 3.656816  |
| C | -1.308467 | 2.232193  | 0.963192  | H                   | -6.849515    | -4.979823 | 2.154020  |
| C | -3.130308 | 5.264394  | -2.625620 | H                   | -7.706579    | -3.583040 | 1.494238  |
| H | -1.886358 | 4.360392  | -4.123600 | H                   | -8.456623    | -4.046195 | 3.850668  |
| H | -4.183452 | 6.032473  | -0.903995 | H                   | -6.784720    | -3.870234 | 4.420502  |
| C | -2.243498 | 1.428765  | 0.305374  | H                   | -7.646842    | -2.469338 | 3.750736  |
| C | -1.131135 | 2.017062  | 2.330831  | C                   | -5.431873    | 1.425627  | -1.127299 |
| H | -3.785780 | 5.741518  | -3.349047 | O                   | -5.906639    | 0.916344  | -0.081876 |
| N | -2.975220 | 0.498083  | 0.929637  | O                   | -4.471966    | 0.869763  | -1.755027 |
| H | -2.454325 | 1.550532  | -0.753518 | C                   | -5.974200    | 2.722489  | -1.665917 |
| H | -0.412914 | 2.626831  | 2.873541  | H                   | -6.298244    | 2.579956  | -2.701463 |
| C | -2.837202 | 0.346310  | 2.251378  | H                   | -6.809572    | 3.075585  | -1.059398 |
| H | -3.494588 | -0.377602 | 2.724827  | H                   | -5.174552    | 3.469571  | -1.674060 |
| H | 6.499099  | -2.756770 | -2.783060 | H                   | -5.327638    | -1.540549 | -1.161832 |
| H | 3.156155  | -4.908874 | -1.178946 | C                   | 2.862345     | -1.458225 | -4.638849 |
| O | 6.257671  | -0.703095 | -1.011639 | H                   | 3.765380     | -2.050501 | -4.449555 |
| O | 2.684654  | -3.089042 | 0.784841  | H                   | 2.294277     | -1.943393 | -5.437143 |
| C | 7.370584  | -0.588212 | -1.864578 | H                   | 3.182798     | -0.473919 | -4.998823 |
| H | 7.072395  | -0.569821 | -2.922113 | 99                  |              |           |           |
| H | 7.846734  | 0.359771  | -1.610369 | cis-T25_C6_TSI Eopt | -2806.633599 |           |           |
| H | 8.082943  | -1.407266 | -1.704857 | Pd                  | -2.635373    | 0.579962  | 0.005785  |
| C | 1.759401  | -4.149051 | 0.743425  | C                   | -3.442572    | 2.656095  | -1.751172 |
| H | 1.062835  | -3.971106 | 1.563501  | C                   | -4.629537    | 0.638510  | -1.988988 |
| H | 1.201463  | -4.159312 | -0.202660 | C                   | -4.172222    | 3.245908  | -2.774889 |
| H | 2.252159  | -5.119029 | 0.887947  | C                   | -5.393836    | 1.168150  | -3.018627 |
| C | -2.513901 | 4.798114  | -0.349986 | H                   | -3.946217    | 4.271042  | -3.047379 |
| H | -2.687410 | 4.910550  | 0.718132  | H                   | -6.139213    | 0.535303  | -3.488210 |

|   |           |           |           |                      |              |           |           |
|---|-----------|-----------|-----------|----------------------|--------------|-----------|-----------|
| N | -3.707415 | 1.400748  | -1.401655 | H                    | -2.665061    | -4.802034 | -2.831824 |
| H | -5.746024 | 2.927477  | -4.207588 | C                    | 2.817568     | 4.516421  | 0.288627  |
| C | -5.159990 | 2.488498  | -3.405122 | H                    | 2.855789     | 4.605258  | -0.794925 |
| N | -3.832895 | -0.983798 | -0.457729 | C                    | 1.044523     | 1.345490  | -3.106011 |
| N | -1.774185 | 2.516730  | -0.043959 | H                    | 0.716836     | 1.282385  | -4.138391 |
| C | -4.715236 | -0.774509 | -1.469116 | C                    | -0.370907    | -1.066074 | 0.981999  |
| C | -2.329003 | 3.310094  | -0.982990 | C                    | -1.739446    | -0.325970 | 2.706558  |
| O | -5.507859 | -1.570222 | -1.953980 | C                    | -0.222384    | -1.411567 | -0.380064 |
| O | -2.007775 | 4.471340  | -1.268157 | C                    | 0.669092     | -1.354090 | 1.907447  |
| C | -3.680835 | -2.261303 | 0.088779  | C                    | -0.814199    | -0.696495 | 3.707532  |
| C | -4.060769 | -2.511143 | 1.416290  | H                    | -2.684442    | 0.135748  | 2.975799  |
| C | -3.057219 | -3.284705 | -0.644282 | H                    | -1.065042    | -1.275257 | -1.051739 |
| C | -3.830238 | -3.757796 | 2.000966  | C                    | 1.914883     | -1.789125 | 1.397157  |
| C | -2.831326 | -4.536356 | -0.067938 | C                    | 0.411865     | -1.154908 | 3.282328  |
| C | -3.222033 | -4.755836 | 1.247377  | H                    | 1.195170     | -1.380981 | 4.002973  |
| H | -3.045870 | -5.728381 | 1.698019  | N                    | -1.513014    | -0.454950 | 1.414418  |
| C | -0.757131 | 3.183544  | 0.754079  | H                    | 2.740918     | -1.929515 | 2.092182  |
| C | 0.548916  | 3.505487  | -0.026011 | Pd                   | 3.792414     | -0.946427 | -0.758804 |
| H | -1.157487 | 4.170084  | 1.036145  | C                    | 6.510186     | -0.307916 | -1.192149 |
| C | -0.440445 | 2.430733  | 2.029859  | O                    | 7.543217     | 0.263537  | -1.475063 |
| C | 1.673110  | 3.969496  | 0.882439  | O                    | 5.316297     | 0.176475  | -1.418443 |
| H | 0.280866  | 4.336712  | -0.687232 | N                    | 5.240683     | -2.243222 | -0.349624 |
| H | -1.379206 | 2.159257  | 2.522098  | C                    | 5.015377     | -3.515616 | -0.125845 |
| H | 0.092586  | 1.502083  | 1.793937  | C                    | 6.164077     | -4.475157 | 0.041991  |
| C | 0.403267  | 3.286843  | 2.959204  | H                    | 6.900106     | -4.093132 | 0.756065  |
| C | 1.623803  | 3.843598  | 2.275270  | H                    | 6.678108     | -4.619063 | -0.915368 |
| H | -0.209563 | 4.119456  | 3.336065  | H                    | 5.779927     | -5.436004 | 0.384865  |
| H | 0.704881  | 2.706390  | 3.840402  | O                    | 3.837289     | -3.996075 | -0.045339 |
| C | 2.721433  | 4.261078  | 3.036502  | C                    | 6.567129     | -1.685823 | -0.518698 |
| C | 3.900874  | 4.927220  | 1.051003  | C                    | 2.102854     | -2.038913 | 0.046220  |
| C | 1.011794  | 2.389697  | -0.933595 | H                    | 3.018118     | -3.000064 | -0.132440 |
| C | 3.852864  | 4.797038  | 2.438588  | H                    | 7.206348     | -2.326877 | -1.137393 |
| H | 2.679080  | 4.155698  | 4.118897  | C                    | 0.968585     | -1.935107 | -0.810874 |
| H | 4.781106  | 5.339905  | 0.566862  | H                    | 1.072225     | -2.220546 | -1.854896 |
| C | 1.954967  | 1.442003  | -0.536770 | H                    | 7.073738     | -1.557762 | 0.448173  |
| C | 0.543793  | 2.315373  | -2.246732 | C                    | -1.169901    | -0.514956 | 5.152500  |
| H | 4.696877  | 5.107682  | 3.048095  | H                    | -1.982509    | -1.189740 | 5.447353  |
| N | 2.429475  | 0.502817  | -1.362950 | H                    | -0.312836    | -0.722822 | 5.798749  |
| H | 2.367955  | 1.449045  | 0.466231  | H                    | -1.506596    | 0.508451  | 5.354479  |
| H | -0.183647 | 3.046355  | -2.590212 | 107                  |              |           |           |
| C | 1.999397  | 0.461666  | -2.630768 | cis-T25_C6_TSII Eopt | -2944.272148 |           |           |
| H | 2.443619  | -0.299691 | -3.262933 | Pd                   | -3.000844    | 0.498334  | 0.021945  |
| H | -4.124755 | -3.959871 | 3.024035  | C                    | -3.767872    | 2.601330  | -1.721220 |
| H | -2.351581 | -5.330512 | -0.627462 | C                    | -4.933314    | 0.581320  | -2.031826 |
| O | -4.632812 | -1.462626 | 2.063711  | C                    | -4.468687    | 3.204312  | -2.757476 |
| O | -2.681161 | -2.945593 | -1.900170 | C                    | -5.666768    | 1.123479  | -3.077069 |
| C | -5.077483 | -1.679375 | 3.379124  | H                    | -4.241403    | 4.235780  | -3.003643 |
| H | -4.245546 | -1.931167 | 4.053339  | H                    | -6.390506    | 0.493456  | -3.582869 |
| H | -5.532786 | -0.741397 | 3.702306  | N                    | -4.036467    | 1.339152  | -1.400915 |
| H | -5.827153 | -2.479417 | 3.426692  | H                    | -5.992209    | 2.900952  | -4.246602 |
| C | -2.026818 | -3.924207 | -2.671223 | C                    | -5.429883    | 2.451951  | -3.432774 |
| H | -1.815062 | -3.455271 | -3.633576 | N                    | -4.170906    | -1.064451 | -0.508359 |
| H | -1.084625 | -4.240391 | -2.203162 | N                    | -2.147403    | 2.443102  | 0.029756  |

|   |           |           |           |    |           |           |                                   |
|---|-----------|-----------|-----------|----|-----------|-----------|-----------------------------------|
| C | -5.019550 | -0.843430 | -1.545725 | C  | -0.703324 | -1.065971 | 0.998272                          |
| C | -2.689406 | 3.252311  | -0.902285 | C  | -2.153466 | -0.499017 | 2.720562                          |
| O | -5.781676 | -1.639123 | -2.077590 | C  | -0.508222 | -1.336956 | -0.375051                         |
| O | -2.389325 | 4.430215  | -1.140741 | C  | 0.348360  | -1.299295 | 1.925794                          |
| C | -4.000702 | -2.356883 | -0.004634 | C  | -1.216824 | -0.843385 | 3.720791                          |
| C | -4.417942 | -2.670196 | 1.297749  | H  | -3.132408 | -0.113907 | 2.989036                          |
| C | -3.318879 | -3.330579 | -0.753263 | H  | -1.350924 | -1.252252 | -1.055266                         |
| C | -4.170189 | -3.932669 | 1.840544  | C  | 1.642176  | -1.581171 | 1.424881                          |
| C | -3.075285 | -4.597659 | -0.219511 | C  | 0.049990  | -1.183731 | 3.302852                          |
| C | -3.506247 | -4.881635 | 1.070918  | H  | 0.836878  | -1.373670 | 4.029841                          |
| H | -3.318279 | -5.866592 | 1.488805  | N  | -1.895010 | -0.561842 | 1.429873                          |
| C | -1.185594 | 3.112263  | 0.893406  | H  | 2.480657  | -1.670968 | 2.113121                          |
| C | 0.129476  | 3.536493  | 0.181485  | C  | 1.842353  | -1.715992 | 0.066824                          |
| H | -1.640343 | 4.064655  | 1.210512  | C  | 0.732613  | -1.713648 | -0.817150                         |
| C | -0.883023 | 2.309911  | 2.141720  | H  | 0.889533  | -1.917058 | -1.873256                         |
| C | 1.191633  | 4.009427  | 1.158563  | Pd | 3.529317  | -0.889369 | -0.758070                         |
| H | -0.158118 | 4.391142  | -0.439997 | C  | 3.350870  | -3.133098 | -0.317517                         |
| H | -1.826670 | 1.977803  | 2.583818  | C  | 4.656326  | -2.618047 | -0.512088                         |
| H | -0.304290 | 1.416581  | 1.880455  | H  | 3.119265  | -3.525811 | 0.665661                          |
| C | -0.111850 | 3.148918  | 3.146117  | H  | 2.852788  | -3.617416 | -1.152205                         |
| C | 1.099597  | 3.805890  | 2.539846  | H  | 5.152450  | -2.709668 | -1.474305                         |
| H | -0.776610 | 3.927671  | 3.549473  | C  | 5.491794  | -2.388729 | 0.688192                          |
| H | 0.190072  | 2.532008  | 4.002125  | O  | 5.076755  | -2.407408 | 1.832690                          |
| C | 2.141856  | 4.243848  | 3.365029  | O  | 6.757193  | -2.130936 | 0.354268                          |
| C | 3.347906  | 5.089688  | 1.466640  | C  | 7.620231  | -1.745727 | 1.430149                          |
| C | 0.700754  | 2.513320  | -0.775749 | C  | 8.923462  | -1.295673 | 0.816105                          |
| C | 3.258884  | 4.879048  | 2.842402  | H  | 7.751732  | -2.599961 | 2.103568                          |
| H | 2.066397  | 4.076289  | 4.437750  | H  | 7.135408  | -0.946007 | 1.998902                          |
| H | 4.215563  | 5.585829  | 1.041051  | H  | 9.619835  | -0.983325 | 1.601061                          |
| C | 1.664739  | 1.578239  | -0.397124 | H  | 9.387077  | -2.105964 | 0.244947                          |
| C | 0.333245  | 2.537404  | -2.122882 | H  | 8.754682  | -0.449751 | 0.142741                          |
| H | 4.058566  | 5.206470  | 3.501093  | C  | 5.309727  | -0.160017 | -2.771843                         |
| N | 2.263901  | 0.759167  | -1.268519 | O  | 4.547615  | -0.883348 | -3.426189                         |
| H | 1.988450  | 1.496436  | 0.635833  | O  | 5.177466  | 0.111940  | -1.517922                         |
| H | -0.418388 | 3.251621  | -2.450540 | C  | 6.518924  | 0.490564  | -3.415451                         |
| C | 1.941946  | 0.823740  | -2.569111 | H  | 7.430592  | 0.140030  | -2.920381                         |
| H | 2.509261  | 0.169117  | -3.226461 | H  | 6.561028  | 0.250385  | -4.479144                         |
| H | -4.493854 | -4.184257 | 2.843649  | H  | 6.474498  | 1.575738  | -3.279008                         |
| H | -2.554256 | -5.354794 | -0.793486 | C  | -1.607981 | -0.756336 | 5.165497                          |
| O | -5.043024 | -1.665696 | 1.964666  | H  | -2.356007 | -1.517557 | 5.418238                          |
| O | -2.907824 | -2.928179 | -1.979565 | H  | -0.744065 | -0.908174 | 5.818250                          |
| C | -5.517997 | -1.944614 | 3.257540  | H  | -2.044722 | 0.220779  | 5.402073                          |
| H | -4.698153 | -2.196892 | 3.946173  |    |           |           | 107                               |
| H | -6.010261 | -1.033003 | 3.601244  |    |           |           | cis-T25_C6_TSIIIeopt -2944.278533 |
| H | -6.244451 | -2.767260 | 3.253735  | Pd | -2.930591 | 0.200781  | -0.274947                         |
| C | -2.190317 | -3.850379 | -2.762964 | C  | -3.648925 | 1.926453  | -2.408546                         |
| H | -1.956620 | -3.334142 | -3.695498 | C  | -4.342944 | -0.306186 | -2.664153                         |
| H | -1.256487 | -4.154310 | -2.270183 | C  | -4.237124 | 2.282942  | -3.615068                         |
| H | -2.790124 | -4.741797 | -2.985304 | C  | -4.941869 | -0.018931 | -3.881910                         |
| C | 2.321193  | 4.656340  | 0.641211  | H  | -4.168625 | 3.316109  | -3.937664                         |
| H | 2.390723  | 4.808776  | -0.433726 | H  | -5.429044 | -0.823616 | -4.421998                         |
| C | 0.961002  | 1.690527  | -3.027887 | N  | -3.727770 | 0.666796  | -1.992405                         |
| H | 0.713254  | 1.712066  | -4.084310 | H  | -5.352338 | 1.546105  | -5.301540                         |

|   |           |           |           |                     |              |           |           |
|---|-----------|-----------|-----------|---------------------|--------------|-----------|-----------|
| C | -4.886967 | 1.293490  | -4.353012 | H                   | 1.540512     | 5.567217  | -0.870863 |
| N | -3.702763 | -1.598675 | -0.784889 | C                   | 1.022626     | 1.659974  | -3.097148 |
| N | -2.346769 | 2.248096  | -0.427811 | H                   | 0.823778     | 1.439311  | -4.141123 |
| C | -4.292941 | -1.661720 | -2.007465 | C                   | -0.919560    | -0.889934 | 1.636893  |
| C | -2.884772 | 2.852914  | -1.505869 | C                   | -2.906864    | -0.278368 | 2.665650  |
| O | -4.752229 | -2.645931 | -2.569888 | C                   | -0.221869    | -1.235576 | 0.457006  |
| O | -2.782923 | 4.042984  | -1.834417 | C                   | -0.251900    | -0.930816 | 2.888529  |
| C | -3.413873 | -2.777773 | -0.091048 | C                   | -2.365806    | -0.426728 | 3.960823  |
| C | -4.089767 | -3.087659 | 1.098518  | H                   | -3.935274    | 0.041244  | 2.529250  |
| C | -2.372262 | -3.617389 | -0.520968 | C                   | 1.122601     | -1.465903 | 0.512843  |
| C | -3.739764 | -4.216678 | 1.842314  | H                   | -0.767195    | -1.297479 | -0.480281 |
| C | -2.022759 | -4.751982 | 0.213779  | C                   | 1.156665     | -1.091604 | 2.896906  |
| C | -2.713468 | -5.036434 | 1.385741  | C                   | -1.018503    | -0.703657 | 4.051111  |
| H | -2.444146 | -5.918598 | 1.959598  | C                   | 1.850096     | -1.287790 | 1.724732  |
| C | -1.583848 | 3.144319  | 0.432092  | H                   | 1.662552     | -1.696673 | -0.401284 |
| C | -0.338127 | 3.779894  | -0.254867 | H                   | -0.531887    | -0.744365 | 5.023402  |
| H | -2.228155 | 4.003812  | 0.679340  | N                   | -2.210102    | -0.467700 | 1.560494  |
| C | -1.170076 | 2.476556  | 1.728193  | H                   | 1.690439     | -0.982478 | 3.838205  |
| C | 0.514310  | 4.563068  | 0.725213  | Pd                  | 3.711419     | -0.093981 | -0.245803 |
| H | -0.746479 | 4.484121  | -0.986239 | C                   | 3.324483     | -1.123839 | 1.690097  |
| H | -2.036496 | 1.979503  | 2.168698  | C                   | 4.204263     | -1.828385 | 0.824337  |
| H | -0.418689 | 1.704784  | 1.518758  | H                   | 3.398588     | 0.474501  | 1.205391  |
| C | -0.622539 | 3.495578  | 2.714548  | H                   | 3.786586     | -0.758477 | 2.608078  |
| C | 0.415161  | 4.404583  | 2.111599  | H                   | 3.849232     | -2.630288 | 0.182235  |
| H | -1.454915 | 4.110473  | 3.089134  | C                   | 5.650572     | -1.806741 | 1.150044  |
| H | -0.206173 | 2.984478  | 3.591999  | O                   | 6.141345     | -1.140450 | 2.037319  |
| C | 1.275787  | 5.129230  | 2.944260  | O                   | 6.333886     | -2.603193 | 0.327007  |
| C | 2.312660  | 6.167536  | 1.040826  | C                   | 7.758013     | -2.433206 | 0.361335  |
| C | 0.504614  | 2.799233  | -1.039697 | C                   | 8.332607     | -3.255170 | -0.765508 |
| C | 2.219154  | 6.002518  | 2.422590  | H                   | 8.130417     | -2.750567 | 1.341195  |
| H | 1.197345  | 4.997610  | 4.021804  | H                   | 7.971223     | -1.368659 | 0.233863  |
| H | 3.045086  | 6.848695  | 0.616951  | H                   | 9.424132     | -3.169446 | -0.770150 |
| C | 1.621101  | 2.168930  | -0.492962 | H                   | 8.069333     | -4.312613 | -0.659425 |
| C | 0.211063  | 2.527124  | -2.378045 | H                   | 7.953790     | -2.891708 | -1.725008 |
| H | 2.881007  | 6.551108  | 3.087012  | C                   | 5.491364     | -0.788113 | -2.269582 |
| N | 2.403189  | 1.323739  | -1.183141 | O                   | 6.243923     | -0.227275 | -1.472581 |
| H | 1.915831  | 2.361473  | 0.532741  | O                   | 4.211910     | -0.917408 | -2.104475 |
| H | -0.635608 | 3.022142  | -2.846295 | C                   | 6.016623     | -1.414576 | -3.546488 |
| C | 2.111585  | 1.073469  | -2.468485 | H                   | 5.393596     | -1.130831 | -4.399920 |
| H | 2.778828  | 0.375169  | -2.965387 | H                   | 7.051071     | -1.112932 | -3.721050 |
| H | -4.260195 | -4.466515 | 2.759355  | H                   | 5.968048     | -2.505781 | -3.457465 |
| H | -1.222728 | -5.405204 | -0.113759 | C                   | -3.239815    | -0.225745 | 5.162303  |
| O | -5.062636 | -2.212053 | 1.458970  | H                   | -3.920395    | -1.074817 | 5.299876  |
| O | -1.740790 | -3.215880 | -1.649725 | H                   | -2.643236    | -0.127698 | 6.073392  |
| C | -5.798073 | -2.504437 | 2.620256  | H                   | -3.857644    | 0.673182  | 5.061345  |
| H | -5.157513 | -2.517361 | 3.514121  | 99                  |              |           |           |
| H | -6.538008 | -1.707895 | 2.717780  | cis-T25_C7_IN2 Eopt | -2806.672827 |           |           |
| H | -6.315265 | -3.469075 | 2.540082  | Pd                  | -2.365446    | -0.367882 | -0.179026 |
| C | -0.668625 | -4.001293 | -2.114500 | C                   | -3.784484    | 0.927341  | -2.267339 |
| H | -0.302009 | -3.505868 | -3.014761 | C                   | -3.373811    | -1.362132 | -2.620464 |
| H | 0.140658  | -4.054603 | -1.373487 | C                   | -4.480467    | 1.022155  | -3.464975 |
| H | -0.995938 | -5.017236 | -2.367984 | C                   | -4.052802    | -1.333993 | -3.830281 |
| C | 1.465598  | 5.451285  | 0.208314  | H                   | -4.887197    | 1.985599  | -3.752501 |

|    |           |           |           |    |           |           |                                  |
|----|-----------|-----------|-----------|----|-----------|-----------|----------------------------------|
| H  | -4.114888 | -2.248052 | -4.410944 | H  | -2.491180 | 4.083266  | 3.039067                         |
| N  | -3.269041 | -0.243861 | -1.903697 | H  | -1.141637 | 3.235876  | 3.780007                         |
| H  | -5.153619 | -0.078043 | -5.187869 | C  | 0.181077  | 5.387045  | 2.950024                         |
| C  | -4.614474 | -0.126337 | -4.245974 | C  | 1.183222  | 6.351471  | 0.990417                         |
| N  | -2.170253 | -2.291417 | -0.796837 | C  | -0.324256 | 2.843056  | -1.023202                        |
| N  | -2.789628 | 1.698527  | -0.240680 | C  | 1.061407  | 6.294424  | 2.378287                         |
| C  | -2.655470 | -2.553527 | -2.041000 | H  | 0.084844  | 5.334316  | 4.032727                         |
| C  | -3.474491 | 2.068868  | -1.340762 | H  | 1.868776  | 7.055018  | 0.526485                         |
| O  | -2.551910 | -3.588544 | -2.684335 | C  | 0.795967  | 2.205534  | -0.497376                        |
| O  | -3.796464 | 3.217125  | -1.674610 | C  | -0.569885 | 2.678858  | -2.387434                        |
| C  | -1.183037 | -3.123039 | -0.260385 | H  | 1.653994  | 6.951365  | 3.009062                         |
| C  | -1.400629 | -3.826963 | 0.933002  | N  | 1.613043  | 1.442214  | -1.238247                        |
| C  | 0.094388  | -3.158607 | -0.848942 | H  | 1.050692  | 2.301261  | 0.550963                         |
| C  | -0.362431 | -4.543538 | 1.535221  | H  | -1.445909 | 3.148645  | -2.827617                        |
| C  | 1.126930  | -3.894730 | -0.266191 | C  | 1.394629  | 1.324694  | -2.557195                        |
| C  | 0.886353  | -4.570480 | 0.925329  | H  | 2.134072  | 0.755168  | -3.108713                        |
| H  | 1.694270  | -5.129805 | 1.388085  | C  | 2.496033  | -0.264600 | 2.411114                         |
| C  | -0.220458 | -0.668937 | 1.947621  | H  | 3.552544  | -0.085368 | 2.595196                         |
| C  | -2.391229 | -0.981760 | 2.708236  | H  | -0.520222 | -5.084084 | 2.460901                         |
| C  | 0.657632  | -0.443555 | 0.872642  | H  | 2.109954  | -3.935374 | -0.719097                        |
| C  | 0.284957  | -0.762609 | 3.271825  | O  | -2.654222 | -3.736793 | 1.443811                         |
| C  | -1.976136 | -1.152669 | 4.048490  | O  | 0.236088  | -2.402027 | -1.960643                        |
| H  | -3.445398 | -1.030851 | 2.451655  | C  | -2.921440 | -4.446463 | 2.626700                         |
| C  | 2.005608  | -0.207998 | 1.074201  | H  | -2.296645 | -4.094467 | 3.459590                         |
| H  | 0.224156  | -0.429831 | -0.124190 | H  | -3.972330 | -4.260899 | 2.858154                         |
| C  | 1.670836  | -0.555458 | 3.472337  | H  | -2.768355 | -5.525440 | 2.495136                         |
| C  | -0.630810 | -1.021886 | 4.313010  | C  | 1.482833  | -2.423723 | -2.616114                        |
| H  | -0.263350 | -1.106433 | 5.333961  | H  | 1.366994  | -1.794997 | -3.499889                        |
| N  | -1.564482 | -0.735969 | 1.712034  | H  | 2.277496  | -2.005117 | -1.982658                        |
| H  | 2.067490  | -0.610499 | 4.483533  | H  | 1.753713  | -3.440049 | -2.927963                        |
| Pd | 3.140479  | 0.279865  | -0.495243 | C  | 0.424229  | 5.498881  | 0.202233                         |
| C  | 5.569505  | 0.461869  | -1.995238 | H  | 0.522178  | 5.534572  | -0.880733                        |
| O  | 6.461934  | 0.674809  | -2.794847 | C  | 0.303750  | 1.927012  | -3.163437                        |
| O  | 4.314294  | 0.741745  | -2.140036 | H  | 0.147966  | 1.804216  | -4.230050                        |
| N  | 4.789167  | -0.823826 | -0.031358 | H  | 6.278727  | 0.640042  | 0.024533                         |
| C  | 4.862102  | -2.011723 | 0.452232  | H  | 2.996263  | -2.090356 | 0.780717                         |
| C  | 6.116635  | -2.818977 | 0.576199  | C  | -2.998459 | -1.419446 | 5.113501                         |
| H  | 5.909130  | -3.717326 | 1.158590  | H  | -2.525625 | -1.535927 | 6.092626                         |
| H  | 6.909101  | -2.244201 | 1.062628  | H  | -3.721789 | -0.598686 | 5.185031                         |
| H  | 6.478001  | -3.117421 | -0.413940 | H  | -3.565983 | -2.333071 | 4.902309                         |
| O  | 3.792716  | -2.656705 | 0.891264  |    |           |           | 107                              |
| C  | 5.944964  | -0.171820 | -0.634675 |    |           |           | cis-T25_C7_IN3 Eopt -2944.298882 |
| H  | 6.785166  | -0.853084 | -0.786517 | Pd | -2.704923 | 0.208414  | 0.116160                         |
| C  | -2.329287 | 2.812398  | 0.569617  | C  | -4.079264 | 1.725149  | -1.849083                        |
| C  | -1.250583 | 3.673474  | -0.162683 | C  | -4.338261 | -0.606847 | -2.033076                        |
| H  | -3.180195 | 3.493088  | 0.724707  | C  | -4.928250 | 1.938803  | -2.926743                        |
| C  | -1.836769 | 2.362046  | 1.930571  | C  | -5.191071 | -0.462158 | -3.118413                        |
| C  | -0.466642 | 4.579275  | 0.770054  | H  | -5.119994 | 2.958990  | -3.241064                        |
| H  | -1.816273 | 4.306979  | -0.854142 | H  | -5.589442 | -1.355662 | -3.586948                        |
| H  | -2.595297 | 1.722159  | 2.392554  | N  | -3.821979 | 0.479192  | -1.459553                        |
| H  | -0.928673 | 1.760238  | 1.817620  | H  | -6.154498 | 0.968522  | -4.405661                        |
| C  | -1.547722 | 3.562829  | 2.814970  | C  | -5.487593 | 0.827810  | -3.559672                        |
| C  | -0.591215 | 4.525382  | 2.163169  | N  | -3.123761 | -1.726573 | -0.325087                        |

|   |           |           |           |                     |              |           |           |
|---|-----------|-----------|-----------|---------------------|--------------|-----------|-----------|
| N | -2.587439 | 2.310206  | -0.080278 | H                   | -1.630621    | -4.684401 | 2.866415  |
| C | -3.864268 | -1.914758 | -1.451668 | H                   | 0.552824     | -4.413242 | -0.815620 |
| C | -3.328254 | 2.790233  | -1.098858 | O                   | -3.525057    | -2.887777 | 2.099618  |
| O | -4.145450 | -2.971868 | -1.998937 | O                   | -1.100887    | -2.535567 | -1.865489 |
| O | -3.385545 | 3.959906  | -1.501611 | C                   | -3.738226    | -3.456387 | 3.366388  |
| C | -2.289290 | -2.756498 | 0.122407  | H                   | -2.912182    | -3.231568 | 4.055523  |
| C | -2.445498 | -3.318101 | 1.397809  | H                   | -4.658678    | -3.008084 | 3.746457  |
| C | -1.199268 | -3.158101 | -0.671826 | H                   | -3.868751    | -4.544637 | 3.305061  |
| C | -1.522317 | -4.249855 | 1.879803  | C                   | -0.210520    | -3.078380 | -2.820667 |
| C | -0.286497 | -4.104715 | -0.203001 | H                   | -0.420944    | -2.553083 | -3.754023 |
| C | -0.456792 | -4.632203 | 1.071581  | H                   | 0.837873     | -2.908172 | -2.555997 |
| H | 0.255926  | -5.362245 | 1.445246  | H                   | -0.397602    | -4.149587 | -2.963233 |
| C | -0.450451 | -0.548110 | 2.034547  | C                   | 1.528716     | 5.116278  | -0.499550 |
| C | -2.533926 | -0.194547 | 3.001718  | H                   | 1.455938     | 5.048841  | -1.583085 |
| C | 0.342880  | -0.640276 | 0.873860  | C                   | -0.149423    | 1.147781  | -3.168496 |
| C | 0.138504  | -0.697821 | 3.318535  | H                   | -0.588813    | 0.861921  | -4.118333 |
| C | -2.047792 | -0.391278 | 4.313128  | Pd                  | 2.802555     | -0.699825 | -0.727852 |
| H | -3.582456 | 0.035646  | 2.837292  | C                   | 3.387653     | -2.776560 | -0.209511 |
| C | 1.714929  | -0.776209 | 0.959149  | C                   | 4.537708     | -2.029796 | -0.328190 |
| H | -0.174793 | -0.575066 | -0.078550 | H                   | 3.008190     | -3.061678 | 0.766882  |
| C | 1.537941  | -0.875243 | 3.388160  | H                   | 2.969922     | -3.251742 | -1.092782 |
| C | -0.698490 | -0.626028 | 4.451277  | H                   | 5.013475     | -1.893906 | -1.293362 |
| H | -0.261315 | -0.748240 | 5.440487  | C                   | 5.359740     | -1.614393 | 0.838199  |
| N | -1.778988 | -0.250375 | 1.922178  | O                   | 5.204770     | -1.984638 | 1.983297  |
| H | 2.007700  | -0.984415 | 4.362928  | O                   | 6.326904     | -0.780836 | 0.448242  |
| C | -1.712632 | 3.294314  | 0.530896  | C                   | 7.186029     | -0.296542 | 1.489630  |
| C | -0.563534 | 3.745384  | -0.428813 | C                   | 8.176548     | 0.646962  | 0.853104  |
| H | -2.301479 | 4.204863  | 0.718203  | H                   | 7.674179     | -1.152012 | 1.968447  |
| C | -1.146707 | 2.812621  | 1.852164  | H                   | 6.571048     | 0.199561  | 2.247883  |
| C | 0.546204  | 4.495756  | 0.281977  | H                   | 8.853740     | 1.045280  | 1.615397  |
| H | -1.038914 | 4.428577  | -1.141329 | H                   | 8.773923     | 0.131449  | 0.095121  |
| H | -1.962669 | 2.441699  | 2.480451  | H                   | 7.660878     | 1.485040  | 0.374666  |
| H | -0.464479 | 1.973097  | 1.679010  | C                   | 3.629140     | -1.239314 | -3.453293 |
| C | -0.408231 | 3.938405  | 2.556396  | O                   | 2.849346     | -2.196805 | -3.337444 |
| C | 0.636500  | 4.573035  | 1.676759  | O                   | 3.885480     | -0.380785 | -2.530126 |
| H | -1.131737 | 4.706934  | 2.867901  | C                   | 4.343667     | -0.982723 | -4.765858 |
| H | 0.060056  | 3.568552  | 3.476749  | H                   | 5.400736     | -0.764057 | -4.590230 |
| C | 1.709593  | 5.263468  | 2.251513  | H                   | 4.237575     | -1.839862 | -5.433201 |
| C | 2.586944  | 5.801308  | 0.079432  | H                   | 3.907395     | -0.098479 | -5.244283 |
| C | -0.025711 | 2.589927  | -1.239216 | C                   | -2.990001    | -0.302441 | 5.476921  |
| C | 2.678987  | 5.874444  | 1.468942  | H                   | -2.461801    | -0.451826 | 6.422760  |
| H | 1.778238  | 5.314252  | 3.336387  | H                   | -3.482840    | 0.675940  | 5.517432  |
| H | 3.337616  | 6.274234  | -0.547576 | H                   | -3.779605    | -1.059772 | 5.409054  |
| C | 1.008060  | 1.779422  | -0.780591 | 107                 |              |           |           |
| C | -0.600151 | 2.258189  | -2.468615 | cis-T25_C7_IN4 Eopt | -2944.343260 |           |           |
| H | 3.504909  | 6.402659  | 1.937515  | Pd                  | -2.224337    | 0.681531  | -0.329655 |
| N | 1.432348  | 0.699090  | -1.452381 | C                   | -2.914361    | 2.120525  | -2.674739 |
| H | 1.505291  | 1.987983  | 0.159481  | C                   | -3.436107    | -0.168525 | -2.742714 |
| H | -1.404192 | 2.876064  | -2.860086 | C                   | -3.466573    | 2.320023  | -3.932827 |
| C | 0.871038  | 0.380870  | -2.628034 | C                   | -3.997070    | -0.040261 | -4.005784 |
| H | 1.249845  | -0.511157 | -3.115362 | H                   | -3.451515    | 3.320821  | -4.350563 |
| C | 2.302940  | -0.890218 | 2.246001  | H                   | -4.412750    | -0.924127 | -4.477448 |
| H | 3.373873  | -1.020055 | 2.348533  | N                   | -2.908650    | 0.899007  | -2.147060 |



|   |           |           |           |                     |              |           |           |
|---|-----------|-----------|-----------|---------------------|--------------|-----------|-----------|
| H | -4.444467 | 1.349950  | -5.587103 | C                   | 2.765643     | 4.823054  | -0.793494 |
| C | -4.008021 | 1.221201  | -4.600621 | H                   | 2.801924     | 4.653932  | -1.867727 |
| N | -2.890757 | -1.219460 | -0.689142 | C                   | 0.865632     | 0.844323  | -3.237473 |
| N | -1.750810 | 2.709096  | -0.674979 | H                   | 0.558822     | 0.524305  | -4.227920 |
| C | -3.388958 | -1.435803 | -1.935389 | Pd                  | 3.198209     | -0.760231 | 0.004242  |
| C | -2.216213 | 3.167273  | -1.855884 | C                   | 5.137645     | -0.445767 | 1.538446  |
| O | -3.801208 | -2.486280 | -2.411552 | O                   | 4.751282     | 0.574780  | 0.908313  |
| O | -2.048691 | 4.292050  | -2.344261 | O                   | 4.536346     | -1.564294 | 1.375408  |
| C | -2.736296 | -2.322980 | 0.154915  | C                   | 6.320246     | -0.388938 | 2.459685  |
| C | -3.466339 | -2.410431 | 1.351029  | H                   | 7.215407     | -0.695262 | 1.906742  |
| C | -1.824172 | -3.345133 | -0.160566 | H                   | 6.468464     | 0.630117  | 2.822429  |
| C | -3.270973 | -3.480320 | 2.226889  | H                   | 6.186752     | -1.081710 | 3.293878  |
| C | -1.660641 | -4.440306 | 0.689450  | C                   | -0.920876    | -0.437429 | 2.237787  |
| C | -2.375143 | -4.485594 | 1.880218  | N                   | -1.849412    | 0.410061  | 1.700975  |
| H | -2.234956 | -5.327009 | 2.552782  | C                   | -2.706848    | 1.028561  | 2.493003  |
| C | -0.820986 | 3.620794  | -0.026034 | C                   | -2.715904    | 0.912789  | 3.897452  |
| C | 0.488548  | 3.788800  | -0.861176 | C                   | -1.775120    | 0.079094  | 4.459230  |
| H | -1.280633 | 4.620000  | -0.004355 | C                   | -0.865190    | -0.626010 | 3.647934  |
| C | -0.505528 | 3.216186  | 1.400197  | C                   | 0.088949     | -1.531044 | 4.169839  |
| C | 1.617156  | 4.442685  | -0.089091 | C                   | 0.844964     | -2.066128 | 1.918790  |
| H | 0.216650  | 4.442739  | -1.696474 | C                   | -0.043163    | -1.149445 | 1.396812  |
| H | -1.441214 | 3.084644  | 1.950248  | H                   | -0.124664    | -0.984478 | 0.326971  |
| H | 0.010152  | 2.247567  | 1.414124  | C                   | 1.700252     | -2.952076 | 1.057543  |
| C | 0.339820  | 4.279076  | 2.084446  | C                   | 2.028742     | -2.394998 | -0.308322 |
| C | 1.566362  | 4.647787  | 1.293598  | C                   | 2.867884     | -3.313727 | -1.112795 |
| H | -0.273518 | 5.180648  | 2.234205  | O                   | 3.524898     | -4.240941 | -0.690288 |
| H | 0.633529  | 3.941298  | 3.085690  | O                   | 2.818752     | -2.995996 | -2.437850 |
| C | 2.668135  | 5.221800  | 1.937342  | C                   | 3.745826     | -3.692894 | -3.276532 |
| C | 3.851920  | 5.394083  | -0.147416 | C                   | 5.119946     | -3.060516 | -3.203992 |
| C | 0.922375  | 2.475114  | -1.463311 | H                   | 5.806678     | -3.564853 | -3.892607 |
| C | 3.803395  | 5.593438  | 1.231769  | H                   | 5.521936     | -3.146165 | -2.190465 |
| H | 2.626962  | 5.370703  | 3.014487  | H                   | 5.073506     | -2.000428 | -3.473913 |
| H | 4.735090  | 5.676912  | -0.713119 | H                   | 3.320597     | -3.620868 | -4.281222 |
| C | 1.703719  | 1.573306  | -0.750032 | H                   | 3.778646     | -4.742530 | -2.972061 |
| C | 0.518006  | 2.095010  | -2.744654 | H                   | 1.145762     | -2.093981 | -0.876188 |
| H | 4.650478  | 6.030522  | 1.753093  | H                   | 1.166990     | -3.912852 | 0.951859  |
| N | 2.029804  | 0.361842  | -1.224436 | H                   | 0.148559     | -1.667623 | 5.246511  |
| H | 2.105993  | 1.826290  | 0.225904  | H                   | -1.733312    | -0.053622 | 5.538677  |
| H | -0.072994 | 2.785084  | -3.341153 | H                   | -3.433320    | 1.666307  | 1.996743  |
| C | 1.615781  | -0.010739 | -2.443869 | C                   | 0.908691     | -2.232611 | 3.327091  |
| H | 1.912446  | -1.003053 | -2.766246 | H                   | 1.629062     | -2.938595 | 3.731774  |
| H | -3.821464 | -3.547792 | 3.157696  | H                   | 2.633593     | -3.189548 | 1.578684  |
| H | -0.974194 | -5.240784 | 0.438800  | C                   | -3.723948    | 1.678734  | 4.701645  |
| O | -4.349298 | -1.403322 | 1.571305  | H                   | -3.615287    | 1.470591  | 5.769694  |
| O | -1.117118 | -3.161644 | -1.300092 | H                   | -3.611585    | 2.759608  | 4.556822  |
| C | -5.129644 | -1.469754 | 2.738011  | H                   | -4.747914    | 1.417385  | 4.409807  |
| H | -4.508573 | -1.432550 | 3.643289  | 107                 |              |           |           |
| H | -5.782309 | -0.594631 | 2.712877  | cis-T25_C7_IN5 Eopt | -2944.309232 |           |           |
| H | -5.746903 | -2.377268 | 2.760341  | Pd                  | -1.139641    | -1.974708 | 0.298503  |
| C | -0.448659 | -4.277485 | -1.843675 | C                   | -0.930529    | -3.382470 | 2.743166  |
| H | 0.357465  | -4.634581 | -1.189954 | C                   | -2.890993    | -2.105585 | 2.519258  |
| H | -1.151971 | -5.096117 | -2.037133 | C                   | -1.346967    | -3.869493 | 3.974992  |
| H | -0.008390 | -3.935901 | -2.781231 | C                   | -3.361887    | -2.546176 | 3.748086  |

|   |           |           |           |                     |              |           |           |
|---|-----------|-----------|-----------|---------------------|--------------|-----------|-----------|
| H | -0.697756 | -4.558559 | 4.504217  | H                   | -3.629305    | 3.426371  | 1.598046  |
| H | -4.323284 | -2.183014 | 4.094738  | H                   | -4.576467    | 1.987142  | 2.123941  |
| N | -1.703605 | -2.523143 | 2.084470  | H                   | -3.052109    | 2.427971  | 2.949554  |
| H | -2.923418 | -3.803958 | 5.438907  | C                   | 5.177753     | -1.429742 | 1.736755  |
| C | -2.575969 | -3.439897 | 4.476153  | H                   | 4.909844     | -1.260608 | 2.777742  |
| N | -2.968374 | -1.046575 | 0.399176  | C                   | 0.699307     | 0.442749  | 3.239455  |
| N | 0.552402  | -3.053194 | 0.899717  | H                   | 0.136482     | 0.559840  | 4.160033  |
| C | -3.601662 | -1.156421 | 1.596200  | Pd                  | 1.615926     | 3.014787  | -0.293695 |
| C | 0.398332  | -3.657906 | 2.098138  | H                   | 1.897074     | 4.207564  | -1.220677 |
| O | -4.633674 | -0.600485 | 1.959441  | C                   | 4.035712     | 1.900402  | -1.189958 |
| O | 1.239552  | -4.309740 | 2.726569  | O                   | 3.654275     | 2.797964  | -0.338750 |
| C | -3.392582 | -0.040224 | -0.471566 | O                   | 3.282676     | 1.181738  | -1.855442 |
| C | -3.819683 | -0.347059 | -1.776714 | C                   | 5.540701     | 1.757375  | -1.275212 |
| C | -3.329159 | 1.305614  | -0.083467 | H                   | 5.901993     | 1.261271  | -0.368382 |
| C | -4.155220 | 0.673627  | -2.666609 | H                   | 5.812489     | 1.147104  | -2.138067 |
| C | -3.690748 | 2.327342  | -0.959874 | H                   | 6.016588     | 2.740064  | -1.333225 |
| C | -4.091997 | 2.000691  | -2.247901 | C                   | -0.608288    | -0.465016 | -2.348271 |
| H | -4.357709 | 2.790496  | -2.944531 | N                   | -0.814996    | -1.668754 | -1.734486 |
| C | 1.934008  | -3.004908 | 0.439231  | C                   | -0.940194    | -2.760823 | -2.463976 |
| C | 2.800490  | -2.134112 | 1.394612  | C                   | -0.850199    | -2.789932 | -3.871980 |
| H | 2.353014  | -4.019805 | 0.503589  | C                   | -0.628099    | -1.590273 | -4.507926 |
| C | 2.064670  | -2.518899 | -0.991318 | C                   | -0.508989    | -0.397249 | -3.767178 |
| C | 4.192244  | -1.885711 | 0.853270  | C                   | -0.298779    | 0.862661  | -4.374279 |
| H | 2.897524  | -2.719818 | 2.314821  | C                   | -0.315083    | 1.929404  | -2.193718 |
| H | 1.428458  | -3.128035 | -1.640215 | C                   | -0.498875    | 0.704934  | -1.578617 |
| H | 1.704803  | -1.487550 | -1.072651 | H                   | -0.558287    | 0.613619  | -0.498646 |
| C | 3.504938  | -2.603433 | -1.479613 | C                   | -0.217225    | 3.187148  | -1.445521 |
| C | 4.519913  | -2.095368 | -0.489300 | C                   | -0.501964    | 3.343311  | -0.091670 |
| H | 3.745895  | -3.649914 | -1.719088 | C                   | -0.709791    | 4.699606  | 0.461205  |
| H | 3.604833  | -2.037554 | -2.413270 | O                   | -0.700653    | 5.738659  | -0.158919 |
| C | 5.832997  | -1.857971 | -0.911019 | O                   | -0.928466    | 4.623275  | 1.788990  |
| C | 6.476633  | -1.196731 | 1.309426  | C                   | -1.103380    | 5.878080  | 2.457456  |
| C | 2.096999  | -0.851244 | 1.763505  | C                   | -1.334003    | 5.579315  | 3.918918  |
| C | 6.807930  | -1.418795 | -0.027531 | H                   | -1.474306    | 6.511897  | 4.474524  |
| H | 6.083650  | -2.018055 | -1.957656 | H                   | -0.477184    | 5.049675  | 4.347327  |
| H | 7.227969  | -0.847030 | 2.012033  | H                   | -2.226909    | 4.960511  | 4.054305  |
| C | 2.099424  | 0.249798  | 0.909200  | H                   | -1.949564    | 6.405255  | 2.004580  |
| C | 1.383464  | -0.733812 | 2.956031  | H                   | -0.209911    | 6.490232  | 2.296739  |
| H | 7.820104  | -1.238174 | -0.379225 | H                   | -0.902584    | 2.526869  | 0.500499  |
| N | 1.428488  | 1.377782  | 1.172381  | H                   | -0.168689    | 4.093700  | -2.043380 |
| H | 2.645347  | 0.240856  | -0.029219 | H                   | -0.209533    | 0.916722  | -5.455682 |
| H | 1.366612  | -1.568543 | 3.652998  | H                   | -0.544771    | -1.549372 | -5.592089 |
| C | 0.739944  | 1.477852  | 2.317202  | H                   | -1.112604    | -3.681132 | -1.912725 |
| H | 0.215294  | 2.413404  | 2.487200  | C                   | -0.207464    | 1.991435  | -3.607626 |
| H | -4.474071 | 0.446462  | -3.677089 | H                   | -0.040917    | 2.957700  | -4.074951 |
| H | -3.623099 | 3.364510  | -0.648036 | C                   | -0.997535    | -4.092865 | -4.598599 |
| O | -3.870923 | -1.667305 | -2.079990 | H                   | -0.906804    | -3.953727 | -5.679284 |
| O | -2.808177 | 1.555601  | 1.153008  | H                   | -0.230720    | -4.810903 | -4.285649 |
| C | -4.328831 | -2.021114 | -3.361402 | H                   | -1.972735    | -4.551727 | -4.397192 |
| H | -3.672163 | -1.627825 | -4.148624 | 99                  |              |           |           |
| H | -4.314993 | -3.112242 | -3.394461 | cis-T25_C7_TSI Eopt | -2806.642501 |           |           |
| H | -5.353961 | -1.668738 | -3.534876 | Pd                  | -2.339424    | -0.141181 | -0.286027 |
| C | -3.573947 | 2.404039  | 1.990897  | C                   | -3.504685    | 1.152959  | -2.524323 |

C -3.298408 -1.182842 -2.725912  
 C -4.102556 1.242342 -3.774216  
 C -3.886573 -1.161837 -3.982561  
 H -4.392023 2.220964 -4.141362  
 H -4.004479 -2.099758 -4.514521  
 N -3.133295 -0.038649 -2.063796  
 H -4.759122 0.110714 -5.482975  
 C -4.293950 0.067326 -4.502213  
 N -2.338816 -2.110947 -0.766584  
 N -2.578664 1.948115 -0.471710  
 C -2.780502 -2.408744 -2.017034  
 C -3.149273 2.313245 -1.637839  
 O -2.798303 -3.499545 -2.570165  
 O -3.333400 3.464860 -2.053488  
 C -1.637743 -3.068274 -0.027767  
 C -2.148376 -3.539233 1.191481  
 C -0.351772 -3.471615 -0.430071  
 C -1.393509 -4.397958 1.992641  
 C 0.404468 -4.337196 0.362212  
 C -0.127523 -4.785404 1.564558  
 H 0.464067 -5.447835 2.189945  
 C -0.307124 -0.566058 1.930503  
 C -2.508382 -0.331543 2.632847  
 C 0.610425 -0.798462 0.887627  
 C 0.153248 -0.487006 3.273312  
 C -2.150500 -0.315654 4.000839  
 H -3.549840 -0.238349 2.339640  
 C 1.969759 -0.882794 1.142032  
 H 0.222425 -0.922311 -0.119696  
 C 1.546633 -0.545800 3.522265  
 C -0.808507 -0.360034 4.299334  
 H -0.474268 -0.306255 5.333358  
 N -1.637372 -0.417280 1.649714  
 H 1.899139 -0.462052 4.547171  
 H 2.650389 -1.841343 0.609188  
 Pd 3.247851 -0.108752 -0.426887  
 C 5.773810 0.336057 -1.610963  
 O 6.687329 0.767084 -2.282939  
 O 4.522485 0.700344 -1.748908  
 N 4.818485 -1.250967 -0.003365  
 C 4.637903 -2.514702 0.310505  
 C 5.802524 -3.469058 0.378461  
 H 5.481840 -4.380128 0.884441  
 H 6.654445 -3.032089 0.906911  
 H 6.134294 -3.729220 -0.633535  
 O 3.479674 -2.975147 0.566421  
 C 6.056096 -0.688051 -0.498270  
 H 6.731343 -1.448249 -0.903452  
 C -2.066208 3.067018 0.300736  
 C -0.824414 3.732002 -0.378257  
 H -2.840763 3.847886 0.311154  
 C -1.772341 2.691956 1.739200  
 C 0.026453 4.560321 0.568481

H -1.244035 4.408152 -1.131362  
 H -2.655838 2.206223 2.165670  
 H -0.947403 1.972052 1.781684  
 C -1.407094 3.926469 2.545301  
 C -0.238936 4.656197 1.939401  
 H -2.277012 4.598720 2.594132  
 H -1.173361 3.650155 3.580736  
 C 0.596093 5.439246 2.743513  
 C 1.941179 6.033130 0.843060  
 C 0.012347 2.734499 -1.145657  
 C 1.677384 6.125229 2.208972  
 H 0.387916 5.501777 3.809819  
 H 2.785418 6.560803 0.408559  
 C 1.002396 1.965785 -0.538603  
 C -0.194313 2.547665 -2.513601  
 H 2.315931 6.724156 2.852429  
 N 1.739887 1.074917 -1.213989  
 H 1.226054 2.070265 0.517619  
 H -0.966695 3.125596 -3.014487  
 C 1.545943 0.914212 -2.530641  
 H 2.205134 0.212485 -3.028352  
 C 2.423644 -0.726100 2.485332  
 H 3.489816 -0.799803 2.681314  
 H -1.779605 -4.768674 2.934859  
 H 1.412868 -4.613667 0.080116  
 O -3.385767 -3.084329 1.520546  
 O 0.090898 -2.908100 -1.577847  
 C -3.931975 -3.527243 2.736171  
 H -3.314495 -3.220416 3.592977  
 H -4.916659 -3.061401 2.812647  
 H -4.049333 -4.618518 2.755613  
 C 1.321338 -3.361934 -2.102077  
 H 1.463486 -2.816082 -3.036434  
 H 2.154679 -3.151879 -1.421673  
 H 1.284040 -4.437953 -2.312930  
 C 1.119932 5.256801 0.038309  
 H 1.328807 5.177381 -1.026292  
 C 0.577145 1.630488 -3.213993  
 H 0.442670 1.474476 -4.279052  
 H 6.595184 -0.160853 0.301357  
 C -3.221565 -0.205089 5.043707  
 H -3.916983 -1.050676 4.988270  
 H -2.793430 -0.185755 6.049447  
 H -3.812109 0.708849 4.909473  
 107  
 cis-T25\_C7\_TSII Eopt -2944.282757  
 Pd -2.607653 -0.421970 -0.155828  
 C -3.977312 0.328110 -2.527570  
 C -3.572346 -1.976255 -2.307674  
 C -4.644781 0.130747 -3.728991  
 C -4.225862 -2.242680 -3.502250  
 H -5.040685 0.996976 -4.247778  
 H -4.287400 -3.271864 -3.839122

|   |           |           |           |    |           |           |                                  |
|---|-----------|-----------|-----------|----|-----------|-----------|----------------------------------|
| N | -3.470171 | -0.718404 | -1.881776 | C  | 1.125853  | 0.438160  | -2.523619                        |
| H | -5.284592 | -1.352478 | -5.151380 | H  | 1.806181  | -0.349805 | -2.835069                        |
| C | -4.767219 | -1.171667 | -4.213429 | C  | 2.105708  | 0.522055  | 2.604267                         |
| N | -2.421317 | -2.441784 | -0.283796 | H  | 3.159573  | 0.725196  | 2.778214                         |
| N | -3.059262 | 1.576846  | -0.710677 | H  | -1.142645 | -4.433335 | 3.658956                         |
| C | -2.908916 | -2.999059 | -1.426851 | H  | 1.543615  | -4.668109 | 0.323047                         |
| C | -3.699095 | 1.660336  | -1.895076 | O  | -3.050583 | -3.073776 | 2.272996                         |
| O | -2.854978 | -4.171485 | -1.771243 | O  | -0.055724 | -3.170769 | -1.291242                        |
| O | -4.005138 | 2.689467  | -2.511793 | C  | -3.363395 | -3.295058 | 3.624555                         |
| C | -1.542457 | -3.196935 | 0.496773  | H  | -2.648711 | -2.793013 | 4.292211                         |
| C | -1.840015 | -3.499769 | 1.833148  | H  | -4.358984 | -2.872740 | 3.776476                         |
| C | -0.298741 | -3.592645 | -0.034192 | H  | -3.390104 | -4.365393 | 3.866873                         |
| C | -0.920949 | -4.194437 | 2.625588  | C  | 1.149484  | -3.568483 | -1.914733                        |
| C | 0.603760  | -4.324954 | 0.741501  | H  | 1.105072  | -3.175083 | -2.929888                        |
| C | 0.280822  | -4.610826 | 2.064648  | H  | 2.027843  | -3.132604 | -1.427018                        |
| H | 0.983440  | -5.173360 | 2.673141  | H  | 1.232636  | -4.661385 | -1.948938                        |
| C | -0.579481 | -0.062562 | 2.098952  | C  | 0.294074  | 5.266104  | -1.015680                        |
| C | -2.816213 | 0.006537  | 2.717056  | H  | 0.500104  | 4.982517  | -2.045503                        |
| C | 0.410735  | -0.503332 | 1.200153  | C  | 0.070875  | 0.866694  | -3.314909                        |
| C | -0.204956 | 0.563404  | 3.321056  | H  | -0.091130 | 0.413488  | -4.287488                        |
| C | -2.526988 | 0.507346  | 4.005409  | Pd | 2.913408  | -0.042261 | -0.267072                        |
| H | -3.845705 | -0.168409 | 2.417876  | C  | 3.011330  | -1.719638 | 1.320730                         |
| C | 1.743393  | -0.232171 | 1.450312  | C  | 4.177866  | -1.464742 | 0.532503                         |
| H | 0.100700  | -1.045103 | 0.311855  | H  | 3.143063  | -1.652826 | 2.396634                         |
| C | 1.159840  | 0.887525  | 3.524806  | H  | 2.340873  | -2.514516 | 1.006268                         |
| C | -1.214790 | 0.833373  | 4.267274  | H  | 4.381279  | -2.069426 | -0.348451                        |
| H | -0.942280 | 1.295505  | 5.213992  | C  | 5.320777  | -0.779398 | 1.166659                         |
| N | -1.902320 | -0.226127 | 1.795909  | O  | 5.292013  | -0.227478 | 2.252477                         |
| H | 1.445510  | 1.410783  | 4.433888  | O  | 6.399869  | -0.814715 | 0.378948                         |
| C | -2.636844 | 2.871595  | -0.200353 | C  | 7.526113  | -0.054607 | 0.828647                         |
| C | -1.465270 | 3.483630  | -1.036972 | C  | 8.536335  | -0.048363 | -0.292973                        |
| H | -3.477485 | 3.568012  | -0.333915 | H  | 7.923517  | -0.513099 | 1.741032                         |
| C | -2.299364 | 2.837495  | 1.275072  | H  | 7.189799  | 0.955144  | 1.084482                         |
| C | -0.709057 | 4.584307  | -0.315191 | H  | 9.423518  | 0.520467  | 0.003661                         |
| H | -1.950585 | 3.929411  | -1.912695 | H  | 8.847100  | -1.067176 | -0.544597                        |
| H | -3.129683 | 2.375965  | 1.817961  | H  | 8.109617  | 0.415134  | -1.187908                        |
| H | -1.408345 | 2.224357  | 1.444233  | C  | 4.376756  | -0.601682 | -2.643911                        |
| C | -2.048328 | 4.241811  | 1.796020  | O  | 3.705395  | -1.641986 | -2.656520                        |
| C | -0.971584 | 4.942242  | 1.012195  | O  | 4.228578  | 0.369678  | -1.810214                        |
| H | -2.981198 | 4.822859  | 1.738356  | C  | 5.498855  | -0.389496 | -3.641013                        |
| H | -1.771555 | 4.209226  | 2.857101  | H  | 5.520990  | 0.647016  | -3.987632                        |
| C | -0.222400 | 5.964279  | 1.605110  | H  | 6.451974  | -0.590685 | -3.138254                        |
| C | 1.029499  | 6.280933  | -0.420913 | H  | 5.394133  | -1.074127 | -4.484803                        |
| C | -0.533385 | 2.423944  | -1.576373 | C  | -3.639946 | 0.722167  | 4.986187                         |
| C | 0.769911  | 6.633246  | 0.902923  | H  | -4.095229 | -0.230612 | 5.282038                         |
| H | -0.427034 | 6.230469  | 2.640309  | H  | -3.278136 | 1.216091  | 5.892062                         |
| H | 1.804167  | 6.793008  | -0.984746 | H  | -4.435482 | 1.342082  | 4.556779                         |
| C | 0.553370  | 1.937081  | -0.853160 |    |           |           | 107                              |
| C | -0.759720 | 1.871006  | -2.838410 |    |           |           | cis-T25_C7_TSIIIopt -2944.297196 |
| H | 1.342551  | 7.421331  | 1.384176  | Pd | -2.463868 | 0.155078  | 0.050954                         |
| N | 1.358168  | 0.973016  | -1.315580 | C  | -3.966821 | 1.891652  | -1.595878                        |
| H | 0.795524  | 2.334878  | 0.127787  | C  | -3.932103 | -0.345301 | -2.317244                        |
| H | -1.597316 | 2.231299  | -3.430472 | C  | -4.841676 | 2.243045  | -2.614890                        |

C -4.797509 -0.058859 -3.364121  
H -5.165639 3.275816 -2.684837  
H -5.091830 -0.865909 -4.026339  
N -3.541101 0.633444 -1.504509  
H -5.934215 1.501962 -4.315219  
C -5.252745 1.251840 -3.506961  
N -2.680774 -1.696064 -0.819907  
N -2.508304 2.237694 0.261888  
C -3.371725 -1.701950 -1.991970  
C -3.333221 2.843618 -0.619525  
O -3.576193 -2.648251 -2.742162  
O -3.521453 4.056619 -0.764125  
C -1.953685 -2.843280 -0.490086  
C -2.236435 -3.557715 0.685484  
C -0.884298 -3.270683 -1.299988  
C -1.462751 -4.661127 1.053531  
C -0.132878 -4.395842 -0.955624  
C -0.424593 -5.069860 0.224893  
H 0.167565 -5.937204 0.502641  
C -1.552346 3.134020 0.901495  
C -0.624863 3.800922 -0.161323  
H -2.104630 3.960524 1.372208  
C -0.731607 2.429076 1.965587  
C 0.548627 4.533184 0.454620  
H -1.250920 4.532510 -0.682089  
H -1.406556 1.968164 2.692489  
H -0.154312 1.614495 1.514034  
C 0.206878 3.385693 2.688374  
C 0.954929 4.319672 1.774622  
H -0.370328 3.988677 3.405317  
H 0.930525 2.807499 3.274252  
C 2.066152 5.016695 2.262144  
C 2.360961 6.121178 0.146502  
C -0.167249 2.797109 -1.191583  
C 2.764767 5.911903 1.465543  
H 2.386393 4.839409 3.286599  
H 2.900236 6.816548 -0.490782  
C 0.877027 1.919222 -0.913622  
C -0.798163 2.668284 -2.428370  
H 3.627056 6.438613 1.865463  
N 1.241652 0.938157 -1.749909  
H 1.439102 1.978641 0.014091  
H -1.606650 3.346866 -2.689247  
C 0.608904 0.797610 -2.921293  
H 0.933879 -0.023916 -3.548540  
H -1.670684 -5.208617 1.964989  
H 0.676956 -4.739106 -1.589784  
O -3.282673 -3.093056 1.412022  
O -0.631825 -2.501886 -2.384697  
C -3.643811 -3.812963 2.564431  
H -2.835575 -3.821797 3.307305  
H -4.508477 -3.294530 2.983209  
H -3.924704 -4.846218 2.322230

C 0.239689 -3.020002 -3.363619  
H 1.277034 -3.068366 -3.004913  
H -0.082760 -4.014831 -3.693084  
H 0.187205 -2.329480 -4.207191  
C 1.262737 5.432252 -0.346509  
H 0.943370 5.584611 -1.375566  
C -0.404773 1.661948 -3.304441  
H -0.888764 1.532600 -4.267056  
Pd 2.634655 -0.388996 -0.912291  
H 1.648155 -1.574749 -1.254428  
C 3.829814 1.669780 0.602693  
O 2.976316 1.303267 1.425094  
O 3.980060 1.170590 -0.576224  
C 4.765276 2.818018 0.919896  
H 4.826628 2.967157 1.999799  
H 5.757552 2.642206 0.496763  
H 4.360429 3.731712 0.470810  
C -0.616789 -1.199208 2.118904  
N -1.763680 -0.492458 1.907704  
C -2.614229 -0.321208 2.902157  
C -2.415776 -0.822302 4.206693  
C -1.265817 -1.543895 4.434549  
C -0.336649 -1.757653 3.395621  
C 0.859969 -2.494709 3.560417  
C 1.451958 -2.083780 1.243513  
C 0.293822 -1.365778 1.062246  
H 0.070580 -0.896082 0.109130  
C 2.433607 -2.281095 0.140546  
C 3.745621 -1.760213 0.229293  
C 4.784384 -2.346243 -0.646769  
O 4.573284 -3.164352 -1.520387  
O 5.991857 -1.847470 -0.363269  
C 7.053017 -2.273861 -1.225107  
C 8.297355 -1.529138 -0.806654  
H 9.139534 -1.820772 -1.442566  
H 8.555362 -1.753369 0.233024  
H 8.148580 -0.449128 -0.900078  
H 6.772596 -2.057015 -2.261051  
H 7.169801 -3.359413 -1.135008  
H 4.058149 -1.180902 1.093407  
H 2.316647 -3.188588 -0.452375  
H 1.084390 -2.922509 4.533788  
H -1.063391 -1.957254 5.420671  
H -3.508261 0.250432 2.667985  
C 1.726571 -2.658178 2.510676  
H 2.645793 -3.221154 2.644049  
C -3.446253 -0.564132 5.265086  
H -3.151812 -1.010520 6.218833  
H -3.590286 0.510428 5.426002  
H -4.419244 -0.982833 4.982049  
99  
cis-T25\_IN1 Eopt -2806.650932  
Pd -2.415971 0.701641 0.032065

|    |           |           |           |                |           |              |           |
|----|-----------|-----------|-----------|----------------|-----------|--------------|-----------|
| C  | -3.393623 | 2.786405  | -1.626916 | H              | -0.989095 | 2.227168     | 2.553634  |
| C  | -4.392822 | 0.688002  | -1.986678 | H              | 0.351698  | 1.589313     | 1.607889  |
| C  | -4.188635 | 3.372078  | -2.602808 | C              | 0.839645  | 3.340732     | 2.787909  |
| C  | -5.215474 | 1.210101  | -2.974870 | C              | 1.917319  | 4.013915     | 1.975837  |
| H  | -4.064399 | 4.430188  | -2.805889 | H              | 0.271787  | 4.116605     | 3.323023  |
| H  | -5.910133 | 0.543294  | -3.474265 | H              | 1.299209  | 2.713904     | 3.562154  |
| N  | -3.526613 | 1.488612  | -1.367421 | C              | 3.065685  | 4.497068     | 2.613347  |
| H  | -5.741656 | 3.001270  | -4.046053 | C              | 3.920414  | 5.345675     | 0.532244  |
| C  | -5.107558 | 2.567663  | -3.277901 | C              | 0.997691  | 2.471566     | -1.034374 |
| N  | -3.503860 | -0.930368 | -0.503813 | C              | 4.061941  | 5.155065     | 1.906375  |
| N  | -1.692182 | 2.677110  | 0.044984  | H              | 3.173110  | 4.346405     | 3.685665  |
| C  | -4.371022 | -0.748905 | -1.531784 | H              | 4.690935  | 5.861663     | -0.033632 |
| C  | -2.323486 | 3.482841  | -0.835117 | C              | 2.024153  | 1.606084     | -0.664581 |
| O  | -5.087788 | -1.581391 | -2.071588 | C              | 0.340123  | 2.197955     | -2.236864 |
| O  | -2.079382 | 4.672131  | -1.072313 | H              | 4.947374  | 5.516411     | 2.421974  |
| C  | -3.265702 | -2.220524 | -0.019986 | N              | 2.383584  | 0.546972     | -1.400061 |
| C  | -3.723411 | -2.597550 | 1.251337  | H              | 2.596021  | 1.771965     | 0.244080  |
| C  | -2.479141 | -3.122384 | -0.756954 | H              | -0.443214 | 2.867742     | -2.579503 |
| C  | -3.391408 | -3.843681 | 1.787683  | C              | 1.744239  | 0.285038     | -2.548770 |
| C  | -2.149357 | -4.372109 | -0.228177 | H              | 2.086568  | -0.592614    | -3.089060 |
| C  | -2.606978 | -4.713526 | 1.038563  | C              | 1.509064  | -3.146212    | 0.765689  |
| H  | -2.346811 | -5.683765 | 1.452369  | H              | 2.285993  | -3.868575    | 0.534683  |
| C  | -0.471148 | -1.243444 | 1.300080  | H              | -3.740072 | -4.141696    | 2.769317  |
| C  | -1.940216 | -0.213913 | 2.779064  | H              | -1.534006 | -5.067983    | -0.785666 |
| C  | 0.056332  | -1.365915 | -0.001112 | O              | -4.471805 | -1.668291    | 1.900293  |
| C  | 0.006486  | -2.091115 | 2.338759  | O              | -2.059061 | -2.670437    | -1.959486 |
| C  | -1.511524 | -0.992731 | 3.874387  | C              | -5.044144 | -2.045816    | 3.126799  |
| H  | -2.724995 | 0.524837  | 2.910673  | H              | -4.277803 | -2.277585    | 3.879375  |
| H  | -0.334832 | -0.722523 | -0.784206 | H              | -5.632290 | -1.189222    | 3.461943  |
| C  | 1.008890  | -3.044648 | 2.039027  | H              | -5.704487 | -2.915133    | 3.012476  |
| C  | -0.542595 | -1.938648 | 3.628550  | C              | -1.308108 | -3.550534    | -2.761927 |
| H  | -0.185159 | -2.579327 | 4.432305  | H              | -1.090783 | -3.006157    | -3.682223 |
| N  | -1.446912 | -0.322061 | 1.560140  | H              | -0.364029 | -3.832628    | -2.278468 |
| H  | 1.373726  | -3.686811 | 2.836336  | H              | -1.878259 | -4.456515    | -3.002924 |
| Pd | 3.843739  | -0.756714 | -0.731491 | C              | 2.787484  | 4.867298     | -0.109616 |
| C  | 4.445974  | -3.142616 | -2.094908 | H              | 2.672846  | 5.003556     | -1.183042 |
| O  | 4.423426  | -4.094272 | -2.844262 | C              | 0.712055  | 1.095196     | -2.997324 |
| O  | 3.549742  | -2.171731 | -2.134038 | H              | 0.215180  | 0.865298     | -3.934074 |
| N  | 5.214732  | -1.966450 | -0.113270 | H              | 6.505002  | -2.798966    | -1.577014 |
| C  | 5.888173  | -1.132183 | 0.660695  | C              | 1.024732  | -2.304893    | -0.261152 |
| C  | 7.267990  | -1.393776 | 1.172906  | H              | 1.444396  | -2.403248    | -1.257196 |
| H  | 7.993738  | -0.855961 | 0.551842  | C              | -2.089531 | -0.749173    | 5.237303  |
| H  | 7.509788  | -2.459933 | 1.147963  | H              | -1.978425 | -1.628949    | 5.877913  |
| H  | 7.357494  | -1.015236 | 2.194186  | H              | -1.583577 | 0.087962     | 5.734192  |
| O  | 5.263105  | -0.056928 | 0.932811  | H              | -3.153850 | -0.498393    | 5.183421  |
| C  | 5.569255  | -3.007775 | -1.038051 | 98             |           |              |           |
| H  | 5.683803  | -3.979185 | -0.542143 | cis-T25_T-Pd-P | Eopt      | -2588.707048 |           |
| C  | -0.600514 | 3.319393  | 0.751637  | Pd             | 1.410578  | -1.306578    | 0.217285  |
| C  | 0.600318  | 3.649982  | -0.179636 | N              | 2.061157  | -1.958277    | 1.938347  |
| H  | -0.956925 | 4.298131  | 1.108188  | C              | 3.209858  | -1.467838    | 2.397896  |
| C  | -0.125831 | 2.517233  | 1.947249  | C              | 3.745972  | -1.974130    | 3.574049  |
| C  | 1.780464  | 4.197658  | 0.594936  | C              | 3.058675  | -2.996437    | 4.229176  |
| H  | 0.234457  | 4.429457  | -0.857097 | C              | 1.862544  | -3.489612    | 3.707997  |

|   |           |           |           |                      |              |           |           |
|---|-----------|-----------|-----------|----------------------|--------------|-----------|-----------|
| C | 1.382762  | -2.941081 | 2.526773  | H                    | 3.577131     | 2.400823  | 1.641514  |
| C | 0.107975  | -3.334320 | 1.832993  | H                    | 3.020359     | 2.813898  | -3.152832 |
| O | -0.652825 | -4.140050 | 2.353809  | H                    | 4.551550     | 2.446924  | -2.376943 |
| N | -0.038168 | -2.696245 | 0.639710  | H                    | 3.162190     | 0.499992  | -2.124966 |
| C | -1.292612 | -2.748040 | 0.025413  | H                    | 1.792288     | 1.441522  | -1.534284 |
| C | -2.413261 | -2.178238 | 0.660578  | H                    | 4.498710     | 1.304358  | -0.144567 |
| C | -3.662748 | -2.177923 | 0.039593  | N                    | 0.847064     | -0.960842 | -1.757763 |
| C | -3.781171 | -2.710579 | -1.238760 | C                    | 1.642698     | -1.476500 | -2.674797 |
| C | -2.688430 | -3.259536 | -1.900434 | C                    | 1.384954     | -1.430078 | -4.061551 |
| C | -1.446884 | -3.289938 | -1.259826 | C                    | 0.217673     | -0.820007 | -4.463782 |
| O | -0.323587 | -3.815970 | -1.810255 | C                    | -0.673454    | -0.283760 | -3.513279 |
| C | -0.438442 | -4.404083 | -3.081025 | C                    | -1.910341    | 0.315839  | -3.860953 |
| H | -1.149252 | -5.240787 | -3.076842 | C                    | -2.757838    | 0.776611  | -2.891352 |
| H | -0.745925 | -3.672762 | -3.840598 | C                    | -2.412220    | 0.685620  | -1.514985 |
| H | 0.555919  | -4.781300 | -3.328637 | C                    | -1.194276    | 0.138192  | -1.159652 |
| H | -2.812371 | -3.668208 | -2.896278 | C                    | -0.321791    | -0.367851 | -2.137960 |
| H | -4.747945 | -2.694502 | -1.734080 | H                    | -0.902473    | 0.070801  | -0.115523 |
| H | -4.522877 | -1.734814 | 0.527844  | C                    | -3.298338    | 1.106500  | -0.443026 |
| O | -2.165215 | -1.600661 | 1.856438  | C                    | -4.492249    | 1.709345  | -0.544721 |
| C | -3.268697 | -1.268618 | 2.674197  | C                    | -5.231909    | 2.028486  | 0.684616  |
| H | -3.919534 | -2.138885 | 2.821784  | O                    | -4.893657    | 1.733009  | 1.816233  |
| H | -3.849528 | -0.431817 | 2.267869  | O                    | -6.361392    | 2.699174  | 0.409625  |
| H | -2.843967 | -0.969745 | 3.634128  | C                    | -7.150011    | 3.065280  | 1.547524  |
| H | 1.288344  | -4.278552 | 4.181600  | C                    | -8.358963    | 3.812408  | 1.038475  |
| H | 3.456485  | -3.409018 | 5.152078  | H                    | -8.992884    | 4.113385  | 1.878712  |
| H | 4.673563  | -1.550497 | 3.943355  | H                    | -8.058938    | 4.712380  | 0.492976  |
| C | 3.764040  | -0.316827 | 1.607445  | H                    | -8.951861    | 3.183732  | 0.366918  |
| O | 4.723819  | 0.314267  | 2.063231  | H                    | -6.539012    | 3.677498  | 2.219113  |
| N | 3.062487  | -0.048125 | 0.484277  | H                    | -7.425953    | 2.157338  | 2.094543  |
| C | 3.401516  | 1.228423  | -0.119927 | H                    | -4.948756    | 1.996543  | -1.486516 |
| C | 2.887526  | 1.381572  | -1.537619 | H                    | -2.941071    | 0.891957  | 0.558630  |
| C | 3.484621  | 2.627302  | -2.176230 | H                    | -3.712229    | 1.210061  | -3.173448 |
| C | 3.357241  | 3.855694  | -1.311832 | H                    | -2.179797    | 0.386412  | -4.911436 |
| C | 3.126438  | 3.752824  | 0.064750  | H                    | -0.032842    | -0.756869 | -5.520925 |
| C | 3.048614  | 4.921492  | 0.831180  | H                    | 2.546887     | -1.951790 | -2.304833 |
| C | 3.195103  | 6.174615  | 0.254986  | C                    | 2.365217     | -2.039226 | -5.018459 |
| C | 3.421217  | 6.277360  | -1.117314 | H                    | 2.030856     | -1.923307 | -6.053043 |
| C | 3.499491  | 5.124492  | -1.885315 | H                    | 3.352252     | -1.571050 | -4.928190 |
| H | 3.674061  | 5.199071  | -2.957107 | H                    | 2.495639     | -3.110207 | -4.823327 |
| H | 3.532531  | 7.252289  | -1.584245 | 85                   |              |           |           |
| H | 3.131067  | 7.068088  | 0.869952  | cis-T25_T-Pd-SM Eopt | -2244.487608 |           |           |
| H | 2.860388  | 4.832909  | 1.899021  | Pd                   | 0.511936     | 0.824649  | -0.647903 |
| C | 2.926720  | 2.420931  | 0.759183  | C                    | -0.301910    | 3.439623  | -1.367736 |
| C | 1.508352  | 2.256430  | 1.258533  | C                    | 1.942773     | 3.259869  | -0.677353 |
| C | 0.399433  | 2.751683  | 0.566084  | C                    | -0.158261    | 4.801455  | -1.597552 |
| N | -0.864466 | 2.625515  | 0.974336  | C                    | 2.151392     | 4.615736  | -0.886516 |
| C | -1.082239 | 1.982260  | 2.123073  | H                    | -1.019833    | 5.362736  | -1.942417 |
| C | -0.059534 | 1.444418  | 2.898980  | H                    | 3.130307     | 5.028827  | -0.668266 |
| C | 1.250246  | 1.592471  | 2.460513  | N                    | 0.741965     | 2.739985  | -0.929775 |
| H | 2.079623  | 1.211896  | 3.051916  | H                    | 1.225321     | 6.448277  | -1.531731 |
| H | -0.286065 | 0.928613  | 3.827390  | C                    | 1.086723     | 5.384731  | -1.358757 |
| H | -2.123016 | 1.900550  | 2.435566  | N                    | 2.467507     | 1.020844  | -0.108202 |
| H | 0.545332  | 3.299543  | -0.363619 | N                    | -1.426301    | 1.337831  | -1.218655 |

|   |           |           |           |    |           |           |                                   |
|---|-----------|-----------|-----------|----|-----------|-----------|-----------------------------------|
| C | 2.957094  | 2.286035  | -0.129155 | O  | 3.586737  | -0.948534 | -1.554918                         |
| C | -1.581774 | 2.655839  | -1.480843 | O  | 2.667343  | 0.994456  | 2.577306                          |
| O | 4.059479  | 2.677141  | 0.232915  | C  | 4.059442  | -2.012479 | -2.344822                         |
| O | -2.632450 | 3.252923  | -1.734199 | H  | 3.528435  | -2.947070 | -2.120766                         |
| C | 3.177317  | 0.002415  | 0.531377  | H  | 3.859328  | -1.729483 | -3.378892                         |
| C | 3.705396  | -1.065470 | -0.212639 | H  | 5.138632  | -2.163381 | -2.210833                         |
| C | 3.247248  | -0.046644 | 1.934042  | C  | 2.780086  | 1.037604  | 3.977270                          |
| C | 4.284341  | -2.163219 | 0.430113  | H  | 2.296264  | 1.964194  | 4.291048                          |
| C | 3.844328  | -1.132347 | 2.581388  | H  | 2.272229  | 0.186326  | 4.452130                          |
| C | 4.350920  | -2.179062 | 1.818321  | H  | 3.829878  | 1.054075  | 4.296272                          |
| H | 4.811771  | -3.026240 | 2.318631  | C  | -5.658972 | 0.397019  | 1.211573                          |
| C | 0.630754  | -2.134259 | -1.324671 | H  | -5.480408 | 1.267923  | 1.838827                          |
| C | 0.514489  | -1.614006 | 0.938110  | C  | -0.850879 | 1.378812  | 2.970631                          |
| C | 0.642483  | -1.711415 | -2.671284 | H  | -0.168432 | 2.140095  | 3.334647                          |
| C | 0.756550  | -3.514903 | -1.016088 | C  | 0.763658  | -2.636980 | -3.679275                         |
| C | 0.633411  | -2.964342 | 1.340186  | H  | 0.769928  | -2.307734 | -4.714208                         |
| H | 0.432196  | -0.831295 | 1.684587  | C  | 0.628780  | -3.292180 | 2.800191                          |
| H | 0.560795  | -0.647538 | -2.876186 | H  | -0.261851 | -2.870364 | 3.281479                          |
| C | 0.883977  | -4.442760 | -2.078809 | H  | 0.646002  | -4.373354 | 2.963877                          |
| C | 0.751601  | -3.902209 | 0.343809  | H  | 1.511296  | -2.857460 | 3.284700                          |
| H | 0.846789  | -4.957261 | 0.592324  |    |           |           | 80                                |
| N | 0.499252  | -1.217980 | -0.319245 |    |           |           | cis-T25_TC-Pd-P Eopt -3264.861611 |
| H | 0.978016  | -5.499139 | -1.840436 | Pd | 0.538156  | 1.390687  | -0.510666                         |
| C | -2.671418 | 0.602005  | -1.141576 | C  | 1.538514  | 4.027629  | -0.299530                         |
| C | -3.406405 | 0.842983  | 0.204560  | C  | -0.695798 | 3.889343  | -1.021399                         |
| H | -3.341677 | 1.011756  | -1.910989 | C  | 1.515420  | 5.412977  | -0.378709                         |
| C | -2.521978 | -0.887166 | -1.385967 | C  | -0.790229 | 5.271301  | -1.108440                         |
| C | -4.682505 | 0.030172  | 0.279007  | H  | 2.414156  | 5.963086  | -0.121837                         |
| H | -3.677468 | 1.906296  | 0.202722  | H  | -1.730495 | 5.708538  | -1.426337                         |
| H | -1.901430 | -1.060339 | -2.270409 | N  | 0.447079  | 3.335820  | -0.621612                         |
| H | -2.012820 | -1.356282 | -0.536321 | H  | 0.287106  | 7.115922  | -0.849468                         |
| C | -3.897452 | -1.510454 | -1.581806 | C  | 0.333026  | 6.032818  | -0.784527                         |
| C | -4.896795 | -1.092754 | -0.530549 | N  | -1.385173 | 1.621524  | -1.251985                         |
| H | -4.285556 | -1.213958 | -2.567701 | N  | 2.421071  | 1.869782  | 0.191555                          |
| H | -3.821635 | -2.604890 | -1.604033 | C  | -1.801310 | 2.918677  | -1.336861                         |
| C | -6.082406 | -1.820828 | -0.377917 | C  | 2.722966  | 3.199553  | 0.120067                          |
| C | -6.832659 | -0.329196 | 1.351925  | O  | -2.912477 | 3.334249  | -1.641252                         |
| C | -2.519616 | 0.610611  | 1.408601  | O  | 3.792207  | 3.742230  | 0.368645                          |
| C | -7.044864 | -1.450516 | 0.550746  | C  | -2.300575 | 0.582172  | -1.449412                         |
| H | -6.245154 | -2.694784 | -1.005894 | C  | -3.599180 | 0.608491  | -0.921357                         |
| H | -7.578149 | -0.025591 | 2.081697  | C  | -1.865153 | -0.574053 | -2.103614                         |
| C | -2.512338 | -0.592600 | 2.123670  | C  | -4.394411 | -0.528286 | -0.984733                         |
| C | -1.655402 | 1.611115  | 1.860991  | C  | -2.663214 | -1.708718 | -2.141884                         |
| H | -7.956839 | -2.032745 | 0.651768  | C  | -3.932317 | -1.702276 | -1.572357                         |
| N | -1.751465 | -0.833127 | 3.194832  | H  | -4.547641 | -2.596063 | -1.579871                         |
| H | -3.175926 | -1.400647 | 1.822310  | C  | -0.139320 | -1.450642 | 0.322138                          |
| H | -1.630549 | 2.571666  | 1.354263  | C  | 1.690079  | -1.239794 | -1.098936                         |
| C | -0.941105 | 0.144441  | 3.605787  | C  | -1.173552 | -0.853987 | 1.060669                          |
| H | -0.335815 | -0.072312 | 4.485135  | C  | 0.002379  | -2.865785 | 0.311088                          |
| C | 0.883933  | -4.013475 | -3.383328 | C  | 1.942194  | -2.626779 | -1.116214                         |
| H | 0.978595  | -4.731215 | -4.192924 | H  | 2.336497  | -0.566497 | -1.655035                         |
| H | 4.688040  | -2.992278 | -0.138715 | C  | -2.107429 | -1.628756 | 1.725139                          |
| H | 3.915332  | -1.168626 | 3.662394  | H  | -1.240418 | 0.228915  | 1.059679                          |



C -0.940079 -3.644266 1.024329  
 C 1.071334 -3.428425 -0.413981  
 H 1.204713 -4.507507 -0.406304  
 N 0.709940 -0.672229 -0.417684  
 H -0.840259 -4.725691 1.013565  
 H -3.969258 1.505846 -0.443105  
 H -0.872209 -0.587609 -2.536887  
 C -2.157992 -2.967841 -2.779613  
 C -5.764903 -0.536821 -0.371396  
 F -2.794675 -3.241735 -3.927882  
 F -0.843754 -2.902041 -3.057514  
 F -2.339959 -4.029078 -1.971778  
 F -6.055698 0.617876 0.247917  
 F -5.880728 -1.521625 0.537010  
 F -6.715956 -0.748587 -1.294642  
 C -1.969103 -3.043683 1.698394  
 H -2.703958 -3.648768 2.221961  
 C 3.416337 0.949136 0.532129  
 C 3.074892 -0.138141 1.346597  
 C 4.718545 1.020201 0.021982  
 C 3.984978 -1.157448 1.584528  
 H 2.075772 -0.188863 1.763481  
 C 5.631527 0.006078 0.296425  
 H 5.008934 1.864017 -0.590868  
 C 5.275576 -1.096750 1.064209  
 H 5.986498 -1.894950 1.248294  
 C 3.577491 -2.379187 2.351538  
 C 7.033906 0.122331 -0.228145  
 F 7.600754 -1.084925 -0.393954  
 F 7.068815 0.750946 -1.413542  
 F 7.818049 0.815130 0.610633  
 F 2.322239 -2.298568 2.814896  
 F 4.385619 -2.610602 3.395202  
 F 3.639758 -3.477618 1.566513  
 C -3.263602 -1.049557 2.398369  
 C -3.586496 0.250684 2.442171  
 H -3.962164 -1.743995 2.862062  
 H -2.980352 1.030990 1.992966  
 C -4.866790 0.665822 3.042486  
 O -5.644146 -0.060317 3.621871  
 O -5.077586 1.975771 2.834447  
 C -6.344122 2.449734 3.279442  
 H -6.356255 3.516464 3.055904  
 H -7.147132 1.936128 2.743551  
 H -6.466558 2.277644 4.352047  
 C 3.143620 -3.156179 -1.836196  
 H 3.343854 -2.595791 -2.754646  
 H 4.029180 -3.072940 -1.194535  
 H 3.016967 -4.210191 -2.097688  
 70  
 cis-T25\_TC-Pd-SM Eopt -2959.907072  
 Pd -0.119884 1.501679 0.058040  
 C -1.397245 4.010447 -0.206128

C 0.921531 4.131063 0.178189  
 C -1.497291 5.394209 -0.249850  
 C 0.892984 5.517677 0.130083  
 H -2.472226 5.840171 -0.413961  
 H 1.822039 6.061994 0.260350  
 N -0.209277 3.448536 0.007223  
 H -0.384761 7.231182 -0.118437  
 C -0.334372 6.146903 -0.082533  
 N 1.843158 1.962480 0.504547  
 N -2.125432 1.747047 -0.379445  
 C 2.149402 3.287279 0.399298  
 C -2.542756 3.047165 -0.370246  
 O 3.252475 3.812924 0.480872  
 O -3.684948 3.472490 -0.492078  
 C 2.858782 1.012016 0.645820  
 C 4.027973 1.037665 -0.120965  
 C 2.638641 -0.074047 1.500065  
 C 4.904971 -0.041558 -0.084385  
 C 3.515365 -1.148120 1.518110  
 C 4.653676 -1.149561 0.715943  
 H 5.331639 -1.995863 0.716255  
 C 0.766951 -1.306021 -0.677507  
 C -0.809705 -1.170141 1.029614  
 C 1.565708 -0.677228 -1.656555  
 C 0.831911 -2.717848 -0.517487  
 C -0.847072 -2.565090 1.221616  
 H -1.445199 -0.524153 1.629190  
 C 2.436669 -1.423115 -2.412050  
 H 1.494464 0.399784 -1.776026  
 C 1.731066 -3.458356 -1.321350  
 C -0.000276 -3.323139 0.446118  
 H 3.078901 -0.930249 -3.134538  
 H 0.030172 -4.403665 0.564228  
 N -0.047726 -0.565133 0.133994  
 H 1.784630 -4.534812 -1.185821  
 H 4.232272 1.888527 -0.759509  
 H 1.747009 -0.082547 2.115832  
 C 3.237027 -2.344819 2.377159  
 C 6.067623 -0.058681 -1.031311  
 F 4.187981 -2.527029 3.305305  
 F 2.060572 -2.249530 3.018170  
 F 3.196322 -3.472448 1.640244  
 F 6.596853 1.159395 -1.201818  
 F 5.685455 -0.492208 -2.252380  
 F 7.044933 -0.878298 -0.617404  
 C 2.525365 -2.822591 -2.241138  
 H 3.225757 -3.392001 -2.844294  
 C -3.062921 0.714098 -0.464952  
 C -2.733489 -0.431102 -1.201403  
 C -4.282072 0.737105 0.224598  
 C -3.562157 -1.543469 -1.190061  
 H -1.804538 -0.447559 -1.759030  
 C -5.118682 -0.374817 0.199977

H -4.567510 1.621523 0.779562  
 C -4.766190 -1.528814 -0.490395  
 H -5.413357 -2.399060 -0.480268  
 C -3.143783 -2.809993 -1.873588  
 C -6.440016 -0.311546 0.910666  
 F -6.856637 -1.531932 1.289465  
 F -6.374986 0.452678 2.012098  
 F -7.397098 0.206024 0.126119  
 F -2.007978 -2.666017 -2.570623  
 F -4.085536 -3.262857 -2.713164  
 F -2.930806 -3.792938 -0.970437  
 C -1.814314 -3.157352 2.199536  
 H -1.927379 -2.527871 3.087616  
 H -2.801294 -3.258203 1.732385  
 H -1.492685 -4.151138 2.522545  
 96  
 cis-T25-Q\_C3\_IN2 Eopt -2767.395330  
 Pd -2.345765 -0.097724 0.020312  
 C -4.281822 1.406856 -1.397805  
 C -4.423508 -0.926810 -1.693634  
 C -5.351292 1.614937 -2.258575  
 C -5.498763 -0.786269 -2.559218  
 H -5.662858 2.633453 -2.463135  
 H -5.924292 -1.678093 -3.006670  
 N -3.887048 0.162030 -1.142461  
 H -6.808701 0.636662 -3.503222  
 C -5.967667 0.500410 -2.829204  
 N -2.691762 -2.019301 -0.502718  
 N -2.495380 1.995156 0.073792  
 C -3.713917 -2.222355 -1.370041  
 C -3.459598 2.480799 -0.736170  
 O -4.064365 -3.270597 -1.894936  
 O -3.702817 3.668238 -0.981702  
 C -1.749602 -3.016389 -0.232482  
 C -1.787935 -3.723488 0.978907  
 C -0.642801 -3.179728 -1.082147  
 C -0.743156 -4.582530 1.332987  
 C 0.403501 -4.037255 -0.734921  
 C 0.337818 -4.726926 0.471982  
 H 1.155456 -5.386202 0.748000  
 C -1.737067 3.012305 0.775120  
 C -0.723313 3.762939 -0.134763  
 H -2.447158 3.789728 1.096591  
 C -1.048456 2.468252 2.012034  
 C 0.225987 4.642576 0.658658  
 H -1.336669 4.405105 -0.777007  
 H -1.758431 1.866330 2.588395  
 H -0.226815 1.803829 1.725320  
 C -0.508900 3.612258 2.854120  
 C 0.347742 4.557734 2.051374  
 H -1.352031 4.171762 3.286096  
 H 0.065997 3.222953 3.703276  
 C 1.272078 5.382835 2.702183

C 1.937888 6.367295 0.612562  
 C 0.039722 2.839276 -1.054596  
 C 2.062376 6.280564 1.998629  
 H 1.367389 5.310045 3.783761  
 H 2.549888 7.064565 0.047486  
 C 1.188369 2.168676 -0.640045  
 C -0.394907 2.605719 -2.360523  
 H 2.775554 6.908299 2.525760  
 N 1.860820 1.318744 -1.430220  
 H 1.578401 2.296900 0.363086  
 H -1.305268 3.086813 -2.709462  
 C 1.480448 1.159375 -2.706522  
 H 2.107256 0.512957 -3.310892  
 H -0.762365 -5.127698 2.269129  
 H 1.261674 -4.168924 -1.383317  
 O -2.865299 -3.476242 1.759230  
 O -0.652122 -2.408296 -2.198319  
 C -2.942451 -4.147683 2.993071  
 H -2.103902 -3.879988 3.649660  
 H -3.877391 -3.822215 3.452550  
 H -2.967918 -5.236724 2.858067  
 C 0.474890 -2.467989 -3.038690  
 H 0.277025 -1.771208 -3.854920  
 H 1.389081 -2.157590 -2.510883  
 H 0.620570 -3.474417 -3.450914  
 C 1.027052 5.551804 -0.042789  
 H 0.930747 5.609268 -1.125117  
 C 0.346693 1.784828 -3.203194  
 H 0.049134 1.619196 -4.233259  
 C -0.429267 -0.753548 2.374841  
 C -1.379155 -1.077927 4.562644  
 C 0.882580 -0.864475 2.912469  
 C -0.081658 -1.188678 5.110936  
 H -2.245296 -1.166728 5.212051  
 C 1.988720 -0.722130 2.034561  
 C 1.025017 -1.083682 4.303380  
 H 0.037360 -1.358236 6.177113  
 H 2.026087 -1.167154 4.718794  
 H 2.990756 -0.757361 2.459881  
 Pd 3.189396 -0.085050 -0.711413  
 C 5.746989 -0.074662 -1.961248  
 O 6.728115 0.111401 -2.655104  
 O 4.556469 0.395887 -2.164386  
 N 4.622710 -1.441478 -0.231726  
 C 4.486473 -2.660081 0.153951  
 C 5.603164 -3.646166 0.298099  
 H 6.422475 -3.229949 0.890241  
 H 6.003444 -3.915611 -0.685359  
 H 5.225749 -4.547663 0.781838  
 O 3.305827 -3.170477 0.459523  
 C 5.908950 -0.918877 -0.676961  
 C 1.804955 -0.545862 0.676936  
 H 6.640912 -1.706811 -0.868225

C 0.455284 -0.511541 0.243487  
 H 0.218076 -0.422213 -0.810774  
 N -0.597034 -0.539618 1.037985  
 C -1.554957 -0.860387 3.216354  
 H -2.540867 -0.790642 2.765473  
 H 6.314852 -0.258693 0.100614  
 H 2.613433 -2.478173 0.359050  
 104  
 cis-T25-Q\_C3\_IN3 Eopt -2905.031449  
 Pd -2.327783 -0.599106 0.228217  
 C -4.734050 0.435533 -0.860986  
 C -4.299976 -1.822176 -1.370441  
 C -5.916534 0.407383 -1.588547  
 C -5.469640 -1.916557 -2.110705  
 H -6.502009 1.317401 -1.661650  
 H -5.697236 -2.856050 -2.602791  
 N -4.000874 -0.670681 -0.769187  
 H -7.208445 -0.837229 -2.777007  
 C -6.286562 -0.788831 -2.204312  
 N -2.225213 -2.503826 -0.443195  
 N -2.987584 1.394627 0.458445  
 C -3.245432 -2.896182 -1.249567  
 C -4.136027 1.649486 -0.203460  
 O -3.361514 -3.950742 -1.858654  
 O -4.693384 2.744918 -0.343200  
 C -1.026546 -3.222417 -0.420403  
 C -0.633713 -3.914375 0.735901  
 C -0.127121 -3.127798 -1.497320  
 C 0.617957 -4.532412 0.803342  
 C 1.120449 -3.756560 -1.440438  
 C 1.474463 -4.452283 -0.289510  
 H 2.442713 -4.943287 -0.242073  
 C -2.401416 2.565351 1.084726  
 C -1.722383 3.529353 0.068149  
 H -3.223115 3.153738 1.520087  
 C -1.434204 2.208326 2.193896  
 C -0.927792 4.624883 0.753406  
 H -2.547301 3.993079 -0.484913  
 H -1.885740 1.453565 2.844572  
 H -0.527313 1.766010 1.768234  
 C -1.065496 3.447442 2.992146  
 C -0.593582 4.576837 2.112638  
 H -1.942936 3.782914 3.564892  
 H -0.292462 3.205713 3.732089  
 C 0.176556 5.610287 2.658251  
 C 0.270900 6.727536 0.531702  
 C -0.880413 2.792326 -0.945455  
 C 0.608492 6.677571 1.883711  
 H 0.438934 5.566276 3.713427  
 H 0.600715 7.557055 -0.087423  
 C 0.456759 2.477357 -0.715562  
 C -1.440877 2.352403 -2.146972  
 H 1.208269 7.466539 2.329076

N 1.199291 1.767938 -1.580658  
 H 0.947996 2.784541 0.201167  
 H -2.487125 2.564711 -2.352061  
 C 0.664789 1.386539 -2.753183  
 H 1.320623 0.828410 -3.417167  
 H 0.923707 -5.079004 1.687451  
 H 1.806767 -3.705745 -2.277873  
 O -1.531713 -3.907885 1.748853  
 O -0.542170 -2.359747 -2.530539  
 C -1.164764 -4.548967 2.945744  
 H -0.273257 -4.088474 3.392588  
 H -2.009862 -4.423359 3.624716  
 H -0.983411 -5.620475 2.790811  
 C 0.325333 -2.216085 -3.636282  
 H -0.209360 -1.589449 -4.351777  
 H 1.265699 -1.720957 -3.363600  
 H 0.540101 -3.185656 -4.102140  
 C -0.488881 5.706326 -0.019871  
 H -0.749725 5.735010 -1.075923  
 C -0.658112 1.666243 -3.065623  
 H -1.065321 1.328391 -4.012828  
 C -0.129424 -0.674801 2.411944  
 C -0.787038 -1.066184 4.694615  
 C 1.163584 -0.267679 2.839181  
 C 0.489407 -0.649115 5.134631  
 H -1.528665 -1.380998 5.423013  
 C 2.106161 0.134410 1.856447  
 C 1.442906 -0.254005 4.227285  
 H 0.714290 -0.641035 6.197170  
 H 2.424628 0.074389 4.559668  
 H 3.066106 0.522930 2.191481  
 C 1.804645 0.025477 0.518601  
 C 0.498278 -0.400868 0.193624  
 H 0.182054 -0.480865 -0.841599  
 N -0.442590 -0.650723 1.085042  
 C -1.099324 -1.070933 3.355735  
 H -2.070258 -1.389293 2.987185  
 Pd 2.911199 0.635862 -1.021970  
 C 3.835645 -1.324726 -1.270373  
 C 4.693594 -0.555355 -0.506406  
 H 3.219772 -2.082807 -0.794010  
 H 3.874437 -1.314199 -2.357195  
 H 5.441574 0.083778 -0.968473  
 C 4.885754 -0.787934 0.951344  
 O 5.492377 -0.034888 1.681508  
 O 4.316924 -1.929270 1.352657  
 C 4.390961 -2.223944 2.753033  
 C 3.404092 -3.331173 3.029844  
 H 4.160650 -1.318008 3.320820  
 H 5.420530 -2.510409 2.993672  
 H 3.414576 -3.581786 4.095495  
 H 2.392829 -3.019833 2.751996  
 H 3.654701 -4.230286 2.458447

C 3.898120 0.873764 -3.766264  
 O 3.113195 -0.049380 -4.035712  
 O 4.074757 1.379892 -2.595765  
 C 4.732806 1.516816 -4.854831  
 H 4.684509 0.926471 -5.771401  
 H 4.347193 2.522980 -5.053614  
 H 5.769989 1.628293 -4.526517  
 104  
 cis-T25-Q\_C3\_IN4 Eopt -2905.072899  
 Pd -2.358464 0.342289 -0.032473  
 C -4.030527 1.813515 -1.792832  
 C -4.317734 -0.519489 -1.879947  
 C -5.024706 2.006966 -2.742475  
 C -5.319412 -0.395482 -2.832434  
 H -5.249909 3.019924 -3.057912  
 H -5.782935 -1.298331 -3.215286  
 N -3.728195 0.576869 -1.405080  
 H -6.458819 1.009109 -3.999391  
 C -5.675962 0.885057 -3.256481  
 N -2.860576 -1.608468 -0.361426  
 N -2.278884 2.419571 -0.288718  
 C -3.782279 -1.818463 -1.335116  
 C -3.154345 2.885322 -1.207643  
 O -4.185311 -2.887224 -1.776786  
 O -3.244795 4.038985 -1.640404  
 C -2.160165 -2.699911 0.158851  
 C -2.356840 -3.092750 1.493140  
 C -1.174712 -3.349593 -0.604207  
 C -1.593512 -4.121922 2.050293  
 C -0.425379 -4.395150 -0.059408  
 C -0.645969 -4.766595 1.262478  
 H -0.060424 -5.575632 1.690341  
 C -1.285288 3.393645 0.115599  
 C -0.230070 3.627551 -1.003799  
 H -1.792926 4.361607 0.235864  
 C -0.601367 3.047044 1.423051  
 C 0.896318 4.528707 -0.541824  
 H -0.770059 4.126194 -1.817313  
 H -1.355082 2.804032 2.177893  
 H 0.020907 2.153201 1.297817  
 C 0.247307 4.220147 1.892267  
 C 1.147024 4.771569 0.814313  
 H -0.417888 5.025148 2.238824  
 H 0.849762 3.929946 2.761688  
 C 2.242674 5.567642 1.166759  
 C 2.820176 5.882227 -1.146237  
 C 0.297385 2.321515 -1.547181  
 C 3.075533 6.119365 0.203770  
 H 2.440553 5.749471 2.221185  
 H 3.463986 6.307624 -1.910802  
 C 1.411698 1.705349 -0.986908  
 C -0.336234 1.650200 -2.596252  
 H 3.923935 6.728795 0.502418

N 1.861077 0.504686 -1.384898  
 H 1.978687 2.184742 -0.194898  
 H -1.204834 2.098211 -3.070991  
 C 1.258902 -0.126045 -2.402786  
 H 1.682273 -1.081719 -2.692449  
 H -1.740207 -4.430339 3.078543  
 H 0.332465 -4.902794 -0.645147  
 O -3.304524 -2.399441 2.164464  
 O -0.989834 -2.857738 -1.853981  
 C -3.492990 -2.702492 3.525728  
 H -2.576243 -2.532266 4.105541  
 H -4.268610 -2.021942 3.878781  
 H -3.826689 -3.739044 3.664778  
 C -0.195740 -3.613569 -2.741192  
 H -0.284056 -3.122224 -3.712410  
 H 0.860090 -3.625589 -2.441019  
 H -0.566243 -4.642516 -2.824187  
 C 1.739019 5.091547 -1.506722  
 H 1.538561 4.892319 -2.557539  
 C 0.155745 0.426727 -3.036139  
 H -0.317998 -0.108607 -3.851915  
 C -1.244374 -0.039756 2.782652  
 C -2.642289 0.765392 4.574684  
 C -0.343675 -0.602232 3.728191  
 C -1.745816 0.223280 5.523939  
 H -3.532302 1.287082 4.914246  
 C 0.776917 -1.316937 3.249328  
 C -0.622374 -0.448015 5.109347  
 H -1.952398 0.336819 6.584060  
 H 0.069927 -0.873996 5.830963  
 H 1.461596 -1.767326 3.965327  
 C 0.994679 -1.467839 1.899139  
 C 0.063412 -0.845276 1.040012  
 H 0.172116 -0.916720 -0.033104  
 N -0.993469 -0.164688 1.447396  
 C -2.400258 0.637338 3.228689  
 H -3.081600 1.037704 2.482830  
 Pd 3.351590 -0.243080 -0.213457  
 C 2.117148 -2.313931 1.358393  
 C 2.437139 -2.055874 -0.098471  
 H 3.021285 -2.172263 1.961071  
 H 1.826843 -3.368315 1.485682  
 H 1.546235 -2.053970 -0.729861  
 C 3.410935 -3.017529 -0.669684  
 O 4.173816 -3.730580 -0.057742  
 O 3.341756 -3.013013 -2.028941  
 C 4.303326 -3.834885 -2.693750  
 C 4.076125 -3.681480 -4.178790  
 H 4.180161 -4.871908 -2.363291  
 H 5.308226 -3.514954 -2.398240  
 H 4.796107 -4.289834 -4.735546  
 H 3.067412 -4.005926 -4.455903  
 H 4.198843 -2.637268 -4.483718

|                  |           |              |           |    |           |           |           |
|------------------|-----------|--------------|-----------|----|-----------|-----------|-----------|
| C                | 5.373598  | 0.577299     | 0.981377  | N  | -1.834718 | -0.608961 | -1.120577 |
| O                | 4.930455  | -0.621151    | 1.073497  | H  | -1.696898 | -2.272007 | 0.076508  |
| O                | 4.770808  | 1.415530     | 0.258059  | H  | 1.147536  | -1.975359 | -3.133105 |
| C                | 6.628435  | 0.943550     | 1.715448  | C  | -1.400662 | 0.044348  | -2.204022 |
| H                | 6.720397  | 0.356122     | 2.631708  | H  | -1.930573 | 0.956300  | -2.461593 |
| H                | 7.490254  | 0.715898     | 1.077967  | H  | 1.211438  | 4.379974  | 3.163297  |
| H                | 6.637321  | 2.012772     | 1.936896  | H  | -0.914937 | 4.776343  | -0.538380 |
| 104              |           |              |           | O  | 3.017755  | 2.615295  | 2.154316  |
| cis-T25-Q_C3_IN5 | Eopt      | -2905.040955 |           | O  | 0.630728  | 2.961757  | -1.835555 |
| Pd               | 2.390625  | -0.113174    | -0.106604 | C  | 3.179288  | 2.888153  | 3.525441  |
| C                | 4.080435  | -1.361262    | -2.009808 | H  | 2.299639  | 2.575469  | 4.104186  |
| C                | 4.127227  | 0.992232     | -2.038969 | H  | 4.042335  | 2.304212  | 3.847192  |
| C                | 5.018940  | -1.427111    | -3.031027 | H  | 3.373581  | 3.953709  | 3.703272  |
| C                | 5.066145  | 0.995306     | -3.060744 | C  | -0.217000 | 3.682675  | -2.703183 |
| H                | 5.318552  | -2.402936    | -3.397475 | H  | -0.090372 | 3.229206  | -3.688088 |
| H                | 5.406655  | 1.949579     | -3.447993 | H  | -1.271184 | 3.612813  | -2.405165 |
| N                | 3.689647  | -0.171704    | -1.559690 | H  | 0.076459  | 4.738393  | -2.751524 |
| H                | 6.254840  | -0.255748    | -4.346925 | C  | -1.376521 | -5.149339 | -1.390127 |
| C                | 5.518372  | -0.231450    | -3.548689 | H  | -1.294552 | -4.887958 | -2.443190 |
| N                | 2.657480  | 1.886241     | -0.406434 | C  | -0.330735 | -0.414956 | -2.957320 |
| N                | 2.505067  | -2.184165    | -0.412923 | H  | 0.003977  | 0.145837  | -3.823524 |
| C                | 3.487756  | 2.214684     | -1.430009 | C  | 1.284804  | 0.003081  | 2.748147  |
| C                | 3.352648  | -2.531675    | -1.407384 | C  | 2.800195  | -0.659914 | 4.499198  |
| O                | 3.738260  | 3.328940     | -1.870786 | C  | 0.283830  | 0.296980  | 3.713870  |
| O                | 3.523979  | -3.656247    | -1.889000 | C  | 1.811129  | -0.377969 | 5.468351  |
| C                | 1.838955  | 2.866595     | 0.159831  | H  | 3.772718  | -1.025074 | 4.815869  |
| C                | 1.989165  | 3.216737     | 1.513236  | C  | -0.960973 | 0.788163  | 3.264946  |
| C                | 0.774676  | 3.425412     | -0.569451 | C  | 0.579221  | 0.091891  | 5.084517  |
| C                | 1.103020  | 4.110283     | 2.119559  | H  | 2.030620  | -0.532694 | 6.520534  |
| C                | -0.094239 | 4.344961     | 0.023589  | H  | -0.187430 | 0.313164  | 5.822311  |
| C                | 0.078006  | 4.669666     | 1.363939  | H  | -1.741881 | 1.004164  | 3.990490  |
| H                | -0.606631 | 5.370841     | 1.832519  | C  | -1.184506 | 1.010643  | 1.922477  |
| C                | 1.649043  | -3.269315    | 0.029791  | C  | -0.124088 | 0.702406  | 1.037566  |
| C                | 0.521571  | -3.563389    | -0.999939 | H  | -0.229379 | 0.872277  | -0.025202 |
| H                | 2.259413  | -4.183307    | 0.058182  | N  | 1.027219  | 0.193226  | 1.419124  |
| C                | 1.060083  | -3.048848    | 1.408665  | C  | 2.545136  | -0.473785 | 3.161421  |
| C                | -0.486461 | -4.568098    | -0.480140 | H  | 3.293819  | -0.673129 | 2.399744  |
| H                | 1.026757  | -3.993874    | -1.872759 | Pd | -3.454688 | 0.170962  | 0.158936  |
| H                | 1.853853  | -2.762905    | 2.105133  | C  | -2.458647 | 1.546383  | 1.436581  |
| H                | 0.341669  | -2.221765    | 1.383320  | C  | -2.657658 | 2.116276  | 0.157999  |
| C                | 0.372037  | -4.317647    | 1.891672  | H  | -4.652914 | 0.642796  | 0.976768  |
| C                | -0.586525 | -4.890918    | 0.878332  | H  | -3.149117 | 1.863068  | 2.215082  |
| H                | 1.137231  | -5.074452    | 2.120545  | H  | -1.840196 | 2.159920  | -0.554335 |
| H                | -0.158334 | -4.127108    | 2.832543  | C  | -3.699044 | 3.149055  | -0.034833 |
| C                | -1.584061 | -5.781450    | 1.290677  | O  | -4.511846 | 3.511205  | 0.784603  |
| C                | -2.356879 | -6.038150    | -0.972004 | O  | -3.610885 | 3.660759  | -1.278171 |
| C                | -0.160714 | -2.297269    | -1.457767 | C  | -4.599680 | 4.644032  | -1.609905 |
| C                | -2.464103 | -6.352758    | 0.382680  | C  | -4.315894 | 5.110486  | -3.017057 |
| H                | -1.667371 | -6.022042    | 2.348471  | H  | -4.544074 | 5.461301  | -0.883518 |
| H                | -3.035054 | -6.482300    | -1.695593 | H  | -5.590622 | 4.187681  | -1.518846 |
| C                | -1.250578 | -1.761135    | -0.771920 | H  | -5.055822 | 5.858237  | -3.319542 |
| C                | 0.301465  | -1.590538    | -2.569543 | H  | -3.322059 | 5.565190  | -3.085756 |
| H                | -3.233213 | -7.038373    | 0.727386  | H  | -4.364538 | 4.273826  | -3.720915 |

C -4.694047 -2.014865 -0.468095  
 O -4.836380 -1.047773 -1.256399  
 O -4.027678 -1.893450 0.611773  
 C -5.282932 -3.364393 -0.784099  
 H -4.473316 -4.098455 -0.855409  
 H -5.936035 -3.679777 0.035325  
 H -5.845193 -3.334921 -1.718563  
 96  
 cis-T25-Q\_C3\_TSI Eopt -2767.367396  
 Pd -2.276062 0.194404 -0.091679  
 C -4.025118 1.917331 -1.514260  
 C -4.463316 -0.381771 -1.774364  
 C -5.062457 2.247551 -2.376021  
 C -5.519493 -0.118324 -2.634566  
 H -5.244867 3.294863 -2.590817  
 H -6.067931 -0.955880 -3.052154  
 N -3.783980 0.636500 -1.246658  
 H -6.638883 1.445151 -3.601475  
 C -5.818072 1.212844 -2.928827  
 N -2.875656 -1.673447 -0.585587  
 N -2.202556 2.299685 -0.021427  
 C -3.969427 -1.754595 -1.381857  
 C -3.089037 2.889825 -0.850752  
 O -4.538141 -2.759406 -1.786961  
 O -3.186220 4.095665 -1.106929  
 C -2.253059 -2.822409 -0.085021  
 C -2.594888 -3.302523 1.189523  
 C -1.172430 -3.405832 -0.766170  
 C -1.880125 -4.352386 1.769695  
 C -0.447025 -4.450027 -0.187288  
 C -0.813409 -4.908486 1.072349  
 H -0.246408 -5.716715 1.525389  
 C -1.343274 3.231747 0.682865  
 C -0.215026 3.815626 -0.213470  
 H -1.957860 4.099767 0.964671  
 C -0.765949 2.631983 1.948251  
 C 0.843650 4.558626 0.579536  
 H -0.714793 4.527182 -0.880705  
 H -1.569257 2.160846 2.522360  
 H -0.049367 1.843039 1.694687  
 C -0.079173 3.704762 2.776918  
 C 0.927689 4.488744 1.975480  
 H -0.839099 4.394953 3.172777  
 H 0.410390 3.256963 3.650464  
 C 1.957703 5.175279 2.628221  
 C 2.803778 5.994191 0.532230  
 C 0.401600 2.757839 -1.093130  
 C 2.889873 5.922212 1.922028  
 H 2.022828 5.113680 3.712727  
 H 3.527648 6.572417 -0.034776  
 C 1.443689 1.944826 -0.651938  
 C -0.087064 2.529756 -2.380192  
 H 3.684026 6.442788 2.449986

N 1.967136 0.968517 -1.402907  
 H 1.873803 2.072330 0.335687  
 H -0.911936 3.134746 -2.747999  
 C 1.522540 0.786395 -2.655045  
 H 2.011255 0.005676 -3.227931  
 H -2.137588 -4.728934 2.752578  
 H 0.413181 -4.879030 -0.686054  
 O -3.617855 -2.651429 1.795718  
 O -0.870690 -2.849057 -1.966927  
 C -4.002412 -3.095631 3.073340  
 H -3.186074 -2.984859 3.800212  
 H -4.840184 -2.462677 3.371444  
 H -4.331136 -4.142633 3.054252  
 C 0.220739 -3.392015 -2.677348  
 H 0.297048 -2.807303 -3.596108  
 H 1.157786 -3.313486 -2.110063  
 H 0.045258 -4.444183 -2.934781  
 C 1.787963 5.315268 -0.124590  
 H 1.721201 5.360175 -1.209680  
 C 0.489959 1.548743 -3.177410  
 H 0.144051 1.366898 -4.189338  
 C -0.462963 -0.642359 2.273214  
 C -1.419176 -0.529078 4.479519  
 C 0.787526 -1.029764 2.831231  
 C -0.175299 -0.884881 5.047356  
 H -2.272082 -0.351925 5.128470  
 C 1.847530 -1.323634 1.946622  
 C 0.906217 -1.132782 4.238585  
 H -0.082017 -0.971445 6.125672  
 H 1.864338 -1.423251 4.661278  
 H 2.809097 -1.629823 2.353974  
 Pd 3.258411 -0.494003 -0.687619  
 C 5.954046 -0.279734 -1.476325  
 O 7.002531 0.115914 -1.939039  
 O 4.794990 0.296219 -1.690077  
 N 4.572529 -1.931892 -0.302649  
 C 4.166838 -3.183273 -0.246520  
 C 5.164495 -4.313626 -0.245713  
 H 5.994899 -4.121330 0.439549  
 H 5.583760 -4.445595 -1.250014  
 H 4.653318 -5.232723 0.041935  
 O 2.933241 -3.484460 -0.186569  
 C 5.933920 -1.516313 -0.562942  
 C 1.659079 -1.294437 0.573981  
 H 2.268461 -2.273551 0.014676  
 H 6.526439 -2.299146 -1.046894  
 C 0.375949 -0.895511 0.124567  
 H 0.147730 -0.875998 -0.935078  
 N -0.605960 -0.517063 0.918075  
 C -1.564900 -0.404209 3.117290  
 H -2.516650 -0.149545 2.659701  
 H 6.447985 -1.243215 0.369107

104

cis-T25-Q\_C3\_TSII Eopt -2905.006829

Pd -2.634457 -0.058382 0.148917  
C -4.622642 1.399631 -1.265885  
C -4.809760 -0.938315 -1.423527  
C -5.735780 1.577790 -2.076913  
C -5.929347 -0.830372 -2.235430  
H -6.042659 2.589799 -2.317465  
H -6.390200 -1.740289 -2.604445  
N -4.223468 0.167438 -0.964874  
H -7.272677 0.557733 -3.185415  
C -6.397194 0.445574 -2.552107  
N -3.053392 -2.008982 -0.240467  
N -2.762896 2.056225 0.081134  
C -4.119468 -2.225598 -1.056435  
C -3.755895 2.497464 -0.720187  
O -4.522230 -3.293849 -1.496633  
O -3.991530 3.666227 -1.049366  
C -2.166004 -3.057708 0.008886  
C -1.990724 -3.552191 1.311458  
C -1.342551 -3.548971 -1.019968  
C -1.041224 -4.544971 1.573252  
C -0.412931 -4.562440 -0.770654  
C -0.279127 -5.049847 0.526288  
H 0.440988 -5.838629 0.725616  
C -1.935847 3.130497 0.605157  
C -0.943401 3.691432 -0.449477  
H -2.605719 3.971436 0.837731  
C -1.212143 2.748206 1.876954  
C 0.102801 4.610759 0.154002  
H -1.559256 4.277992 -1.140915  
H -1.921047 2.291228 2.572313  
H -0.443997 1.998645 1.662227  
C -0.567948 3.970963 2.508360  
C 0.298395 4.727265 1.535284  
H -1.356603 4.640214 2.883751  
H 0.025542 3.677177 3.382846  
C 1.307023 5.573521 2.009119  
C 1.911872 6.185807 -0.235159  
C -0.297210 2.601995 -1.269671  
C 2.109667 6.298902 1.140392  
H 1.460595 5.654580 3.083354  
H 2.534035 6.745140 -0.928090  
C 0.811879 1.886384 -0.817518  
C -0.806703 2.261221 -2.522687  
H 2.890693 6.945242 1.531139  
N 1.388791 0.914265 -1.530674  
H 1.260476 2.097686 0.148058  
H -1.686968 2.779596 -2.895103  
C 0.929171 0.637672 -2.759395  
H 1.480479 -0.116574 -3.311323  
H -0.906823 -4.937035 2.574279  
H 0.196581 -4.971343 -1.568658  
O -2.777647 -2.988721 2.255399

O -1.493671 -2.934020 -2.216394  
C -2.605187 -3.413811 3.586261  
H -1.587100 -3.211573 3.944260  
H -3.313015 -2.833874 4.180151  
H -2.827906 -4.482544 3.699300  
C -0.663670 -3.344765 -3.275555  
H -0.935276 -2.720315 -4.127970  
H 0.398754 -3.191324 -3.038078  
H -0.828760 -4.398357 -3.532968  
C 0.917066 5.346751 -0.714995  
H 0.764415 5.246518 -1.787691  
C -0.178091 1.284062 -3.285962  
H -0.538787 1.022174 -4.275351  
C -0.655900 -0.326108 2.504128  
C -1.494821 0.123244 4.715563  
C 0.676070 -0.343545 3.004151  
C -0.173867 0.144816 5.218311  
H -2.327975 0.289625 5.392317  
C 1.727771 -0.644001 2.110345  
C 0.890183 -0.084433 4.381086  
H -0.004700 0.334315 6.274125  
H 1.909393 -0.085737 4.757732  
H 2.758090 -0.669721 2.461872  
C 1.443788 -1.006879 0.806554  
C 0.092447 -0.936077 0.391857  
H -0.181591 -1.164839 -0.633214  
N -0.889710 -0.524525 1.171784  
C -1.735893 -0.099822 3.380420  
H -2.741349 -0.120445 2.969627  
Pd 2.728652 -0.579216 -0.783009  
C 2.500742 -2.614346 0.314452  
C 3.750518 -2.304519 -0.308390  
H 2.541983 -2.864021 1.368676  
H 1.760532 -3.182533 -0.243383  
H 3.992482 -2.692057 -1.295098  
C 4.879242 -1.932202 0.574617  
O 4.761059 -1.674426 1.759401  
O 6.029754 -1.888185 -0.093020  
C 7.114529 -1.248168 0.594988  
C 8.254069 -1.125338 -0.385597  
H 7.381540 -1.846922 1.472192  
H 6.764527 -0.268366 0.930537  
H 9.114729 -0.655219 0.101249  
H 8.562091 -2.106695 -0.760529  
H 7.954133 -0.502072 -1.232800  
C 4.953942 0.529239 -1.978629  
O 5.114420 0.890018 -0.810737  
O 3.961698 -0.188693 -2.397571  
C 5.950860 0.890547 -3.062109  
H 6.673166 1.617220 -2.685710  
H 6.478385 -0.014151 -3.384285  
H 5.433515 1.294227 -3.937403

104

cis-T25-Q\_C3\_TSIII Eopt -2905.025424

Pd -2.130757 -1.091103 -0.034401  
C -4.242124 -0.962148 -1.926069  
C -2.997500 -2.958410 -1.965571  
C -5.077250 -1.422282 -2.935199  
C -3.794825 -3.476989 -2.976031  
H -5.870027 -0.771745 -3.288209  
H -3.563242 -4.463422 -3.363168  
N -3.255855 -1.741087 -1.489717  
H -5.487986 -3.080493 -4.244213  
C -4.848069 -2.697018 -3.454520  
N -1.248940 -2.893298 -0.359898  
N -3.381509 0.580732 -0.320958  
C -1.777543 -3.621932 -1.380526  
C -4.288235 0.405451 -1.304686  
O -1.368554 -4.679112 -1.839447  
O -5.074920 1.245233 -1.758806  
C 0.059599 -3.149470 0.056931  
C 1.134266 -2.906953 -0.820324  
C 0.331119 -3.523267 1.382950  
C 2.454111 -3.057647 -0.384509  
C 1.649003 -3.660009 1.826845  
C 2.691884 -3.432831 0.933664  
H 3.717397 -3.546797 1.274912  
C -3.323629 1.938531 0.188537  
C -2.710719 2.934431 -0.842987  
H -4.357436 2.284825 0.337613  
C -2.602301 2.029714 1.518618  
C -2.390035 4.284963 -0.232039  
H -3.488378 3.074835 -1.602113  
H -3.002388 1.272070 2.199227  
H -1.536178 1.813538 1.382288  
C -2.775629 3.417183 2.114843  
C -2.393260 4.509629 1.150010  
H -3.826903 3.551733 2.410487  
H -2.186742 3.513904 3.035299  
C -2.052647 5.778321 1.632903  
C -1.719648 6.591439 -0.604389  
C -1.513845 2.347171 -1.553171  
C -1.718125 6.813972 0.772170  
H -2.050624 5.946287 2.708108  
H -1.459605 7.391946 -1.291206  
C -0.228037 2.446411 -1.031377  
C -1.664544 1.633406 -2.744540  
H -1.453148 7.789588 1.170221  
N 0.842581 1.854730 -1.589142  
H -0.043679 3.016863 -0.128222  
H -2.653545 1.538460 -3.186015  
C 0.684917 1.175790 -2.734801  
H 1.583355 0.706980 -3.122077  
H 3.283170 -2.855056 -1.052397  
H 1.866778 -3.952225 2.847254  
O 0.784049 -2.501730 -2.056958

O -0.758134 -3.712679 2.165136  
C 1.798740 -2.442262 -3.041620  
H 2.293685 -3.415860 -3.147515  
H 1.285030 -2.201367 -3.974673  
H 2.530028 -1.660645 -2.807772  
C -0.541857 -4.058231 3.511194  
H -0.007681 -5.012801 3.601463  
H 0.018226 -3.277073 4.043260  
H -1.531928 -4.152672 3.959069  
C -2.052210 5.336412 -1.092679  
H -2.046475 5.153537 -2.165250  
C -0.554355 1.058592 -3.348166  
H -0.642846 0.501233 -4.274997  
C -1.246307 -0.716308 2.860783  
C -2.904457 -1.290159 4.511814  
C -0.349746 -0.321039 3.890715  
C -2.019779 -0.902282 5.543743  
H -3.890613 -1.667792 4.765180  
C 0.343532 -0.217990 1.244173  
C 0.915296 0.189301 3.521661  
C -0.768473 -0.426330 5.239915  
H -2.334974 -0.982230 6.579775  
C 1.284660 0.237876 2.197498  
H 0.595221 -0.194703 0.188295  
H -0.081866 -0.122298 6.025591  
H 1.591146 0.545612 4.296011  
Pd 2.524336 1.295143 -0.393816  
C 2.577124 0.835543 1.781975  
C 3.576686 0.166852 1.045753  
H 1.965858 2.197587 0.758383  
H 2.948356 1.639256 2.418653  
H 3.432597 -0.855833 0.705721  
C 4.966109 0.684094 1.143909  
O 5.281760 1.689275 1.743085  
O 5.813127 -0.116272 0.493893  
C 7.138696 0.409829 0.329497  
C 7.940777 -0.623029 -0.423184  
H 7.561173 0.623840 1.316333  
H 7.053266 1.347864 -0.226294  
H 8.964799 -0.264300 -0.569139  
H 7.981650 -1.568925 0.126591  
H 7.499881 -0.810678 -1.406789  
C 4.510956 0.705545 -2.270229  
O 3.355201 0.192374 -1.978274  
O 4.984343 1.700825 -1.723834  
C 5.258252 -0.037491 -3.359669  
H 5.481464 -1.055054 -3.020229  
H 4.635157 -0.124376 -4.255805  
H 6.187551 0.478769 -3.606212  
C -2.529492 -1.198570 3.193223  
H -3.188522 -1.502705 2.384978  
N -0.870159 -0.621895 1.550426

96



cis-T25-Q\_C5\_IN2 Eopt -2767.369346

Pd -2.553094 0.618703 0.273171  
C -3.614021 2.821496 -1.172454  
C -5.026819 0.946601 -1.048355  
C -4.523915 3.496417 -1.975854  
C -5.980362 1.567423 -1.841963  
H -4.270577 4.494449 -2.316327  
H -6.887043 1.022428 -2.081743  
N -3.908931 1.601187 -0.733303  
H -6.450894 3.367193 -2.925237  
C -5.720636 2.858810 -2.302038  
N -3.983932 -0.812762 0.146479  
N -1.595086 2.514947 0.073106  
C -5.116257 -0.460695 -0.518660  
C -2.294116 3.365898 -0.706985  
O -6.117069 -1.137403 -0.711930  
O -1.978723 4.519668 -1.025276  
C -3.850372 -2.106826 0.656749  
C -3.722616 -2.308804 2.040170  
C -3.769014 -3.216683 -0.201298  
C -3.526894 -3.589807 2.558794  
C -3.586381 -4.501977 0.312758  
C -3.467676 -4.671361 1.686755  
H -3.322945 -5.670159 2.088563  
C -0.489972 3.163137 0.765611  
C 0.728316 3.525937 -0.125065  
H -0.861365 4.138879 1.117928  
C -0.033677 2.376247 1.974624  
C 1.898802 4.041123 0.692793  
H 0.375150 4.337708 -0.769796  
H -0.913176 2.046865 2.538036  
H 0.505836 1.481311 1.647808  
C 0.865012 3.228504 2.855351  
C 1.983216 3.875747 2.080055  
H 0.259117 4.012336 3.333924  
H 1.282636 2.625858 3.671969  
C 3.119816 4.338945 2.752368  
C 4.073175 5.126145 0.691078  
C 1.167804 2.413326 -1.045225  
C 4.159169 4.957250 2.072503  
H 3.183383 4.202541 3.830217  
H 4.881231 5.603088 0.144167  
C 2.126134 1.469815 -0.674173  
C 0.641855 2.320020 -2.333829  
H 5.036623 5.300572 2.613244  
N 2.542449 0.496186 -1.494525  
H 2.587985 1.497850 0.306751  
H -0.112803 3.036013 -2.649379  
C 2.066387 0.447428 -2.745688  
H 2.456397 -0.341636 -3.377098  
H -3.431773 -3.752649 3.625858  
H -3.529348 -5.362061 -0.343841  
O -3.793292 -1.185038 2.800031

O -3.851269 -2.930739 -1.522255  
C -3.748698 -1.342578 4.196386  
H -2.790343 -1.767969 4.527371  
H -3.864003 -0.341411 4.615885  
H -4.565022 -1.981265 4.557030  
C -3.800369 -4.004662 -2.428340  
H -3.905415 -3.564450 -3.421390  
H -2.842891 -4.539956 -2.365847  
H -4.622575 -4.711172 -2.259321  
C 2.950718 4.670272 0.016139  
H 2.883410 4.788365 -1.063295  
C 1.112320 1.342331 -3.200998  
H 0.745937 1.265716 -4.219270  
C -0.319897 -1.274699 0.088817  
C -0.645890 -0.607594 2.289633  
C -0.889419 -1.618887 -1.159772  
C 1.042685 -1.582242 0.346984  
C 0.636635 -1.043666 2.664226  
H -1.319206 -0.159103 3.010959  
C -0.110573 -2.249470 -2.099025  
H -1.944978 -1.436233 -1.331895  
C 1.892196 -1.994608 -0.728118  
H 0.941006 -0.983543 3.703445  
H -0.560916 -2.577478 -3.032606  
C 1.282967 -2.392908 -1.902811  
H 1.891268 -2.753052 -2.730834  
Pd 3.714475 -1.067827 -0.773332  
C 6.494158 -0.522571 -0.438634  
O 7.601668 -0.021307 -0.392422  
O 5.412335 0.053357 -0.860956  
N 4.984847 -2.477121 -0.079259  
C 4.709932 -3.704392 0.204438  
C 5.724131 -4.690971 0.686993  
H 6.482484 -4.862302 -0.084818  
H 5.235533 -5.635615 0.926634  
H 6.242993 -4.309757 1.572218  
O 3.494587 -4.189404 0.086051  
C 6.347506 -1.974320 0.049988  
H 7.048391 -2.589971 -0.526515  
C 1.505352 -1.439703 1.674807  
H 2.542810 -1.679620 1.893592  
N -1.078293 -0.648124 1.044122  
H 6.672863 -2.003383 1.097718  
H 2.899130 -3.452631 -0.251400

104

cis-T25-Q\_C5\_IN3 Eopt -2905.005521

Pd -2.744463 0.672013 0.452028  
C -3.775597 3.120437 -0.557962  
C -5.325667 1.356079 -0.466052  
C -4.718202 3.963359 -1.132738  
C -6.314332 2.146519 -1.033486  
H -4.421556 4.977535 -1.376795  
H -7.291265 1.707441 -1.204911

|   |           |           |           |                  |           |              |           |
|---|-----------|-----------|-----------|------------------|-----------|--------------|-----------|
| N | -4.119373 | 1.876411  | -0.238316 | H                | -5.584378 | -4.148052    | -2.332941 |
| H | -6.756475 | 4.105750  | -1.808291 | C                | 2.933971  | 4.481849     | -0.259092 |
| C | -6.000141 | 3.465350  | -1.363239 | H                | 2.666096  | 4.784158     | -1.269486 |
| N | -4.310858 | -0.613424 | 0.370340  | C                | 0.580039  | 1.444890     | -3.428915 |
| N | -1.639285 | 2.503367  | 0.327846  | H                | 0.110611  | 1.485529     | -4.406293 |
| C | -5.478498 | -0.095060 | -0.093176 | C                | -0.724676 | -1.362104    | -0.185595 |
| C | -2.362195 | 3.501103  | -0.222994 | C                | -0.753598 | -0.901384    | 2.092210  |
| O | -6.555502 | -0.661783 | -0.222896 | C                | -1.454641 | -1.545589    | -1.383201 |
| O | -1.996579 | 4.665041  | -0.434164 | C                | 0.634725  | -1.772831    | -0.112619 |
| C | -4.242307 | -1.964410 | 0.721864  | C                | 0.524601  | -1.452184    | 2.271371  |
| C | -3.975473 | -2.333777 | 2.049681  | H                | -1.309863 | -0.484334    | 2.924137  |
| C | -4.367700 | -2.971027 | -0.250087 | C                | -0.832966 | -2.127506    | -2.460551 |
| C | -3.841501 | -3.677583 | 2.402791  | H                | -2.506094 | -1.280247    | -1.412249 |
| C | -4.248209 | -4.317490 | 0.099562  | C                | 1.303351  | -2.112015    | -1.325577 |
| C | -3.985883 | -4.652803 | 1.422254  | H                | 0.948058  | -1.519959    | 3.267350  |
| H | -3.888842 | -5.699525 | 1.696126  | H                | -1.405331 | -2.331328    | -3.362173 |
| C | -0.377855 | 2.970600  | 0.889807  | C                | 0.561050  | -2.375210    | -2.450616 |
| C | 0.692396  | 3.368161  | -0.158910 | H                | 1.049243  | -2.676998    | -3.374932 |
| H | -0.590414 | 3.910520  | 1.424278  | C                | 1.257270  | -1.791875    | 1.157865  |
| C | 0.210981  | 1.987289  | 1.876782  | H                | 2.289861  | -2.117572    | 1.250832  |
| C | 2.005334  | 3.754359  | 0.494428  | N                | -1.322409 | -0.788129    | 0.906474  |
| H | 0.284600  | 4.246149  | -0.669980 | Pd               | 3.182055  | -1.400108    | -1.419098 |
| H | -0.574645 | 1.660863  | 2.565715  | C                | 3.432891  | -3.607322    | -1.293155 |
| H | 0.565430  | 1.101058  | 1.342325  | C                | 4.594783  | -2.959385    | -0.915344 |
| C | 1.355725  | 2.613117  | 2.660316  | H                | 2.788465  | -4.027832    | -0.528003 |
| C | 2.339328  | 3.356234  | 1.792965  | H                | 3.290444  | -3.958677    | -2.310012 |
| H | 0.942525  | 3.315721  | 3.399339  | H                | 5.397296  | -2.754778    | -1.617612 |
| H | 1.884339  | 1.840927  | 3.232907  | C                | 4.909641  | -2.799562    | 0.533049  |
| C | 3.601810  | 3.684117  | 2.299339  | O                | 4.161982  | -3.118444    | 1.435317  |
| C | 4.179200  | 4.812191  | 0.255773  | O                | 6.123098  | -2.285802    | 0.702711  |
| C | 0.934576  | 2.316553  | -1.212802 | C                | 6.441667  | -1.901519    | 2.050360  |
| C | 4.517513  | 4.404202  | 1.546264  | C                | 7.846744  | -1.352203    | 2.038891  |
| H | 3.863749  | 3.359514  | 3.304137  | H                | 6.342441  | -2.775887    | 2.701062  |
| H | 4.883907  | 5.382303  | -0.343608 | H                | 5.705785  | -1.151333    | 2.355364  |
| C | 1.841021  | 1.272547  | -1.014707 | H                | 8.128610  | -1.034722    | 3.048043  |
| C | 0.280803  | 2.377113  | -2.441793 | H                | 8.562781  | -2.108719    | 1.702706  |
| H | 5.493199  | 4.645149  | 1.959489  | H                | 7.917860  | -0.487252    | 1.372727  |
| N | 2.087484  | 0.347071  | -1.949679 | C                | 5.029832  | 0.371791     | -0.341116 |
| H | 2.408041  | 1.166989  | -0.094274 | O                | 4.291116  | 0.152517     | 0.632276  |
| H | -0.441058 | 3.170178  | -2.620016 | O                | 4.920035  | -0.213160    | -1.483620 |
| C | 1.491382  | 0.441971  | -3.145021 | C                | 6.115750  | 1.421750     | -0.260098 |
| H | 1.742974  | -0.320996 | -3.872142 | H                | 6.430624  | 1.556373     | 0.777096  |
| H | -3.637242 | -3.969201 | 3.426192  | H                | 6.966129  | 1.165932     | -0.896528 |
| H | -4.349435 | -5.098105 | -0.645122 | H                | 5.698777  | 2.374477     | -0.605947 |
| O | -3.854404 | -1.303189 | 2.925782  | 104              |           |              |           |
| O | -4.576681 | -2.529161 | -1.513264 | cis-T25-Q_C5_IN4 | Eopt      | -2905.057991 |           |
| C | -3.646012 | -1.623535 | 4.278765  | Pd               | -2.724041 | 0.570144     | 0.256153  |
| H | -2.696240 | -2.156574 | 4.428575  | C                | -4.288827 | 2.691033     | -0.800114 |
| H | -3.614301 | -0.671375 | 4.811715  | C                | -5.444391 | 0.664485     | -0.511881 |
| H | -4.464757 | -2.234459 | 4.680032  | C                | -5.413749 | 3.295460     | -1.345520 |
| C | -4.725983 | -3.492357 | -2.525945 | C                | -6.605025 | 1.209912     | -1.041508 |
| H | -4.902166 | -2.934336 | -3.447177 | H                | -5.341707 | 4.330238     | -1.662026 |
| H | -3.820124 | -4.104244 | -2.637504 | H                | -7.483222 | 0.578096     | -1.119784 |

|   |           |           |           |                  |           |              |           |
|---|-----------|-----------|-----------|------------------|-----------|--------------|-----------|
| N | -4.355491 | 1.424798  | -0.398720 | H                | -4.823452 | -4.822250    | -2.110388 |
| H | -7.477628 | 2.992487  | -1.874893 | C                | 2.135357  | 5.038871     | -1.104999 |
| C | -6.582178 | 2.541832  | -1.456253 | H                | 1.854968  | 5.025807     | -2.156291 |
| N | -4.003419 | -1.013871 | 0.334592  | C                | 0.583741  | 0.636253     | -3.130808 |
| N | -2.038891 | 2.554460  | -0.001711 | H                | 0.167750  | 0.244111     | -4.052615 |
| C | -5.277568 | -0.764458 | -0.066652 | C                | -0.515074 | -1.424155    | -0.152375 |
| C | -2.959605 | 3.355448  | -0.586793 | C                | -0.511356 | -0.467185    | 1.967723  |
| O | -6.224277 | -1.539639 | -0.097670 | C                | -1.184273 | -1.651921    | -1.375106 |
| O | -2.822556 | 4.540551  | -0.908046 | C                | 0.707141  | -2.101918    | 0.118444  |
| C | -3.634255 | -2.310411 | 0.702712  | C                | 0.655215  | -1.152015    | 2.334462  |
| C | -3.187142 | -2.572445 | 2.008044  | H                | -1.012775 | 0.190071     | 2.666913  |
| C | -3.618940 | -3.352479 | -0.240438 | C                | -0.650443 | -2.527955    | -2.286018 |
| C | -2.717219 | -3.838723 | 2.361033  | H                | -2.139034 | -1.167925    | -1.550950 |
| C | -3.170541 | -4.626291 | 0.113517  | C                | 1.314412  | -2.893463    | -0.903201 |
| C | -2.719379 | -4.851173 | 1.408157  | H                | 1.061475  | -1.021378    | 3.331167  |
| H | -2.360751 | -5.839232 | 1.682233  | H                | -1.187015 | -2.733786    | -3.207987 |
| C | -0.860245 | 3.286514  | 0.426494  | C                | 0.607616  | -3.122925    | -2.062929 |
| C | 0.165716  | 3.536804  | -0.703517 | H                | 1.049201  | -3.749082    | -2.835038 |
| H | -1.197939 | 4.295666  | 0.706750  | C                | 1.287436  | -1.933680    | 1.398443  |
| C | -0.172613 | 2.674067  | 1.630234  | H                | 2.211380  | -2.442407    | 1.651479  |
| C | 1.344026  | 4.338214  | -0.188731 | N                | -1.055074 | -0.562234    | 0.768829  |
| H | -0.362297 | 4.129134  | -1.459486 | Pd               | 3.464785  | -0.534743    | -0.062292 |
| H | -0.926950 | 2.431758  | 2.387882  | C                | 2.742084  | -3.341405    | -0.779365 |
| H | 0.316942  | 1.737220  | 1.348290  | C                | 3.717495  | -2.229446    | -1.167389 |
| C | 0.853329  | 3.642149  | 2.209461  | H                | 2.993883  | -3.688907    | 0.226919  |
| C | 1.692654  | 4.341858  | 1.167112  | H                | 2.908980  | -4.205962    | -1.436967 |
| H | 0.329060  | 4.409127  | 2.797982  | H                | 3.615404  | -1.932896    | -2.216285 |
| H | 1.514053  | 3.113883  | 2.907925  | C                | 5.130427  | -2.631160    | -0.896651 |
| C | 2.836180  | 5.042342  | 1.567010  | O                | 5.472925  | -3.576076    | -0.219184 |
| C | 3.263267  | 5.735339  | -0.696356 | O                | 6.002131  | -1.793835    | -1.491115 |
| C | 0.645945  | 2.267992  | -1.364418 | C                | 7.377371  | -2.020057    | -1.172141 |
| C | 3.618465  | 5.732531  | 0.652239  | C                | 8.176036  | -0.910502    | -1.813063 |
| H | 3.112409  | 5.037239  | 2.619400  | H                | 7.674490  | -3.007759    | -1.542221 |
| H | 3.864620  | 6.275172  | -1.422493 | H                | 7.487557  | -2.029755    | -0.082828 |
| C | 1.707122  | 1.540438  | -0.830684 | H                | 9.241176  | -1.038436    | -1.593763 |
| C | 0.065425  | 1.778867  | -2.534576 | H                | 8.044800  | -0.911757    | -2.899778 |
| H | 4.503620  | 6.266421  | 0.987058  | H                | 7.857148  | 0.063835     | -1.429549 |
| N | 2.172920  | 0.405072  | -1.376128 | C                | 4.353437  | -0.009471    | 2.223621  |
| H | 2.218456  | 1.871074  | 0.068550  | O                | 3.625497  | 0.878256     | 1.705238  |
| H | -0.775743 | 2.305782  | -2.976493 | O                | 4.586955  | -1.101991    | 1.597140  |
| C | 1.641453  | -0.025676 | -2.525576 | C                | 4.986972  | 0.193506     | 3.568474  |
| H | 2.057008  | -0.930283 | -2.948169 | H                | 5.051692  | -0.754336    | 4.108093  |
| H | -2.365134 | -4.044636 | 3.364799  | H                | 6.006796  | 0.568426     | 3.426386  |
| H | -3.155494 | -5.432502 | -0.610221 | H                | 4.424796  | 0.931367     | 4.144484  |
| O | -3.237997 | -1.518540 | 2.862489  | 104              |           |              |           |
| O | -4.026616 | -3.011532 | -1.485308 | cis-T25-Q_C5_IN5 | Eopt      | -2905.020660 |           |
| C | -2.832507 | -1.740412 | 4.189973  | Pd               | -2.900620 | 0.448611     | 0.106955  |
| H | -1.773883 | -2.031344 | 4.246943  | C                | -4.230972 | 2.311217     | -1.565778 |
| H | -2.975748 | -0.791740 | 4.710767  | C                | -5.404846 | 0.307351     | -1.195094 |
| H | -3.442326 | -2.513330 | 4.675000  | C                | -5.226459 | 2.777975     | -2.414100 |
| C | -4.131480 | -4.037202 | -2.440186 | C                | -6.437142 | 0.716673     | -2.026734 |
| H | -4.525216 | -3.567960 | -3.343488 | H                | -5.099825 | 3.752799     | -2.872159 |
| H | -3.153413 | -4.487155 | -2.660717 | H                | -7.274185 | 0.044278     | -2.180958 |

|   |           |           |           |                  |           |              |           |
|---|-----------|-----------|-----------|------------------|-----------|--------------|-----------|
| N | -4.370289 | 1.121761  | -0.987599 | H                | -4.325852 | -5.283791    | -1.867913 |
| H | -7.136633 | 2.313384  | -3.289472 | C                | 2.058829  | 4.950222     | -0.952717 |
| C | -6.341663 | 1.969484  | -2.633794 | H                | 2.026984  | 4.752694     | -2.022106 |
| N | -4.142624 | -1.161165 | 0.169611  | C                | 0.998797  | 0.511268     | -3.028226 |
| N | -2.178017 | 2.381147  | -0.338758 | H                | 0.744660  | 0.103848     | -4.001383 |
| C | -5.310625 | -1.033337 | -0.514319 | C                | -0.527757 | -1.325678    | 0.338189  |
| C | -2.973566 | 3.049080  | -1.205411 | C                | -0.989260 | -0.211839    | 2.324150  |
| O | -6.214164 | -1.851386 | -0.622915 | C                | -0.979897 | -1.791897    | -0.919005 |
| O | -2.785197 | 4.176656  | -1.674923 | C                | 0.747973  | -1.718608    | 0.822774  |
| C | -3.823614 | -2.377735 | 0.778238  | C                | 0.224586  | -0.618796    | 2.897537  |
| C | -3.645536 | -2.445752 | 2.169464  | H                | -1.689762 | 0.401956     | 2.876824  |
| C | -3.591602 | -3.530664 | 0.008309  | C                | -0.178832 | -2.621507    | -1.659853 |
| C | -3.244507 | -3.635431 | 2.780034  | H                | -1.977786 | -1.528371    | -1.252567 |
| C | -3.208774 | -4.727917 | 0.615848  | C                | 1.621599  | -2.449487    | -0.041455 |
| C | -3.037472 | -4.763711 | 1.994253  | C                | 1.119996  | -1.314333    | 2.123462  |
| H | -2.733639 | -5.692614 | 2.468380  | H                | 0.463702  | -0.323174    | 3.912852  |
| C | -1.114320 | 3.215076  | 0.194420  | C                | 1.131422  | -2.924115    | -1.238930 |
| C | 0.088246  | 3.409073  | -0.758137 | H                | -0.544671 | -3.018573    | -2.602271 |
| H | -1.533940 | 4.228385  | 0.294119  | H                | 2.105589  | -1.555659    | 2.507003  |
| C | -0.626132 | 2.786981  | 1.563101  | N                | -1.325061 | -0.497081    | 1.080280  |
| C | 1.123679  | 4.319572  | -0.124095 | C                | 4.052189  | -2.498344    | -0.694406 |
| H | -0.323663 | 3.931192  | -1.629565 | Pd               | 3.893797  | -0.617311    | 0.262984  |
| H | -1.486966 | 2.538874  | 2.193775  | H                | 3.796293  | -2.356097    | -1.741040 |
| H | -0.005291 | 1.889341  | 1.479879  | C                | 5.383838  | -3.114191    | -0.453479 |
| C | 0.172964  | 3.917240  | 2.198904  | O                | 5.719783  | -3.691629    | 0.556538  |
| C | 1.163173  | 4.555286  | 1.255513  | O                | 6.172226  | -2.949222    | -1.523348 |
| H | -0.523299 | 4.693206  | 2.549246  | C                | 7.510363  | -3.443773    | -1.381105 |
| H | 0.701427  | 3.555423  | 3.089926  | C                | 8.257260  | -3.092021    | -2.644458 |
| C | 2.124139  | 5.436028  | 1.765037  | H                | 7.471220  | -4.524880    | -1.209848 |
| C | 3.009286  | 5.819835  | -0.437747 | H                | 7.960155  | -2.985073    | -0.494690 |
| C | 0.713907  | 2.133600  | -1.273165 | H                | 9.289747  | -3.449964    | -2.579005 |
| C | 3.036518  | 6.071031  | 0.934353  | H                | 7.787084  | -3.553797    | -3.518321 |
| H | 2.150197  | 5.620336  | 2.837245  | H                | 8.275600  | -2.008129    | -2.793392 |
| H | 3.721711  | 6.303647  | -1.099941 | O                | 5.212448  | 1.236577     | 0.223277  |
| C | 1.728206  | 1.462095  | -0.585430 | C                | 4.588224  | 1.697924     | 1.213501  |
| C | 0.334344  | 1.615912  | -2.511429 | O                | 3.625833  | 1.053104     | 1.742511  |
| H | 3.772955  | 6.751413  | 1.353279  | C                | 4.946499  | 3.055042     | 1.753189  |
| N | 2.357434  | 0.380985  | -1.068460 | H                | 6.028123  | 3.202943     | 1.709898  |
| H | 2.073251  | 1.800069  | 0.386978  | H                | 4.473991  | 3.817874     | 1.125398  |
| H | -0.459858 | 2.101795  | -3.072482 | H                | 4.582276  | 3.177212     | 2.774876  |
| C | 2.014508  | -0.064912 | -2.280597 | C                | 3.050756  | -2.568280    | 0.298031  |
| H | 2.569006  | -0.916349 | -2.659911 | H                | 3.331897  | -3.030966    | 1.243083  |
| H | -3.105399 | -3.693902 | 3.853006  | H                | 1.776335  | -3.521609    | -1.876906 |
| H | -3.033195 | -5.620500 | 0.027112  | H                | 4.907953  | -1.185668    | 1.241508  |
| O | -3.878648 | -1.289559 | 2.842013  | 96               |           |              |           |
| O | -3.733565 | -3.369625 | -1.328757 | cis-T25-Q_C5_TSI | Eopt      | -2767.361484 |           |
| C | -3.748925 | -1.316414 | 4.241592  | Pd               | -2.519801 | 0.630677     | 0.326145  |
| H | -2.721015 | -1.556551 | 4.549102  | C                | -3.766897 | 2.824090     | -0.976752 |
| H | -4.004983 | -0.312943 | 4.586846  | C                | -5.054948 | 0.858953     | -0.901727 |
| H | -4.436330 | -2.040158 | 4.697748  | C                | -4.747852 | 3.480524     | -1.708261 |
| C | -3.599056 | -4.508719 | -2.141267 | C                | -6.077005 | 1.458675     | -1.623259 |
| H | -3.797052 | -4.175233 | -3.161396 | H                | -4.569001 | 4.507652     | -2.006941 |
| H | -2.584866 | -4.928357 | -2.085640 | H                | -6.957841 | 0.870659     | -1.857631 |

|   |           |           |           |                   |           |              |           |
|---|-----------|-----------|-----------|-------------------|-----------|--------------|-----------|
| N | -3.967025 | 1.565626  | -0.595595 | H                 | -4.420159 | -4.647190    | -2.429120 |
| H | -6.701146 | 3.278506  | -2.588763 | C                 | 2.885941  | 4.588937     | -0.227153 |
| C | -5.916050 | 2.785990  | -2.022072 | H                 | 2.767931  | 4.634739     | -1.307699 |
| N | -3.861043 | -0.888095 | 0.164489  | C                 | 0.751567  | 1.170756     | -3.142556 |
| N | -1.693794 | 2.578935  | 0.187264  | H                 | 0.326355  | 1.052880     | -4.133712 |
| C | -5.035065 | -0.576855 | -0.447144 | C                 | -0.251357 | -1.284062    | 0.157438  |
| C | -2.456961 | 3.418198  | -0.545983 | C                 | -0.574986 | -0.512411    | 2.320868  |
| O | -5.995754 | -1.307147 | -0.648509 | C                 | -0.791839 | -1.579362    | -1.117077 |
| O | -2.196940 | 4.587166  | -0.854487 | C                 | 1.045377  | -1.759306    | 0.484298  |
| C | -3.624084 | -2.200269 | 0.583014  | C                 | 0.645360  | -1.059518    | 2.753332  |
| C | -3.427618 | -2.481274 | 1.944778  | H                 | -1.221742 | 0.018754     | 3.008507  |
| C | -3.503020 | -3.245335 | -0.349158 | C                 | -0.063074 | -2.324997    | -2.013995 |
| C | -3.115032 | -3.774020 | 2.368266  | H                 | -1.802434 | -1.258181    | -1.348431 |
| C | -3.208370 | -4.543700 | 0.070907  | C                 | 1.872437  | -2.348133    | -0.525044 |
| C | -3.015304 | -4.790316 | 1.424488  | H                 | 0.923415  | -0.981203    | 3.798786  |
| H | -2.779183 | -5.798456 | 1.752697  | H                 | -0.510510 | -2.596257    | -2.966647 |
| C | -0.554231 | 3.242887  | 0.799466  | C                 | 1.275959  | -2.669458    | -1.734950 |
| C | 0.617097  | 3.529732  | -0.175291 | H                 | 1.867630  | -3.163706    | -2.503406 |
| H | -0.897617 | 4.241419  | 1.111248  | Pd                | 3.596446  | -1.062206    | -0.773750 |
| C | -0.049555 | 2.524289  | 2.033035  | H                 | 2.855763  | -3.201814    | -0.073330 |
| C | 1.848253  | 4.051137  | 0.543417  | C                 | 6.292544  | -0.222293    | -0.659098 |
| H | 0.246198  | 4.317573  | -0.840721 | O                 | 7.317129  | 0.425325     | -0.725275 |
| H | -0.904402 | 2.244594  | 2.658858  | O                 | 5.111597  | 0.231742     | -0.988038 |
| H | 0.467143  | 1.603581  | 1.742673  | N                 | 5.030962  | -2.274266    | -0.113539 |
| C | 0.902628  | 3.422205  | 2.806457  | C                 | 4.827609  | -3.485830    | 0.335827  |
| C | 1.998934  | 3.976134  | 1.933135  | C                 | 5.977036  | -4.325086    | 0.823660  |
| H | 0.333664  | 4.255552  | 3.244911  | H                 | 6.722038  | -4.456815    | 0.031689  |
| H | 1.344010  | 2.877205  | 3.650343  | H                 | 5.603721  | -5.299636    | 1.138040  |
| C | 3.185419  | 4.437853  | 2.513891  | H                 | 6.481152  | -3.838422    | 1.665756  |
| C | 4.058602  | 5.042981  | 0.357605  | O                 | 3.662642  | -4.014607    | 0.388467  |
| C | 0.964902  | 2.355275  | -1.056584 | C                 | 6.350231  | -1.673840    | -0.166958 |
| C | 4.209974  | 4.965612  | 1.741449  | H                 | 7.013977  | -2.223938    | -0.847435 |
| H | 3.300790  | 4.371646  | 3.594001  | C                 | 1.483610  | -1.620280    | 1.820426  |
| H | 4.855204  | 5.445507  | -0.261039 | H                 | 2.466698  | -1.996506    | 2.089537  |
| C | 1.911815  | 1.401247  | -0.687705 | N                 | -0.981841 | -0.564570    | 1.066662  |
| C | 0.362796  | 2.209096  | -2.307094 | H                 | 6.832652  | -1.666879    | 0.818933  |
| H | 5.127140  | 5.307908  | 2.212367  |                   | 104       |              |           |
| N | 2.253541  | 0.372454  | -1.475545 | cis-T25-Q_C5_TSII | Eopt      | -2904.997429 |           |
| H | 2.436683  | 1.470964  | 0.259033  | Pd                | -2.817599 | 0.662423     | 0.338975  |
| H | -0.383368 | 2.933507  | -2.623303 | C                 | -3.852867 | 2.964055     | -0.962023 |
| C | 1.707140  | 0.273001  | -2.693452 | C                 | -5.312280 | 1.121571     | -0.902288 |
| H | 2.047671  | -0.552756 | -3.306184 | C                 | -4.764952 | 3.705757     | -1.701439 |
| H | -2.961918 | -3.997130 | 3.417455  | C                 | -6.268856 | 1.809703     | -1.634354 |
| H | -3.117547 | -5.353539 | -0.643208 | H                 | -4.493544 | 4.714220     | -1.993842 |
| O | -3.554811 | -1.419077 | 2.781057  | H                 | -7.195428 | 1.301939     | -1.879735 |
| O | -3.658141 | -2.883683 | -1.645088 | N                 | -4.169260 | 1.729012     | -0.583177 |
| C | -3.412725 | -1.658617 | 4.159067  | H                 | -6.718633 | 3.678516     | -2.603403 |
| H | -2.404552 | -2.021284 | 4.405905  | C                 | -5.986452 | 3.117837     | -2.029215 |
| H | -3.582867 | -0.698785 | 4.650488  | N                 | -4.287974 | -0.725921    | 0.169474  |
| H | -4.151574 | -2.384563 | 4.521573  | N                 | -1.811535 | 2.532517     | 0.206344  |
| C | -3.636540 | -3.902161 | -2.614362 | C                 | -5.423986 | -0.311637    | -0.451770 |
| H | -3.827074 | -3.411144 | -3.570177 | C                 | -2.505002 | 3.445210     | -0.506726 |
| H | -2.660250 | -4.405157 | -2.651279 | O                 | -6.443065 | -0.954413    | -0.665008 |

|   |           |           |           |                         |              |           |           |
|---|-----------|-----------|-----------|-------------------------|--------------|-----------|-----------|
| O | -2.163386 | 4.604662  | -0.771274 | C                       | 0.685689     | -1.730231 | 0.318695  |
| C | -4.165830 | -2.054983 | 0.583293  | C                       | 0.314835     | -1.222905 | 2.641629  |
| C | -4.013597 | -2.358225 | 1.945559  | H                       | -1.589156    | -0.243918 | 3.018363  |
| C | -4.113917 | -3.100581 | -0.354303 | C                       | -0.490194    | -2.160742 | -2.187255 |
| C | -3.820642 | -3.675356 | 2.365804  | H                       | -2.261481    | -1.254968 | -1.380384 |
| C | -3.934978 | -4.421486 | 0.061407  | C                       | 1.477156     | -2.172536 | -0.781020 |
| C | -3.790201 | -4.691228 | 1.416802  | H                       | 0.624144     | -1.206591 | 3.681044  |
| H | -3.648194 | -5.717840 | 1.742314  | H                       | -0.949632    | -2.379064 | -3.147637 |
| C | -0.656297 | 3.104889  | 0.881484  | C                       | 0.874212     | -2.458676 | -1.985557 |
| C | 0.540471  | 3.440912  | -0.043597 | H                       | 1.469484     | -2.833062 | -2.815529 |
| H | -0.970144 | 4.084212  | 1.277344  | C                       | 1.163284     | -1.651812 | 1.647964  |
| C | -0.194173 | 2.260608  | 2.049133  | H                       | 2.184354     | -1.955363 | 1.875671  |
| C | 1.753224  | 3.900646  | 0.746330  | N                       | -1.370278    | -0.673871 | 1.035710  |
| H | 0.195061  | 4.277050  | -0.660943 | Pd                      | 3.340012     | -1.330940 | -0.865005 |
| H | -1.066456 | 1.956266  | 2.637292  | C                       | 3.107782     | -3.539393 | -0.327687 |
| H | 0.288166  | 1.351033  | 1.677943  | C                       | 4.416696     | -3.018287 | -0.257588 |
| C | 0.776132  | 3.042995  | 2.919441  | H                       | 2.597978     | -3.771680 | 0.602191  |
| C | 1.884920  | 3.681054  | 2.122480  | H                       | 2.838741     | -4.150797 | -1.181627 |
| H | 0.223468  | 3.830145  | 3.453691  | H                       | 5.128118     | -3.191222 | -1.060386 |
| H | 1.204424  | 2.393297  | 3.693293  | C                       | 4.959854     | -2.613061 | 1.059710  |
| C | 3.060178  | 4.084982  | 2.766292  | O                       | 4.298091     | -2.521912 | 2.080158  |
| C | 3.955619  | 4.926888  | 0.700636  | O                       | 6.260330     | -2.343972 | 0.979136  |
| C | 0.930779  | 2.336657  | -0.997862 | C                       | 6.849963     | -1.708361 | 2.124386  |
| C | 4.090178  | 4.700987  | 2.070187  | C                       | 6.500057     | -0.235191 | 2.156450  |
| H | 3.160438  | 3.905866  | 3.835060  | H                       | 7.922514     | -1.866848 | 1.993111  |
| H | 4.752913  | 5.408876  | 0.141875  | H                       | 6.515967     | -2.224420 | 3.029118  |
| C | 1.832052  | 1.330946  | -0.646390 | H                       | 7.076979     | 0.269064  | 2.939331  |
| C | 0.446293  | 2.325839  | -2.306075 | H                       | 6.716550     | 0.227584  | 1.189927  |
| H | 4.995717  | 5.001850  | 2.589840  | H                       | 5.436074     | -0.097357 | 2.366444  |
| N | 2.247048  | 0.393126  | -1.504351 | C                       | 5.437871     | -0.235046 | -2.268745 |
| H | 2.255299  | 1.284076  | 0.351787  | O                       | 4.825203     | -0.813029 | -3.171273 |
| H | -0.269854 | 3.085330  | -2.610343 | O                       | 5.096042     | -0.245470 | -1.021003 |
| C | 1.828210  | 0.431153  | -2.775541 | C                       | 6.692536     | 0.567951  | -2.549345 |
| H | 2.257678  | -0.313026 | -3.436545 | H                       | 7.528846     | 0.161121  | -1.971503 |
| H | -3.705644 | -3.916131 | 3.416012  | H                       | 6.931407     | 0.542437  | -3.613762 |
| H | -3.900710 | -5.232128 | -0.656805 | H                       | 6.548413     | 1.603770  | -2.225303 |
| O | -4.057717 | -1.292447 | 2.786295  |                         |              |           |           |
| O | -4.218538 | -2.718802 | -1.649197 | 104                     |              |           |           |
| C | -3.975005 | -1.551235 | 4.165697  | cis-T25-Q_C5_TSIII Eopt | -2905.000322 |           |           |
| H | -3.011483 | -2.006155 | 4.436898  | Pd                      | -2.993250    | 0.244442  | 0.187807  |
| H | -4.069357 | -0.582378 | 4.659740  | C                       | -4.401517    | 2.113905  | -1.420790 |
| H | -4.786639 | -2.208462 | 4.502938  | C                       | -5.295039    | -0.060293 | -1.421471 |
| C | -4.199119 | -3.724683 | -2.631128 | C                       | -5.374698    | 2.551458  | -2.309688 |
| H | -4.318464 | -3.212765 | -3.587517 | C                       | -6.294146    | 0.311771  | -2.308989 |
| H | -3.247233 | -4.273590 | -2.627438 | H                       | -5.355786    | 3.588530  | -2.626315 |
| H | -5.026245 | -4.432894 | -2.496483 | H                       | -7.006370    | -0.440706 | -2.630031 |
| C | 2.796264  | 4.526435  | 0.053188  | N                       | -4.409568    | 0.848580  | -1.013106 |
| H | 2.689837  | 4.688012  | -1.017479 | H                       | -7.102592    | 1.952486  | -3.443954 |
| C | 0.913852  | 1.378841  | -3.209526 | C                       | -6.329642    | 1.635148  | -2.749757 |
| H | 0.584053  | 1.375112  | -4.243297 | N                       | -4.008923    | -1.498212 | -0.046577 |
| C | -0.647656 | -1.305871 | 0.057600  | N                       | -2.472556    | 2.297810  | -0.013451 |
| C | -0.939621 | -0.703172 | 2.282230  | C                       | -5.087284    | -1.447253 | -0.872745 |
| C | -1.225984 | -1.530936 | -1.212723 | C                       | -3.304620    | 2.962419  | -0.846052 |
|   |           |           |           | O                       | -5.842147    | -2.359126 | -1.181477 |

|   |           |           |           |                  |           |              |           |
|---|-----------|-----------|-----------|------------------|-----------|--------------|-----------|
| O | -3.254375 | 4.158825  | -1.154859 | C                | 0.788450  | -1.426464    | 1.396705  |
| C | -3.603959 | -2.725200 | 0.486749  | C                | -0.299845 | -0.688604    | 3.420589  |
| C | -3.639629 | -2.939162 | 1.873681  | H                | -2.322910 | 0.037351     | 3.105936  |
| C | -3.083718 | -3.733761 | -0.342637 | C                | 0.450952  | -2.261826    | -1.249784 |
| C | -3.161926 | -4.129984 | 2.423898  | H                | -1.554810 | -1.505444    | -1.112475 |
| C | -2.619761 | -4.933210 | 0.200786  | C                | 1.917333  | -1.880587    | 0.640911  |
| C | -2.662860 | -5.114099 | 1.577684  | C                | 0.828767  | -1.139095    | 2.778409  |
| H | -2.297616 | -6.044557 | 2.002908  | H                | -0.310534 | -0.509331    | 4.490031  |
| C | -1.528247 | 3.182275  | 0.653222  | C                | 1.720137  | -2.344319    | -0.643761 |
| C | -0.406369 | 3.735597  | -0.264868 | H                | 0.330528  | -2.625576    | -2.265781 |
| H | -2.088879 | 4.079700  | 0.959572  | H                | 1.736253  | -1.312125    | 3.347748  |
| C | -0.912930 | 2.569239  | 1.893487  | N                | -1.486929 | -0.594600    | 1.352226  |
| C | 0.525970  | 4.644045  | 0.509919  | C                | 4.492699  | -1.850887    | 0.459118  |
| H | -0.921742 | 4.334375  | -1.023772 | Pd               | 3.827157  | -0.013336    | -0.319997 |
| H | -1.702690 | 2.108248  | 2.493123  | H                | 4.517896  | -2.468628    | -0.434140 |
| H | -0.209257 | 1.776781  | 1.609314  | C                | 5.746254  | -1.708751    | 1.228498  |
| C | -0.210076 | 3.638563  | 2.719532  | H                | 3.161117  | 0.063773     | 1.132281  |
| C | 0.657503  | 4.562251  | 1.901269  | O                | 5.821190  | -1.300740    | 2.370996  |
| H | -0.971463 | 4.245042  | 3.232050  | O                | 6.801558  | -2.073768    | 0.491965  |
| H | 0.388957  | 3.173412  | 3.512898  | C                | 8.080345  | -1.883433    | 1.107526  |
| C | 1.588118  | 5.386025  | 2.544803  | C                | 9.128108  | -2.250956    | 0.085040  |
| C | 2.236198  | 6.367889  | 0.447708  | H                | 8.139703  | -2.509616    | 2.004427  |
| C | 0.364202  | 2.659360  | -0.991801 | H                | 8.165325  | -0.839809    | 1.427760  |
| C | 2.374487  | 6.280578  | 1.832602  | H                | 10.128422 | -2.119231    | 0.509977  |
| H | 1.691044  | 5.317564  | 3.626089  | H                | 9.019456  | -3.294211    | -0.227131 |
| H | 2.842592  | 7.066114  | -0.122293 | H                | 9.041165  | -1.614615    | -0.801085 |
| C | 1.585321  | 2.175216  | -0.522907 | O                | 4.970437  | 0.006588     | -2.039168 |
| C | -0.118640 | 2.121257  | -2.186691 | C                | 4.854716  | -1.000454    | -2.832332 |
| H | 3.093193  | 6.907705  | 2.352870  | O                | 4.016285  | -1.906947    | -2.732799 |
| N | 2.297715  | 1.236391  | -1.160696 | C                | 5.877070  | -1.018926    | -3.952665 |
| H | 2.020848  | 2.564861  | 0.390798  | H                | 6.841178  | -1.341118    | -3.542785 |
| H | -1.060353 | 2.481195  | -2.591153 | H                | 5.574401  | -1.717604    | -4.734766 |
| C | 1.827803  | 0.733674  | -2.312789 | H                | 6.016469  | -0.016341    | -4.365456 |
| H | 2.429227  | -0.040899 | -2.778177 | C                | 3.277382  | -1.560166    | 1.147917  |
| H | -3.186437 | -4.301636 | 3.493476  | H                | 3.407576  | -1.416060    | 2.219832  |
| H | -2.219541 | -5.714894 | -0.433858 | H                | 2.566439  | -2.640071    | -1.256841 |
| O | -4.150764 | -1.916392 | 2.606430  | 96               |           |              |           |
| O | -3.043898 | -3.431476 | -1.661447 | cis-T25-Q_C6_IN2 | Eopt      | -2767.374937 |           |
| C | -4.249873 | -2.102334 | 3.996396  | Pd               | -2.698699 | 0.552037     | 0.058815  |
| H | -3.261542 | -2.237298 | 4.459075  | C                | -3.306157 | 2.623854     | -1.786030 |
| H | -4.712862 | -1.195196 | 4.389458  | C                | -4.622366 | 0.686232     | -2.000427 |
| H | -4.880889 | -2.965005 | 4.245138  | C                | -3.960439 | 3.226950     | -2.852335 |
| C | -2.589740 | -4.426161 | -2.546683 | C                | -5.312812 | 1.230103     | -3.073550 |
| H | -2.669773 | -3.997004 | -3.546722 | H                | -3.657028 | 4.225762     | -3.146419 |
| H | -1.543281 | -4.695919 | -2.348955 | H                | -6.081760 | 0.632030     | -3.550641 |
| H | -3.212926 | -5.327198 | -2.489465 | N                | -3.670542 | 1.403682     | -1.403452 |
| C | 1.319149  | 5.552610  | -0.199623 | H                | -5.503893 | 2.967997     | -4.329291 |
| H | 1.212281  | 5.606350  | -1.280954 | C                | -4.976421 | 2.517826     | -3.493088 |
| C | 0.621206  | 1.154323  | -2.853541 | N                | -3.982267 | -0.938426    | -0.400734 |
| H | 0.274239  | 0.723508  | -3.787149 | N                | -1.697715 | 2.433497     | -0.026901 |
| C | -0.443873 | -1.210806 | 0.717061  | C                | -4.811639 | -0.704794    | -1.450192 |
| C | -1.438561 | -0.397703 | 2.655647  | C                | -2.188400 | 3.236541     | -0.991127 |
| C | -0.596922 | -1.638714 | -0.620689 | O                | -5.625623 | -1.468803    | -1.950683 |

O -1.821560 4.386985 -1.270956  
 C -3.897503 -2.217966 0.155445  
 C -4.391835 -2.465937 1.444424  
 C -3.223584 -3.244808 -0.525639  
 C -4.231180 -3.719436 2.038787  
 C -3.061749 -4.501164 0.061616  
 C -3.571179 -4.721424 1.336020  
 H -3.448497 -5.698430 1.794853  
 C -0.732051 3.089661 0.843698  
 C 0.605439 3.490893 0.155771  
 H -1.171188 4.053945 1.148083  
 C -0.473494 2.289300 2.103394  
 C 1.665010 3.928330 1.153494  
 H 0.345811 4.358017 -0.459878  
 H -1.433778 1.984410 2.528095  
 H 0.086174 1.379250 1.859936  
 C 0.298053 3.115222 3.117636  
 C 1.541155 3.730464 2.533112  
 H -0.353012 3.916680 3.498260  
 H 0.561274 2.498344 3.986032  
 C 2.582526 4.135143 3.376298  
 C 3.850735 4.936479 1.499200  
 C 1.178457 2.473658 -0.807419  
 C 3.729704 4.731306 2.873315  
 H 2.481500 3.972746 4.447713  
 H 4.742377 5.401234 1.088313  
 C 2.101580 1.506687 -0.413104  
 C 0.864531 2.536731 -2.166711  
 H 4.528094 5.032719 3.545797  
 N 2.708484 0.683757 -1.279204  
 H 2.377782 1.388972 0.628846  
 H 0.136858 3.270609 -2.504757  
 C 2.448783 0.795040 -2.589039  
 H 3.011826 0.140640 -3.245307  
 H -4.615687 -3.921787 3.031502  
 H -2.545567 -5.299264 -0.458699  
 O -4.996176 -1.409921 2.047572  
 O -2.740954 -2.904826 -1.745029  
 C -5.573852 -1.629778 3.310710  
 H -4.818513 -1.903955 4.061286  
 H -6.040653 -0.685598 3.596784  
 H -6.339766 -2.414838 3.273164  
 C -2.015371 -3.879709 -2.454198  
 H -1.719605 -3.409027 -3.393299  
 H -1.117190 -4.190560 -1.903386  
 H -2.631892 -4.760739 -2.672368  
 C 2.824795 4.536830 0.656007  
 H 2.920066 4.686153 -0.417388  
 C 1.513090 1.699367 -3.066595  
 H 1.313122 1.753952 -4.131631  
 C -0.465550 -1.045199 1.090186  
 C -1.944359 -0.490861 2.792626  
 C -0.242782 -1.281600 -0.284956

C 0.580696 -1.286577 2.021880  
 C -1.014509 -0.858956 3.779962  
 H -2.926219 -0.108450 3.050285  
 H -1.083565 -1.227592 -0.971139  
 C 1.896295 -1.486662 1.522112  
 C 0.261335 -1.200676 3.394688  
 H -1.296669 -0.804901 4.825876  
 H 1.033265 -1.400217 4.133906  
 N -1.663270 -0.542324 1.503127  
 H 2.713108 -1.525477 2.241345  
 Pd 3.881272 -0.914310 -0.679252  
 C 6.636766 -0.761785 -1.416811  
 O 7.726628 -0.457543 -1.865187  
 O 5.524674 -0.126094 -1.606025  
 N 5.183353 -2.404011 -0.228834  
 C 4.916264 -3.597387 0.171805  
 C 5.943994 -4.658463 0.404452  
 H 6.752067 -4.284170 1.039688  
 H 6.390145 -4.969383 -0.546783  
 H 5.476736 -5.523742 0.875517  
 O 3.680576 -3.989289 0.409380  
 C 6.557938 -2.006052 -0.512746  
 C 2.149655 -1.534498 0.164608  
 H 7.118433 -2.810003 -1.000387  
 C 1.024627 -1.565568 -0.715088  
 H 1.190159 -1.728036 -1.777241  
 H 7.075945 -1.762067 0.424462  
 H 3.079375 -3.211881 0.255256  
 104  
 cis-T25-Q\_C6\_IN3 Eopt -2905.007837  
 Pd 2.836782 -0.549321 0.140215  
 C 3.559267 -2.892407 -1.292933  
 C 4.778452 -0.963830 -1.863830  
 C 4.251219 -3.648075 -2.230615  
 C 5.503290 -1.660588 -2.819395  
 H 4.000335 -4.698050 -2.334330  
 H 6.244807 -1.122612 -3.400185  
 N 3.858732 -1.605738 -1.143230  
 H 5.790498 -3.588354 -3.733146  
 C 5.234991 -3.018936 -2.993349  
 N 4.048974 0.893310 -0.587945  
 N 1.925728 -2.464407 0.401268  
 C 4.894388 0.512255 -1.580094  
 C 2.467168 -3.404556 -0.397722  
 O 5.671571 1.211270 -2.215888  
 O 2.162369 -4.604386 -0.461802  
 C 3.893718 2.248465 -0.282776  
 C 4.357245 2.758933 0.938643  
 C 3.181280 3.094230 -1.148692  
 C 4.129346 4.092745 1.284421  
 C 2.952849 4.429639 -0.810821  
 C 3.433700 4.911062 0.401294  
 H 3.260450 5.950412 0.665879



|   |           |           |           |                  |           |              |           |
|---|-----------|-----------|-----------|------------------|-----------|--------------|-----------|
| C | 0.981726  | -3.000017 | 1.373140  | N                | 1.741776  | 0.735893     | 1.366263  |
| C | -0.326503 | -3.586750 | 0.766667  | H                | -2.703492 | 1.489296     | 1.921198  |
| H | 1.463685  | -3.869912 | 1.848955  | C                | -2.088113 | 1.240708     | -0.127064 |
| C | 0.665200  | -1.998559 | 2.463945  | C                | -0.972311 | 1.202504     | -1.005577 |
| C | -1.359508 | -3.915057 | 1.830838  | H                | -1.138447 | 1.171224     | -2.079618 |
| H | -0.013016 | -4.527562 | 0.302741  | Pd               | -3.792993 | 0.540600     | -0.862837 |
| H | 1.601870  | -1.569165 | 2.828917  | C                | -4.448792 | 2.447627     | -1.666922 |
| H | 0.061329  | -1.181192 | 2.054711  | C                | -5.028247 | 2.283028     | -0.421917 |
| C | -0.074061 | -2.663973 | 3.611808  | H                | -3.593153 | 3.106873     | -1.777472 |
| C | -1.265307 | -3.460194 | 3.150602  | H                | -4.926041 | 2.085792     | -2.573101 |
| H | 0.617529  | -3.334816 | 4.143588  | H                | -5.988598 | 1.786137     | -0.311468 |
| H | -0.390800 | -1.910727 | 4.344142  | C                | -4.553150 | 3.004282     | 0.790002  |
| C | -2.284182 | -3.778751 | 4.056106  | O                | -4.917706 | 2.733619     | 1.914144  |
| C | -3.468461 | -5.003220 | 2.361478  | O                | -3.682580 | 3.975529     | 0.491268  |
| C | -0.953481 | -2.778879 | -0.349600 | C                | -3.105359 | 4.677495     | 1.600890  |
| C | -3.378999 | -4.540037 | 3.673965  | C                | -4.002719 | 5.806312     | 2.058949  |
| H | -2.207682 | -3.415588 | 5.079171  | H                | -2.149095 | 5.044517     | 1.221278  |
| H | -4.317809 | -5.602759 | 2.046371  | H                | -2.919765 | 3.966806     | 2.410575  |
| C | -1.962076 | -1.842439 | -0.128907 | H                | -3.509538 | 6.376234     | 2.853761  |
| C | -0.591848 | -3.022350 | -1.677228 | H                | -4.221260 | 6.488306     | 1.231336  |
| H | -4.160753 | -4.770798 | 4.392366  | H                | -4.943385 | 5.410866     | 2.451544  |
| N | -2.604833 | -1.215247 | -1.124760 | C                | -5.603128 | -0.478994    | -2.838890 |
| H | -2.275972 | -1.591777 | 0.878917  | O                | -4.743425 | -0.042615    | -3.619168 |
| H | 0.196967  | -3.741957 | -1.883027 | O                | -5.559505 | -0.364466    | -1.557013 |
| C | -2.288593 | -1.493856 | -2.399460 | C                | -6.811575 | -1.229294    | -3.362539 |
| H | -2.885367 | -0.986280 | -3.153986 | H                | -6.918867 | -1.076652    | -4.438048 |
| H | 4.490174  | 4.497263  | 2.222745  | H                | -6.677650 | -2.299256    | -3.166515 |
| H | 2.408465  | 5.089180  | -1.476310 | H                | -7.718451 | -0.915169    | -2.838568 |
| O | 5.002842  | 1.866931  | 1.733092  | 104              |           |              |           |
| O | 2.730739  | 2.506686  | -2.283204 | cis-T25-Q_C6_IN4 | Eopt      | -2905.057606 |           |
| C | 5.544612  | 2.347521  | 2.938422  | Pd               | -2.857664 | 0.607287     | 0.055282  |
| H | 4.762381  | 2.718531  | 3.616288  | C                | -3.793674 | 2.524516     | -1.814084 |
| H | 6.050133  | 1.498075  | 3.401176  | C                | -4.945211 | 0.473352     | -1.842494 |
| H | 6.273113  | 3.149256  | 2.762509  | C                | -4.590602 | 3.026092     | -2.834560 |
| C | 1.968361  | 3.292451  | -3.167080 | C                | -5.775109 | 0.913165     | -2.863825 |
| H | 1.704838  | 2.637632  | -3.999272 | H                | -4.403657 | 4.033658     | -3.189646 |
| H | 1.050690  | 3.659243  | -2.687306 | H                | -6.529641 | 0.233963     | -3.245833 |
| H | 2.545599  | 4.144173  | -3.548212 | N                | -4.008975 | 1.292016     | -1.363827 |
| C | -2.465410 | -4.689482 | 1.456672  | H                | -6.231166 | 2.575673     | -4.152500 |
| H | -2.535212 | -5.040552 | 0.429229  | C                | -5.592778 | 2.206532     | -3.354767 |
| C | -1.269312 | -2.383471 | -2.707476 | N                | -4.042201 | -1.016338    | -0.236842 |
| H | -1.027103 | -2.578971 | -3.747098 | N                | -2.035844 | 2.534181     | -0.193675 |
| C | 0.520781  | 1.085271  | 0.870113  | C                | -4.968727 | -0.901026    | -1.223089 |
| C | 2.007677  | 0.917258  | 2.646855  | C                | -2.655102 | 3.251099     | -1.155573 |
| C | 0.304727  | 1.078293  | -0.526070 | O                | -5.755135 | -1.749279    | -1.622517 |
| C | -0.554400 | 1.394859  | 1.747104  | O                | -2.374450 | 4.394006     | -1.537696 |
| C | 1.041021  | 1.380654  | 3.556371  | C                | -3.803012 | -2.259989    | 0.354727  |
| H | 3.007564  | 0.645821  | 2.968139  | C                | -4.086806 | -2.463662    | 1.714044  |
| H | 1.156483  | 0.966611  | -1.191373 | C                | -3.174251 | -3.287249    | -0.369275 |
| C | -1.873662 | 1.411972  | 1.221036  | C                | -3.742654 | -3.662303    | 2.342334  |
| C | -0.250277 | 1.558925  | 3.116833  | C                | -2.840463 | -4.493115    | 0.250081  |
| H | 1.310742  | 1.519985  | 4.597733  | C                | -3.126380 | -4.662810    | 1.599284  |
| H | -1.046840 | 1.817188  | 3.810593  | H                | -2.861925 | -5.598050    | 2.084500  |

|   |           |           |           |                  |           |              |           |
|---|-----------|-----------|-----------|------------------|-----------|--------------|-----------|
| C | -0.976412 | 3.261488  | 0.484298  | C                | 1.525023  | -2.689424    | 0.374430  |
| C | 0.263081  | 3.523601  | -0.410176 | H                | 0.698882  | -2.487476    | -1.616012 |
| H | -1.362670 | 4.266353  | 0.717762  | H                | 0.568623  | -1.822510    | 4.257446  |
| C | -0.550751 | 2.606870  | 1.783265  | N                | -1.719521 | -0.312315    | 1.525763  |
| C | 1.381347  | 4.193214  | 0.363273  | H                | 2.028500  | -2.768639    | 2.449032  |
| H | -0.084304 | 4.214867  | -1.185532 | Pd               | 3.675028  | -0.559170    | -0.053184 |
| H | -1.441344 | 2.361640  | 2.368972  | C                | 2.799884  | -3.314364    | -0.118594 |
| H | -0.029332 | 1.664442  | 1.575261  | C                | 3.527677  | -2.338099    | -1.033489 |
| C | 0.344436  | 3.543196  | 2.582222  | H                | 2.591034  | -4.251238    | -0.659401 |
| C | 1.445837  | 4.163138  | 1.760583  | H                | 2.985807  | -2.168562    | -1.966677 |
| H | -0.272775 | 4.350325  | 3.004576  | C                | 4.924343  | -2.751884    | -1.338766 |
| H | 0.778043  | 3.012021  | 3.438512  | O                | 5.566466  | -3.584876    | -0.736794 |
| C | 2.542412  | 4.750048  | 2.401420  | O                | 5.415342  | -2.063032    | -2.392673 |
| C | 3.487992  | 5.399496  | 0.288519  | C                | 6.787613  | -2.317028    | -2.698555 |
| C | 0.767732  | 2.291702  | -1.123598 | C                | 7.172397  | -1.402342    | -3.836909 |
| C | 3.557761  | 5.361587  | 1.680700  | H                | 6.908426  | -3.373889    | -2.961732 |
| H | 2.594393  | 4.717004  | 3.487800  | H                | 7.391059  | -2.132919    | -1.803274 |
| H | 4.274708  | 5.877062  | -0.288706 | H                | 8.221943  | -1.558191    | -4.107248 |
| C | 1.778802  | 1.495821  | -0.587797 | H                | 6.556307  | -1.598156    | -4.720410 |
| C | 0.276237  | 1.937658  | -2.381209 | H                | 7.040410  | -0.354075    | -3.550870 |
| H | 4.403250  | 5.804578  | 2.199654  | C                | 4.935364  | -0.044890    | 2.035044  |
| N | 2.301180  | 0.437685  | -1.229203 | O                | 4.964533  | -1.181313    | 1.446140  |
| H | 2.222546  | 1.726403  | 0.376971  | O                | 4.232734  | 0.892234     | 1.569574  |
| H | -0.507396 | 2.537944  | -2.835644 | C                | 5.777139  | 0.151463     | 3.261125  |
| C | 1.854474  | 0.138630  | -2.455135 | H                | 5.837027  | -0.775770    | 3.835831  |
| H | 2.340621  | -0.684968 | -2.963672 | H                | 6.793301  | 0.422193     | 2.953090  |
| H | -3.955888 | -3.824900 | 3.392130  | H                | 5.372927  | 0.961926     | 3.870972  |
| H | -2.353353 | -5.288208 | -0.301682 | H                | 3.455547  | -3.570745    | 0.718394  |
| O | -4.683870 | -1.420704 | 2.345228  | 104              |           |              |           |
| O | -2.899217 | -2.995620 | -1.662632 | cis-T25-Q_C6_IN5 | Eopt      | -2905.025296 |           |
| C | -5.017317 | -1.589714 | 3.700222  | Pd               | -2.958359 | 0.543663     | -0.100555 |
| H | -4.123864 | -1.752676 | 4.319867  | C                | -3.636494 | 2.194135     | -2.300279 |
| H | -5.507094 | -0.663860 | 4.007678  | C                | -4.794319 | 0.147095     | -2.206863 |
| H | -5.710033 | -2.428665 | 3.844624  | C                | -4.303811 | 2.558028     | -3.462447 |
| C | -2.290470 | -3.996931 | -2.439310 | C                | -5.492521 | 0.448493     | -3.367279 |
| H | -2.175267 | -3.573646 | -3.438663 | H                | -4.068493 | 3.514287     | -3.916771 |
| H | -1.302938 | -4.269671 | -2.042316 | H                | -6.200168 | -0.279044    | -3.750004 |
| H | -2.916823 | -4.895945 | -2.498989 | N                | -3.914526 | 1.026506     | -1.728756 |
| C | 2.406727  | 4.817416  | -0.356212 | H                | -5.779171 | 1.933232     | -4.898890 |
| H | 2.349233  | 4.833326  | -1.442715 | C                | -5.243157 | 1.671928     | -3.990836 |
| C | 0.832919  | 0.858064  | -3.056313 | N                | -4.108364 | -1.110952    | -0.319601 |
| H | 0.497451  | 0.582848  | -4.051020 | N                | -2.064063 | 2.409855     | -0.509432 |
| C | -0.693378 | -1.134650 | 1.159229  | C                | -4.894135 | -1.140318    | -1.427525 |
| C | -1.968452 | -0.104761 | 2.806095  | C                | -2.572638 | 3.002396     | -1.611217 |
| C | -0.499632 | -1.458018 | -0.201322 | O                | -5.611178 | -2.051092    | -1.818842 |
| C | 0.187614  | -1.680163 | 2.135095  | O                | -2.243945 | 4.091120     | -2.098335 |
| C | -1.179464 | -0.651328 | 3.830892  | C                | -3.913065 | -2.274115    | 0.430775  |
| H | -2.815439 | 0.533234  | 3.030981  | C                | -4.386250 | -2.357392    | 1.749090  |
| C | 0.560717  | -2.241903 | -0.566285 | C                | -3.141226 | -3.330411    | -0.082167 |
| H | -1.213332 | -1.095815 | -0.934974 | C                | -4.101223 | -3.473384    | 2.538866  |
| C | 1.307916  | -2.432251 | 1.707570  | C                | -2.861265 | -4.453235    | 0.698797  |
| C | -0.087489 | -1.414126 | 3.493104  | C                | -3.345993 | -4.508955    | 2.000121  |
| H | -1.428097 | -0.438893 | 4.865100  | H                | -3.128013 | -5.380382    | 2.610965  |

|   |           |           |           |                  |           |              |           |
|---|-----------|-----------|-----------|------------------|-----------|--------------|-----------|
| C | -1.061996 | 3.211987  | 0.173994  | C                | 1.658061  | -2.029391    | 1.149459  |
| C | 0.255539  | 3.380789  | -0.627554 | H                | 1.022512  | -2.294808    | -0.908330 |
| H | -1.461161 | 4.235753  | 0.255517  | H                | 0.091309  | -0.892772    | 4.769668  |
| C | -0.750852 | 2.717025  | 1.572532  | N                | -2.025025 | -0.135879    | 1.620754  |
| C | 1.265750  | 4.197803  | 0.151602  | H                | 1.905523  | -1.780910    | 3.262192  |
| H | -0.028045 | 3.958804  | -1.513625 | Pd               | 4.071151  | -0.673089    | 0.253054  |
| H | -1.685927 | 2.519804  | 2.103852  | C                | 3.054860  | -2.415907    | 0.934680  |
| H | -0.198324 | 1.771127  | 1.518515  | C                | 3.646415  | -2.660794    | -0.324625 |
| C | 0.056171  | 3.757925  | 2.336659  | H                | 3.590359  | -2.795673    | 1.802486  |
| C | 1.191905  | 4.349741  | 1.540481  | H                | 3.065829  | -2.630295    | -1.241927 |
| H | -0.615301 | 4.575676  | 2.638145  | C                | 4.887524  | -3.470755    | -0.405671 |
| H | 0.443655  | 3.325734  | 3.267779  | O                | 5.483901  | -3.948380    | 0.533705  |
| C | 2.169347  | 5.109569  | 2.192951  | O                | 5.267491  | -3.608521    | -1.684740 |
| C | 3.264648  | 5.576779  | 0.103634  | C                | 6.499690  | -4.312543    | -1.884073 |
| C | 0.855485  | 2.090255  | -1.138692 | C                | 6.796542  | -4.291416    | -3.363792 |
| C | 3.195987  | 5.722890  | 1.489611  | H                | 6.391595  | -5.331868    | -1.498066 |
| H | 2.112935  | 5.221006  | 3.273912  | H                | 7.283295  | -3.819903    | -1.299507 |
| H | 4.061787  | 6.052595  | -0.460820 | H                | 7.734555  | -4.819219    | -3.563777 |
| C | 1.862596  | 1.398542  | -0.459401 | H                | 5.998136  | -4.781337    | -3.930033 |
| C | 0.462829  | 1.586047  | -2.380303 | H                | 6.895519  | -3.262708    | -3.723590 |
| H | 3.941869  | 6.311448  | 2.016890  | C                | 5.223909  | 1.636803     | 0.463627  |
| N | 2.469971  | 0.313496  | -0.957873 | O                | 5.533094  | 0.928129     | -0.527086 |
| H | 2.241395  | 1.742309  | 0.499189  | O                | 4.374409  | 1.233162     | 1.323101  |
| H | -0.307674 | 2.104374  | -2.944976 | C                | 5.860880  | 2.984698     | 0.670740  |
| C | 2.114338  | -0.125123 | -2.169696 | H                | 6.502347  | 2.942424     | 1.557511  |
| H | 2.672188  | -0.971493 | -2.560031 | H                | 6.459723  | 3.267712     | -0.196402 |
| H | -4.465208 | -3.545980 | 3.556862  | H                | 5.085582  | 3.731932     | 0.858565  |
| H | -2.268241 | -5.271888 | 0.308732  | H                | 5.215514  | -1.237680    | 1.082512  |
| O | -5.099463 | -1.285443 | 2.178791  |                  |           |              | 96        |
| O | -2.681425 | -3.146632 | -1.343378 | cis-T25-Q_C6_TSI | Eopt      | -2767.359693 |           |
| C | -5.620039 | -1.335742 | 3.483741  | Pd               | -2.656950 | 0.574566     | 0.133070  |
| H | -4.821079 | -1.398757 | 4.236526  | C                | -3.499764 | 2.626344     | -1.636198 |
| H | -6.175698 | -0.406489 | 3.622545  | C                | -4.681398 | 0.601503     | -1.832289 |
| H | -6.301843 | -2.185651 | 3.614976  | C                | -4.249421 | 3.202147     | -2.653398 |
| C | -1.900225 | -4.171365 | -1.906762 | C                | -5.465542 | 1.116791     | -2.854257 |
| H | -1.644929 | -3.835432 | -2.913268 | H                | -4.032311 | 4.225160     | -2.940683 |
| H | -0.978553 | -4.336752 | -1.331717 | H                | -6.215440 | 0.475426     | -3.304684 |
| H | -2.459016 | -5.113343 | -1.972656 | N                | -3.752851 | 1.373709     | -1.268708 |
| C | 2.308150  | 4.814107  | -0.550113 | H                | -5.846318 | 2.861956     | -4.055228 |
| H | 2.358414  | 4.688736  | -1.629602 | C                | -5.244599 | 2.434015     | -3.258433 |
| C | 1.101364  | 0.469669  | -2.906608 | N                | -3.851028 | -1.002131    | -0.298608 |
| H | 0.840733  | 0.080783  | -3.885848 | N                | -1.802229 | 2.512736     | 0.043872  |
| C | -0.869887 | -0.845854 | 1.492191  | C                | -4.749128 | -0.807222    | -1.299344 |
| C | -2.456860 | 0.206623  | 2.821008  | C                | -2.374942 | 3.292591     | -0.895863 |
| C | -0.478265 | -1.323873 | 0.221984  | O                | -5.541346 | -1.613186    | -1.767562 |
| C | -0.040016 | -1.098165 | 2.620120  | O                | -2.060599 | 4.450188     | -1.202413 |
| C | -1.739460 | -0.083843 | 3.993755  | C                | -3.674529 | -2.278500    | 0.243424  |
| H | -3.393196 | 0.752042  | 2.853634  | C                | -4.023156 | -2.534228    | 1.578391  |
| C | 0.738752  | -1.924102 | 0.069883  | C                | -3.060124 | -3.295902    | -0.505904 |
| H | -1.162284 | -1.217622 | -0.614548 | C                | -3.771281 | -3.781044    | 2.154053  |
| C | 1.232481  | -1.674738 | 2.414955  | C                | -2.813966 | -4.547756    | 0.061227  |
| C | -0.517682 | -0.703445 | 3.889590  | C                | -3.173947 | -4.773175    | 1.384352  |
| H | -2.140947 | 0.223116  | 4.953417  | H                | -2.981628 | -5.745719    | 1.828327  |

|   |           |           |           |                   |           |              |           |
|---|-----------|-----------|-----------|-------------------|-----------|--------------|-----------|
| C | -0.770659 | 3.191593  | 0.812613  | N                 | -1.514186 | -0.436641    | 1.543654  |
| C | 0.519922  | 3.502623  | 0.002896  | H                 | 2.749041  | -1.926335    | 2.173870  |
| H | -1.166260 | 4.182101  | 1.087244  | Pd                | 3.756904  | -0.958054    | -0.703166 |
| C | -0.428996 | 2.458860  | 2.093484  | C                 | 6.467337  | -0.316066    | -1.171615 |
| C | 1.659098  | 3.985027  | 0.882506  | O                 | 7.494729  | 0.256218     | -1.472084 |
| H | 0.237702  | 4.321125  | -0.668217 | O                 | 5.269114  | 0.161086     | -1.392206 |
| H | -1.357372 | 2.193451  | 2.607715  | N                 | 5.213408  | -2.245287    | -0.293902 |
| H | 0.101542  | 1.527418  | 1.862283  | C                 | 4.993977  | -3.516709    | -0.058122 |
| C | 0.430145  | 3.331295  | 2.993112  | C                 | 6.147179  | -4.471384    | 0.106516  |
| C | 1.635998  | 3.880686  | 2.277803  | H                 | 6.889859  | -4.080649    | 0.808856  |
| H | -0.177854 | 4.168154  | 3.368294  | H                 | 6.651035  | -4.623141    | -0.855036 |
| H | 0.749286  | 2.765630  | 3.877475  | H                 | 5.769384  | -5.429942    | 0.462599  |
| C | 2.746313  | 4.313380  | 3.011683  | O                 | 3.818203  | -3.999868    | 0.037091  |
| C | 3.886366  | 4.951919  | 0.994236  | C                 | 6.536149  | -1.685080    | -0.481564 |
| C | 0.968874  | 2.371271  | -0.892098 | C                 | 2.080326  | -2.046496    | 0.138693  |
| C | 3.864612  | 4.843281  | 2.384329  | H                 | 2.994194  | -3.005664    | -0.048202 |
| H | 2.724496  | 4.224972  | 4.096185  | H                 | 7.172440  | -2.331261    | -1.097859 |
| H | 4.756047  | 5.359687  | 0.487394  | C                 | 0.931611  | -1.946334    | -0.699838 |
| C | 1.922166  | 1.433706  | -0.495196 | H                 | 1.016876  | -2.242020    | -1.742652 |
| C | 0.476035  | 2.270222  | -2.194372 | H                 | 7.050625  | -1.542867    | 0.479137  |
| H | 4.718800  | 5.165998  | 2.973033  |                   |           |              |           |
| N | 2.382873  | 0.479262  | -1.311693 | 104               |           |              |           |
| H | 2.354765  | 1.461996  | 0.499151  | cis-T25-Q_C6_TSII | Eopt      | -2904.998305 |           |
| H | -0.259671 | 2.992736  | -2.538098 | Pd                | -3.026916 | 0.484083     | 0.152708  |
| C | 1.929056  | 0.412782  | -2.570203 | C                 | -3.838533 | 2.542294     | -1.623846 |
| H | 2.362929  | -0.359788 | -3.195985 | C                 | -4.993858 | 0.508063     | -1.870229 |
| H | -4.040783 | -3.987373 | 3.183099  | C                 | -4.563104 | 3.118286     | -2.659109 |
| H | -2.341902 | -5.337350 | -0.511152 | C                 | -5.750795 | 1.022660     | -2.912654 |
| O | -4.589033 | -1.492189 | 2.240692  | H                 | -4.347976 | 4.145859     | -2.931123 |
| O | -2.712564 | -2.950338 | -1.768524 | H                 | -6.478503 | 0.376562     | -3.391768 |
| C | -5.005224 | -1.716807 | 3.564833  | N                 | -4.091290 | 1.285274     | -1.272046 |
| H | -4.157536 | -1.962395 | 4.220788  | H                 | -6.111987 | 2.772835     | -4.112503 |
| H | -5.463064 | -0.783962 | 3.899185  | C                 | -5.531089 | 2.345097     | -3.300274 |
| H | -5.746921 | -2.523398 | 3.624225  | N                 | -4.190333 | -1.100596    | -0.327830 |
| C | -2.084410 | -3.927825 | -2.562283 | N                 | -2.184366 | 2.433188     | 0.099191  |
| H | -1.898850 | -3.455597 | -3.528426 | C                 | -5.057885 | -0.907333    | -1.355399 |
| H | -1.130184 | -4.249876 | -2.123370 | C                 | -2.748527 | 3.217526     | -0.841068 |
| H | -2.730304 | -4.802671 | -2.707611 | O                 | -5.819447 | -1.720837    | -1.860377 |
| C | 2.790359  | 4.525991  | 0.258773  | O                 | -2.458540 | 4.390454     | -1.113841 |
| H | 2.807916  | 4.598026  | -0.826571 | C                 | -3.994137 | -2.384873    | 0.187477  |
| C | 0.963162  | 1.285217  | -3.044236 | C                 | -4.381185 | -2.688548    | 1.501396  |
| H | 0.616284  | 1.201533  | -4.068851 | C                 | -3.320058 | -3.360474    | -0.565894 |
| C | -0.379198 | -1.056654 | 1.105415  | C                 | -4.111700 | -3.943816    | 2.050674  |
| C | -1.726244 | -0.296681 | 2.839622  | C                 | -3.055259 | -4.620379    | -0.025647 |
| C | -0.250551 | -1.414641 | -0.255887 | C                 | -3.456715 | -4.895020    | 1.276342  |
| C | 0.676497  | -1.345096 | 2.016315  | H                 | -3.252105 | -5.874304    | 1.699699  |
| C | -0.782110 | -0.670868 | 3.811059  | C                 | -1.205749 | 3.126874     | 0.923818  |
| H | -2.665836 | 0.167080  | 3.118548  | C                 | 0.091006  | 3.536466     | 0.170895  |
| H | -1.101521 | -1.280430 | -0.917331 | H                 | -1.656484 | 4.085933     | 1.226095  |
| C | 1.913448  | -1.787727 | 1.490040  | C                 | -0.871631 | 2.359368     | 2.185831  |
| C | 0.439974  | -1.140164 | 3.393432  | C                 | 1.171581  | 4.042511     | 1.110247  |
| H | -1.011562 | -0.529525 | 4.861510  | H                 | -0.214805 | 4.371066     | -0.468861 |
| H | 1.227795  | -1.368149 | 4.106959  | H                 | -1.802913 | 2.035371     | 2.658561  |
|   |           |           |           | H                 | -0.294263 | 1.461689     | 1.936107  |

|    |           |           |           |
|----|-----------|-----------|-----------|
| C  | -0.082116 | 3.229238  | 3.149153  |
| C  | 1.111661  | 3.875633  | 2.498168  |
| H  | -0.741984 | 4.015458  | 3.545905  |
| H  | 0.241705  | 2.637613  | 4.014691  |
| C  | 2.169512  | 4.341504  | 3.287500  |
| C  | 3.327338  | 5.142865  | 1.340307  |
| C  | 0.646867  | 2.488055  | -0.767770 |
| C  | 3.270546  | 4.968656  | 2.722854  |
| H  | 2.119134  | 4.202657  | 4.365761  |
| H  | 4.182014  | 5.632470  | 0.882126  |
| C  | 1.624045  | 1.569495  | -0.382463 |
| C  | 0.250021  | 2.469617  | -2.106675 |
| H  | 4.082727  | 5.318234  | 3.354304  |
| N  | 2.208396  | 0.727021  | -1.241591 |
| H  | 1.971048  | 1.521320  | 0.645048  |
| H  | -0.512086 | 3.170254  | -2.439388 |
| C  | 1.857921  | 0.750932  | -2.536259 |
| H  | 2.414644  | 0.079764  | -3.185912 |
| H  | -4.411362 | -4.187787 | 3.063024  |
| H  | -2.540660 | -5.379075 | -0.603359 |
| O  | -5.001461 | -1.683340 | 2.170999  |
| O  | -2.937673 | -2.966604 | -1.804470 |
| C  | -5.453063 | -1.956143 | 3.474221  |
| H  | -4.619993 | -2.195338 | 4.150861  |
| H  | -5.948386 | -1.046205 | 3.818024  |
| H  | -6.172395 | -2.784872 | 3.487811  |
| C  | -2.240446 | -3.895028 | -2.598641 |
| H  | -2.032279 | -3.386949 | -3.541646 |
| H  | -1.293399 | -4.194248 | -2.128615 |
| H  | -2.845135 | -4.788843 | -2.796666 |
| C  | 2.285045  | 4.681711  | 0.550208  |
| H  | 2.329325  | 4.805884  | -0.529710 |
| C  | 0.862675  | 1.598928  | -2.999346 |
| H  | 0.592153  | 1.587607  | -4.050326 |
| C  | -0.708634 | -1.046651 | 1.134357  |
| C  | -2.134129 | -0.445912 | 2.867222  |
| C  | -0.537491 | -1.346529 | -0.236763 |
| C  | 0.363879  | -1.263944 | 2.045129  |
| C  | -1.171551 | -0.774224 | 3.837721  |
| H  | -3.109156 | -0.061399 | 3.145234  |
| H  | -1.391816 | -1.276145 | -0.903901 |
| C  | 1.648390  | -1.555236 | 1.525158  |
| C  | 0.091550  | -1.125361 | 3.425008  |
| H  | -1.421766 | -0.684924 | 4.889312  |
| H  | 0.887553  | -1.304379 | 4.143261  |
| N  | -1.894590 | -0.534114 | 1.571759  |
| H  | 2.499663  | -1.632750 | 2.199060  |
| C  | 1.823004  | -1.715834 | 0.166807  |
| C  | 0.694792  | -1.731868 | -0.693979 |
| H  | 0.830490  | -1.958097 | -1.748403 |
| Pd | 3.490758  | -0.901750 | -0.707996 |
| C  | 3.324342  | -3.136176 | -0.221308 |
| C  | 4.627188  | -2.619365 | -0.431941 |

|   |          |           |           |
|---|----------|-----------|-----------|
| H | 3.101443 | -3.518466 | 0.767955  |
| H | 2.822422 | -3.632917 | -1.046427 |
| H | 5.119253 | -2.728382 | -1.394371 |
| C | 5.466963 | -2.368450 | 0.761019  |
| O | 5.054906 | -2.365915 | 1.906906  |
| O | 6.731833 | -2.118890 | 0.419798  |
| C | 7.599142 | -1.723160 | 1.488766  |
| C | 8.911628 | -1.310448 | 0.868385  |
| H | 7.713911 | -2.563296 | 2.182546  |
| H | 7.126721 | -0.901948 | 2.037073  |
| H | 9.611089 | -0.992376 | 1.648260  |
| H | 9.362411 | -2.141966 | 0.317865  |
| H | 8.760510 | -0.477511 | 0.174990  |
| C | 5.225100 | -0.217322 | -2.774172 |
| O | 4.453783 | -0.963038 | -3.391673 |
| O | 5.119802 | 0.085249  | -1.524609 |
| C | 6.411526 | 0.428302  | -3.463267 |
| H | 7.337980 | 0.116241  | -2.970215 |
| H | 6.440367 | 0.146923  | -4.517240 |
| H | 6.347439 | 1.517134  | -3.369883 |

104

cis-T25-Q\_C6\_TSIII Eopt -2905.004845

|    |           |           |           |
|----|-----------|-----------|-----------|
| Pd | -2.995971 | 0.180095  | -0.093186 |
| C  | -3.805342 | 1.882170  | -2.212545 |
| C  | -4.477632 | -0.361051 | -2.432148 |
| C  | -4.439436 | 2.223819  | -3.399926 |
| C  | -5.121909 | -0.088787 | -3.630067 |
| H  | -4.395433 | 3.255761  | -3.730622 |
| H  | -5.615762 | -0.903101 | -4.149248 |
| N  | -3.853162 | 0.623994  | -1.787181 |
| H  | -5.602565 | 1.462553  | -5.042632 |
| C  | -5.101304 | 1.221597  | -4.109489 |
| N  | -3.755092 | -1.634970 | -0.569231 |
| N  | -2.441392 | 2.231669  | -0.278669 |
| C  | -4.382298 | -1.712818 | -1.772814 |
| C  | -3.020237 | 2.822942  | -1.343140 |
| O  | -4.839512 | -2.707383 | -2.318207 |
| O  | -2.938557 | 4.010690  | -1.684938 |
| C  | -3.406928 | -2.807359 | 0.108679  |
| C  | -4.013552 | -3.130540 | 1.331772  |
| C  | -2.370143 | -3.624569 | -0.373718 |
| C  | -3.600597 | -4.250877 | 2.056375  |
| C  | -1.959957 | -4.751658 | 0.340692  |
| C  | -2.582912 | -5.049657 | 1.546816  |
| H  | -2.265717 | -5.925414 | 2.105823  |
| C  | -1.654402 | 3.140432  | 0.545537  |
| C  | -0.435945 | 3.774019  | -0.190359 |
| H  | -2.294199 | 3.999527  | 0.805236  |
| C  | -1.193221 | 2.489267  | 1.834098  |
| C  | 0.443242  | 4.574637  | 0.751113  |
| H  | -0.872567 | 4.466158  | -0.917024 |
| H  | -2.041183 | 1.992415  | 2.309348  |
| H  | -0.444252 | 1.719737  | 1.607758  |

|    |           |           |           |                  |           |              |           |
|----|-----------|-----------|-----------|------------------|-----------|--------------|-----------|
| C  | -0.619038 | 3.522941  | 2.789716  | H                | 3.367871  | 0.500476     | 1.186875  |
| C  | 0.391653  | 4.431533  | 2.141768  | H                | 3.814650  | -0.719907    | 2.584500  |
| H  | -1.442369 | 4.136708  | 3.185337  | H                | 3.809338  | -2.607123    | 0.169591  |
| H  | -0.169893 | 3.024901  | 3.658416  | C                | 5.636321  | -1.764589    | 1.071486  |
| C  | 1.274743  | 5.171384  | 2.936686  | O                | 6.151098  | -1.089365    | 1.938074  |
| C  | 2.240241  | 6.194052  | 0.987704  | O                | 6.297456  | -2.560400    | 0.230092  |
| C  | 0.386341  | 2.787635  | -0.989507 | C                | 7.720678  | -2.378837    | 0.214736  |
| C  | 2.194168  | 6.044518  | 2.373615  | C                | 8.265731  | -3.221070    | -0.911833 |
| H  | 1.233256  | 5.052011  | 4.017695  | H                | 8.127102  | -2.671606    | 1.188603  |
| H  | 2.953366  | 6.874956  | 0.531735  | H                | 7.919876  | -1.315537    | 0.057131  |
| C  | 1.525748  | 2.172785  | -0.473062 | H                | 9.355600  | -3.125547    | -0.954523 |
| C  | 0.048163  | 2.493869  | -2.312666 | H                | 8.016559  | -4.278134    | -0.773091 |
| H  | 2.874095  | 6.605105  | 3.009138  | H                | 7.852365  | -2.883961    | -1.866743 |
| N  | 2.289358  | 1.322822  | -1.177999 | C                | 5.362084  | -0.764767    | -2.340872 |
| H  | 1.854791  | 2.382539  | 0.538750  | O                | 6.129243  | -0.187420    | -1.569859 |
| H  | -0.817557 | 2.976681  | -2.758235 | O                | 4.089932  | -0.909866    | -2.136961 |
| C  | 1.954900  | 1.052084  | -2.448778 | C                | 5.858308  | -1.392757    | -3.628347 |
| H  | 2.610070  | 0.352116  | -2.959236 | H                | 5.213813  | -1.112133    | -4.466802 |
| H  | -4.066179 | -4.509692 | 2.999958  | H                | 6.887105  | -1.088047    | -3.828812 |
| H  | -1.164187 | -5.387936 | -0.028023 | H                | 5.814622  | -2.483877    | -3.536465 |
| O  | -4.985469 | -2.276853 | 1.742314  |                  |           |              | 96        |
| O  | -1.802119 | -3.207403 | -1.530385 | cis-T25-Q_C7_IN2 | Eopt      | -2767.399603 |           |
| C  | -5.642274 | -2.576376 | 2.948936  | Pd               | -2.407508 | -0.439173    | 0.070109  |
| H  | -4.948578 | -2.562560 | 3.801876  | C                | -3.979425 | 0.750288     | -1.971018 |
| H  | -6.396206 | -1.798409 | 3.082811  | C                | -3.543233 | -1.542821    | -2.266092 |
| H  | -6.138409 | -3.554341 | 2.907681  | C                | -4.748565 | 0.787528     | -3.126329 |
| C  | -0.743595 | -3.974350 | -2.053455 | C                | -4.294531 | -1.572203    | -3.432343 |
| H  | -0.431521 | -3.470008 | -2.969163 | H                | -5.192010 | 1.731858     | -3.422855 |
| H  | 0.103827  | -4.018225 | -1.355658 | H                | -4.372618 | -2.508180    | -3.974916 |
| H  | -1.068114 | -4.994300 | -2.293991 | N                | -3.418981 | -0.396931    | -1.597630 |
| C  | 1.370590  | 5.462781  | 0.192355  | H                | -5.501654 | -0.388304    | -4.764065 |
| H  | 1.408398  | 5.566671  | -0.889986 | C                | -4.905552 | -0.391502    | -3.855870 |
| C  | 0.840343  | 1.621811  | -3.047243 | N                | -2.215403 | -2.380908    | -0.486025 |
| H  | 0.606925  | 1.384774  | -4.080410 | N                | -2.876976 | 1.614861     | -0.040079 |
| C  | -0.922322 | -0.880954 | 1.769096  | C                | -2.768094 | -2.698939    | -1.687967 |
| C  | -2.884013 | -0.276895 | 2.852000  | C                | -3.636860 | 1.931169     | -1.107237 |
| C  | -0.259114 | -1.225127 | 0.568296  | O                | -2.683486 | -3.756109    | -2.297116 |
| C  | -0.212332 | -0.923898 | 2.999565  | O                | -4.003350 | 3.059939     | -1.460898 |
| C  | -2.288956 | -0.428160 | 4.114893  | C                | -1.190974 | -3.179627    | 0.030066  |
| H  | -3.917073 | 0.034968  | 2.747324  | C                | -1.340794 | -3.841465    | 1.257695  |
| C  | 1.086908  | -1.449978 | 0.582270  | C                | 0.056352  | -3.220844    | -0.618983 |
| H  | -0.831817 | -1.288639 | -0.352418 | C                | -0.263617 | -4.519585    | 1.835500  |
| C  | 1.196796  | -1.079465 | 2.963402  | C                | 1.126975  | -3.920550    | -0.060216 |
| C  | -0.942993 | -0.704201 | 4.186222  | C                | 0.954466  | -4.552833    | 1.166588  |
| H  | -2.883489 | -0.267347 | 5.007600  | H                | 1.791967  | -5.083899    | 1.609749  |
| C  | 1.853491  | -1.268811 | 1.769803  | C                | -0.126125 | -0.632312    | 2.067325  |
| H  | 1.598030  | -1.679846 | -0.348558 | C                | -2.237750 | -0.977427    | 2.970345  |
| H  | -0.431730 | -0.748936 | 5.144428  | C                | 0.676200  | -0.416203    | 0.932156  |
| N  | -2.216076 | -0.464091 | 1.726215  | C                | 0.472264  | -0.688333    | 3.356863  |
| H  | 1.758954  | -0.970241 | 3.887980  | C                | -1.714733 | -1.114366    | 4.268492  |
| Pd | 3.640072  | -0.075214 | -0.270089 | H                | -3.303754 | -1.054878    | 2.786023  |
| C  | 3.324703  | -1.094486 | 1.684848  | C                | 2.029542  | -0.150974    | 1.038012  |
| C  | 4.179886  | -1.798863 | 0.794776  | H                | 0.178325  | -0.437945    | -0.034029 |

|    |           |           |           |    |           |           |                                    |
|----|-----------|-----------|-----------|----|-----------|-----------|------------------------------------|
| C  | 1.863980  | -0.448436 | 3.459690  | H  | -3.823132 | -4.261419 | 3.300200                           |
| C  | -0.363325 | -0.950059 | 4.461806  | H  | -2.601407 | -5.507255 | 2.930390                           |
| H  | -2.388422 | -1.315624 | 5.094345  | C  | 1.345022  | -2.535427 | -2.479158                          |
| H  | 0.070126  | -1.010194 | 5.457156  | H  | 1.176986  | -1.941957 | -3.378821                          |
| N  | -1.480723 | -0.730148 | 1.917653  | H  | 2.162997  | -2.082171 | -1.901663                          |
| H  | 2.327818  | -0.474218 | 4.443064  | H  | 1.616596  | -3.558921 | -2.766035                          |
| Pd | 3.054938  | 0.311184  | -0.612311 | C  | 0.267784  | 5.496296  | 0.065895                           |
| C  | 5.387863  | 0.510680  | -2.254123 | H  | 0.294211  | 5.497127  | -1.021765                          |
| O  | 6.227044  | 0.725111  | -3.108840 | C  | 0.019535  | 1.792433  | -3.154808                          |
| O  | 4.118302  | 0.749420  | -2.335393 | H  | -0.200674 | 1.624471  | -4.203747                          |
| N  | 4.756589  | -0.736349 | -0.214180 | H  | 6.203344  | 0.769038  | -0.283427                          |
| C  | 4.886601  | -1.910938 | 0.289304  | H  | 3.045427  | -2.024331 | 0.728186                           |
| C  | 6.165295  | -2.686021 | 0.357670  |    |           |           | 104                                |
| H  | 6.013718  | -3.575188 | 0.970588  |    |           |           | cis-T25-Q_C7_IN3 Eopt -2905.025660 |
| H  | 6.970288  | -2.082020 | 0.784439  | Pd | -2.739583 | 0.223298  | 0.317854                           |
| H  | 6.475921  | -2.998884 | -0.645155 | C  | -4.178290 | 1.759525  | -1.585345                          |
| O  | 3.859714  | -2.570234 | 0.803219  | C  | -4.465467 | -0.569456 | -1.766485                          |
| C  | 5.857748  | -0.071142 | -0.899549 | C  | -5.066943 | 1.984600  | -2.628129                          |
| H  | 6.707889  | -0.733052 | -1.079061 | C  | -5.358423 | -0.413276 | -2.817359                          |
| C  | -2.391117 | 2.765489  | 0.700814  | H  | -5.261774 | 3.007583  | -2.931261                          |
| C  | -1.381563 | 3.622422  | -0.128282 | H  | -5.782893 | -1.301511 | -3.272817                          |
| H  | -3.245369 | 3.433551  | 0.888890  | N  | -3.917549 | 0.509970  | -1.209968                          |
| C  | -1.800860 | 2.371710  | 2.040305  | H  | -6.358659 | 1.030541  | -4.061136                          |
| C  | -0.561835 | 4.577345  | 0.720821  | C  | -5.660449 | 0.880877  | -3.242383                          |
| H  | -2.004140 | 4.218037  | -0.804365 | N  | -3.200373 | -1.704794 | -0.107501                          |
| H  | -2.512210 | 1.731712  | 2.571834  | N  | -2.609382 | 2.324006  | 0.122149                           |
| H  | -0.888141 | 1.785888  | 1.886655  | C  | -3.983251 | -1.883726 | -1.206148                          |
| C  | -1.482927 | 3.607609  | 2.864474  | C  | -3.387963 | 2.815004  | -0.862416                          |
| C  | -0.594396 | 4.568210  | 2.120136  | O  | -4.295900 | -2.936929 | -1.743726                          |
| H  | -2.421859 | 4.114621  | 3.133630  | O  | -3.451941 | 3.986937  | -1.257436                          |
| H  | -1.007180 | 3.322402  | 3.810699  | C  | -2.369068 | -2.746008 | 0.318933                           |
| C  | 0.206338  | 5.473039  | 2.825978  | C  | -2.502943 | -3.305249 | 1.598008                           |
| C  | 1.055638  | 6.391696  | 0.774262  | C  | -1.302873 | -3.160010 | -0.500306                          |
| C  | -0.492094 | 2.779871  | -1.015229 | C  | -1.578876 | -4.246421 | 2.059665                           |
| C  | 1.025581  | 6.379384  | 2.168259  | C  | -0.388461 | -4.114511 | -0.050816                          |
| H  | 0.181760  | 5.455364  | 3.913800  | C  | -0.535489 | -4.639363 | 1.227873                           |
| H  | 1.692410  | 7.093917  | 0.243612  | H  | 0.178575  | -5.375801 | 1.586096                           |
| C  | 0.672897  | 2.185896  | -0.538220 | C  | -0.413284 | -0.572130 | 2.136740                           |
| C  | -0.819411 | 2.557519  | -2.353852 | C  | -2.455459 | -0.220315 | 3.191347                           |
| H  | 1.641789  | 7.070381  | 2.736954  | C  | 0.330982  | -0.653506 | 0.942479                           |
| N  | 1.457708  | 1.409628  | -1.300117 | C  | 0.231675  | -0.753202 | 3.391927                           |
| H  | 0.991419  | 2.328539  | 0.487065  | C  | -1.902526 | -0.451941 | 4.462342                           |
| H  | -1.731423 | 2.992723  | -2.754701 | H  | -3.506765 | 0.019856  | 3.075836                           |
| C  | 1.158933  | 1.235114  | -2.596776 | C  | 1.703986  | -0.805300 | 0.966259                           |
| H  | 1.873579  | 0.657495  | -3.172043 | H  | -0.226150 | -0.569617 | 0.014108                           |
| C  | 2.609773  | -0.165161 | 2.340326  | C  | 1.631240  | -0.945187 | 3.398164                           |
| H  | 3.672136  | 0.039312  | 2.448344  | C  | -0.554381 | -0.699839 | 4.560634                           |
| H  | -0.368578 | -5.025281 | 2.788024  | H  | -2.541017 | -0.403216 | 5.337720                           |
| H  | 2.086983  | -3.967442 | -0.559550 | H  | -0.080685 | -0.847424 | 5.528150                           |
| O  | -2.569859 | -3.749349 | 1.823587  | N  | -1.742227 | -0.259466 | 2.080396                           |
| O  | 0.131668  | -2.506034 | -1.764496 | H  | 2.140415  | -1.077569 | 4.349975                           |
| C  | -2.777132 | -4.429097 | 3.036611  | C  | -1.701468 | 3.297338  | 0.701293                           |
| H  | -2.133901 | -4.035404 | 3.835949  | C  | -0.592123 | 3.746567  | -0.304793                          |

|    |           |           |           |
|----|-----------|-----------|-----------|
| H  | -2.274286 | 4.210844  | 0.921058  |
| C  | -1.081528 | 2.800722  | 1.992479  |
| C  | 0.552896  | 4.484626  | 0.361414  |
| H  | -1.092865 | 4.436872  | -0.992611 |
| H  | -1.871555 | 2.431077  | 2.653720  |
| H  | -0.414663 | 1.957241  | 1.782070  |
| C  | -0.303185 | 3.915065  | 2.671737  |
| C  | 0.705878  | 4.549627  | 1.751348  |
| H  | -1.006117 | 4.686099  | 3.021637  |
| H  | 0.202869  | 3.534283  | 3.567287  |
| C  | 1.808433  | 5.228125  | 2.282982  |
| C  | 2.591565  | 5.778269  | 0.078152  |
| C  | -0.098386 | 2.591219  | -1.142661 |
| C  | 2.746127  | 5.839142  | 1.462700  |
| H  | 1.925751  | 5.269645  | 3.364068  |
| H  | 3.316683  | 6.251557  | -0.577980 |
| C  | 0.946620  | 1.770219  | -0.730713 |
| C  | -0.726900 | 2.269005  | -2.347931 |
| H  | 3.595763  | 6.358064  | 1.898084  |
| N  | 1.331808  | 0.688222  | -1.422900 |
| H  | 1.485391  | 1.971471  | 0.187818  |
| H  | -1.541265 | 2.895197  | -2.703146 |
| C  | 0.718591  | 0.378644  | -2.574751 |
| H  | 1.068636  | -0.515207 | -3.080047 |
| C  | 2.346172  | -0.946518 | 2.224893  |
| H  | 3.419208  | -1.087932 | 2.278885  |
| H  | -1.669799 | -4.679117 | 3.048873  |
| H  | 0.434445  | -4.431334 | -0.681241 |
| O  | -3.560743 | -2.861334 | 2.323148  |
| O  | -1.227846 | -2.540631 | -1.697406 |
| C  | -3.761674 | -3.434474 | 3.590659  |
| H  | -2.924189 | -3.220796 | 4.269050  |
| H  | -4.670762 | -2.977711 | 3.986762  |
| H  | -3.904329 | -4.520783 | 3.524230  |
| C  | -0.359265 | -3.087595 | -2.669565 |
| H  | -0.588488 | -2.565720 | -3.600258 |
| H  | 0.694580  | -2.916292 | -2.428776 |
| H  | -0.549116 | -4.159334 | -2.804144 |
| C  | 1.503743  | 5.105104  | -0.458357 |
| H  | 1.382044  | 5.047250  | -1.538058 |
| C  | -0.316307 | 1.156854  | -3.069495 |
| H  | -0.797746 | 0.878333  | -4.000947 |
| Pd | 2.722719  | -0.719393 | -0.763546 |
| C  | 3.336480  | -2.799117 | -0.283272 |
| C  | 4.478152  | -2.048181 | -0.445418 |
| H  | 2.999192  | -3.091620 | 0.706354  |
| H  | 2.883869  | -3.270570 | -1.151316 |
| H  | 4.911531  | -1.903764 | -1.429117 |
| C  | 5.348148  | -1.636219 | 0.687189  |
| O  | 5.243536  | -2.013473 | 1.835758  |
| O  | 6.294781  | -0.797528 | 0.260711  |
| C  | 7.196644  | -0.315637 | 1.266760  |
| C  | 8.153955  | 0.636633  | 0.593615  |

|                                    |           |           |           |
|------------------------------------|-----------|-----------|-----------|
| H                                  | 7.709091  | -1.171911 | 1.717918  |
| H                                  | 6.613070  | 0.172524  | 2.054379  |
| H                                  | 8.862148  | 1.033190  | 1.328132  |
| H                                  | 8.719800  | 0.128900  | -0.193252 |
| H                                  | 7.614025  | 1.475348  | 0.143934  |
| C                                  | 3.430634  | -1.242727 | -3.523647 |
| O                                  | 2.652604  | -2.197698 | -3.380066 |
| O                                  | 3.730687  | -0.391663 | -2.606284 |
| C                                  | 4.087868  | -0.978884 | -4.864266 |
| H                                  | 5.151779  | -0.762030 | -4.733575 |
| H                                  | 3.951824  | -1.831962 | -5.531363 |
| H                                  | 3.631960  | -0.091572 | -5.318075 |
| 104                                |           |           |           |
| cis-T25-Q_C7_IN4 Eopt -2905.069913 |           |           |           |
| Pd                                 | -2.236394 | 0.879758  | -0.040768 |
| C                                  | -2.982449 | 2.513215  | -2.236441 |
| C                                  | -3.666609 | 0.273013  | -2.407696 |
| C                                  | -3.605445 | 2.832205  | -3.435454 |
| C                                  | -4.303236 | 0.521827  | -3.615692 |
| H                                  | -3.549492 | 3.855643  | -3.790103 |
| H                                  | -4.811466 | -0.299454 | -4.109330 |
| N                                  | -3.025489 | 1.261373  | -1.787411 |
| H                                  | -4.761149 | 2.041077  | -5.070227 |
| C                                  | -4.267341 | 1.818312  | -4.128566 |
| N                                  | -3.057899 | -0.945373 | -0.467827 |
| N                                  | -1.641343 | 2.888293  | -0.297419 |
| C                                  | -3.653620 | -1.045346 | -1.685752 |
| C                                  | -2.155798 | 3.454396  | -1.409229 |
| O                                  | -4.170123 | -2.032585 | -2.194389 |
| O                                  | -1.942878 | 4.595147  | -1.839071 |
| C                                  | -2.928413 | -2.109784 | 0.294555  |
| C                                  | -3.584686 | -2.225571 | 1.530404  |
| C                                  | -2.116951 | -3.169649 | -0.146233 |
| C                                  | -3.411233 | -3.361819 | 2.323601  |
| C                                  | -1.978955 | -4.327160 | 0.621808  |
| C                                  | -2.615602 | -4.401225 | 1.854664  |
| H                                  | -2.494167 | -5.292962 | 2.463000  |
| C                                  | -0.600757 | 3.688105  | 0.331018  |
| C                                  | 0.650986  | 3.821519  | -0.594146 |
| H                                  | -0.982437 | 4.712736  | 0.451657  |
| C                                  | -0.208265 | 3.166881  | 1.698974  |
| C                                  | 1.877596  | 4.348448  | 0.123497  |
| H                                  | 0.364765  | 4.543510  | -1.366186 |
| H                                  | -1.105892 | 3.061202  | 2.313656  |
| H                                  | 0.236603  | 2.167569  | 1.610117  |
| C                                  | 0.760848  | 4.121714  | 2.378481  |
| C                                  | 1.946358  | 4.463056  | 1.515863  |
| H                                  | 0.226495  | 5.049036  | 2.635101  |
| H                                  | 1.105556  | 3.696807  | 3.328964  |
| C                                  | 3.131109  | 4.920573  | 2.103111  |
| C                                  | 4.162023  | 5.155701  | -0.055513 |
| C                                  | 0.942957  | 2.521668  | -1.302225 |
| C                                  | 4.232417  | 5.264873  | 1.332794  |



|    |           |           |           |
|----|-----------|-----------|-----------|
| H  | 3.182423  | 4.999443  | 3.187197  |
| H  | 5.017065  | 5.418620  | -0.671785 |
| C  | 1.706201  | 1.525875  | -0.703685 |
| C  | 0.417816  | 2.249556  | -2.567144 |
| H  | 5.144910  | 5.610842  | 1.810327  |
| N  | 1.904575  | 0.325381  | -1.268075 |
| H  | 2.198057  | 1.690577  | 0.249865  |
| H  | -0.162735 | 3.014203  | -3.076596 |
| C  | 1.374722  | 0.057587  | -2.470059 |
| H  | 1.571731  | -0.931586 | -2.869099 |
| H  | -3.904194 | -3.452565 | 3.284204  |
| H  | -1.371873 | -5.155444 | 0.275044  |
| O  | -4.376357 | -1.177760 | 1.871274  |
| O  | -1.475341 | -2.961096 | -1.319744 |
| C  | -5.095856 | -1.273541 | 3.075197  |
| H  | -4.426069 | -1.337816 | 3.943139  |
| H  | -5.686493 | -0.358216 | 3.145779  |
| H  | -5.770848 | -2.139166 | 3.073313  |
| C  | -0.933394 | -4.083412 | -1.978694 |
| H  | -0.114526 | -4.541136 | -1.408909 |
| H  | -1.709294 | -4.833962 | -2.170555 |
| H  | -0.532940 | -3.712446 | -2.922898 |
| C  | 2.992728  | 4.700362  | -0.646201 |
| H  | 2.935114  | 4.601768  | -1.728270 |
| C  | 0.634133  | 1.010005  | -3.154199 |
| H  | 0.231967  | 0.773099  | -4.133816 |
| Pd | 3.067509  | -0.948322 | -0.191623 |
| C  | 5.121649  | -0.862246 | 1.217553  |
| O  | 4.769516  | 0.218737  | 0.674094  |
| O  | 4.430691  | -1.924681 | 1.035154  |
| C  | 6.363841  | -0.942835 | 2.054611  |
| H  | 7.196128  | -1.273155 | 1.422885  |
| H  | 6.608152  | 0.039279  | 2.464240  |
| H  | 6.237204  | -1.675947 | 2.854685  |
| C  | -0.852370 | -0.490118 | 2.359054  |
| N  | -1.748089 | 0.453541  | 1.939578  |
| C  | -2.502373 | 1.080532  | 2.827943  |
| C  | -2.408946 | 0.861447  | 4.209739  |
| C  | -1.503588 | -0.066029 | 4.668093  |
| C  | -0.709798 | -0.777280 | 3.748858  |
| C  | 0.208665  | -1.779722 | 4.142133  |
| C  | 0.763586  | -2.213351 | 1.812986  |
| C  | -0.088462 | -1.204990 | 1.414737  |
| H  | -0.230005 | -0.964942 | 0.365542  |
| C  | 1.492306  | -3.096031 | 0.839691  |
| C  | 1.763927  | -2.476849 | -0.511756 |
| C  | 2.479122  | -3.397281 | -1.426606 |
| O  | 3.095265  | -4.391188 | -1.106459 |
| O  | 2.364779  | -2.993545 | -2.723722 |
| C  | 3.187285  | -3.691638 | -3.664414 |
| C  | 4.602364  | -3.152542 | -3.646715 |
| H  | 5.208369  | -3.651273 | -4.410994 |
| H  | 5.062102  | -3.330625 | -2.670436 |

|                  |           |              |           |
|------------------|-----------|--------------|-----------|
| H                | 4.609127  | -2.075862    | -3.845515 |
| H                | 2.704486  | -3.527597    | -4.631545 |
| H                | 3.168908  | -4.758844    | -3.427298 |
| H                | 0.867402  | -2.082361    | -0.994728 |
| H                | 0.886857  | -4.011109    | 0.718430  |
| H                | 0.332580  | -1.990698    | 5.201138  |
| H                | -1.398050 | -0.269384    | 5.730975  |
| H                | -3.048221 | 1.421455     | 4.883422  |
| H                | -3.209869 | 1.799239     | 2.427116  |
| C                | 0.913061  | -2.478649    | 3.200065  |
| H                | 1.605861  | -3.258328    | 3.505181  |
| H                | 2.440545  | -3.426803    | 1.276223  |
| 104              |           |              |           |
| cis-T25-Q_C7_IN5 | Eopt      | -2905.034747 |           |
| Pd               | -1.289958 | -1.879284    | 0.237132  |
| C                | -1.045126 | -3.175821    | 2.742341  |
| C                | -2.936837 | -1.795100    | 2.535303  |
| C                | -1.418644 | -3.554295    | 4.025038  |
| C                | -3.361737 | -2.124641    | 3.814522  |
| H                | -0.784743 | -4.250526    | 4.563330  |
| H                | -4.282323 | -1.684834    | 4.182705  |
| N                | -1.803673 | -2.316611    | 2.067823  |
| H                | -2.901752 | -3.293176    | 5.562676  |
| C                | -2.588615 | -3.015053    | 4.560265  |
| N                | -3.060750 | -0.870168    | 0.359503  |
| N                | 0.358260  | -3.048666    | 0.814642  |
| C                | -3.668666 | -0.897185    | 1.574128  |
| C                | 0.217887  | -3.590398    | 2.042649  |
| O                | -4.696548 | -0.326048    | 1.916701  |
| O                | 1.030808  | -4.296072    | 2.652494  |
| C                | -3.590847 | -0.056091    | -0.644236 |
| C                | -4.101711 | -0.628527    | -1.821381 |
| C                | -3.577414 | 1.342460     | -0.521132 |
| C                | -4.552487 | 0.179044     | -2.867102 |
| C                | -4.055049 | 2.153720     | -1.551566 |
| C                | -4.525029 | 1.561830     | -2.717045 |
| H                | -4.883698 | 2.191065     | -3.526639 |
| C                | 1.695478  | -3.192931    | 0.255419  |
| C                | 2.751244  | -2.445341    | 1.124042  |
| H                | 1.975665  | -4.256027    | 0.302841  |
| C                | 1.770717  | -2.745186    | -1.191426 |
| C                | 4.096266  | -2.305801    | 0.440078  |
| H                | 2.889540  | -3.069688    | 2.012525  |
| H                | 1.006714  | -3.272801    | -1.769365 |
| H                | 1.548881  | -1.674779    | -1.269518 |
| C                | 3.140388  | -3.036171    | -1.786164 |
| C                | 4.280701  | -2.571556    | -0.919954 |
| H                | 3.240237  | -4.119981    | -1.949181 |
| H                | 3.220895  | -2.565854    | -2.773209 |
| C                | 5.558984  | -2.432721    | -1.472129 |
| C                | 6.455869  | -1.766654    | 0.656564  |
| C                | 2.226082  | -1.116587    | 1.608914  |
| C                | 6.641725  | -2.040956    | -0.698653 |

|    |           |           |           |                  |           |              |           |
|----|-----------|-----------|-----------|------------------|-----------|--------------|-----------|
| H  | 5.695943  | -2.634390 | -2.532530 | H                | 0.368260  | 4.656875     | 4.706608  |
| H  | 7.292698  | -1.453060 | 1.274518  | H                | -1.405340 | 4.645083     | 4.608606  |
| C  | 2.213797  | 0.005691  | 0.782539  | H                | -1.296904 | 6.231487     | 2.646540  |
| C  | 1.698292  | -0.974654 | 2.891798  | H                | 0.466781  | 6.229168     | 2.741539  |
| H  | 7.624827  | -1.937420 | -1.149749 | H                | -0.603919 | 2.438387     | 0.738848  |
| N  | 1.693461  | 1.179211  | 1.159824  | H                | -0.017075 | 4.182625     | -1.724830 |
| H  | 2.627106  | -0.019759 | -0.221315 | H                | -0.340652 | 1.265284     | -5.358462 |
| H  | 1.693461  | -1.829871 | 3.563307  | H                | -0.893468 | -1.152344    | -5.653755 |
| C  | 1.180608  | 1.304128  | 2.391628  | H                | -1.428996 | -3.357722    | -4.587222 |
| H  | 0.771519  | 2.276712  | 2.649626  | H                | -1.492514 | -3.498173    | -2.099447 |
| H  | -4.938494 | -0.255650 | -3.781552 | C                | -0.198424 | 2.201231     | -3.442231 |
| H  | -4.044178 | 3.233484  | -1.456869 | H                | 0.034792  | 3.182370     | -3.845387 |
| O  | -4.121446 | -1.985336 | -1.848648 |                  |           |              | 96        |
| O  | -3.044480 | 1.823150  | 0.629089  | cis-T25-Q_C7_TSI | Eopt      | -2767.368540 |           |
| C  | -4.709869 | -2.602746 | -2.966332 | Pd               | -2.403860 | -0.132591    | -0.042227 |
| H  | -4.153742 | -2.385766 | -3.888770 | C                | -3.710307 | 1.167740     | -2.197613 |
| H  | -4.675248 | -3.675965 | -2.769707 | C                | -3.521266 | -1.167818    | -2.416931 |
| H  | -5.754890 | -2.292619 | -3.093695 | C                | -4.388959 | 1.260562     | -3.405284 |
| C  | -3.429255 | 3.120710  | 1.025243  | C                | -4.190620 | -1.143378    | -3.632202 |
| H  | -3.026171 | 3.892700  | 0.356303  | H                | -4.700503 | 2.240382     | -3.750519 |
| H  | -4.521249 | 3.206164  | 1.065292  | H                | -4.344762 | -2.080064    | -4.157023 |
| H  | -3.009179 | 3.267258  | 2.021534  | N                | -3.310993 | -0.025249    | -1.764857 |
| C  | 5.191244  | -1.897789 | 1.211490  | H                | -5.158184 | 0.133409     | -5.069429 |
| H  | 5.037444  | -1.683478 | 2.267138  | C                | -4.629513 | 0.087373     | -4.121517 |
| C  | 1.171573  | 0.248633  | 3.290701  | N                | -2.438680 | -2.101413    | -0.525848 |
| H  | 0.755211  | 0.386519  | 4.283526  | N                | -2.647379 | 1.957174     | -0.210499 |
| Pd | 1.846999  | 2.869143  | -0.240321 | C                | -2.960666 | -2.396018    | -1.745711 |
| H  | 2.124074  | 4.095462  | -1.125986 | C                | -3.294324 | 2.325753     | -1.334903 |
| C  | 4.057663  | 1.624332  | -1.414586 | O                | -3.015912 | -3.485662    | -2.298587 |
| O  | 3.848894  | 2.515796  | -0.498728 | O                | -3.502546 | 3.478430     | -1.735794 |
| O  | 3.175989  | 1.024766  | -2.038132 | C                | -1.694810 | -3.061631    | 0.165695  |
| C  | 5.523679  | 1.318525  | -1.634544 | C                | -2.129793 | -3.533605    | 1.413786  |
| H  | 5.884330  | 0.705144  | -0.801969 | C                | -0.438548 | -3.468739    | -0.317991 |
| H  | 5.654967  | 0.756351  | -2.560681 | C                | -1.327979 | -4.395031    | 2.164968  |
| H  | 6.112674  | 2.239251  | -1.654755 | C                | 0.363260  | -4.338270    | 0.423579  |
| C  | -0.754607 | -0.305991 | -2.342199 | C                | -0.092889 | -4.785837    | 1.657053  |
| N  | -1.027337 | -1.530804 | -1.798089 | H                | 0.535036  | -5.450847    | 2.243075  |
| C  | -1.268615 | -2.558016 | -2.592312 | C                | -0.235987 | -0.582862    | 2.038882  |
| C  | -1.232953 | -2.471280 | -3.993940 | C                | -2.387727 | -0.349887    | 2.884263  |
| C  | -0.939051 | -1.261152 | -4.573217 | C                | 0.610275  | -0.802956    | 0.933294  |
| C  | -0.694575 | -0.139571 | -3.756353 | C                | 0.317811  | -0.533295    | 3.349547  |
| C  | -0.401337 | 1.140919  | -4.280981 | C                | -1.923686 | -0.368350    | 4.211936  |
| C  | -0.278405 | 2.044125  | -2.033907 | H                | -3.444477 | -0.247132    | 2.663086  |
| C  | -0.542129 | 0.797687  | -1.499505 | C                | 1.982118  | -0.900562    | 1.094953  |
| H  | -0.602381 | 0.638458  | -0.427231 | H                | 0.155172  | -0.908299    | -0.047671 |
| C  | -0.064360 | 3.231924  | -1.199910 | C                | 1.724634  | -0.604848    | 3.502814  |
| C  | -0.221768 | 3.287839  | 0.182873  | C                | -0.570967 | -0.424982    | 4.440844  |
| C  | -0.303062 | 4.602621  | 0.856322  | H                | -2.637731 | -0.302788    | 5.025752  |
| O  | -0.303633 | 5.684738  | 0.314701  | H                | -0.172061 | -0.396763    | 5.451609  |
| O  | -0.389392 | 4.433642  | 2.190139  | N                | -1.579798 | -0.420458    | 1.844127  |
| C  | -0.430109 | 5.641267  | 2.961700  | H                | 2.145388  | -0.542888    | 4.503199  |
| C  | -0.509052 | 5.243157  | 4.415304  | H                | 2.623920  | -1.848891    | 0.500019  |
| H  | -0.549025 | 6.136943  | 5.045857  | Pd               | 3.162350  | -0.115939    | -0.547624 |

|   |           |           |           |                   |           |              |           |
|---|-----------|-----------|-----------|-------------------|-----------|--------------|-----------|
| C | 5.614126  | 0.344570  | -1.870867 | H                 | 1.215182  | 5.184455     | -1.031340 |
| O | 6.485687  | 0.785357  | -2.590176 | C                 | 0.309396  | 1.616356     | -3.152685 |
| O | 4.355887  | 0.707408  | -1.932439 | H                 | 0.099583  | 1.454534     | -4.204615 |
| N | 4.756102  | -1.258710 | -0.225763 | H                 | 6.548919  | -0.172201    | -0.016723 |
| C | 4.591643  | -2.526029 | 0.083595  | 104               |           |              |           |
| C | 5.756860  | -3.481881 | 0.074548  | cis-T25-Q_C7_TSII | Eopt      | -2905.008989 |           |
| H | 5.465444  | -4.397004 | 0.590826  | Pd                | -2.670658 | -0.376338    | 0.052485  |
| H | 6.639362  | -3.050290 | 0.555011  | C                 | -4.151478 | 0.472023     | -2.217415 |
| H | 6.027290  | -3.733760 | -0.957604 | C                 | -3.760944 | -1.842145    | -2.102029 |
| O | 3.449025  | -2.987499 | 0.399863  | C                 | -4.883182 | 0.324635     | -3.388212 |
| C | 5.962319  | -0.690973 | -0.787844 | C                 | -4.478778 | -2.058999    | -3.269377 |
| H | 6.611245  | -1.447038 | -1.240946 | H                 | -5.296386 | 1.212793     | -3.853694 |
| C | -2.078544 | 3.072361  | 0.526948  | H                 | -4.569142 | -3.074670    | -3.639143 |
| C | -0.885318 | 3.735188  | -0.236054 | N                 | -3.622410 | -0.601688    | -1.637241 |
| H | -2.847773 | 3.855630  | 0.594379  | H                 | -5.612841 | -1.099856    | -4.827291 |
| C | -1.684659 | 2.691087  | 1.939573  | C                 | -5.045005 | -0.958016    | -3.912111 |
| C | 0.029539  | 4.562105  | 0.650138  | N                 | -2.514296 | -2.392202    | -0.157575 |
| H | -1.354185 | 4.411212  | -0.959615 | N                 | -3.124535 | 1.645853     | -0.408970 |
| H | -2.536335 | 2.205716  | 2.426358  | C                 | -3.064627 | -2.902341    | -1.294247 |
| H | -0.860795 | 1.968793  | 1.920396  | C                 | -3.825210 | 1.777778     | -1.553881 |
| C | -1.260110 | 3.921897  | 2.722036  | O                 | -3.040058 | -4.061578    | -1.683632 |
| C | -0.137805 | 4.653392  | 2.036754  | O                 | -4.150913 | 2.831114     | -2.117284 |
| H | -2.123337 | 4.594792  | 2.836074  | C                 | -1.606308 | -3.185621    | 0.548376  |
| H | -0.953274 | 3.641389  | 3.736977  | C                 | -1.842687 | -3.541589    | 1.883958  |
| C | 0.752345  | 5.434126  | 2.781868  | C                 | -0.395762 | -3.573133    | -0.059620 |
| C | 1.959040  | 6.034314  | 0.792470  | C                 | -0.895297 | -4.280029    | 2.600051  |
| C | -0.105069 | 2.734226  | -1.056277 | C                 | 0.533651  | -4.348011    | 0.639062  |
| C | 1.792948  | 6.121973  | 2.173972  | C                 | 0.271803  | -4.686014    | 1.963471  |
| H | 0.620429  | 5.493419  | 3.860442  | H                 | 0.995486  | -5.282148    | 2.512381  |
| H | 2.770279  | 6.563547  | 0.300770  | C                 | -0.530070 | -0.119057    | 2.215658  |
| C | 0.923393  | 1.966121  | -0.516156 | C                 | -2.732254 | -0.056463    | 2.951620  |
| C | -0.407656 | 2.540594  | -2.405352 | C                 | 0.406448  | -0.538717    | 1.250439  |
| H | 2.475590  | 6.719034  | 2.772313  | C                 | -0.077982 | 0.457008     | 3.438552  |
| N | 1.608013  | 1.068179  | -1.236222 | C                 | -2.350901 | 0.390014     | 4.227923  |
| H | 1.221718  | 2.076718  | 0.520791  | H                 | -3.776636 | -0.214532    | 2.704157  |
| H | -1.211120 | 3.118732  | -2.854394 | C                 | 1.754364  | -0.294162    | 1.438255  |
| C | 1.320939  | 0.899853  | -2.534687 | H                 | 0.042663  | -1.046270    | 0.362386  |
| H | 1.939459  | 0.190983  | -3.072899 | C                 | 1.300338  | 0.759051     | 3.578154  |
| C | 2.528334  | -0.770656 | 2.406591  | C                 | -1.029601 | 0.699351     | 4.449525  |
| H | 3.604735  | -0.854453 | 2.527804  | H                 | -3.108179 | 0.538496     | 4.989884  |
| H | -1.654735 | -4.764686 | 3.129774  | H                 | -0.703838 | 1.120333     | 5.397408  |
| H | 1.350429  | -4.618327 | 0.077123  | N                 | -1.868020 | -0.259173    | 1.973468  |
| O | -3.343350 | -3.077524 | 1.818944  | H                 | 1.641443  | 1.245556     | 4.488515  |
| O | -0.067974 | -2.905647 | -1.491344 | C                 | -2.657131 | 2.917720     | 0.120166  |
| C | -3.824117 | -3.535314 | 3.057427  | C                 | -1.529466 | 3.545630     | -0.763099 |
| H | -3.169582 | -3.226005 | 3.884960  | H                 | -3.495465 | 3.627083     | 0.060881  |
| H | -4.808400 | -3.080695 | 3.185666  | C                 | -2.232622 | 2.828997     | 1.570523  |
| H | -3.928533 | -4.627813 | 3.072897  | C                 | -0.721422 | 4.616183     | -0.052300 |
| C | 1.114496  | -3.377181 | -2.103206 | H                 | -2.058642 | 4.022281     | -1.596014 |
| H | 1.195114  | -2.834791 | -3.046917 | H                 | -3.033091 | 2.356829     | 2.147257  |
| H | 1.998374  | -3.177851 | -1.486370 | H                 | -1.339642 | 2.202546     | 1.664067  |
| H | 1.046770  | -4.452829 | -2.308139 | C                 | -1.935037 | 4.212199     | 2.122922  |
| C | 1.082578  | 5.260428  | 0.045699  | C                 | -0.900474 | 4.930744     | 1.299705  |

|    |           |           |           |
|----|-----------|-----------|-----------|
| H  | -2.863493 | 4.802696  | 2.142424  |
| H  | -1.595172 | 4.140362  | 3.163513  |
| C  | -0.107296 | 5.926440  | 1.880146  |
| C  | 1.024007  | 6.301944  | -0.205944 |
| C  | -0.640731 | 2.494275  | -1.384779 |
| C  | 0.847552  | 6.611205  | 1.142135  |
| H  | -0.247077 | 6.159119  | 2.934040  |
| H  | 1.768364  | 6.826978  | -0.797987 |
| C  | 0.474488  | 1.971295  | -0.733802 |
| C  | -0.938137 | 1.985444  | -2.650541 |
| H  | 1.455469  | 7.378253  | 1.614025  |
| N  | 1.241542  | 1.013077  | -1.266774 |
| H  | 0.771421  | 2.334949  | 0.245335  |
| H  | -1.800071 | 2.374292  | -3.187004 |
| C  | 0.941540  | 0.520926  | -2.478129 |
| H  | 1.594926  | -0.263997 | -2.849202 |
| C  | 2.189527  | 0.416774  | 2.595417  |
| H  | 3.254041  | 0.600837  | 2.717866  |
| H  | -1.069493 | -4.559859 | 3.632214  |
| H  | 1.446731  | -4.684689 | 0.160357  |
| O  | -3.024500 | -3.121802 | 2.399779  |
| O  | -0.209404 | -3.102387 | -1.309135 |
| C  | -3.288136 | -3.424136 | 3.746835  |
| H  | -2.547299 | -2.965356 | 4.416577  |
| H  | -4.274450 | -3.008244 | 3.961461  |
| H  | -3.311124 | -4.507314 | 3.922957  |
| C  | 0.952380  | -3.497065 | -2.011876 |
| H  | 0.861538  | -3.063578 | -3.007435 |
| H  | 1.864230  | -3.096377 | -1.556500 |
| H  | 1.011485  | -4.589112 | -2.091860 |
| C  | 0.244500  | 5.313453  | -0.788844 |
| H  | 0.385593  | 5.063318  | -1.838114 |
| C  | -0.146039 | 0.987579  | -3.200636 |
| H  | -0.362945 | 0.568287  | -4.177713 |
| Pd | 2.834447  | -0.054007 | -0.333202 |
| C  | 2.986427  | -1.785186 | 1.187916  |
| C  | 4.117508  | -1.517240 | 0.351799  |
| H  | 3.174875  | -1.763579 | 2.257435  |
| H  | 2.291961  | -2.561499 | 0.878890  |
| H  | 4.269376  | -2.094542 | -0.557490 |
| C  | 5.299954  | -0.869131 | 0.951786  |
| O  | 5.332238  | -0.355437 | 2.056179  |
| O  | 6.338064  | -0.889865 | 0.110674  |
| C  | 7.496185  | -0.160553 | 0.529920  |
| C  | 8.449972  | -0.127749 | -0.639584 |
| H  | 7.931099  | -0.656169 | 1.404995  |
| H  | 7.187537  | 0.843744  | 0.836938  |
| H  | 9.358935  | 0.418602  | -0.367713 |
| H  | 8.732949  | -1.140946 | -0.941585 |
| H  | 7.986766  | 0.372786  | -1.495579 |
| C  | 4.172417  | -0.540158 | -2.796982 |
| O  | 3.491461  | -1.573996 | -2.811909 |
| O  | 4.075699  | 0.402091  | -1.922949 |

|                         |              |           |           |
|-------------------------|--------------|-----------|-----------|
| C                       | 5.244686     | -0.300766 | -3.841460 |
| H                       | 5.260262     | 0.747645  | -4.150538 |
| H                       | 6.219804     | -0.528967 | -3.395661 |
| H                       | 5.090050     | -0.952709 | -4.703260 |
| 104                     |              |           |           |
| cis-T25-Q_C7_TSIII Eopt | -2905.023813 |           |           |
| Pd                      | -2.508123    | 0.106509  | 0.271134  |
| C                       | -4.133999    | 1.787755  | -1.314858 |
| C                       | -4.092226    | -0.458314 | -2.006503 |
| C                       | -5.071357    | 2.106253  | -2.288044 |
| C                       | -5.020444    | -0.205035 | -3.007083 |
| H                       | -5.420416    | 3.131096  | -2.353725 |
| H                       | -5.334249    | -1.027688 | -3.640526 |
| N                       | -3.677092    | 0.540009  | -1.230436 |
| H                       | -6.241111    | 1.318076  | -3.914227 |
| C                       | -5.510482    | 1.093865  | -3.142131 |
| N                       | -2.731555    | -1.761761 | -0.563220 |
| N                       | -2.583251    | 2.190401  | 0.454769  |
| C                       | -3.486370    | -1.798307 | -1.694838 |
| C                       | -3.467218    | 2.766661  | -0.388625 |
| O                       | -3.711876    | -2.759190 | -2.419978 |
| O                       | -3.686959    | 3.973362  | -0.540238 |
| C                       | -1.962104    | -2.889135 | -0.262354 |
| C                       | -2.161376    | -3.594891 | 0.935568  |
| C                       | -0.933389    | -3.305832 | -1.128767 |
| C                       | -1.345352    | -4.678590 | 1.269718  |
| C                       | -0.140524    | -4.411728 | -0.816448 |
| C                       | -0.349196    | -5.077065 | 0.386440  |
| H                       | 0.275150     | -5.929647 | 0.638233  |
| C                       | -1.610787    | 3.114760  | 1.026199  |
| C                       | -0.756680    | 3.780661  | -0.097295 |
| H                       | -2.152347    | 3.938627  | 1.513583  |
| C                       | -0.718973    | 2.444001  | 2.054607  |
| C                       | 0.434789     | 4.544824  | 0.440356  |
| H                       | -1.424541    | 4.491674  | -0.594169 |
| H                       | -1.343613    | 1.984095  | 2.825618  |
| H                       | -0.150839    | 1.632742  | 1.585680  |
| C                       | 0.238497     | 3.431008  | 2.708445  |
| C                       | 0.916912     | 4.362278  | 1.739330  |
| H                       | -0.310577    | 4.035613  | 3.445742  |
| H                       | 1.004312     | 2.877084  | 3.263295  |
| C                       | 2.039366     | 5.088411  | 2.153084  |
| C                       | 2.196518     | 6.160027  | 0.006041  |
| C                       | -0.337729    | 2.767519  | -1.134705 |
| C                       | 2.675853     | 5.981959  | 1.304212  |
| H                       | 2.418389     | 4.935650  | 3.161307  |
| H                       | 2.686516     | 6.853665  | -0.671636 |
| C                       | 0.736420     | 1.913449  | -0.900107 |
| C                       | -1.033584    | 2.604839  | -2.331996 |
| H                       | 3.548220     | 6.531732  | 1.647181  |
| N                       | 1.072102     | 0.923249  | -1.737680 |
| H                       | 1.346872     | 1.999777  | -0.005900 |
| H                       | -1.867675    | 3.264202  | -2.559319 |

|    |           |           |           |               |           |              |           |
|----|-----------|-----------|-----------|---------------|-----------|--------------|-----------|
| C  | 0.378330  | 0.750161  | -2.869550 | H             | -2.895718 | -0.605265    | 5.235826  |
| H  | 0.683079  | -0.077141 | -3.499227 | H             | -3.410693 | 0.239738     | 2.947287  |
| H  | -1.489536 | -5.219378 | 2.197320  | C             | 1.849753  | -2.609618    | 2.539177  |
| H  | 0.637289  | -4.747285 | -1.493391 | H             | 2.782847  | -3.158542    | 2.626340  |
| O  | -3.172012 | -3.142029 | 1.717059  | 96            |           |              |           |
| O  | -0.760541 | -2.546722 | -2.235668 | cis-T25-Q_IN1 | Eopt      | -2767.377805 |           |
| C  | -3.459200 | -3.863147 | 2.889829  | Pd            | -2.448264 | 0.685114     | 0.164664  |
| H  | -2.612148 | -3.855926 | 3.588122  | C             | -3.464308 | 2.737465     | -1.511150 |
| H  | -4.307516 | -3.356647 | 3.353312  | C             | -4.471358 | 0.632786     | -1.807232 |
| H  | -3.734766 | -4.901779 | 2.665447  | C             | -4.280260 | 3.304038     | -2.480995 |
| C  | 0.062279  | -3.061028 | -3.257830 | C             | -5.315193 | 1.135640     | -2.787475 |
| H  | 1.119779  | -3.082886 | -2.960582 | H             | -4.160365 | 4.357843     | -2.707701 |
| H  | -0.257838 | -4.066892 | -3.554315 | H             | -6.020708 | 0.459442     | -3.258204 |
| H  | -0.054939 | -2.384224 | -4.105999 | N             | -3.592231 | 1.445332     | -1.222566 |
| C  | 1.086430  | 5.442332  | -0.413988 | H             | -5.864514 | 2.905437     | -3.882250 |
| H  | 0.708180  | 5.570477  | -1.426256 | C             | -5.213807 | 2.486859     | -3.119682 |
| C  | -0.670674 | 1.589478  | -3.210800 | N             | -3.548672 | -0.956537    | -0.314241 |
| H  | -1.204681 | 1.433816  | -4.142571 | N             | -1.725820 | 2.659681     | 0.123731  |
| Pd | 2.530269  | -0.366537 | -0.954802 | C             | -4.440535 | -0.794774    | -1.324049 |
| H  | 1.549498  | -1.575076 | -1.228358 | C             | -2.377594 | 3.448974     | -0.756245 |
| C  | 3.761688  | 1.730926  | 0.473072  | O             | -5.171727 | -1.636707    | -1.828520 |
| O  | 2.957733  | 1.357873  | 1.341329  | O             | -2.140941 | 4.634300     | -1.019298 |
| O  | 3.861250  | 1.221390  | -0.706854 | C             | -3.305662 | -2.234241    | 0.198833  |
| C  | 4.690603  | 2.899115  | 0.730446  | C             | -3.733194 | -2.570858    | 1.492059  |
| H  | 4.799445  | 3.065168  | 1.804095  | C             | -2.540468 | -3.160906    | -0.529842 |
| H  | 5.665080  | 2.733324  | 0.264068  | C             | -3.391005 | -3.800908    | 2.058299  |
| H  | 4.250046  | 3.799226  | 0.287616  | C             | -2.201066 | -4.395012    | 0.028927  |
| C  | -0.535242 | -1.185627 | 2.261131  | C             | -2.628033 | -4.695899    | 1.316668  |
| N  | -1.700974 | -0.497086 | 2.099396  | H             | -2.360340 | -5.654038    | 1.753301  |
| C  | -2.498858 | -0.317050 | 3.138183  | C             | -0.473200 | -1.248202    | 1.399342  |
| C  | -2.202924 | -0.797511 | 4.423897  | C             | -1.911320 | -0.217942    | 2.909420  |
| C  | -1.040433 | -1.504803 | 4.616585  | C             | 0.023893  | -1.368183    | 0.085644  |
| C  | -0.172304 | -1.724430 | 3.527988  | C             | 0.031116  | -2.102542    | 2.422381  |
| C  | 1.041755  | -2.444520 | 3.633557  | C             | -1.457329 | -1.016124    | 3.972089  |
| C  | 1.496509  | -2.052304 | 1.283349  | H             | -2.686937 | 0.524349     | 3.062640  |
| C  | 0.319736  | -1.353282 | 1.158163  | H             | -0.384016 | -0.721321    | -0.685899 |
| H  | 0.038637  | -0.897328 | 0.213718  | C             | 1.026523  | -3.054511    | 2.095510  |
| C  | 2.420744  | -2.246313 | 0.131198  | C             | -0.491859 | -1.960566    | 3.724250  |
| C  | 3.725862  | -1.701031 | 0.143406  | H             | -1.878751 | -0.875391    | 4.961525  |
| C  | 4.726378  | -2.280953 | -0.780114 | H             | -0.121501 | -2.604107    | 4.518210  |
| O  | 4.482634  | -3.114213 | -1.630603 | N             | -1.439925 | -0.322116    | 1.679840  |
| O  | 5.938156  | -1.757928 | -0.568698 | H             | 1.409771  | -3.699434    | 2.881835  |
| C  | 6.958864  | -2.177728 | -1.481377 | Pd            | 3.801682  | -0.760845    | -0.721069 |
| C  | 8.210936  | -1.407497 | -1.139224 | C             | 4.375463  | -3.168097    | -2.058841 |
| H  | 9.022615  | -1.693374 | -1.816080 | O             | 4.335533  | -4.132862    | -2.790475 |
| H  | 8.528117  | -1.614354 | -0.112398 | O             | 3.479566  | -2.196699    | -2.095915 |
| H  | 8.039088  | -0.331330 | -1.237236 | N             | 5.184953  | -1.961359    | -0.112606 |
| H  | 6.619561  | -1.978529 | -2.503150 | C             | 5.872809  | -1.115466    | 0.635734  |
| H  | 7.098689  | -3.259985 | -1.384916 | C             | 7.262527  | -1.368301    | 1.124768  |
| H  | 4.073694  | -1.104568 | 0.981954  | H             | 7.975261  | -0.837178    | 0.483230  |
| H  | 2.289301  | -3.164475 | -0.441832 | H             | 7.505803  | -2.434285    | 1.108808  |
| H  | 1.326244  | -2.856411 | 4.598014  | H             | 7.370772  | -0.976602    | 2.139258  |
| H  | -0.778633 | -1.897076 | 5.596159  | O             | 5.251852  | -0.036796    | 0.903967  |

C 5.521539 -3.015758 -1.029243  
 H 5.649219 -3.979400 -0.521582  
 C -0.624227 3.316384 0.801080  
 C 0.556983 3.642819 -0.156416  
 H -0.979294 4.297208 1.153309  
 C -0.122608 2.530375 1.996471  
 C 1.749455 4.203538 0.589548  
 H 0.174681 4.413588 -0.834687  
 H -0.972567 2.242071 2.622134  
 H 0.354146 1.601589 1.658238  
 C 0.853601 3.368635 2.809574  
 C 1.912960 4.036574 1.969675  
 H 0.291506 4.148250 3.345264  
 H 1.329829 2.753651 3.583129  
 C 3.071102 4.531720 2.579741  
 C 3.883089 5.359074 0.473093  
 C 0.942916 2.457523 -1.006652  
 C 4.051147 5.185265 1.846468  
 H 3.199177 4.394186 3.651543  
 H 4.640667 5.871435 -0.113185  
 C 1.978351 1.598573 -0.646745  
 C 0.264857 2.170493 -2.194539  
 H 4.944551 5.556223 2.341062  
 N 2.327697 0.533222 -1.378121  
 H 2.565703 1.774932 0.249988  
 H -0.526532 2.834870 -2.529220  
 C 1.669213 0.258802 -2.513055  
 H 2.004600 -0.622851 -3.051181  
 C 1.494559 -3.152993 0.810165  
 H 2.264729 -3.874900 0.556538  
 H -3.714775 -4.066307 3.057687  
 H -1.602189 -5.110110 -0.522179  
 O -4.461388 -1.618415 2.129607  
 O -2.149075 -2.747108 -1.755423  
 C -4.982897 -1.941742 3.394033  
 H -4.184813 -2.127785 4.126567  
 H -5.567525 -1.075558 3.709385  
 H -5.637054 -2.821758 3.347179  
 C -1.420945 -3.653974 -2.548924  
 H -1.225672 -3.139079 -3.490849  
 H -0.465538 -3.923917 -2.080862  
 H -1.999213 -4.565162 -2.747126  
 C 2.740290 4.868747 -0.141680  
 H 2.604917 4.992078 -1.214263  
 C 0.626858 1.061708 -2.951063  
 H 0.114623 0.821630 -3.876924  
 H 6.444697 -2.813106 -1.591776  
 C 0.984139 -2.307710 -0.200767  
 H 1.378703 -2.403830 -1.207184  
 82  
 cis-T25-Q\_T-Pd-SM Eopt -2205.209402  
 Pd 0.545931 0.692252 -0.654739  
 C -0.214300 3.238152 -1.632634

C 2.027377 3.081236 -0.926483  
 C -0.042538 4.566943 -1.997080  
 C 2.263877 4.404801 -1.269689  
 H -0.892667 5.108856 -2.396926  
 H 3.251379 4.817212 -1.092755  
 N 0.815637 2.564045 -1.126852  
 H 1.375280 6.182710 -2.095169  
 C 1.214759 5.144869 -1.817005  
 N 2.504446 0.900091 -0.134064  
 N -1.379941 1.184044 -1.279566  
 C 3.020564 2.146470 -0.280252  
 C -1.509621 2.472681 -1.670754  
 O 4.130070 2.549158 0.045159  
 O -2.547670 3.061401 -1.987101  
 C 3.184957 -0.059756 0.618517  
 C 3.696008 -1.212168 -0.000523  
 C 3.240012 0.040145 2.019125  
 C 4.244571 -2.246342 0.762537  
 C 3.801091 -0.984420 2.786005  
 C 4.293344 -2.115996 2.145689  
 H 4.727607 -2.915485 2.739538  
 C 0.612217 -2.326008 -1.015660  
 C 0.465172 -1.568346 1.177850  
 C 0.654244 -2.043773 -2.398660  
 C 0.701999 -3.673346 -0.569716  
 C 0.537259 -2.873363 1.695246  
 H 0.389367 -0.713434 1.839100  
 H 0.599489 -1.004885 -2.711740  
 C 0.825900 -4.706650 -1.530783  
 C 0.658782 -3.922050 0.821883  
 H 0.490045 -3.014567 2.768459  
 H 0.721314 -4.946508 1.180058  
 N 0.485708 -1.305536 -0.115692  
 H 0.891987 -5.735106 -1.185194  
 C -2.637863 0.479839 -1.142973  
 C -3.372049 0.847614 0.173970  
 H -3.298622 0.833836 -1.947454  
 C -2.516137 -1.027475 -1.257706  
 C -4.668138 0.073784 0.302716  
 H -3.618029 1.913258 0.083460  
 H -1.891678 -1.288377 -2.117713  
 H -2.025187 -1.431819 -0.365191  
 C -3.902912 -1.637062 -1.412824  
 C -4.901852 -1.108026 -0.412227  
 H -4.276142 -1.419920 -2.424774  
 H -3.850884 -2.730623 -1.338415  
 C -6.106503 -1.792368 -0.213460  
 C -6.837165 -0.143047 1.375825  
 C -2.499202 0.693780 1.401278  
 C -7.068903 -1.322438 0.669045  
 H -6.284483 -2.711985 -0.767802  
 H -7.582242 0.238495 2.068484  
 C -2.534514 -0.441551 2.219679

|   |           |           |           |   |           |           |           |
|---|-----------|-----------|-----------|---|-----------|-----------|-----------|
| C | -1.610874 | 1.705504  | 1.775778  | H | 3.519755  | -3.283899 | -1.705446 |
| H | -7.995960 | -1.872250 | 0.807470  | H | 3.884299  | -2.206913 | -3.077502 |
| N | -1.794521 | -0.609636 | 3.318980  | H | 5.139520  | -2.529522 | -1.848938 |
| H | -3.217435 | -1.254333 | 1.979933  | C | 2.794234  | 1.357518  | 3.926157  |
| H | -1.551343 | 2.616529  | 1.187073  | H | 2.340540  | 2.329006  | 4.129996  |
| C | -0.963963 | 0.379207  | 3.655161  | H | 2.259331  | 0.583150  | 4.493635  |
| H | -0.379394 | 0.227627  | 4.562121  | H | 3.844134  | 1.376971  | 4.244556  |
| C | 0.855759  | -4.411604 | -2.871213 | C | -5.644585 | 0.540796  | 1.189303  |
| H | 0.946827  | -5.208636 | -3.603212 | H | -5.450871 | 1.456881  | 1.743395  |
| H | 4.637833  | -3.138818 | 0.290515  | C | -0.828188 | 1.549609  | 2.914103  |
| H | 3.850947  | -0.910606 | 3.866108  | H | -0.129089 | 2.321163  | 3.220257  |
| O | 3.592029  | -1.237521 | -1.349468 | C | 0.770256  | -3.069147 | -3.305012 |
| O | 2.680245  | 1.158249  | 2.539652  | H | 0.799596  | -2.846162 | -4.367548 |
| C | 4.064472  | -2.382473 | -2.016210 |   |           |           |           |

#### 4. X-ray Crystallographic Data

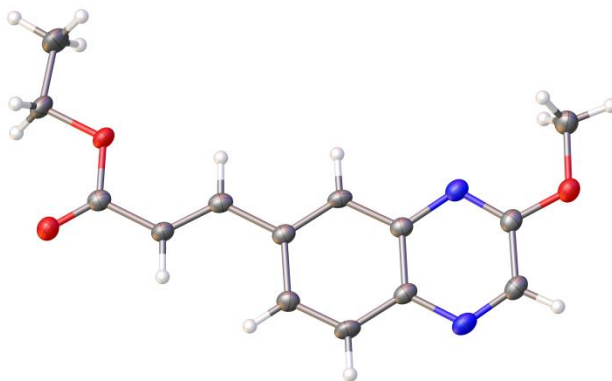

**Table S13.** Crystal data and structure refinement for **2ab**

|                                 |                                                               |                 |
|---------------------------------|---------------------------------------------------------------|-----------------|
| Identification code             | yu135_0m_a                                                    |                 |
| No. in paper                    | <b>2ab</b>                                                    |                 |
| CCDC                            | 2078170                                                       |                 |
| Empirical formula               | C <sub>14</sub> H <sub>14</sub> N <sub>2</sub> O <sub>3</sub> |                 |
| Formula weight                  | 258.27                                                        |                 |
| Temperature                     | 100.0 K                                                       |                 |
| Wavelength                      | 1.54178 Å                                                     |                 |
| Crystal system                  | Monoclinic                                                    |                 |
| Space group                     | P 1 21/c 1                                                    |                 |
| Unit cell dimensions            | a = 15.4115(4) Å                                              | α = 90°.        |
|                                 | b = 12.0140(3) Å                                              | β = 92.765(2)°. |
|                                 | c = 20.1556(5) Å                                              | γ = 90°.        |
| Volume                          | 3727.54(16) Å <sup>3</sup>                                    |                 |
| Z                               | 12                                                            |                 |
| Density (calculated)            | 1.381 Mg/m <sup>3</sup>                                       |                 |
| Absorption coefficient          | 0.813 mm <sup>-1</sup>                                        |                 |
| F(000)                          | 1632                                                          |                 |
| Crystal size                    | 0.18 x 0.07 x 0.07 mm <sup>3</sup>                            |                 |
| Theta range for data collection | 2.871 to 70.166°.                                             |                 |
| Index ranges                    | -18 ≤ h ≤ 18, -14 ≤ k ≤ 14, -24 ≤ l ≤ 24                      |                 |
| Reflections collected           | 80899                                                         |                 |
| Independent reflections         | 7008 [R(int) = 0.0819]                                        |                 |
| Completeness to theta = 67.679° | 99.0 %                                                        |                 |



|                                   |                                             |
|-----------------------------------|---------------------------------------------|
| Absorption correction             | Semi-empirical from equivalents             |
| Max. and min. transmission        | 0.5220 and 0.3247                           |
| Refinement method                 | Full-matrix least-squares on F <sup>2</sup> |
| Data / restraints / parameters    | 7008 / 0 / 520                              |
| Goodness-of-fit on F <sup>2</sup> | 1.089                                       |
| Final R indices [I>2sigma(I)]     | R1 = 0.0523, wR2 = 0.1269                   |
| R indices (all data)              | R1 = 0.0677, wR2 = 0.1346                   |
| Largest diff. peak and hole       | 0.227 and -0.211 e.Å <sup>-3</sup>          |

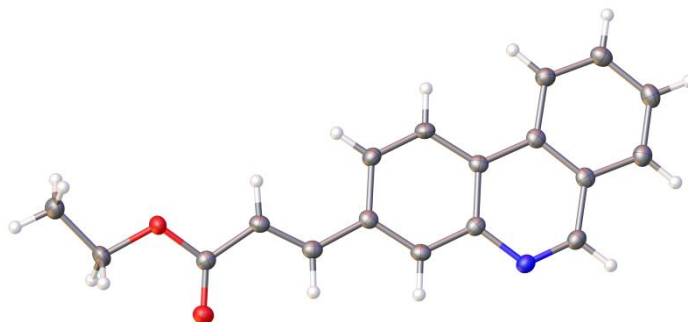

**Table S14.** Crystal data and structure refinement for **3p**

|                        |                                                  |                 |
|------------------------|--------------------------------------------------|-----------------|
| Identification code    | yu137_0m_a                                       |                 |
| No. in paper           | <b>3p</b>                                        |                 |
| CCDC                   | 2078172                                          |                 |
| Empirical formula      | C <sub>18</sub> H <sub>15</sub> N O <sub>2</sub> |                 |
| Formula weight         | 277.31                                           |                 |
| Temperature            | 100 K                                            |                 |
| Wavelength             | 0.71073 Å                                        |                 |
| Crystal system         | Triclinic                                        |                 |
| Space group            | P-1                                              |                 |
| Unit cell dimensions   | a = 7.4675(4) Å                                  | α = 86.655(2)°. |
|                        | b = 11.4554(6) Å                                 | β = 83.006(2)°. |
|                        | c = 15.7719(9) Å                                 | λ = 84.612(2)°. |
| Volume                 | 1331.72(13) Å <sup>3</sup>                       |                 |
| Z                      | 4                                                |                 |
| Density (calculated)   | 1.383 Mg/m <sup>3</sup>                          |                 |
| Absorption coefficient | 0.090 mm <sup>-1</sup>                           |                 |
| F(000)                 | 584                                              |                 |

|                                   |                                             |
|-----------------------------------|---------------------------------------------|
| Crystal size                      | 0.22 x 0.2 x 0.075 mm <sup>3</sup>          |
| Theta range for data collection   | 2.261 to 26.427°.                           |
| Index ranges                      | -9<=h<=9, -14<=k<=14, -19<=l<=19            |
| Reflections collected             | 45896                                       |
| Independent reflections           | 5485 [R(int) = 0.0801]                      |
| Completeness to theta = 25.242°   | 99.9 %                                      |
| Absorption correction             | Semi-empirical from equivalents             |
| Max. and min. transmission        | 0.4908 and 0.4180                           |
| Refinement method                 | Full-matrix least-squares on F <sup>2</sup> |
| Data / restraints / parameters    | 5485 / 0 / 381                              |
| Goodness-of-fit on F <sup>2</sup> | 1.015                                       |
| Final R indices [I>2sigma(I)]     | R1 = 0.0391, wR2 = 0.0900                   |
| R indices (all data)              | R1 = 0.0619, wR2 = 0.1026                   |
| Largest diff. peak and hole       | 0.209 and -0.210 e.Å <sup>-3</sup>          |

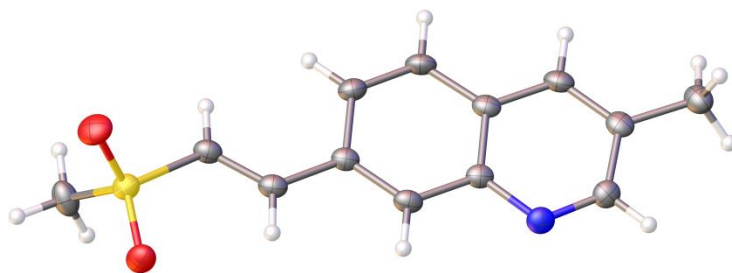

**Table S15.** Crystal data and structure refinement for **3u**

|                      |                                                    |
|----------------------|----------------------------------------------------|
| Identification code  | yu136                                              |
| No. in paper         | <b>3u</b>                                          |
| CCDC                 | 2078171                                            |
| Empirical formula    | C <sub>13</sub> H <sub>13</sub> N O <sub>2</sub> S |
| Formula weight       | 247.30                                             |
| Temperature          | 100.0 K                                            |
| Wavelength           | 0.71073 Å                                          |
| Crystal system       | Monoclinic                                         |
| Space group          | P 1 21/c 1                                         |
| Unit cell dimensions | a = 12.6345(9) Å      α = 90°.                     |
|                      | b = 8.5567(5) Å      β = 104.257(3)°.              |
|                      | c = 11.2183(9) Å      γ = 90°.                     |

|                                   |                                             |
|-----------------------------------|---------------------------------------------|
| Volume                            | 1175.45(14) Å <sup>3</sup>                  |
| Z                                 | 4                                           |
| Density (calculated)              | 1.397 Mg/m <sup>3</sup>                     |
| Absorption coefficient            | 0.263 mm <sup>-1</sup>                      |
| F(000)                            | 520                                         |
| Crystal size                      | 0.2 x 0.2 x 0.2 mm <sup>3</sup>             |
| Theta range for data collection   | 2.904 to 26.769°.                           |
| Index ranges                      | -15<=h<=15, -10<=k<=10, -14<=l<=14          |
| Reflections collected             | 20192                                       |
| Independent reflections           | 2500 [R(int) = 0.0458]                      |
| Completeness to theta = 25.242°   | 99.9 %                                      |
| Absorption correction             | Semi-empirical from equivalents             |
| Max. and min. transmission        | 0.6466 and 0.6025                           |
| Refinement method                 | Full-matrix least-squares on F <sup>2</sup> |
| Data / restraints / parameters    | 2500 / 0 / 156                              |
| Goodness-of-fit on F <sup>2</sup> | 1.063                                       |
| Final R indices [I>2sigma(I)]     | R1 = 0.0339, wR2 = 0.0810                   |
| R indices (all data)              | R1 = 0.0434, wR2 = 0.0852                   |
| Largest diff. peak and hole       | 0.296 and -0.354 e.Å <sup>-3</sup>          |

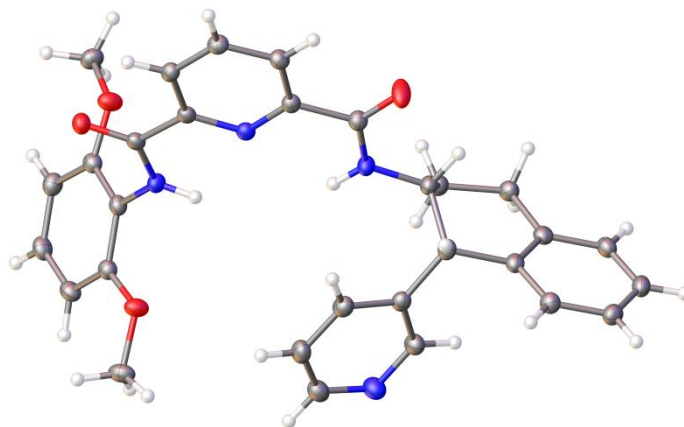

**Table S16.** Crystal data and structure refinement for *cis-T25*

|                     |                                                               |
|---------------------|---------------------------------------------------------------|
| Identification code | yu138_a                                                       |
| No. in paper        | <b><i>cis-T25</i></b>                                         |
| CCDC                | 2078173                                                       |
| Empirical formula   | C <sub>31</sub> H <sub>32</sub> N <sub>4</sub> O <sub>5</sub> |

|                                   |                                             |                       |
|-----------------------------------|---------------------------------------------|-----------------------|
| Formula weight                    | 540.60                                      |                       |
| Temperature                       | 100 K                                       |                       |
| Wavelength                        | 1.54178 Å                                   |                       |
| Crystal system                    | Orthorhombic                                |                       |
| Space group                       | Pbca                                        |                       |
| Unit cell dimensions              | a = 25.5684(9) Å                            | $\alpha = 90^\circ$ . |
|                                   | b = 7.7587(3) Å                             | $\beta = 90^\circ$ .  |
|                                   | c = 26.7946(9) Å                            | $\gamma = 90^\circ$ . |
| Volume                            | 5315.4(3) Å <sup>3</sup>                    |                       |
| Z                                 | 8                                           |                       |
| Density (calculated)              | 1.351 Mg/m <sup>3</sup>                     |                       |
| Absorption coefficient            | 0.756 mm <sup>-1</sup>                      |                       |
| F(000)                            | 2288                                        |                       |
| Crystal size                      | 0.23 x 0.08 x 0.04 mm <sup>3</sup>          |                       |
| Theta range for data collection   | 3.299 to 68.993°.                           |                       |
| Index ranges                      | -30 ≤ h ≤ 30, -9 ≤ k ≤ 9, -31 ≤ l ≤ 26      |                       |
| Reflections collected             | 86534                                       |                       |
| Independent reflections           | 4918 [R(int) = 0.0558]                      |                       |
| Completeness to theta = 67.679°   | 99.8 %                                      |                       |
| Absorption correction             | Semi-empirical from equivalents             |                       |
| Max. and min. transmission        | 0.5213 and 0.3698                           |                       |
| Refinement method                 | Full-matrix least-squares on F <sup>2</sup> |                       |
| Data / restraints / parameters    | 4918 / 0 / 366                              |                       |
| Goodness-of-fit on F <sup>2</sup> | 1.054                                       |                       |
| Final R indices [I > 2σ(I)]       | R1 = 0.0393, wR2 = 0.0968                   |                       |
| R indices (all data)              | R1 = 0.0419, wR2 = 0.0988                   |                       |
| Extinction coefficient            | 0.00023(5)                                  |                       |
| Largest diff. peak and hole       | 0.277 and -0.246 e.Å <sup>-3</sup>          |                       |

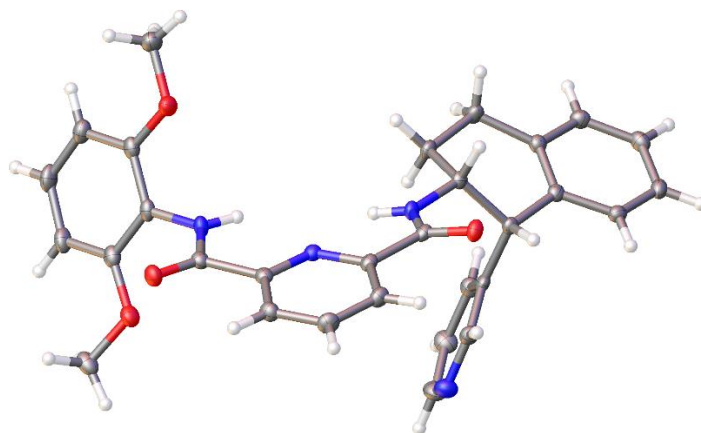

**Table S17.** Crystal data and structure refinement for **(*R,R*)-T25**

|                                 |                                                               |           |
|---------------------------------|---------------------------------------------------------------|-----------|
| Identification code             | Yu149                                                         |           |
| No. in paper                    | <b>(<i>R,R</i>)-T25</b>                                       |           |
| CCDC                            | 2132680                                                       |           |
| Empirical formula               | C <sub>30</sub> H <sub>28</sub> N <sub>4</sub> O <sub>4</sub> |           |
| Molecular formula               | C <sub>30</sub> H <sub>28</sub> N <sub>4</sub> O <sub>4</sub> |           |
| Formula weight                  | 508.56                                                        |           |
| Temperature                     | 100.15 K                                                      |           |
| Wavelength                      | 1.54178 Å                                                     |           |
| Crystal system                  | Hexagonal                                                     |           |
| Space group                     | P6 <sub>s</sub>                                               |           |
| Unit cell dimensions            | a = 11.5894(4) Å                                              | α = 90°.  |
|                                 | b = 11.5894(4) Å                                              | β = 90°.  |
|                                 | c = 31.8918(18) Å                                             | γ = 120°. |
| Volume                          | 3709.6(3) Å <sup>3</sup>                                      |           |
| Z                               | 6                                                             |           |
| Density (calculated)            | 1.366 Mg/m <sup>3</sup>                                       |           |
| Absorption coefficient          | 0.748 mm <sup>-1</sup>                                        |           |
| F(000)                          | 1608                                                          |           |
| Crystal size                    | 0.2 x 0.08 x 0.08 mm <sup>3</sup>                             |           |
| Crystal color, habit            | colorless plank                                               |           |
| Theta range for data collection | 4.405 to 70.391°.                                             |           |
| Index ranges                    | -14 ≤ h ≤ 14, -14 ≤ k ≤ 14, -38 ≤ l ≤ 38                      |           |
| Reflections collected           | 143001                                                        |           |
| Independent reflections         | 4707 [R(int) = 0.0364]                                        |           |

|                                   |                                             |
|-----------------------------------|---------------------------------------------|
| Completeness to theta = 67.500°   | 100.0 %                                     |
| Absorption correction             | Semi-empirical from equivalents             |
| Max. and min. transmission        | 0.7533 and 0.6868                           |
| Refinement method                 | Full-matrix least-squares on F <sup>2</sup> |
| Data / restraints / parameters    | 4707 / 1 / 345                              |
| Goodness-of-fit on F <sup>2</sup> | 1.043                                       |
| Final R indices [I>2sigma(I)]     | R1 = 0.0218, wR2 = 0.0560                   |
| R indices (all data)              | R1 = 0.0219, wR2 = 0.0561                   |
| Absolute structure parameter      | -0.020(19)                                  |
| Largest diff. peak and hole       | 0.168 and -0.123 e.Å <sup>-3</sup>          |

## 5. NMR Spectra

$^1\text{H}$  NMR (600 MHz,  $\text{CDCl}_3$ ) spectrum of **T1**

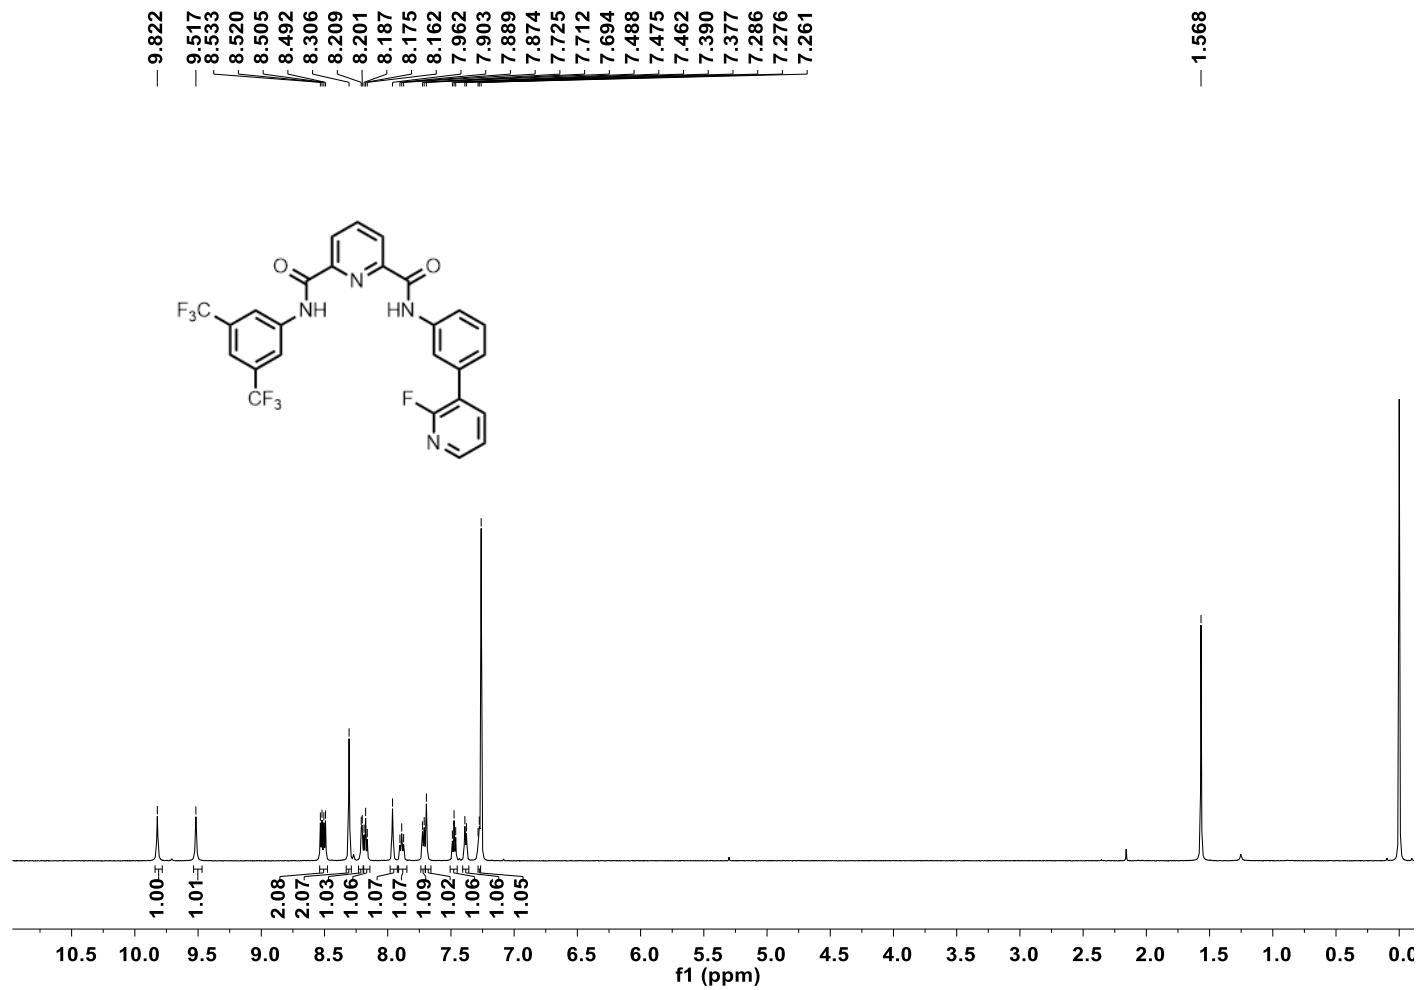

<sup>13</sup>C NMR (151 MHz, CDCl<sub>3</sub>) spectrum of **T1**

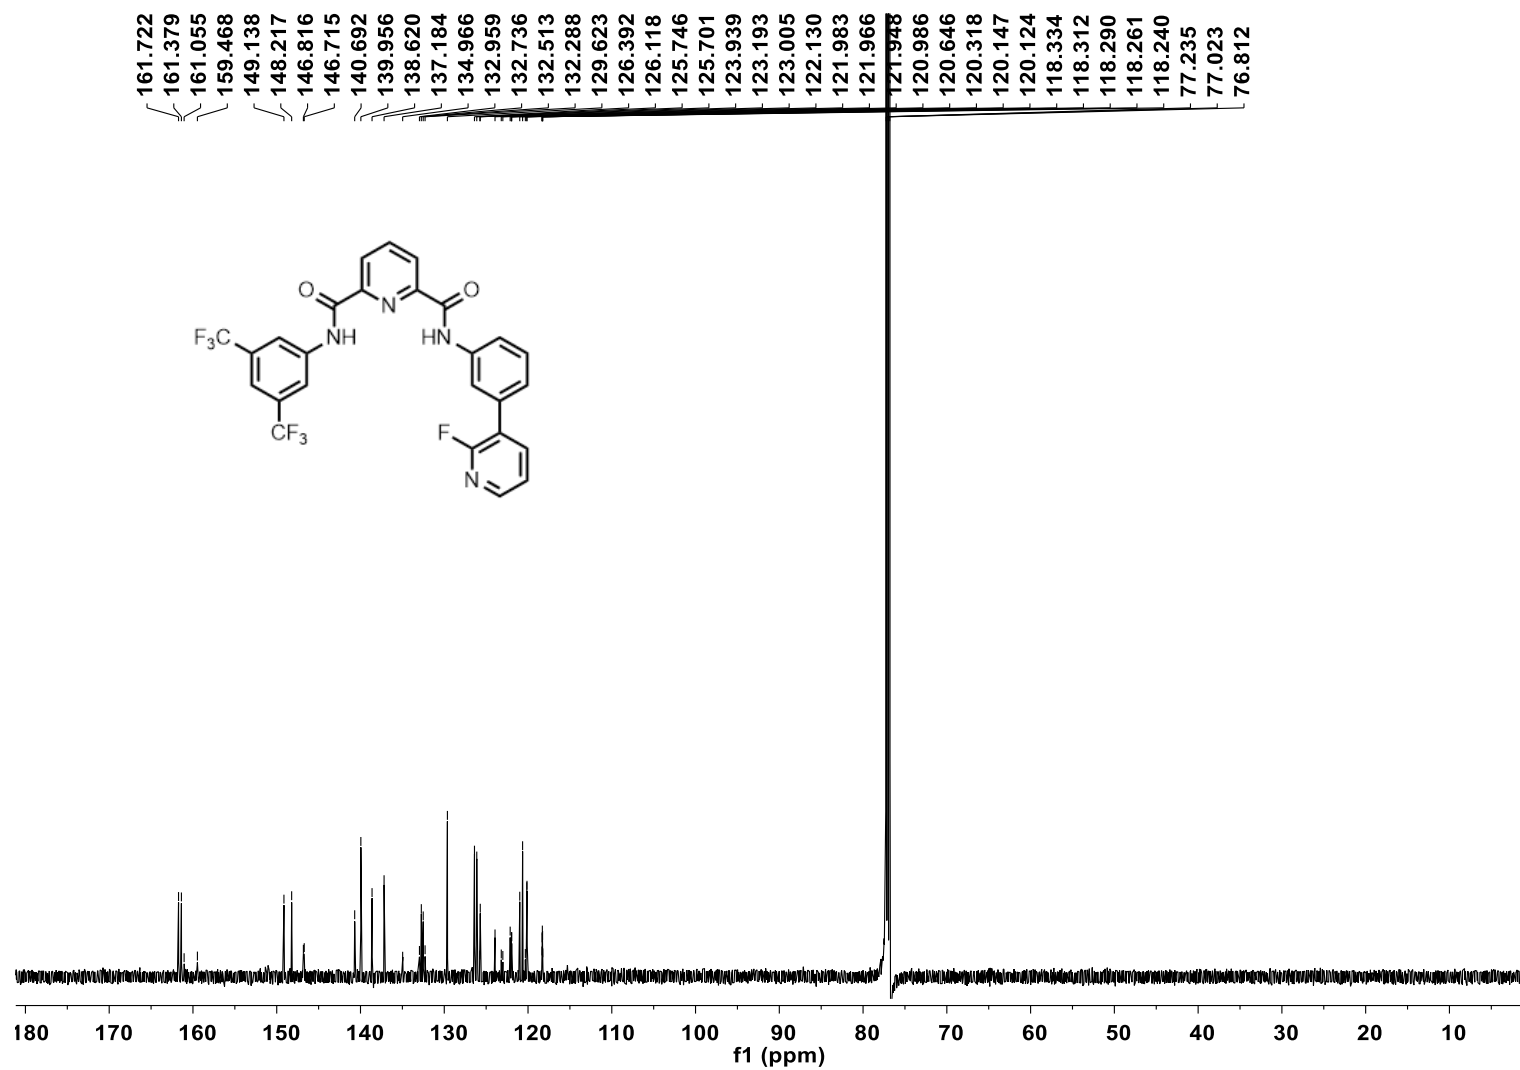



$^{19}\text{F}$  NMR (376 MHz,  $\text{CDCl}_3$ ) spectrum of **T1**

— -65.609  
— -73.592

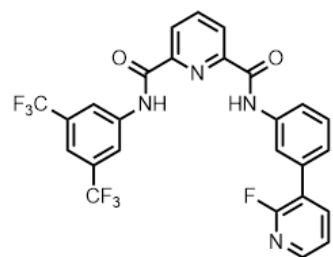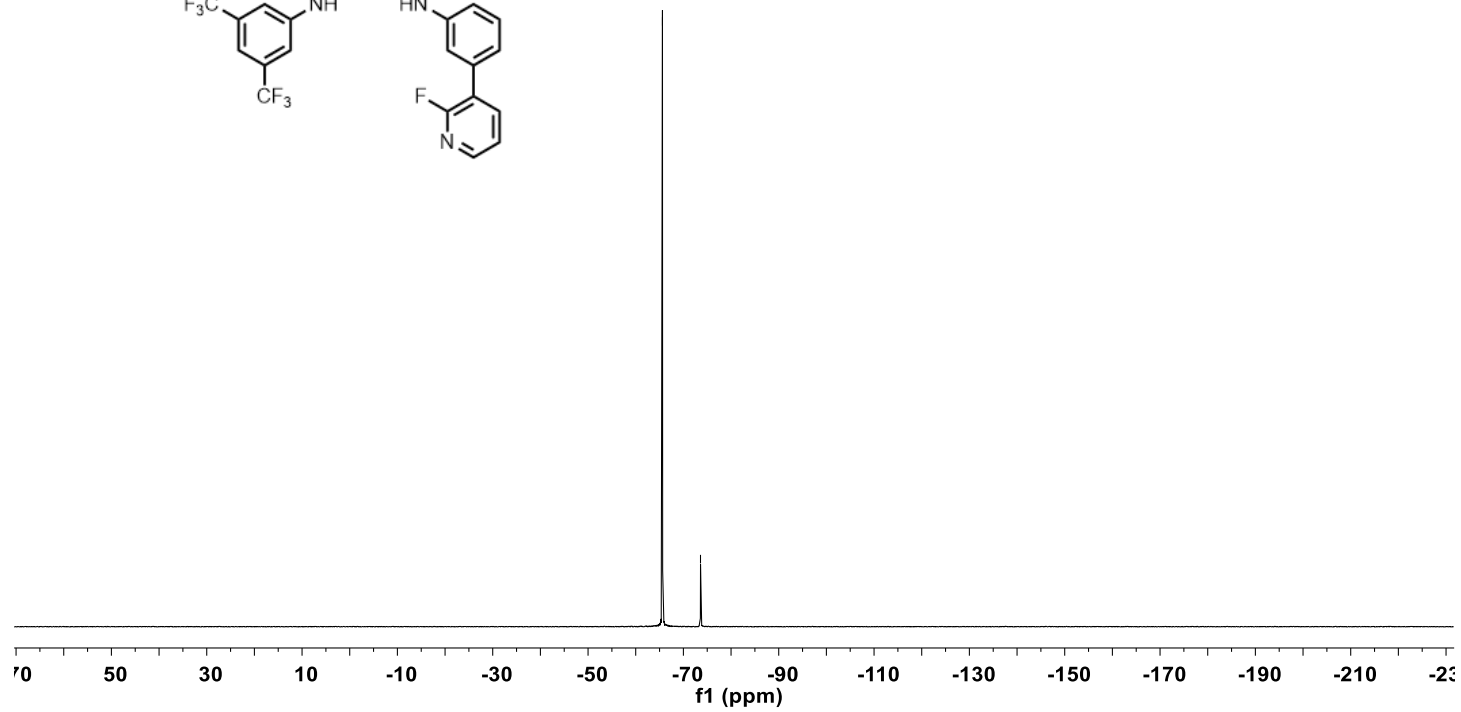

<sup>1</sup>H NMR (600 MHz, CDCl<sub>3</sub>) spectrum of T2

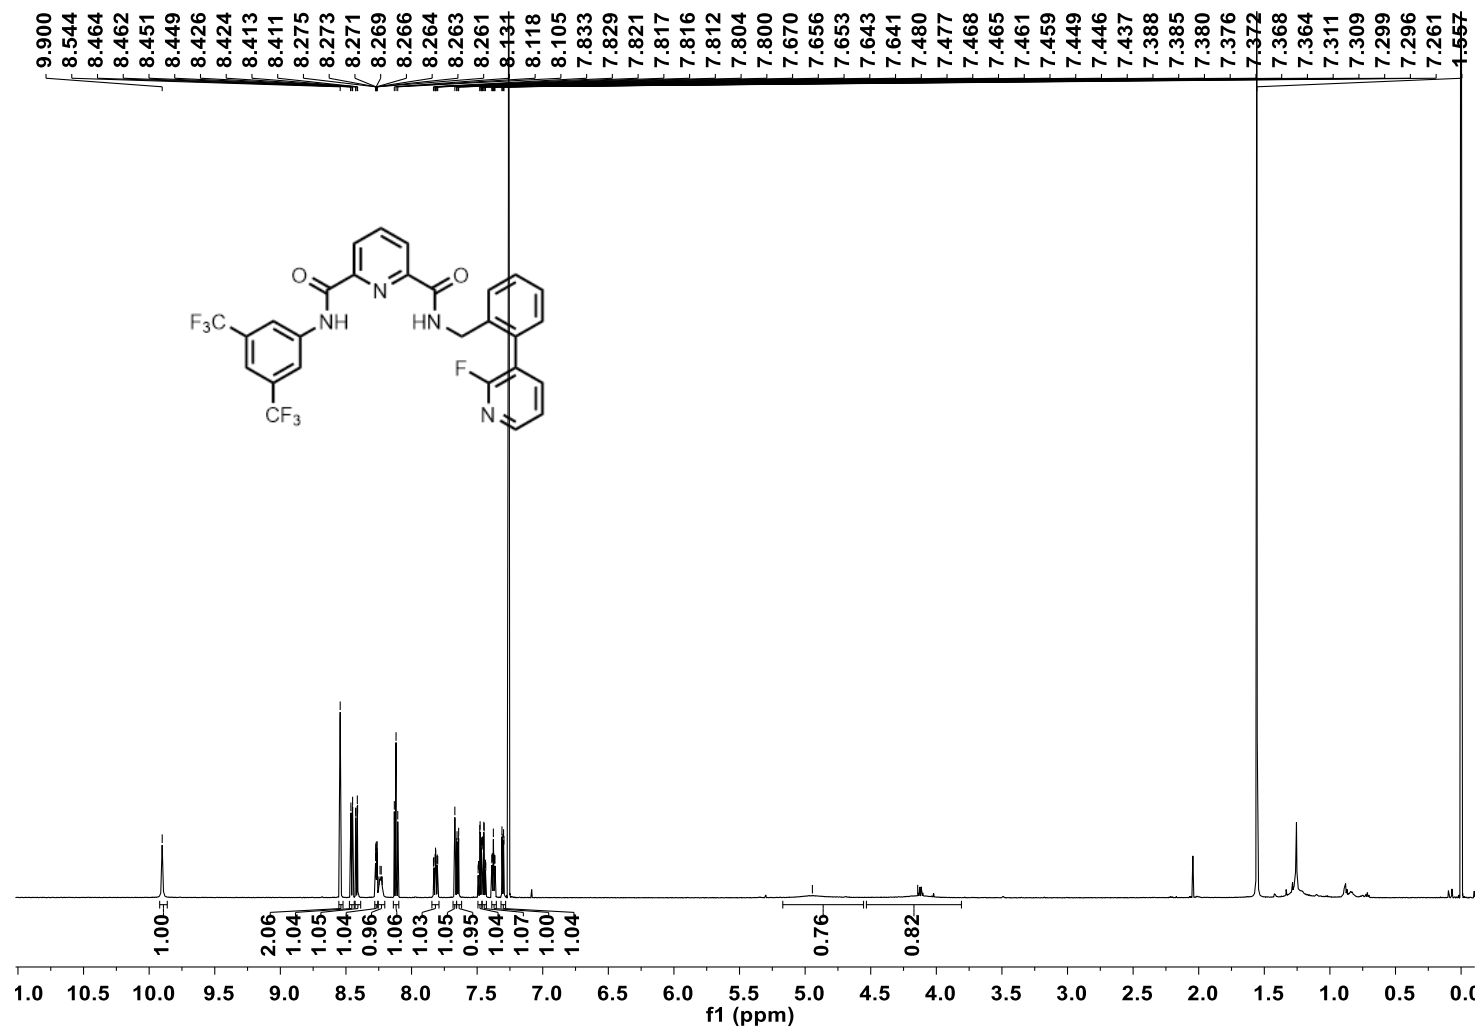

<sup>13</sup>C NMR (151 MHz, CDCl<sub>3</sub>) spectrum of T2

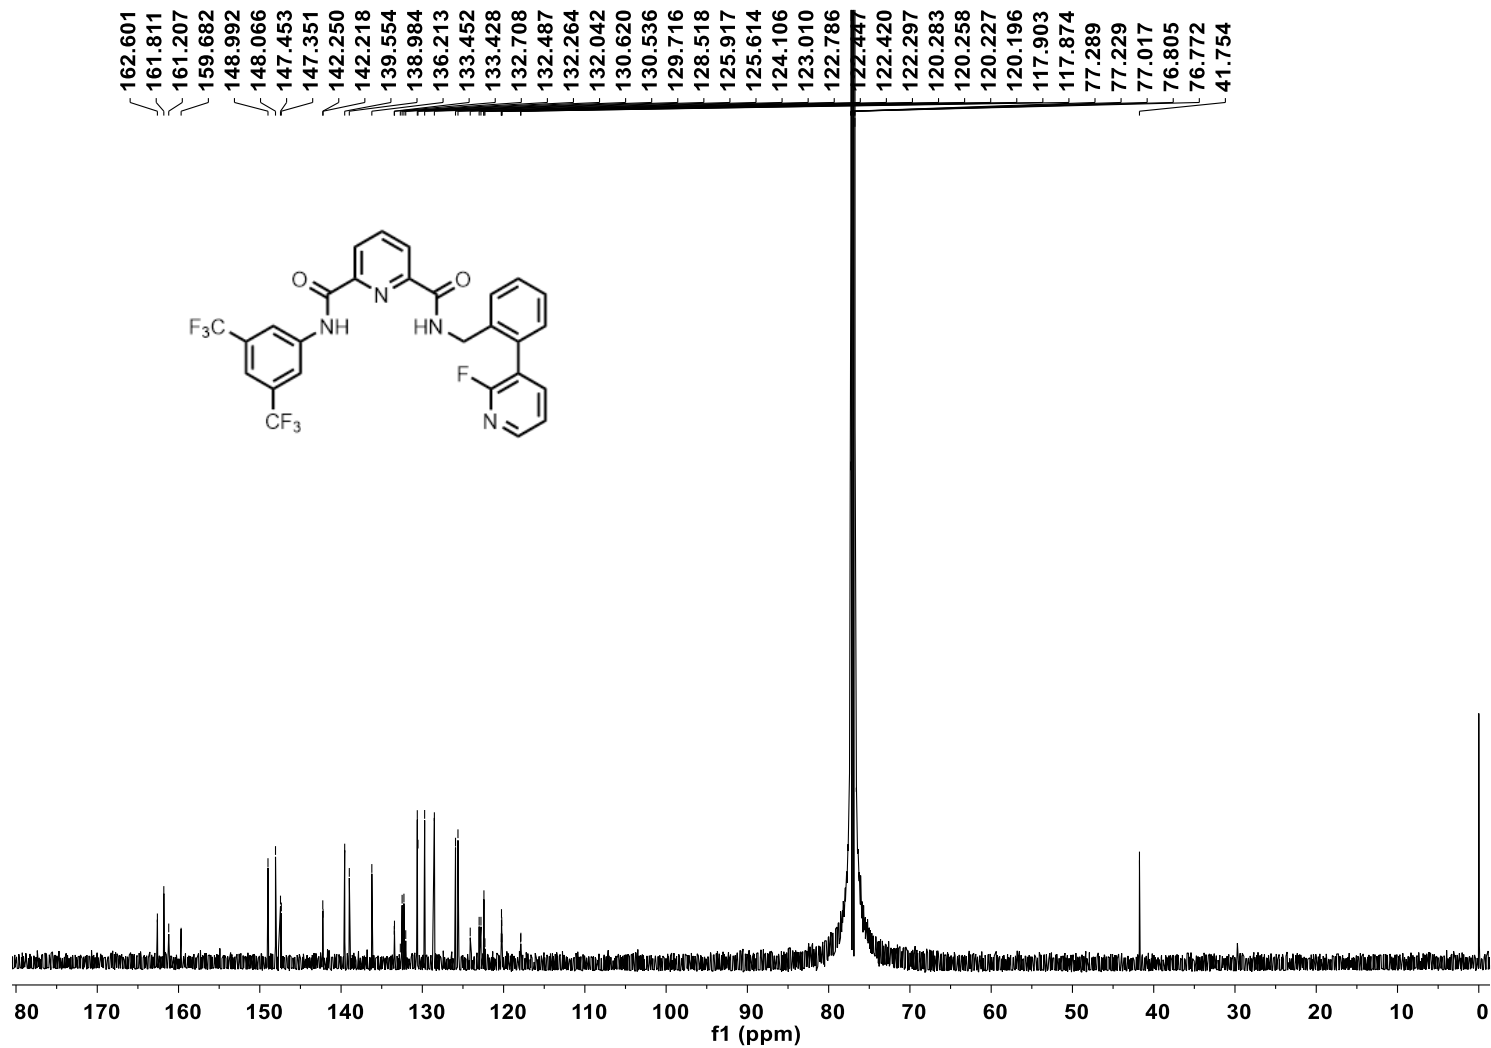

$^{19}\text{F}$  NMR (376 MHz,  $\text{CDCl}_3$ ) spectrum of **T2**

-65.516  
-71.882

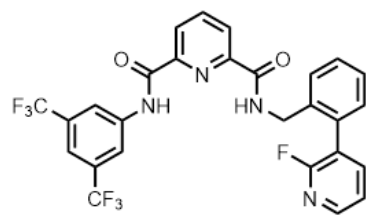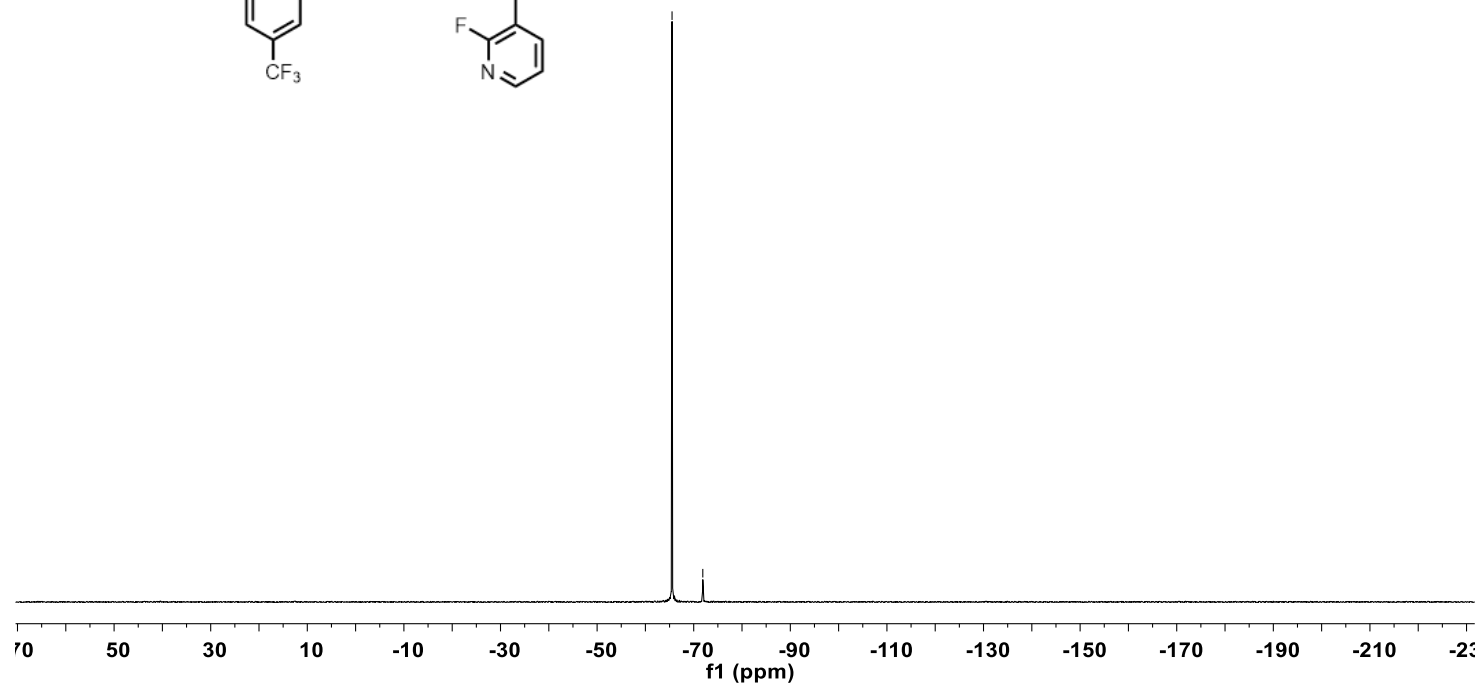

<sup>1</sup>H NMR (600 MHz, CDCl<sub>3</sub>) spectrum of **T3**

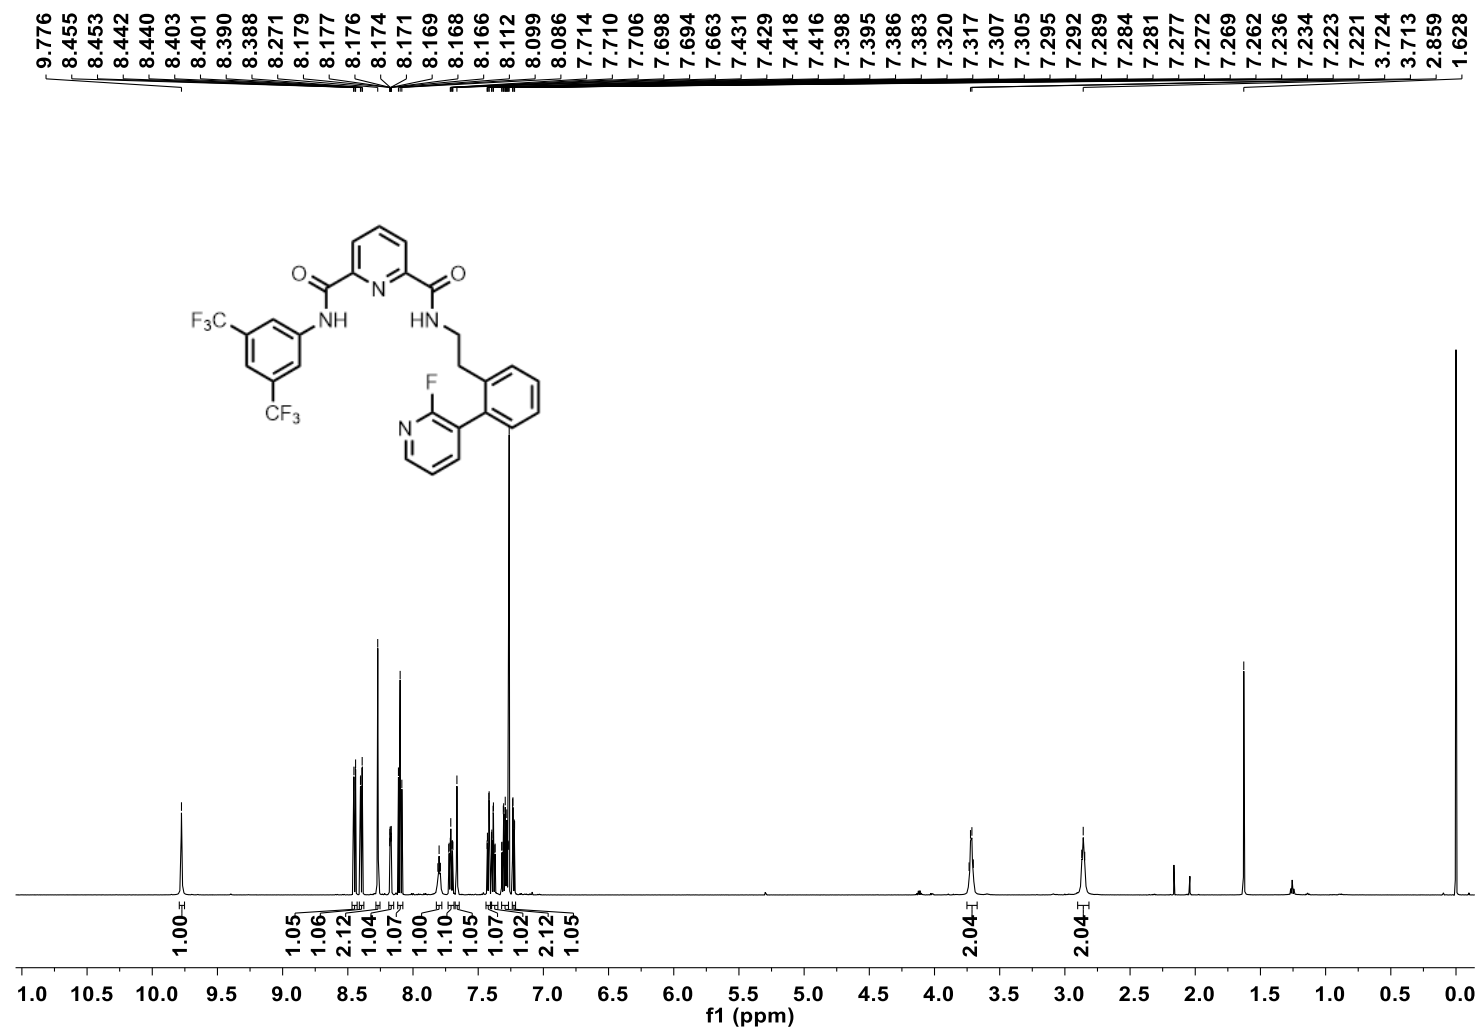

<sup>13</sup>C NMR (151 MHz, CDCl<sub>3</sub>) spectrum of T3

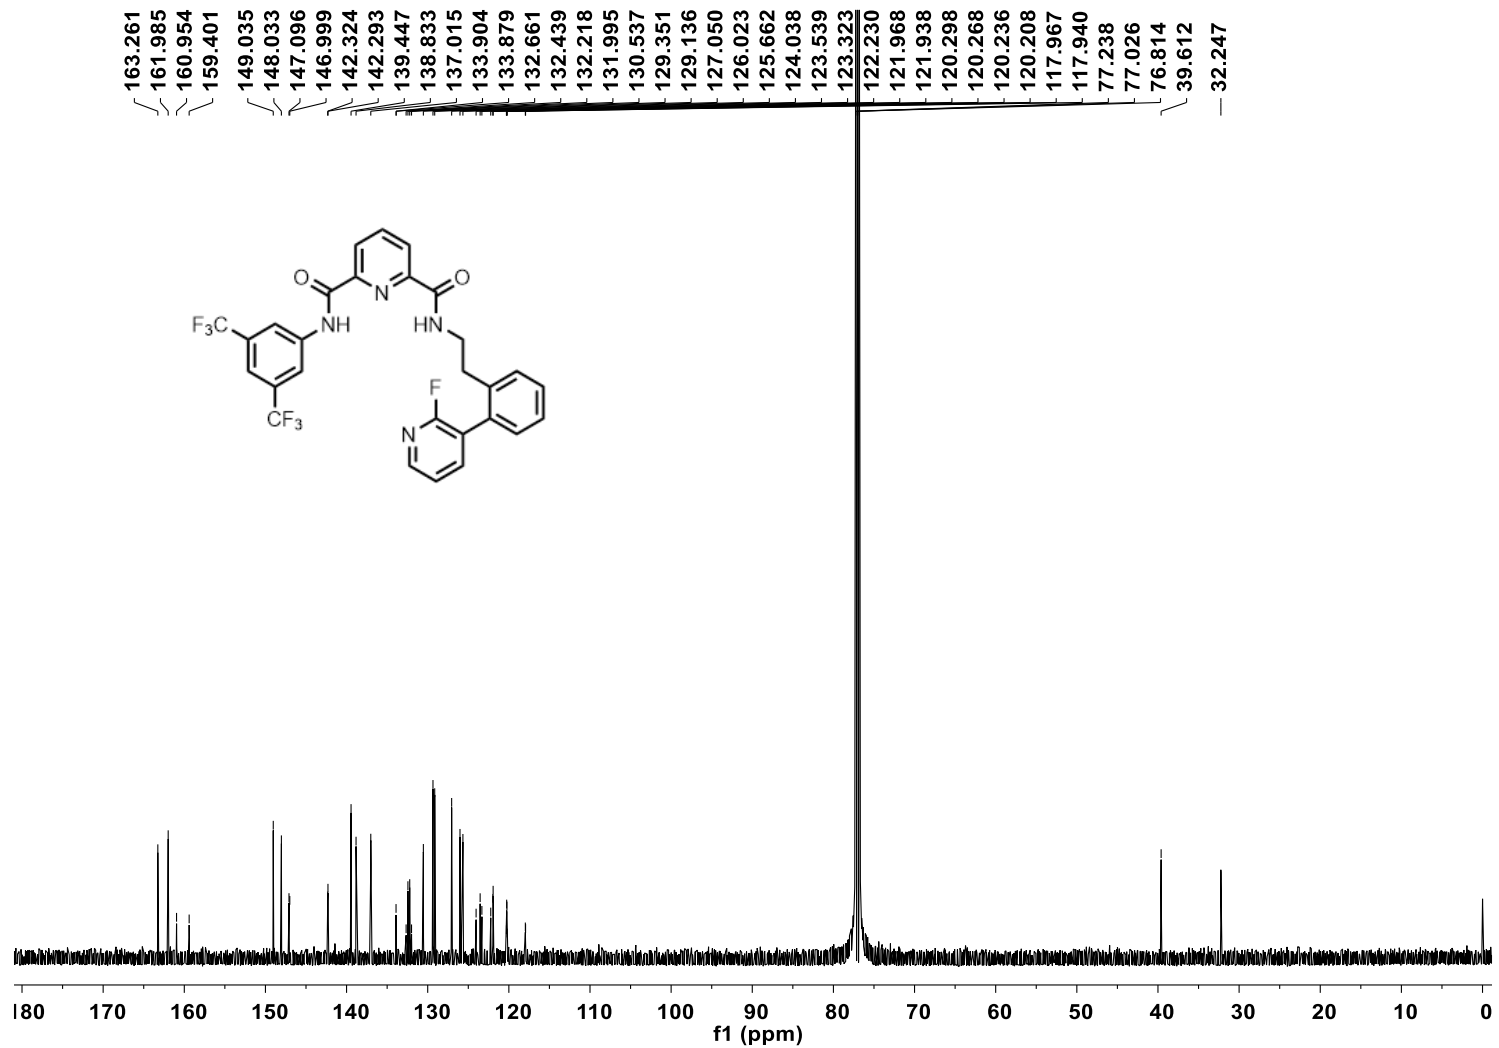

<sup>19</sup>F NMR (376 MHz, CDCl<sub>3</sub>) spectrum of **T3**

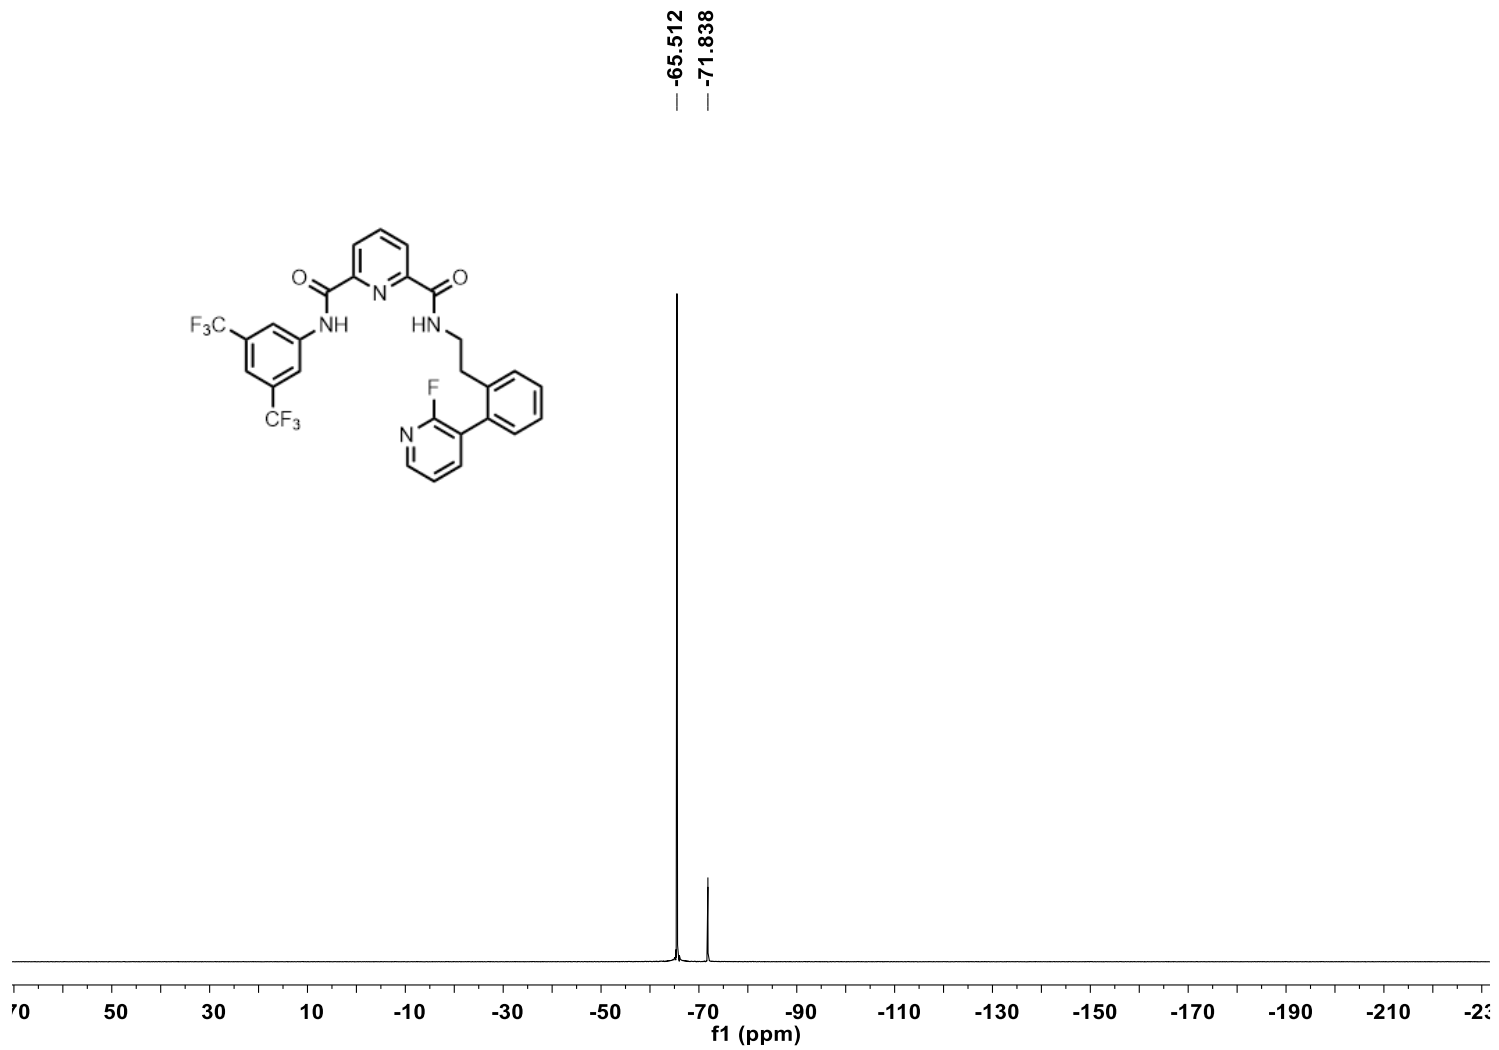

<sup>1</sup>H NMR (600 MHz, CDCl<sub>3</sub>) spectrum of **T4**

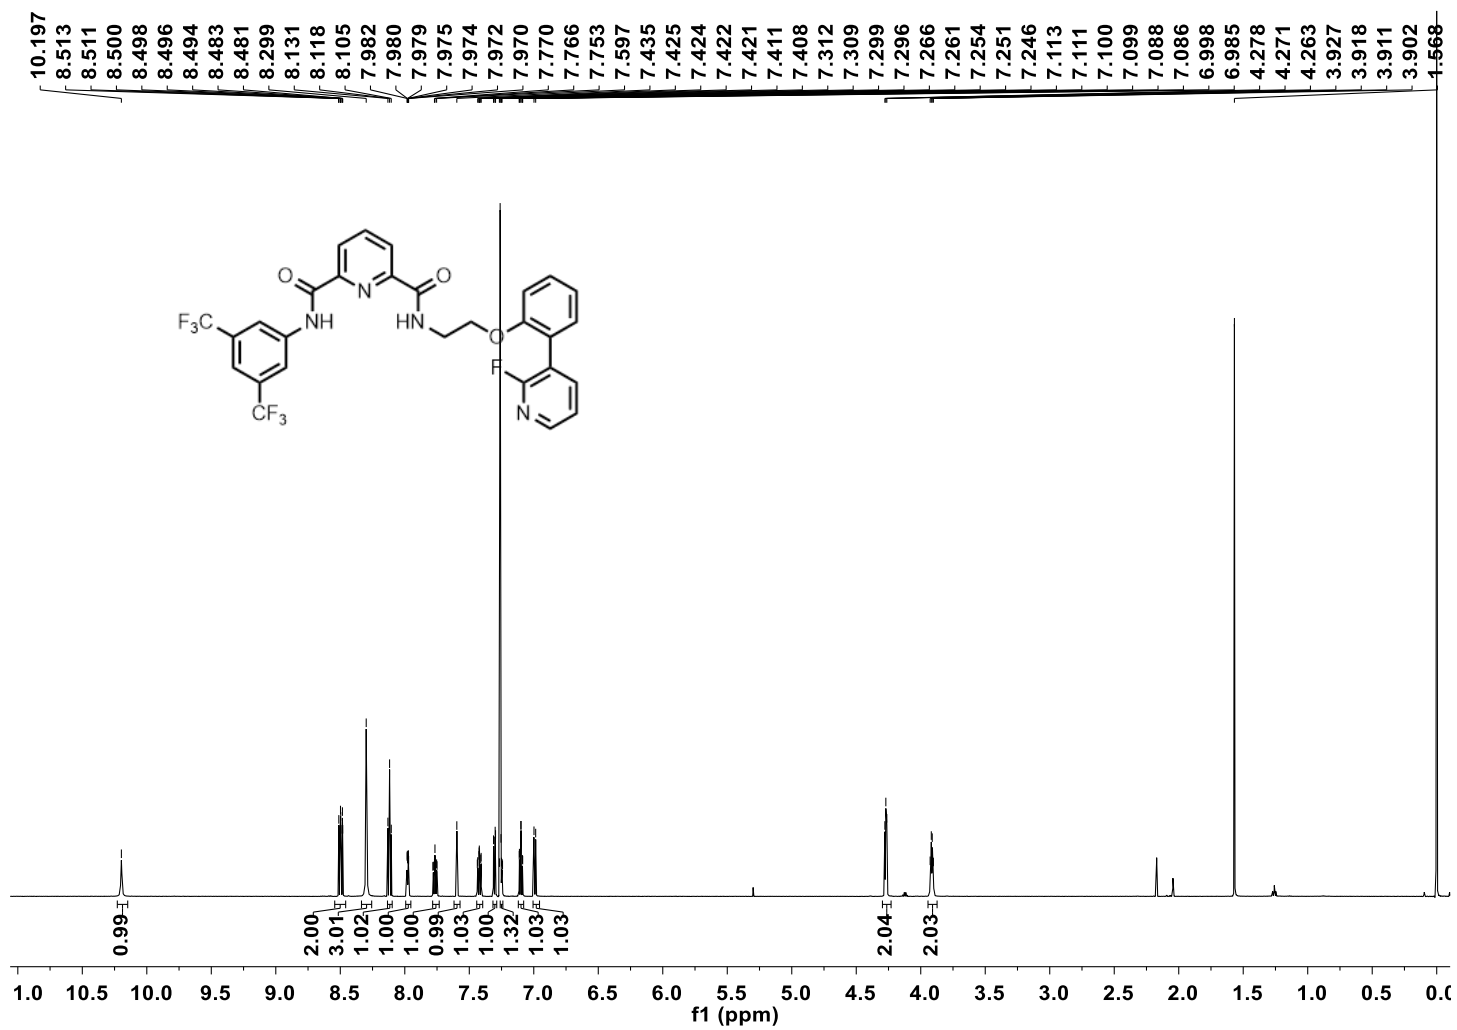



<sup>13</sup>C NMR (151 MHz, CDCl<sub>3</sub>) spectrum of T4

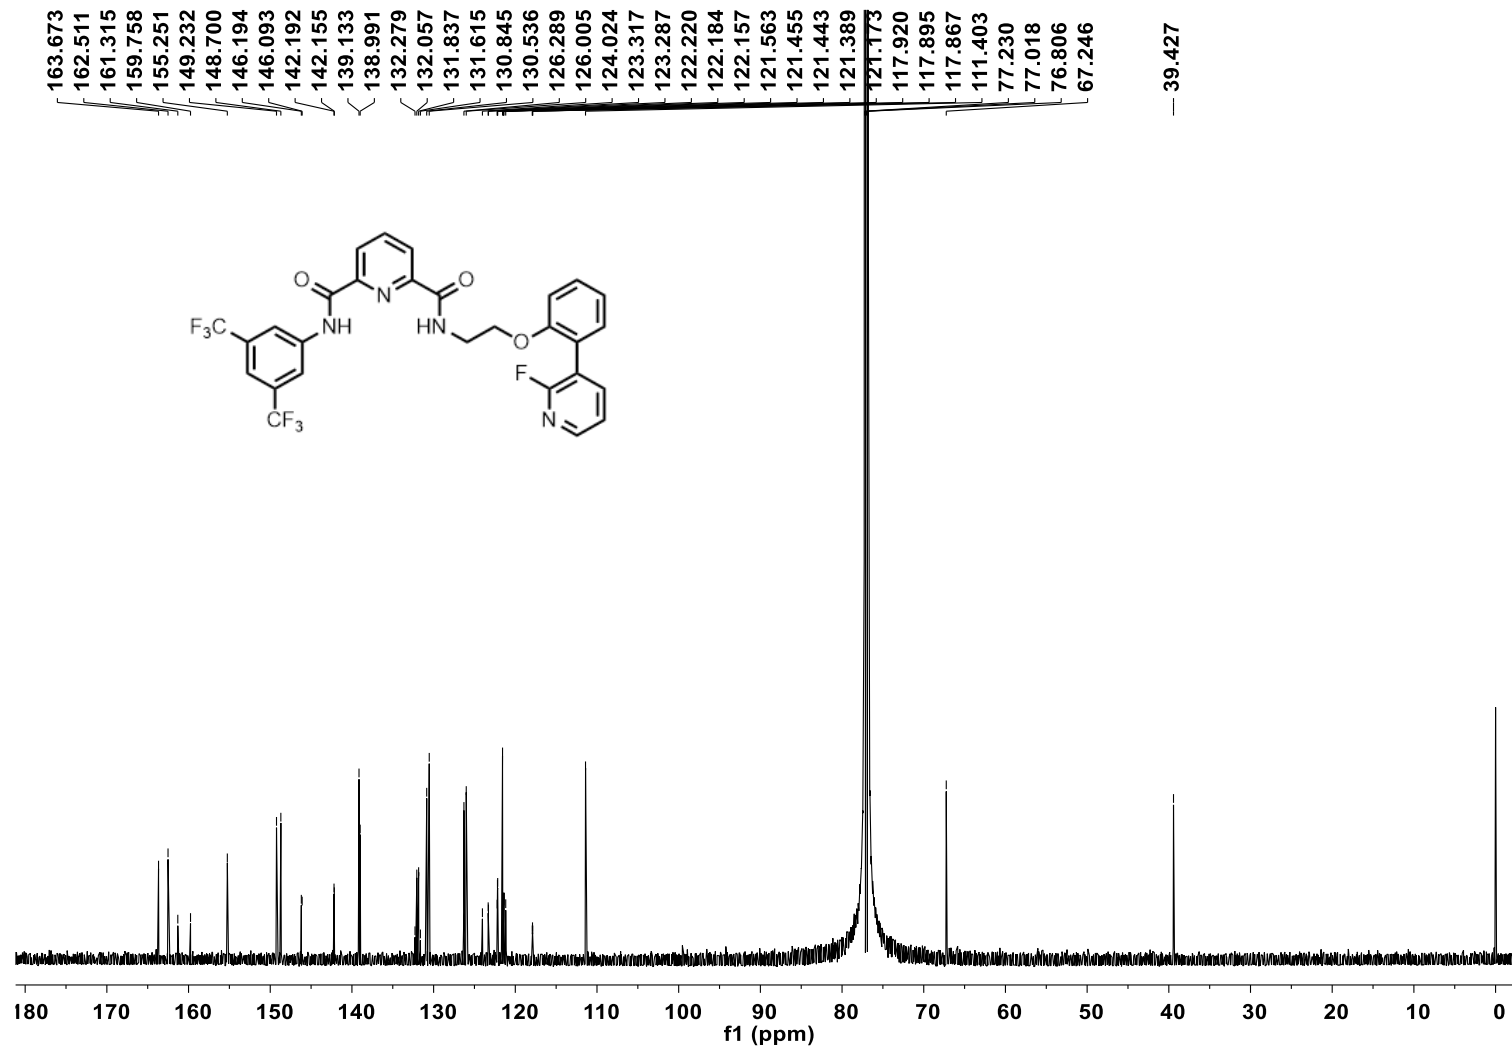

$^{19}\text{F}$  NMR (376 MHz,  $\text{CDCl}_3$ ) spectrum of **T4**

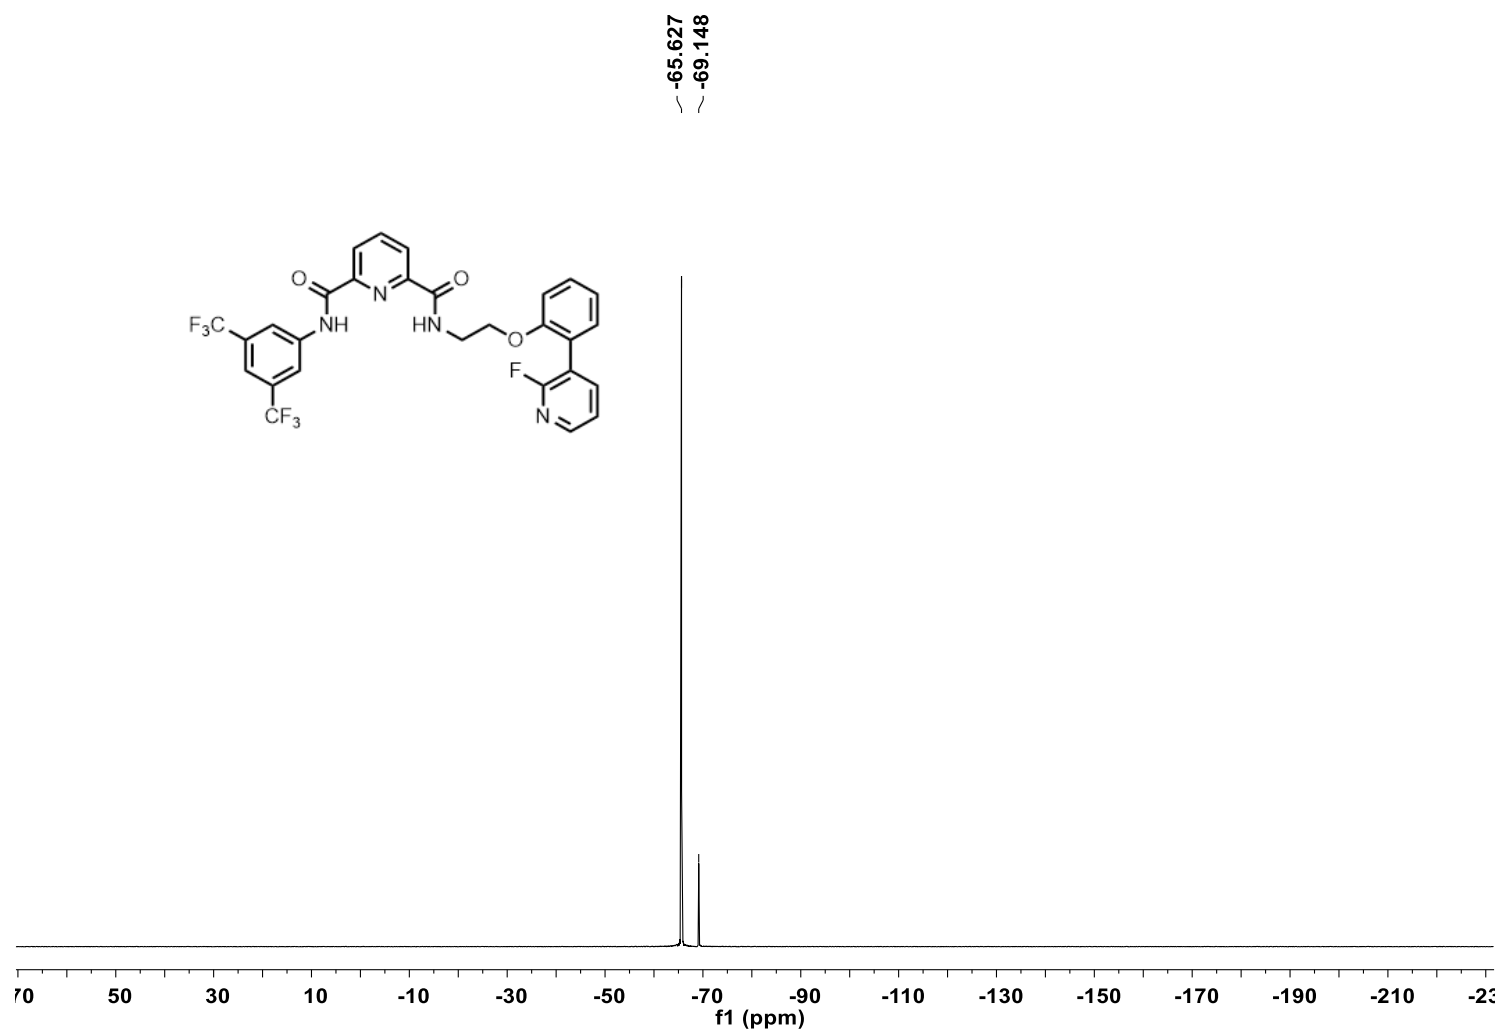

<sup>1</sup>H NMR (600 MHz, CDCl<sub>3</sub>) spectrum of T5

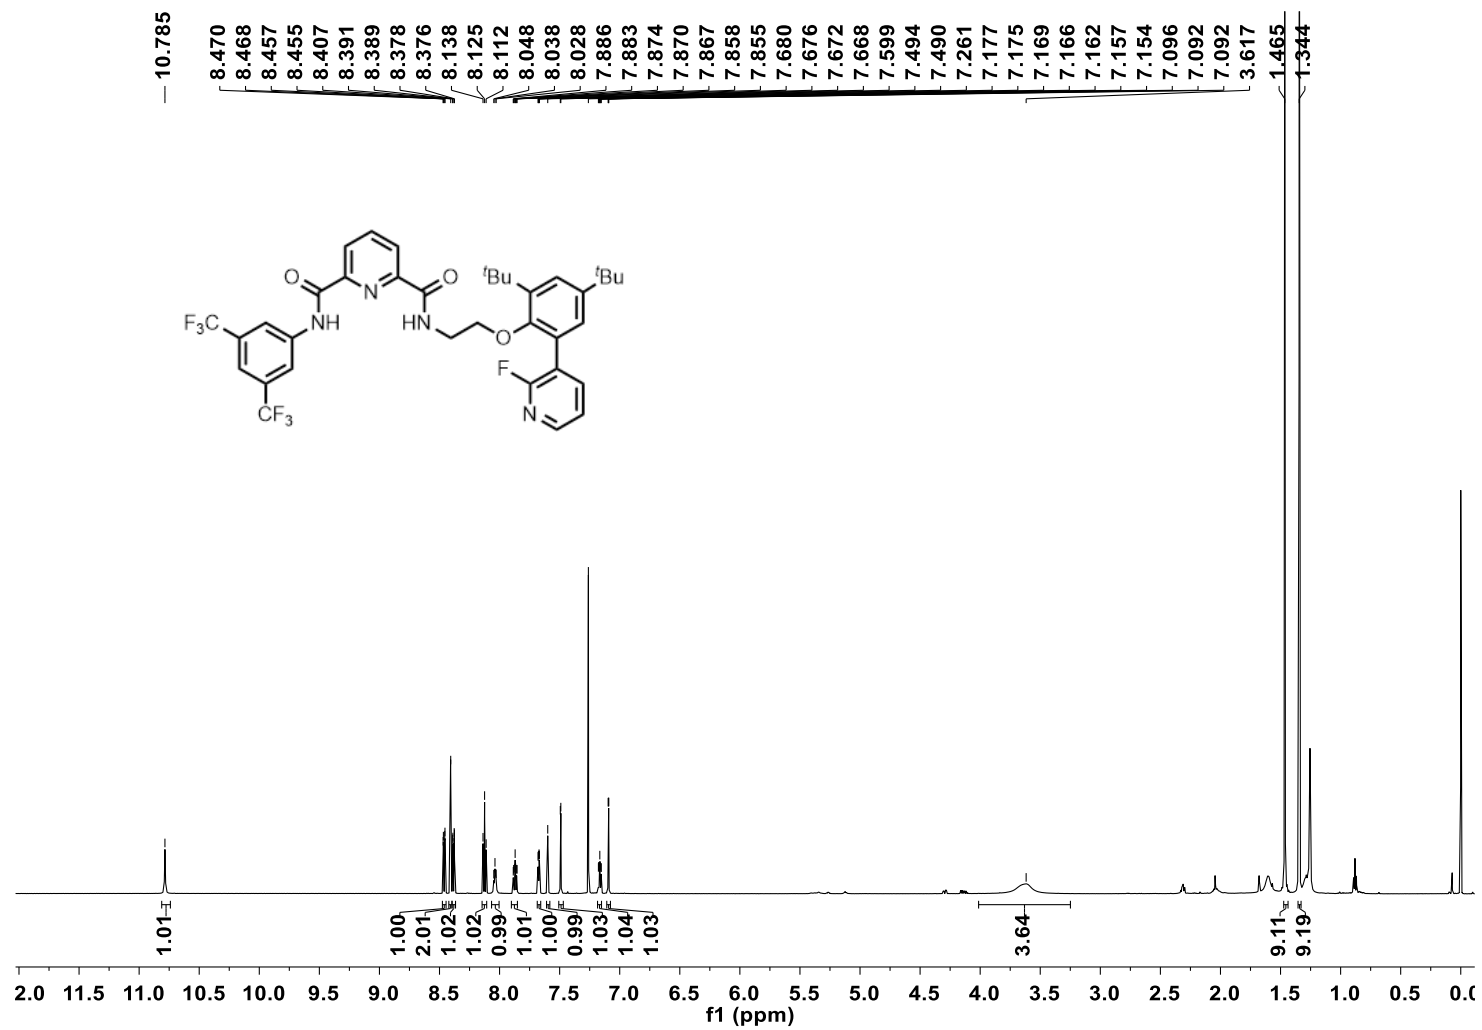

<sup>13</sup>C NMR (151 MHz, CDCl<sub>3</sub>) spectrum of **T5**

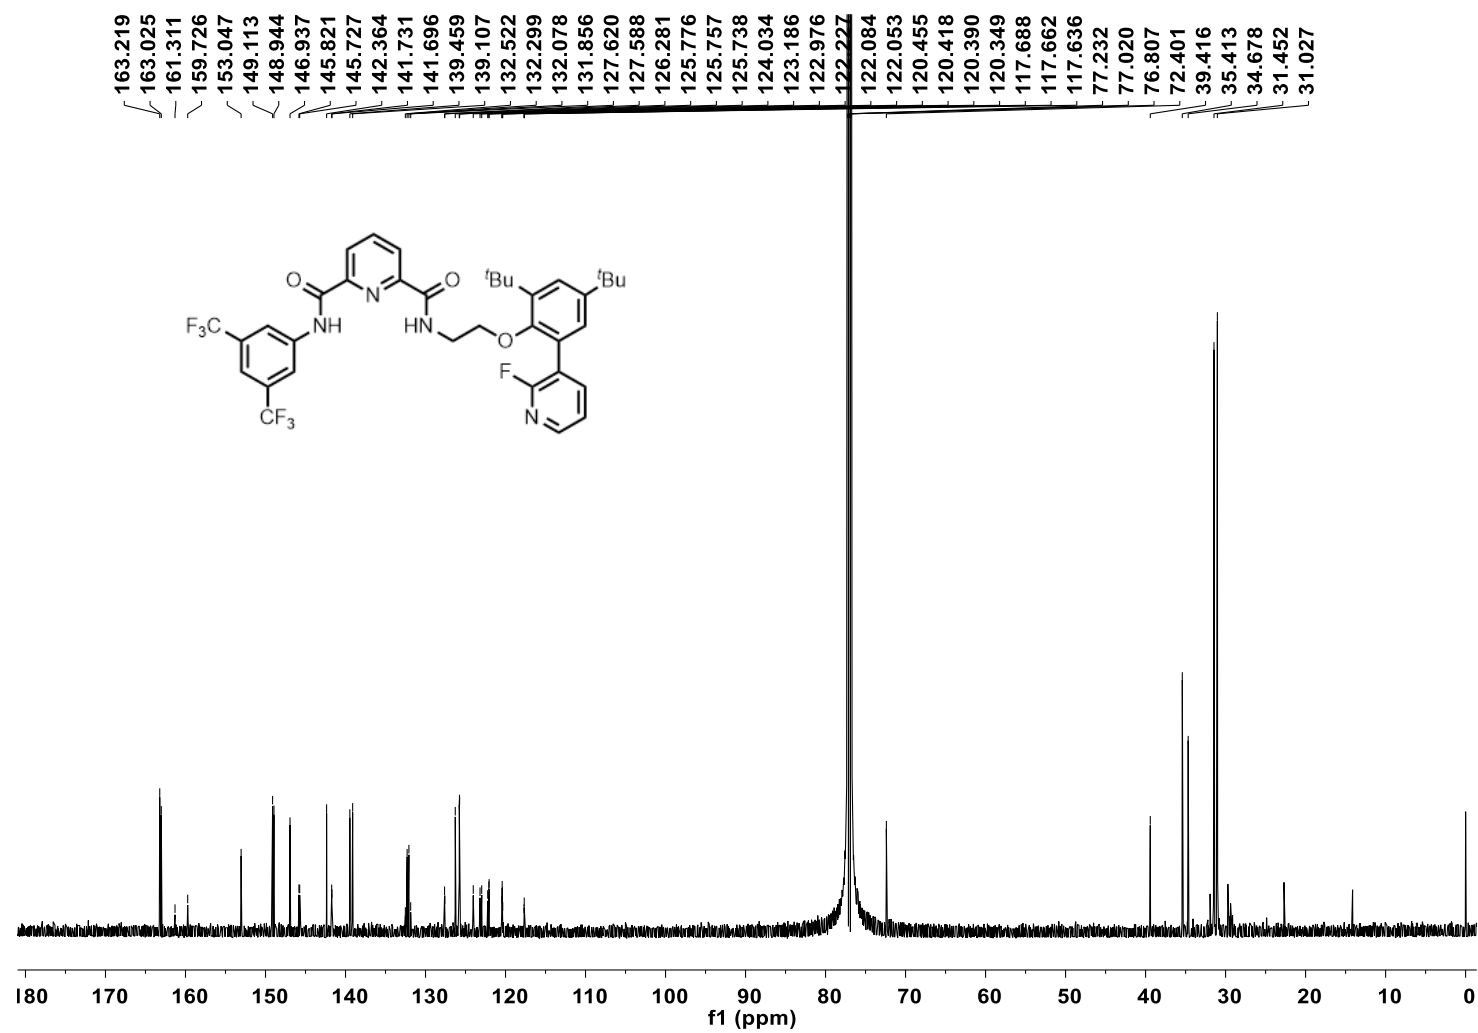

$^{19}\text{F}$  NMR (376 MHz,  $\text{CDCl}_3$ ) spectrum of **T5**

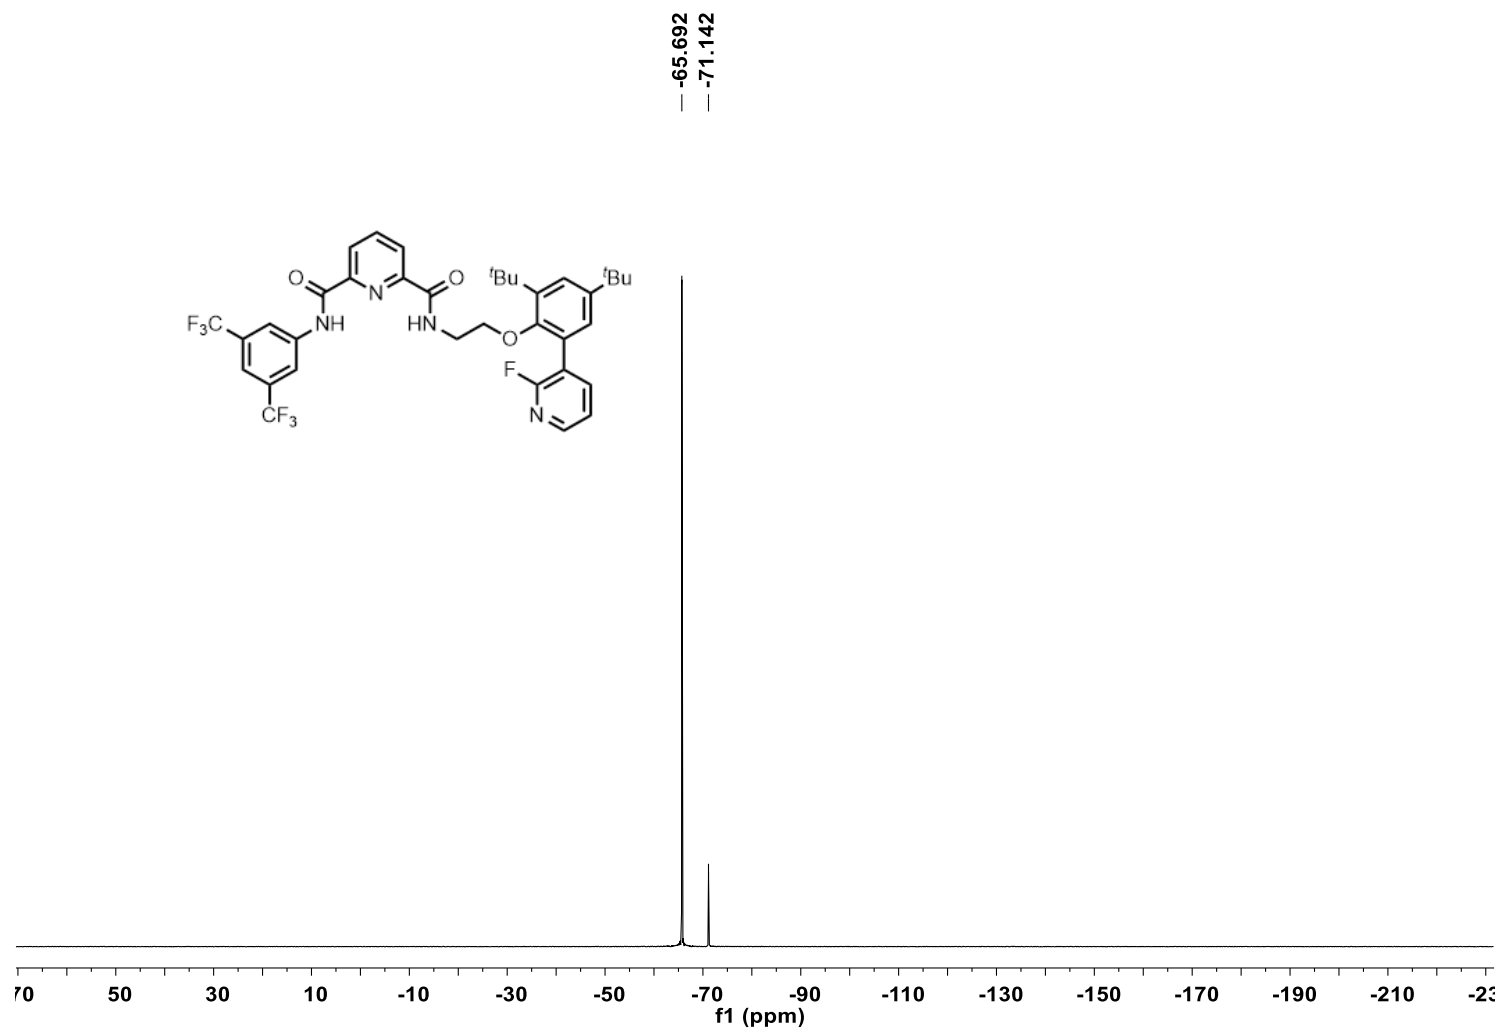

<sup>1</sup>H NMR (600 MHz, CDCl<sub>3</sub>) spectrum of T6

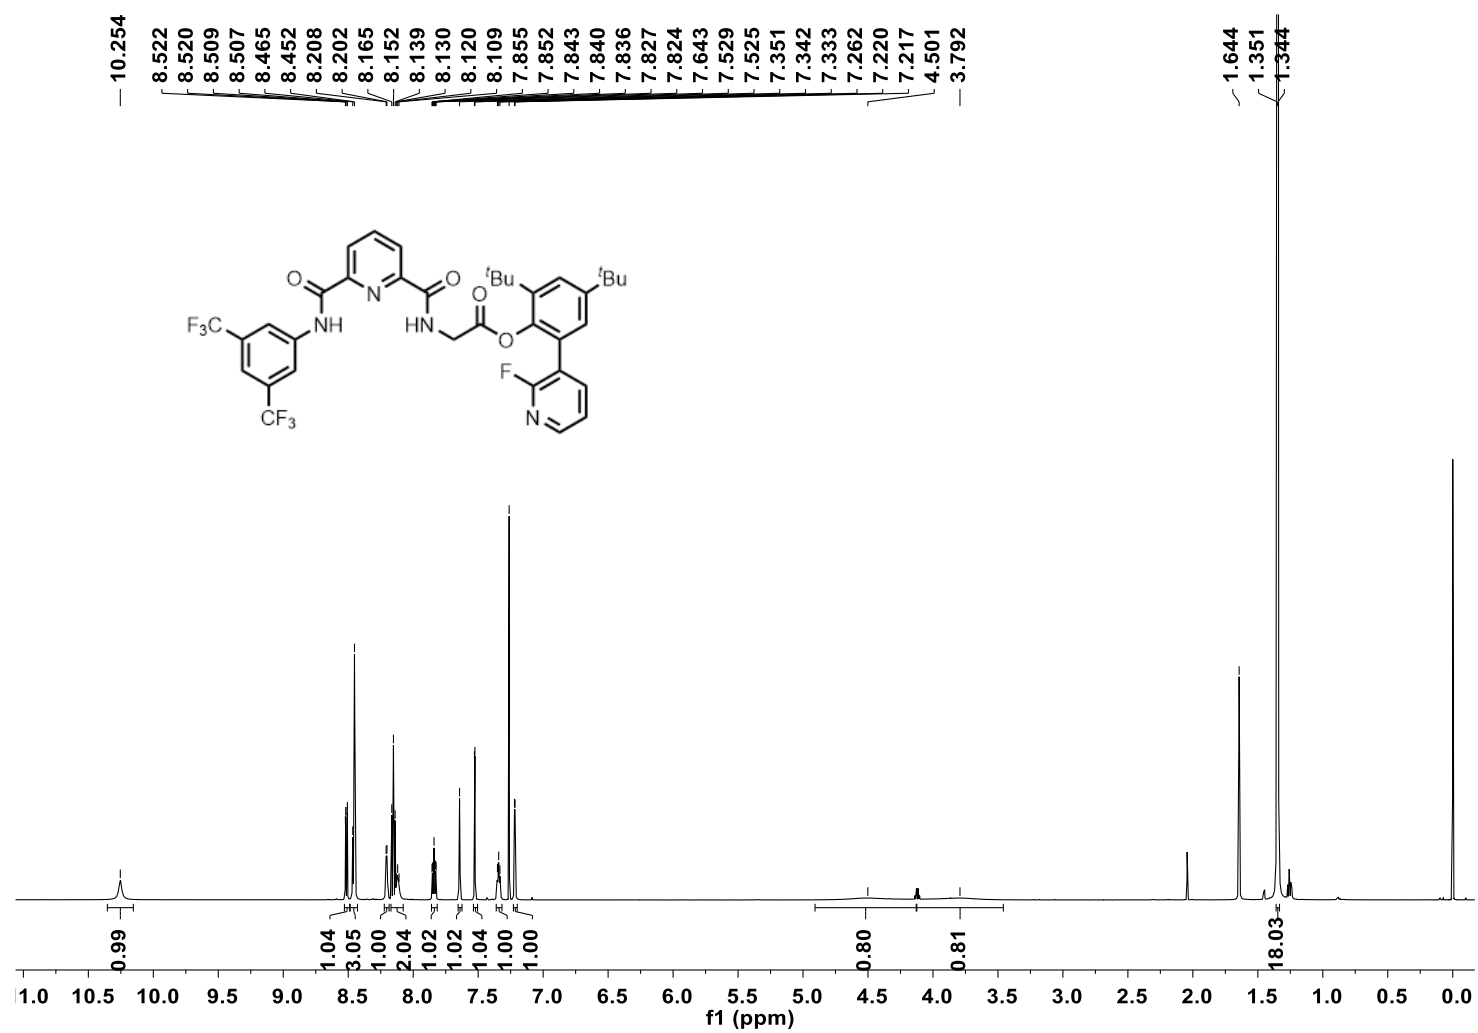

<sup>13</sup>C NMR (151 MHz, CDCl<sub>3</sub>) spectrum of T6

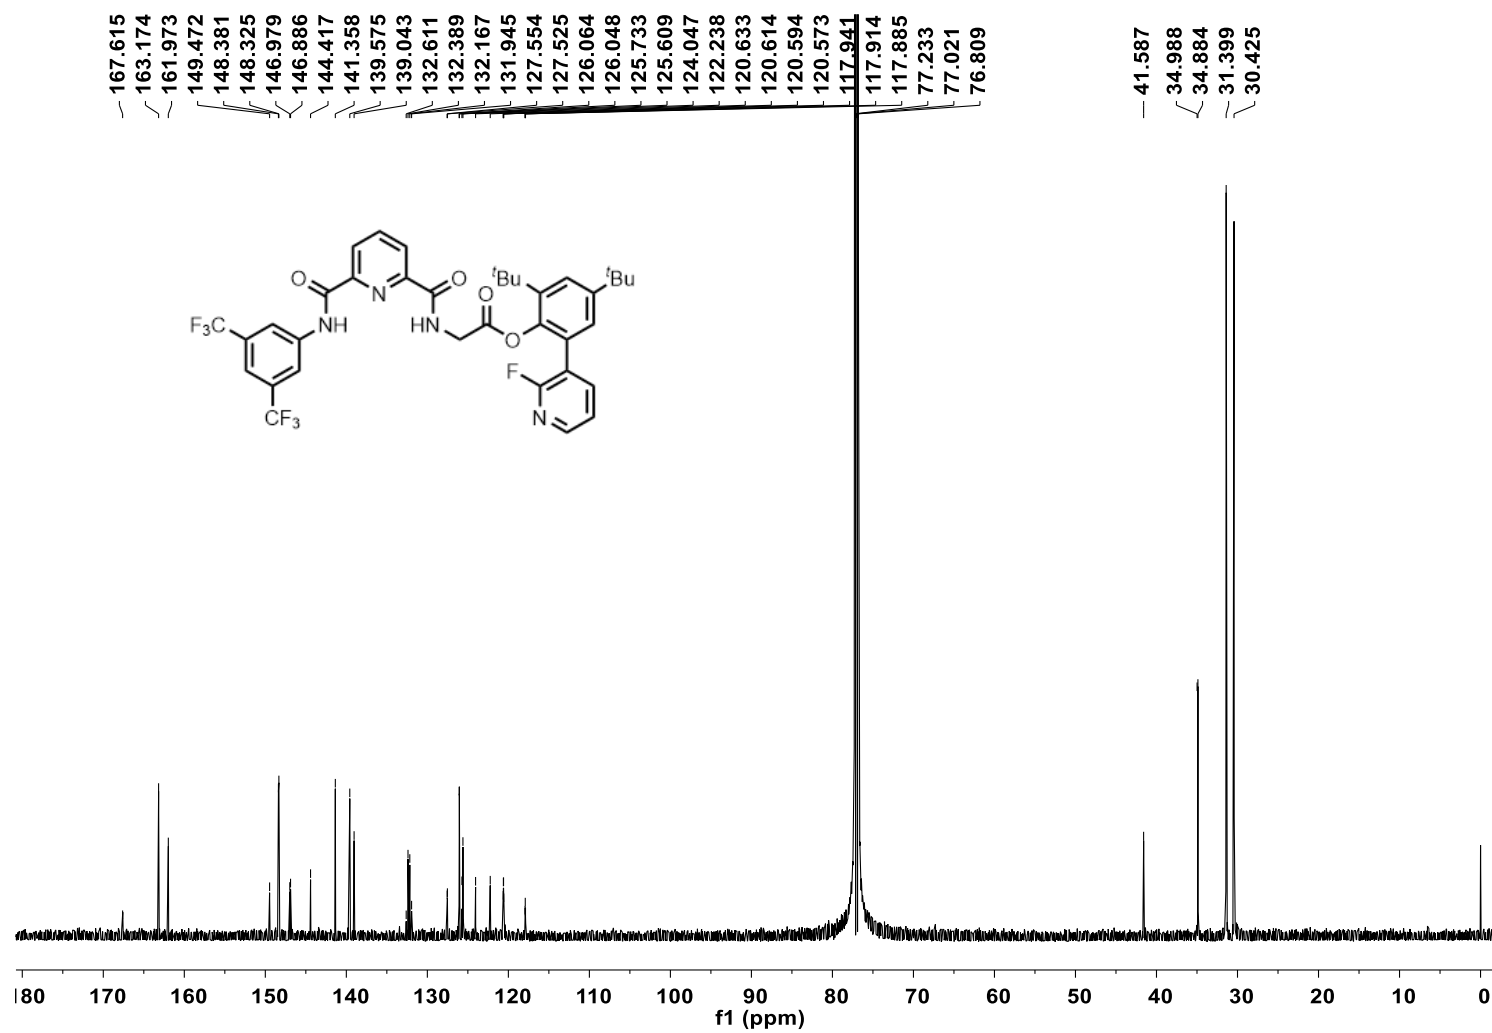

$^{19}\text{F}$  NMR (376 MHz,  $\text{CDCl}_3$ ) spectrum of **T6**

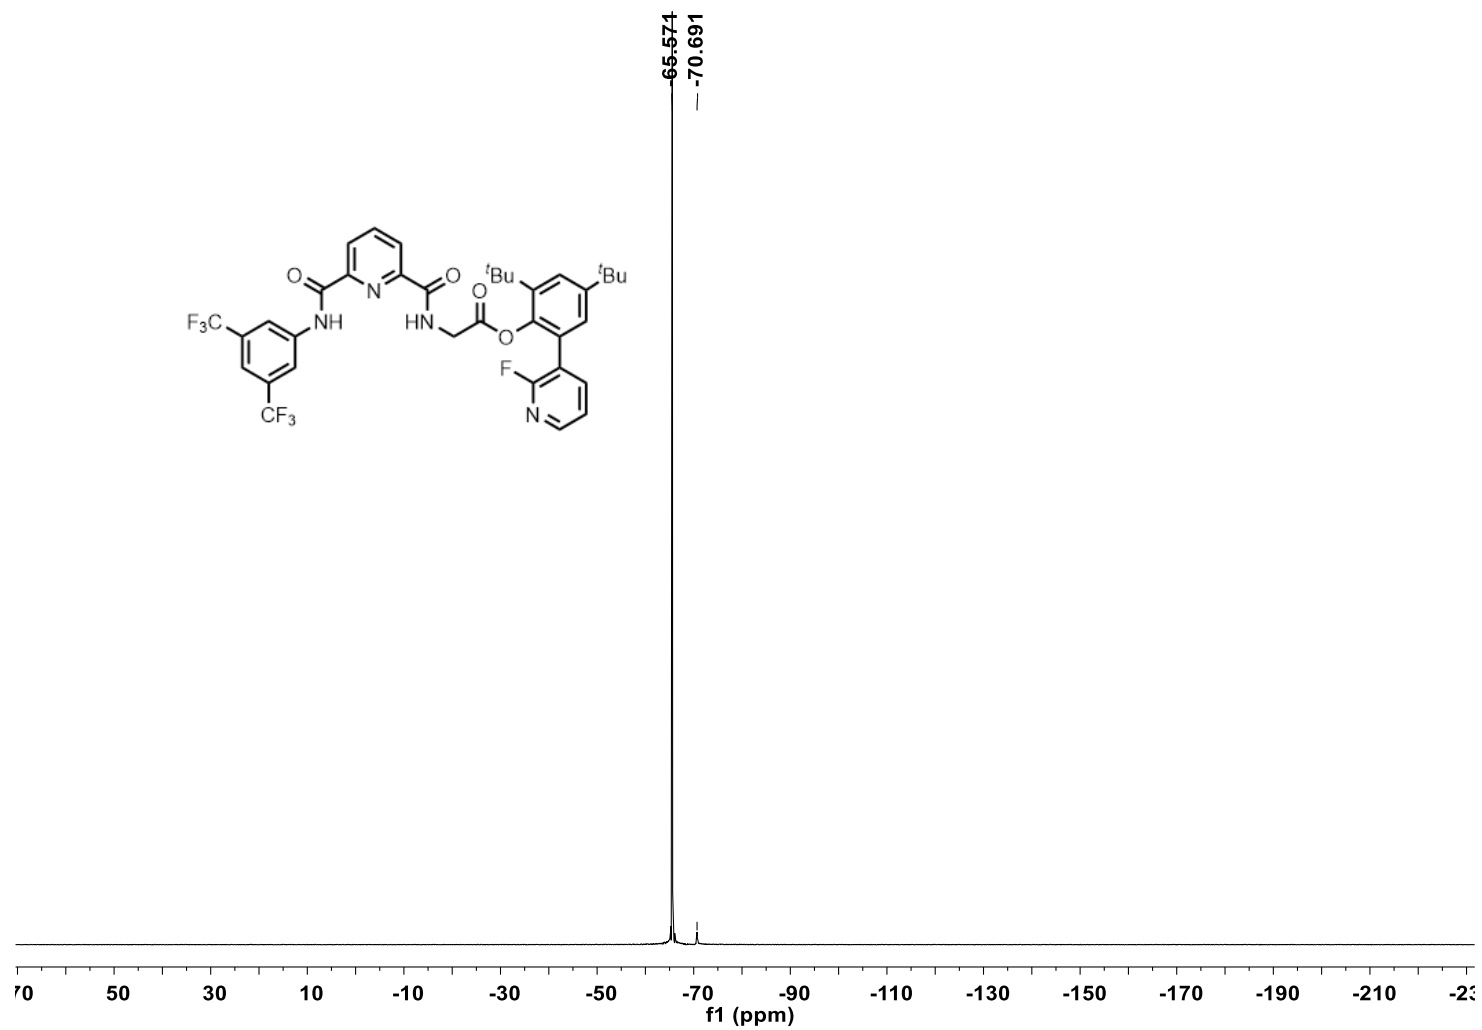



<sup>1</sup>H NMR (600 MHz, CDCl<sub>3</sub>) spectrum of T7

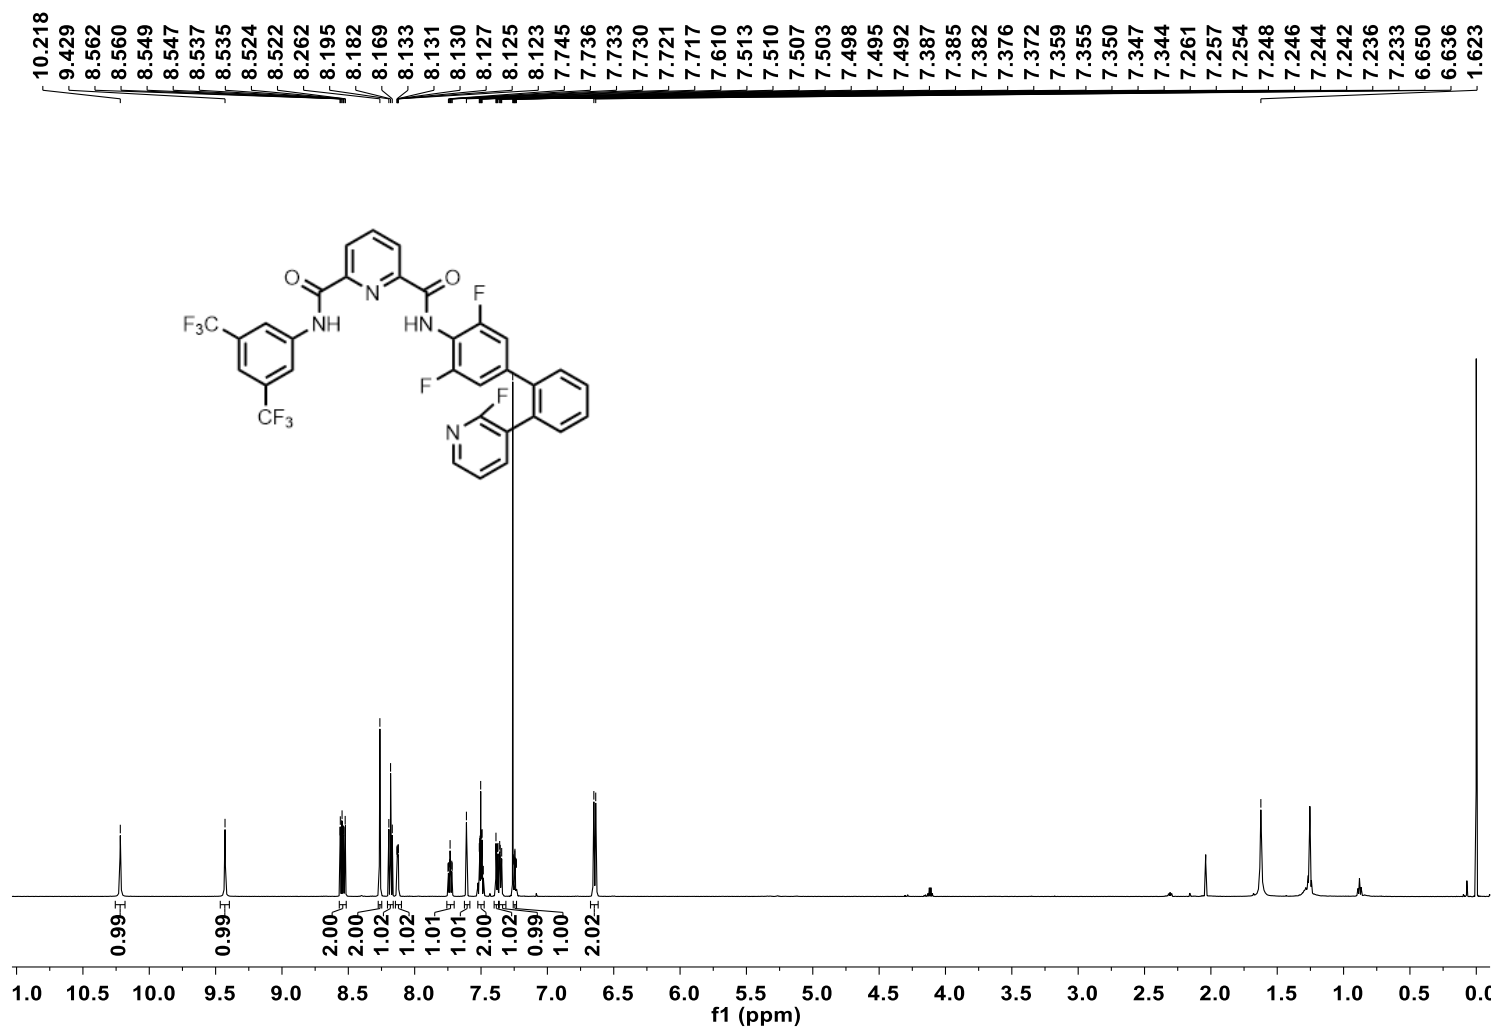

<sup>13</sup>C NMR (151 MHz, CDCl<sub>3</sub>) spectrum of T7

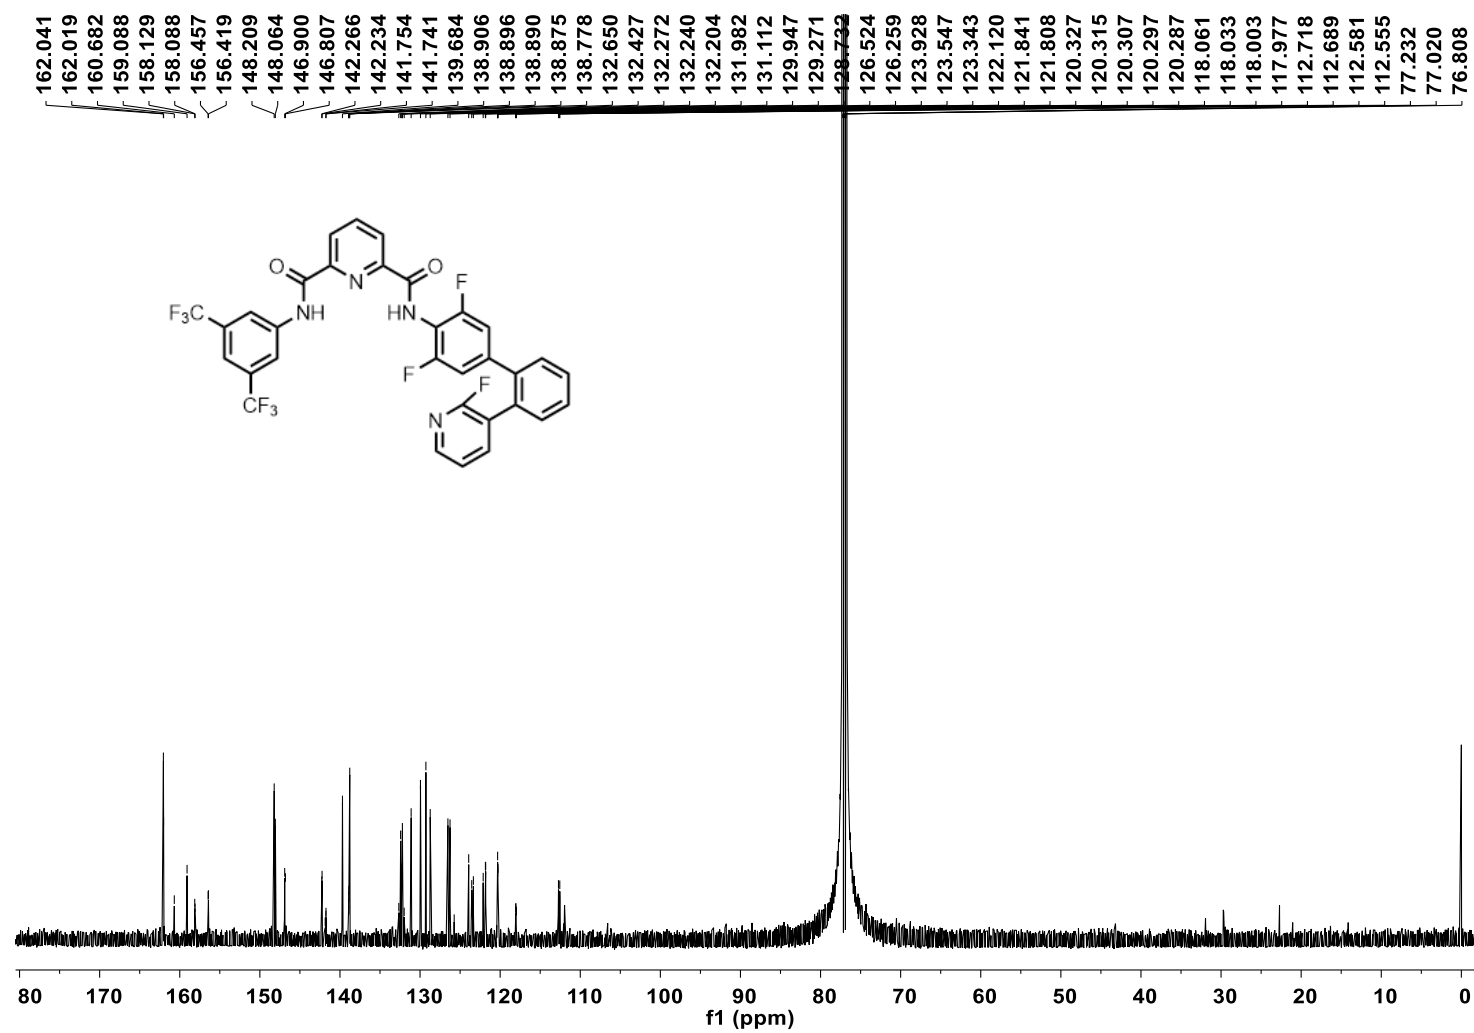

<sup>19</sup>F NMR (376 MHz, CDCl<sub>3</sub>) spectrum of T7

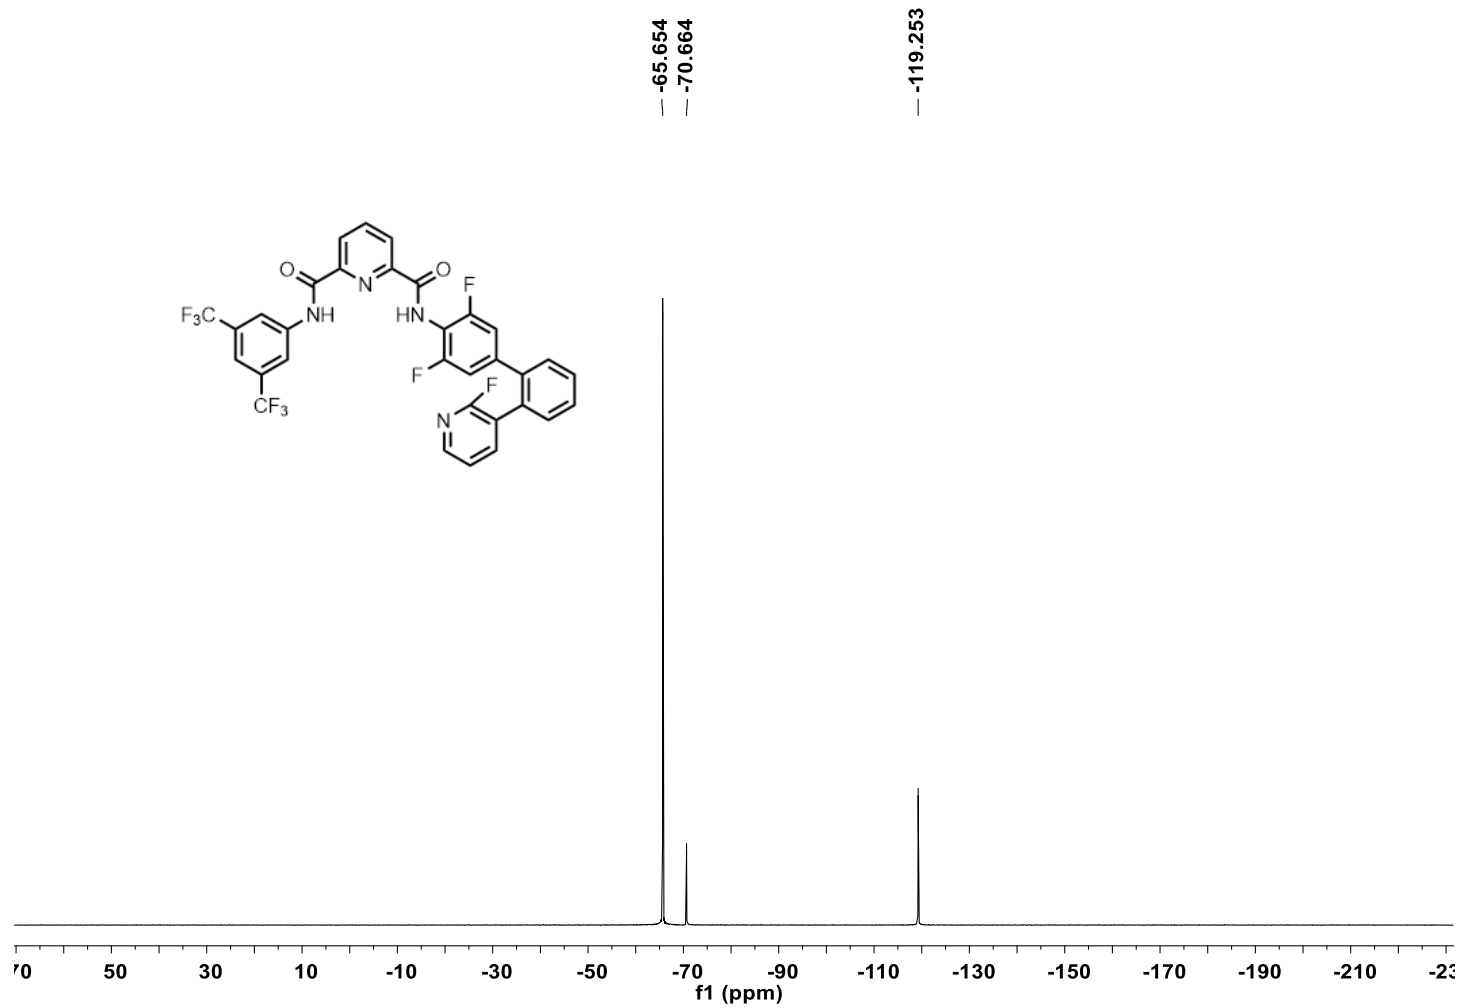

<sup>1</sup>H NMR (600 MHz, CDCl<sub>3</sub>) spectrum of T8

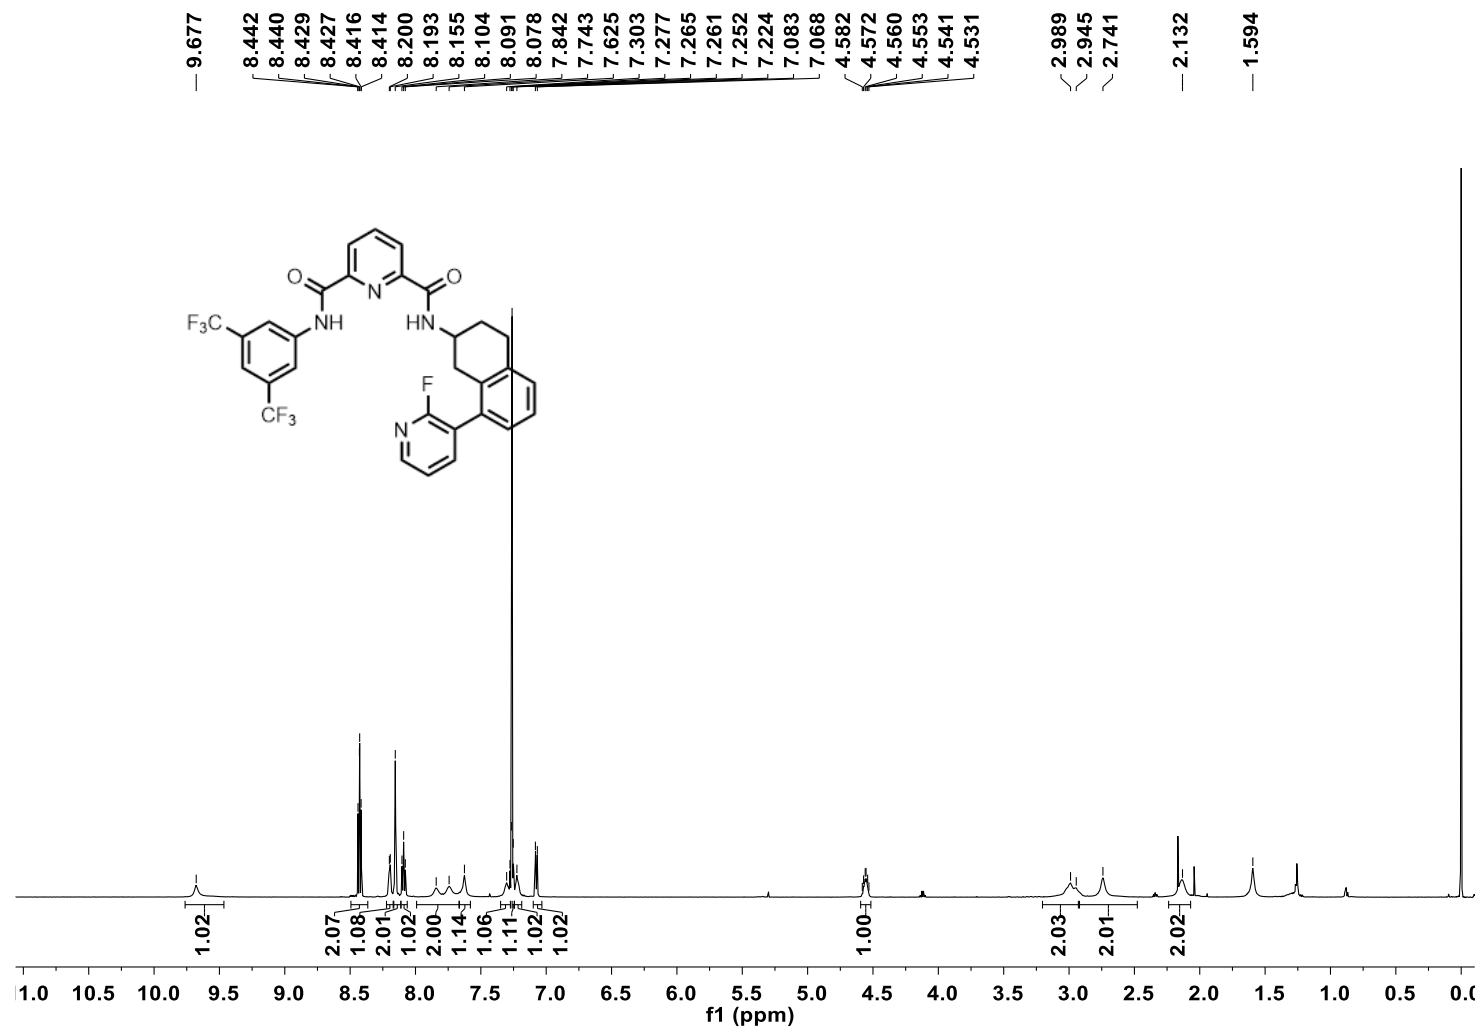

<sup>13</sup>C NMR (151 MHz, CDCl<sub>3</sub>) spectrum of T8

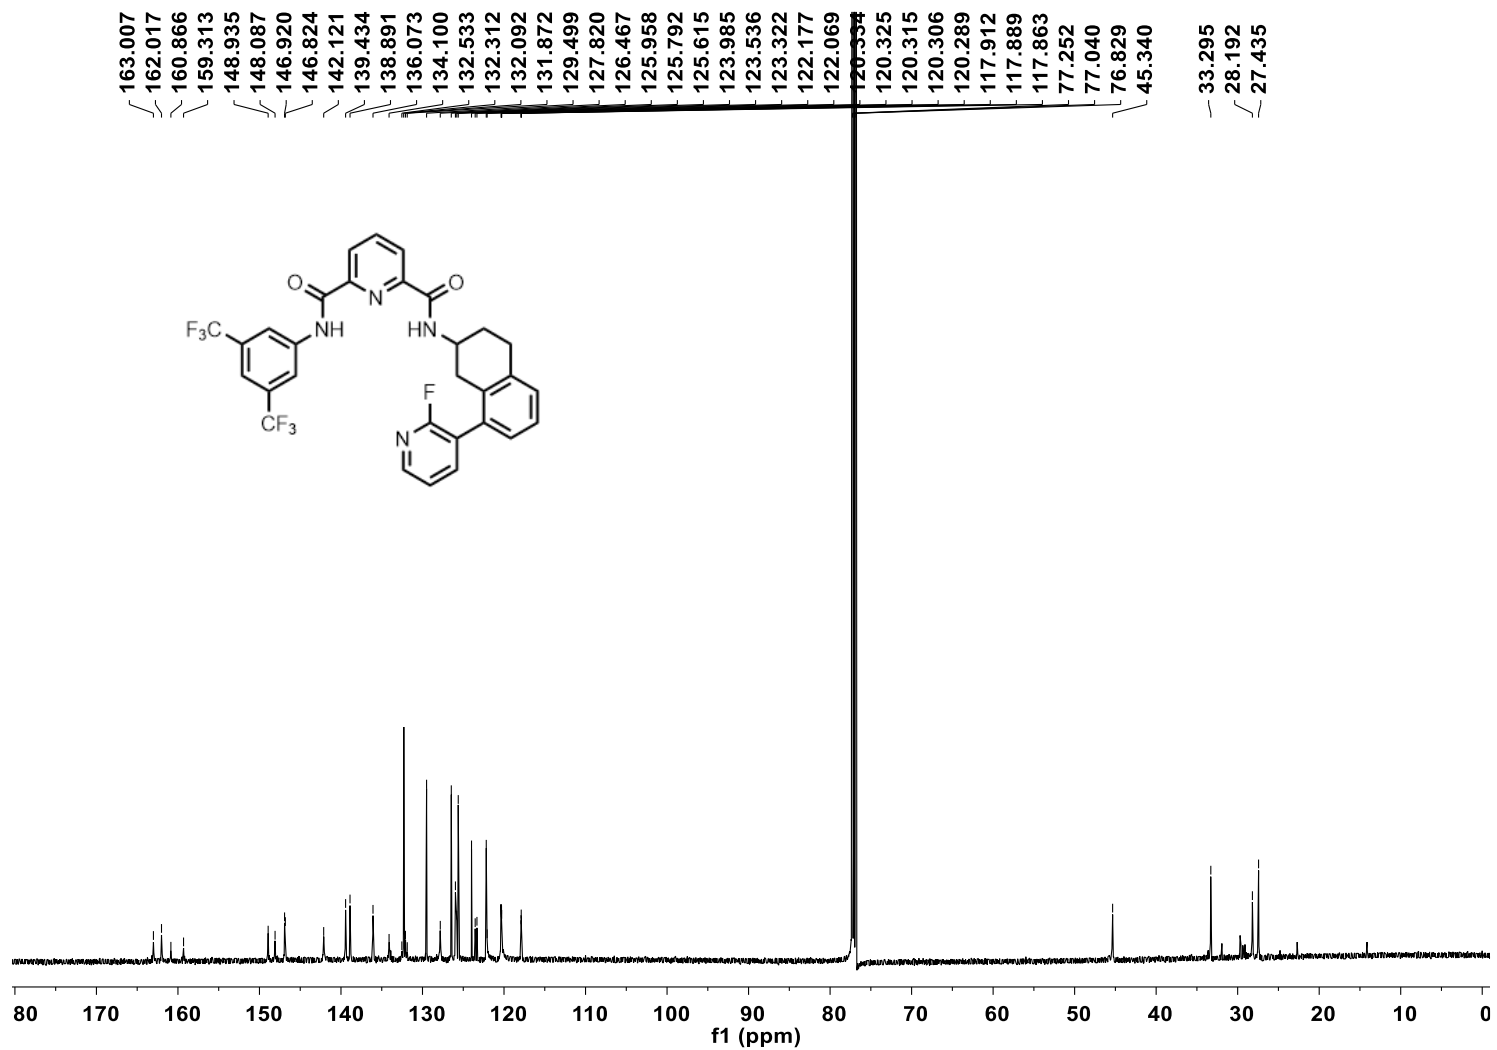

$^{19}\text{F}$  NMR (376 MHz,  $\text{CDCl}_3$ ) spectrum of **T8**

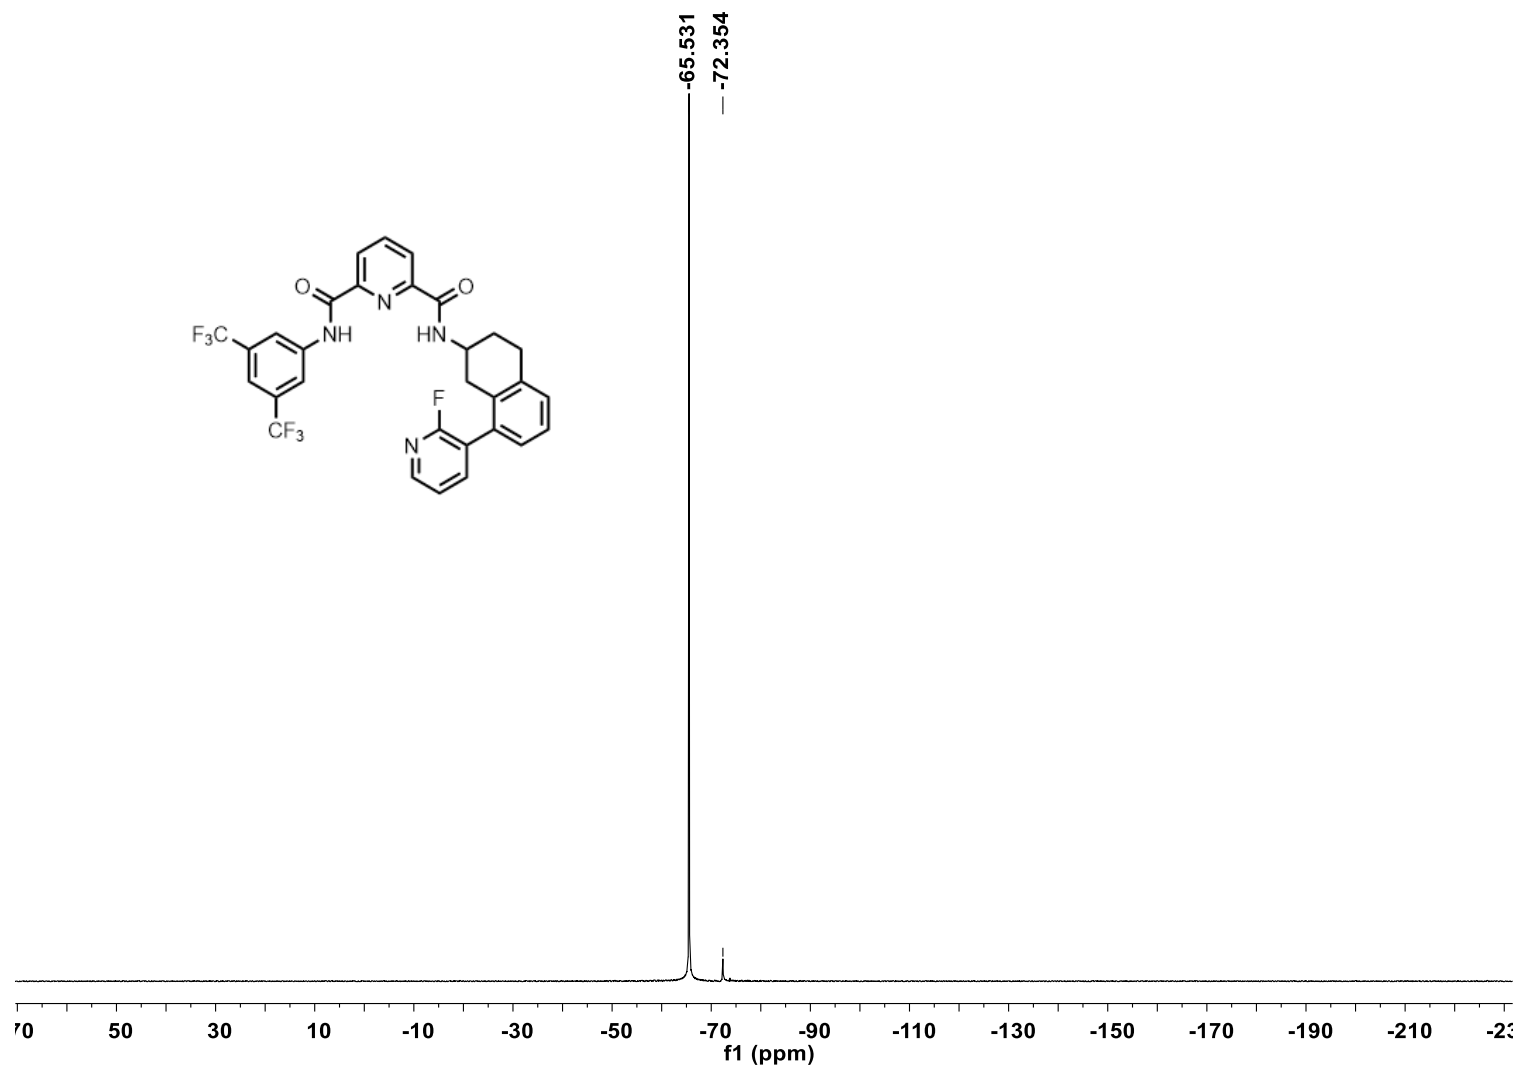

<sup>1</sup>H NMR (600 MHz, CDCl<sub>3</sub>) spectrum of T9

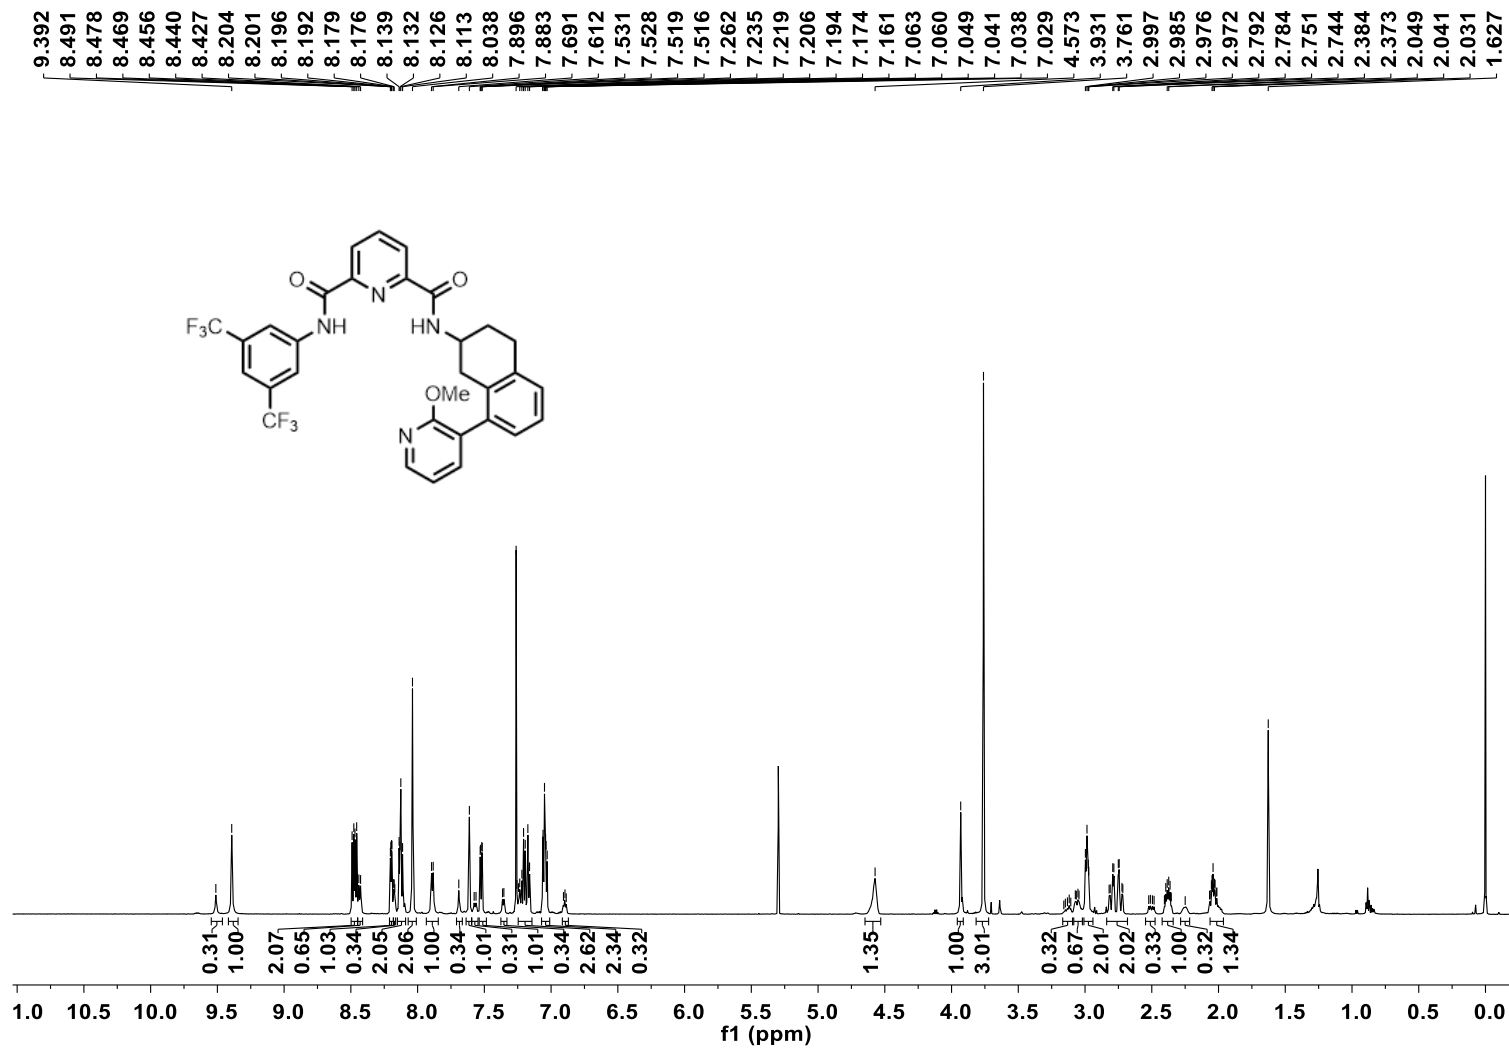

<sup>13</sup>C NMR (151 MHz, CDCl<sub>3</sub>) spectrum of **T9**

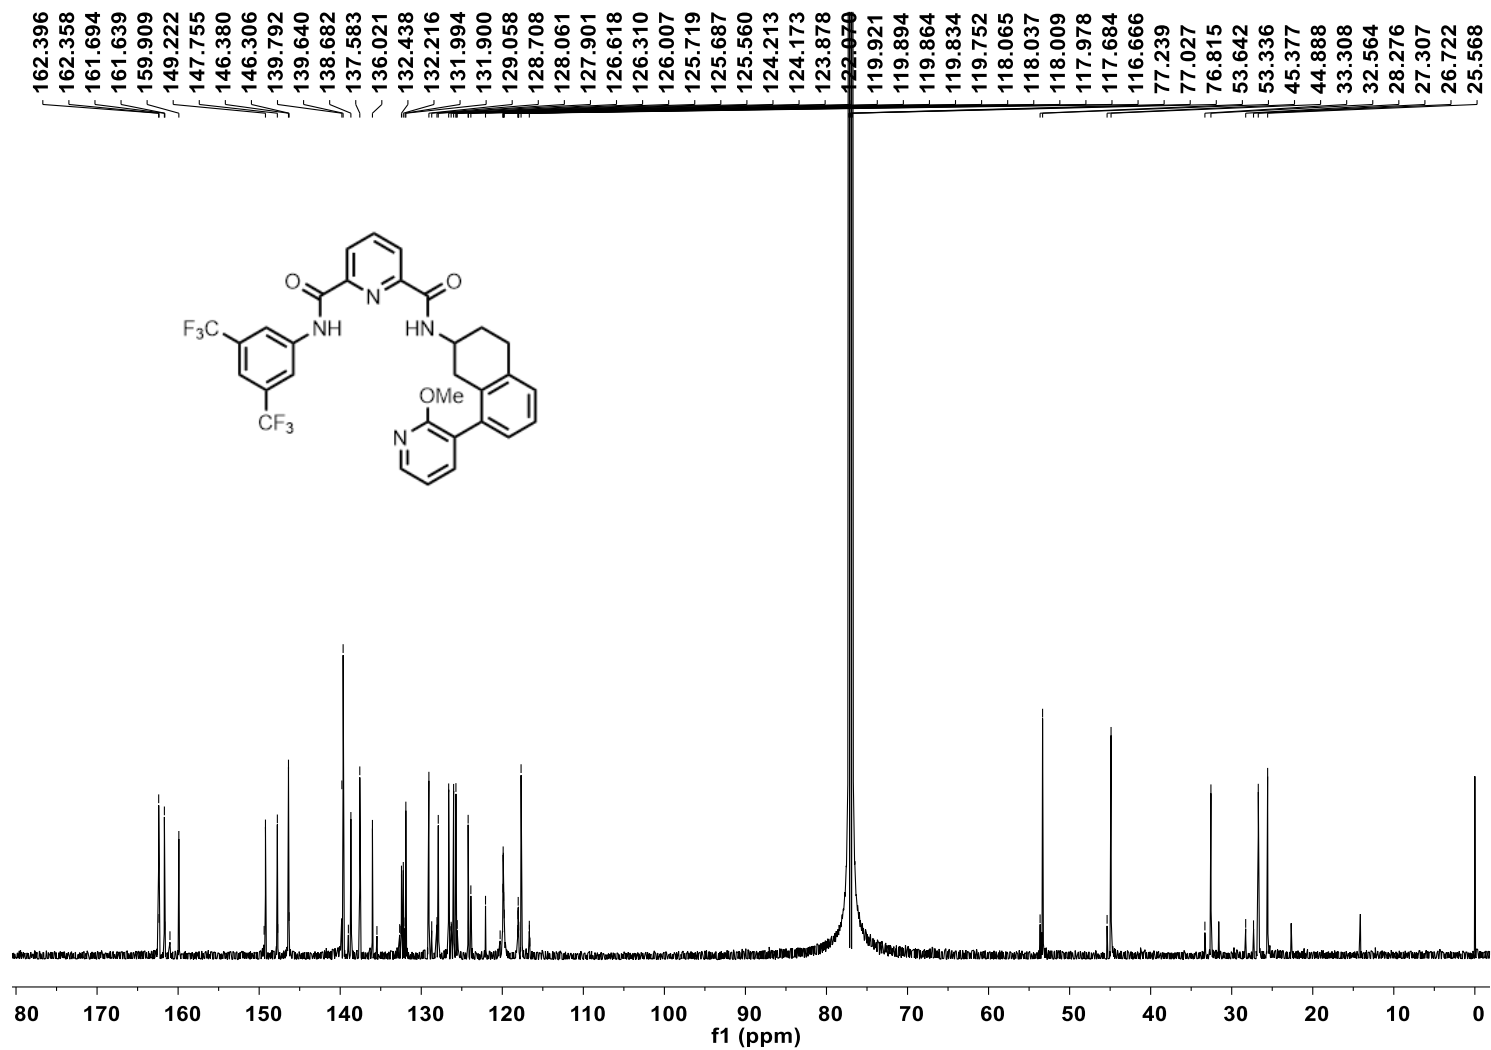



$^{19}\text{F}$  NMR (376 MHz,  $\text{CDCl}_3$ ) spectrum of **T9**

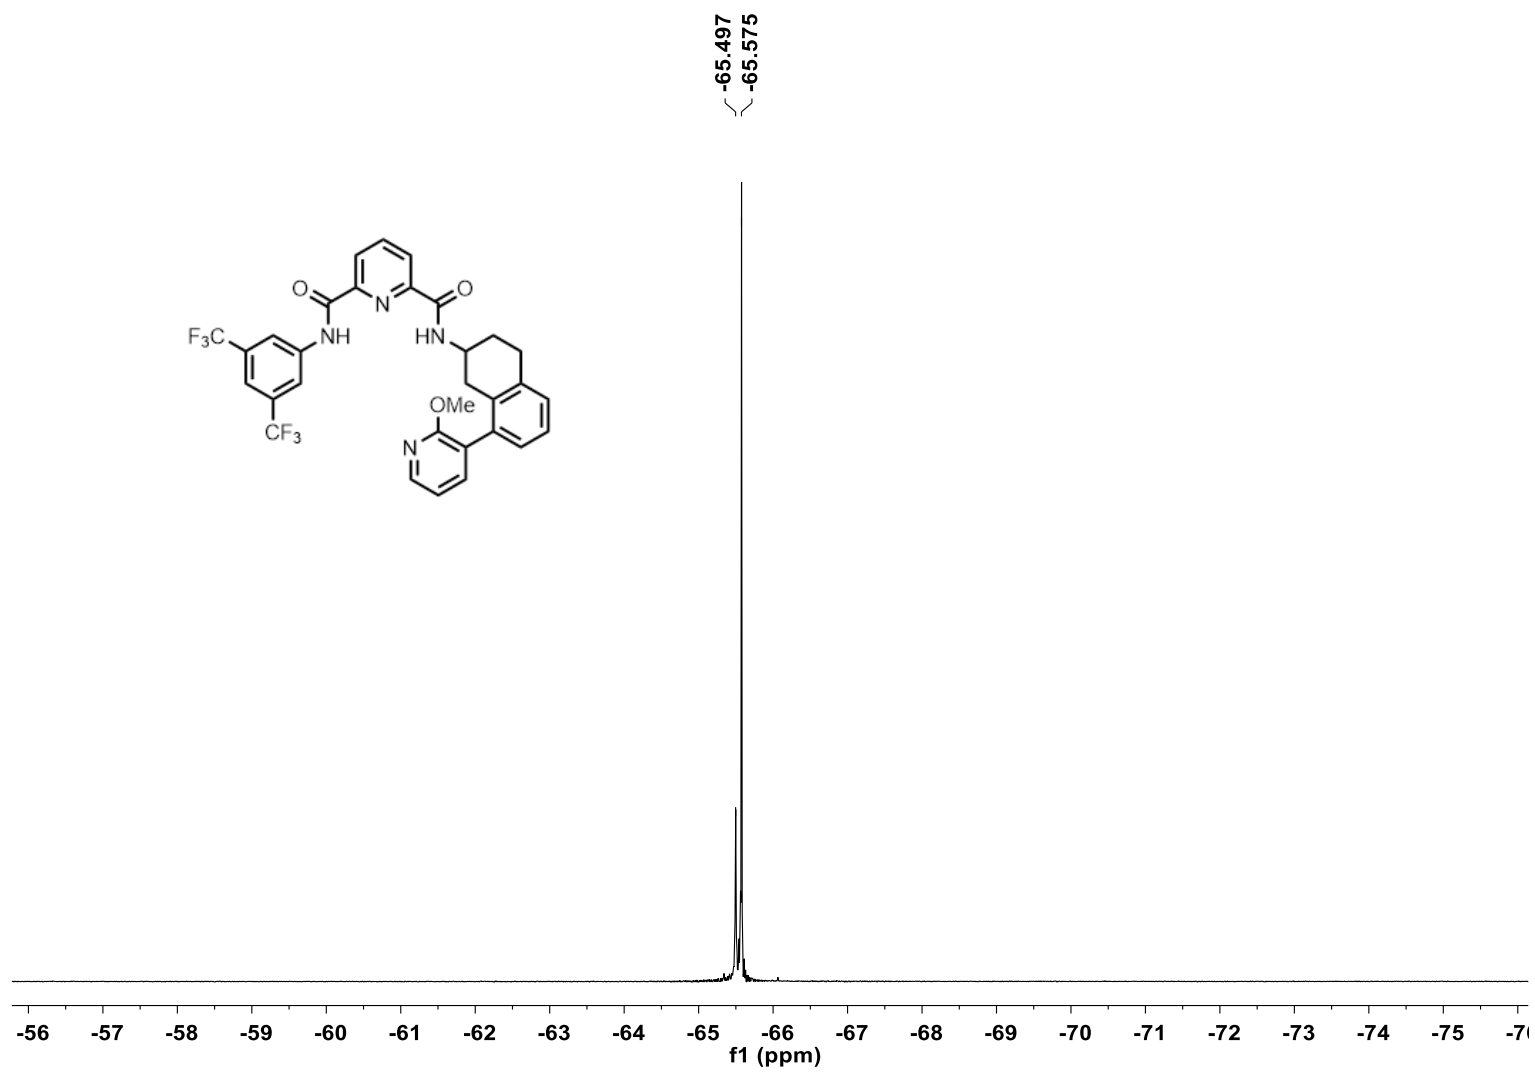

<sup>1</sup>H NMR (600 MHz, CDCl<sub>3</sub>) spectrum of T10

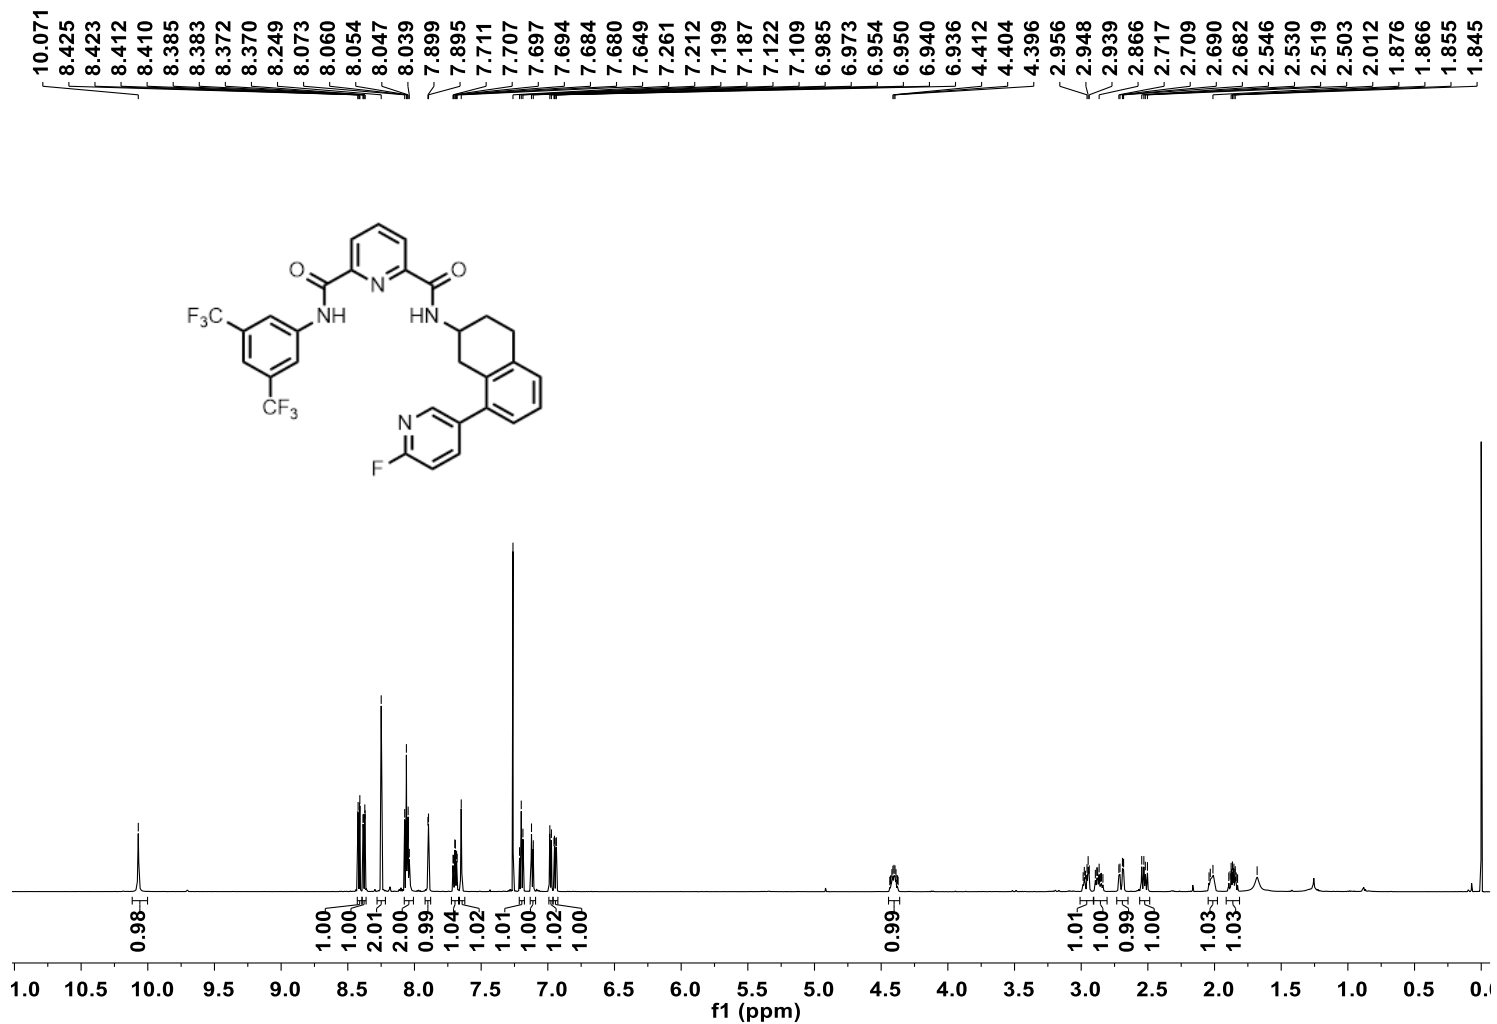

<sup>13</sup>C NMR (151 MHz, CDCl<sub>3</sub>) spectrum of T10

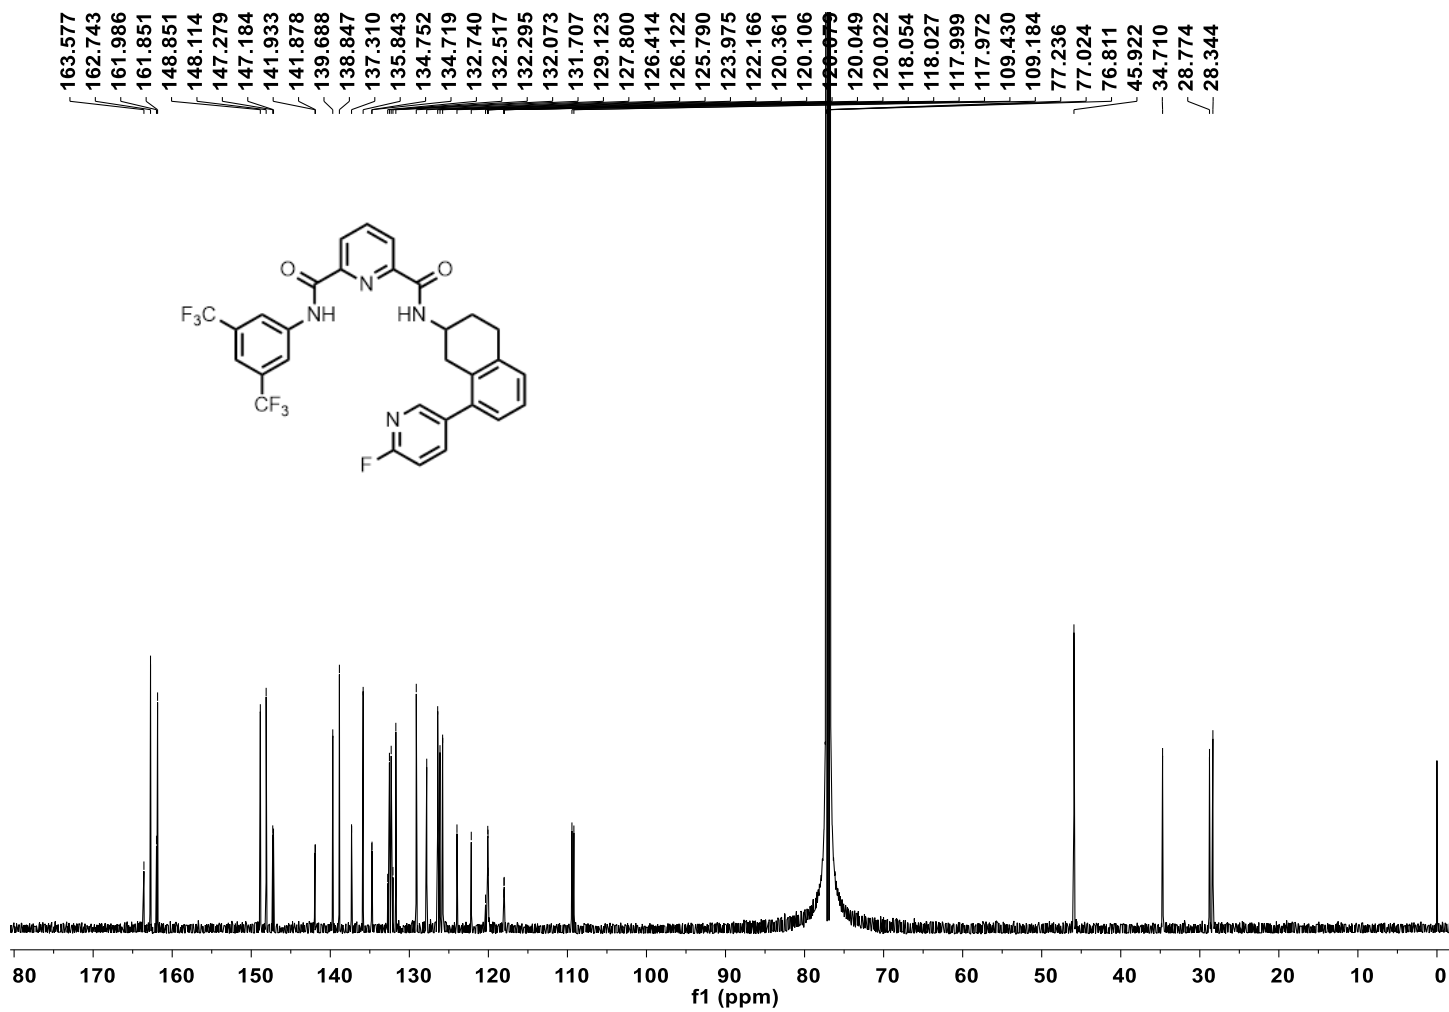

<sup>19</sup>F NMR (376 MHz, CDCl<sub>3</sub>) spectrum of **T10**

-65.525  
-72.681

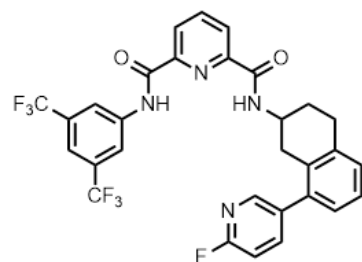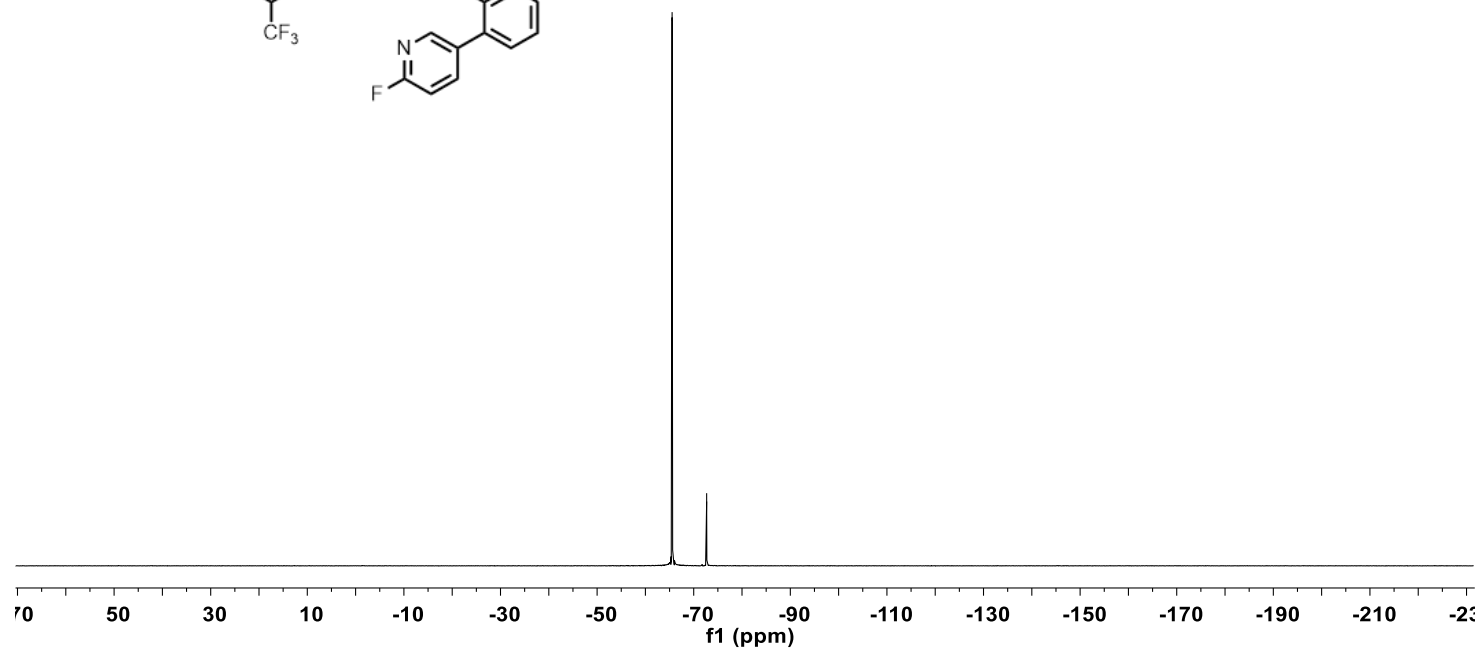

<sup>1</sup>H NMR (600 MHz, CDCl<sub>3</sub>) spectrum of T11

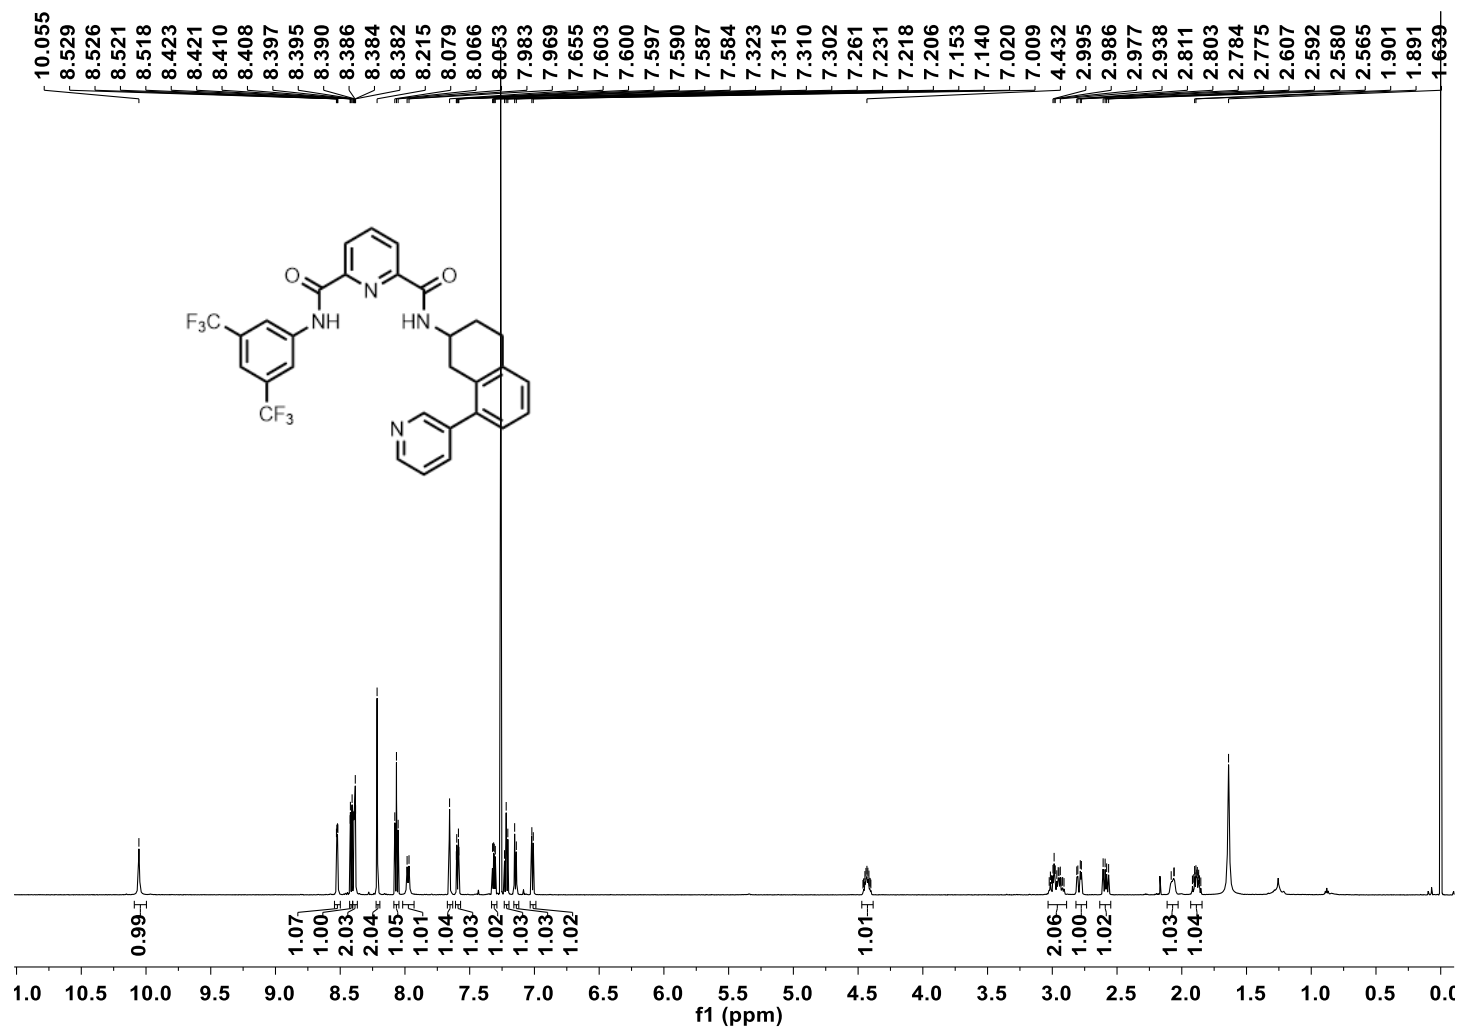

<sup>13</sup>C NMR (151 MHz, CDCl<sub>3</sub>) spectrum of T11

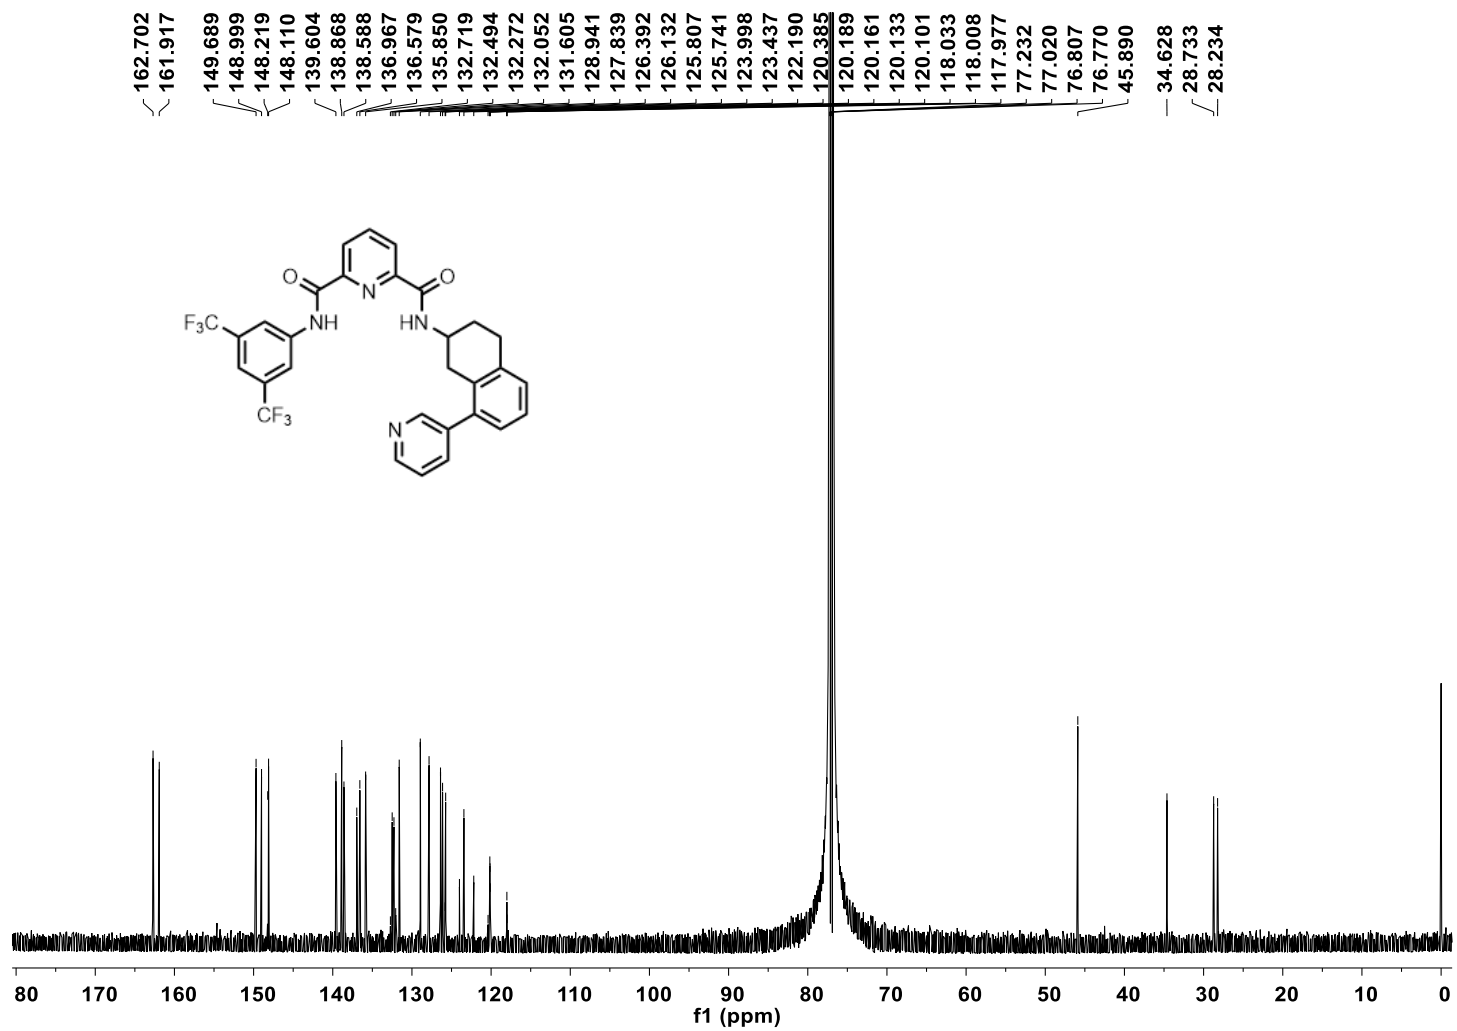

$^{19}\text{F}$  NMR (376 MHz,  $\text{CDCl}_3$ ) spectrum of **T11**

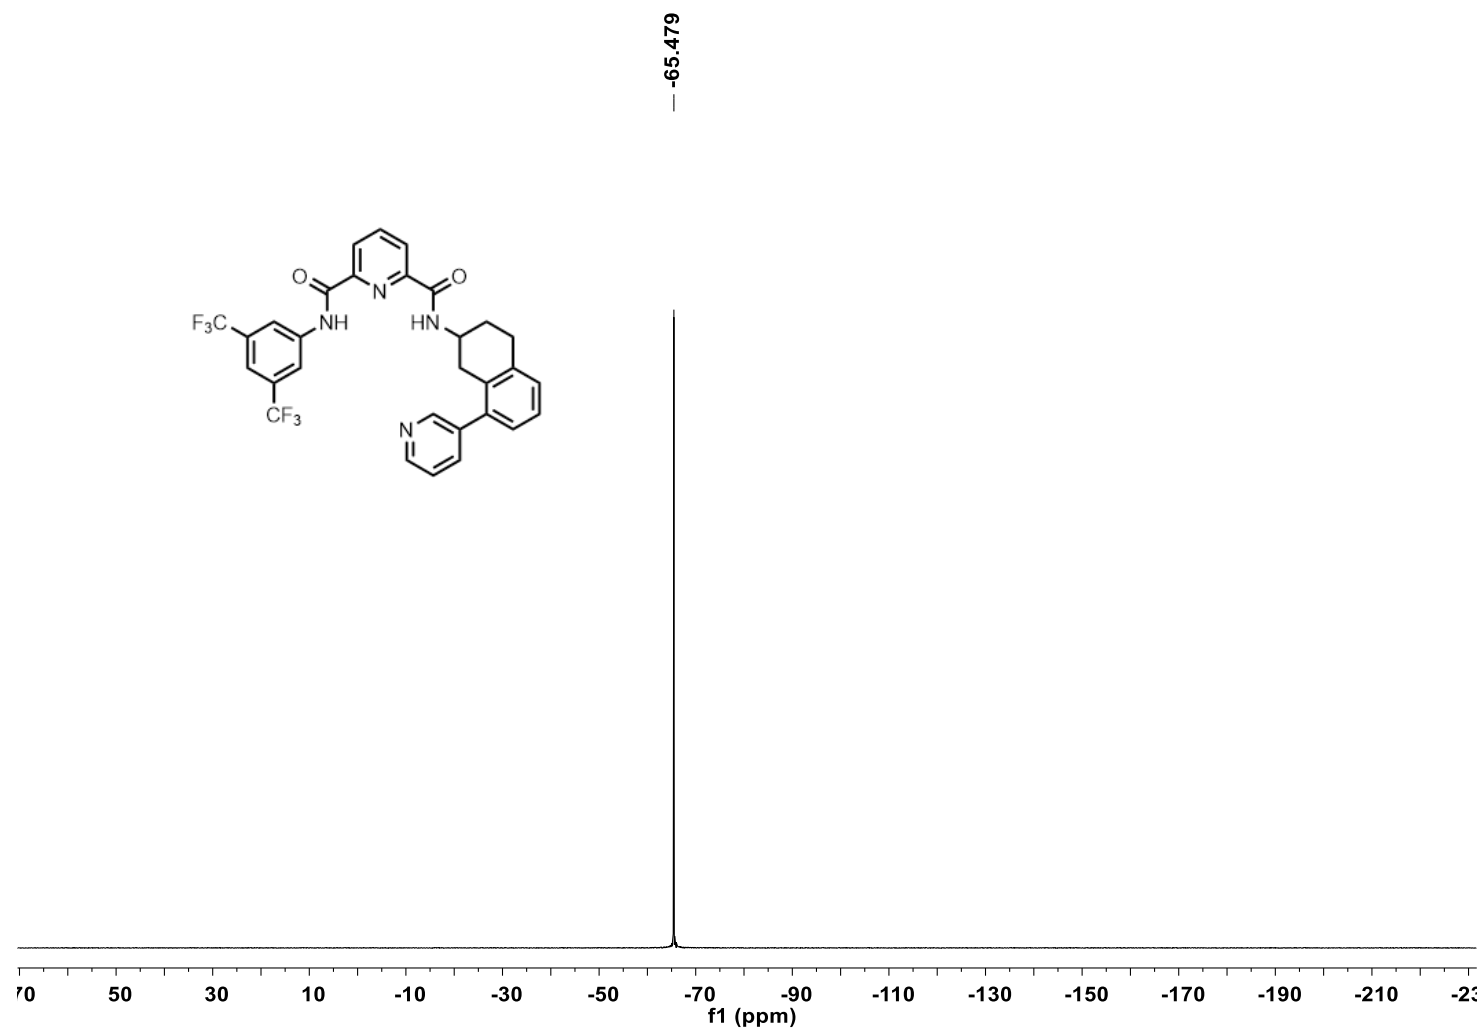

<sup>1</sup>H NMR (600 MHz, CDCl<sub>3</sub>) spectrum of T12

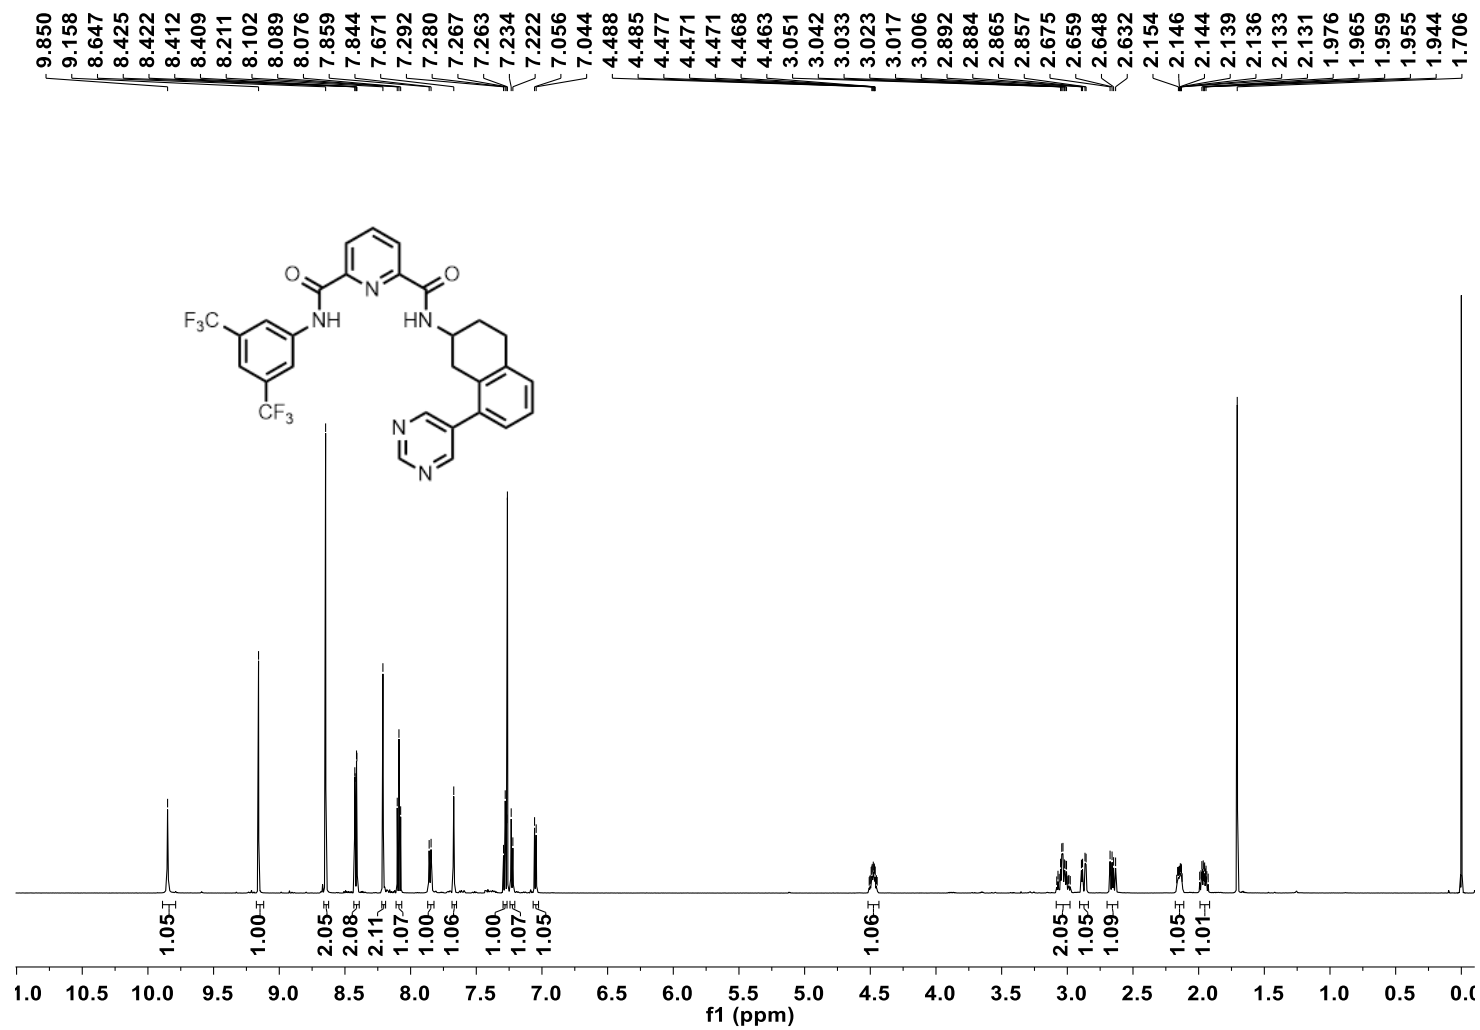



<sup>13</sup>C NMR (151 MHz, CDCl<sub>3</sub>) spectrum of T12

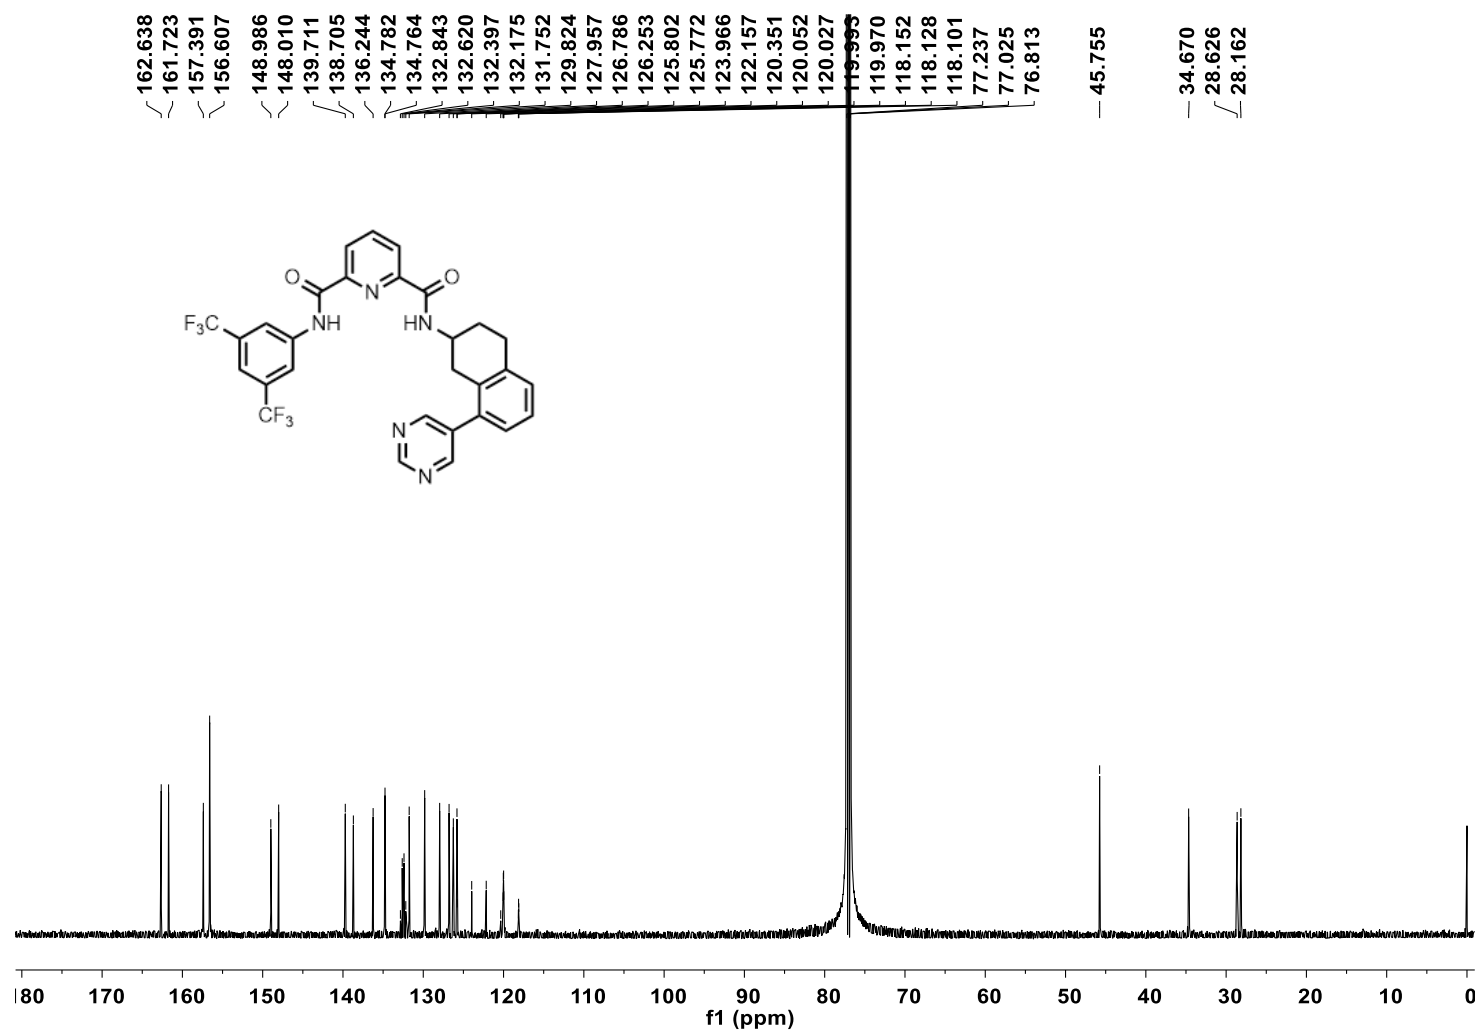

<sup>19</sup>F NMR (376 MHz, CDCl<sub>3</sub>) spectrum of **T12**

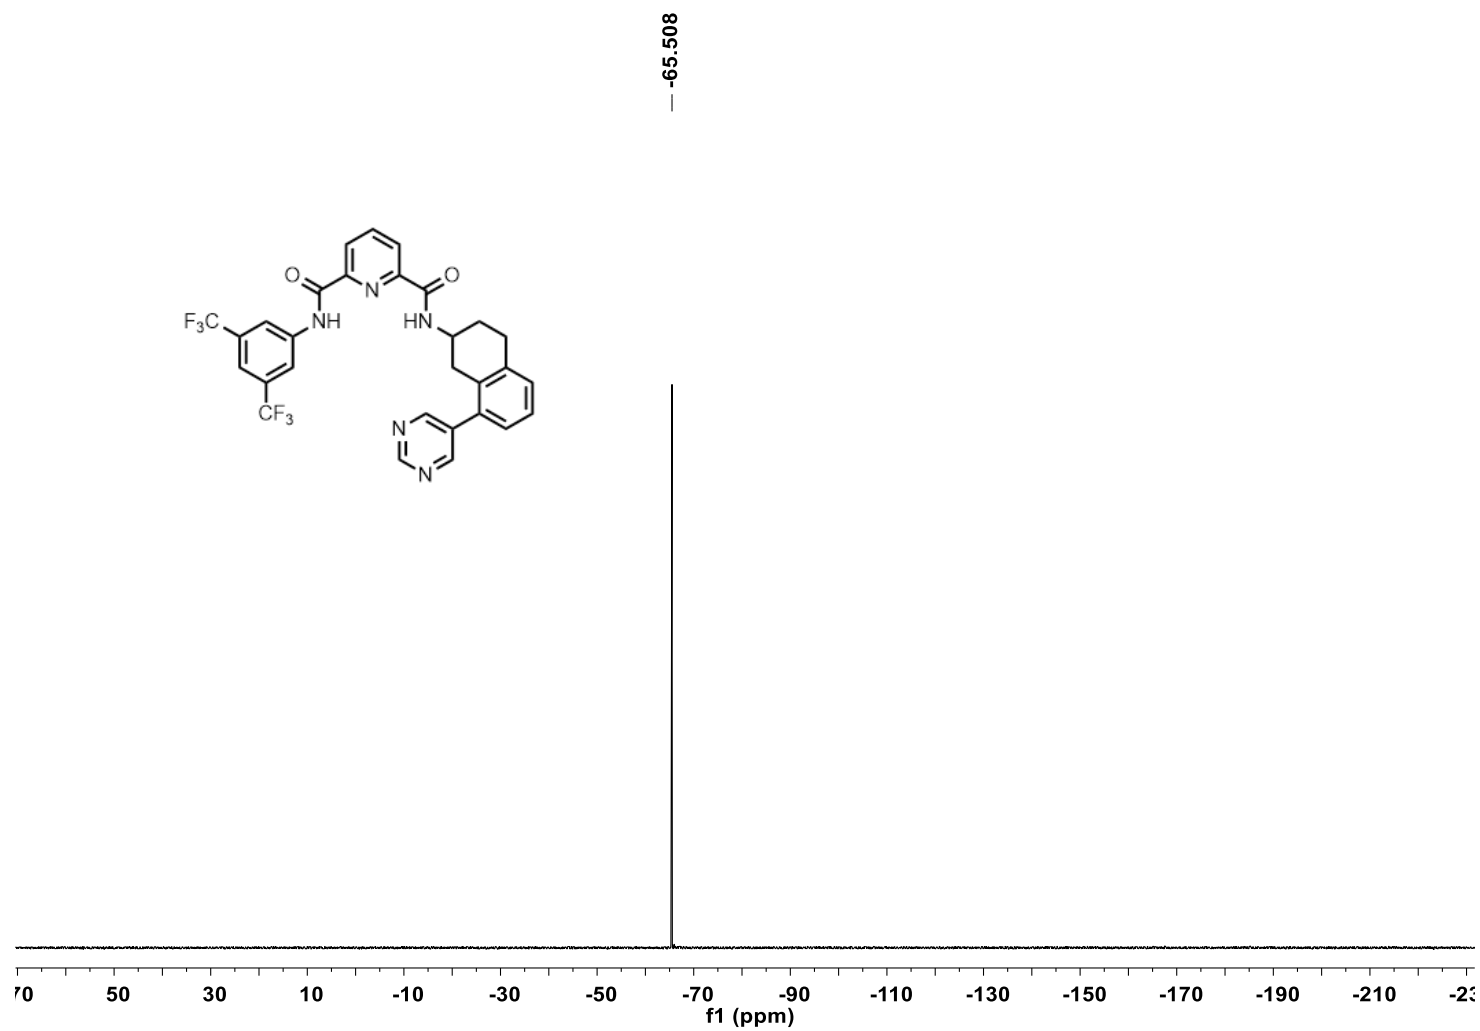

<sup>1</sup>H NMR (600 MHz, CDCl<sub>3</sub>) spectrum of T13

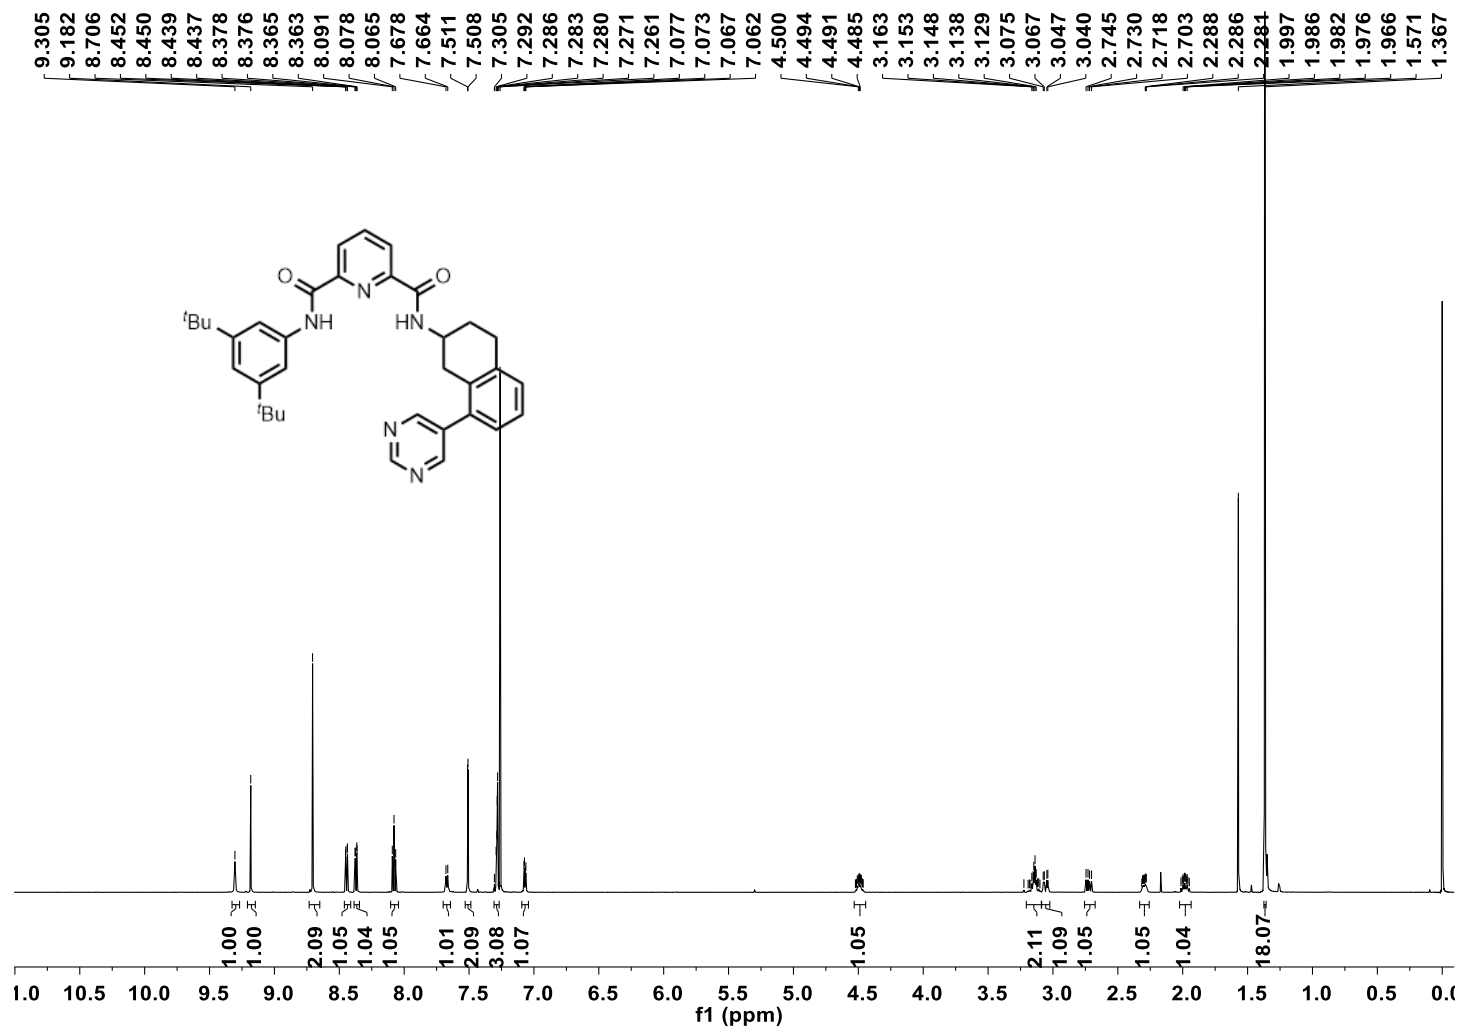

<sup>13</sup>C NMR (151 MHz, CDCl<sub>3</sub>) spectrum of T13

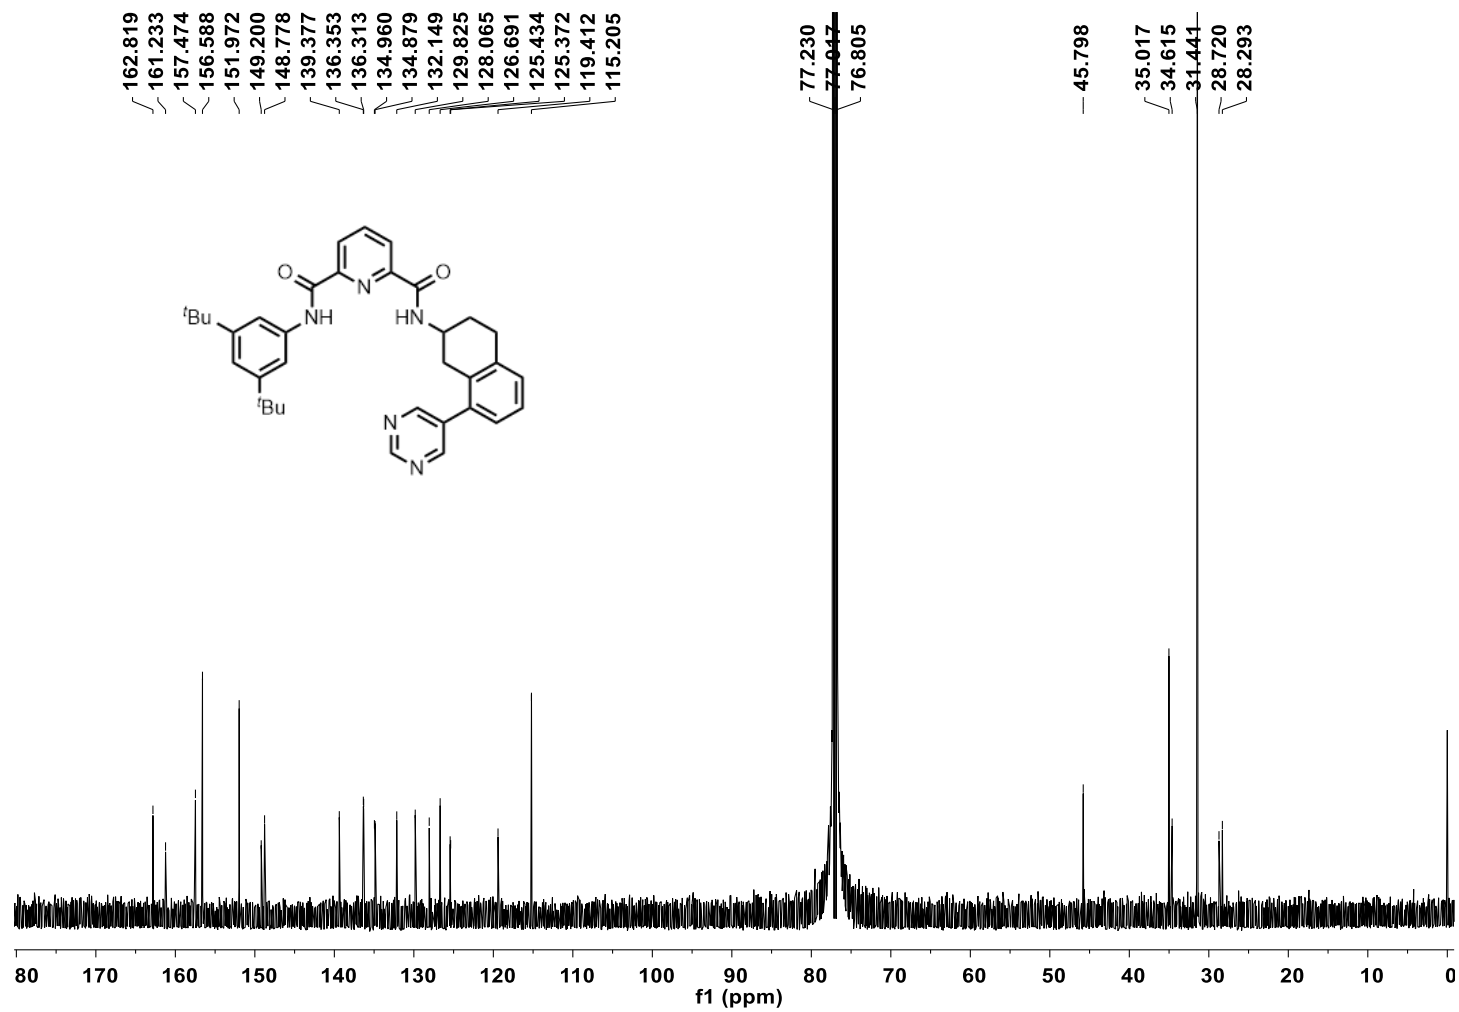

<sup>1</sup>H NMR (600 MHz, CDCl<sub>3</sub>) spectrum of T14

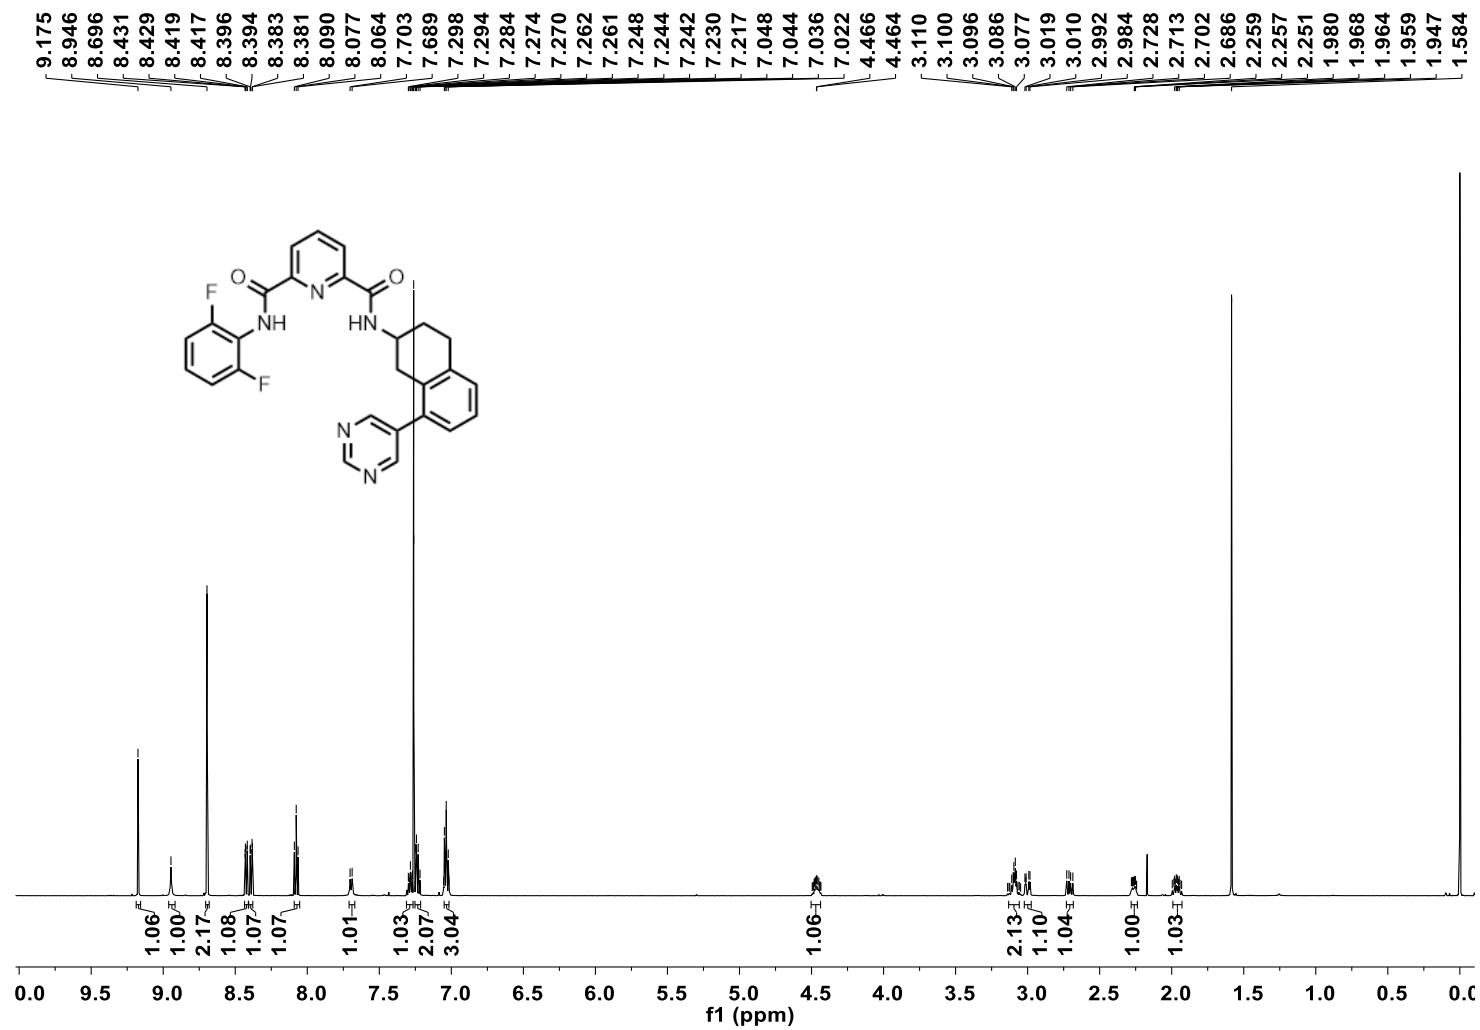

<sup>13</sup>C NMR (151 MHz, CDCl<sub>3</sub>) spectrum of T14

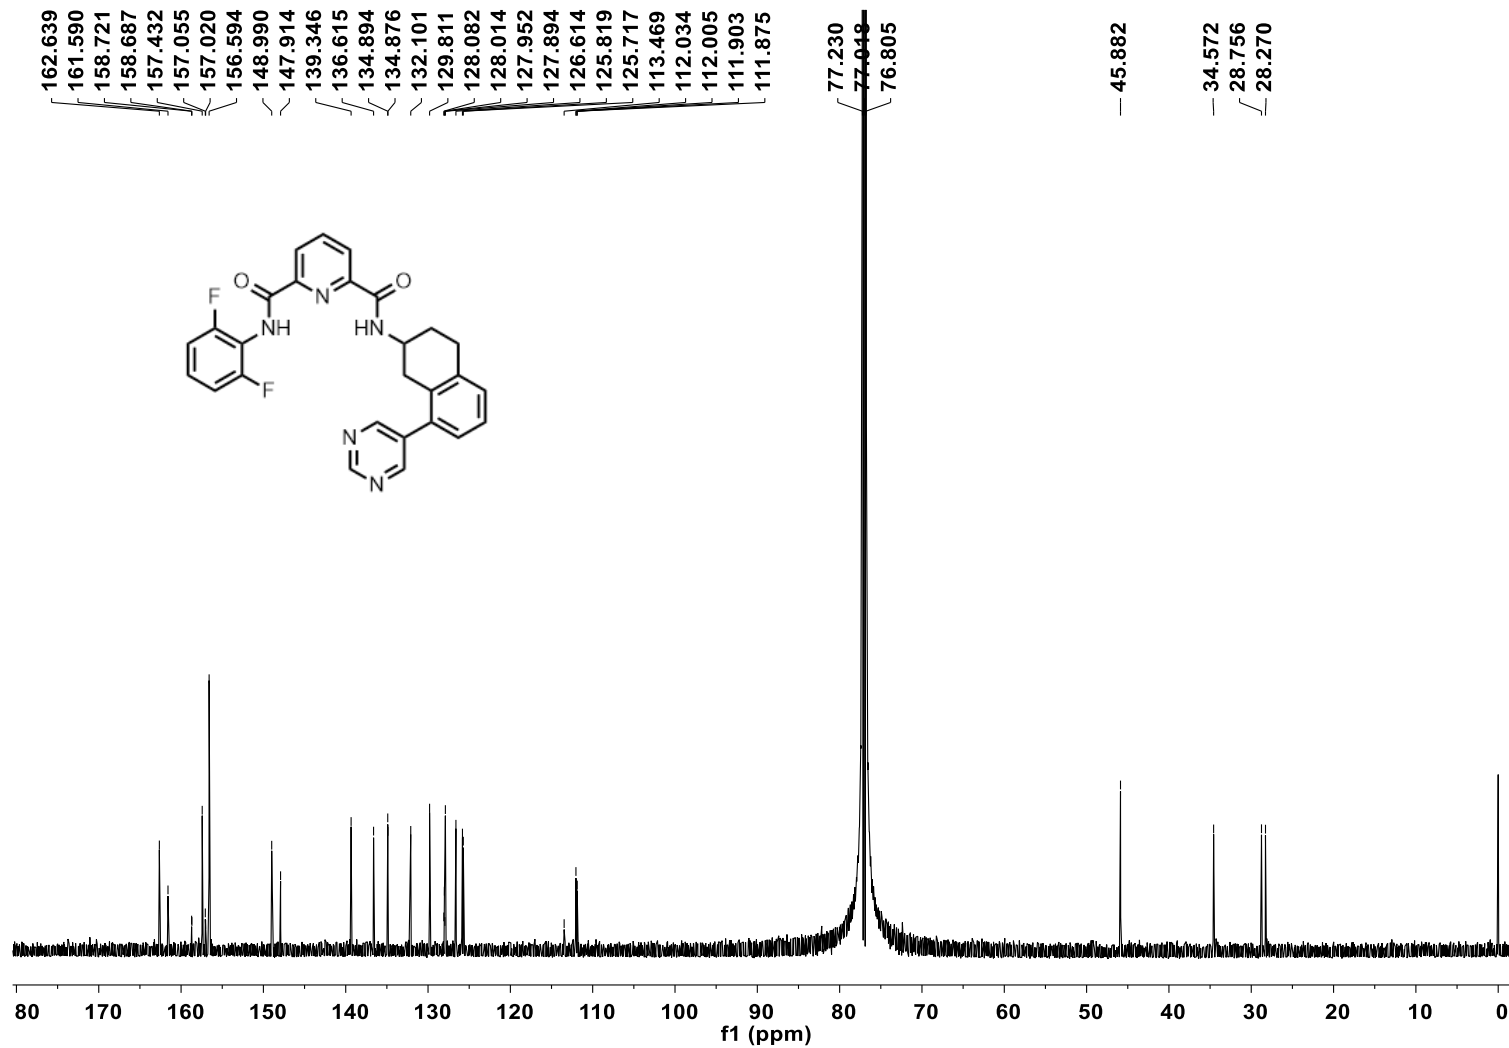

<sup>19</sup>F NMR (376 MHz, CDCl<sub>3</sub>) spectrum of T14

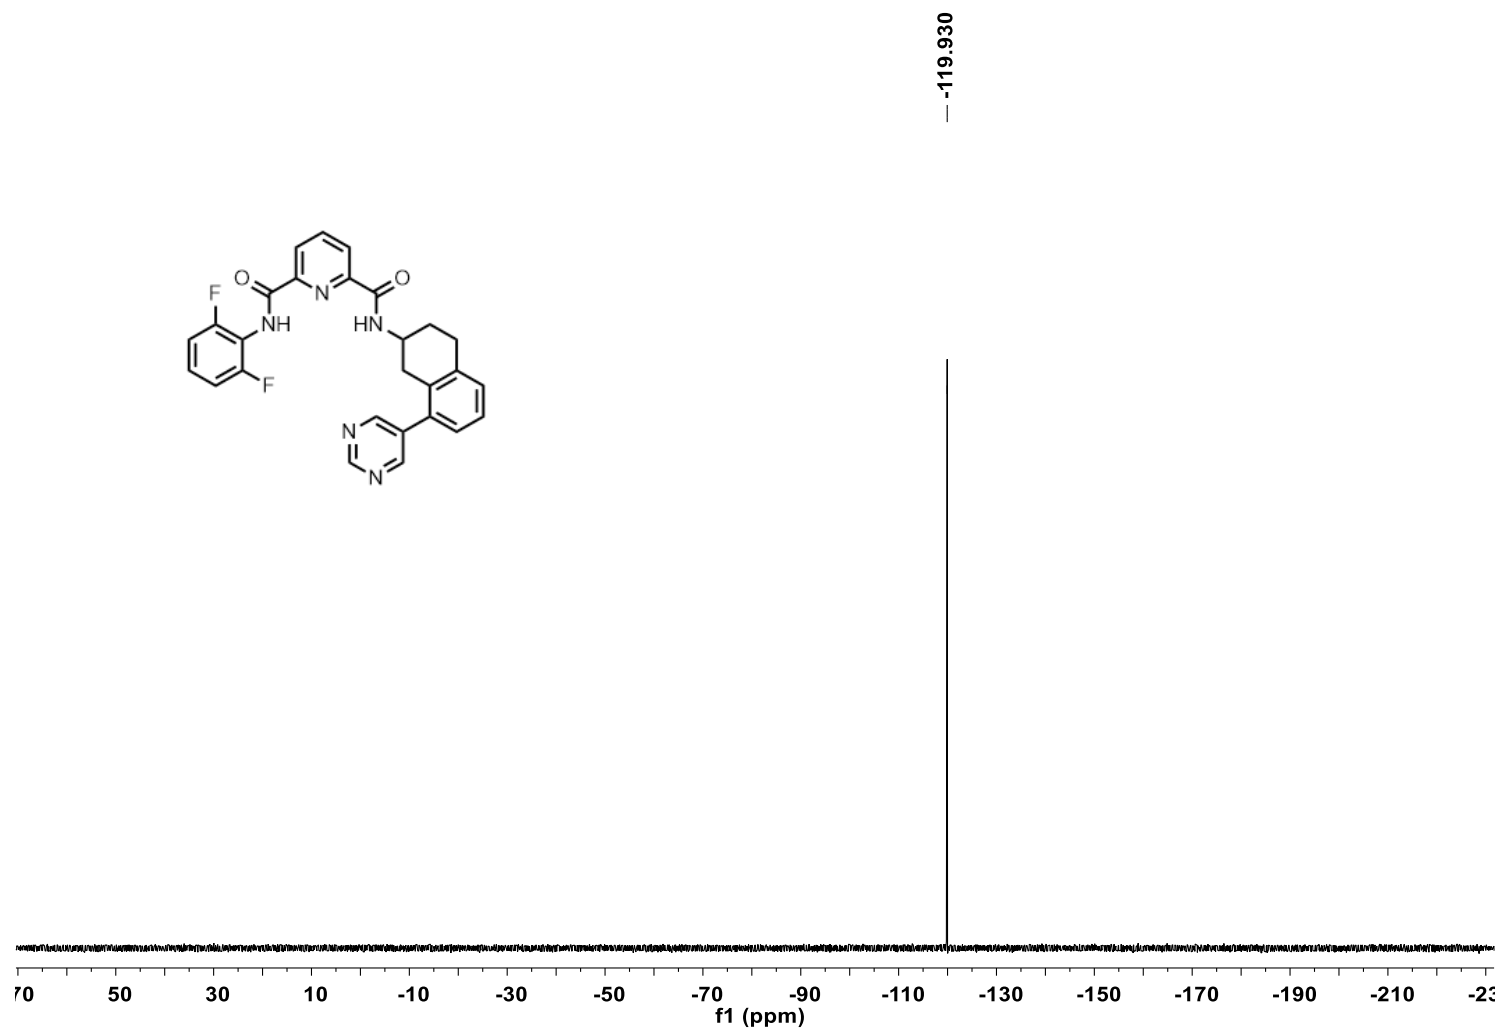

<sup>1</sup>H NMR (600 MHz, CDCl<sub>3</sub>) spectrum of T15

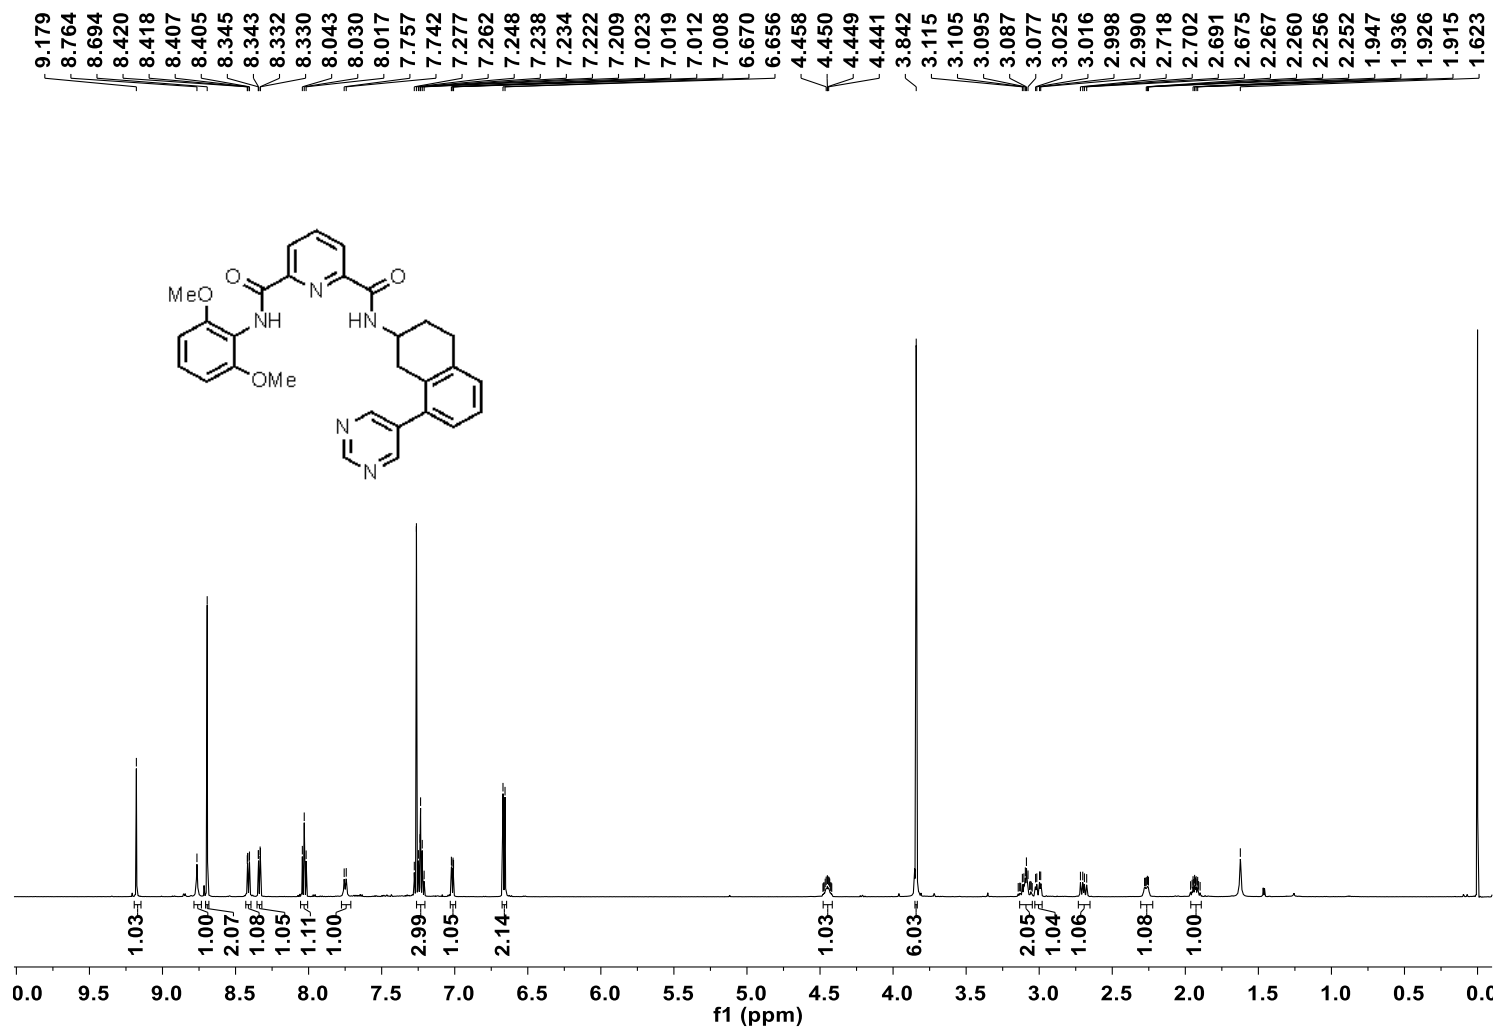



<sup>13</sup>C NMR (151 MHz, CDCl<sub>3</sub>) spectrum of T15

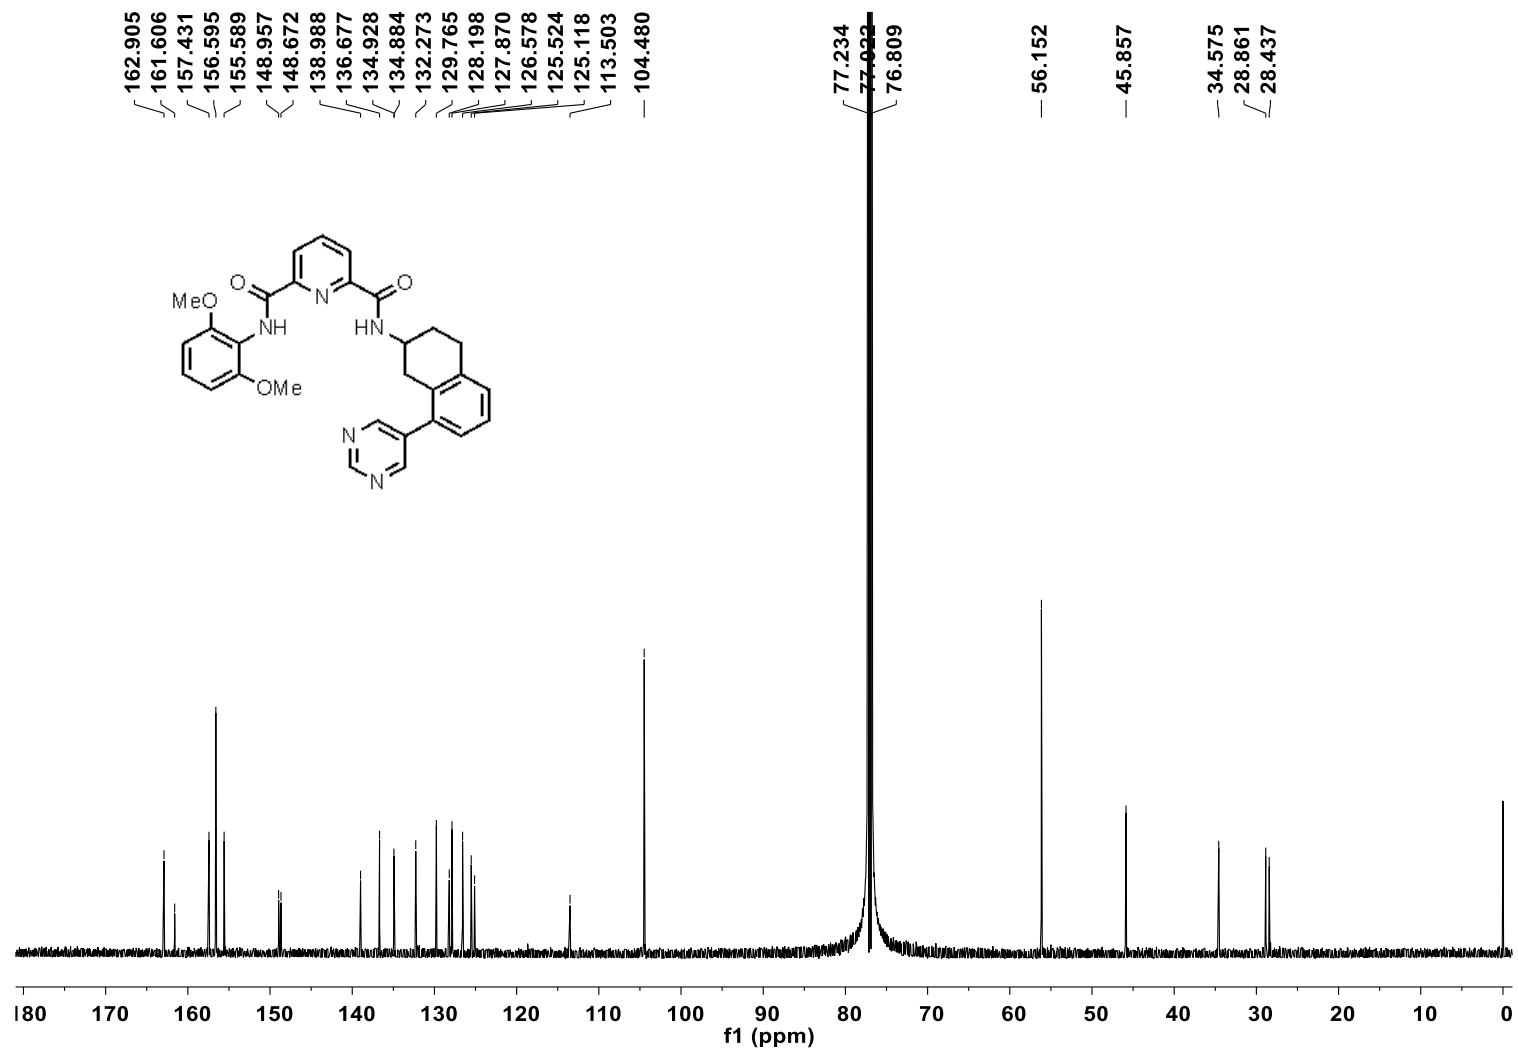

<sup>1</sup>H NMR (600 MHz, CDCl<sub>3</sub>) spectrum of T16

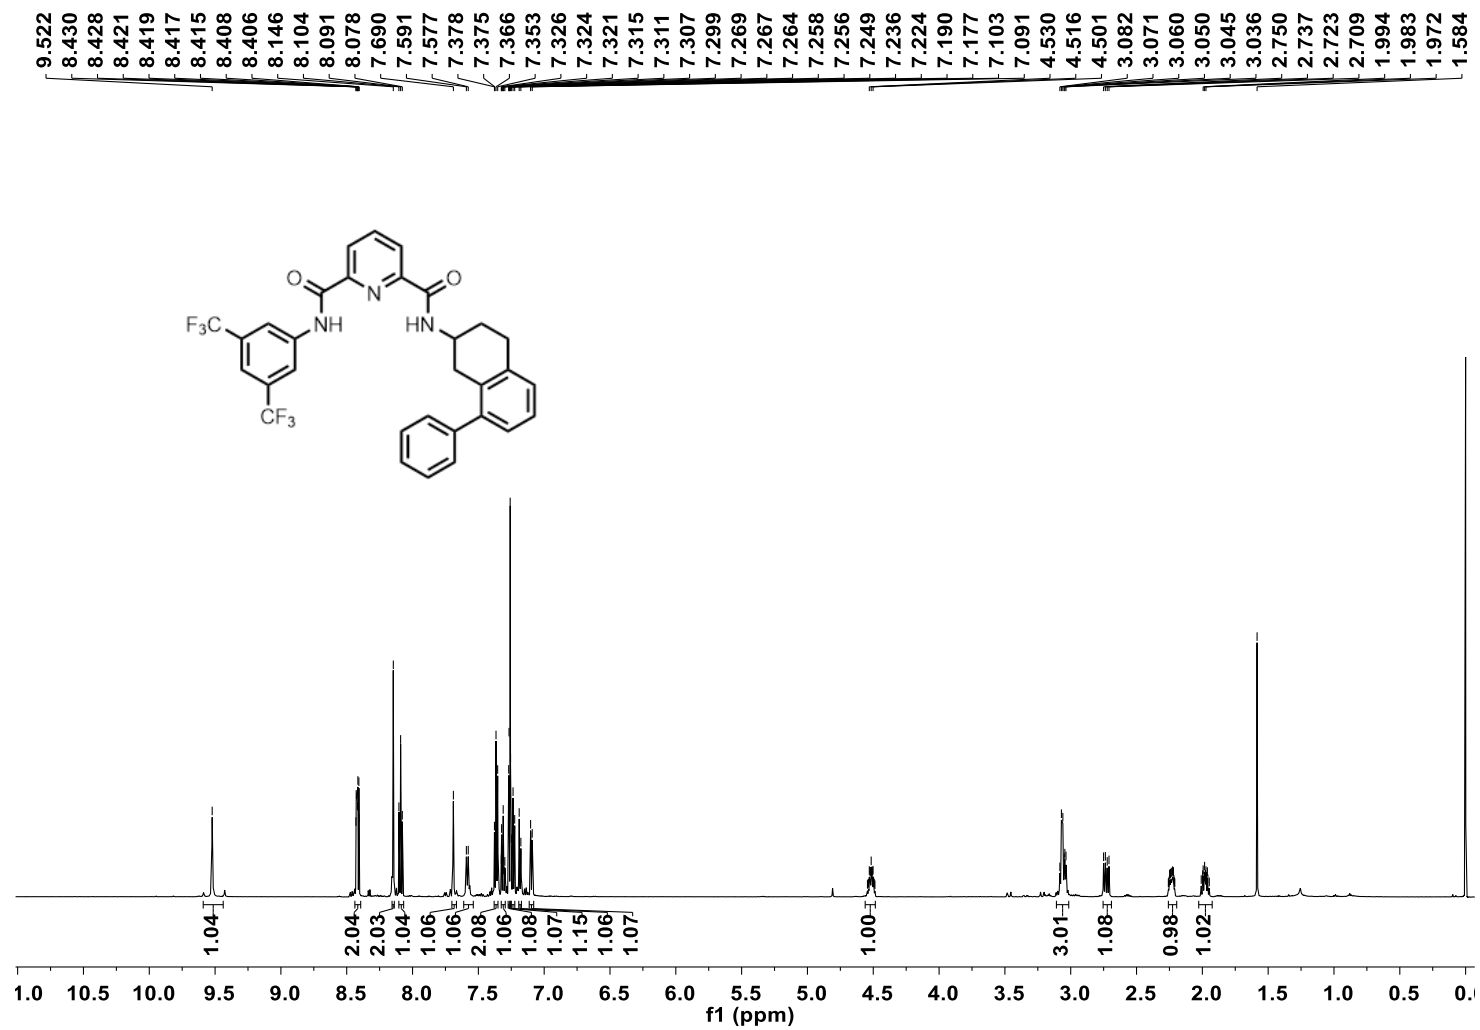

<sup>13</sup>C NMR (151 MHz, CDCl<sub>3</sub>) spectrum of T16

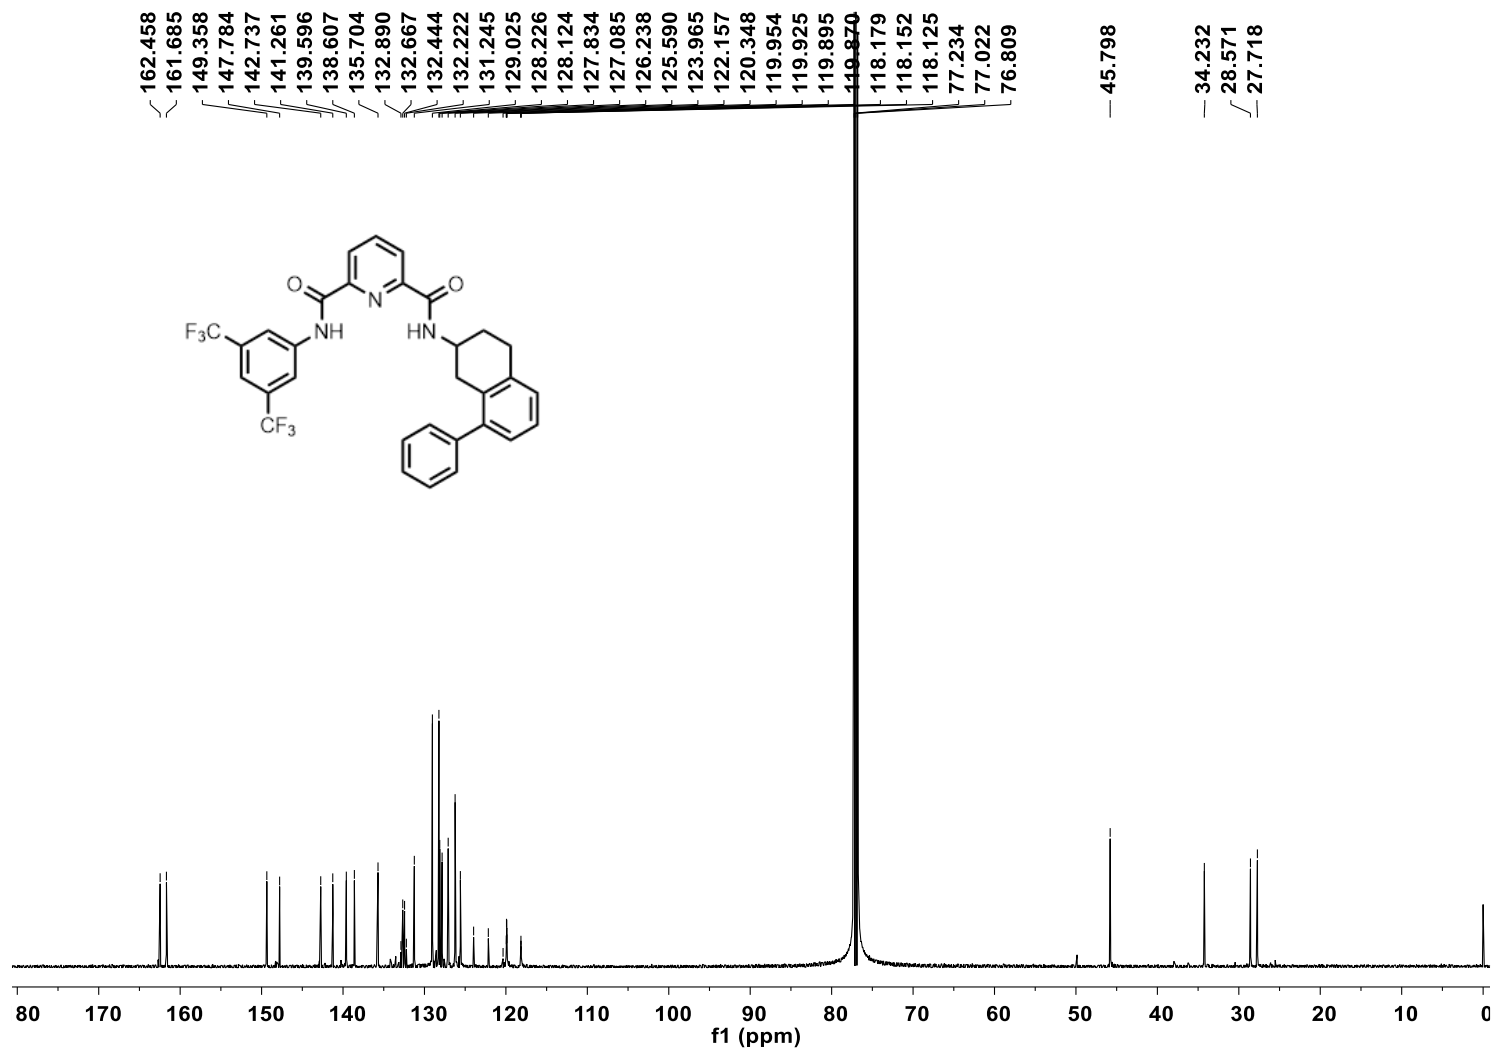

<sup>19</sup>F NMR (376 MHz, CDCl<sub>3</sub>) spectrum of **T16**

-65.495

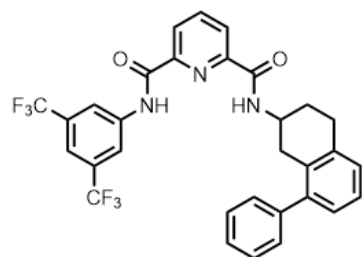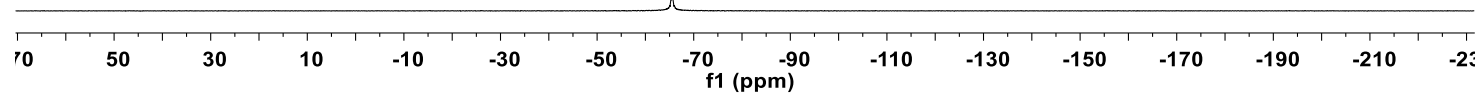

<sup>1</sup>H NMR (600 MHz, CDCl<sub>3</sub>) spectrum of T17

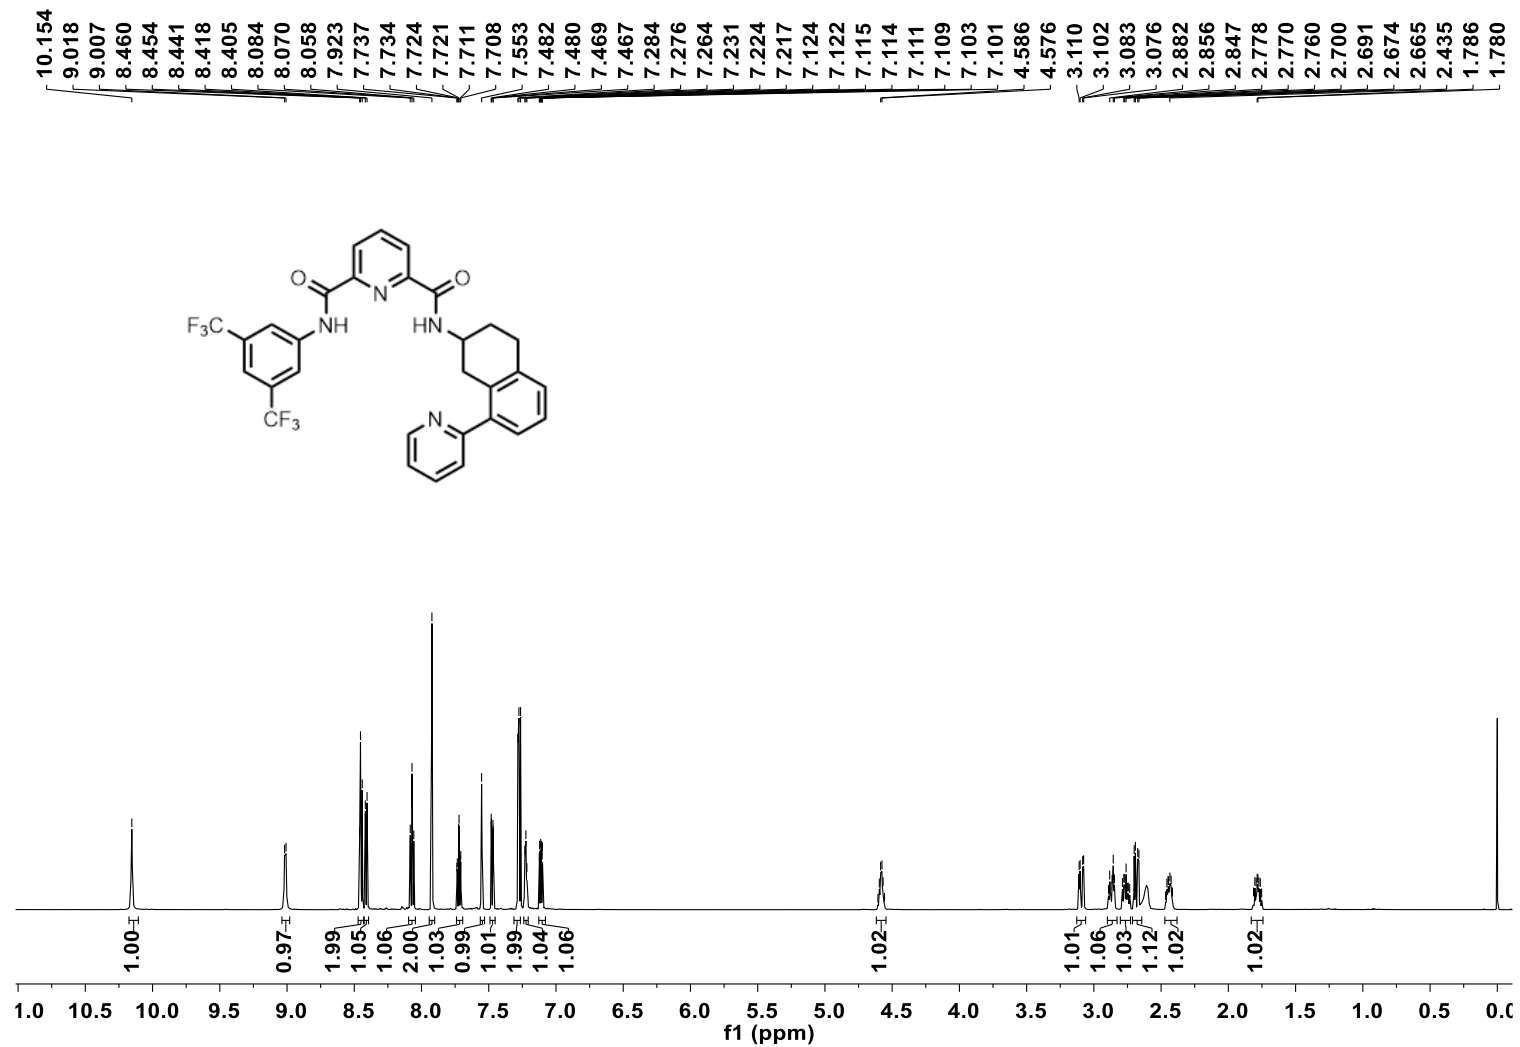

<sup>13</sup>C NMR (151 MHz, CDCl<sub>3</sub>) spectrum of T17

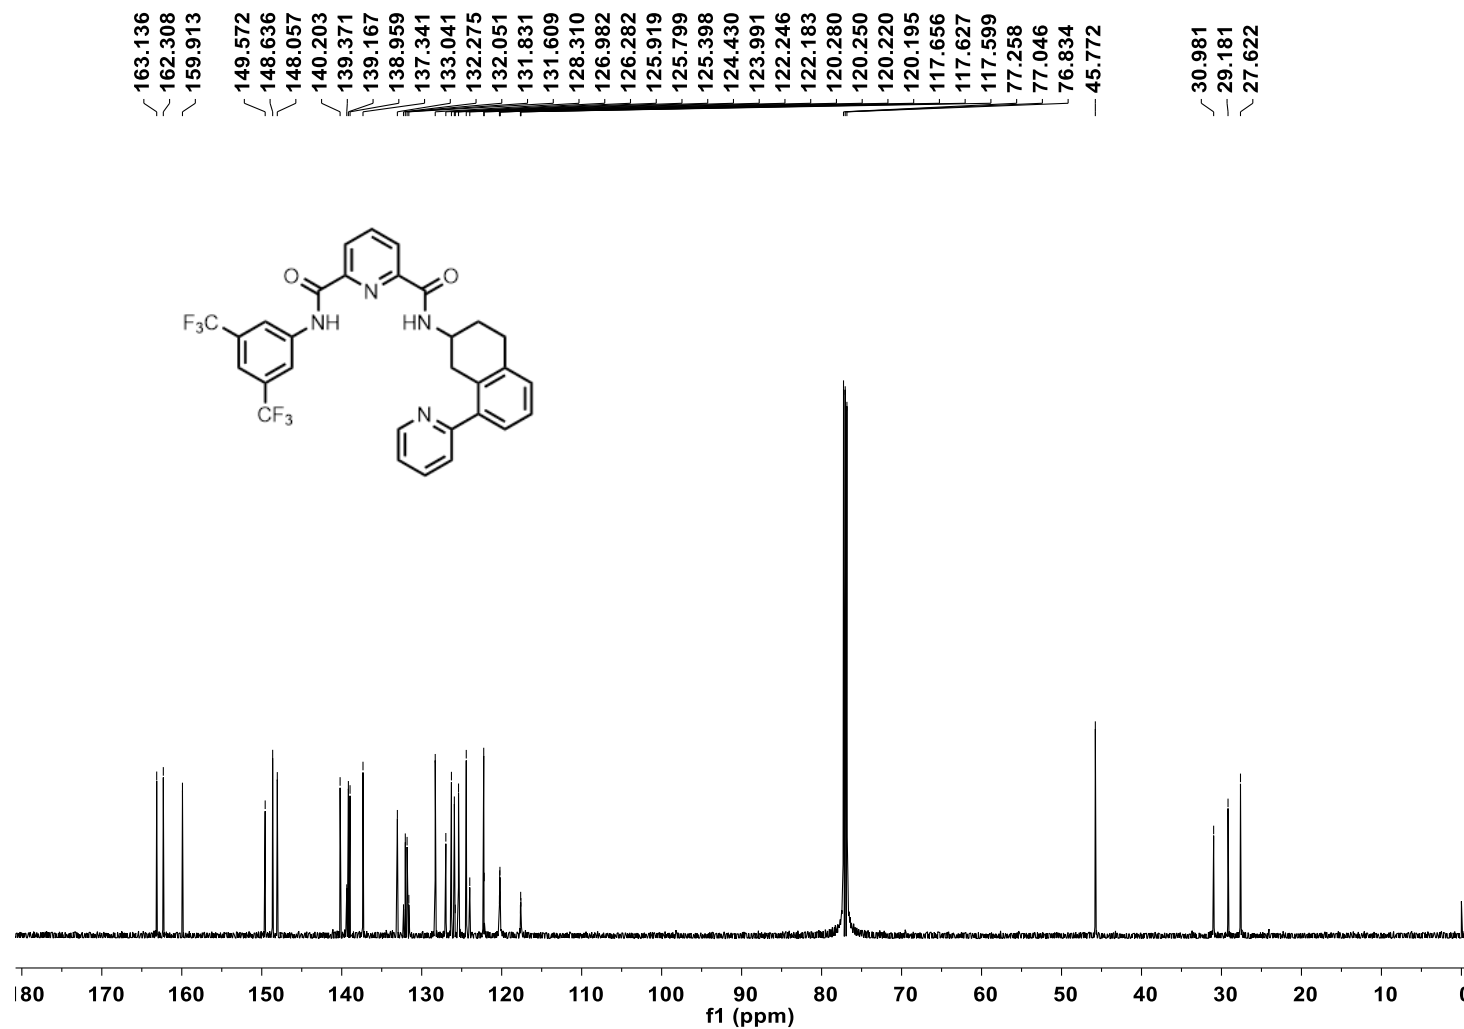

$^{19}\text{F}$  NMR (376 MHz,  $\text{CDCl}_3$ ) spectrum of **T17**

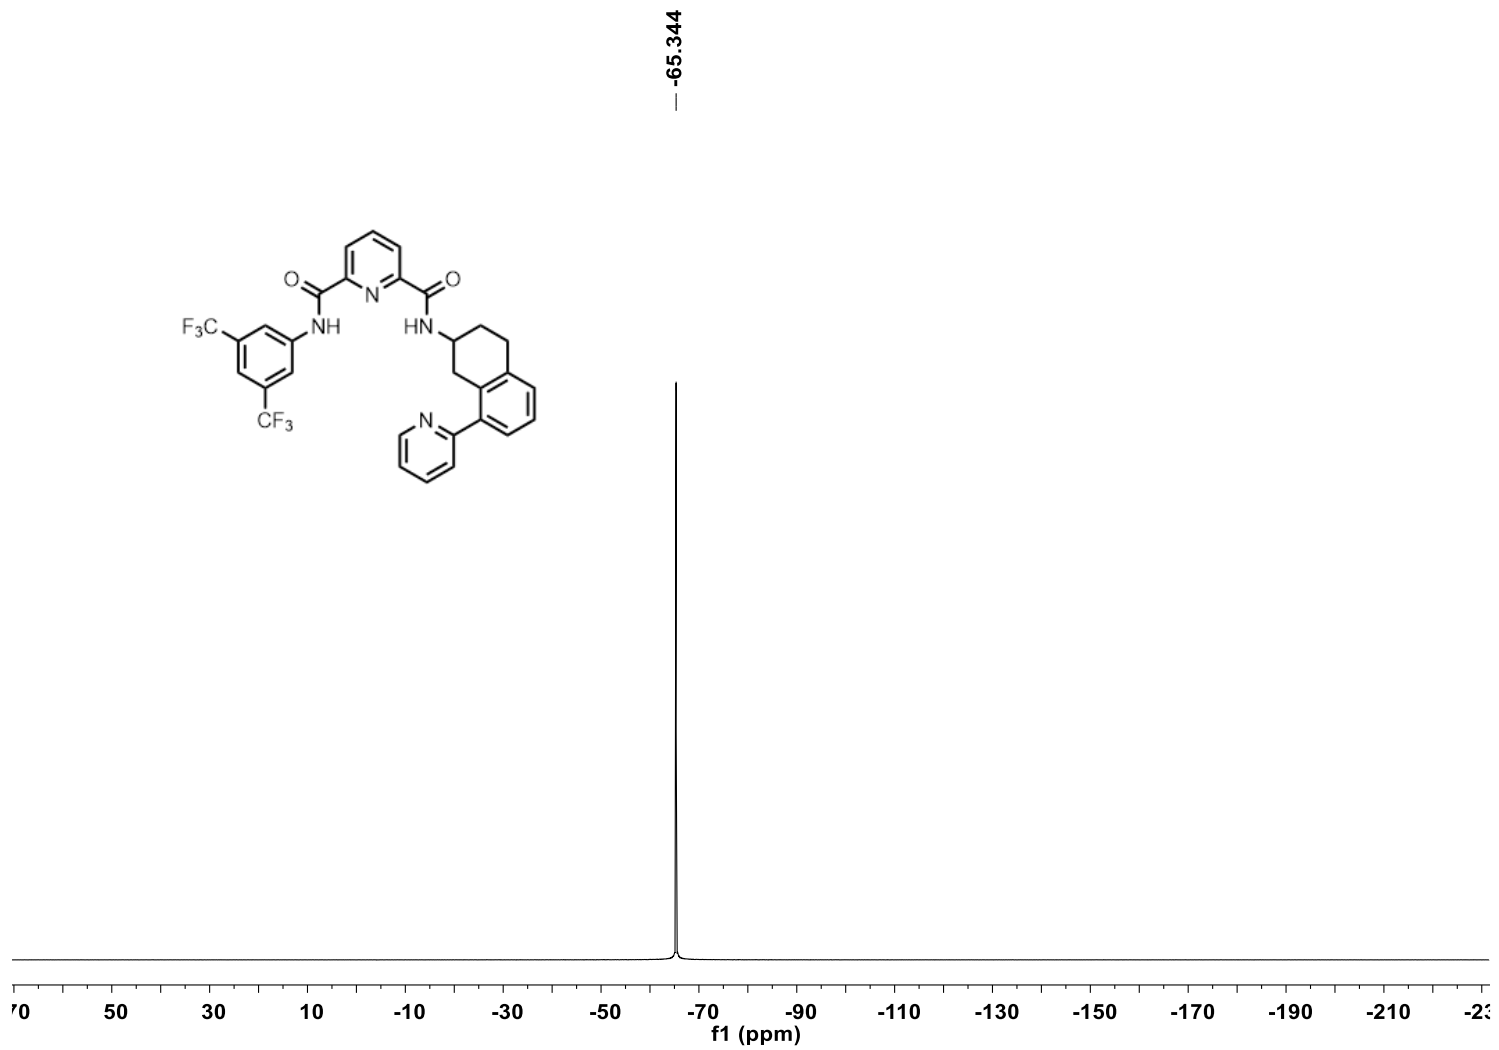

<sup>1</sup>H NMR (600 MHz, CDCl<sub>3</sub>) spectrum of T18

9.765  
9.008  
8.977  
8.468  
8.452  
8.424  
8.411  
8.401  
8.389  
8.099  
8.086  
8.073  
8.066  
7.576  
7.458  
7.445  
7.437  
7.426  
7.412  
7.265  
7.189  
7.177  
6.044  
6.040  
6.036  
6.031  
6.029  
6.024  
6.020  
6.016  
3.875  
3.866  
3.850  
3.842  
3.342  
3.338  
3.318  
3.314  
1.852

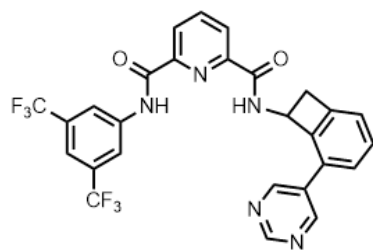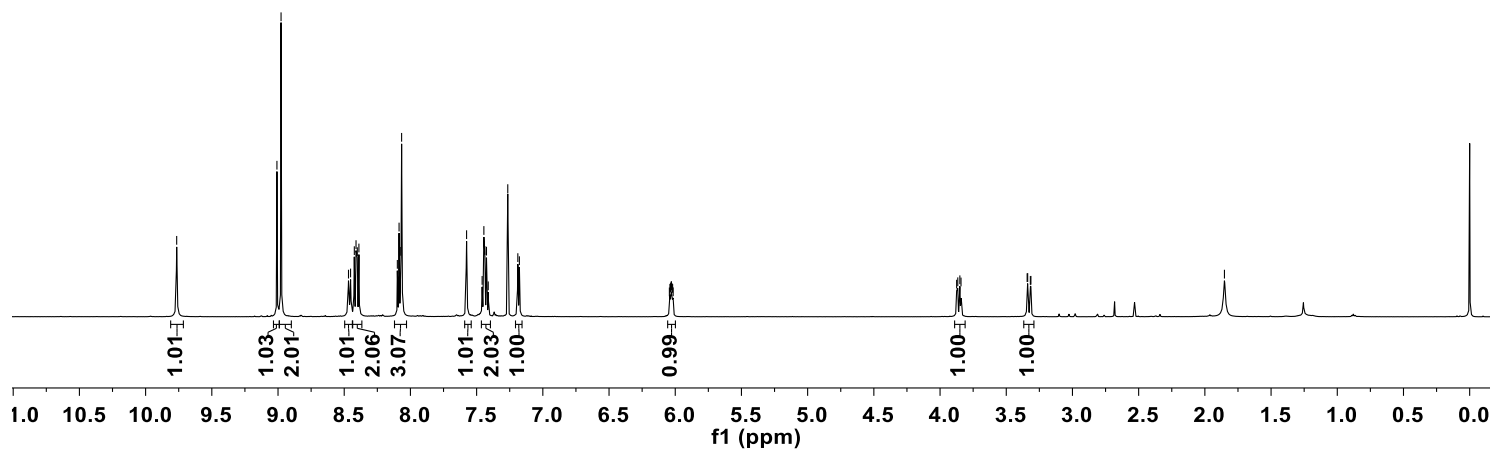



<sup>13</sup>C NMR (151 MHz, CDCl<sub>3</sub>) spectrum of T18

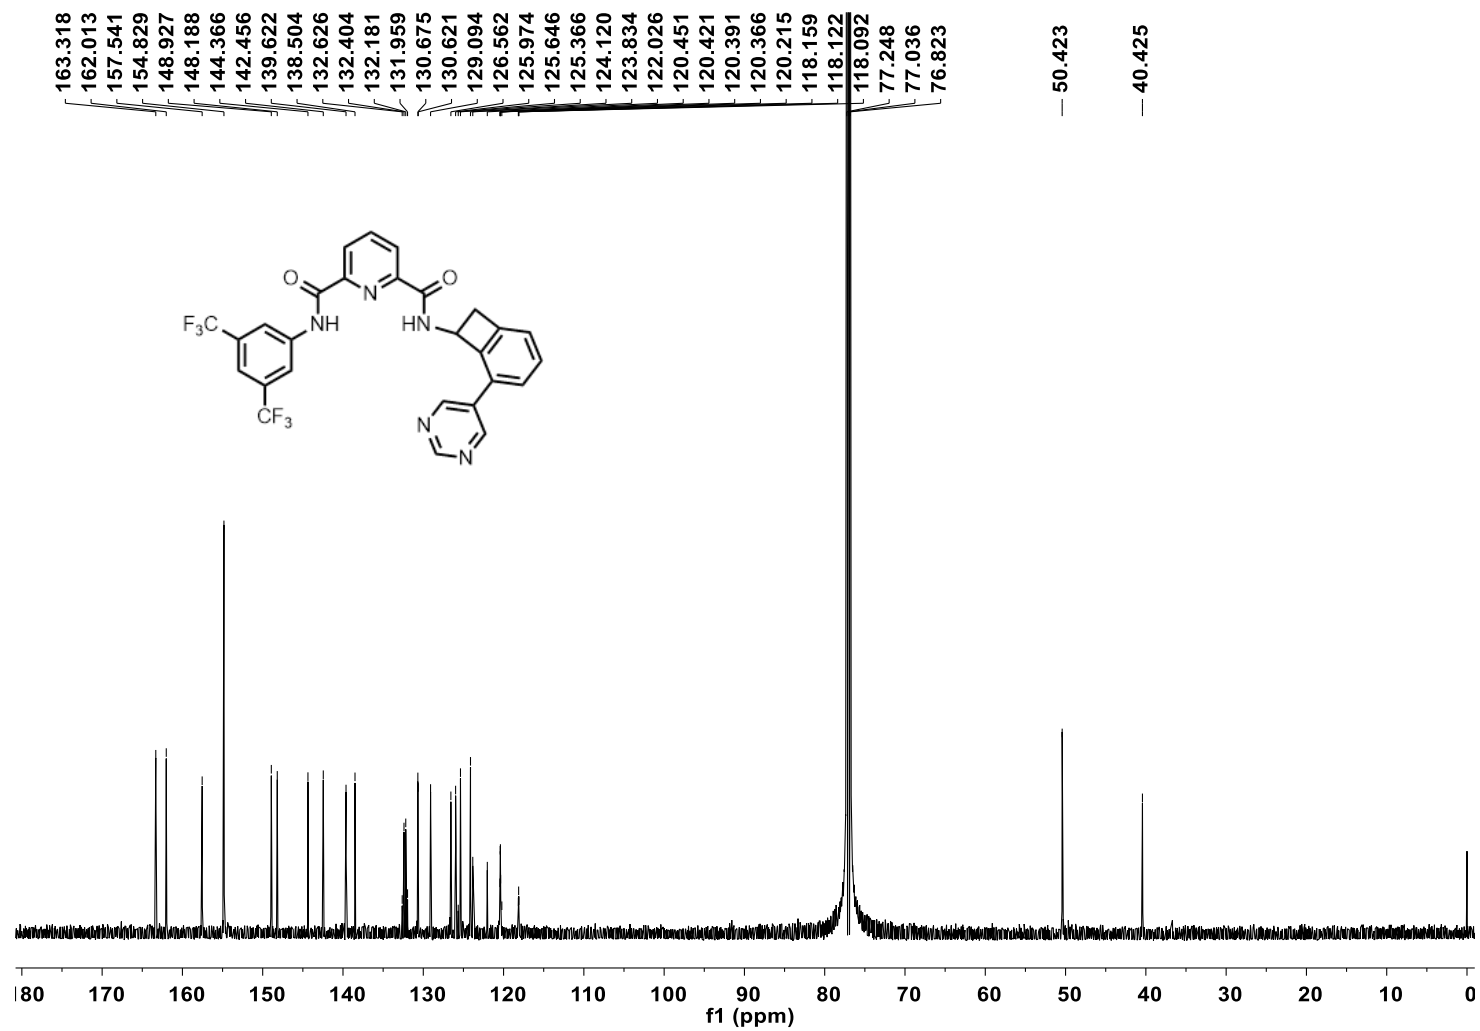

<sup>19</sup>F NMR (376 MHz, CDCl<sub>3</sub>) spectrum of **T18**

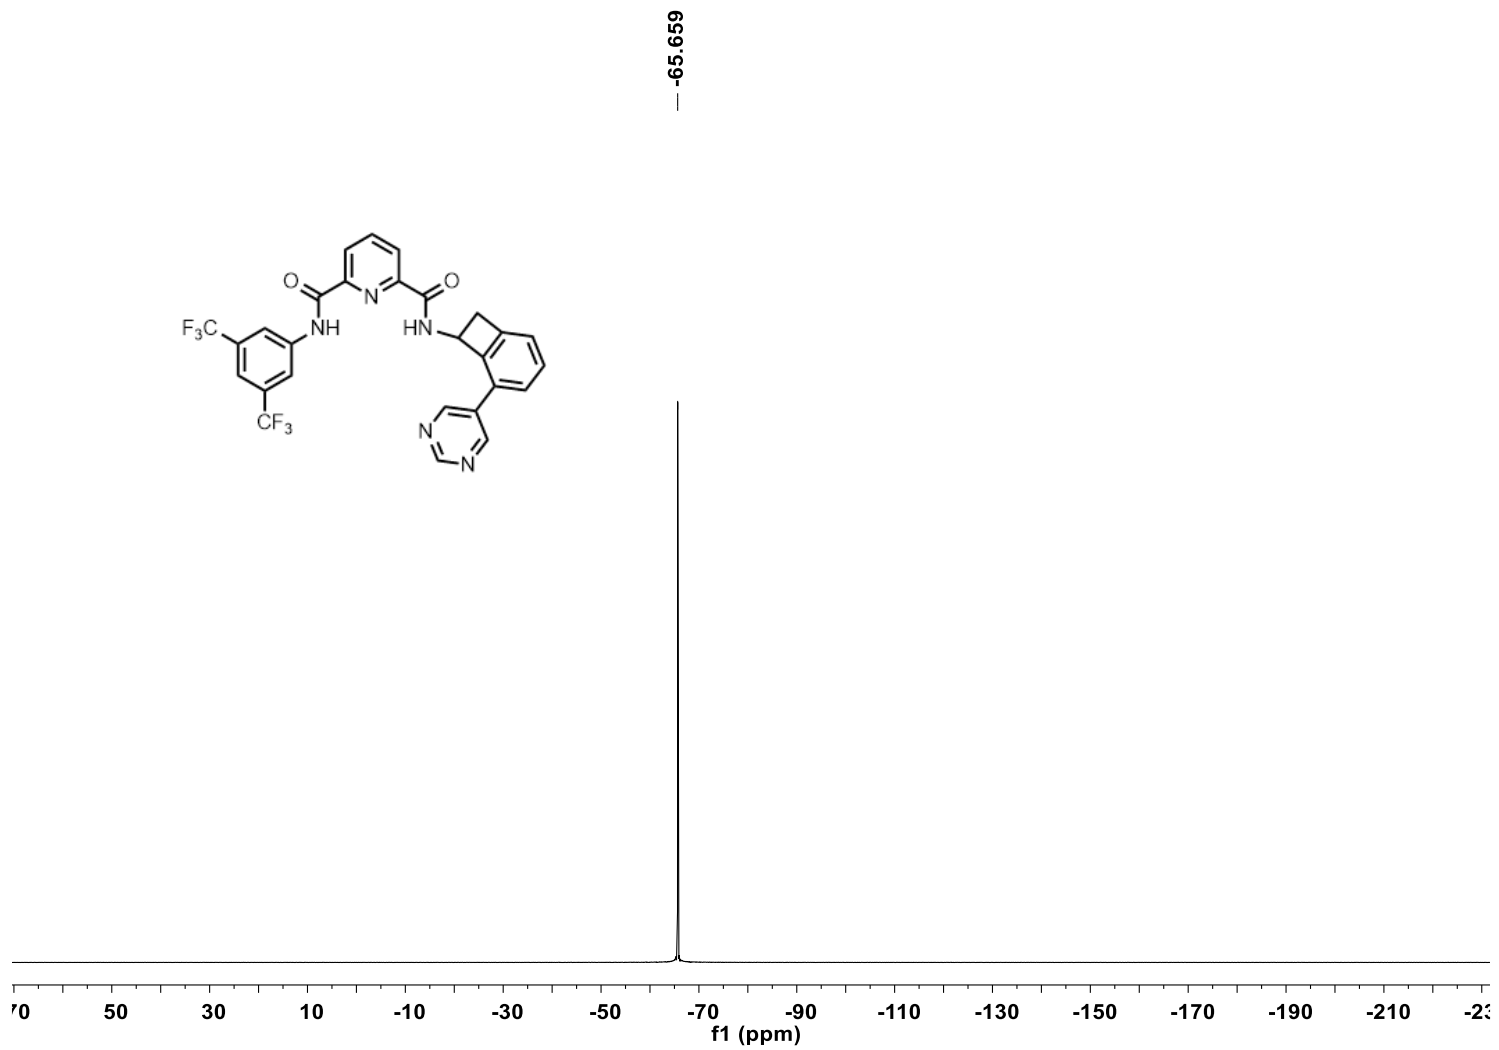

<sup>1</sup>H NMR (600 MHz, CDCl<sub>3</sub>) spectrum of T19

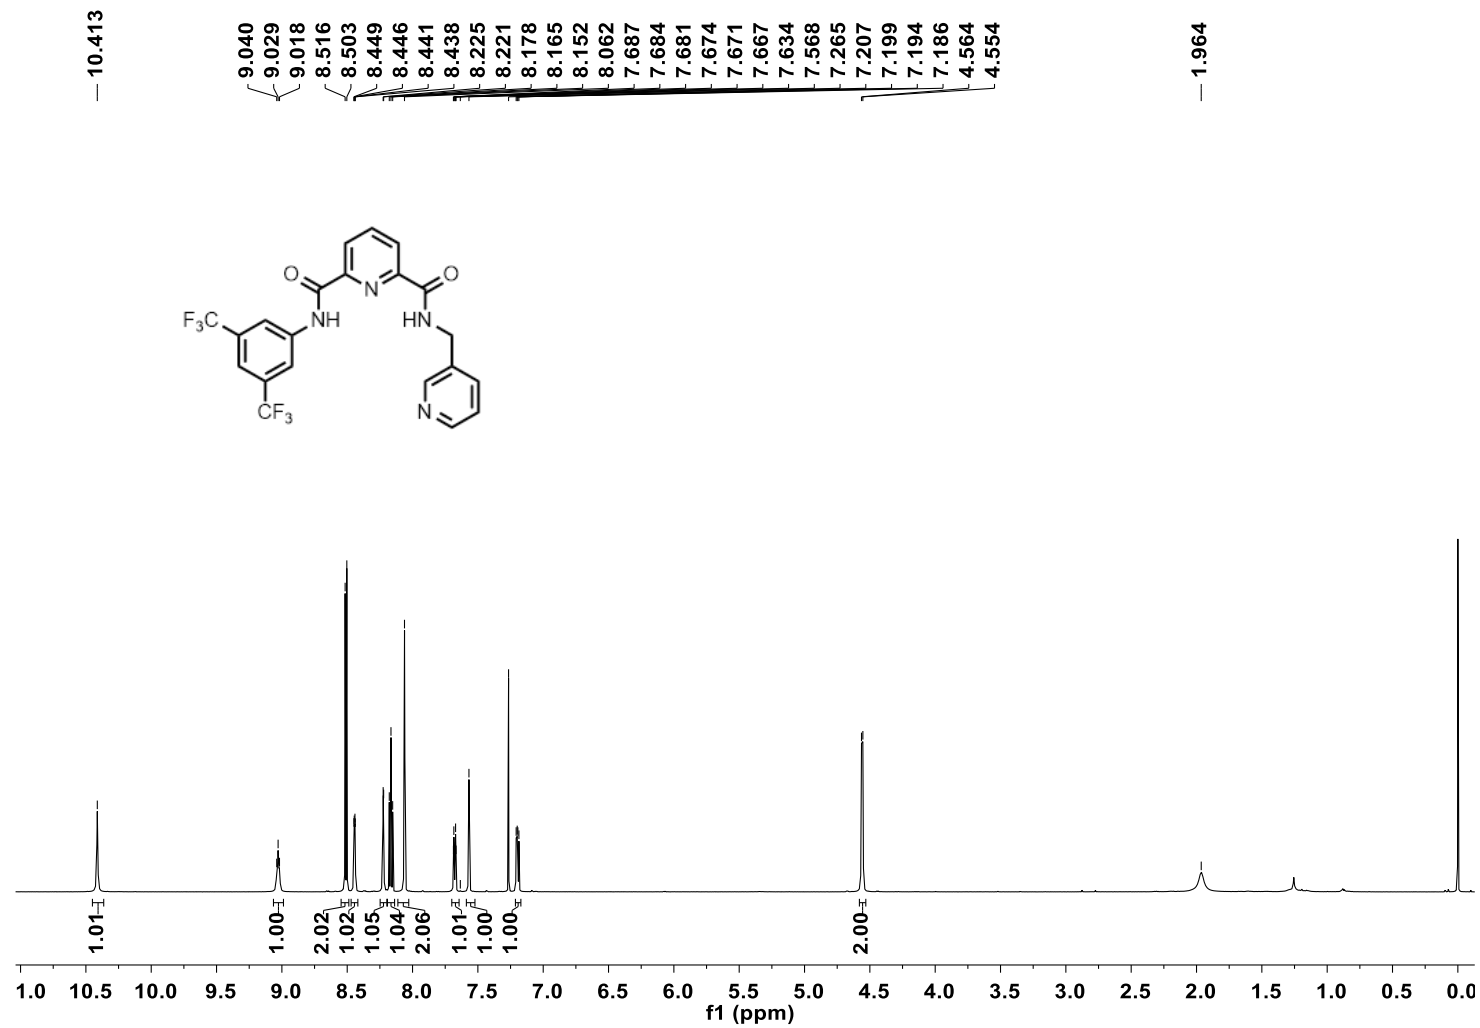

<sup>13</sup>C NMR (151 MHz, CDCl<sub>3</sub>) spectrum of T19

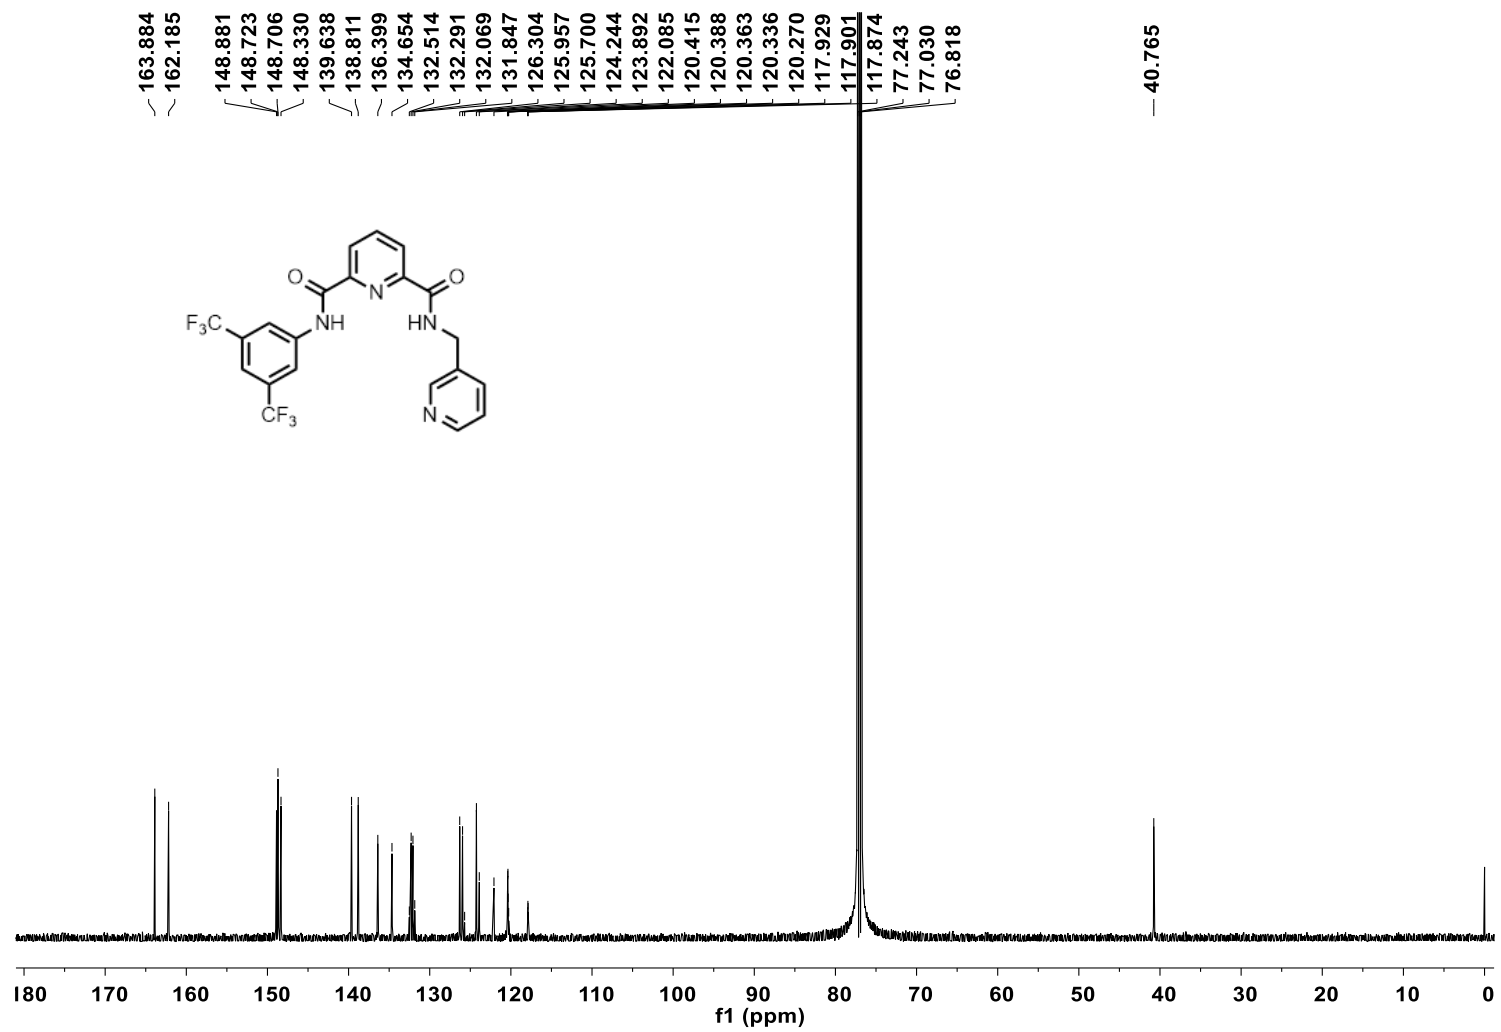

<sup>19</sup>F NMR (376 MHz, CDCl<sub>3</sub>) spectrum of **T19**

-65.654

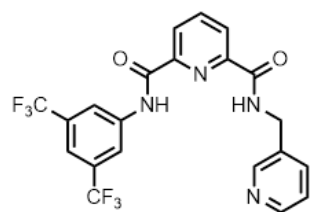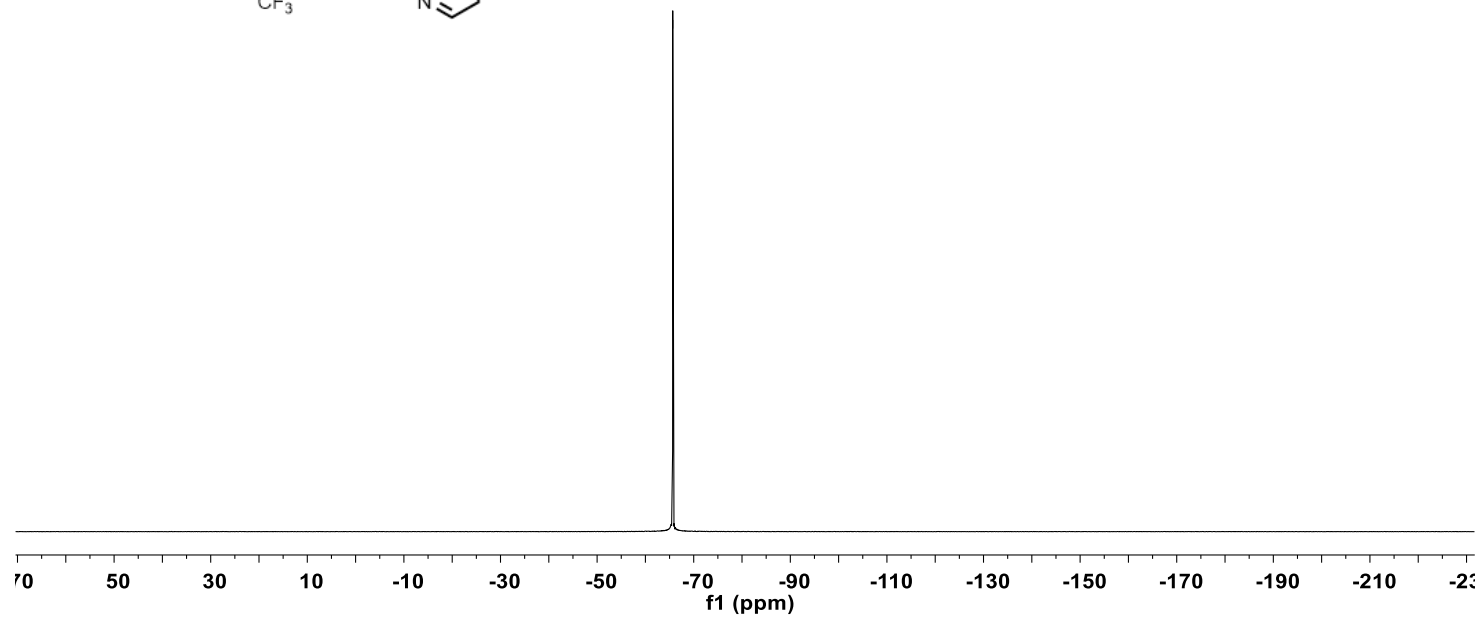

<sup>1</sup>H NMR (600 MHz, CDCl<sub>3</sub>) spectrum of T20

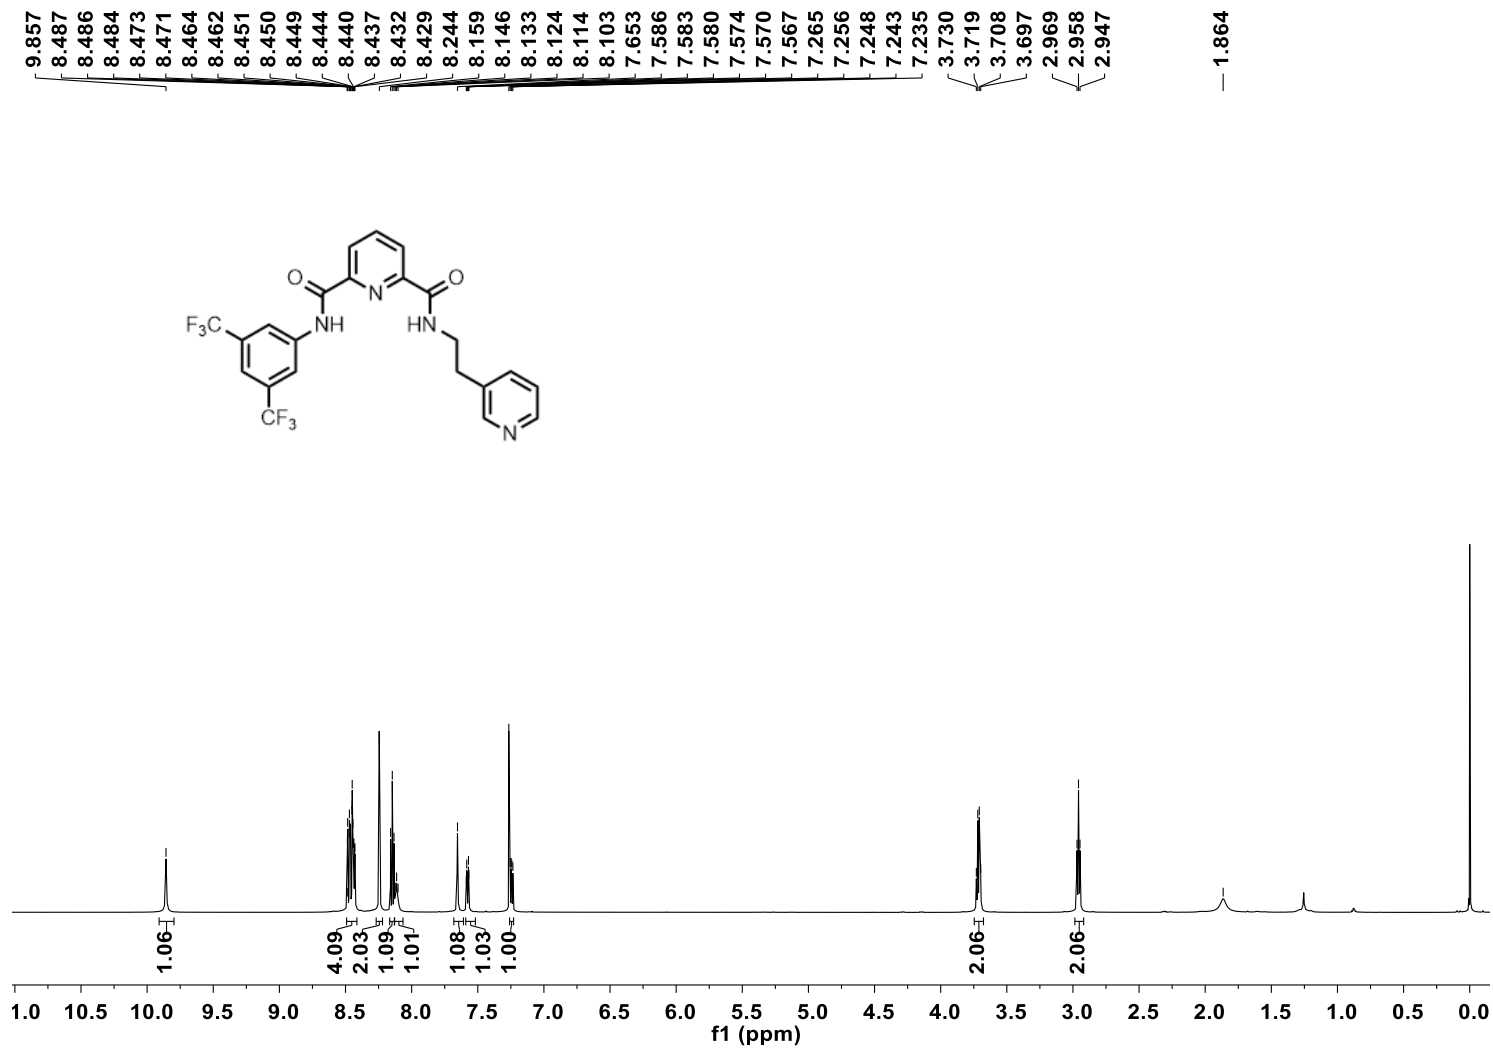

<sup>13</sup>C NMR (151 MHz, CDCl<sub>3</sub>) spectrum of T20

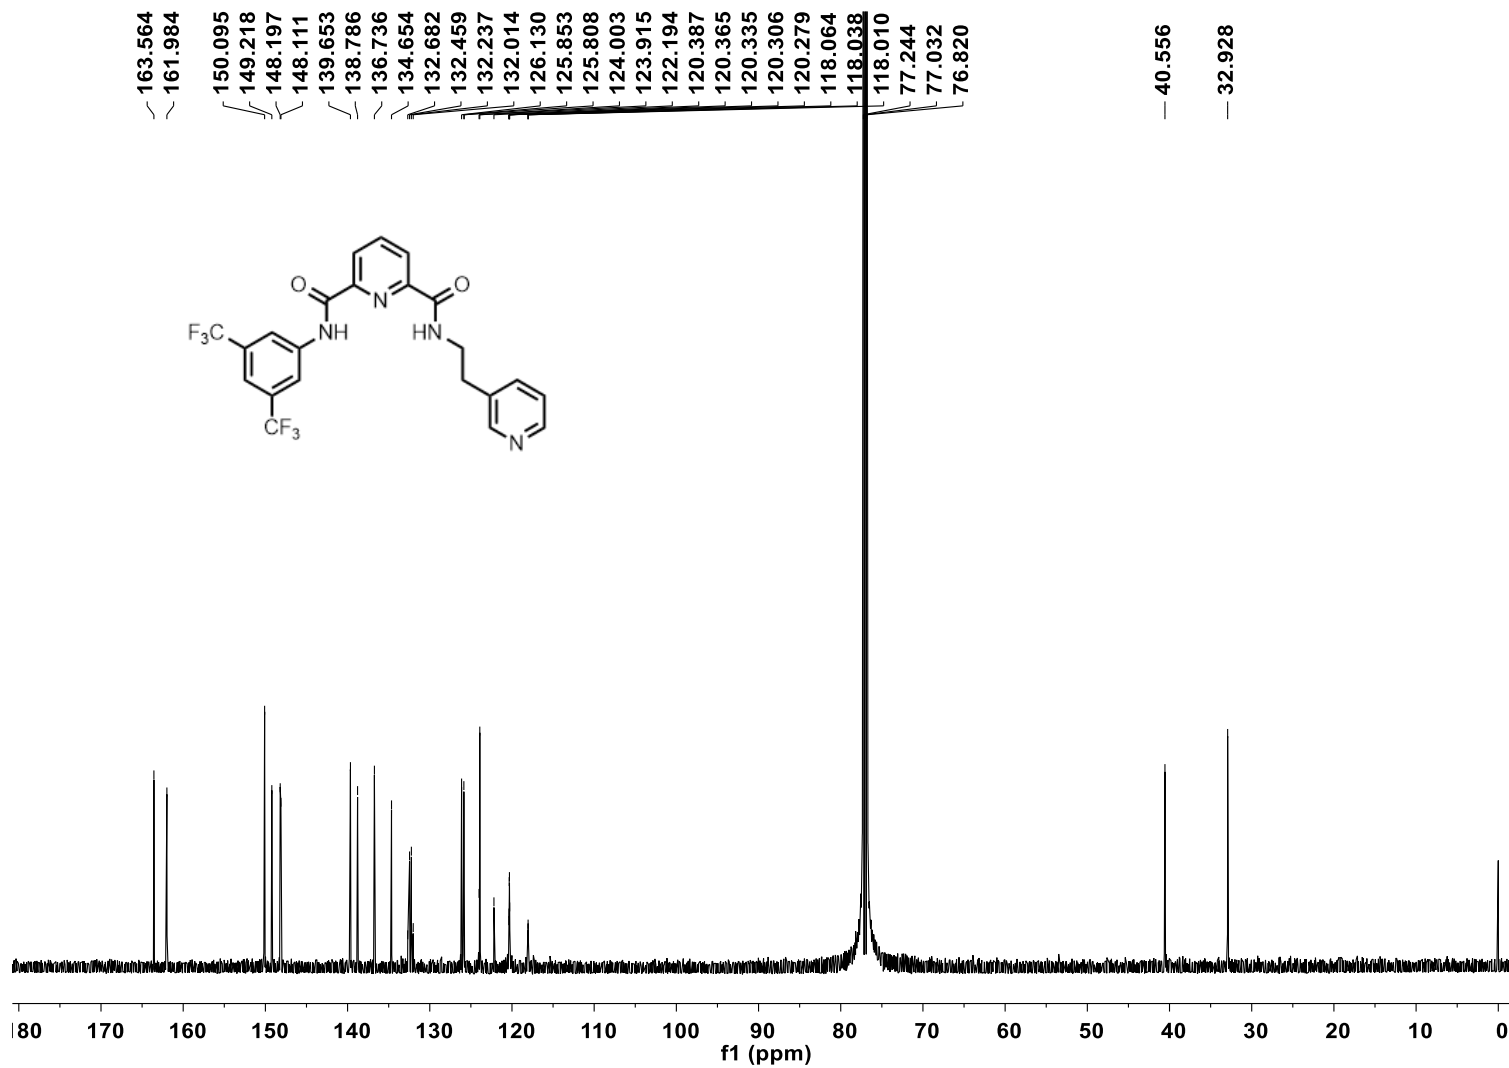

<sup>19</sup>F NMR (376 MHz, CDCl<sub>3</sub>) spectrum of T20

-65.515

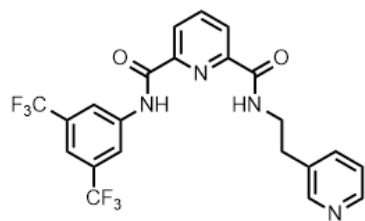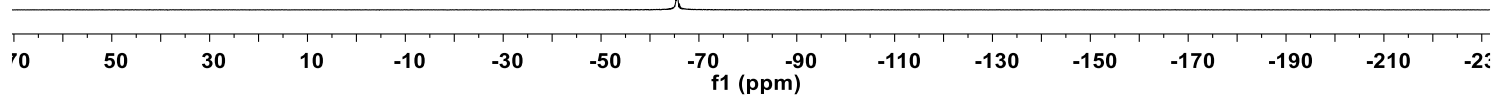



<sup>1</sup>H NMR (600 MHz, CDCl<sub>3</sub>) spectrum of T21

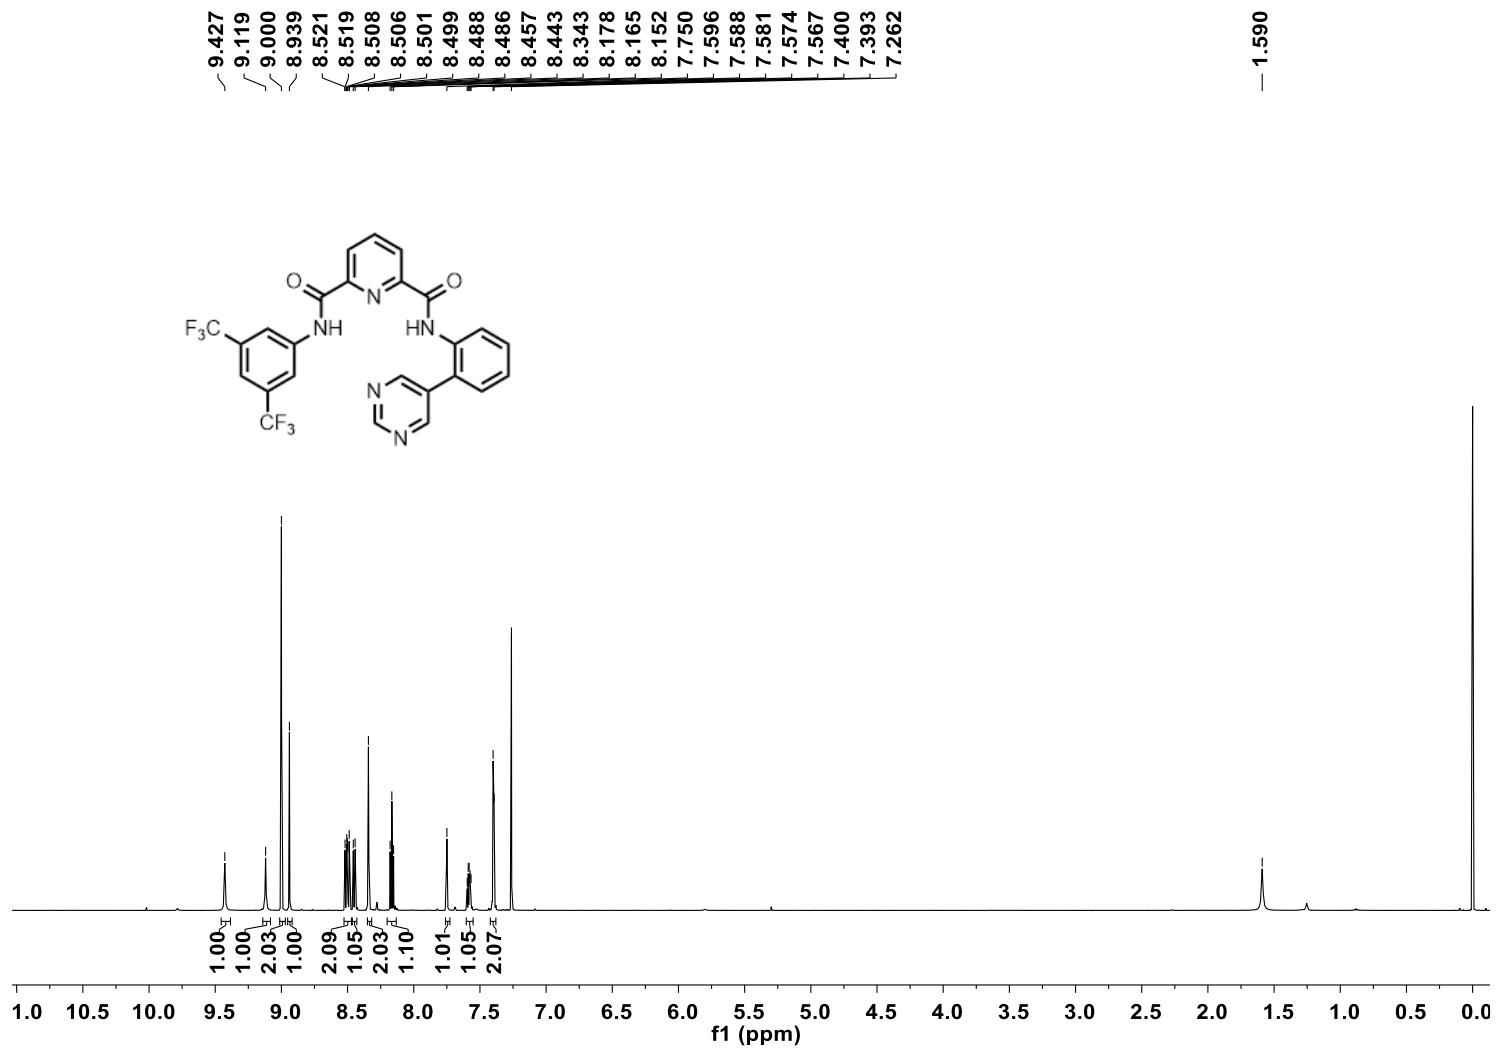

<sup>13</sup>C NMR (151 MHz, CDCl<sub>3</sub>) spectrum of T21

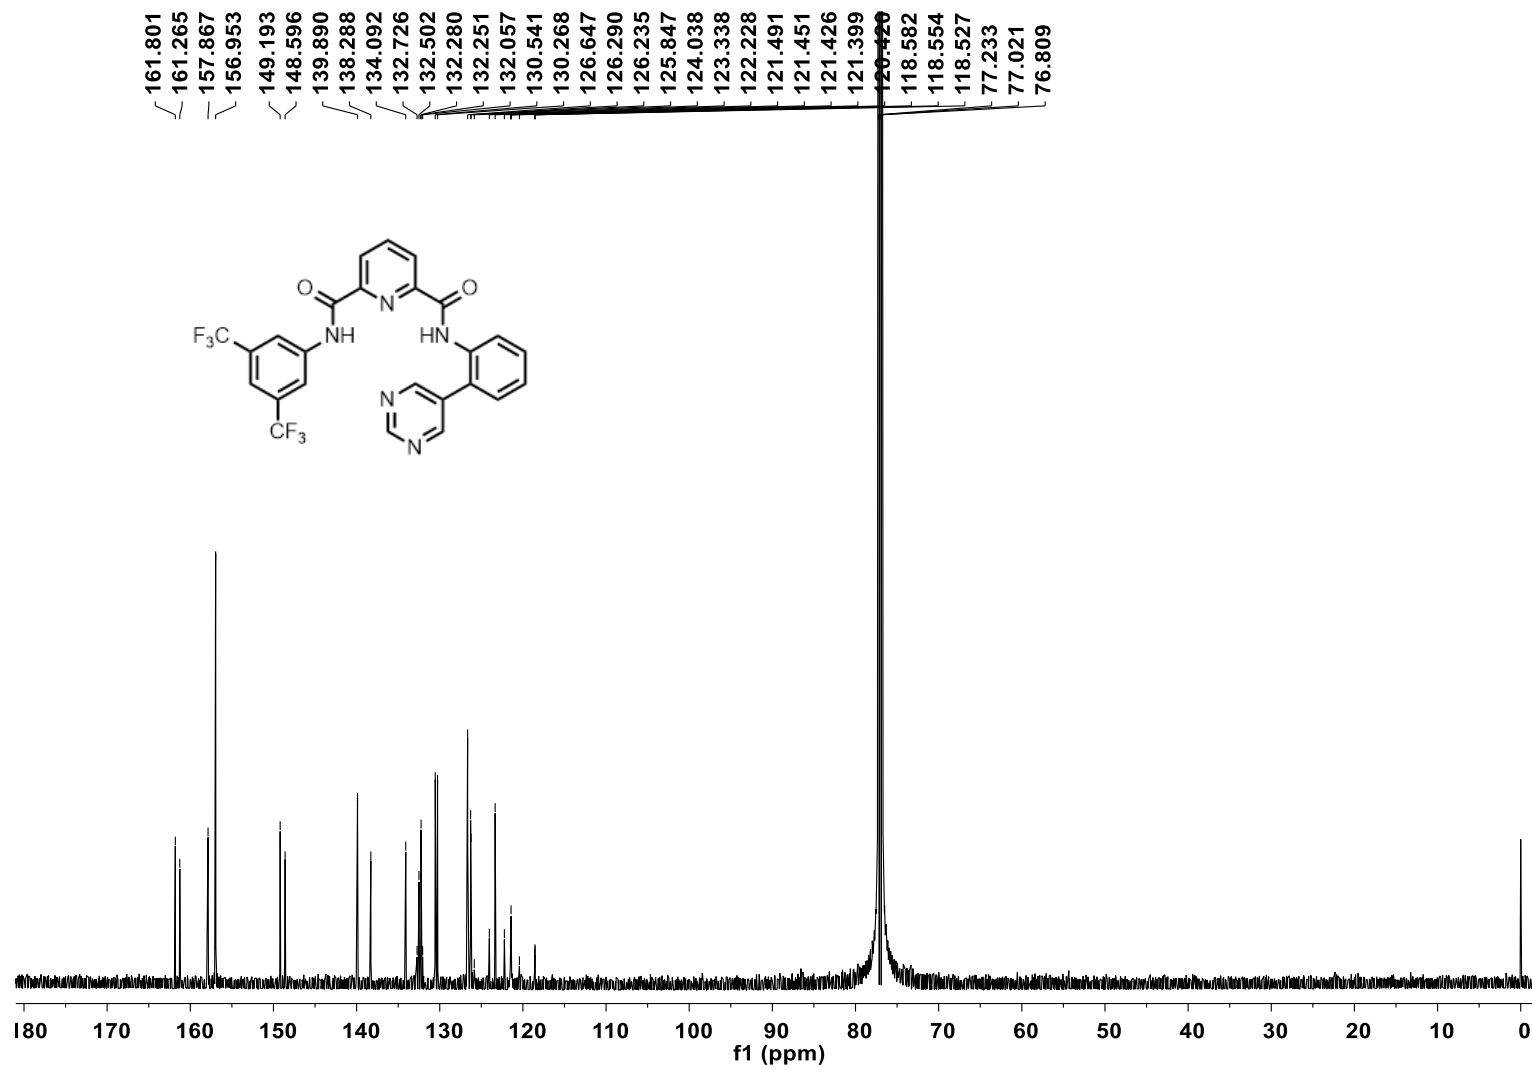

$^{19}\text{F}$  NMR (376 MHz,  $\text{CDCl}_3$ ) spectrum of **T21**

-65.515

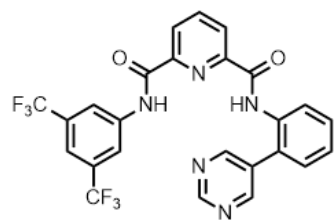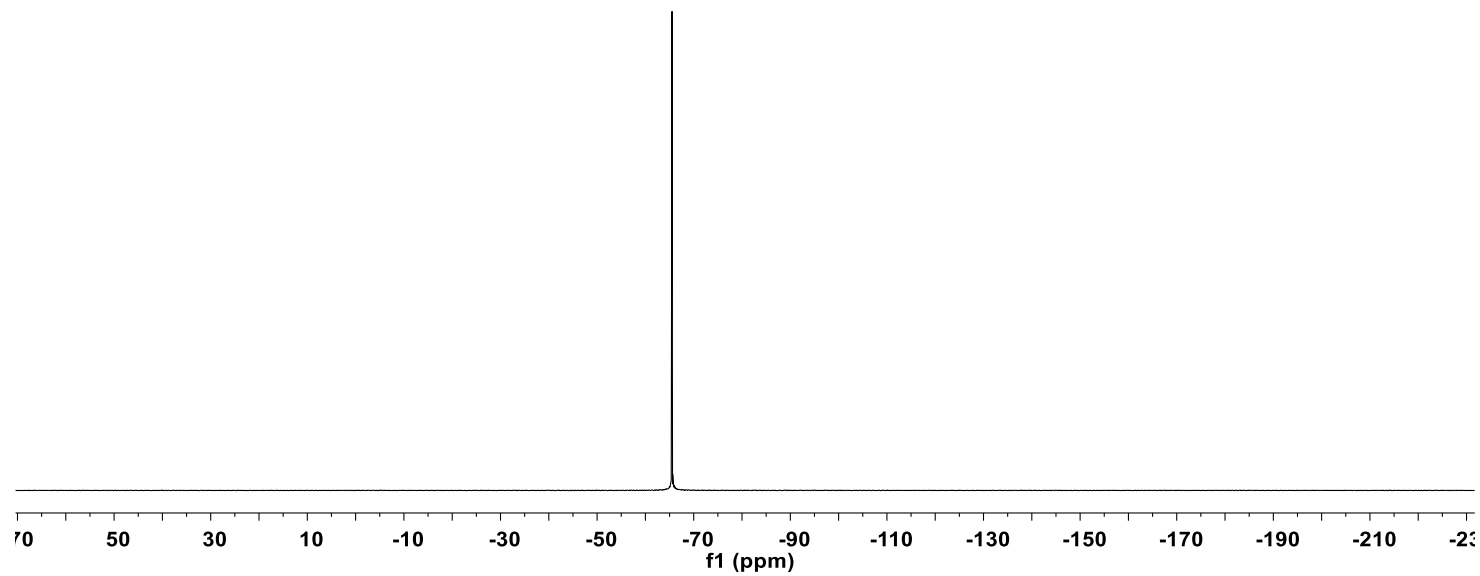

<sup>1</sup>H NMR (600 MHz, CDCl<sub>3</sub>) spectrum of *cis*-T22

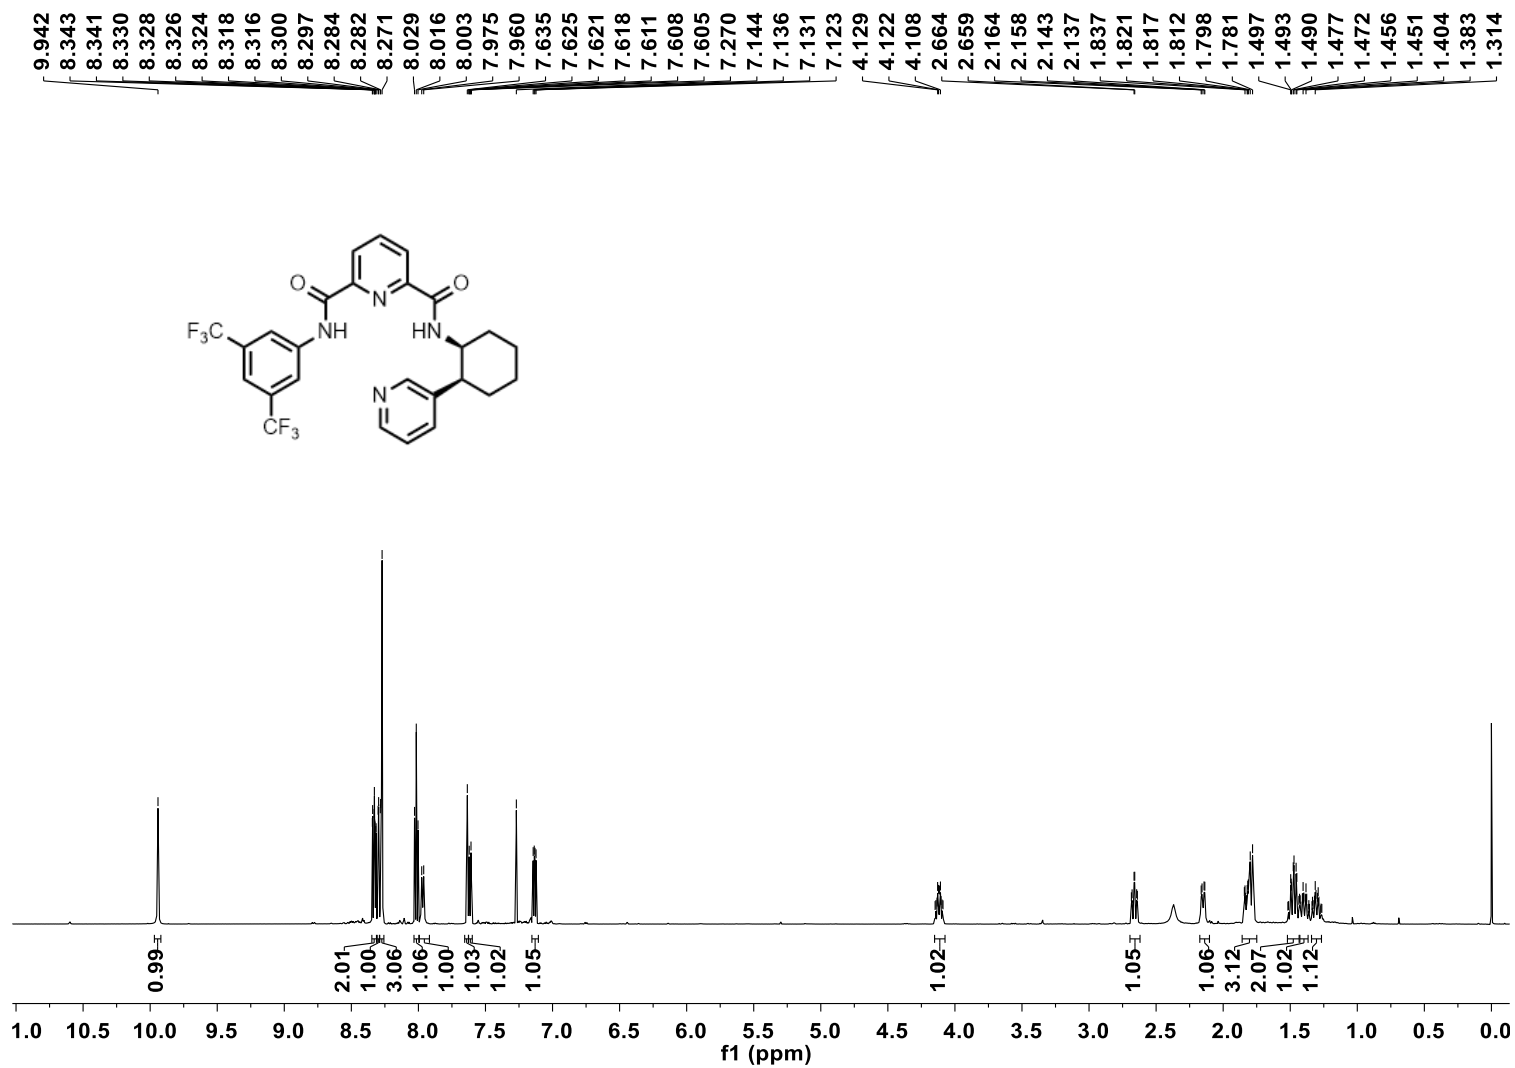

<sup>13</sup>C NMR (151 MHz, CDCl<sub>3</sub>) spectrum of *cis*-T22

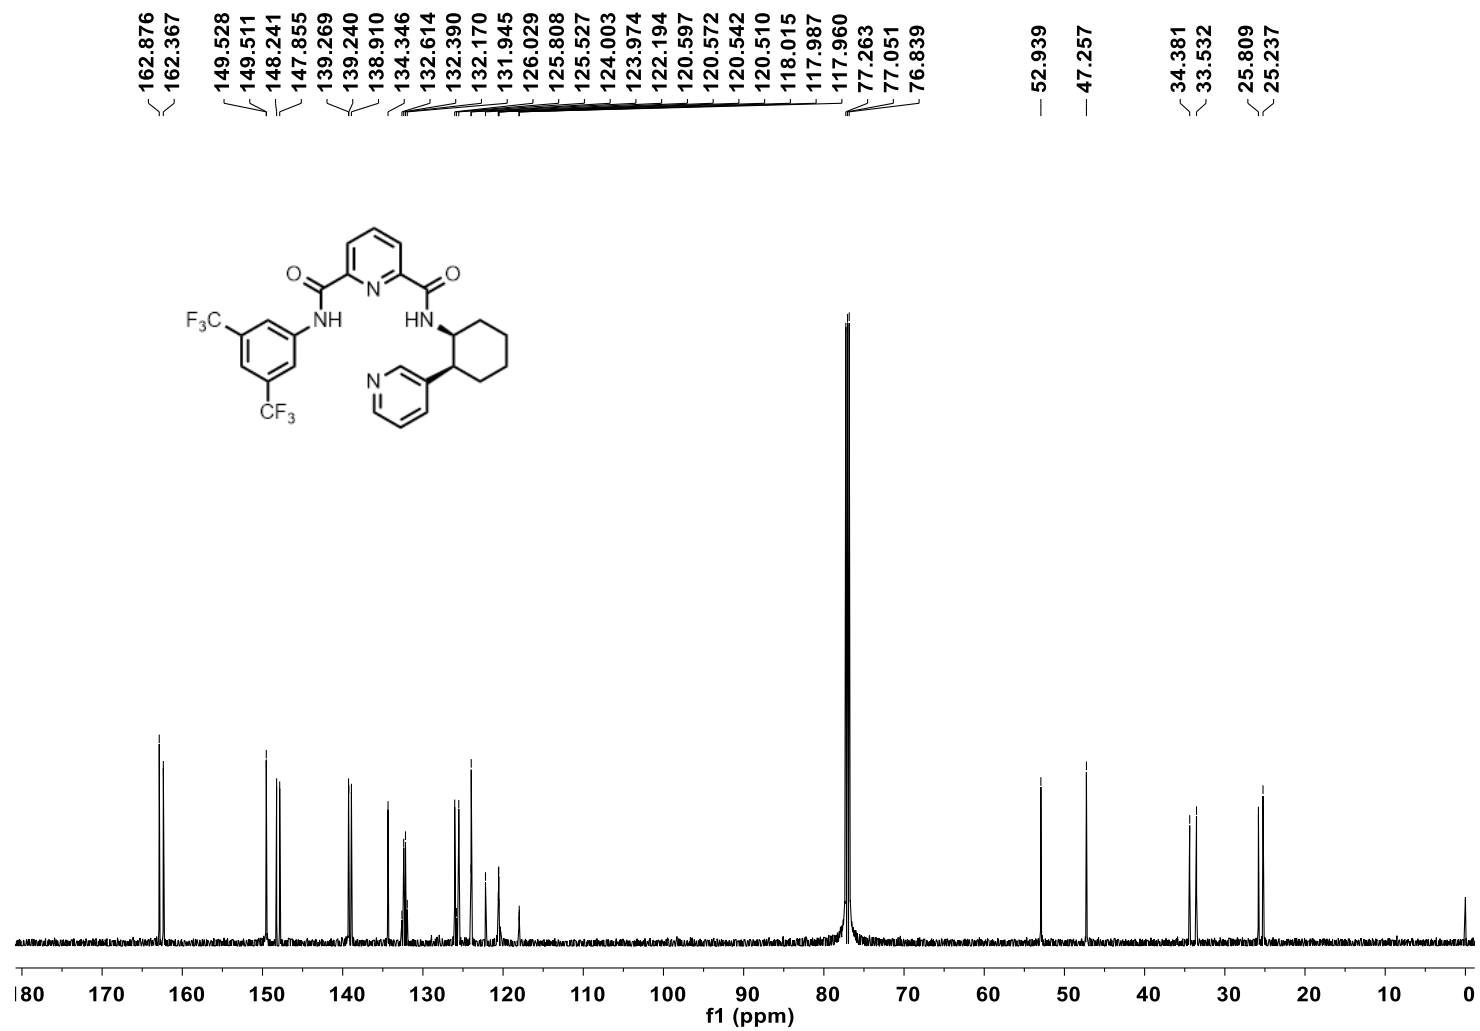

$^{19}\text{F}$  NMR (376 MHz,  $\text{CDCl}_3$ ) spectrum of *cis*-T22

-65.566

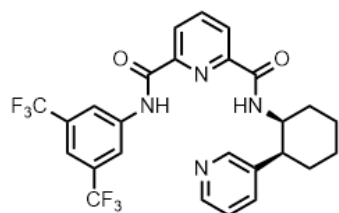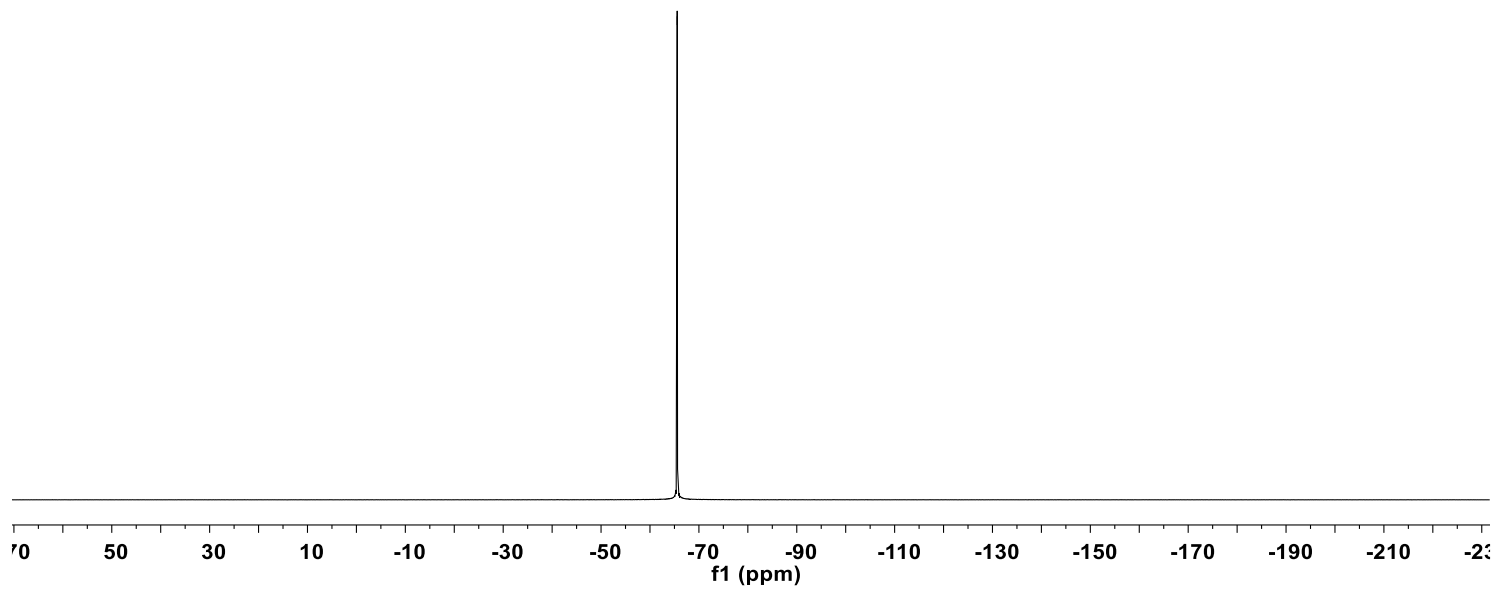

<sup>1</sup>H NMR (600 MHz, CDCl<sub>3</sub>) spectrum of *trans*-T22

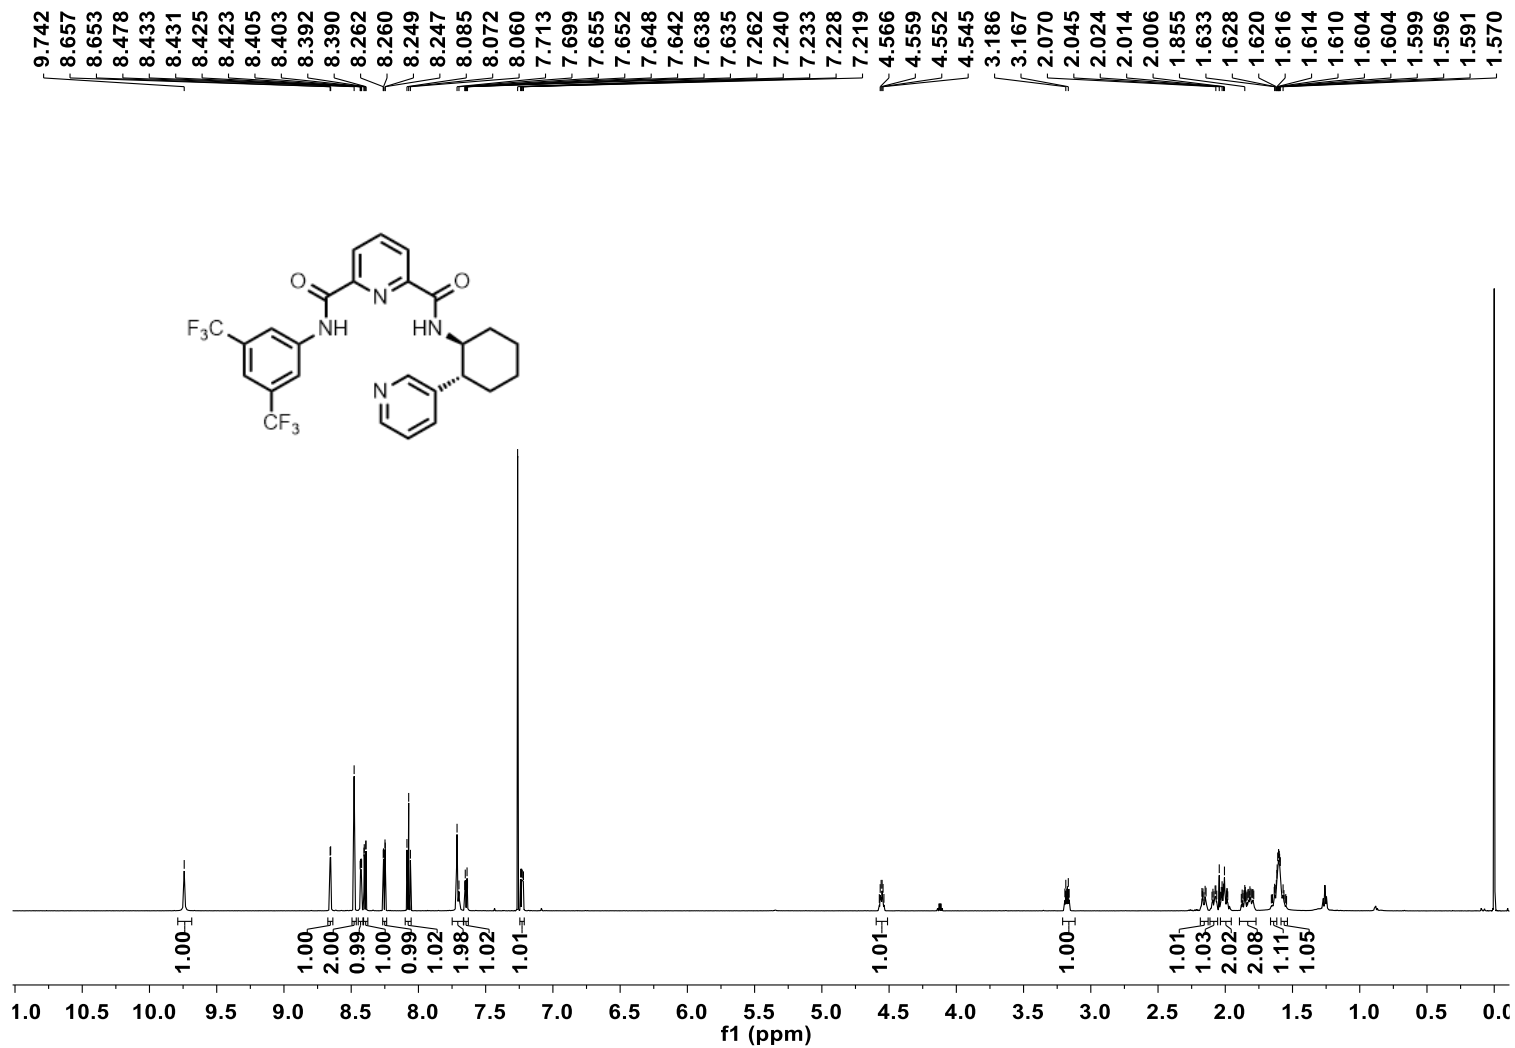

<sup>13</sup>C NMR (151 MHz, CDCl<sub>3</sub>) spectrum of *trans*-T22

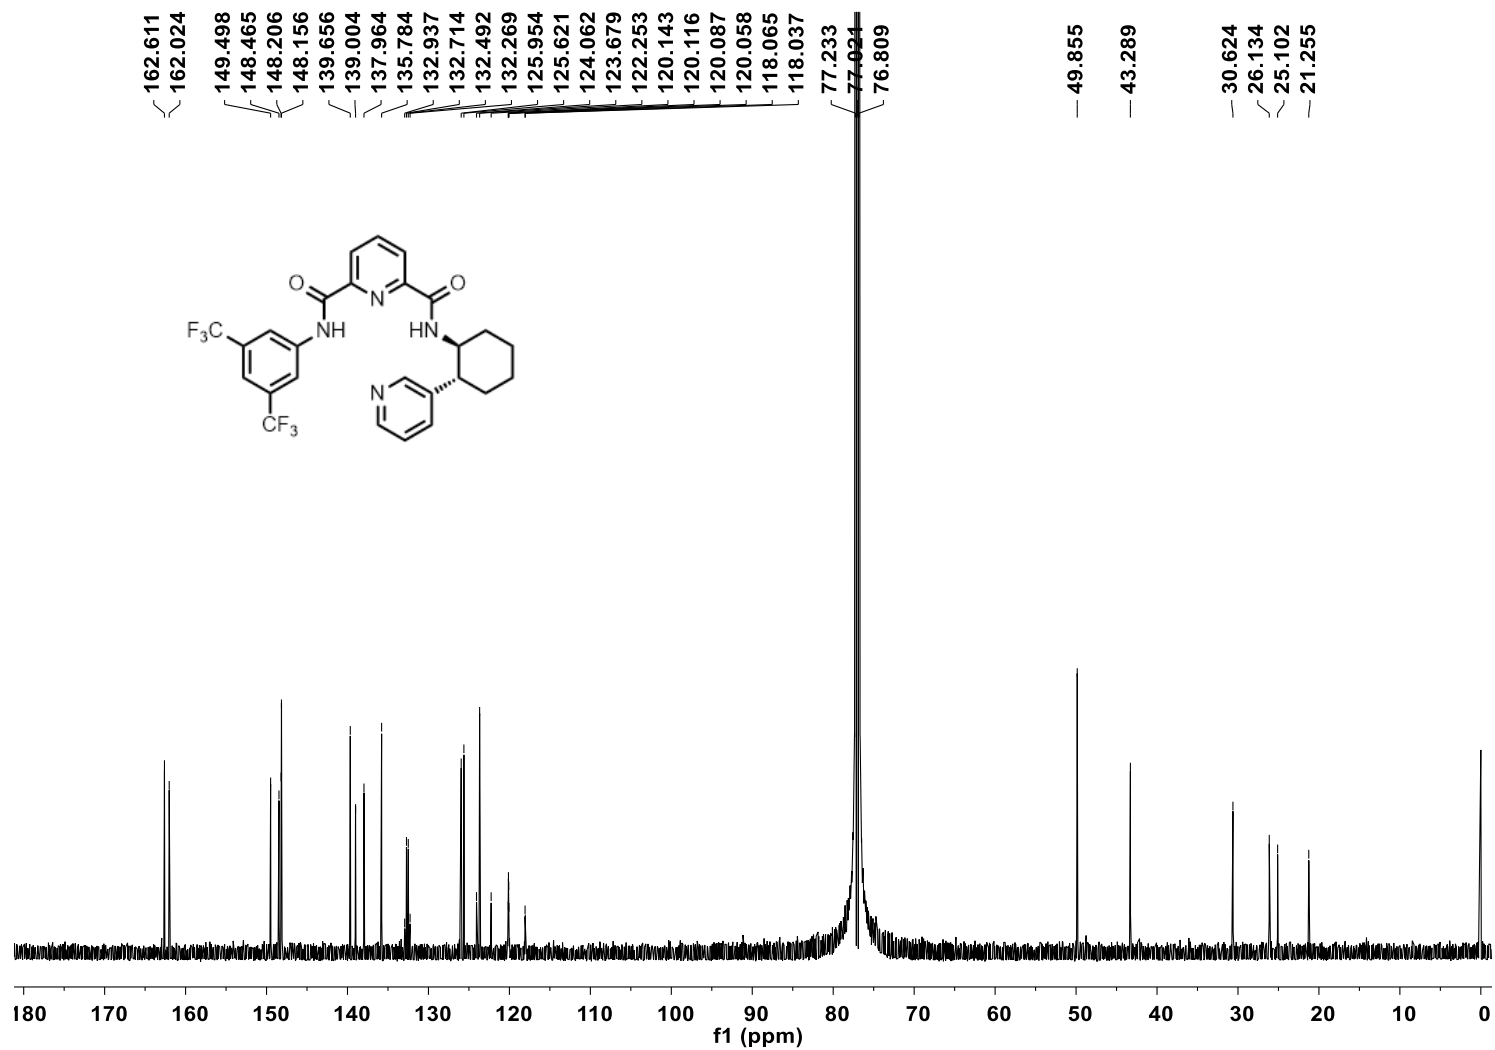



$^{19}\text{F}$  NMR (376 MHz,  $\text{CDCl}_3$ ) spectrum of *trans*-T22

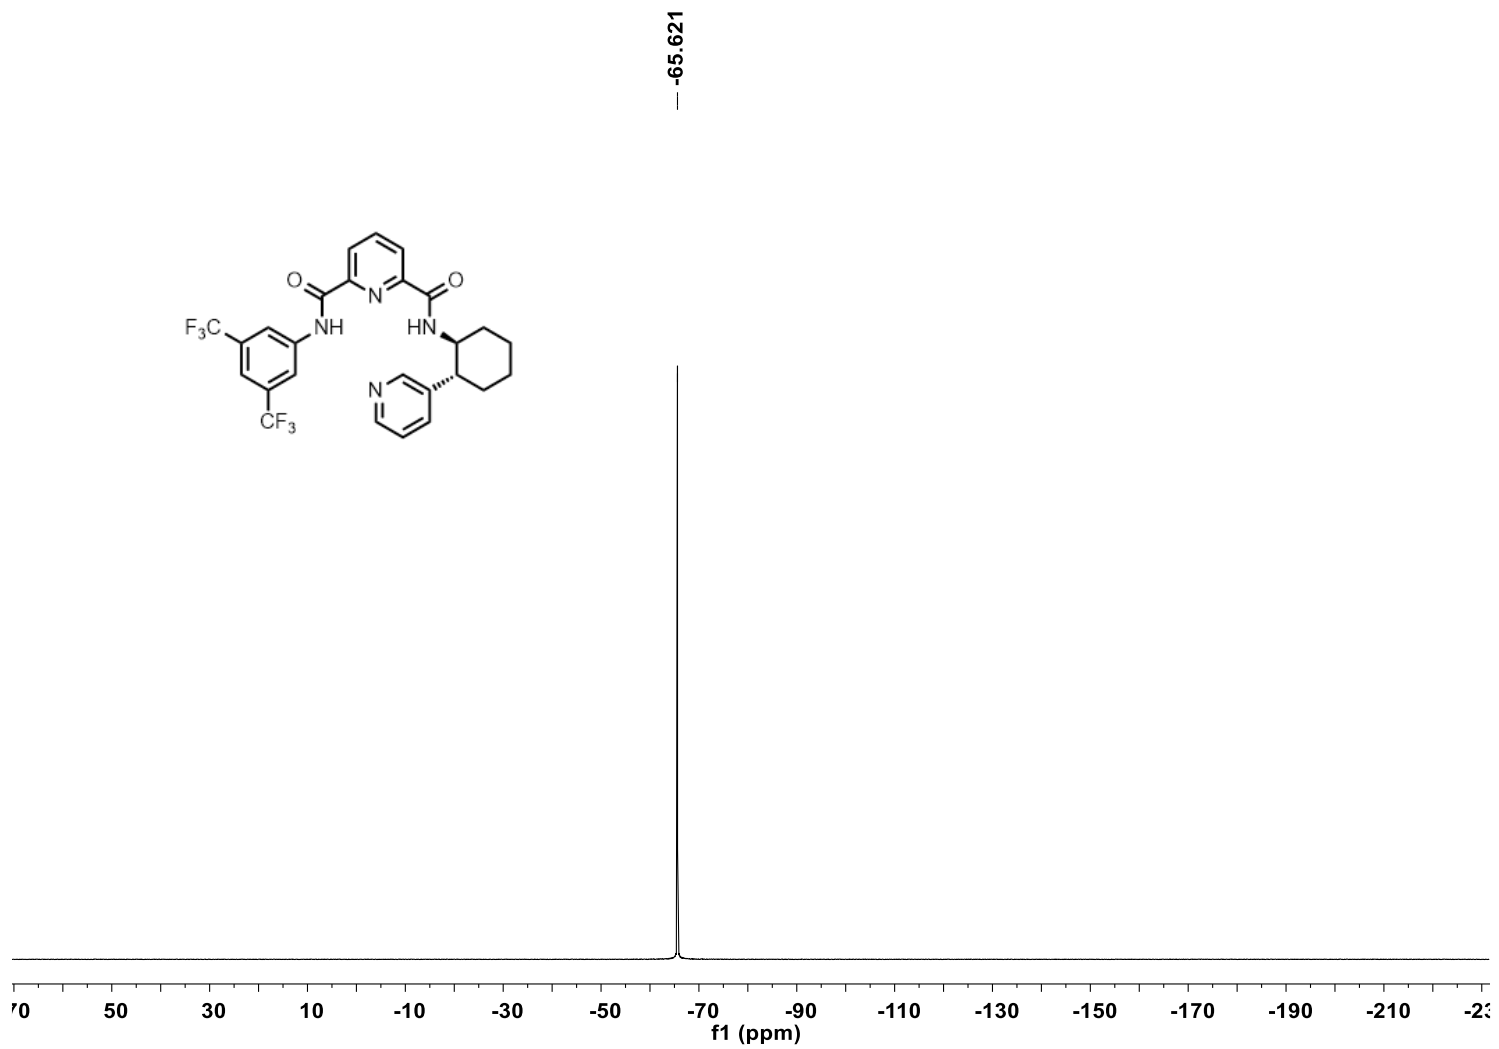

<sup>1</sup>H NMR (600 MHz, CDCl<sub>3</sub>) spectrum of T23

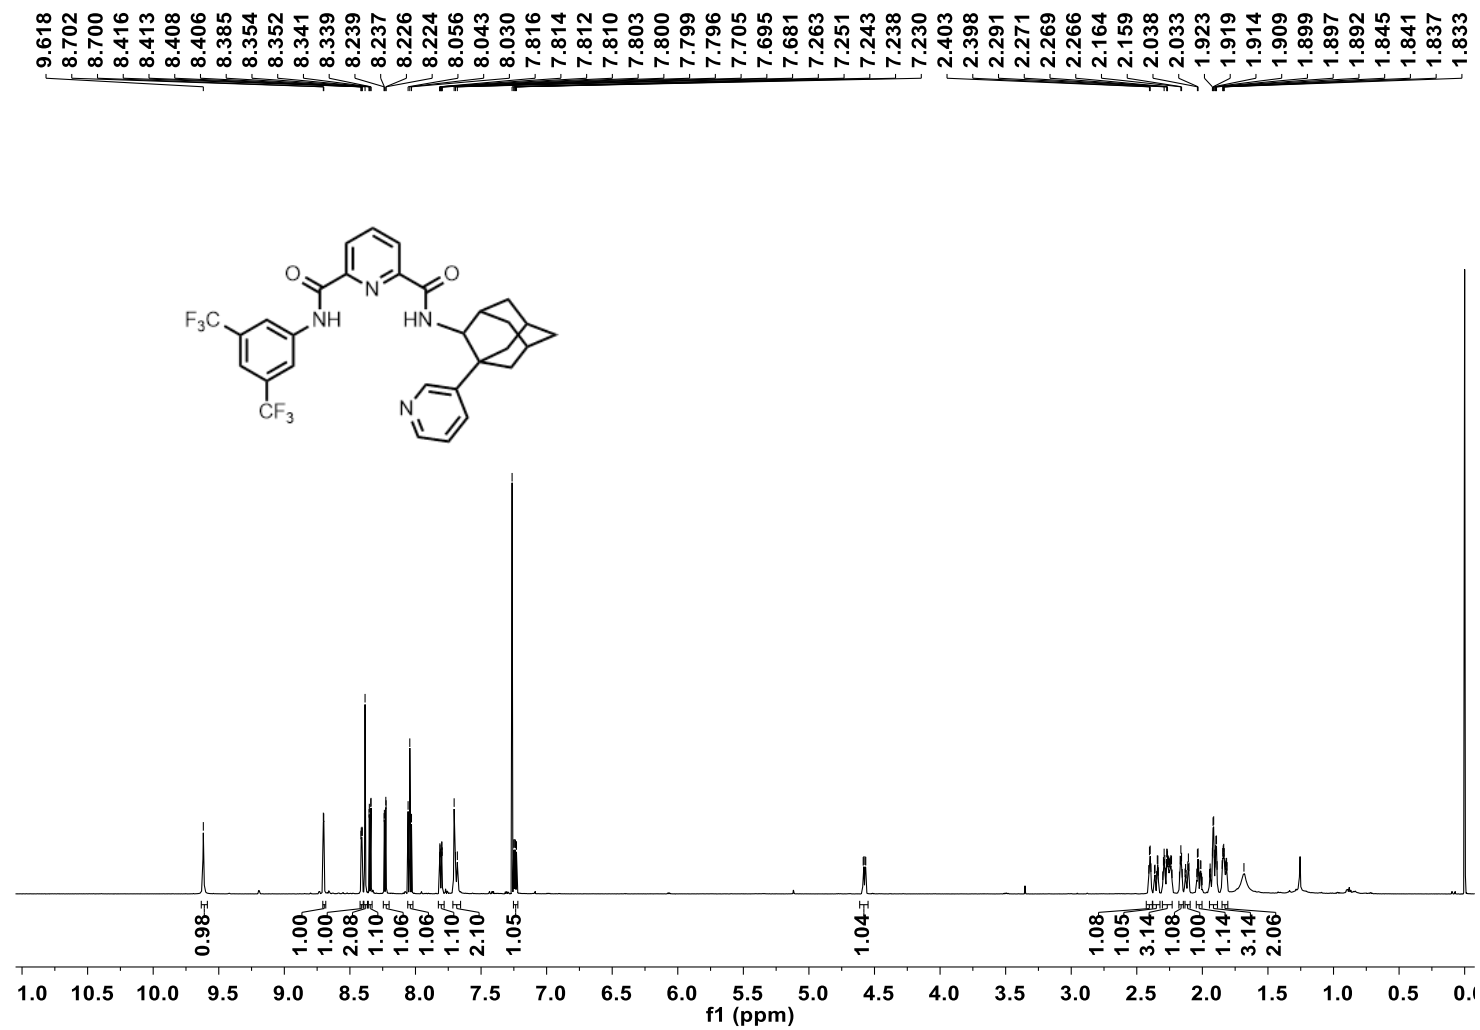

<sup>13</sup>C NMR (151 MHz, CDCl<sub>3</sub>) spectrum of T23

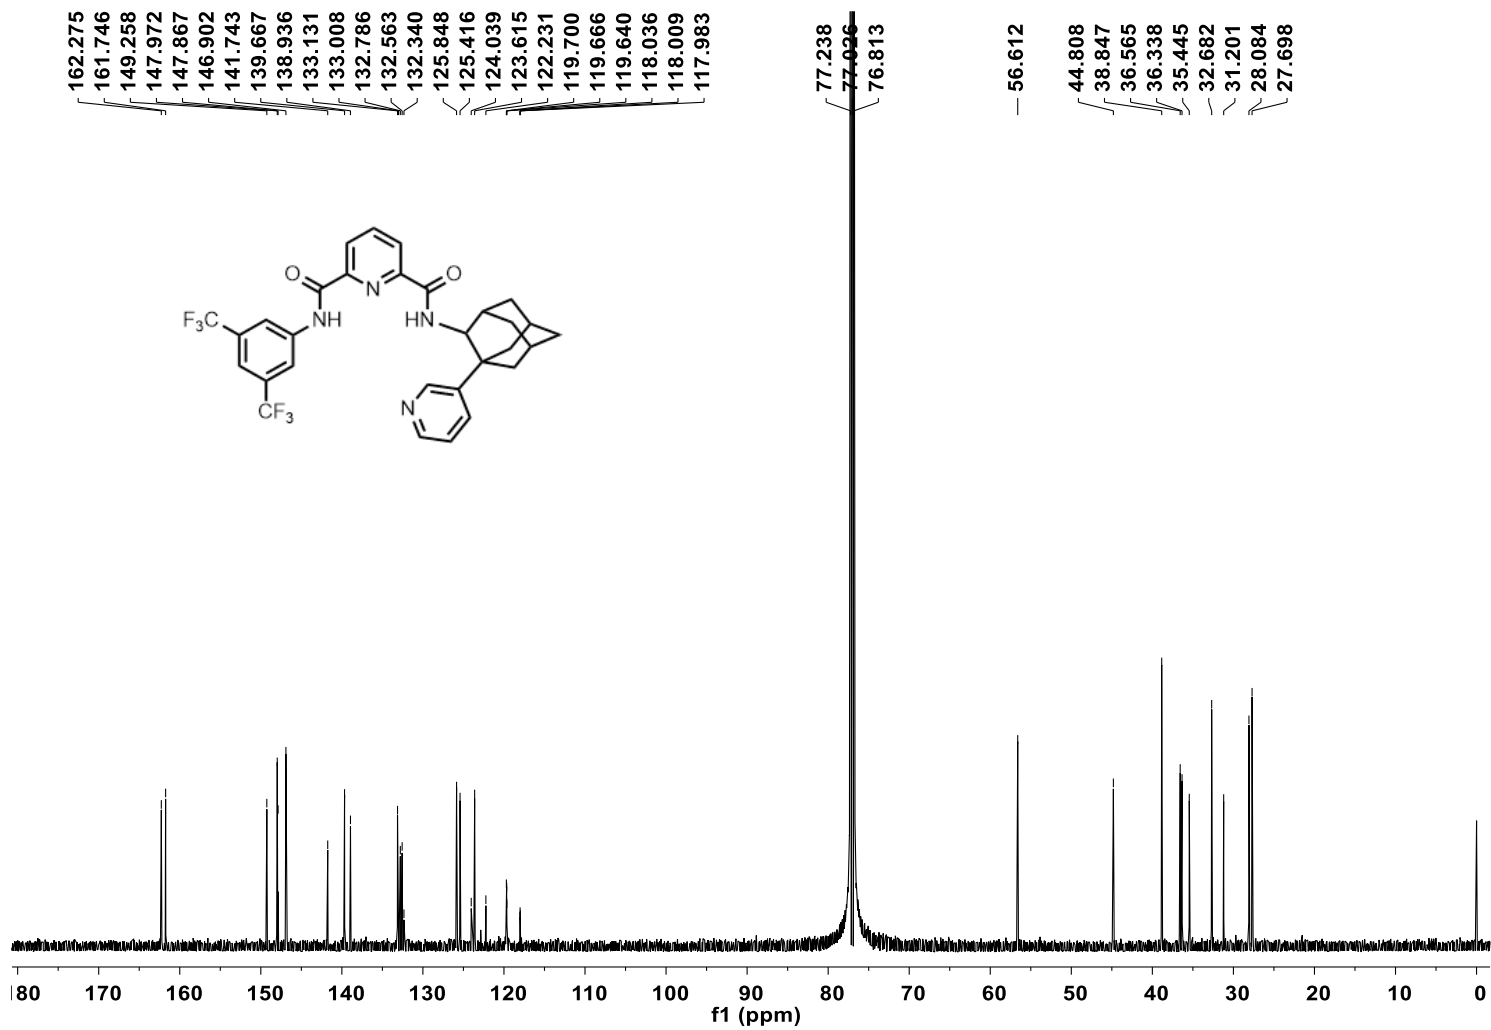

$^{19}\text{F}$  NMR (376 MHz,  $\text{CDCl}_3$ ) spectrum of **T23**

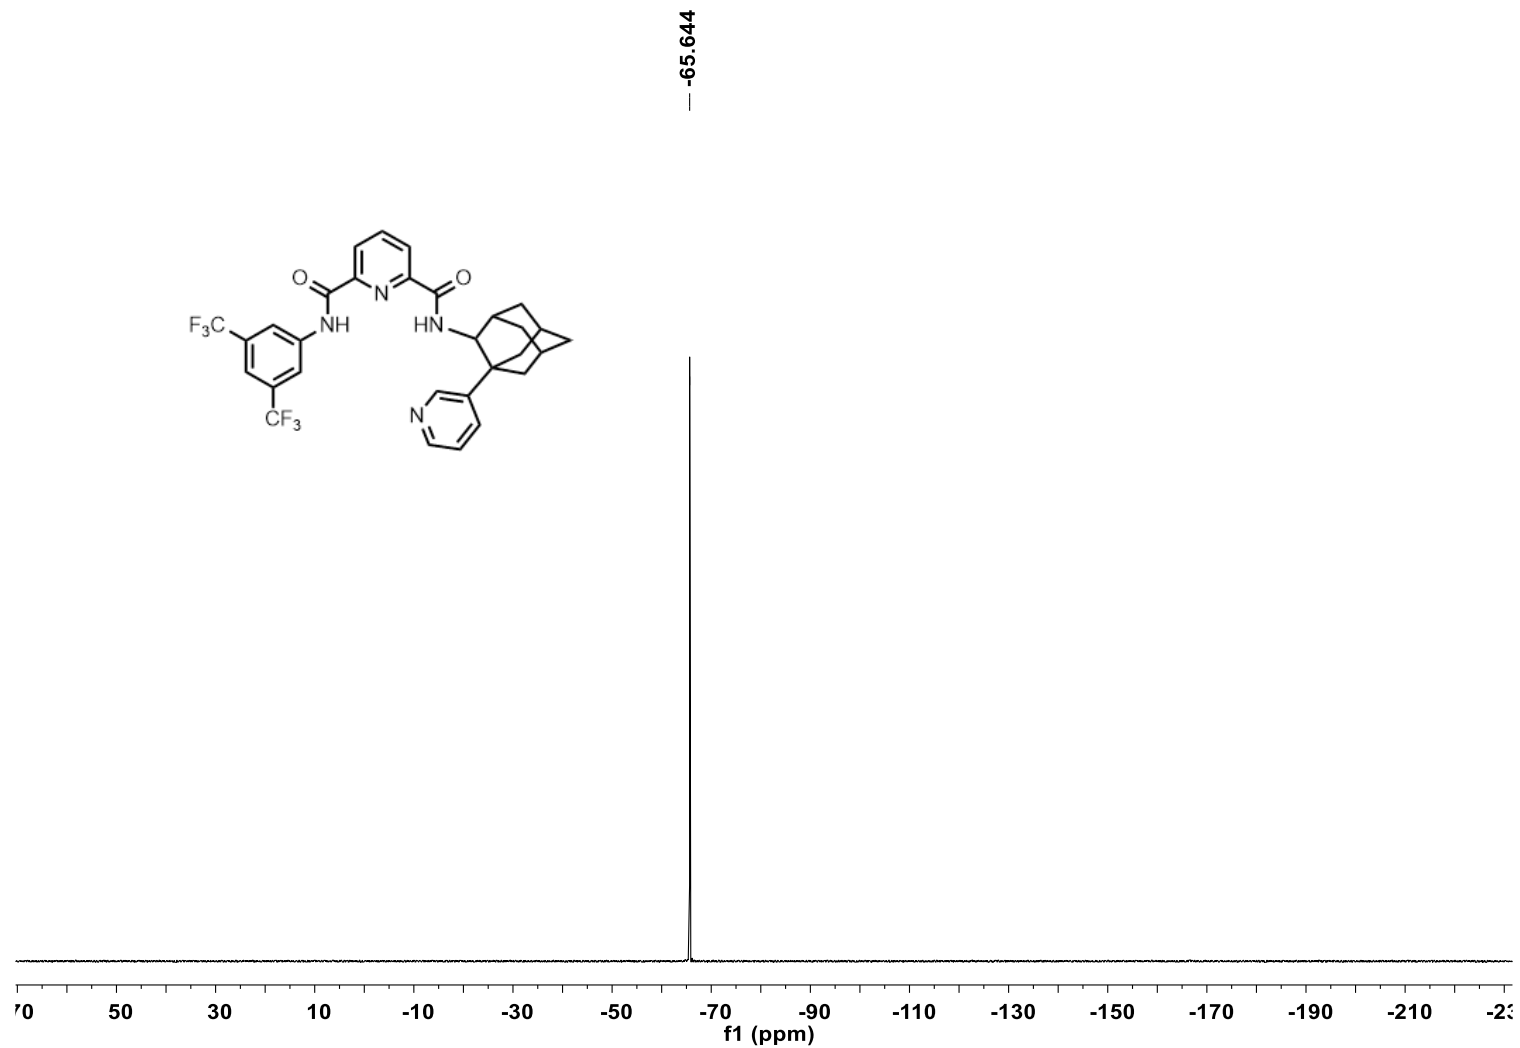

<sup>1</sup>H NMR (600 MHz, CDCl<sub>3</sub>) spectrum of *cis*-T24

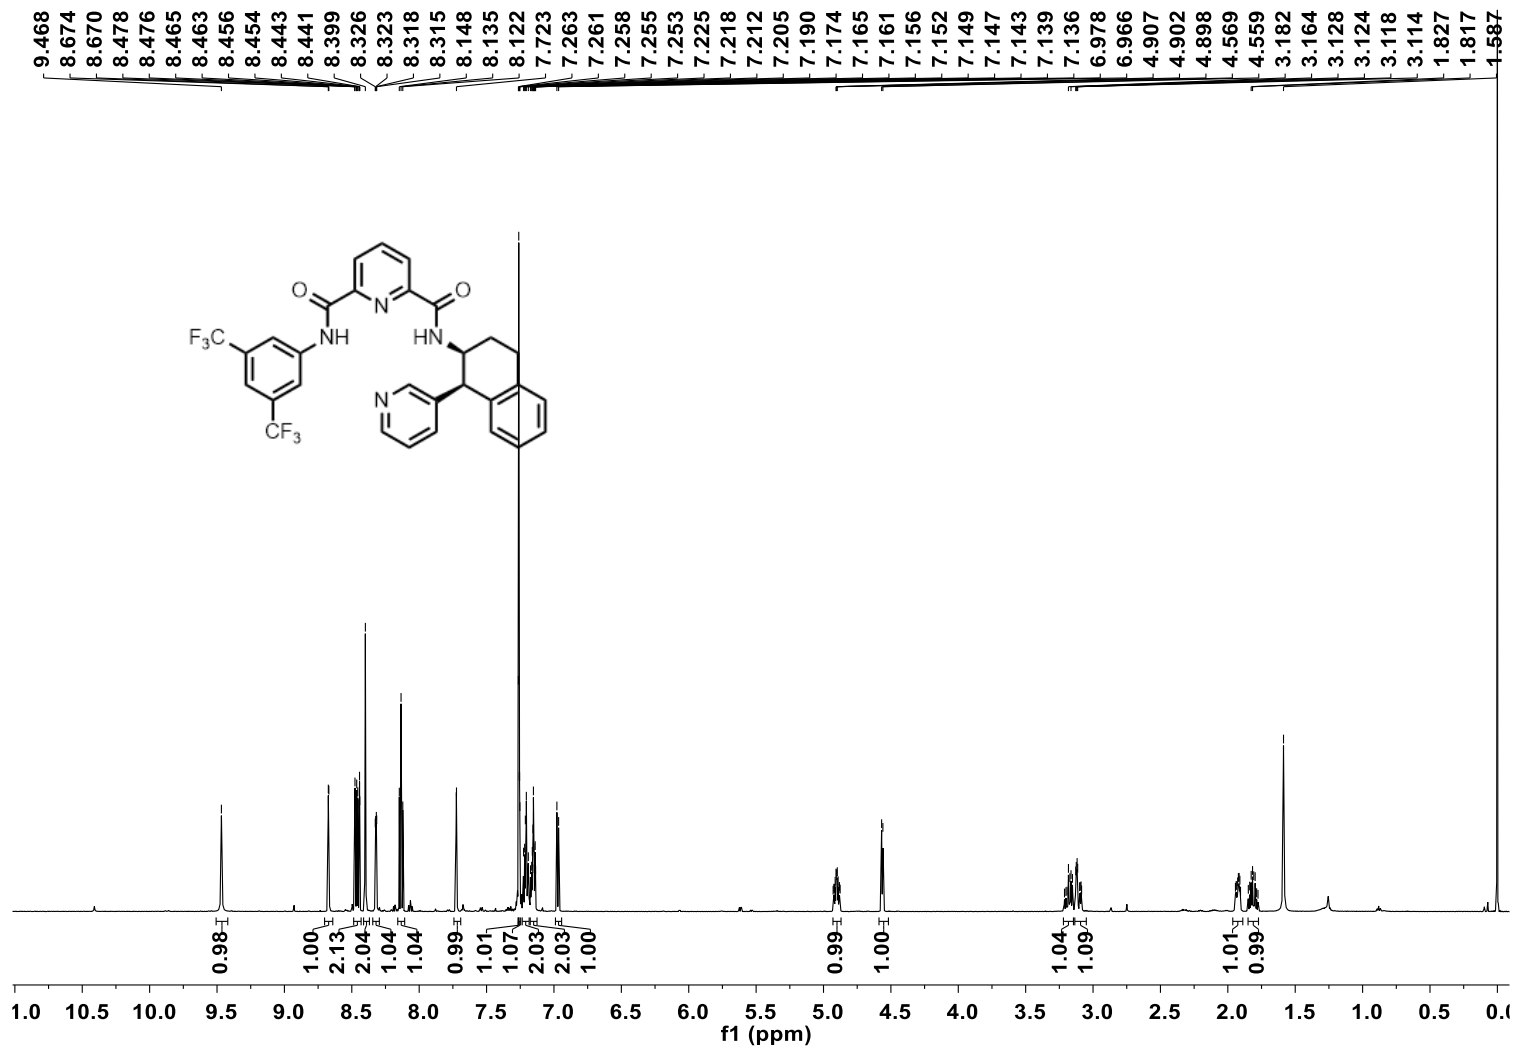

9.468  
8.674  
8.670  
8.478  
8.476  
8.465  
8.463  
8.456  
8.454  
8.443  
8.441  
8.399  
8.326  
8.323  
8.318  
8.315  
8.148  
8.135  
8.122  
7.723  
7.263  
7.261  
7.258  
7.255  
7.253  
7.225  
7.218  
7.212  
7.205  
7.190  
7.174  
7.165  
7.161  
7.156  
7.152  
7.149  
7.147  
7.143  
7.139  
7.136  
6.978  
6.966  
4.907  
4.902  
4.898  
4.569  
4.559  
3.182  
3.164  
3.128  
3.124  
3.118  
3.114  
1.827  
1.817  
1.587

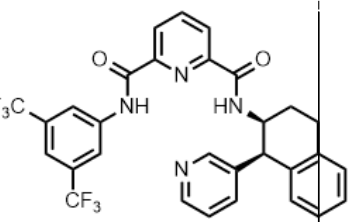

0.98  
1.00  
2.13  
2.04  
1.04  
1.04  
0.99  
1.01  
1.07  
2.03  
2.03  
1.00  
0.99  
1.00  
1.04  
1.09  
1.01  
0.99

f1 (ppm)

<sup>13</sup>C NMR (151 MHz, CDCl<sub>3</sub>) spectrum of *cis*-T24

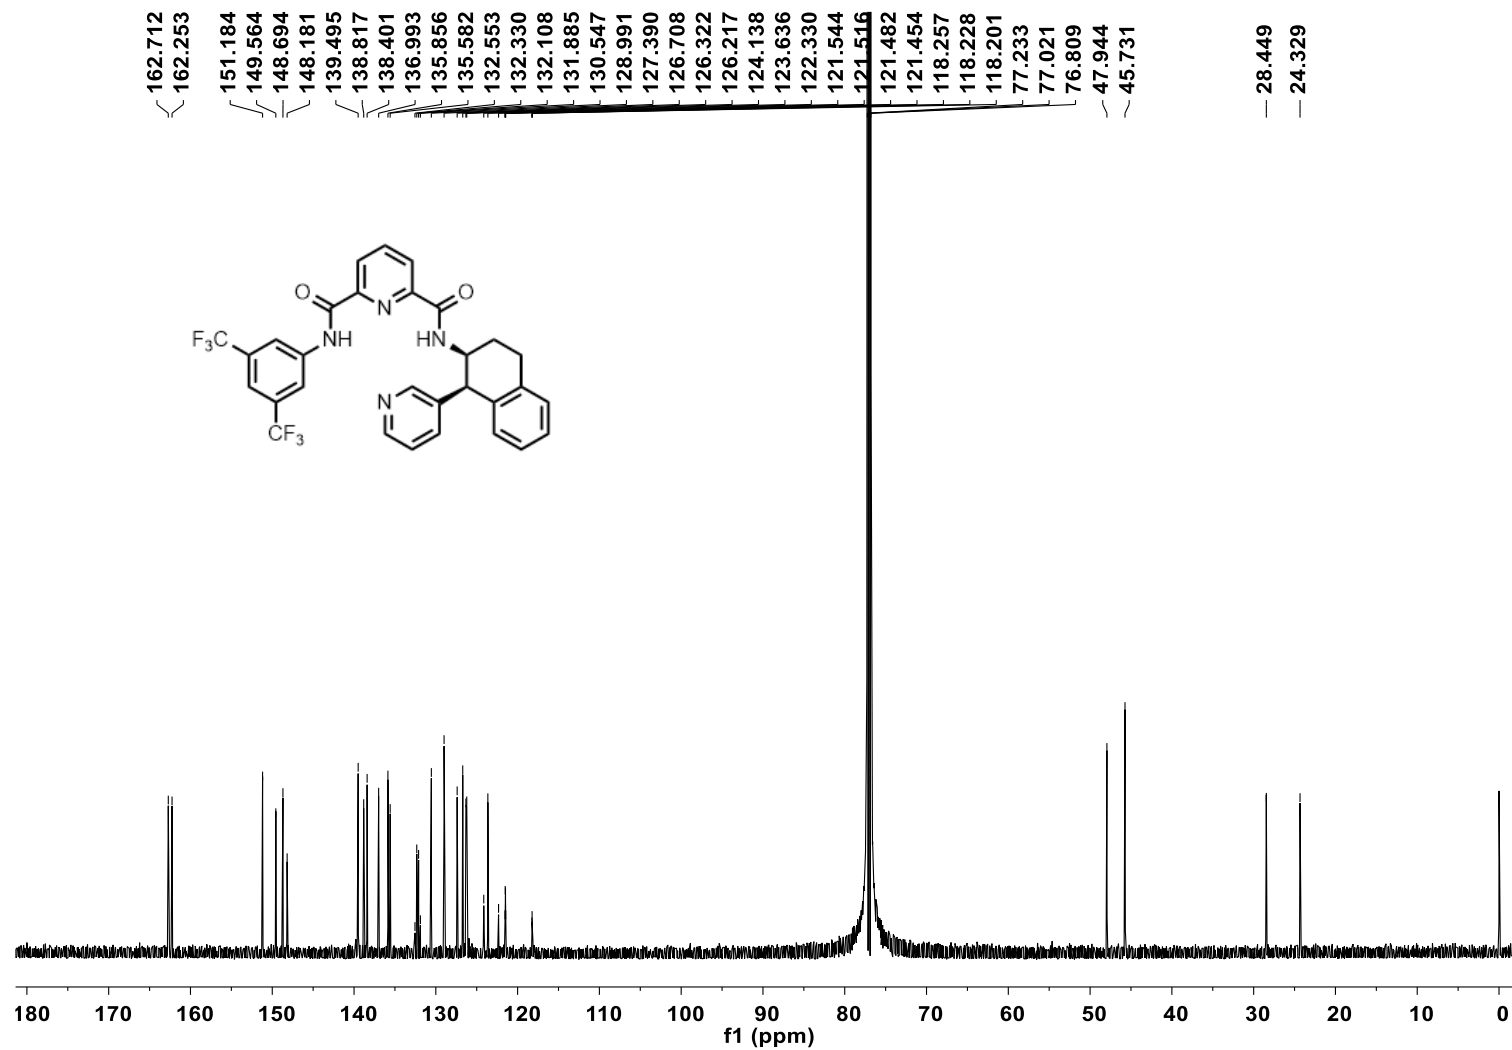

162.712  
162.253  
151.184  
149.564  
148.694  
148.181  
139.495  
138.817  
138.401  
136.993  
135.856  
135.582  
132.553  
132.330  
132.108  
131.885  
130.547  
128.991  
127.390  
126.708  
126.322  
126.217  
124.138  
123.636  
122.330  
121.544  
121.516  
121.482  
121.454  
118.257  
118.228  
118.201  
77.233  
77.021  
76.809  
47.944  
45.731  
28.449  
24.329

$^{19}\text{F}$  NMR (376 MHz,  $\text{CDCl}_3$ ) spectrum of *cis*-T24

-65.408

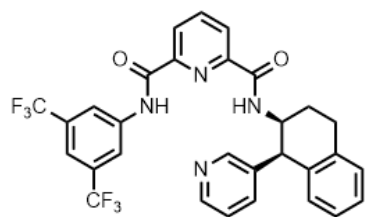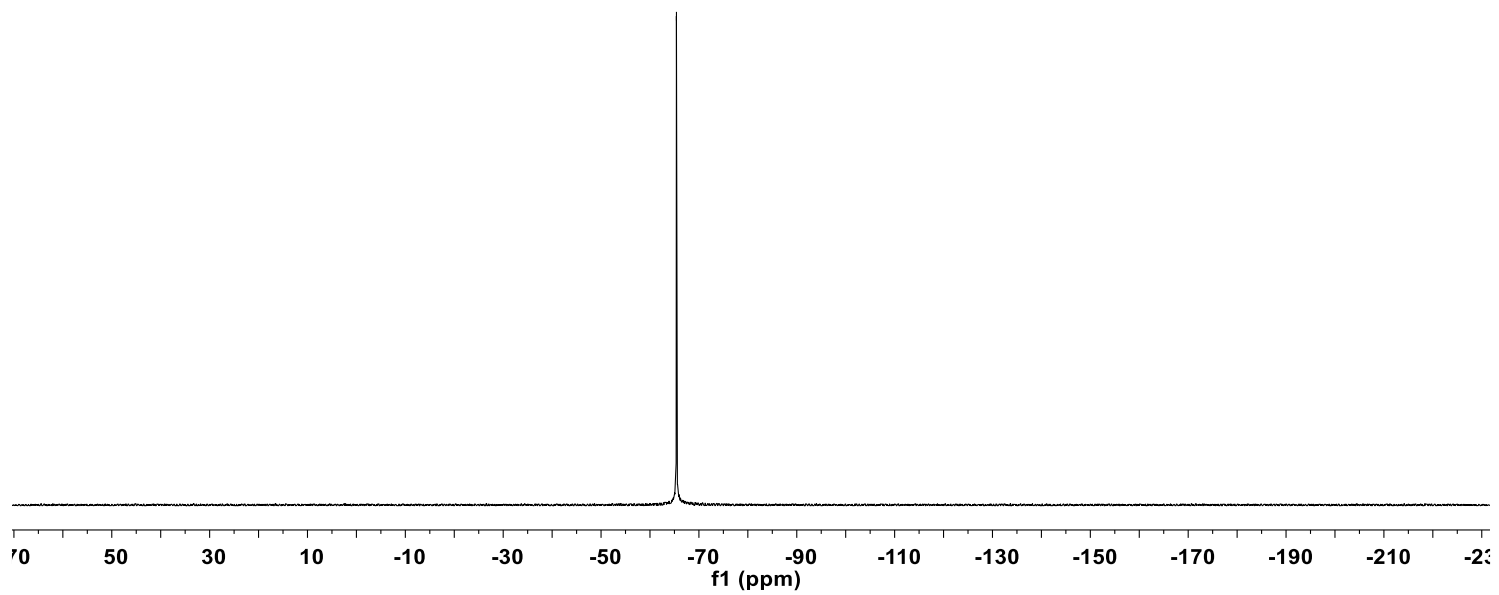

<sup>1</sup>H NMR (600 MHz, CDCl<sub>3</sub>) spectrum of *trans*-T24

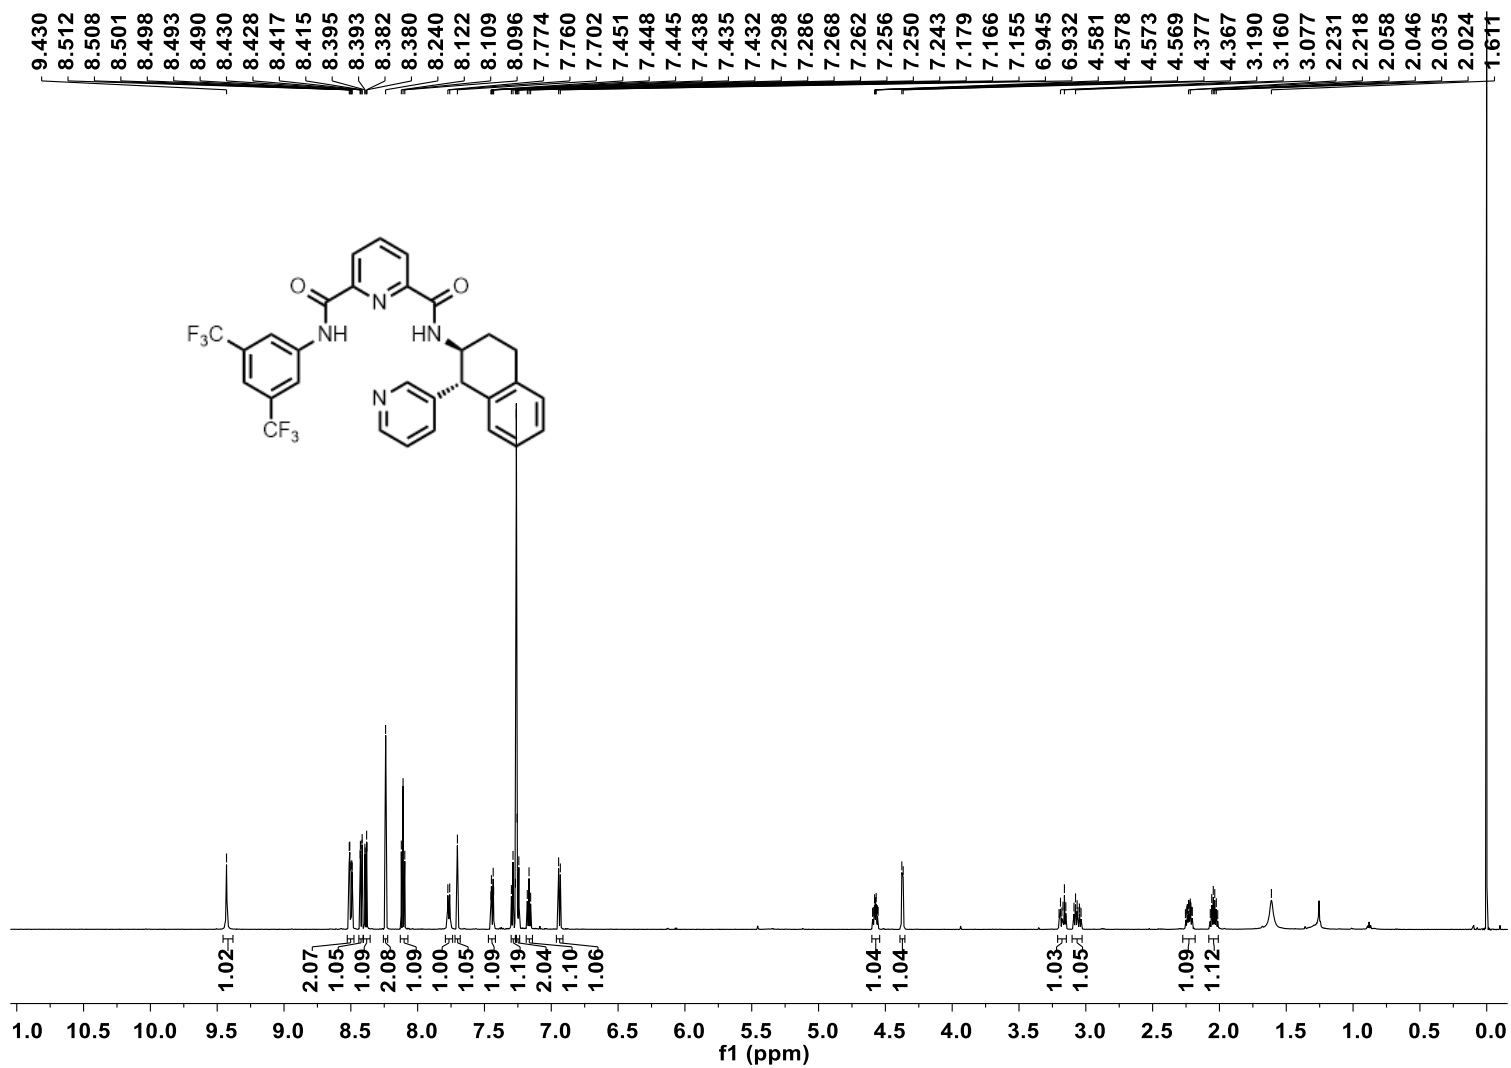



<sup>13</sup>C NMR (151 MHz, CDCl<sub>3</sub>) spectrum of *trans*-T24

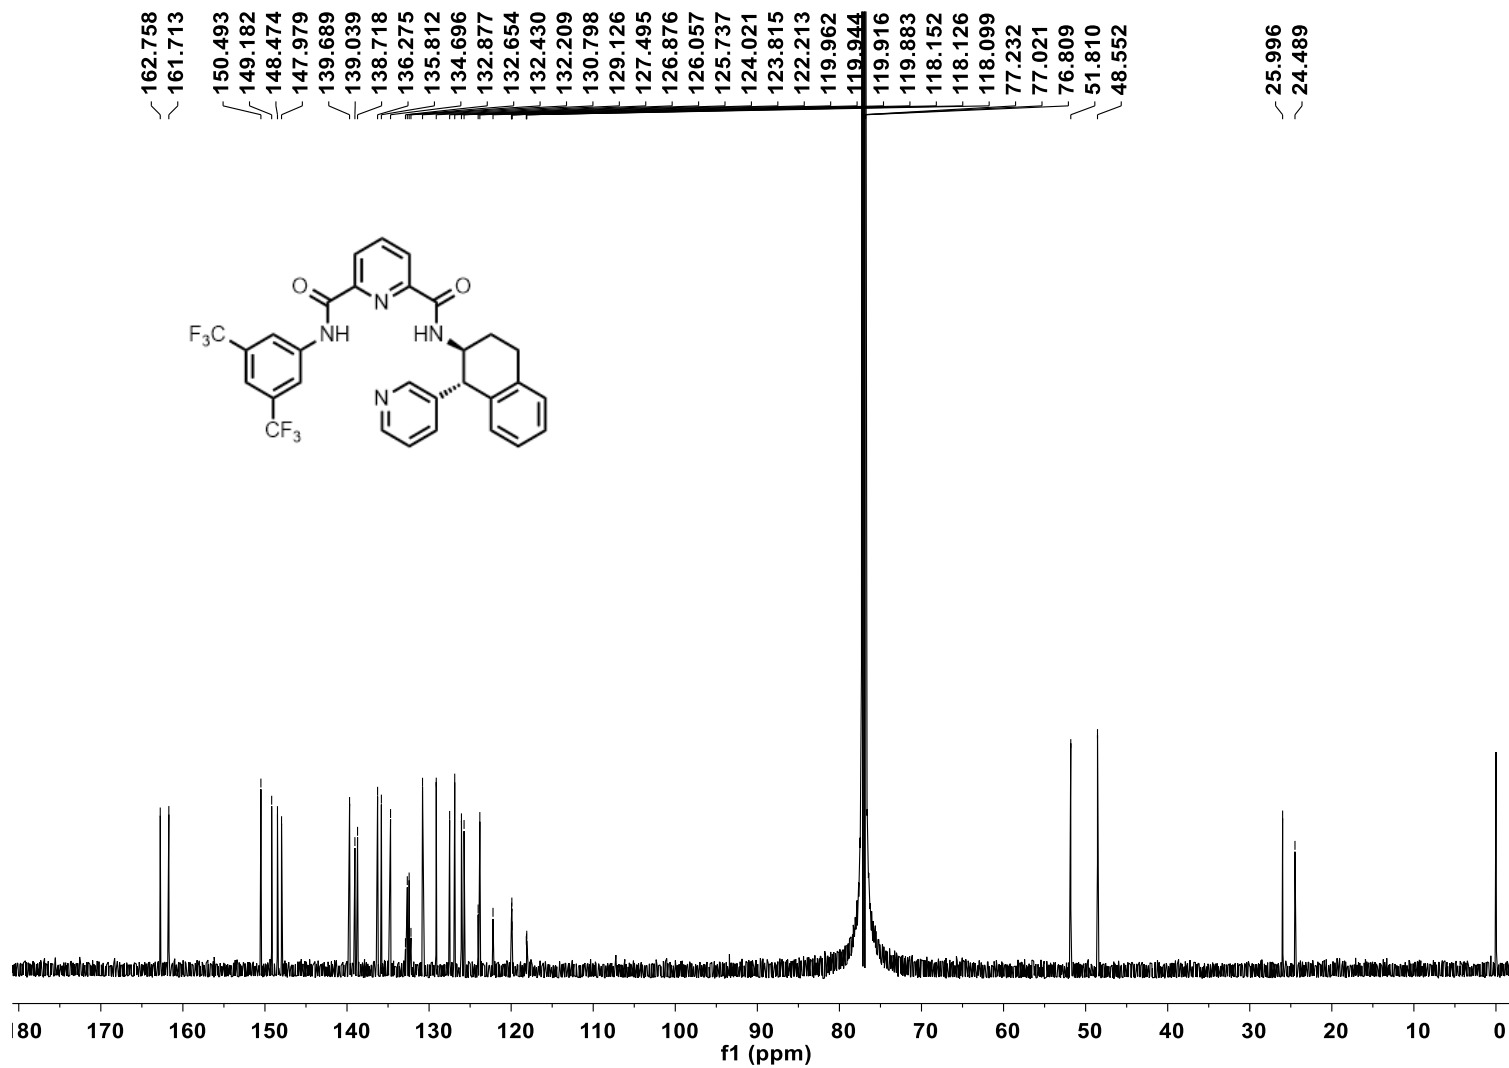

$^{19}\text{F}$  NMR (376 MHz,  $\text{CDCl}_3$ ) spectrum of *trans*-T24

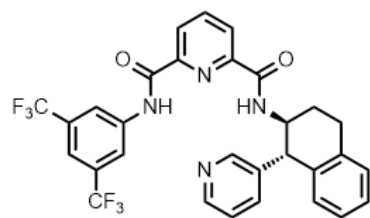

— -65.459

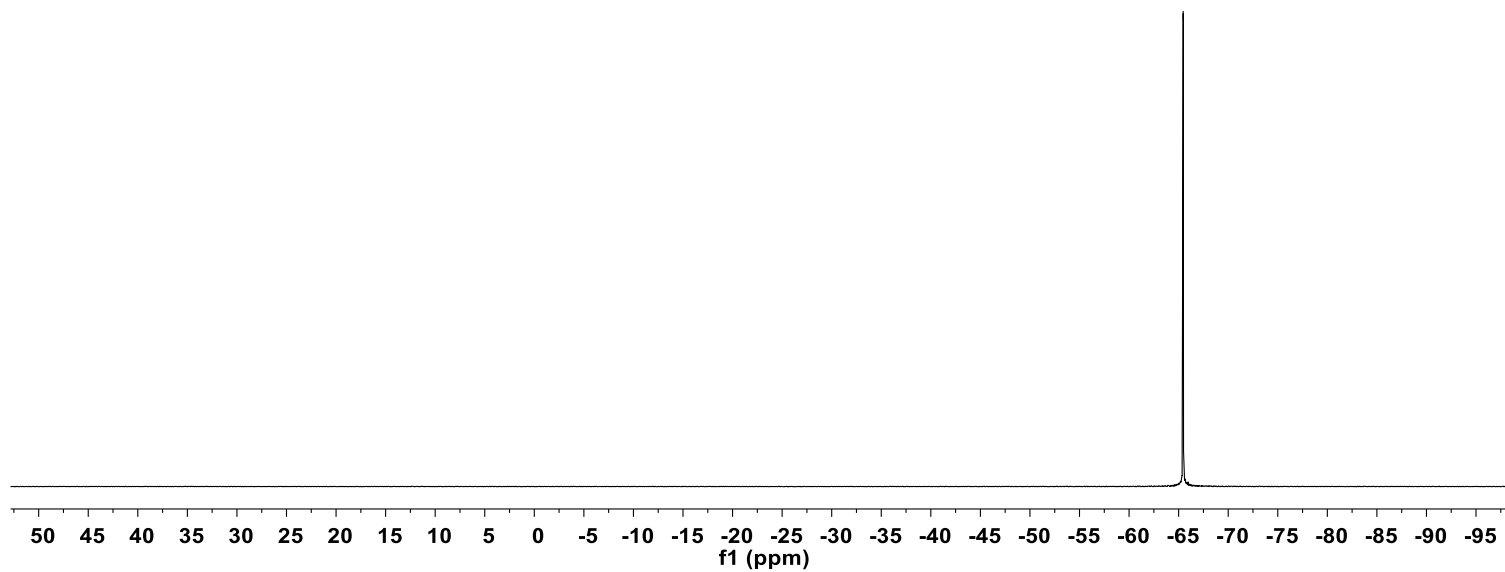

$^1\text{H}$  NMR (600 MHz,  $\text{CDCl}_3$ ) spectrum of *cis*-T25

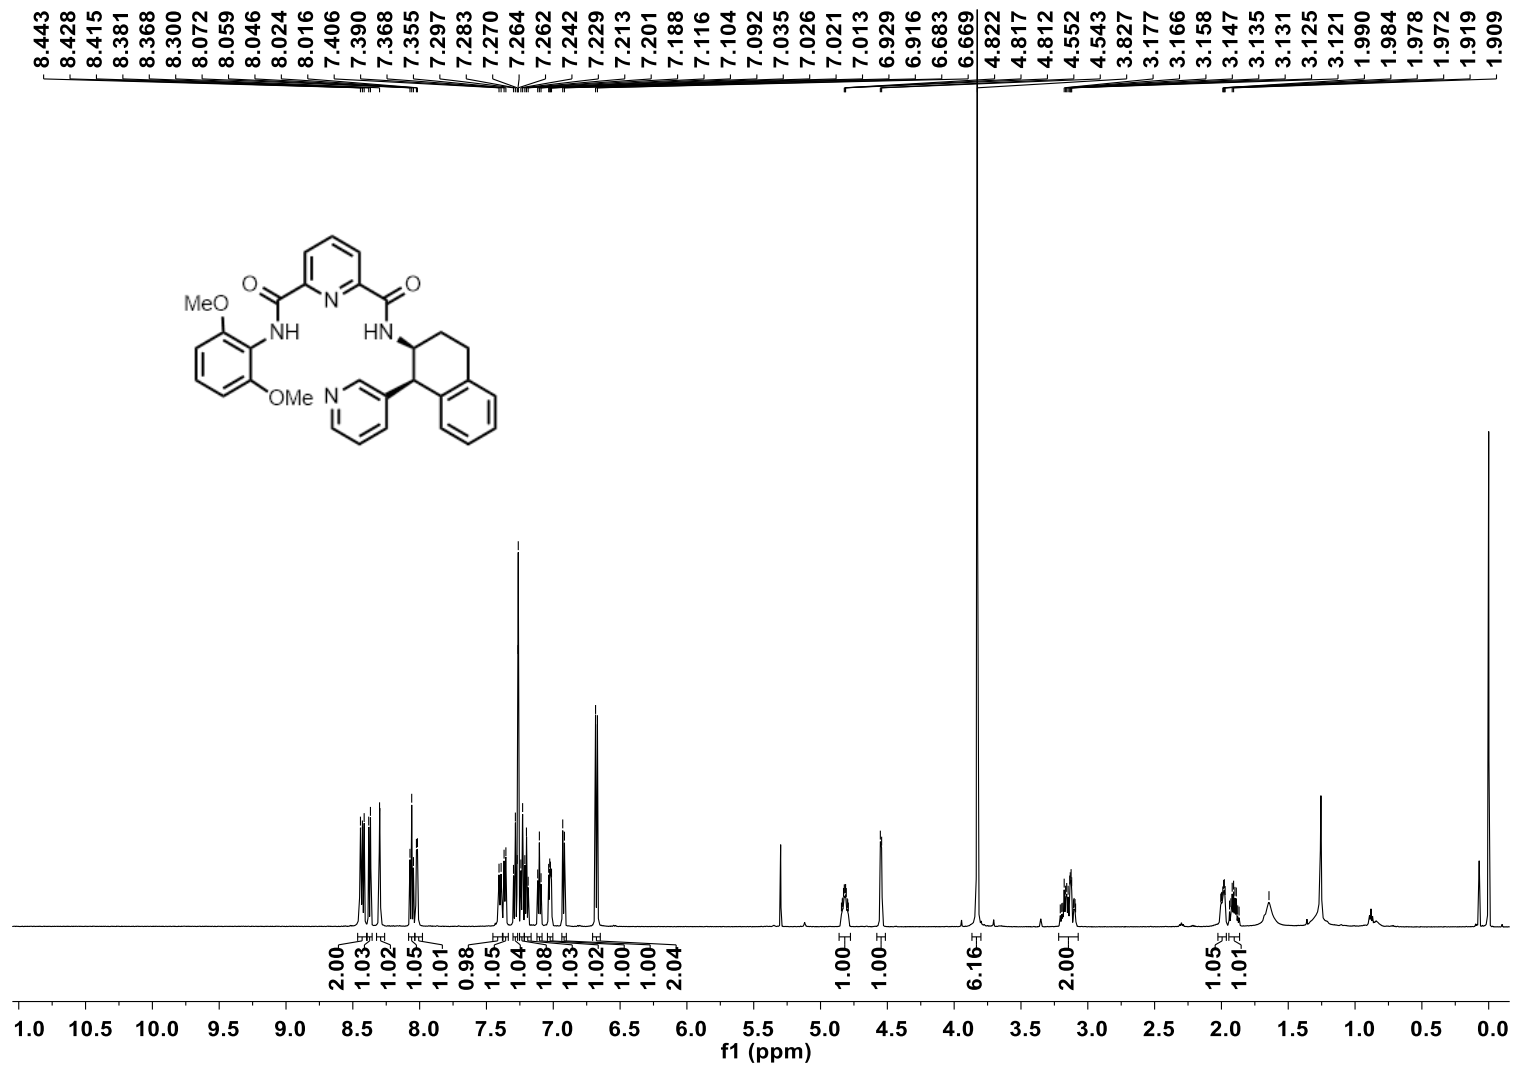

$^{13}\text{C}$  NMR (151 MHz,  $\text{CDCl}_3$ ) spectrum of *cis*-T25

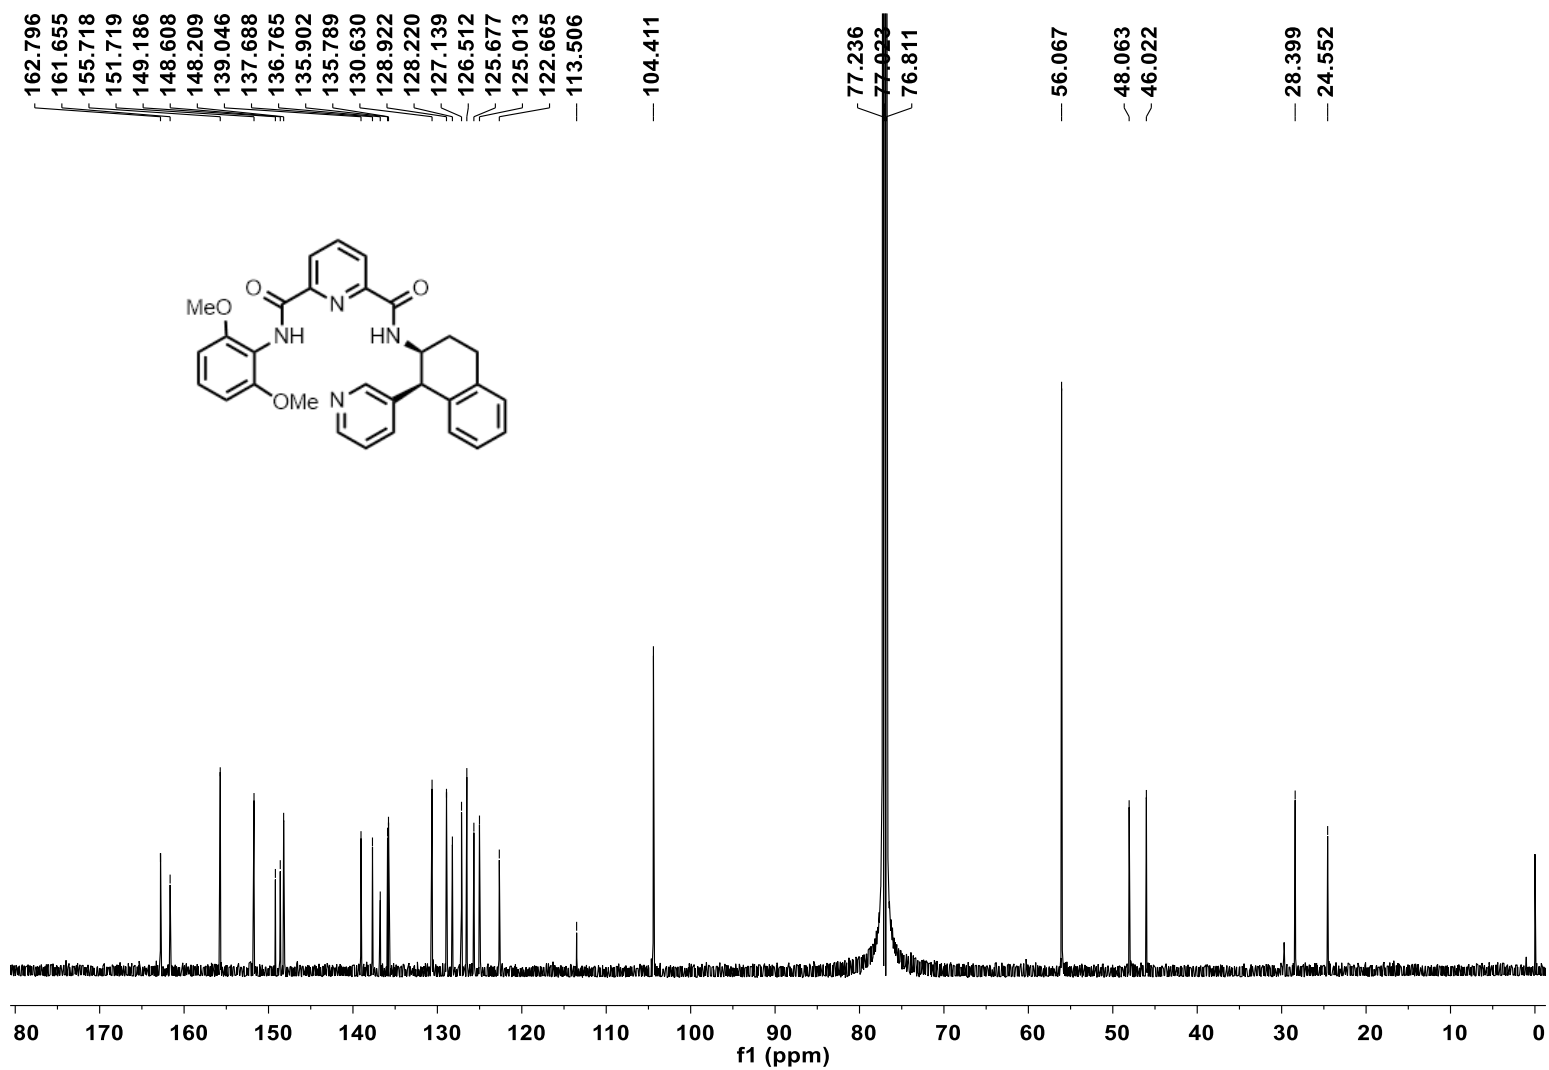

<sup>1</sup>H NMR (600 MHz, CDCl<sub>3</sub>) spectrum of *trans*-T25

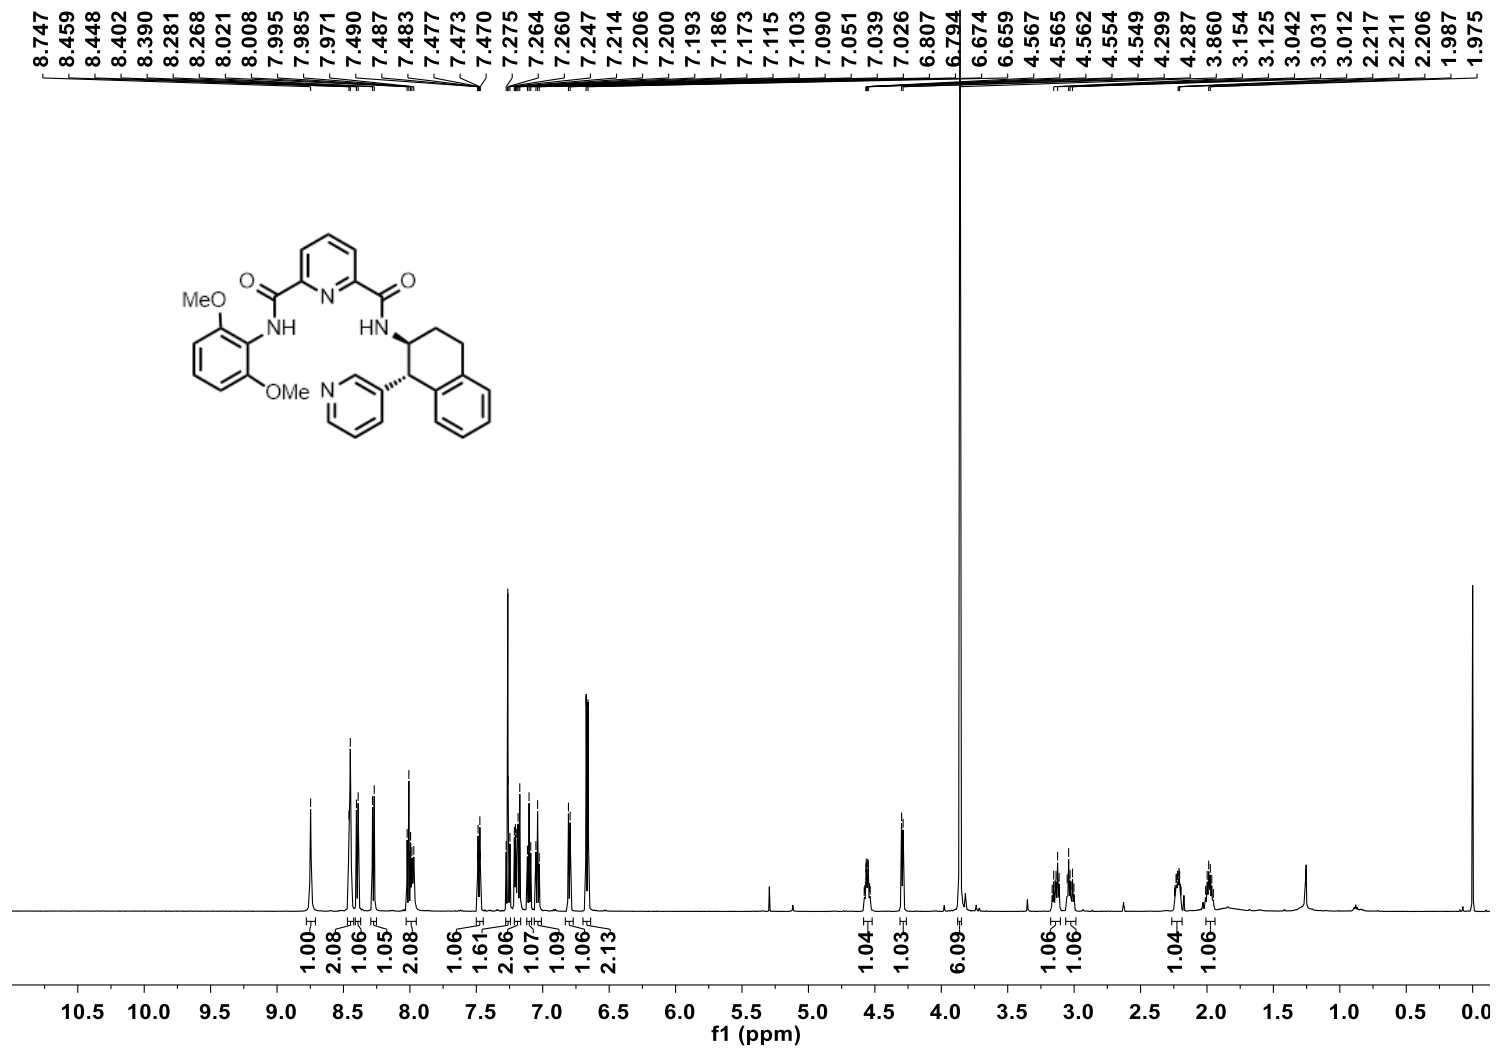

$^{13}\text{C}$  NMR (151 MHz,  $\text{CDCl}_3$ ) spectrum of *trans*-T25

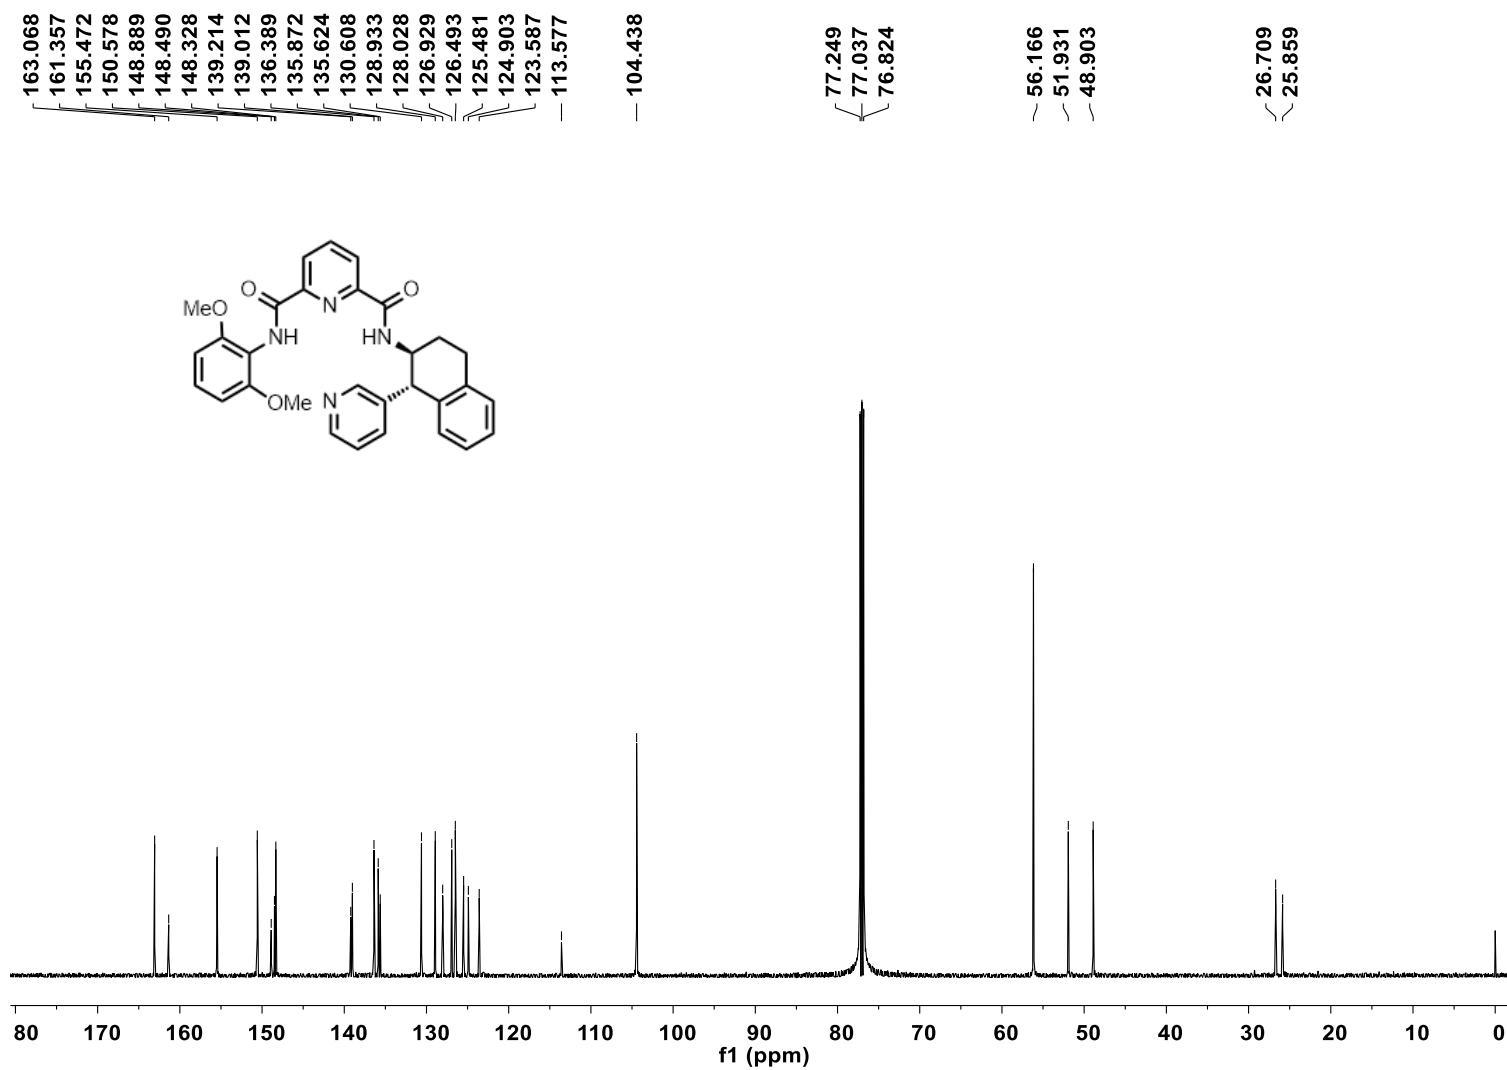

<sup>1</sup>H NMR (600 MHz, CDCl<sub>3</sub>) spectrum of *cis*-T26

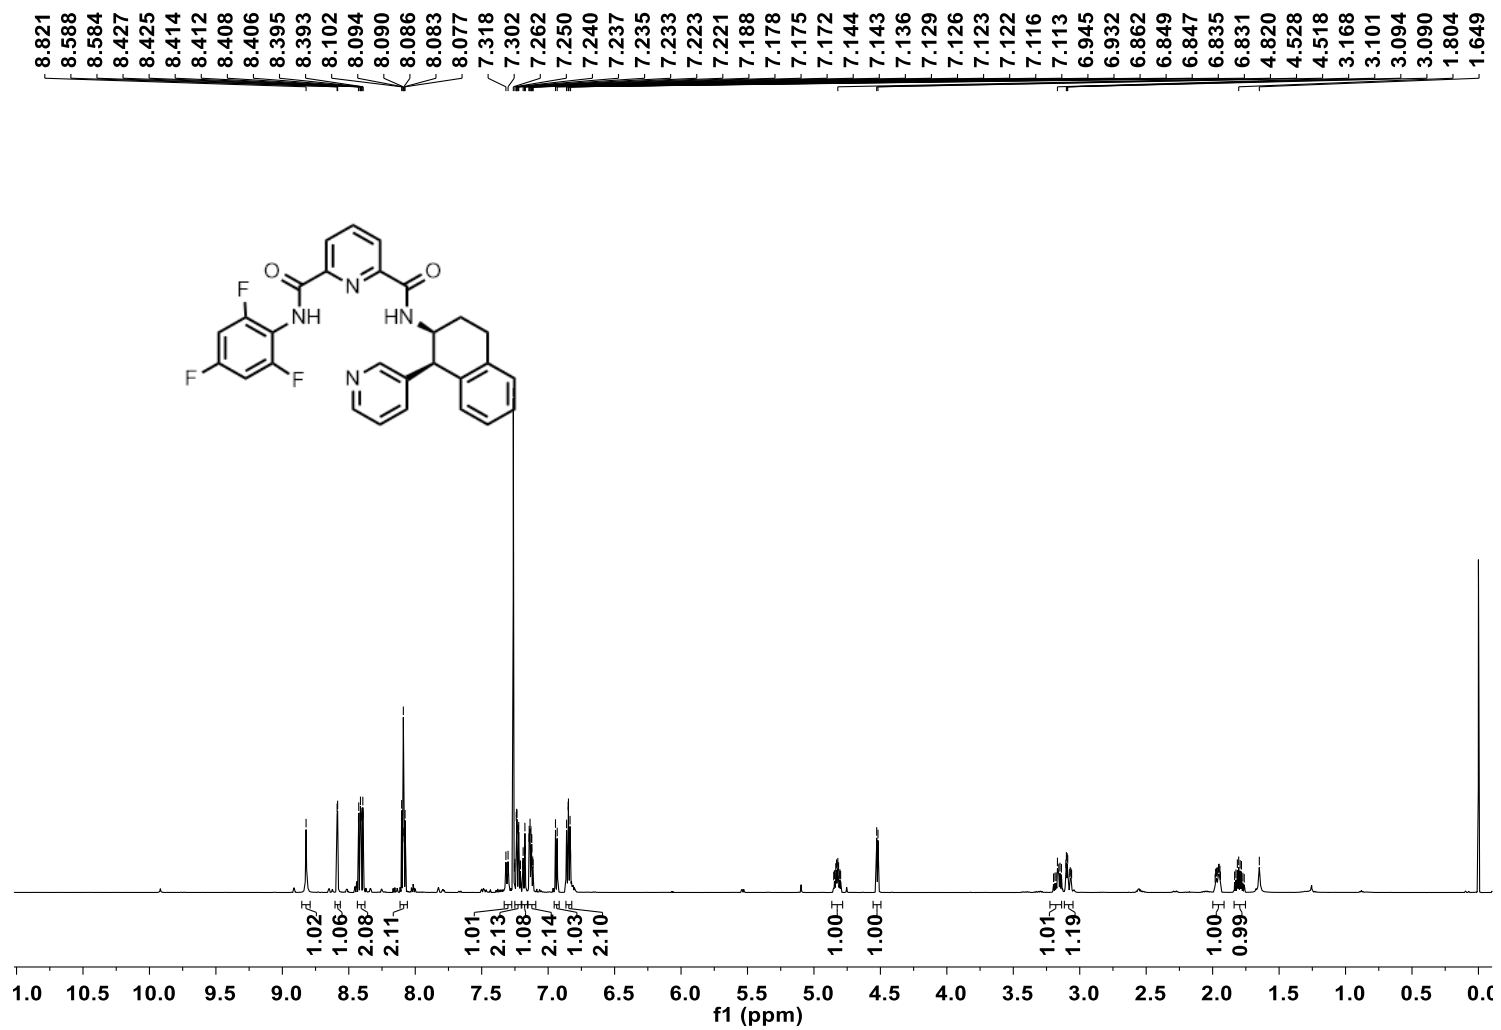

$^{13}\text{C}$  NMR (151 MHz,  $\text{CDCl}_3$ ) spectrum of *cis*-T26

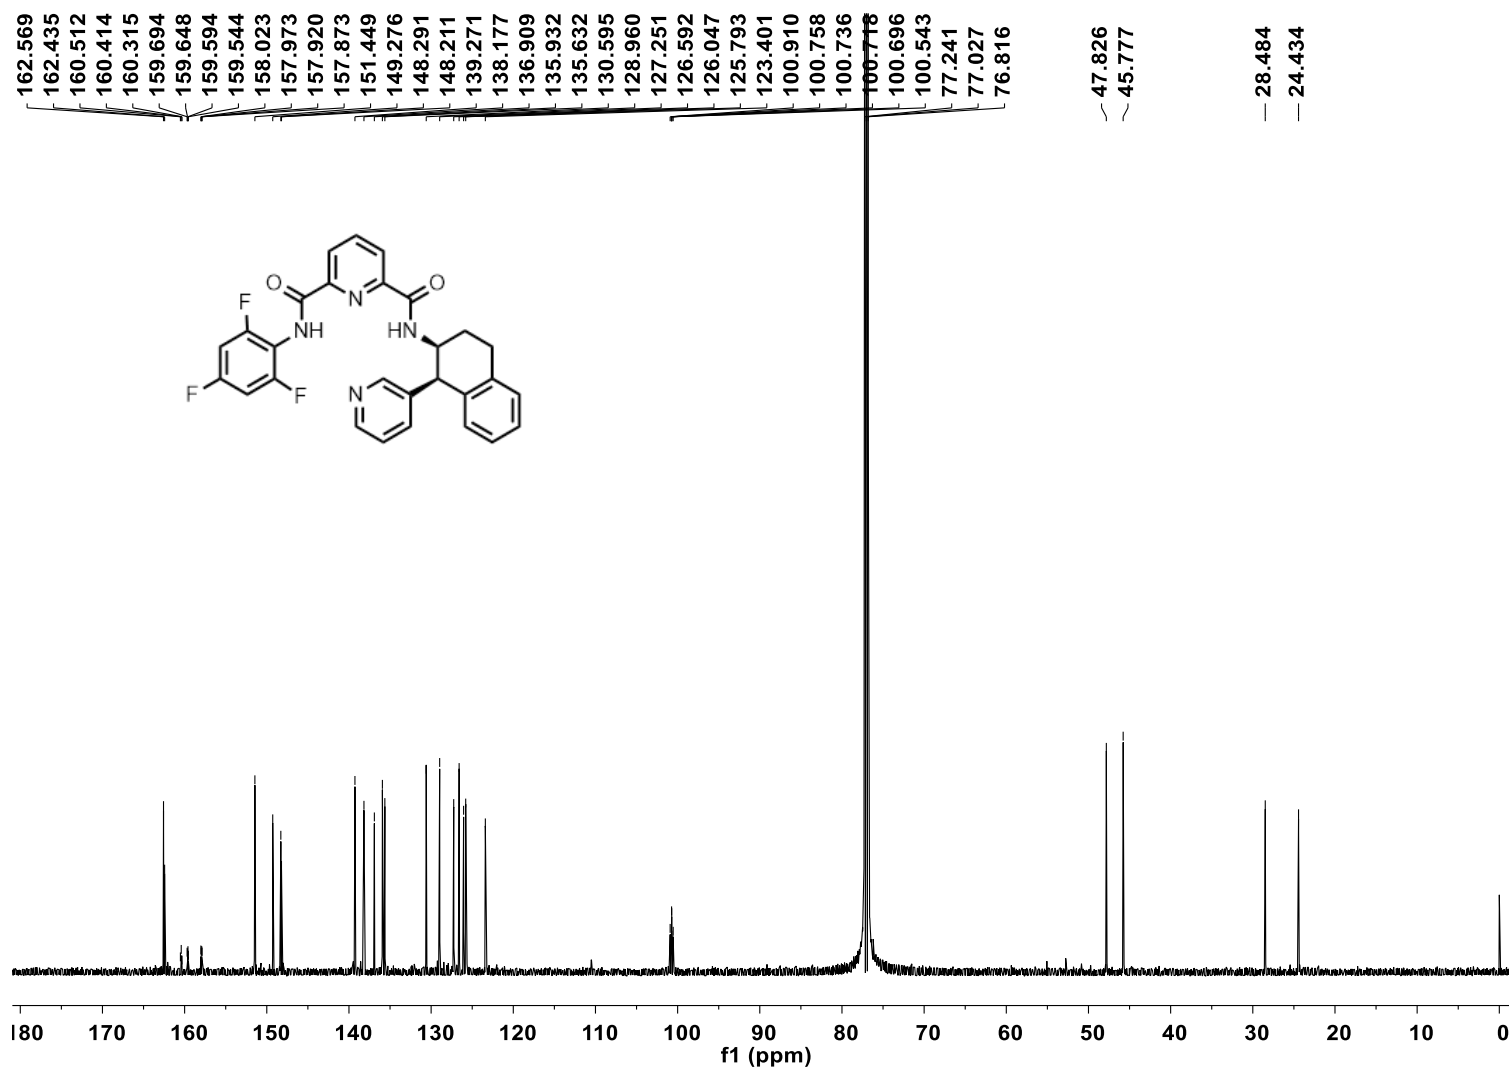



$^{19}\text{F}$  NMR (376 MHz,  $\text{CDCl}_3$ ) spectrum of *cis*-T26

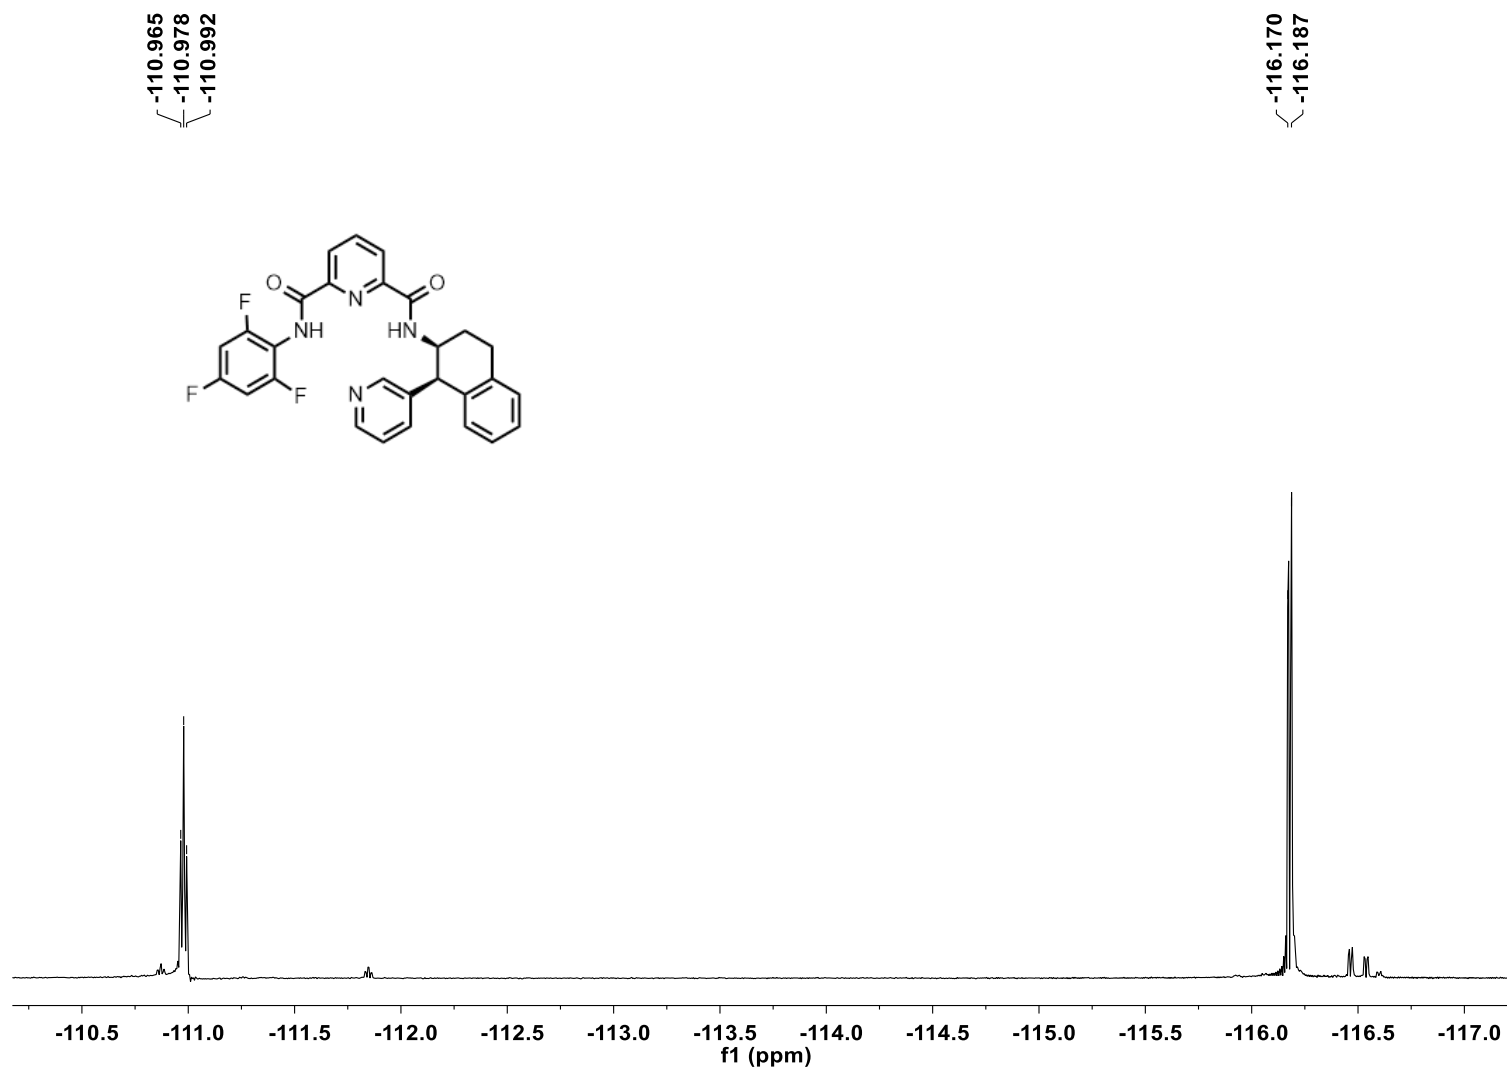

<sup>1</sup>H NMR (600 MHz, CDCl<sub>3</sub>) spectrum of *cis*-T27

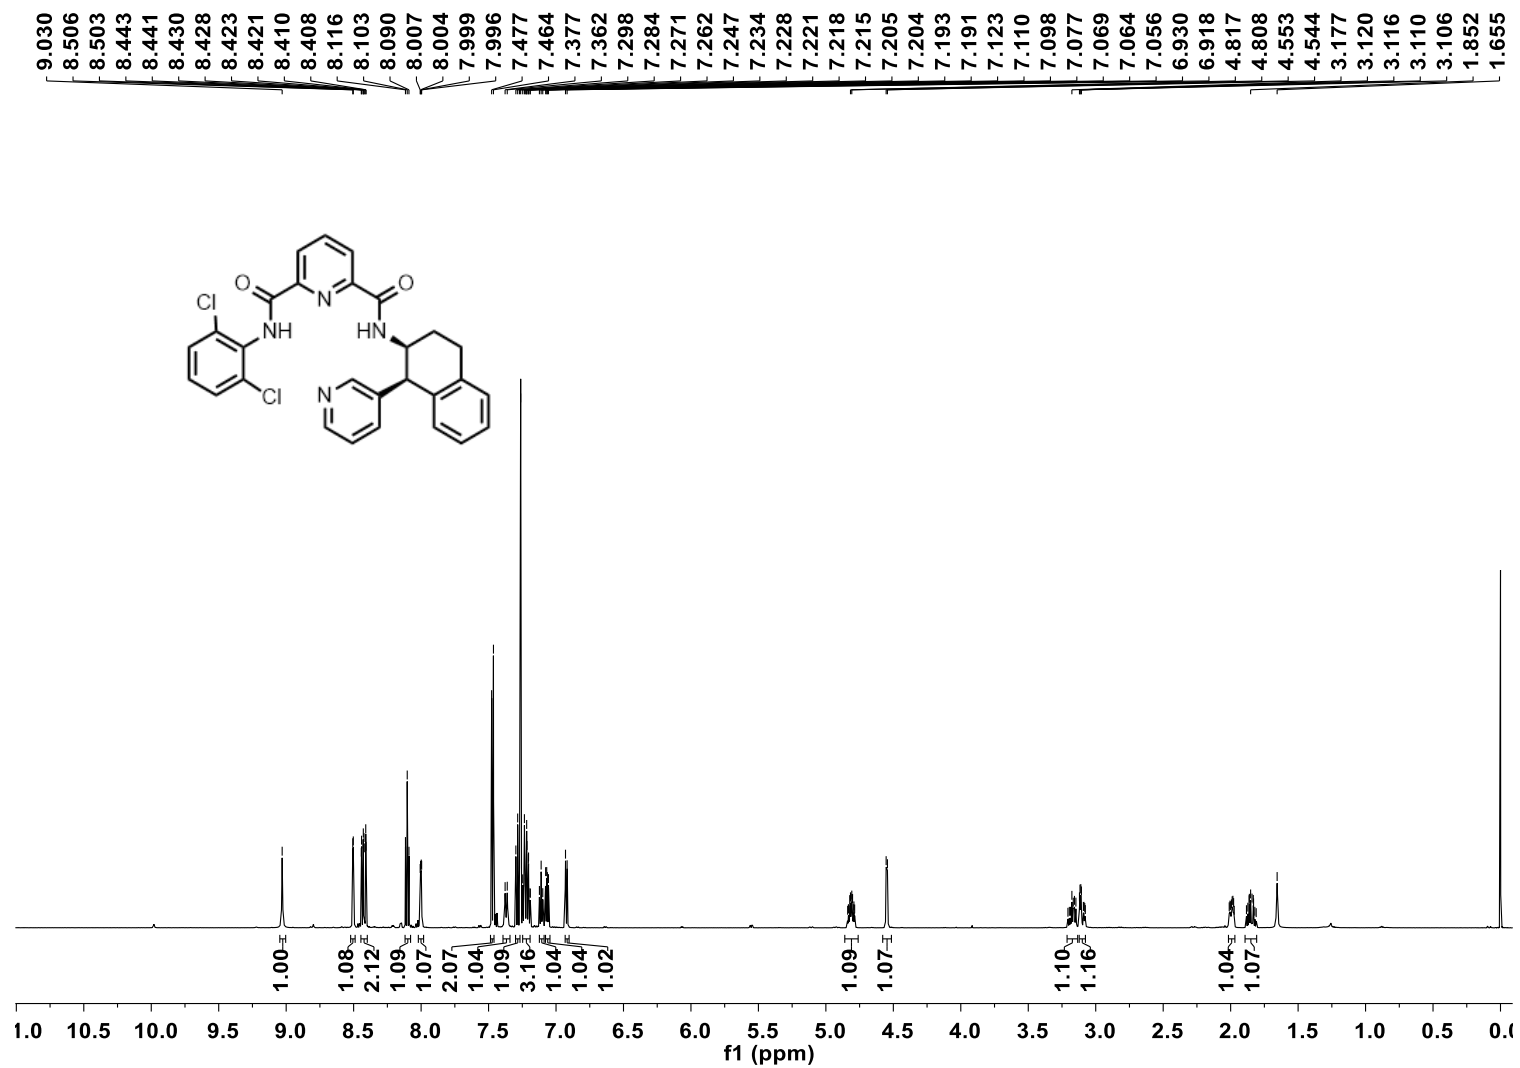

$^{13}\text{C}$  NMR (151 MHz,  $\text{CDCl}_3$ ) spectrum of *cis*-T27

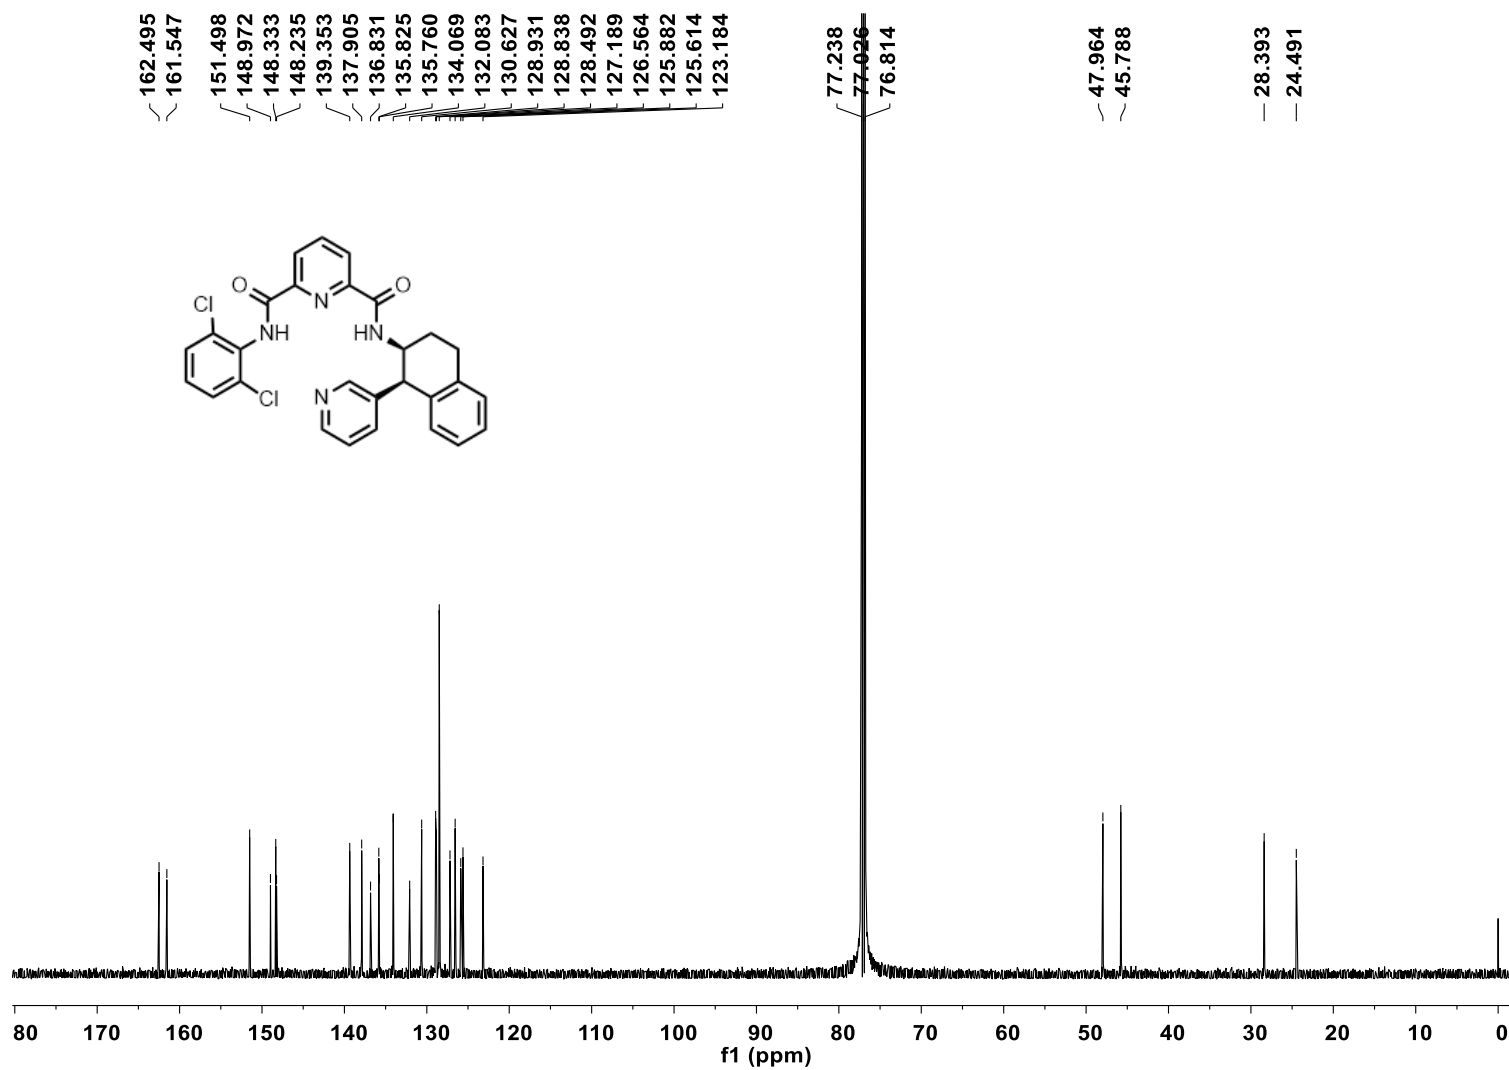

<sup>1</sup>H NMR (600 MHz, CDCl<sub>3</sub>) spectrum of *cis*-T28

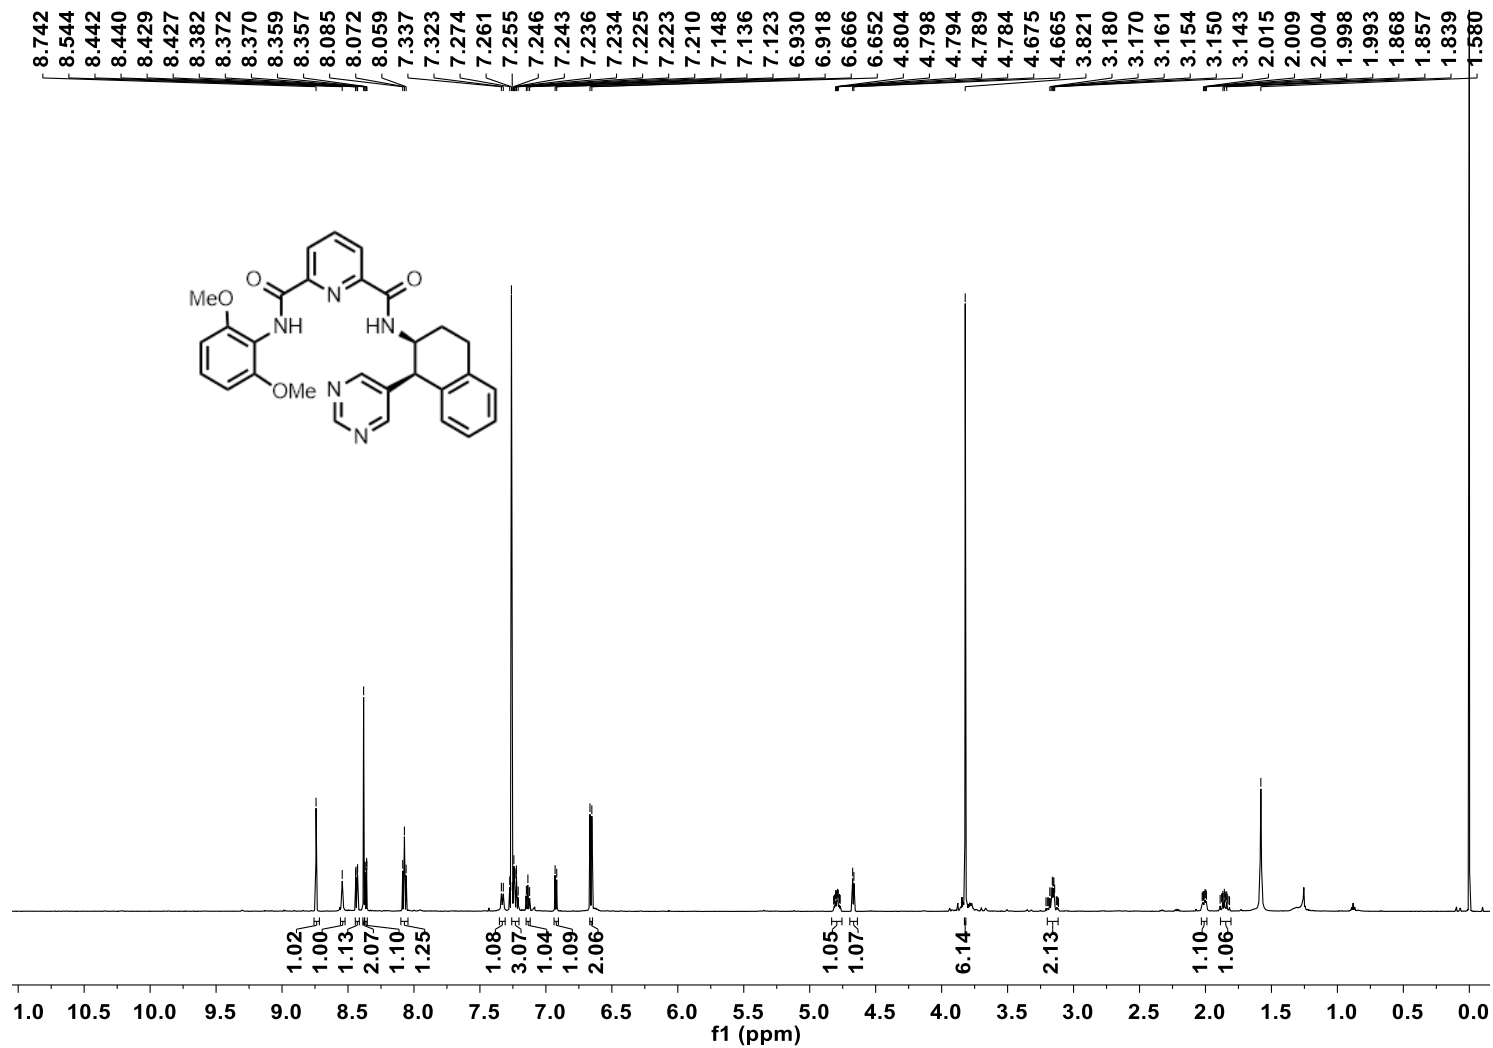

$^{13}\text{C}$  NMR (151 MHz,  $\text{CDCl}_3$ ) spectrum of *cis*-T28

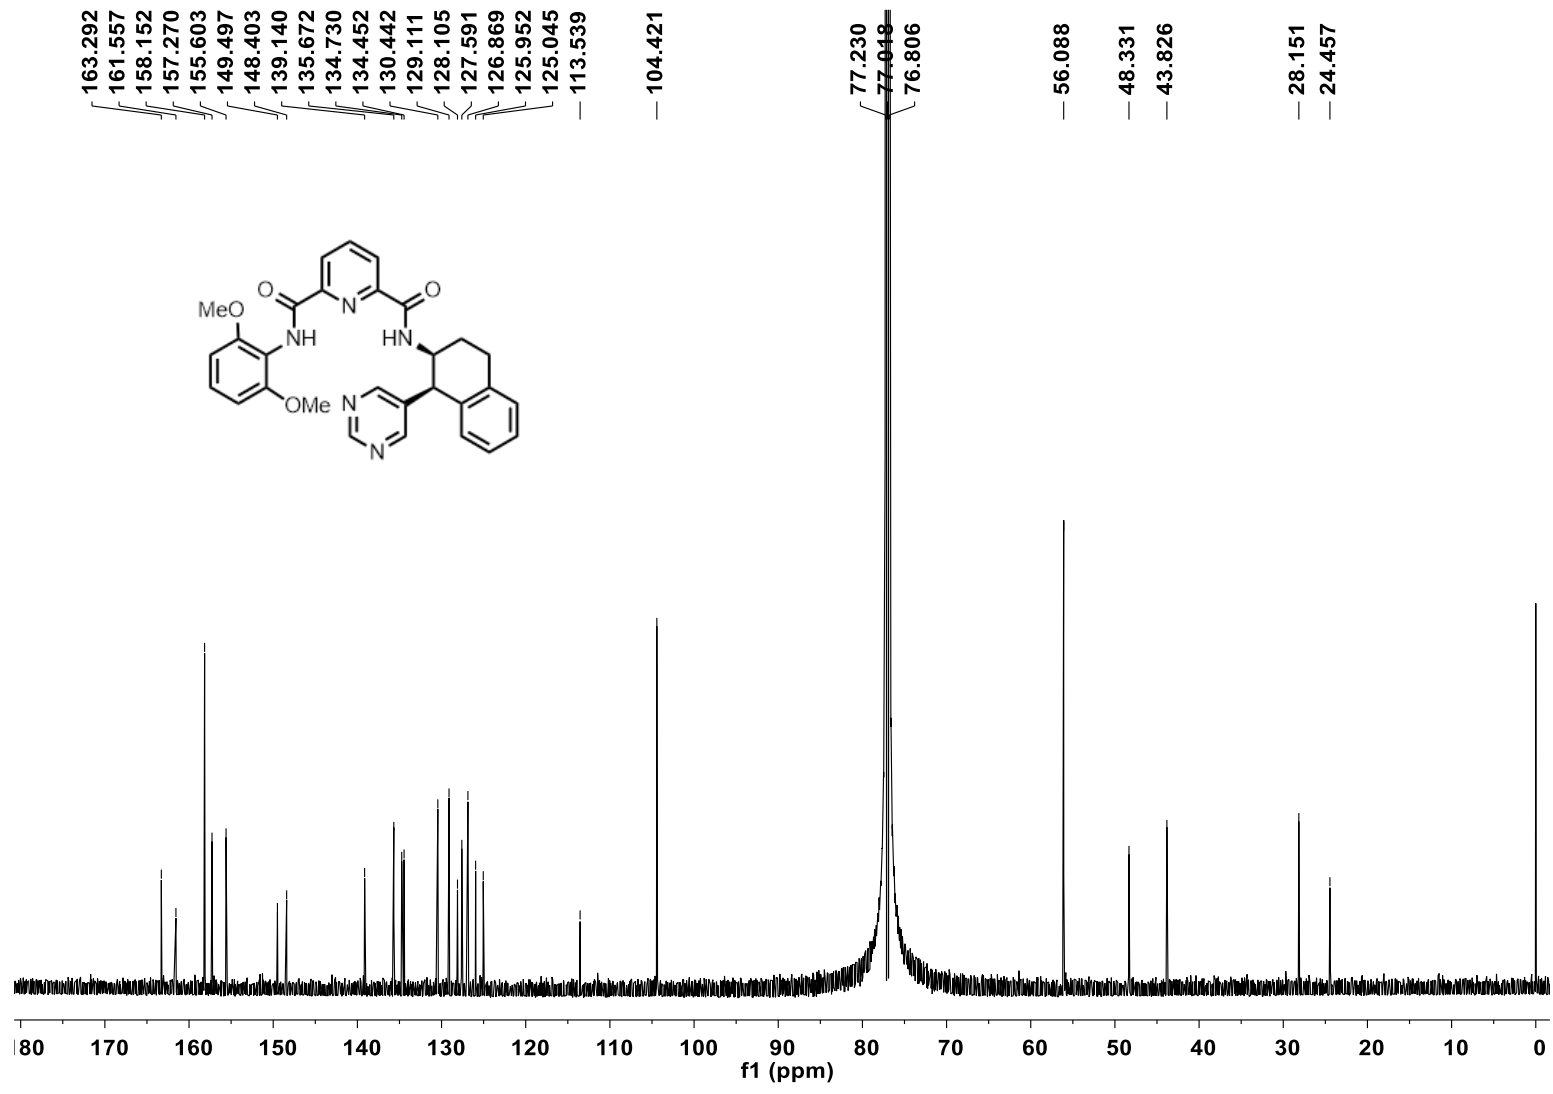

<sup>1</sup>H NMR (600 MHz, CDCl<sub>3</sub>) spectrum of TC1

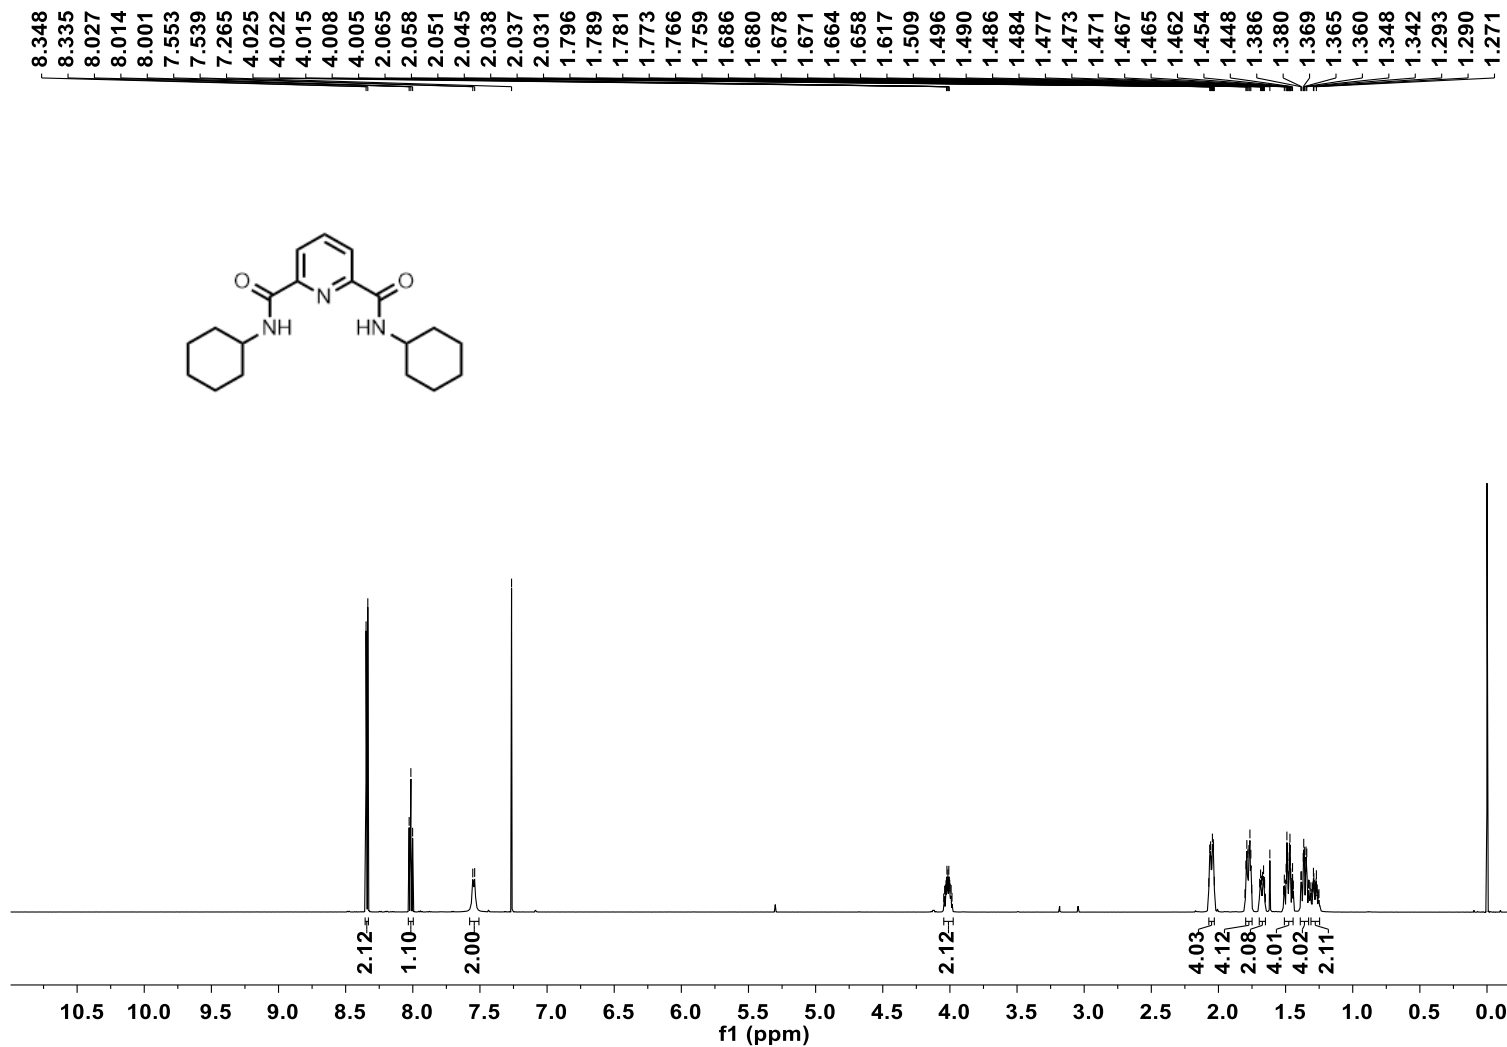

<sup>13</sup>C NMR (151 MHz, CDCl<sub>3</sub>) spectrum of TC1

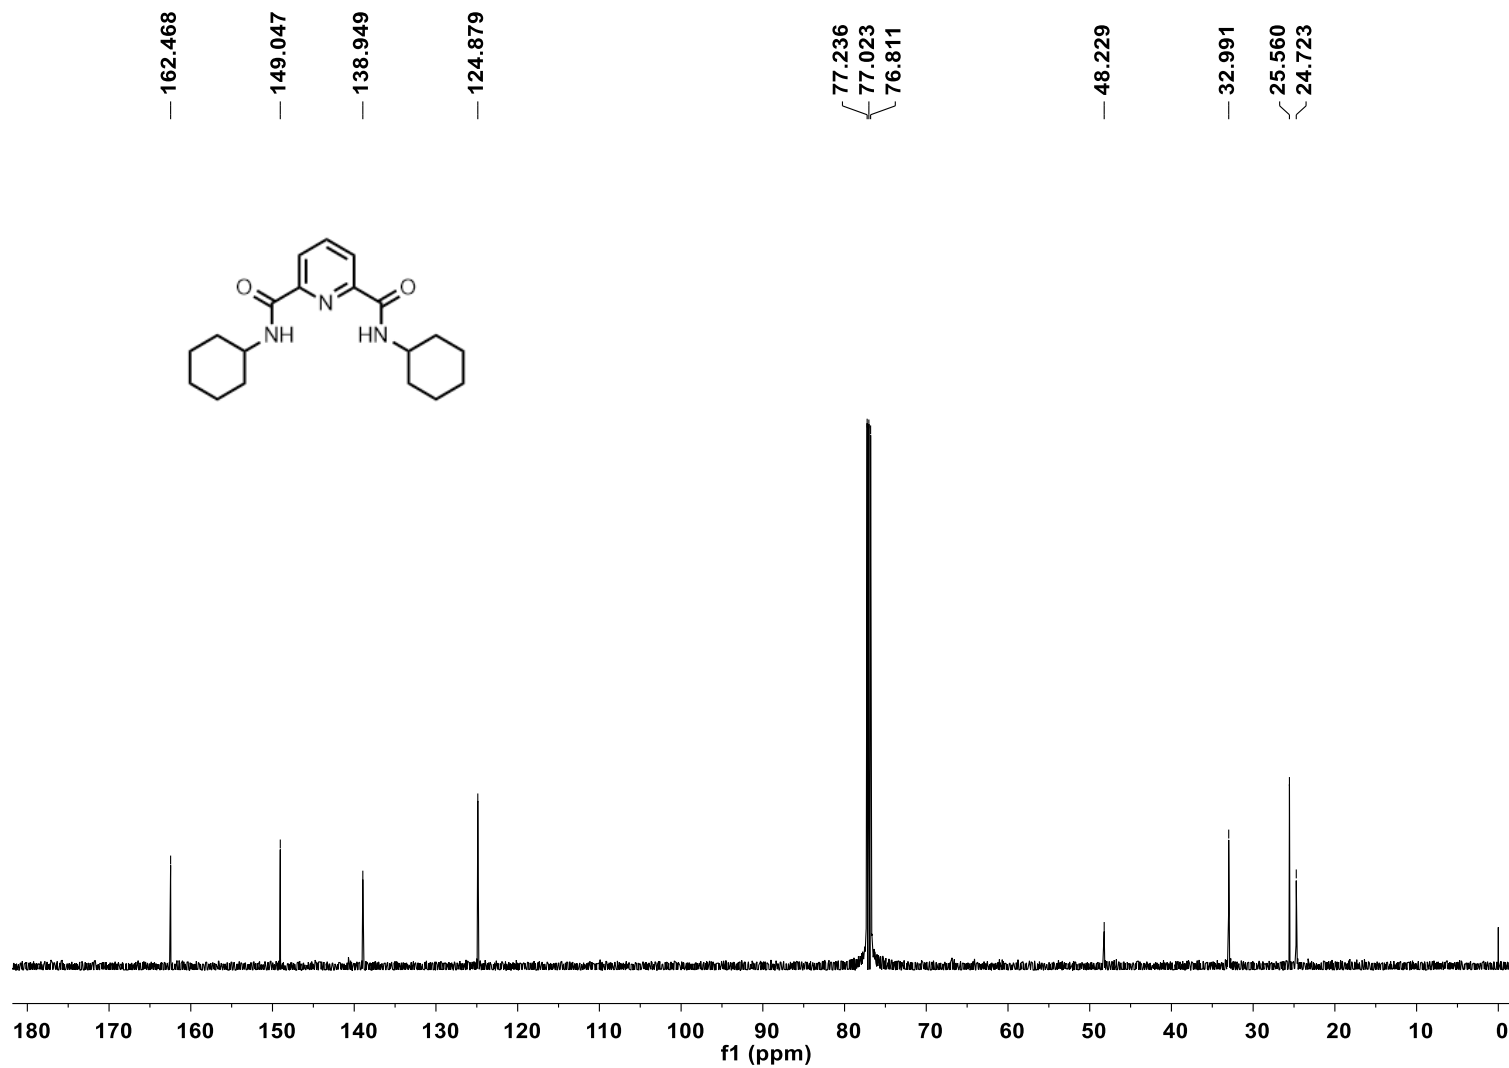

<sup>1</sup>H NMR (600 MHz, CDCl<sub>3</sub>) spectrum of TC2

8.296  
8.284  
8.007  
7.994  
7.981  
— 7.491  
— 7.264

2.171  
2.168  
1.782  
1.763  
1.752  
1.731

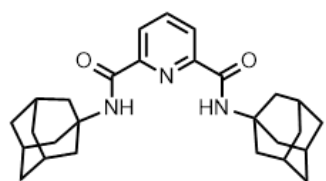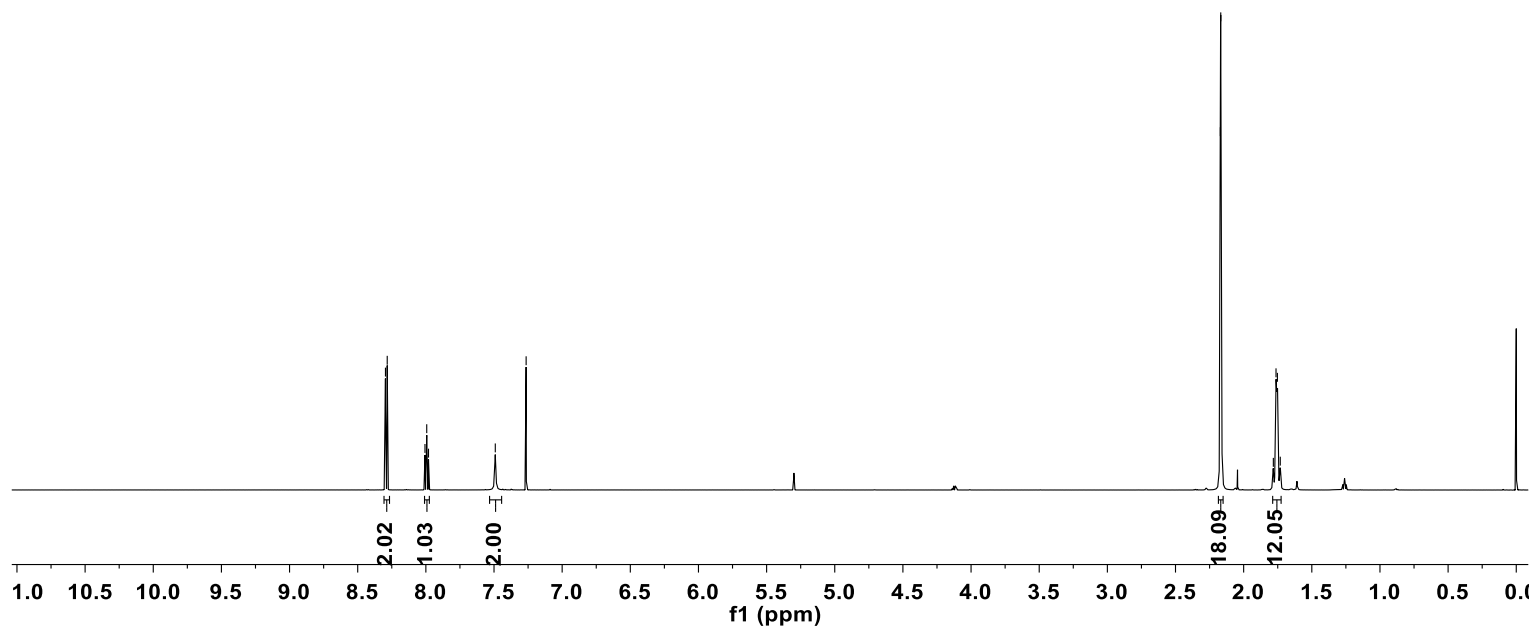



<sup>13</sup>C NMR (151 MHz, CDCl<sub>3</sub>) spectrum of TC2

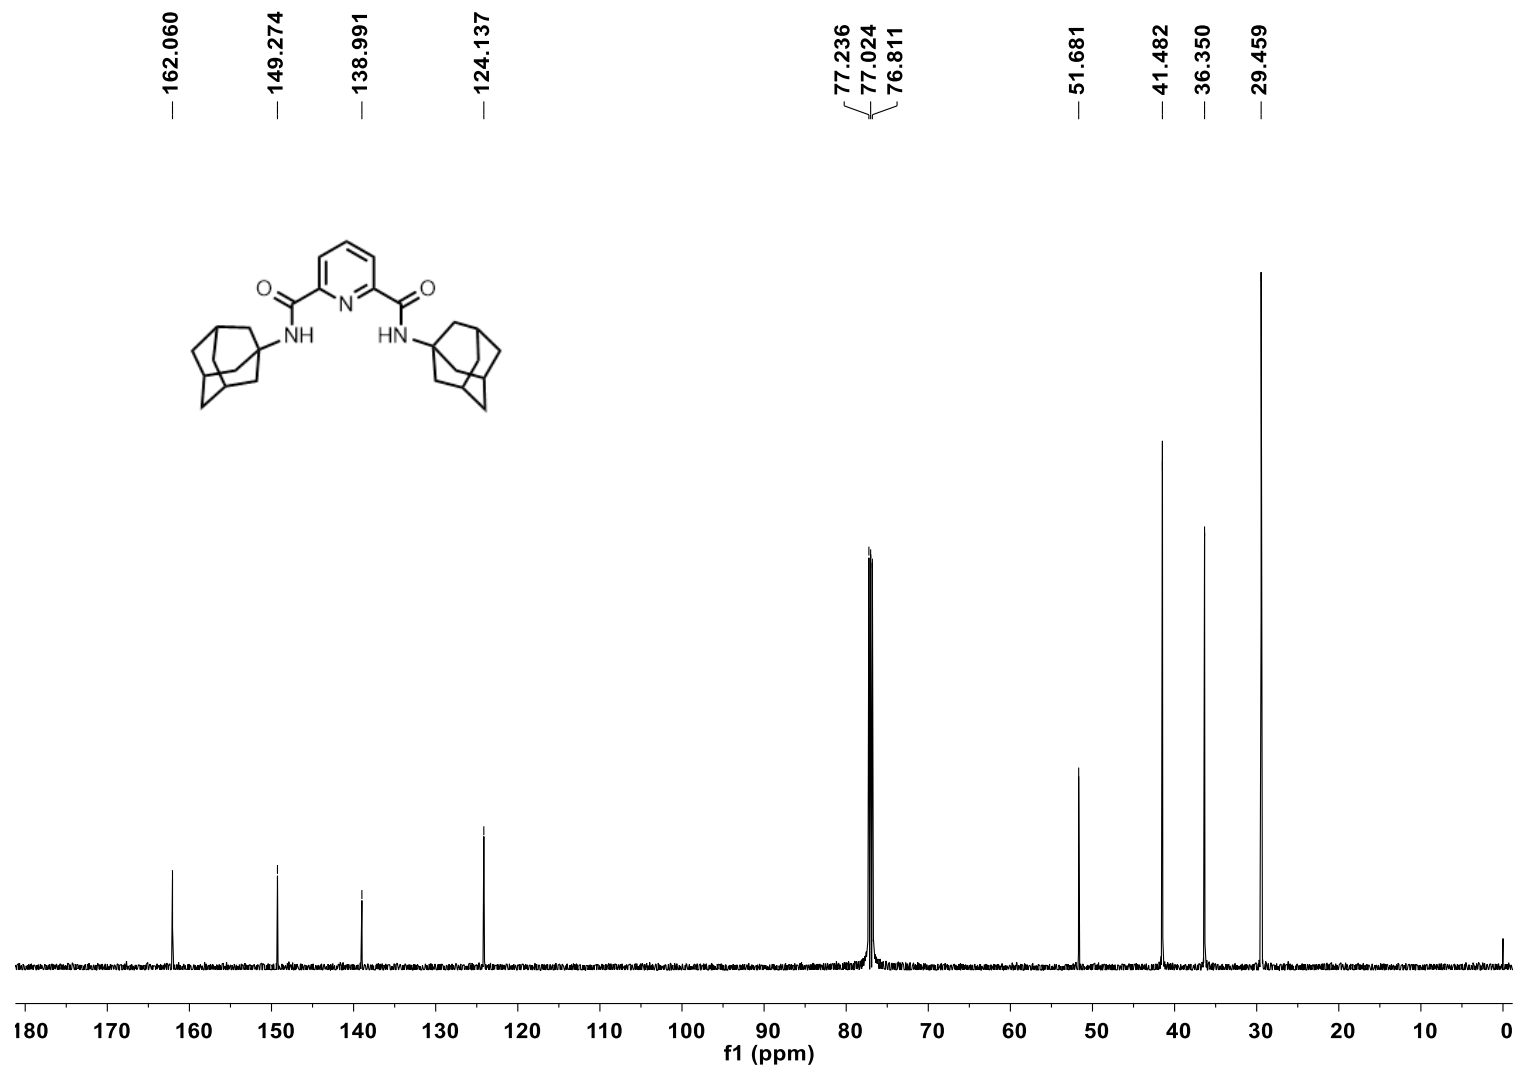

<sup>1</sup>H NMR (600 MHz, CDCl<sub>3</sub>) spectrum of TC3

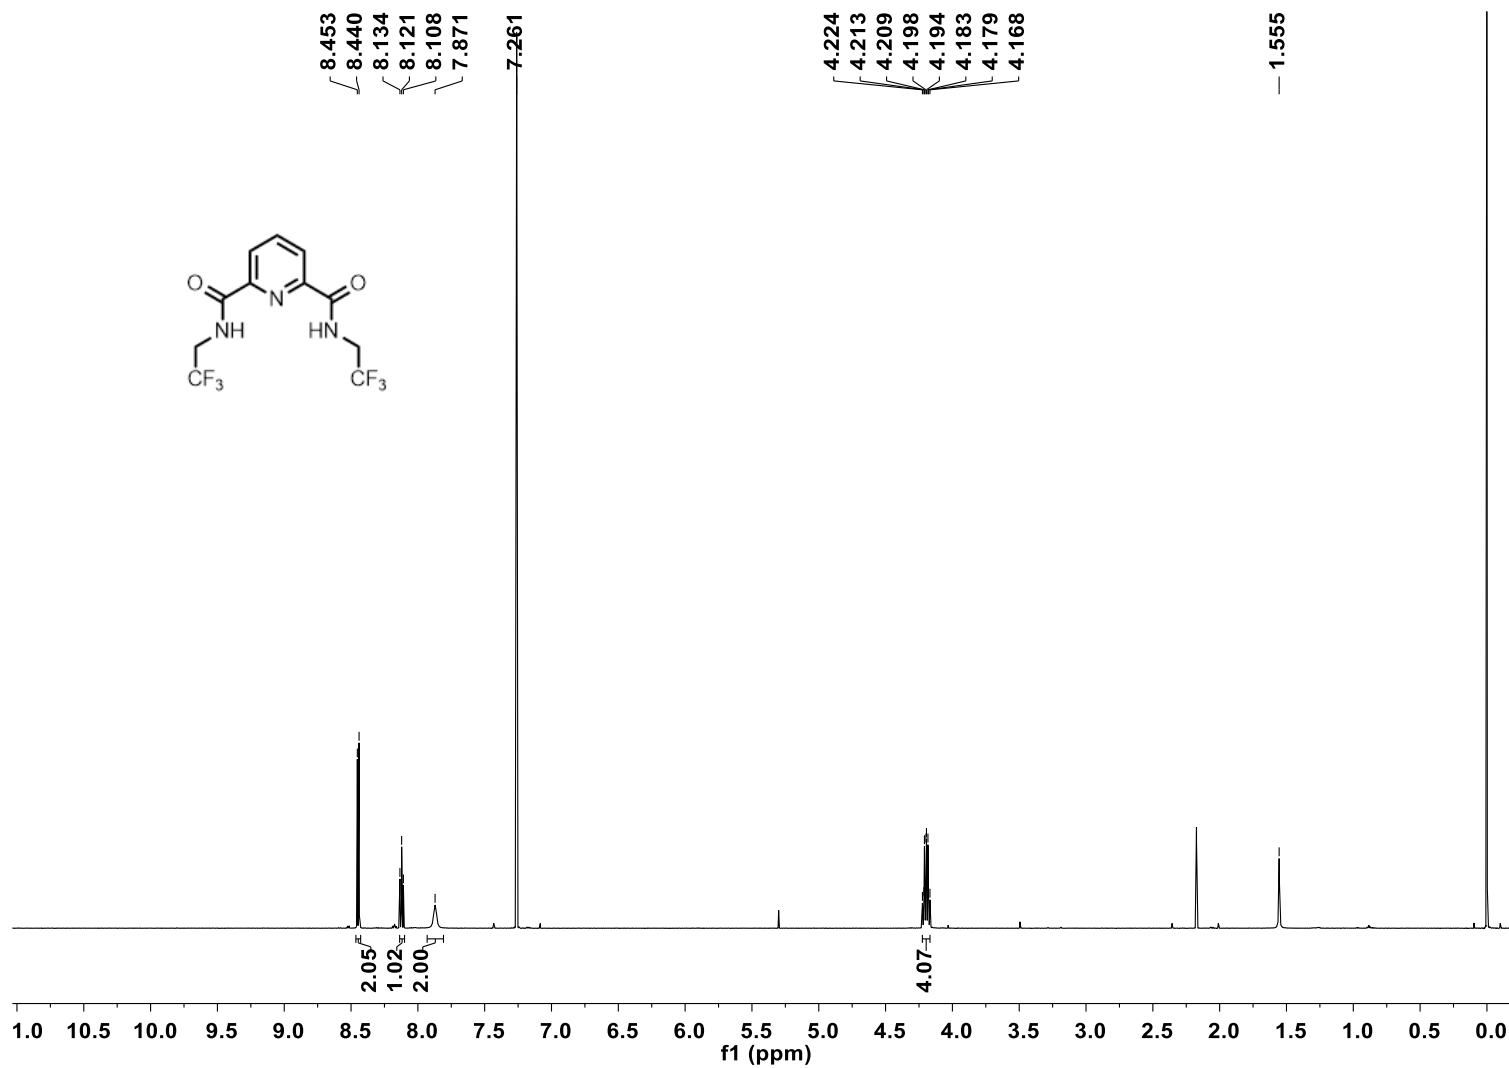

$^{13}\text{C}$  NMR (151 MHz,  $\text{CD}_3\text{OD}$ ) spectrum of TC3

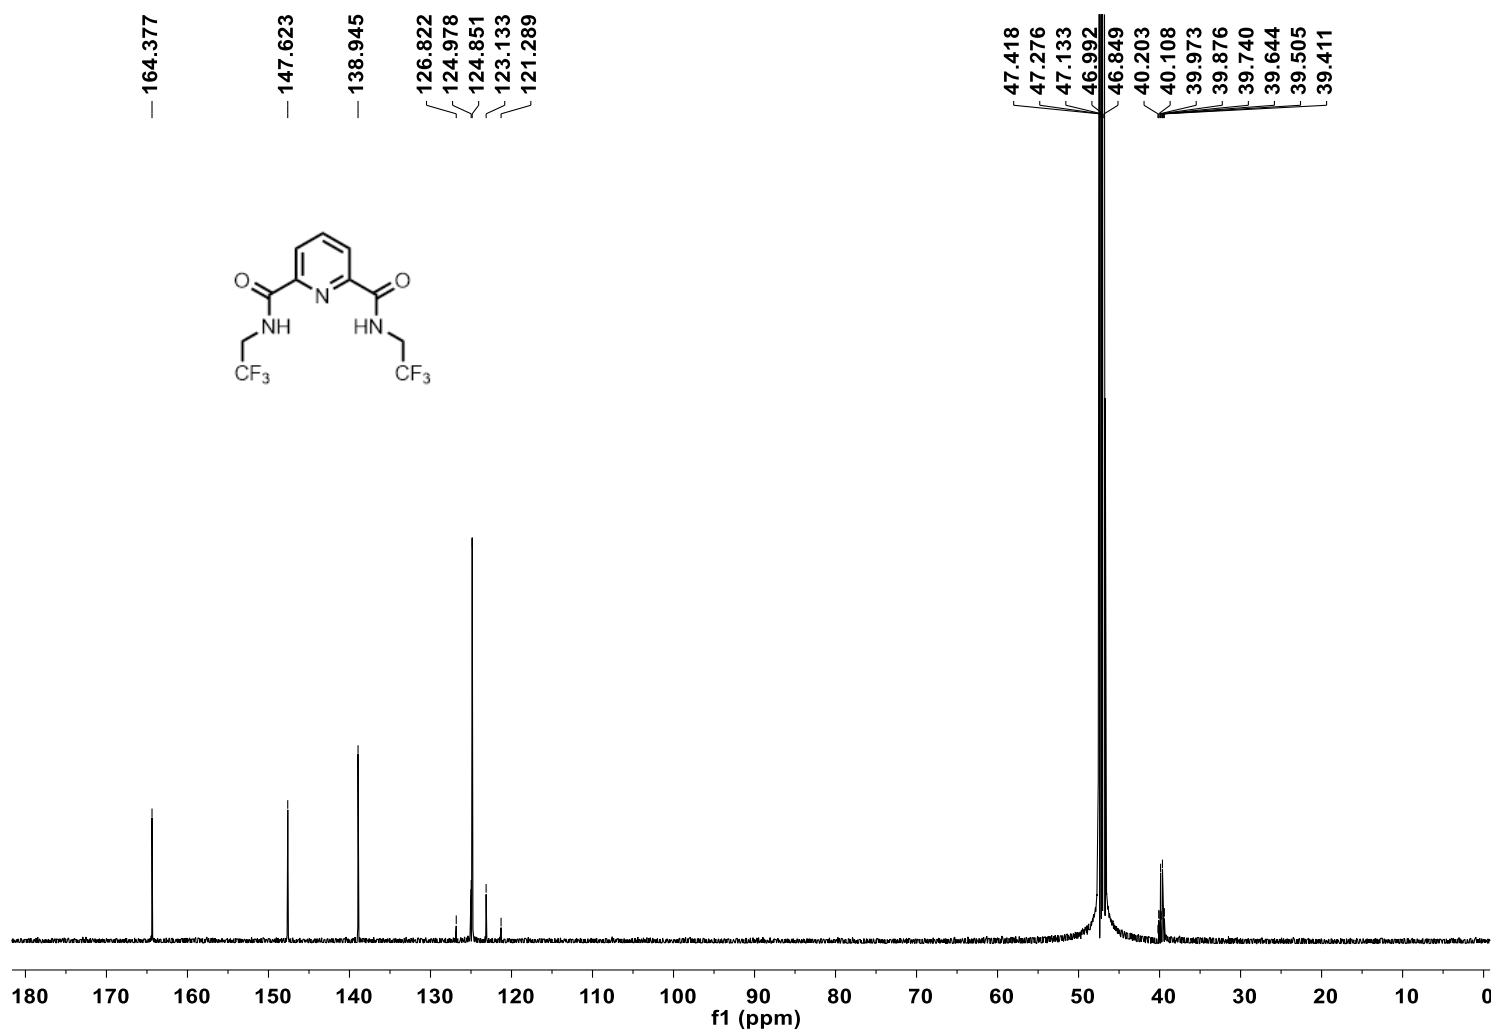

<sup>19</sup>F NMR (376 MHz, CDCl<sub>3</sub>) spectrum of TC3

-74.793

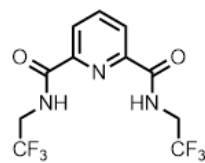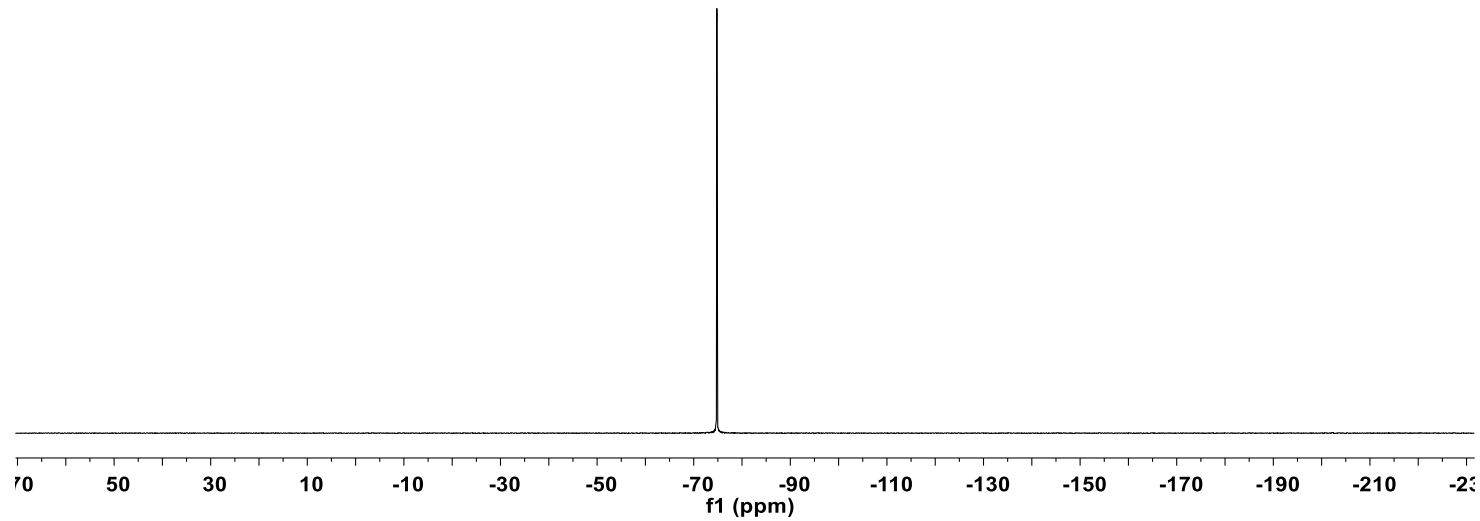

<sup>1</sup>H NMR (600 MHz, Acetone-d<sub>6</sub>) spectrum of TC4

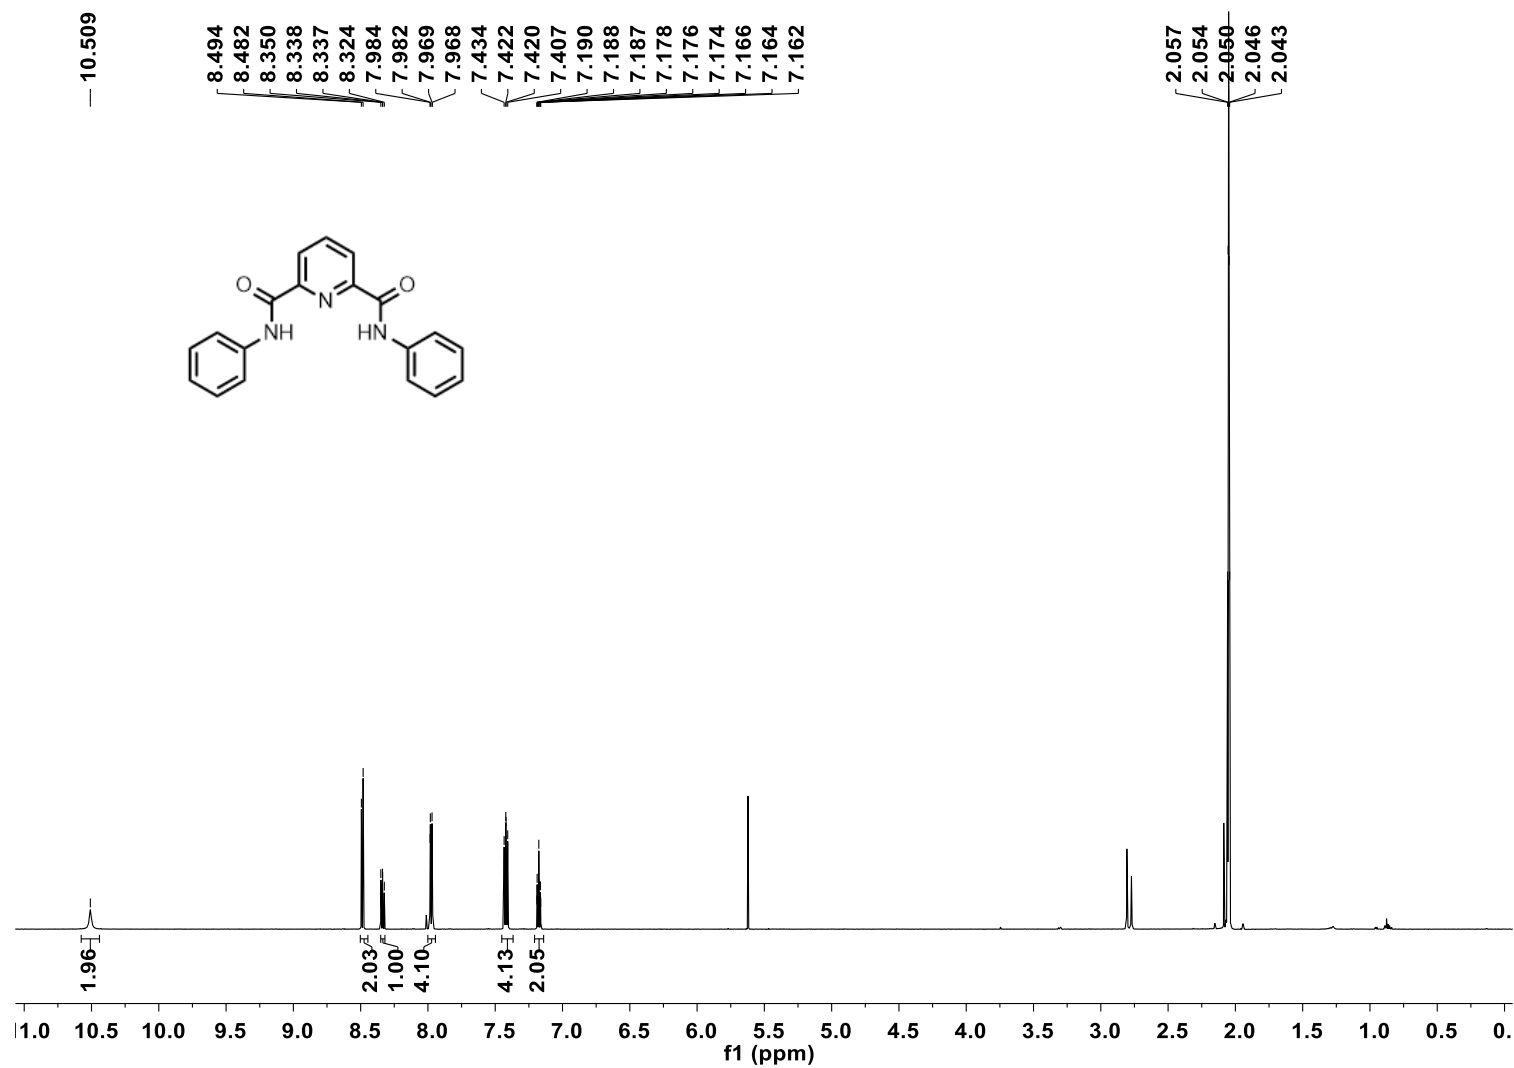

$^{13}\text{C}$  NMR (151 MHz, Acetone- $d_6$ ) spectrum of TC4

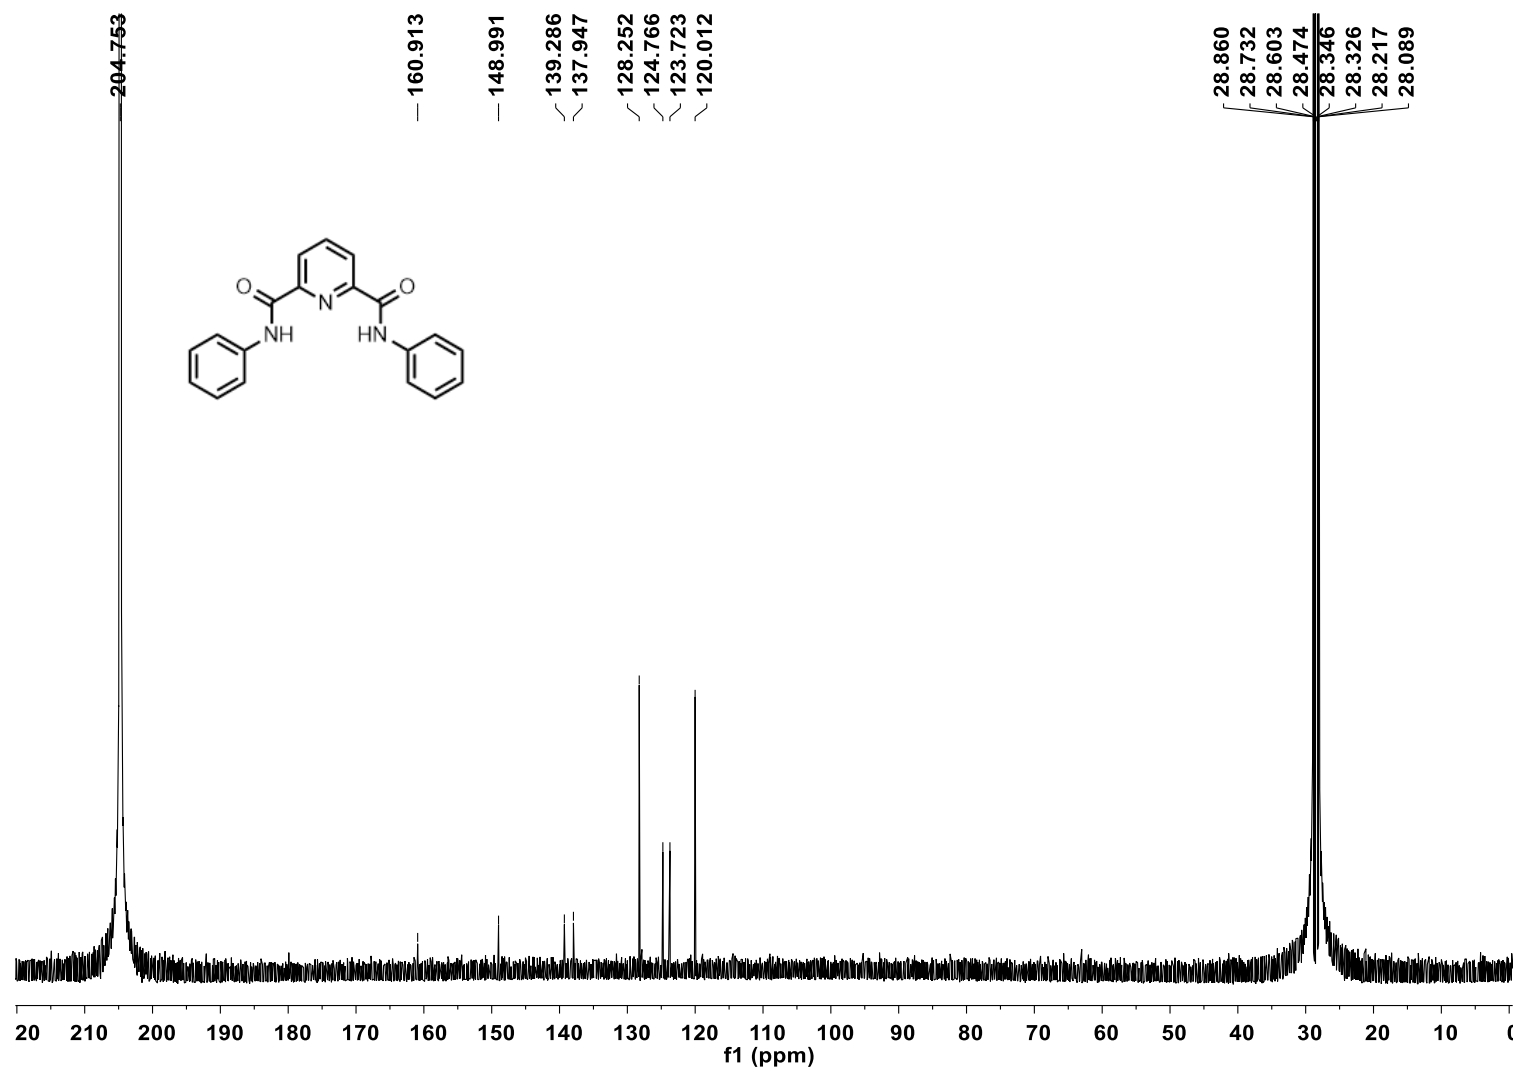

<sup>1</sup>H NMR (600 MHz, Acetone-d<sub>6</sub>) spectrum of TC5

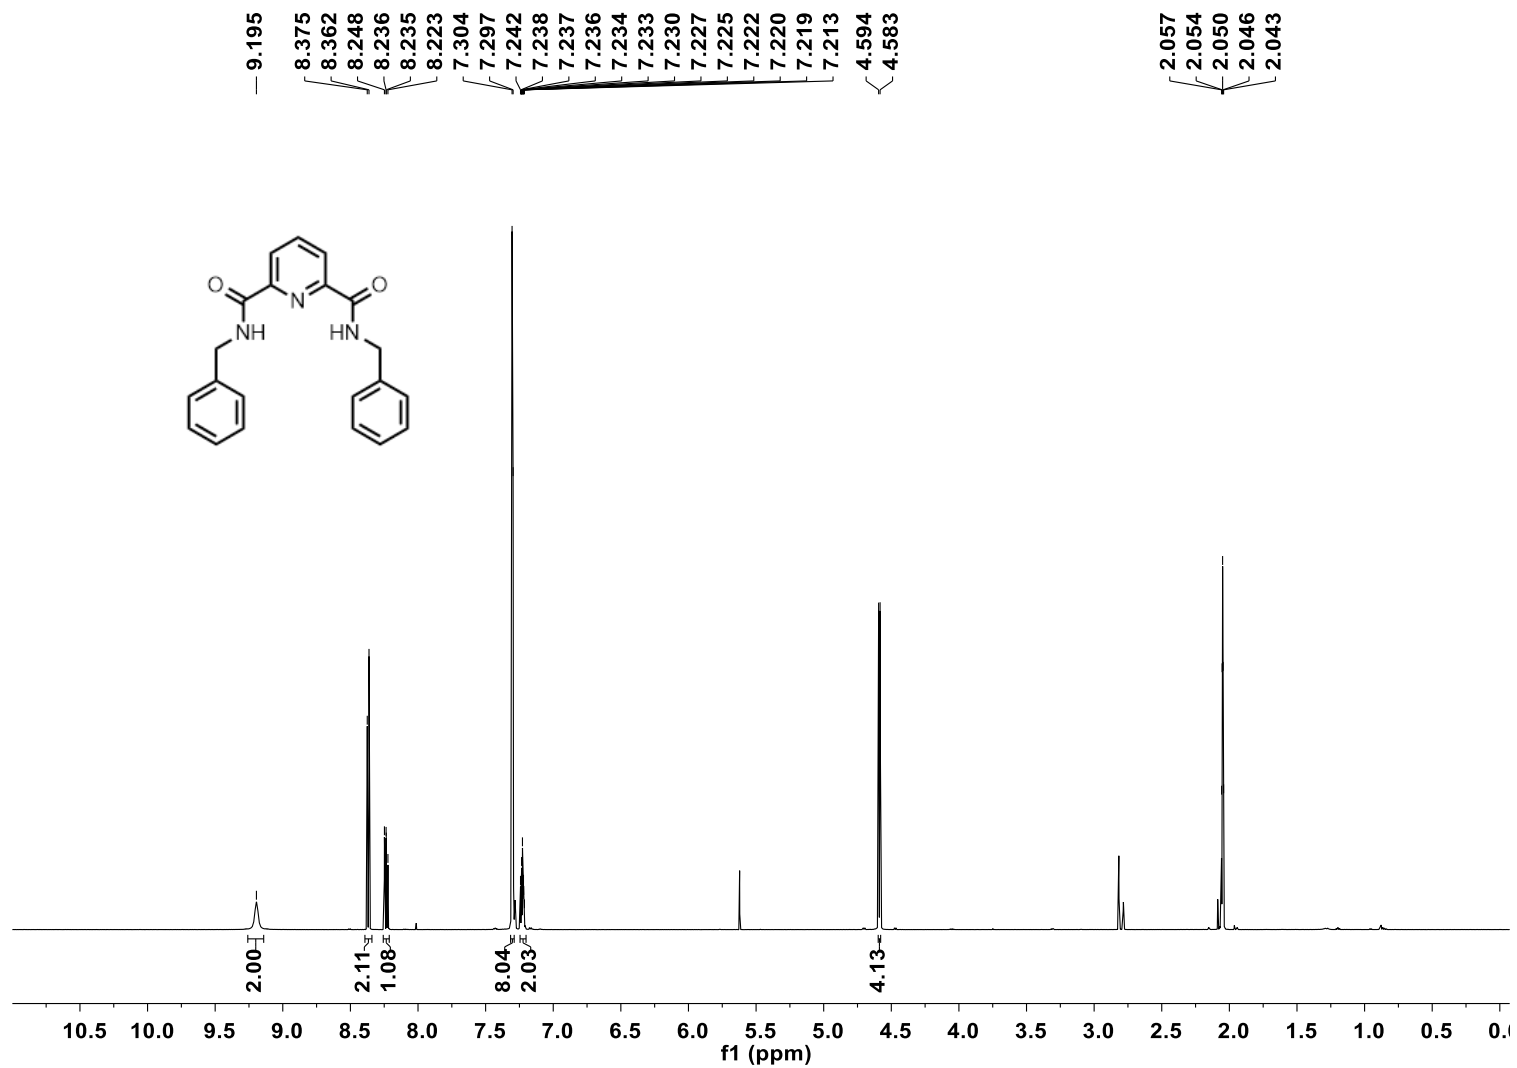

<sup>13</sup>C NMR (151 MHz, Acetone-d<sub>6</sub>) spectrum of TC5

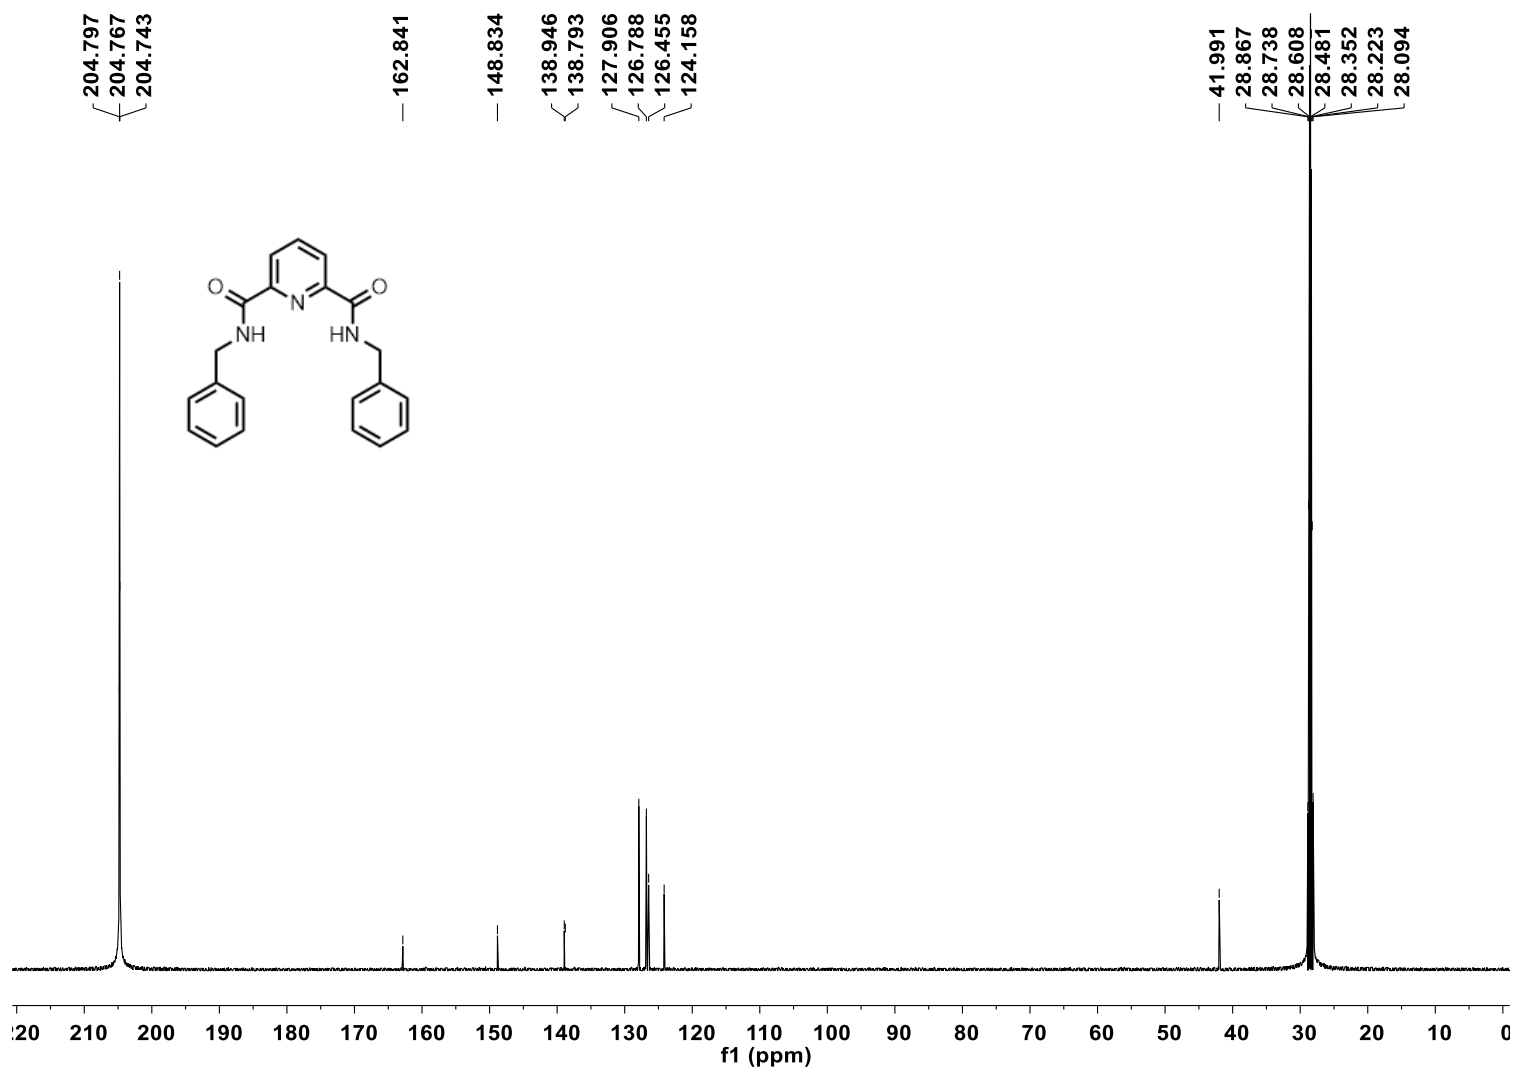



<sup>1</sup>H NMR (600 MHz, Acetone-d<sub>6</sub>) spectrum of TC6

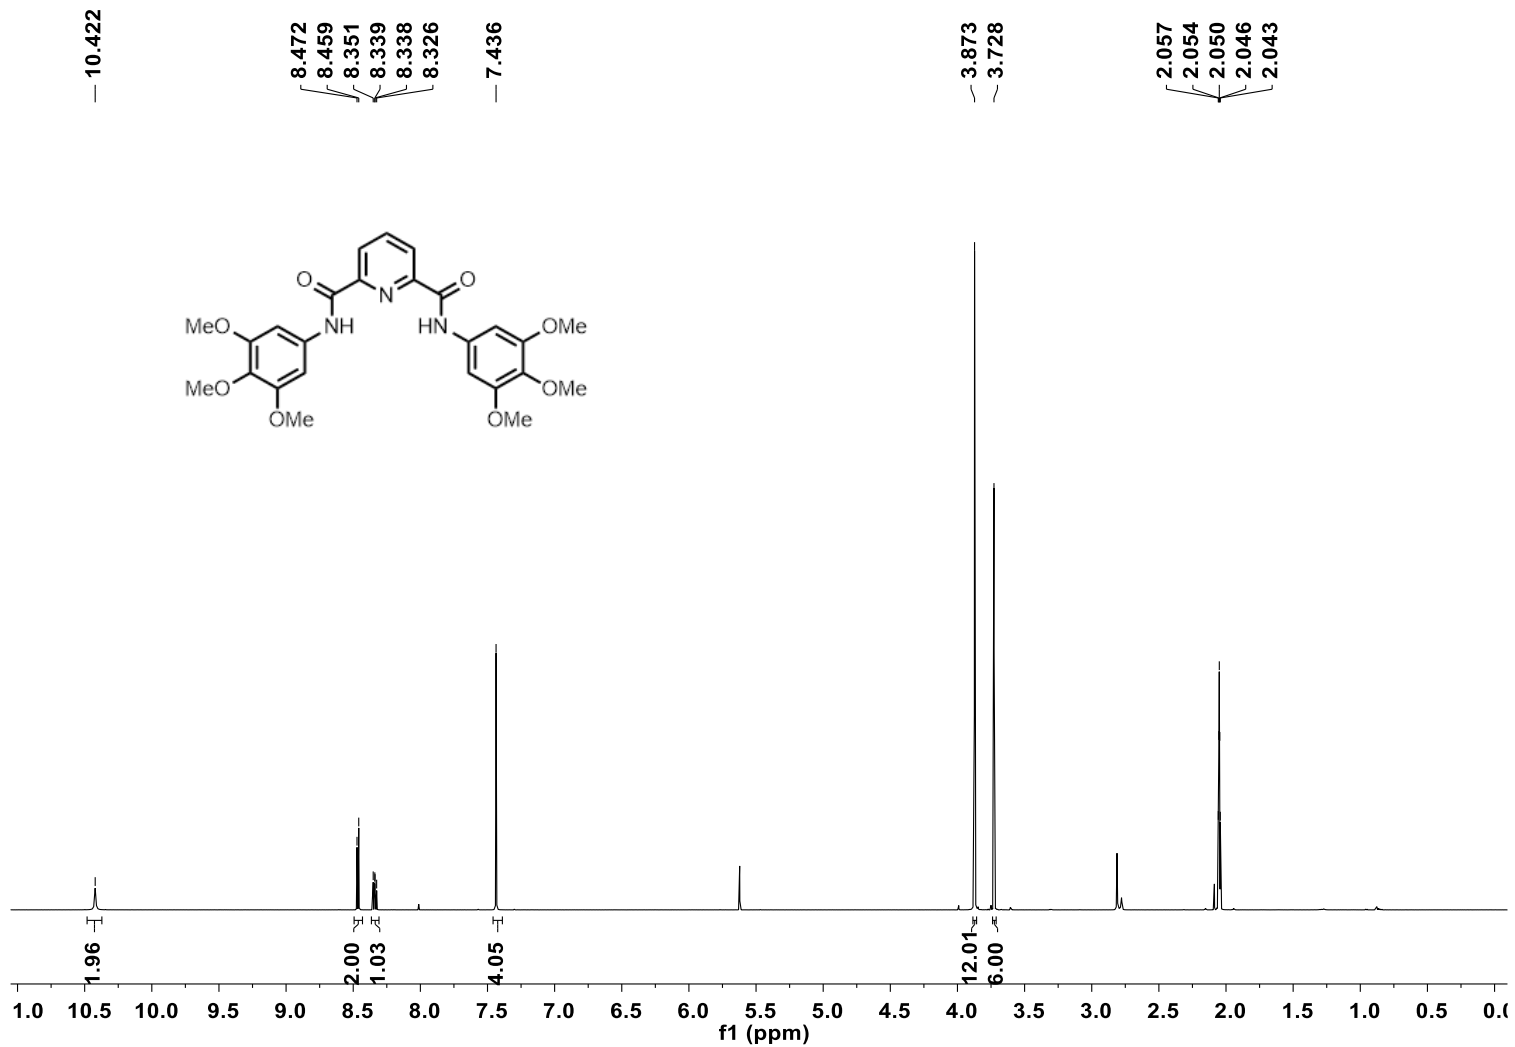

<sup>13</sup>C NMR (151 MHz, Acetone-d<sub>6</sub>) spectrum of TC6

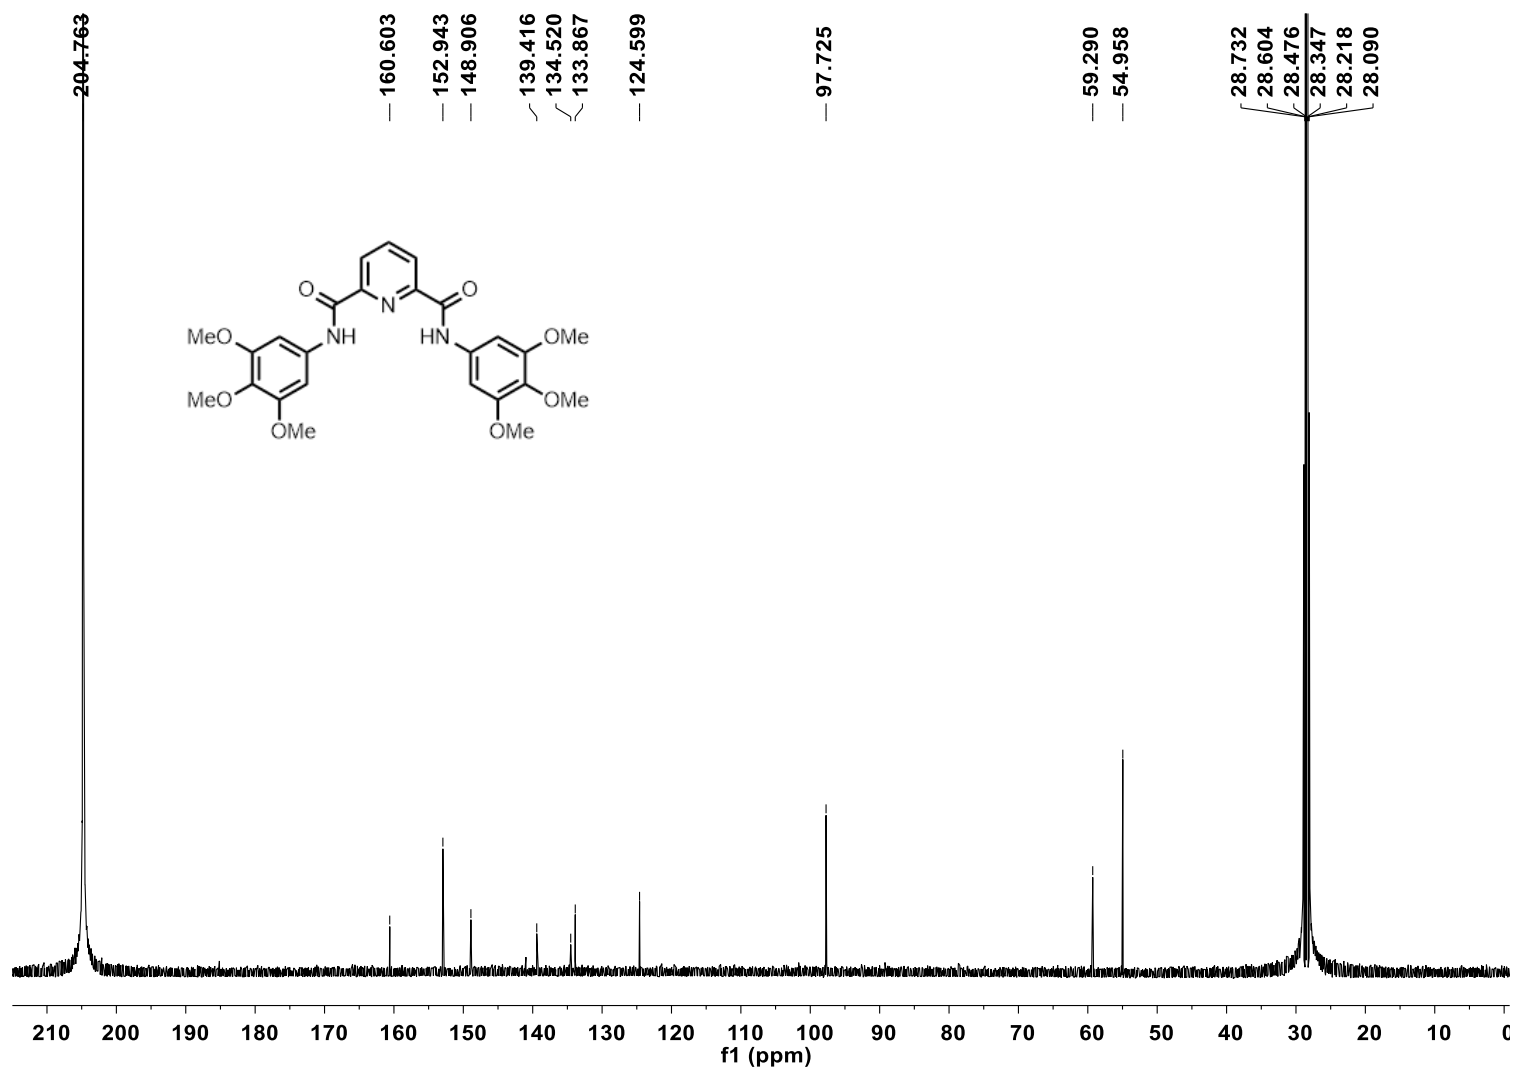

<sup>1</sup>H NMR (600 MHz, Acetone-*d*<sub>6</sub>) spectrum of TC7

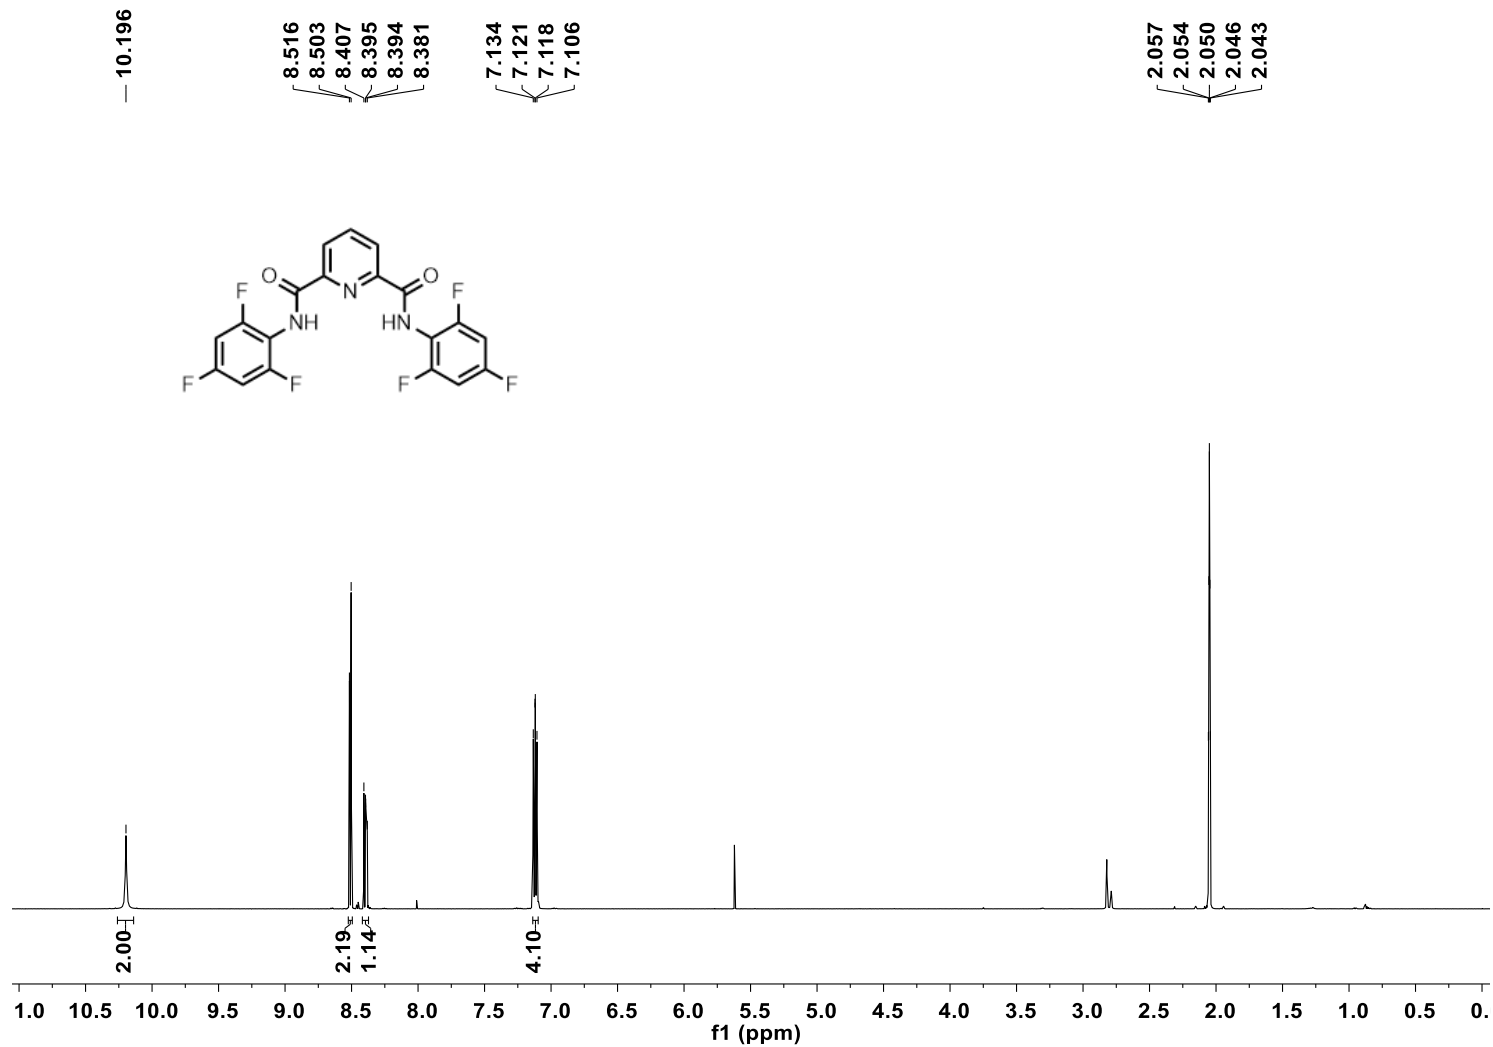

<sup>13</sup>C NMR (151 MHz, Acetone-*d*<sub>6</sub>) spectrum of TC7

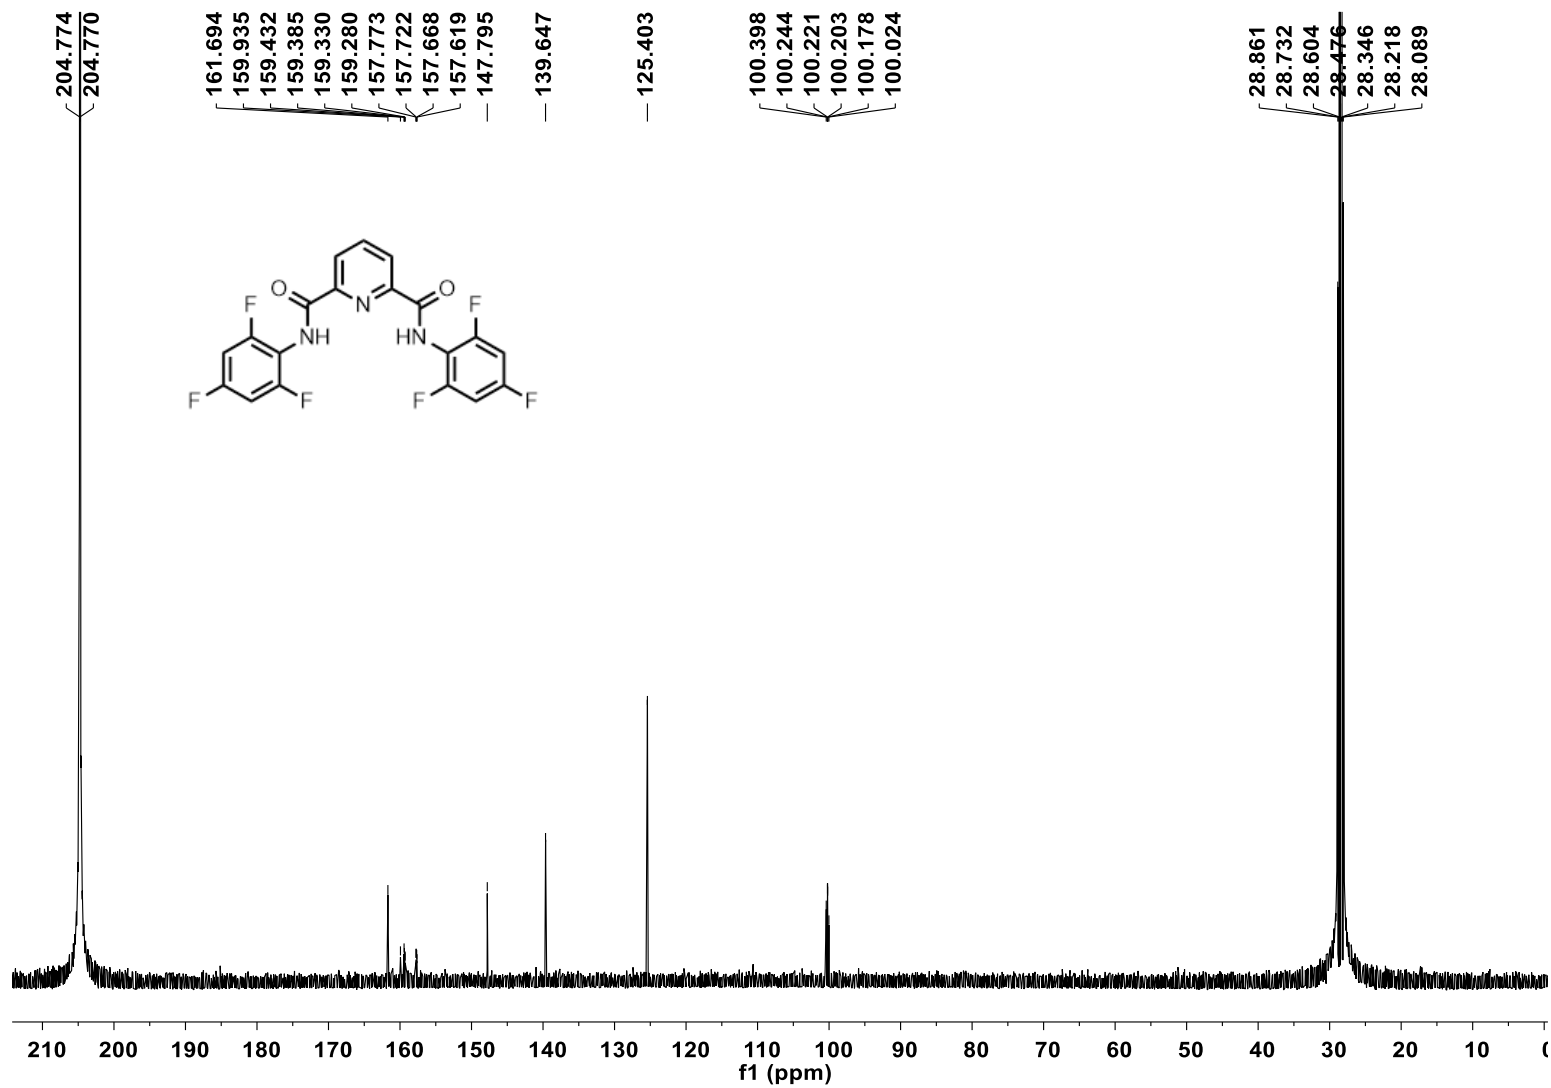

<sup>19</sup>F NMR (376 MHz, Acetone-*d*<sub>6</sub>) spectrum of TC7

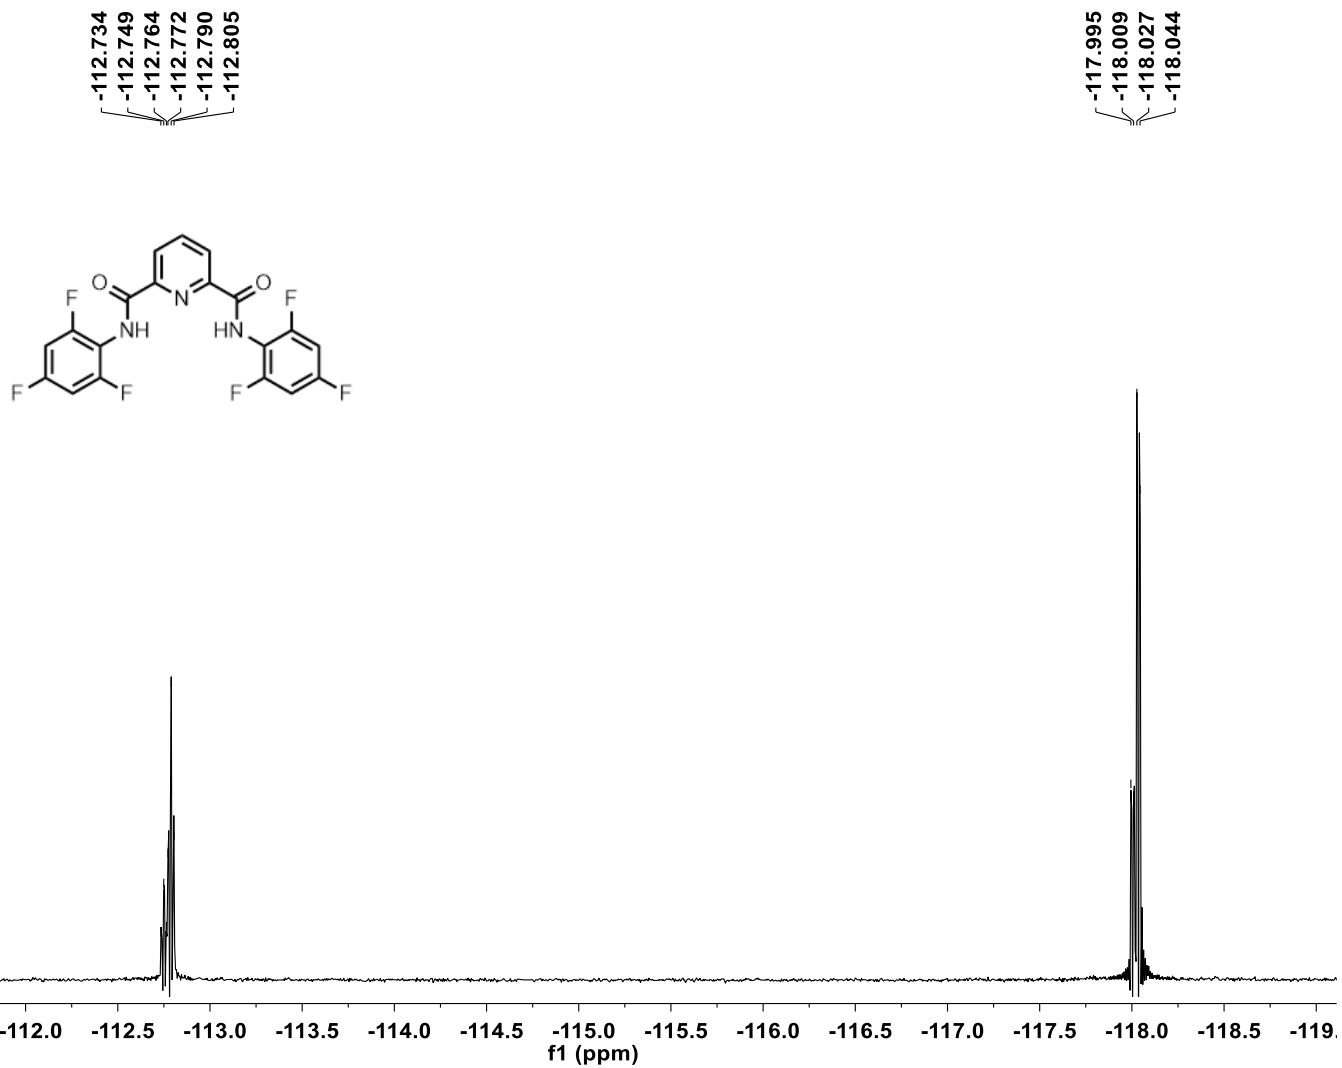

<sup>1</sup>H NMR (600 MHz, Acetone-d<sub>6</sub>) spectrum of TC8

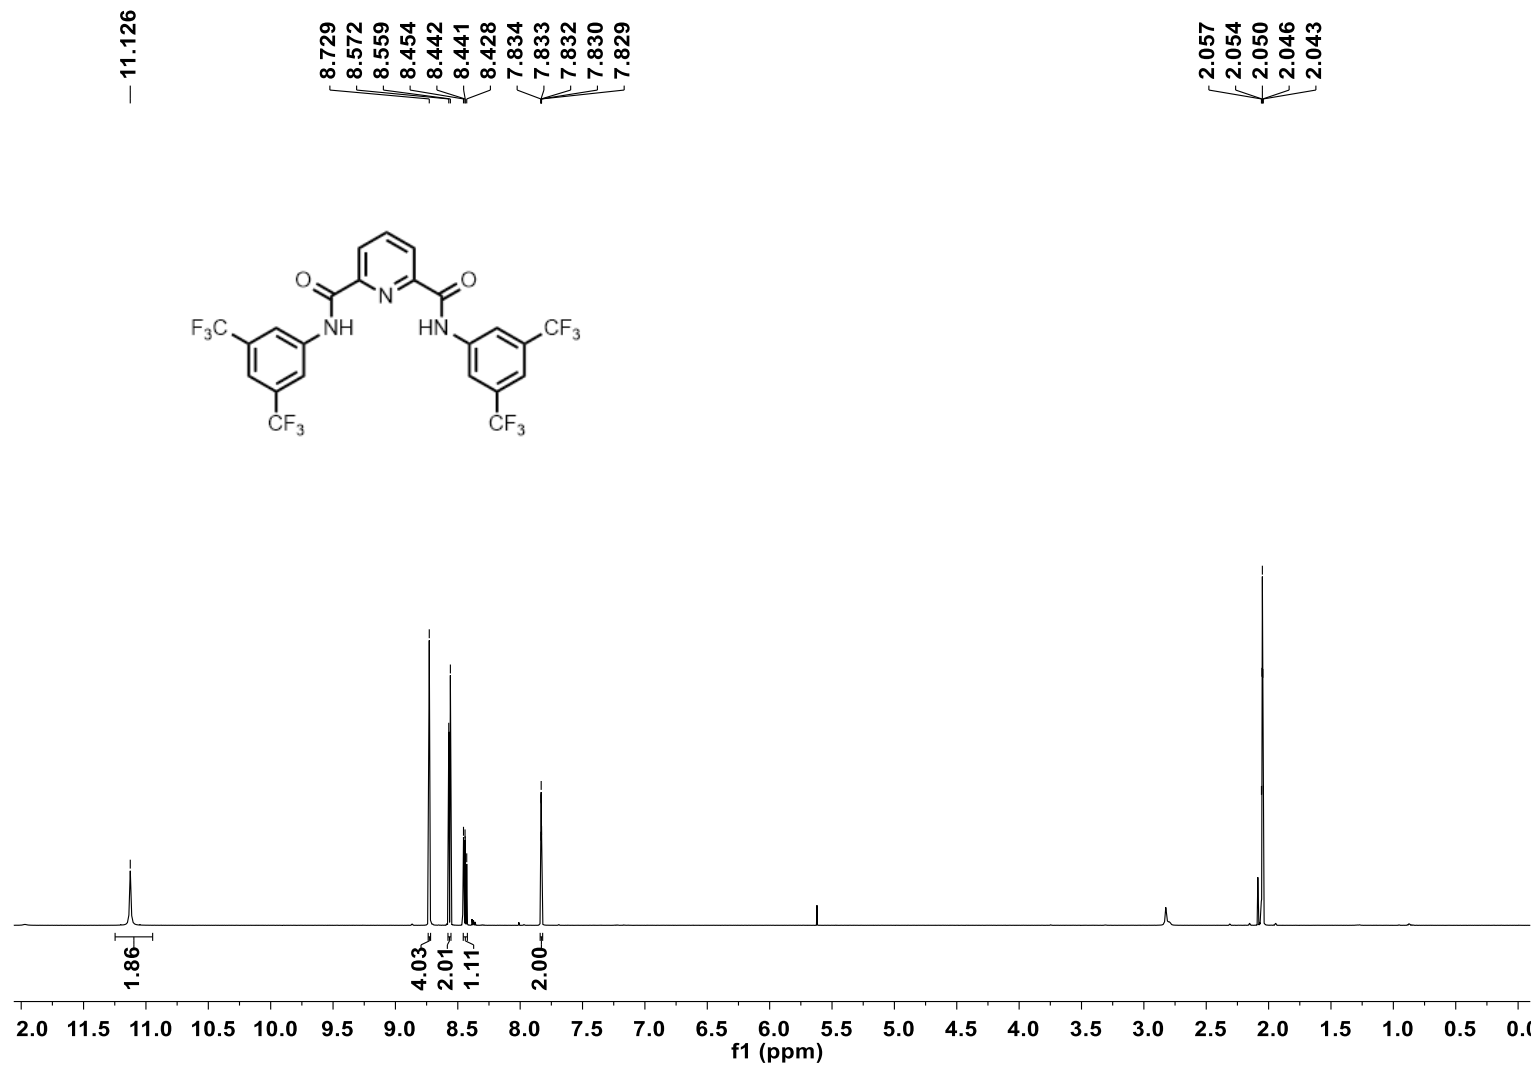

<sup>13</sup>C NMR (151 MHz, Acetone-*d*<sub>6</sub>) spectrum of TC8

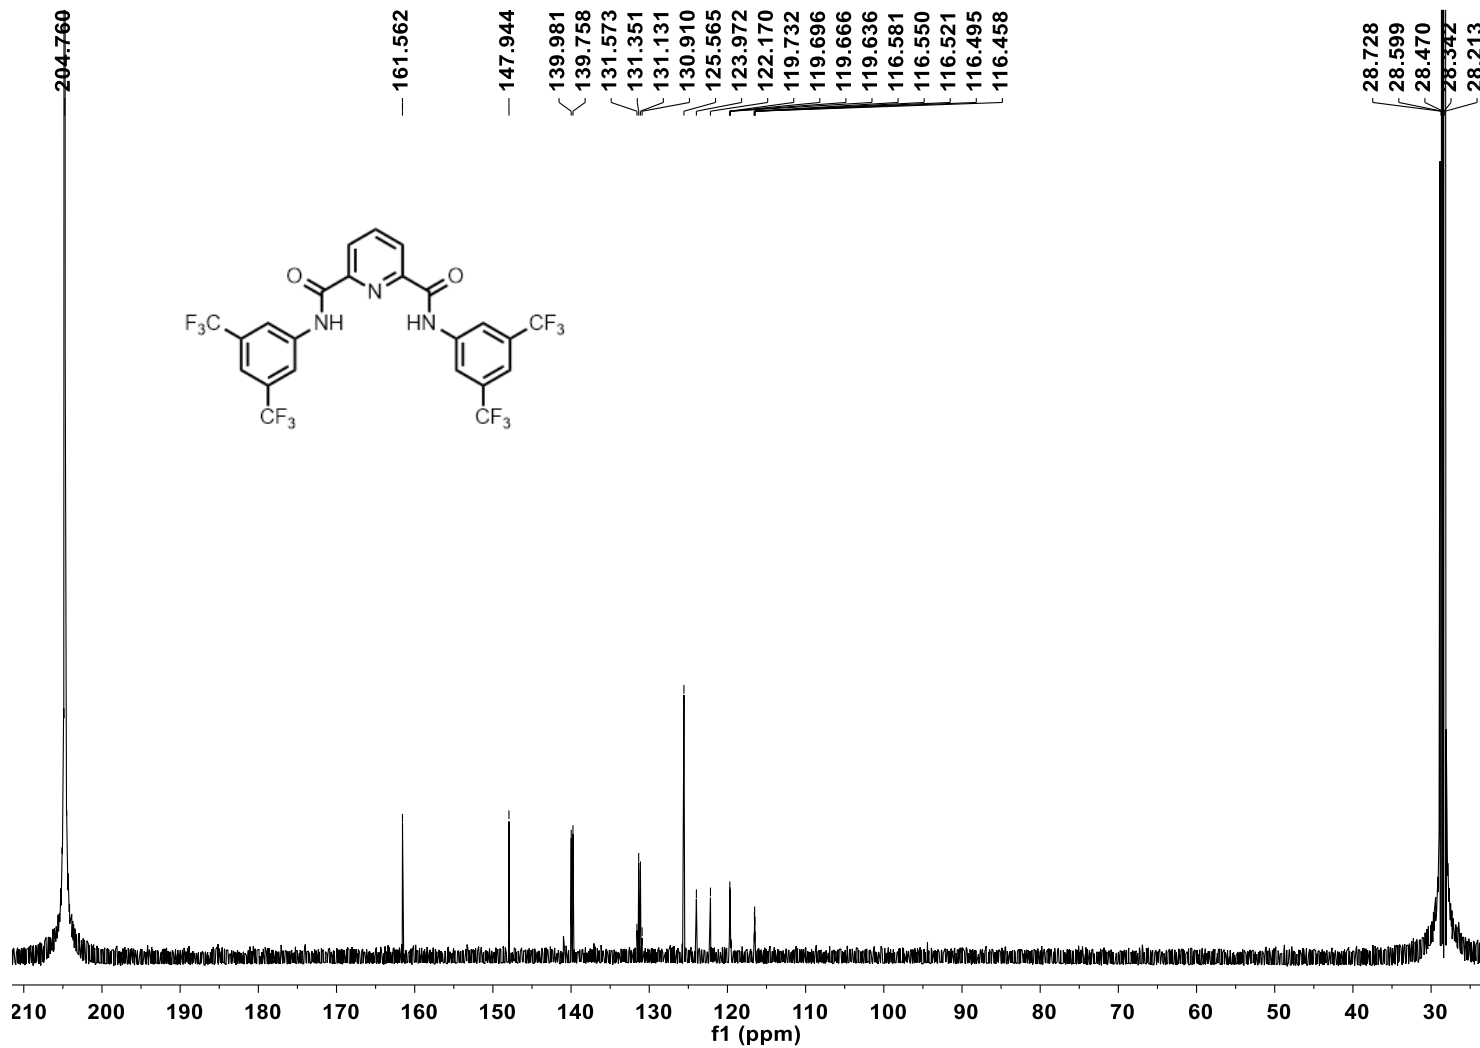

<sup>19</sup>F NMR (376 MHz, Acetone-*d*<sub>6</sub>) spectrum of TC8

-61.039

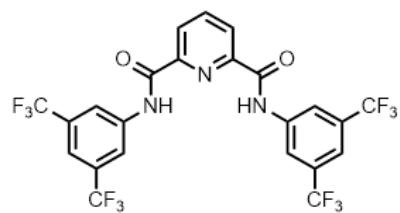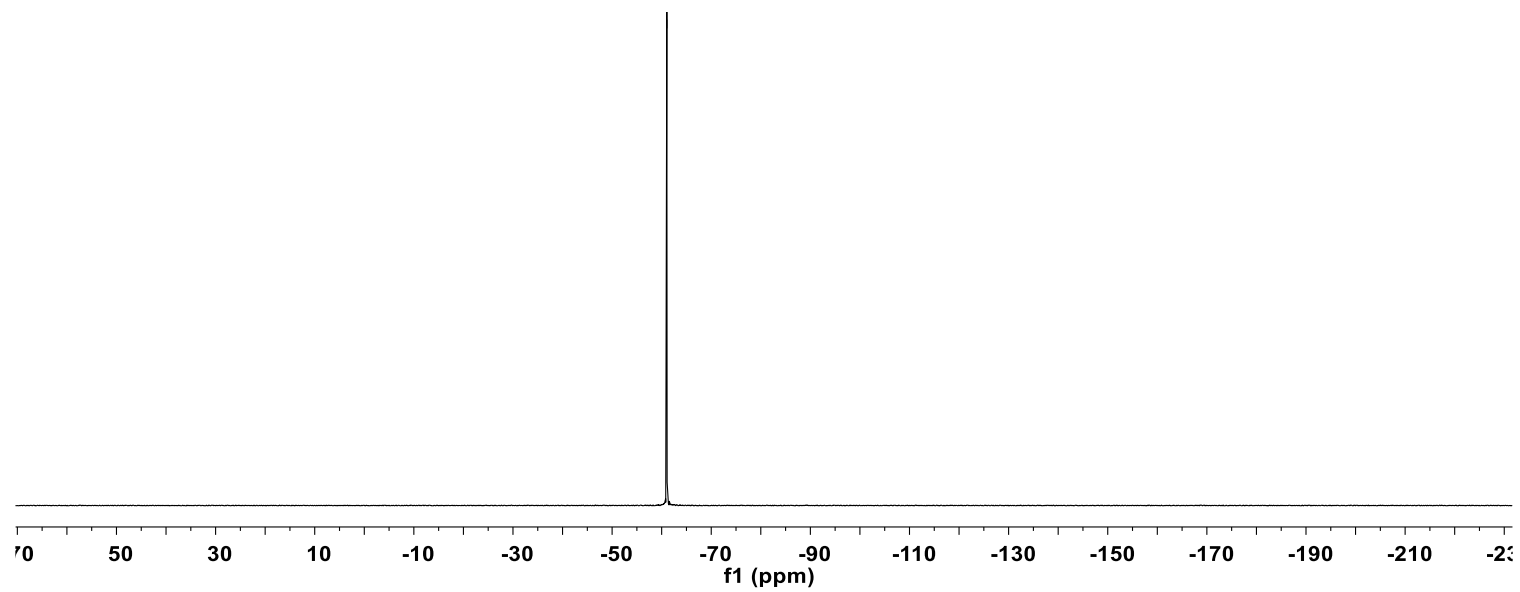



<sup>1</sup>H NMR (600 MHz, Acetone-*d*<sub>6</sub>) spectrum of TC9

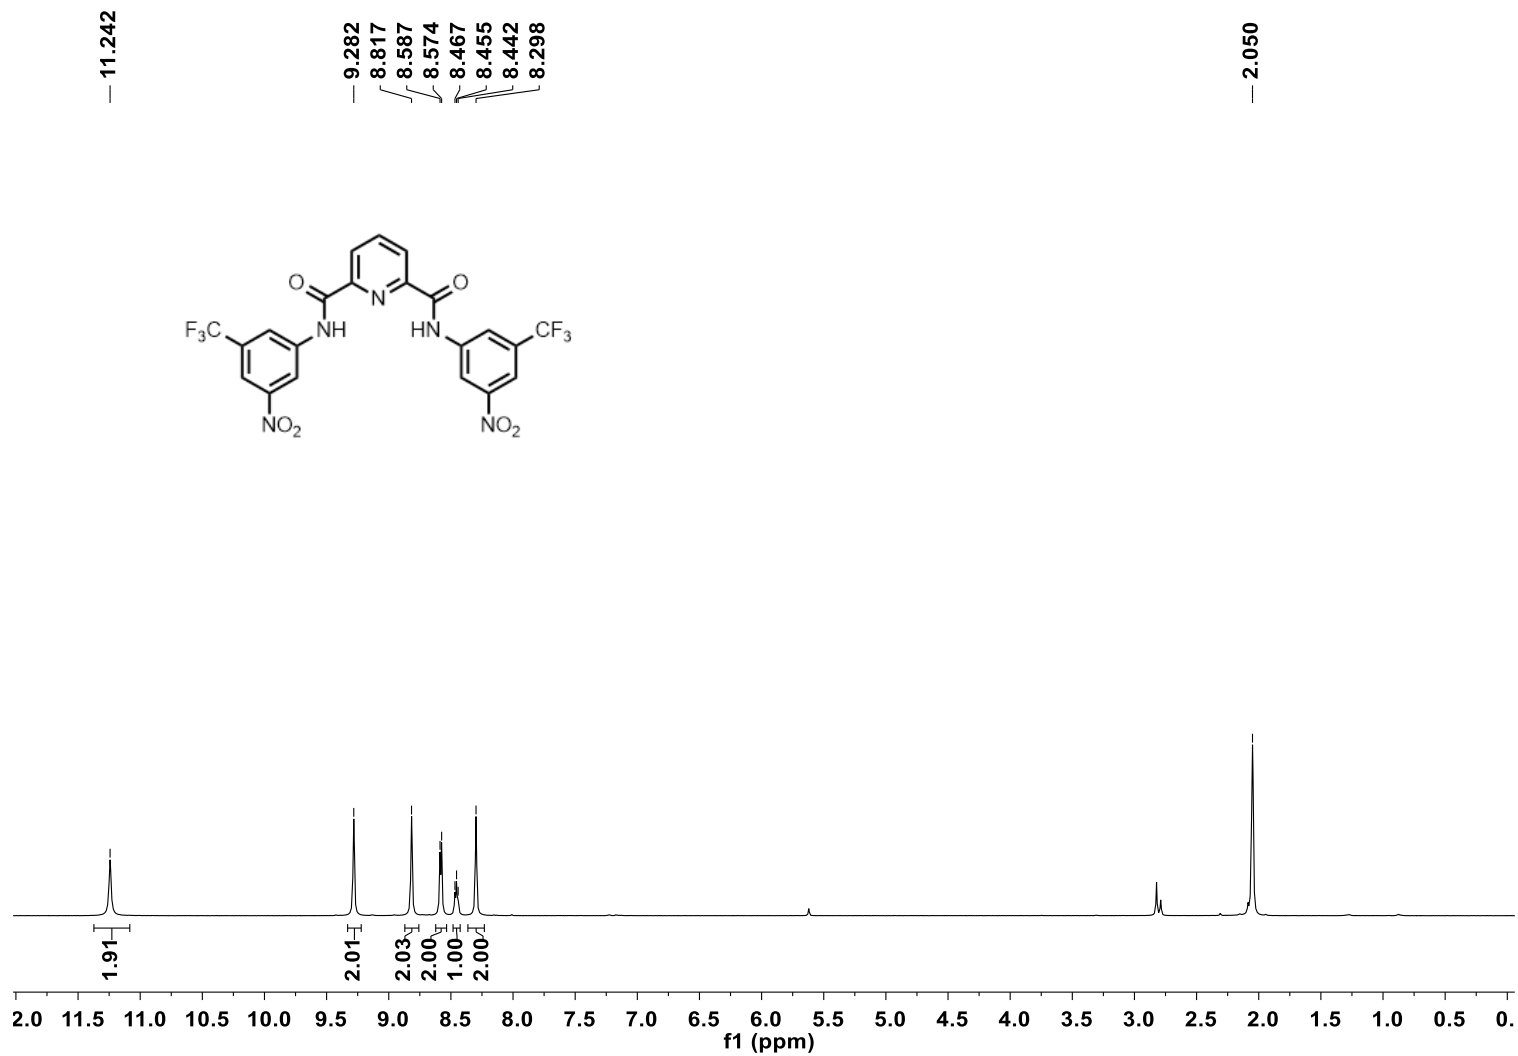

<sup>13</sup>C NMR (151 MHz, Acetone-*d*<sub>6</sub>) spectrum of TC9

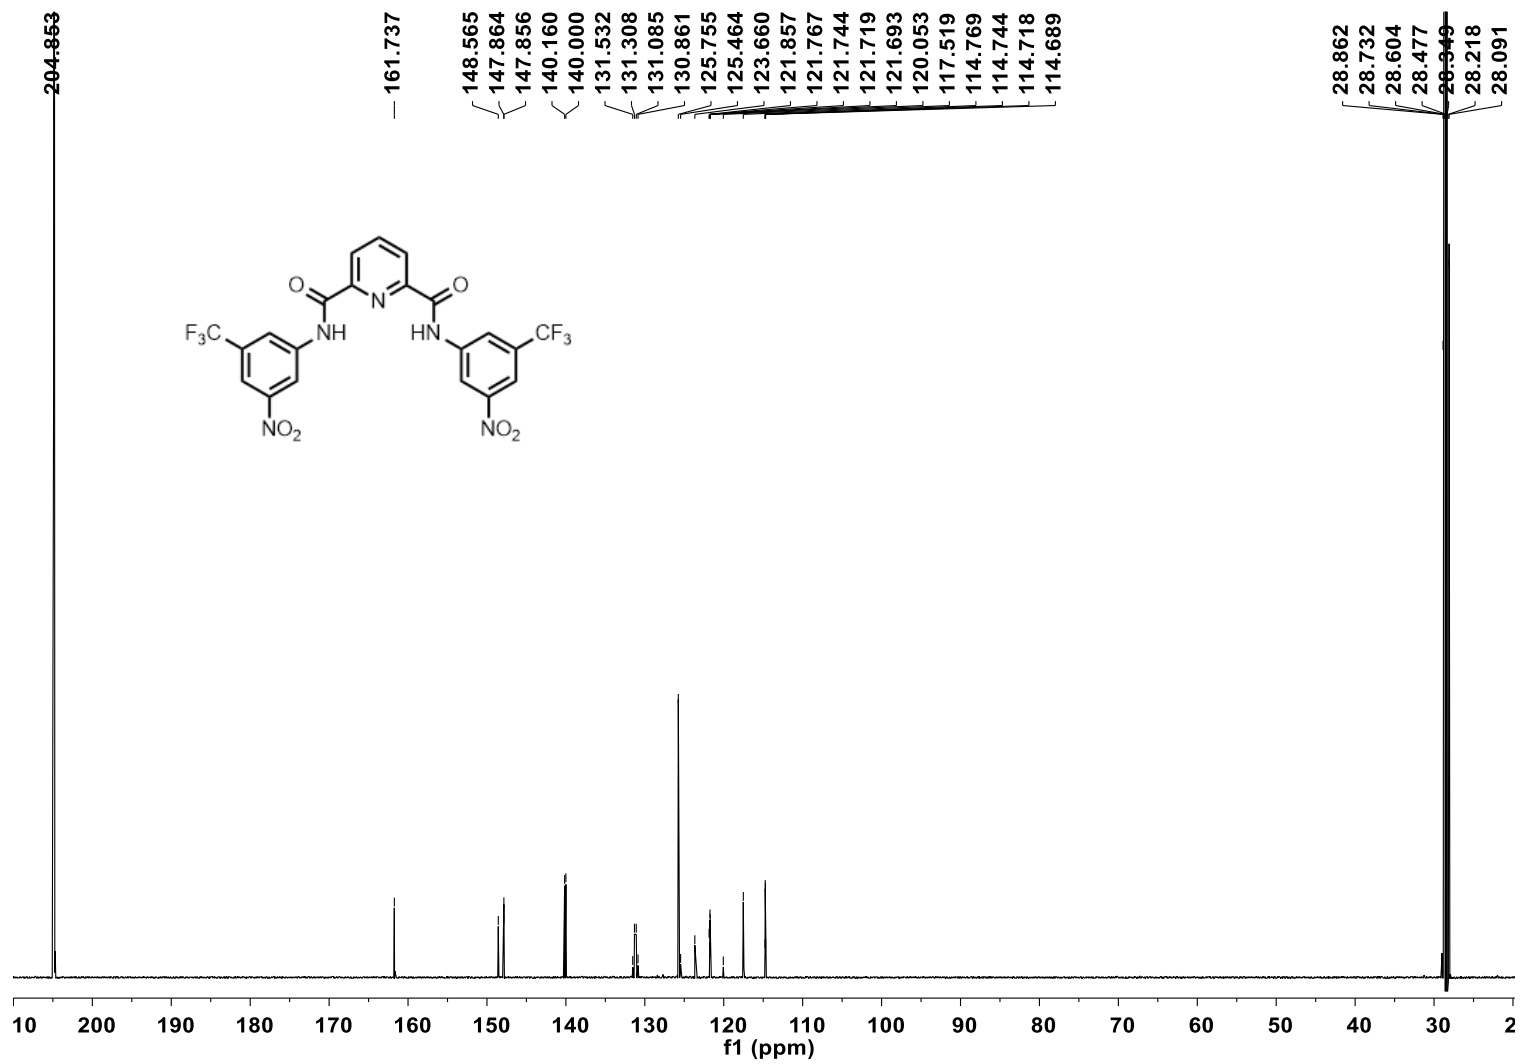

<sup>19</sup>F NMR (376 MHz, Acetone-*d*<sub>6</sub>) spectrum of TC9

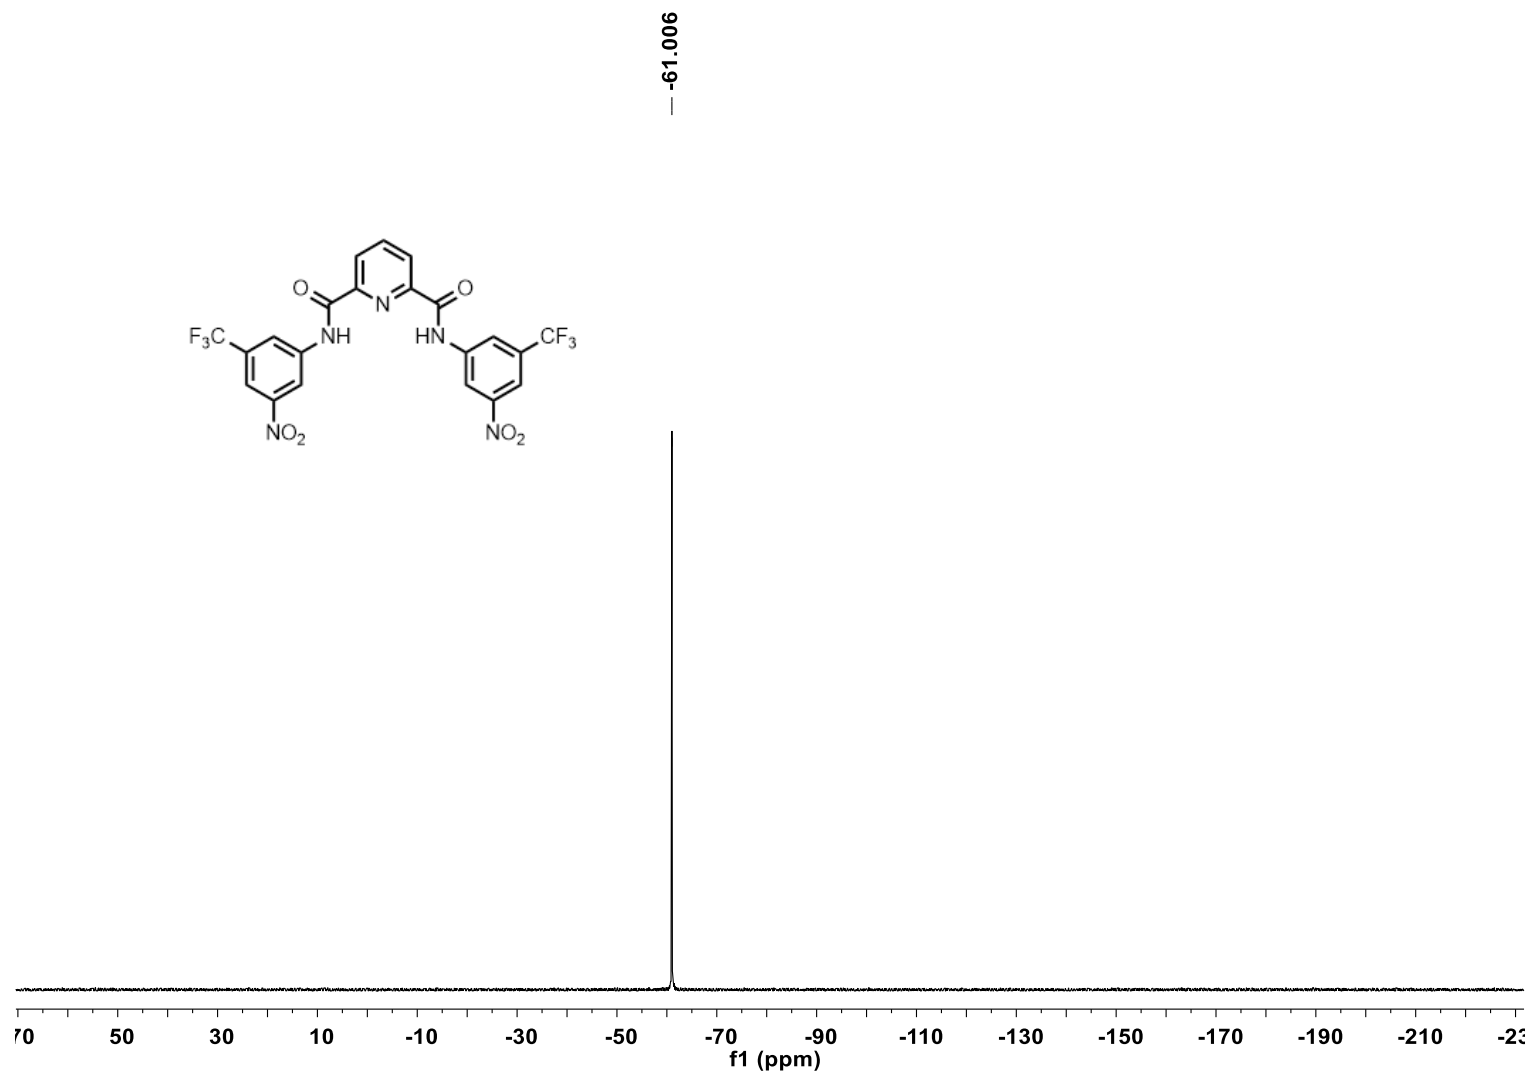

$^1\text{H}$  NMR (600 MHz, Acetone- $d_6$ ) spectrum of TC10

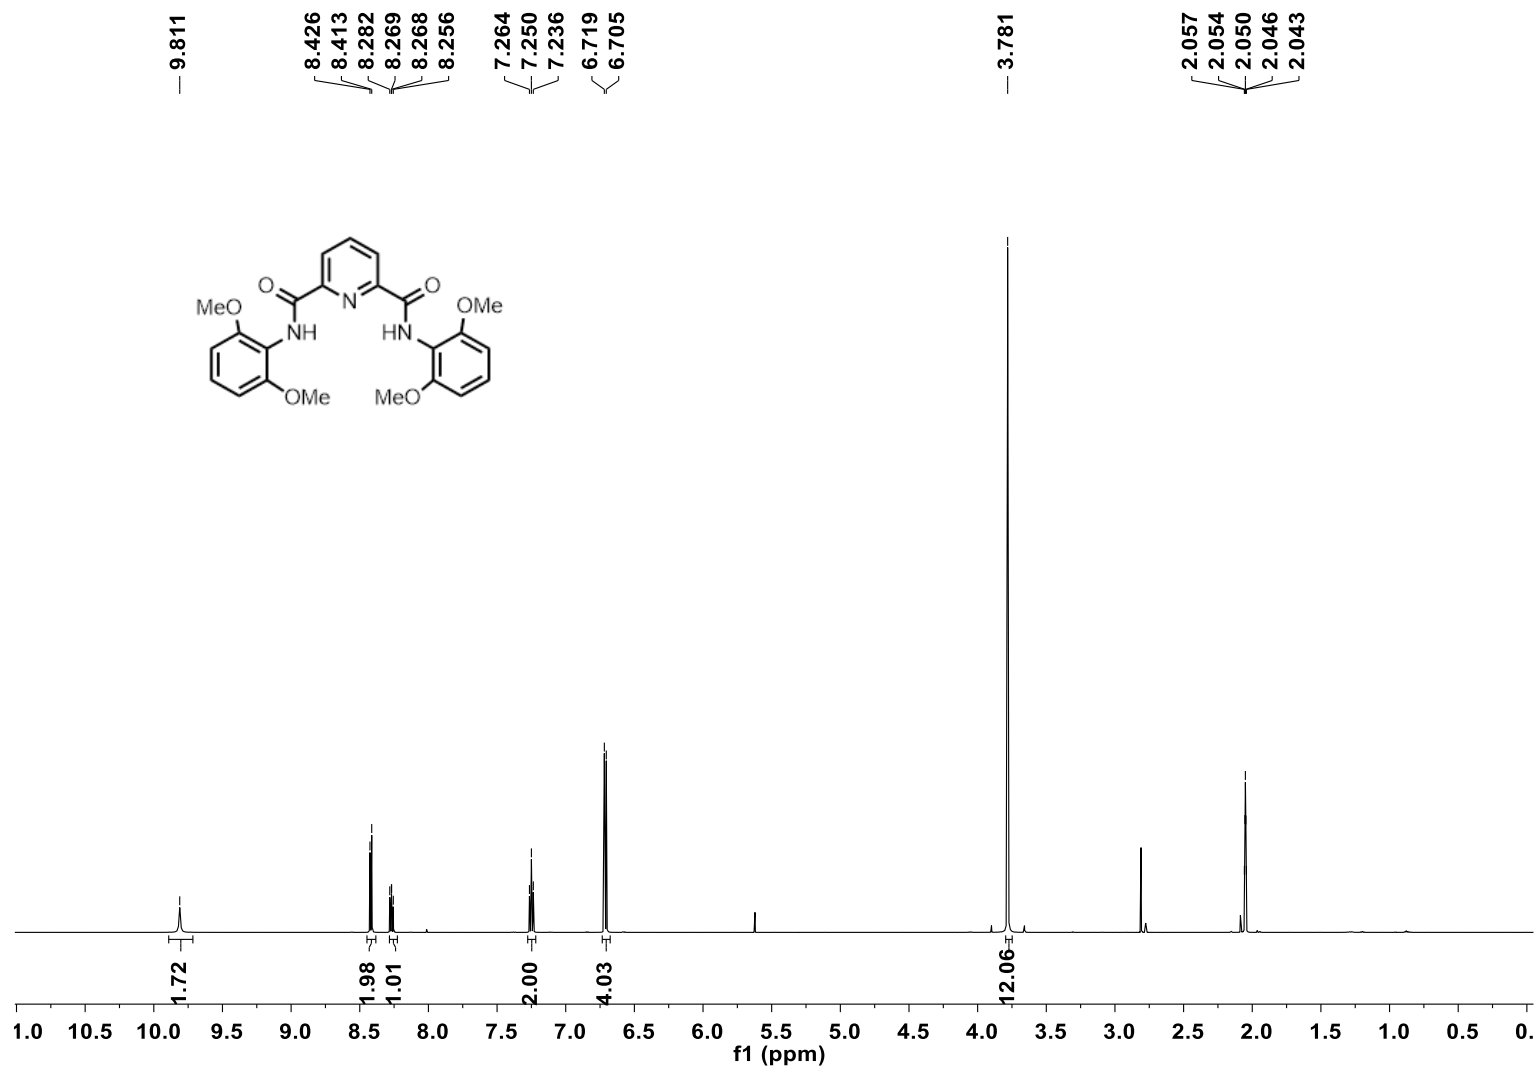

<sup>13</sup>C NMR (151 MHz, Acetone-*d*<sub>6</sub>) spectrum of TC10

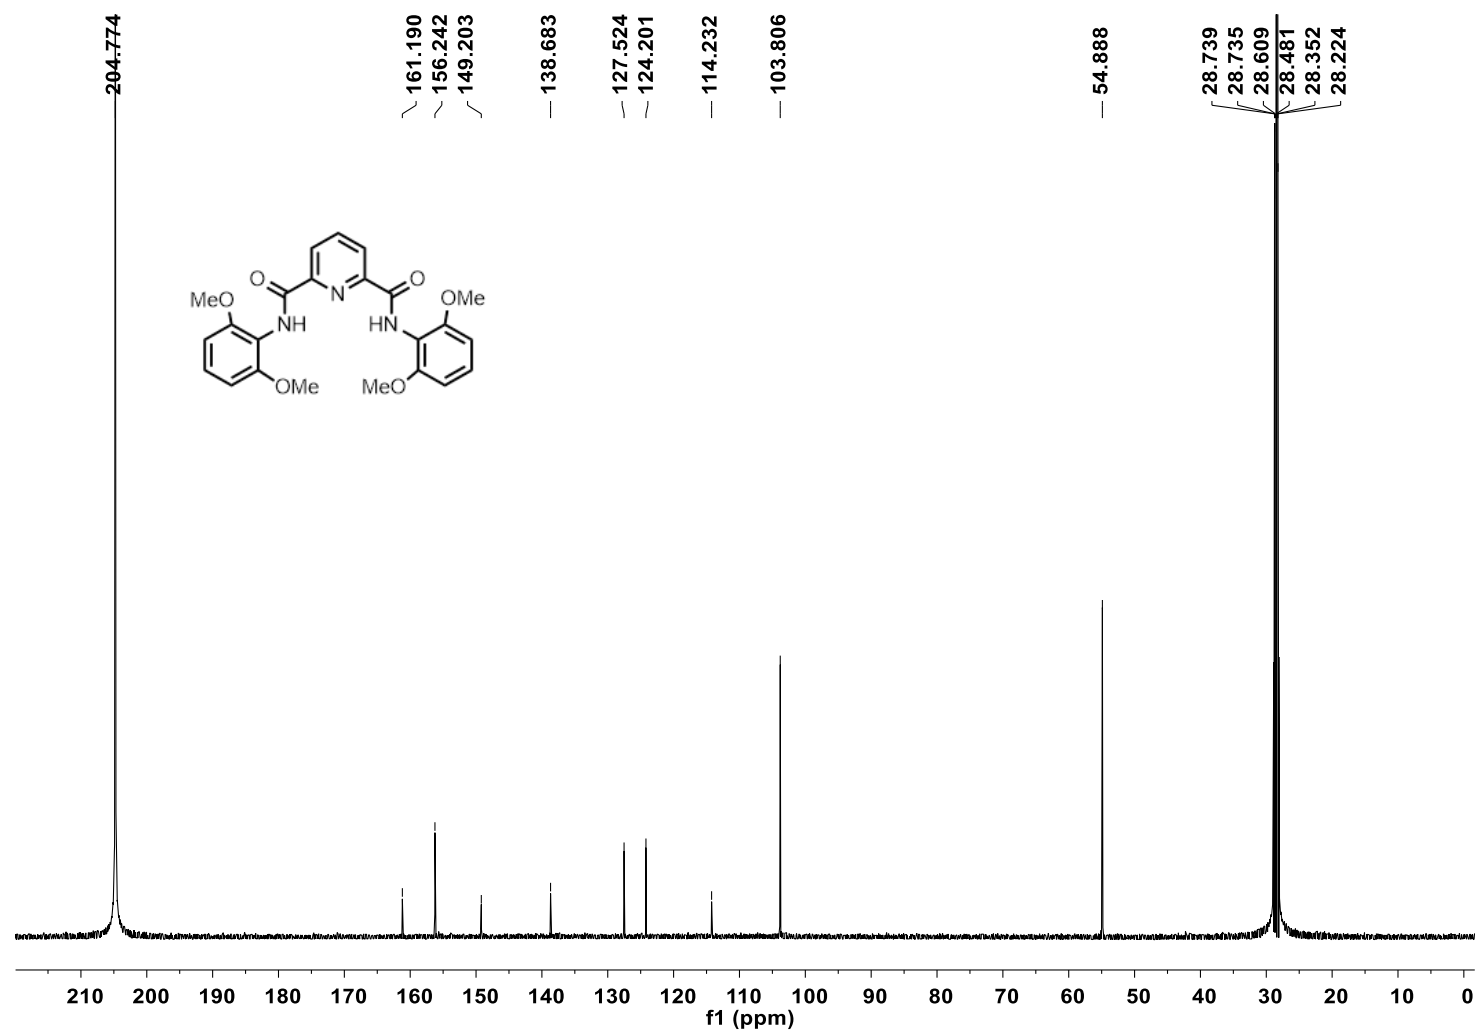



<sup>13</sup>C NMR (151 MHz, Acetone-*d*<sub>6</sub>) spectrum of TC11

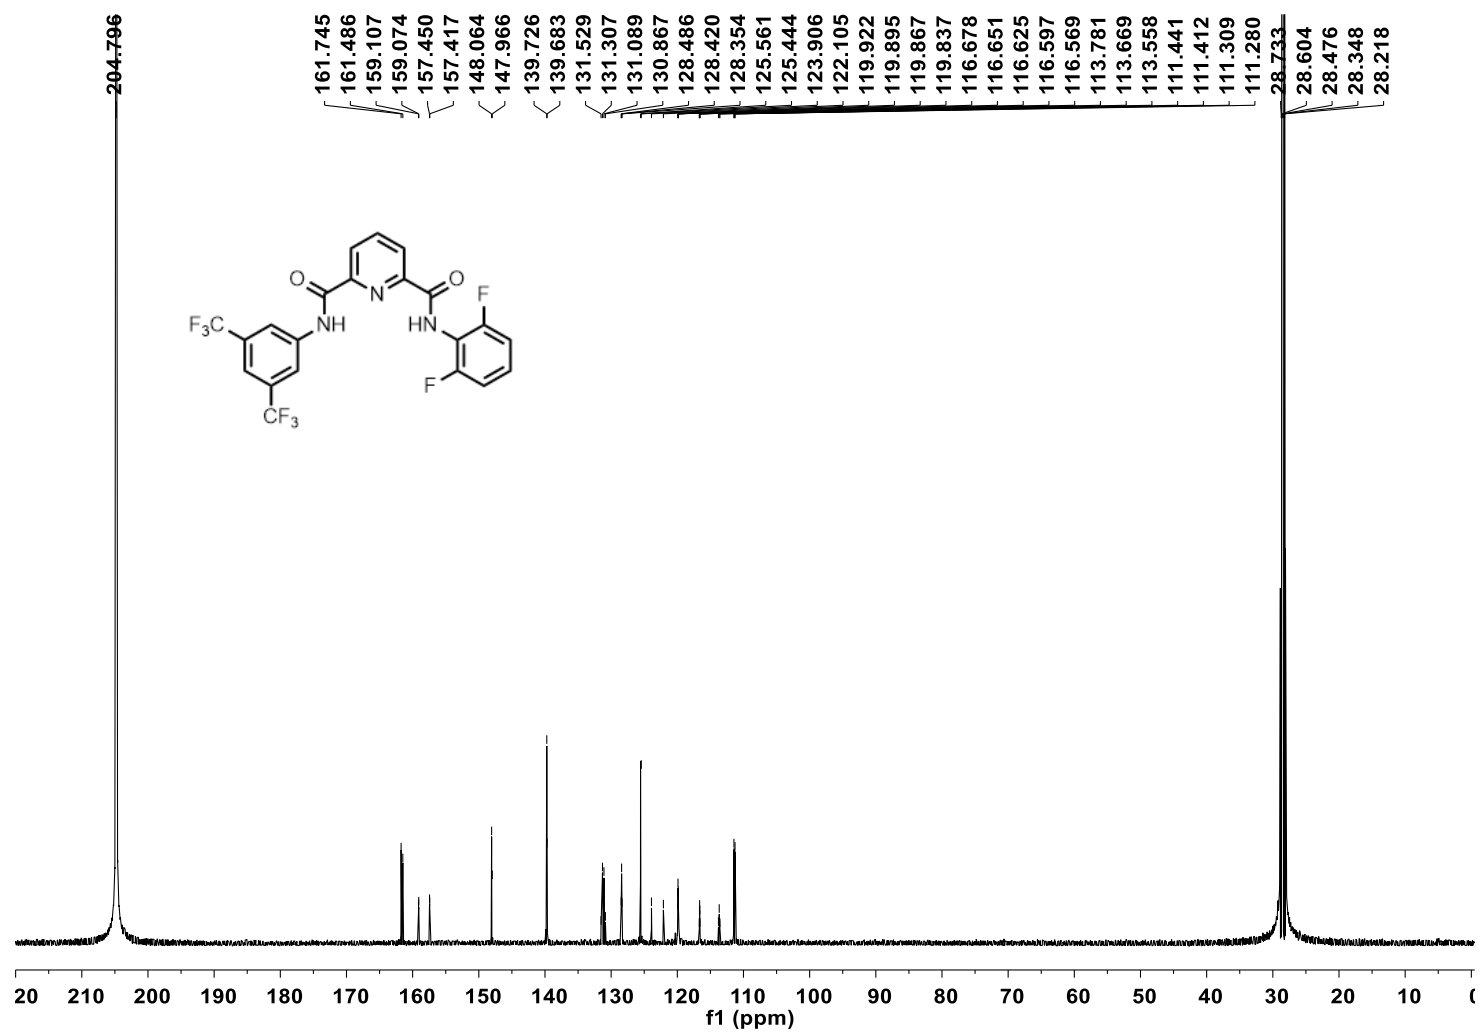

<sup>19</sup>F NMR (376 MHz, Acetone-*d*<sub>6</sub>) spectrum of TC11

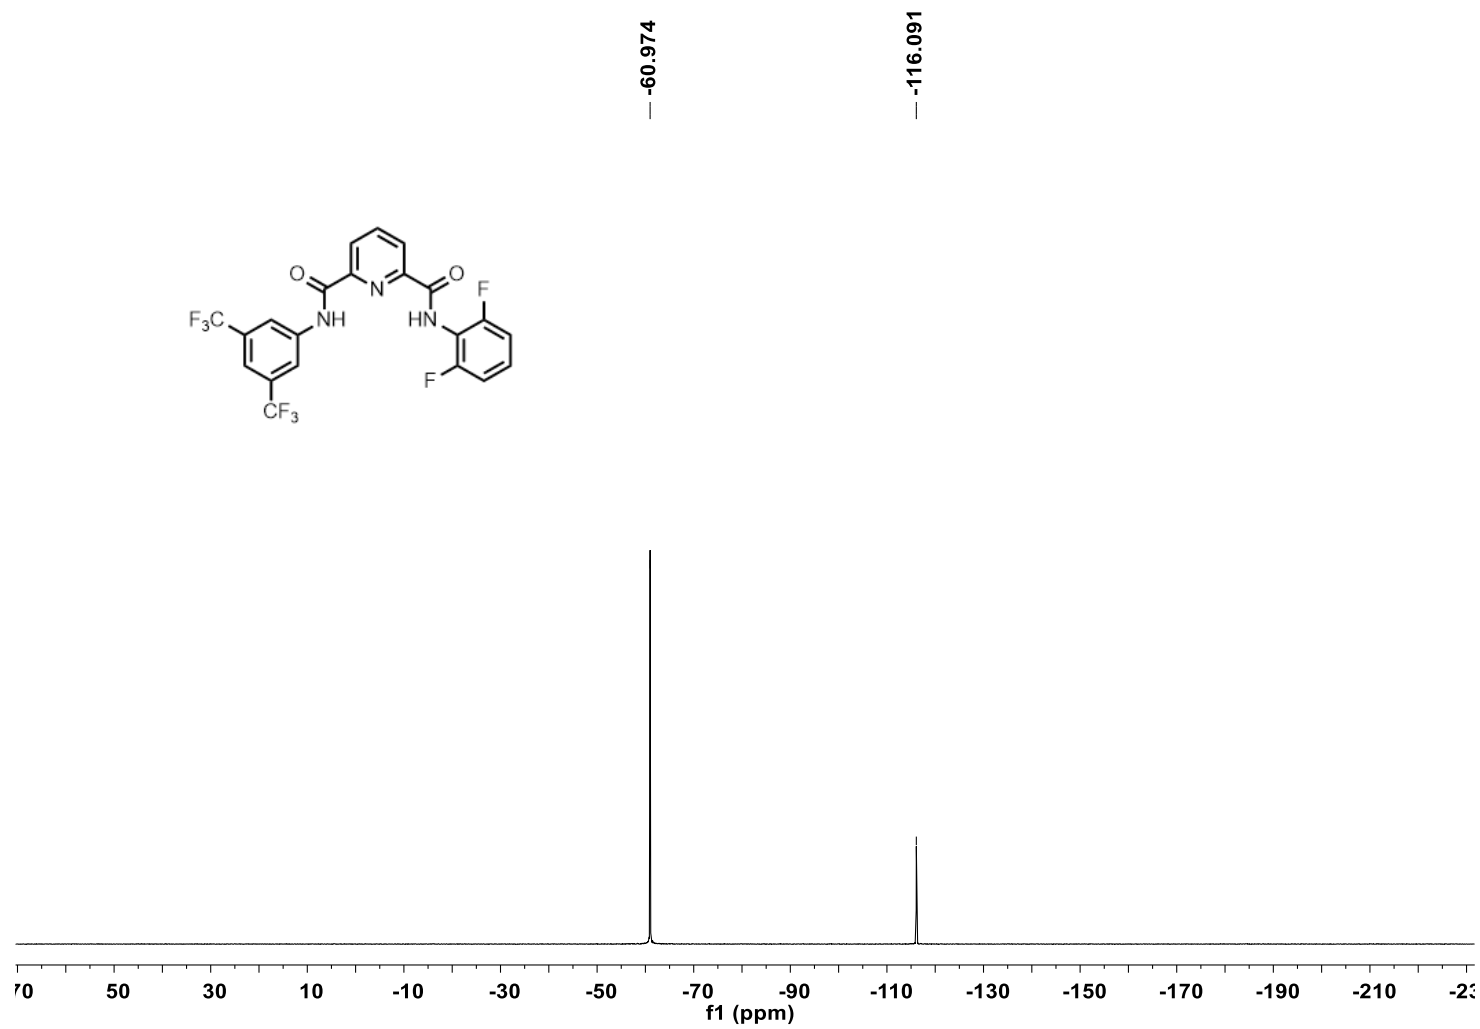



<sup>1</sup>H NMR (600 MHz, CDCl<sub>3</sub>) spectrum of TC12

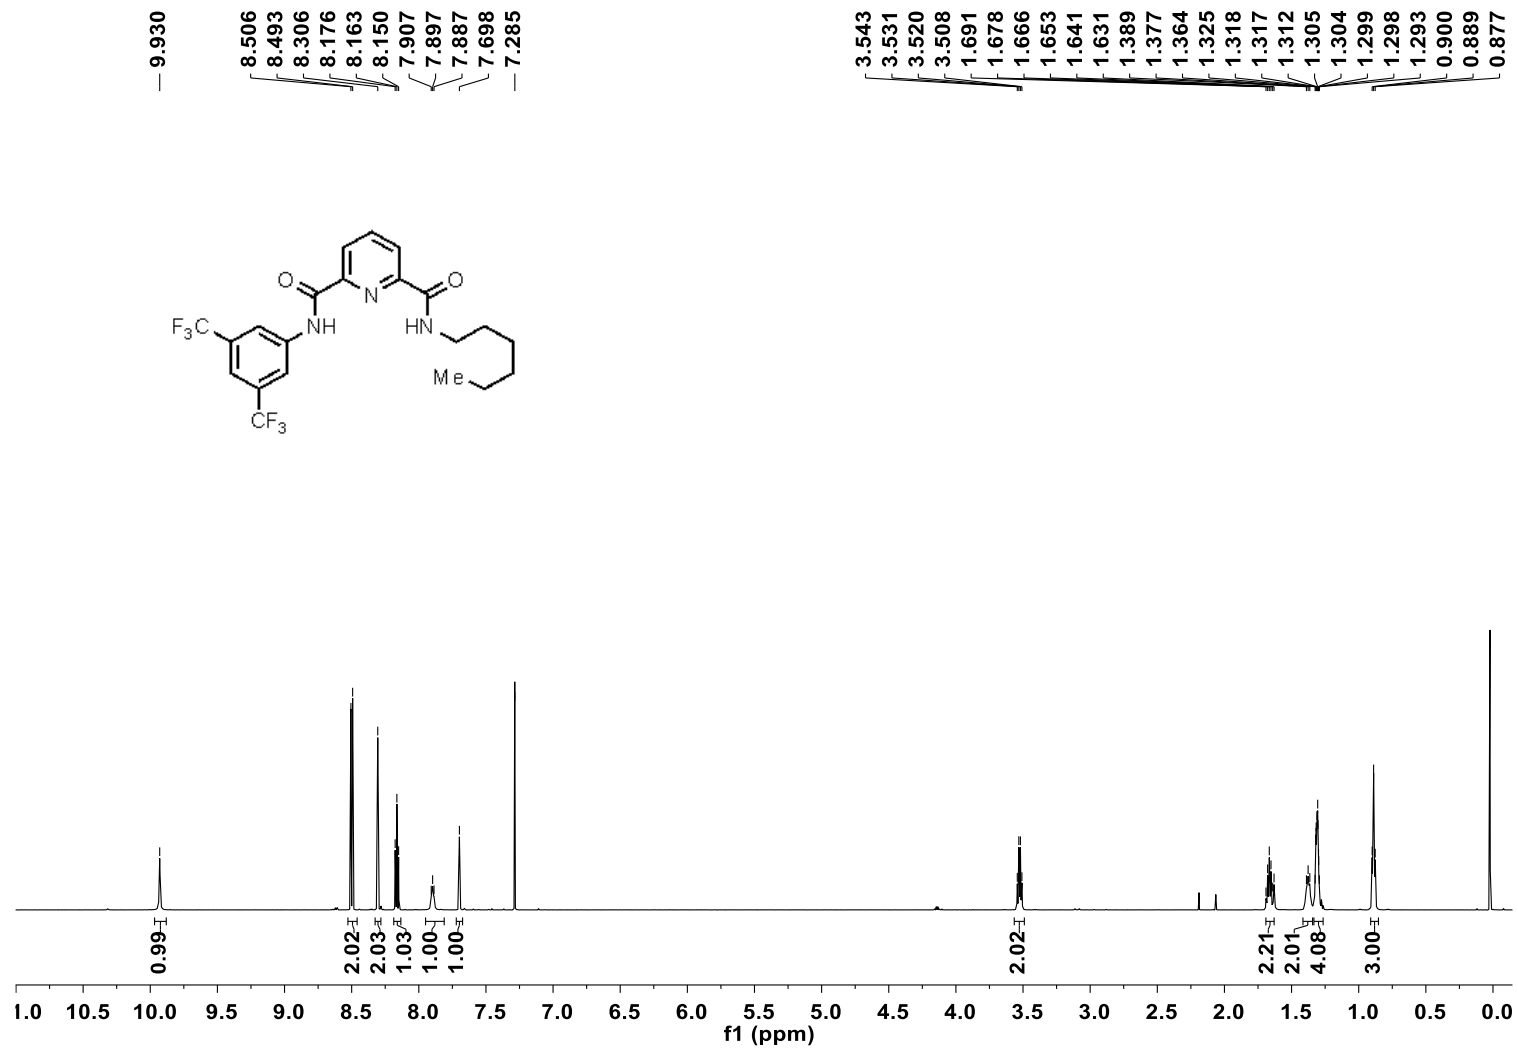

$^{13}\text{C}$  NMR (151 MHz,  $\text{CDCl}_3$ ) spectrum of TC12

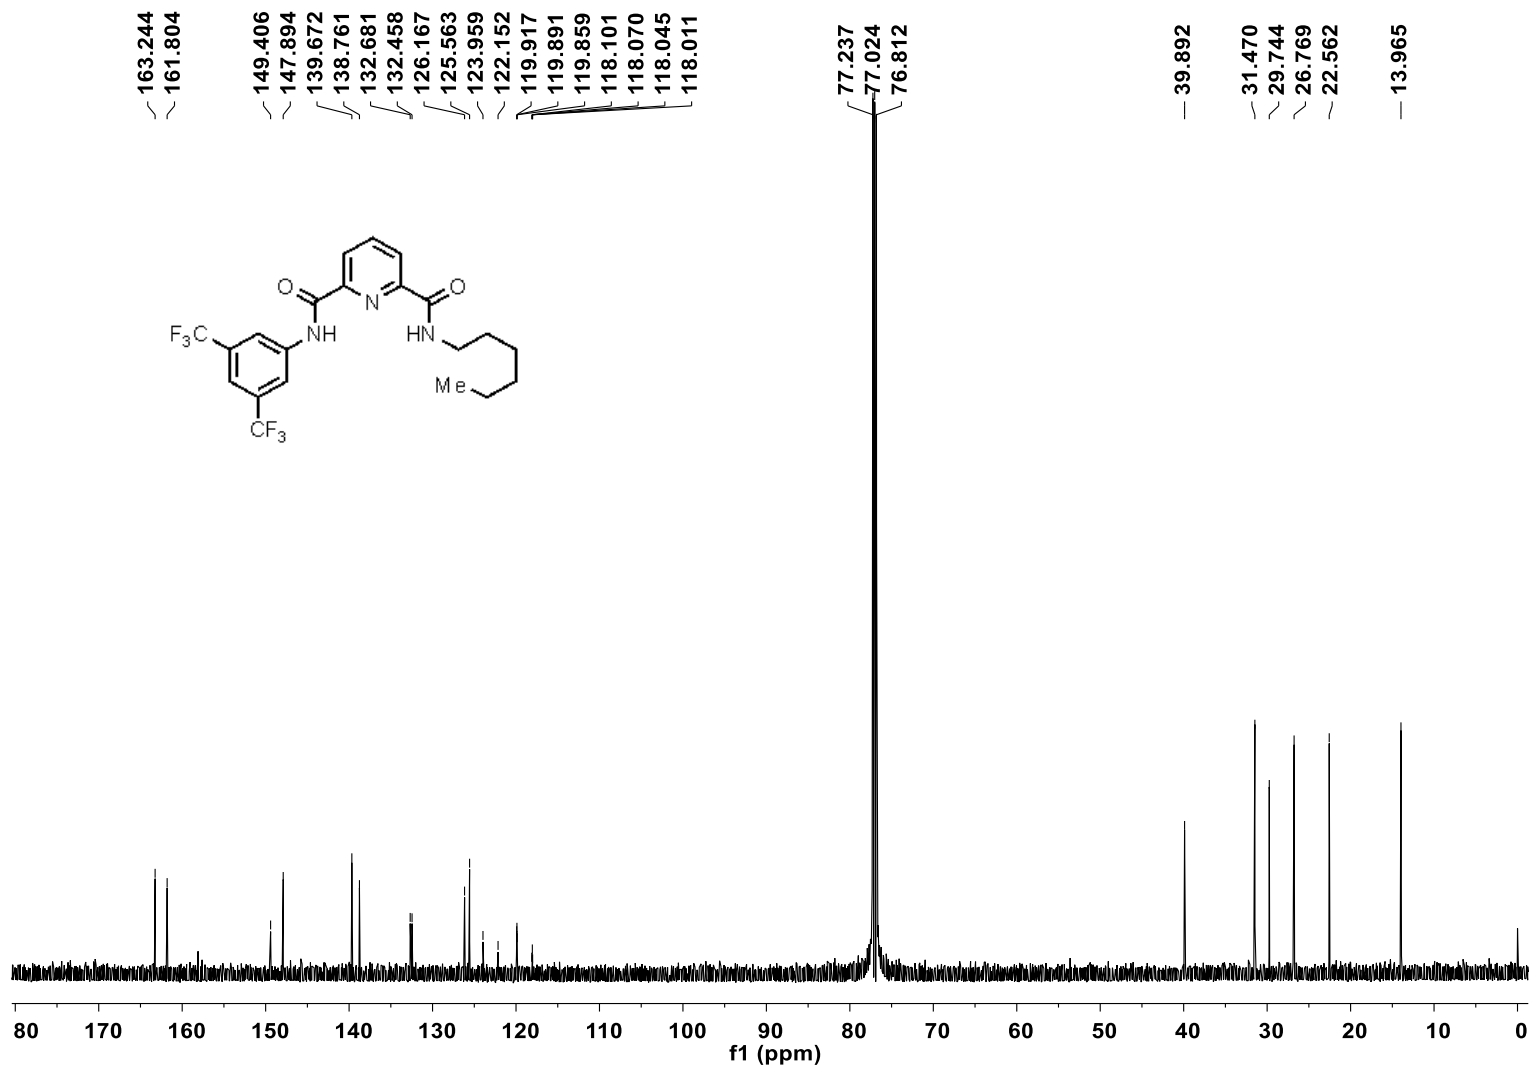

$^{19}\text{F}$  NMR (376 MHz,  $\text{CDCl}_3$ ) spectrum of TC12

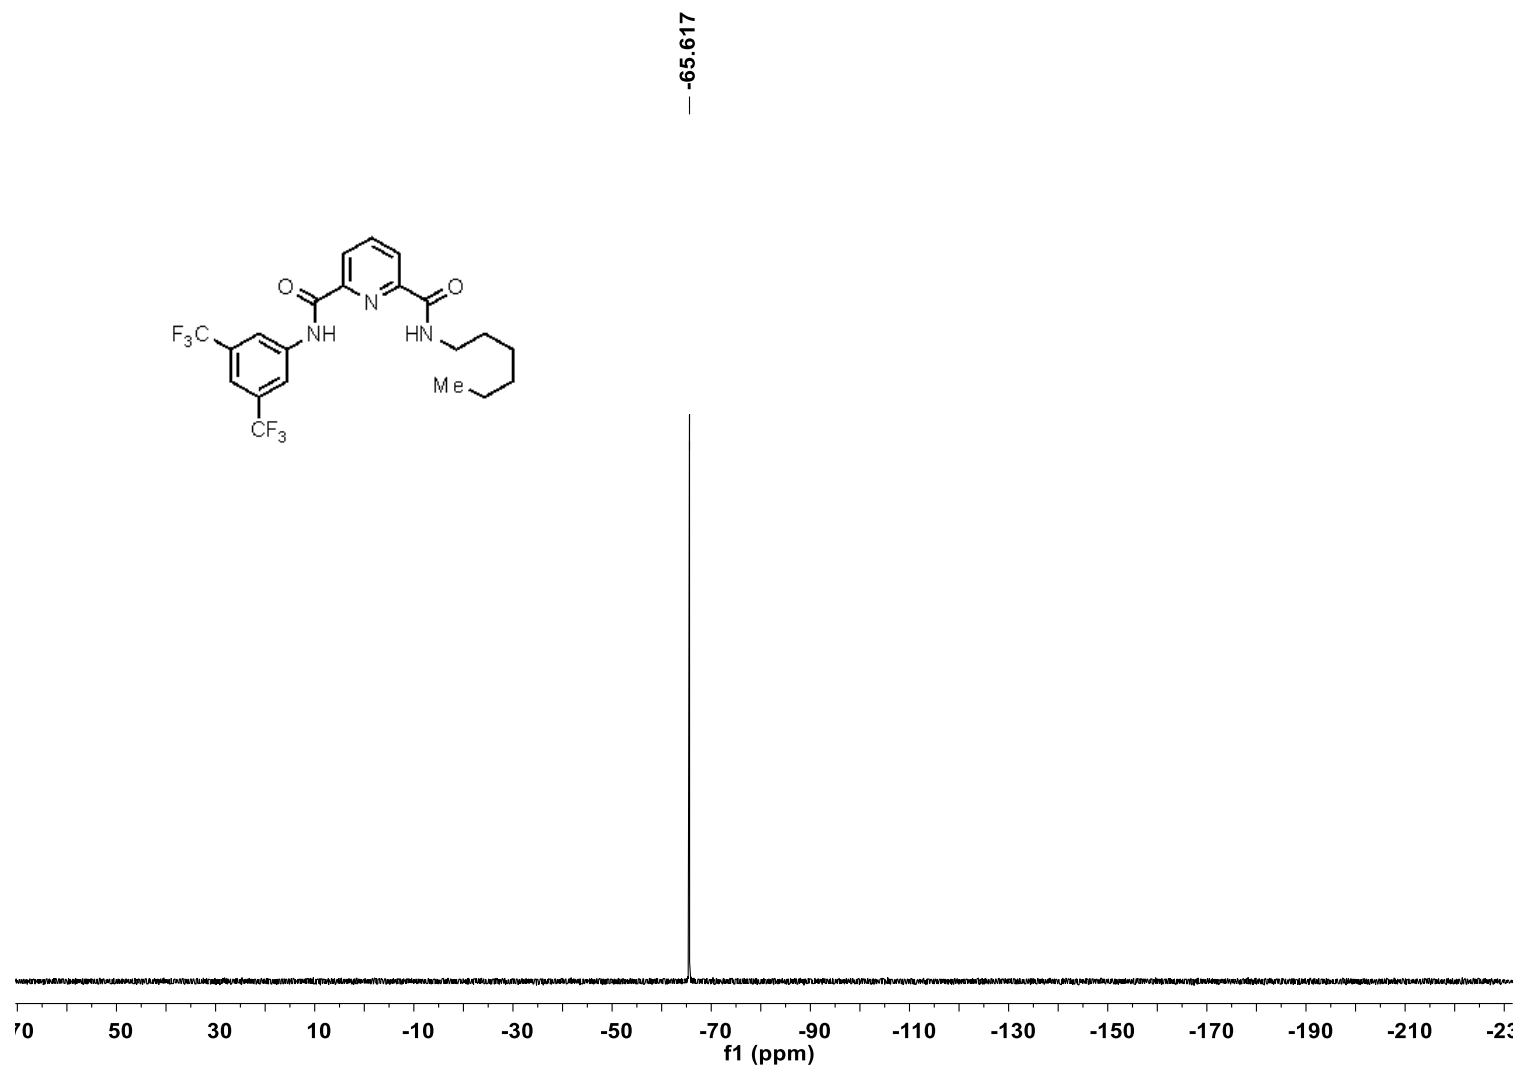

<sup>1</sup>H NMR (600 MHz, CDCl<sub>3</sub>) spectrum of *cis*-S51

8.413  
8.410  
8.405  
8.402  
8.258  
8.254  
7.750  
7.747  
7.479  
7.466  
7.429  
7.425  
7.415  
7.411  
7.260  
7.237  
7.234  
7.231  
7.227  
7.225  
7.222  
7.217  
7.214  
7.180  
7.179  
7.172  
7.171  
7.167  
7.166  
7.159  
7.158  
7.132  
7.122  
7.119  
7.117  
7.108  
6.925  
6.911  
5.731  
5.718  
4.696  
4.663  
4.654  
3.150  
3.132  
3.120  
3.115  
3.110  
3.105  
1.903  
1.898  
1.896  
1.894  
1.891  
1.886  
1.874

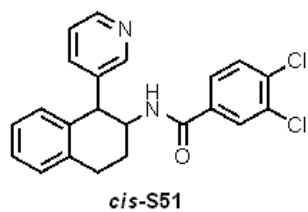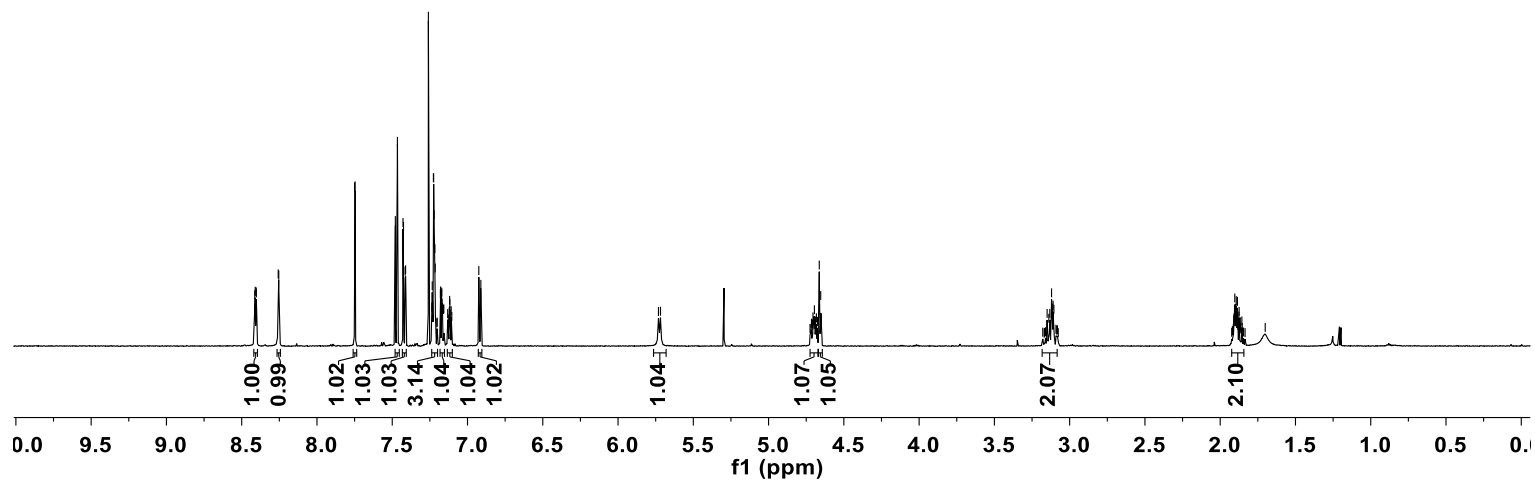

<sup>13</sup>C NMR (151 MHz, CDCl<sub>3</sub>) spectrum of *cis*-S51

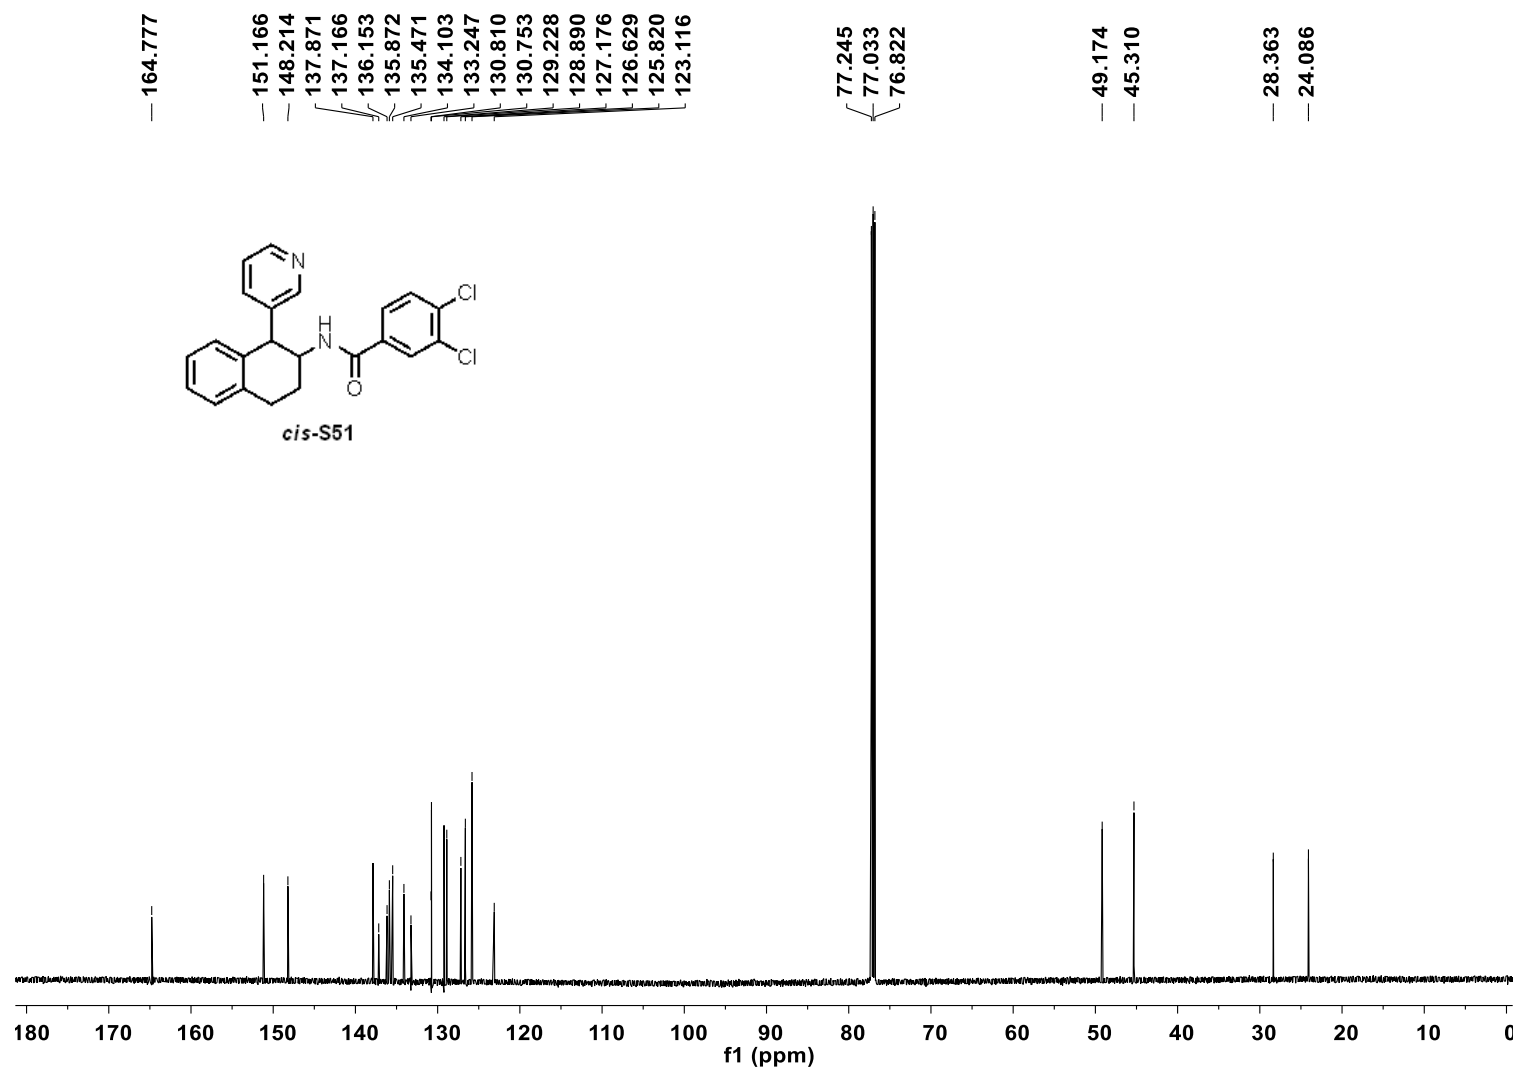

<sup>1</sup>H NMR (600 MHz, CDCl<sub>3</sub>) spectrum of (*R,R*)-S39-(*R*)-MTPA

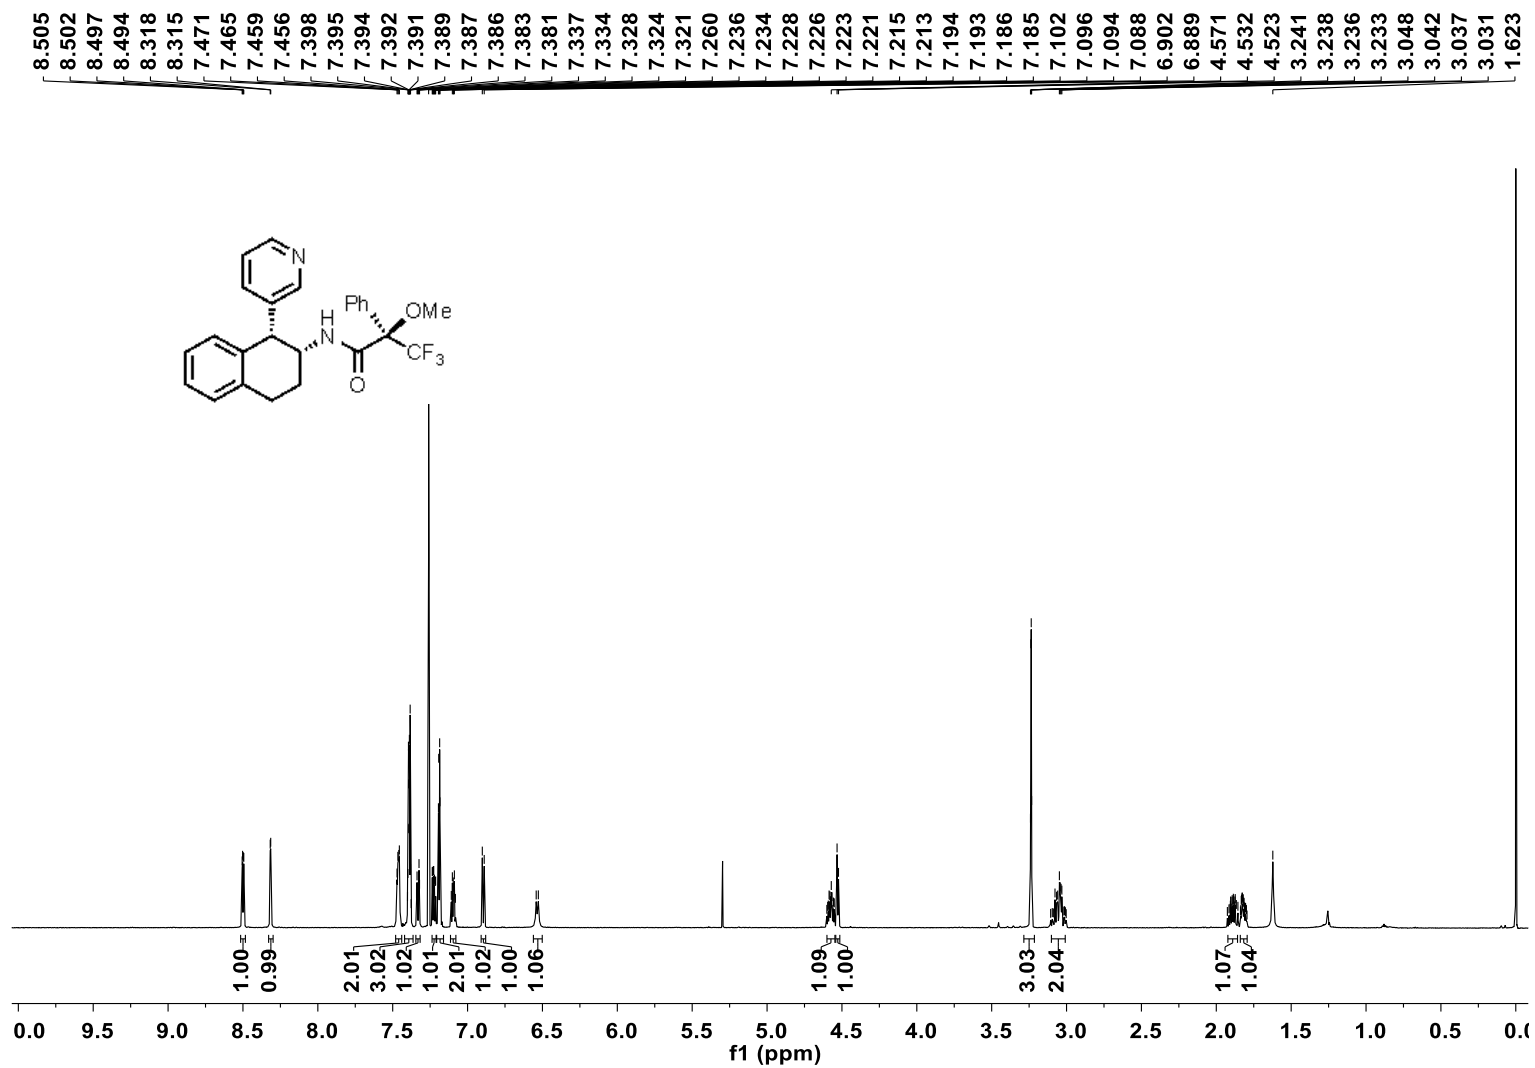

<sup>13</sup>C NMR (151 MHz, CDCl<sub>3</sub>) spectrum of (*R,R*)-S39-(*R*)-MTPA

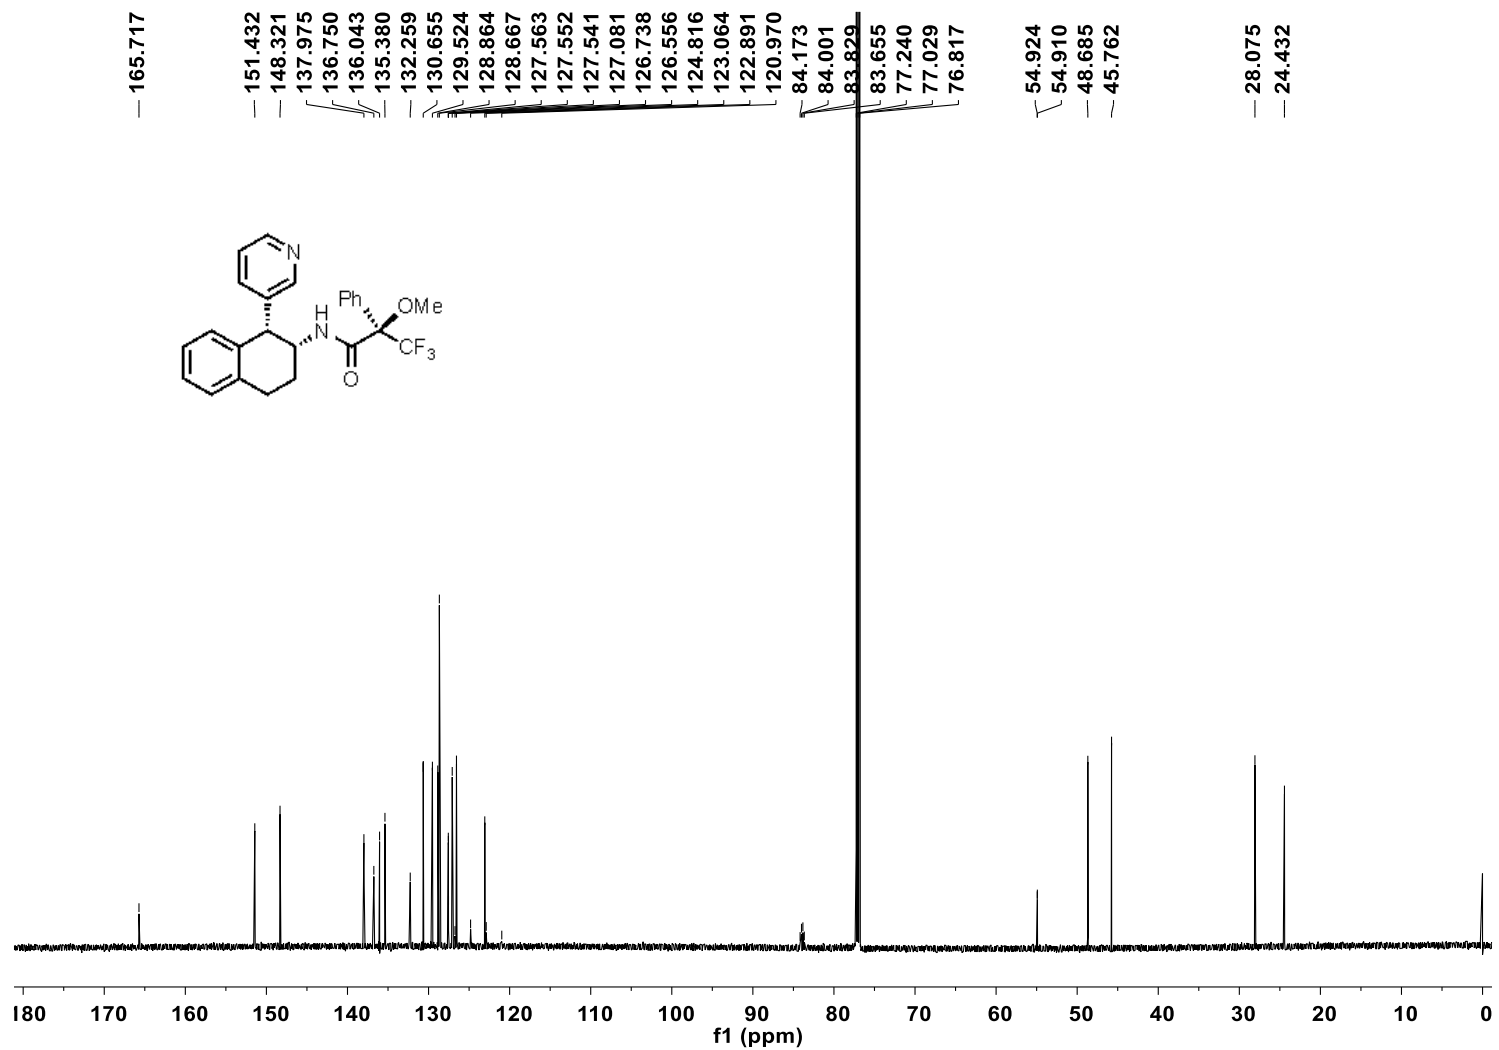

$^{19}\text{F}$  NMR (376 MHz,  $\text{CDCl}_3$ ) spectrum of (*R,R*)-S39-(*R*)-MTPA

-70.727

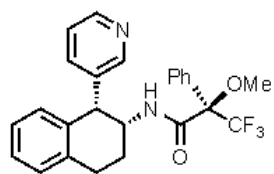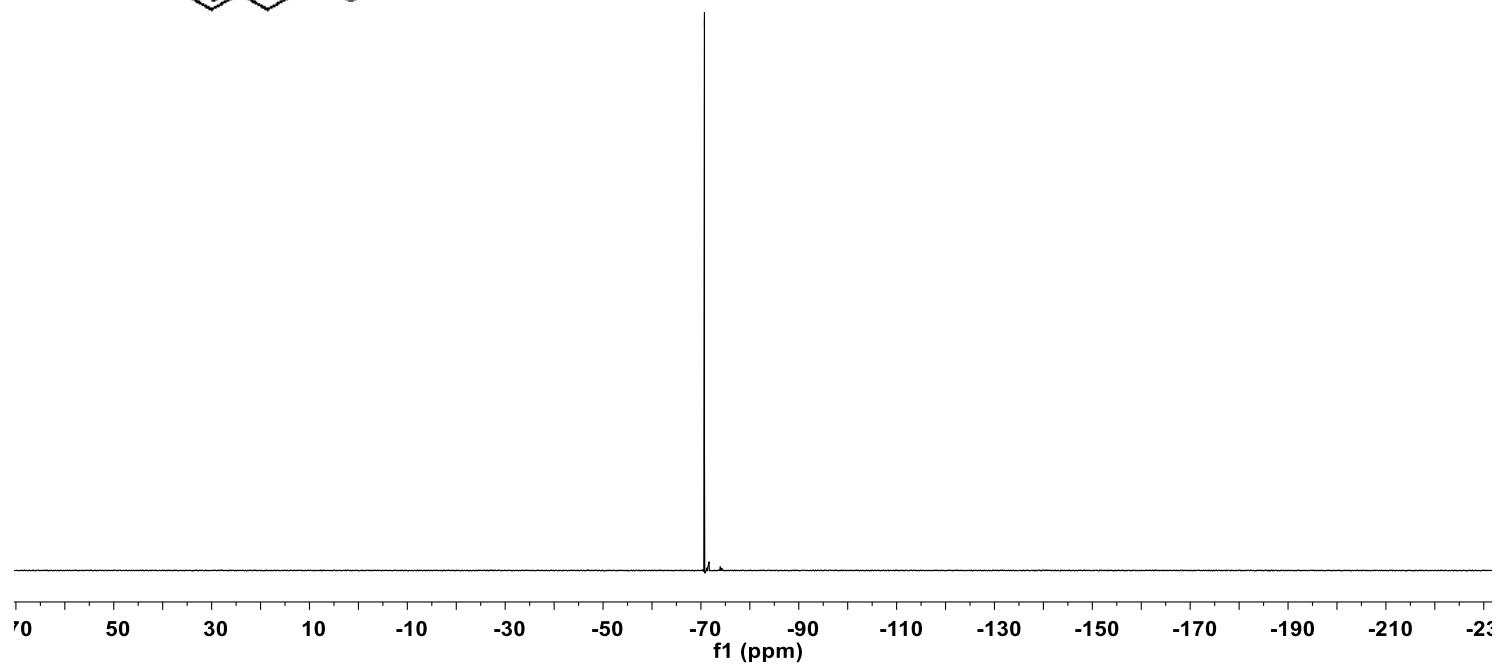



<sup>1</sup>H NMR (600 MHz, CDCl<sub>3</sub>) spectrum of (*S,S*)-**S39**-(*R*)-MTPA

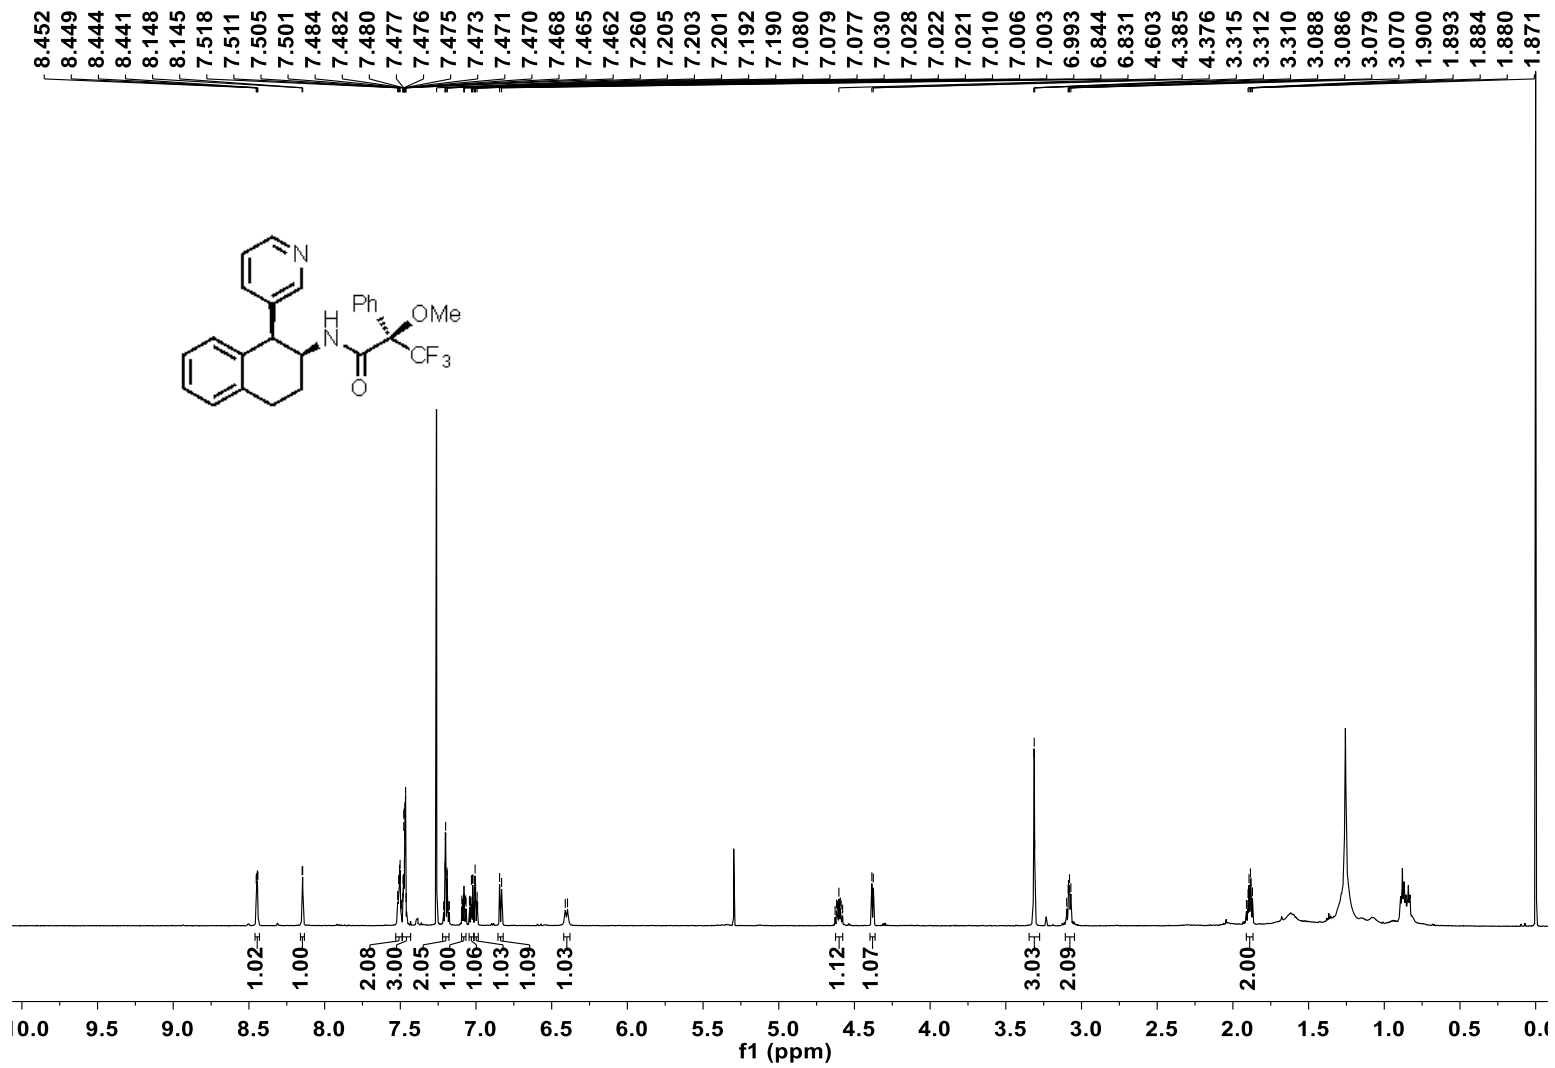

$^{13}\text{C}$  NMR (151 MHz,  $\text{CDCl}_3$ ) spectrum of (*S,S*)-**S39-(R)**-MTPA

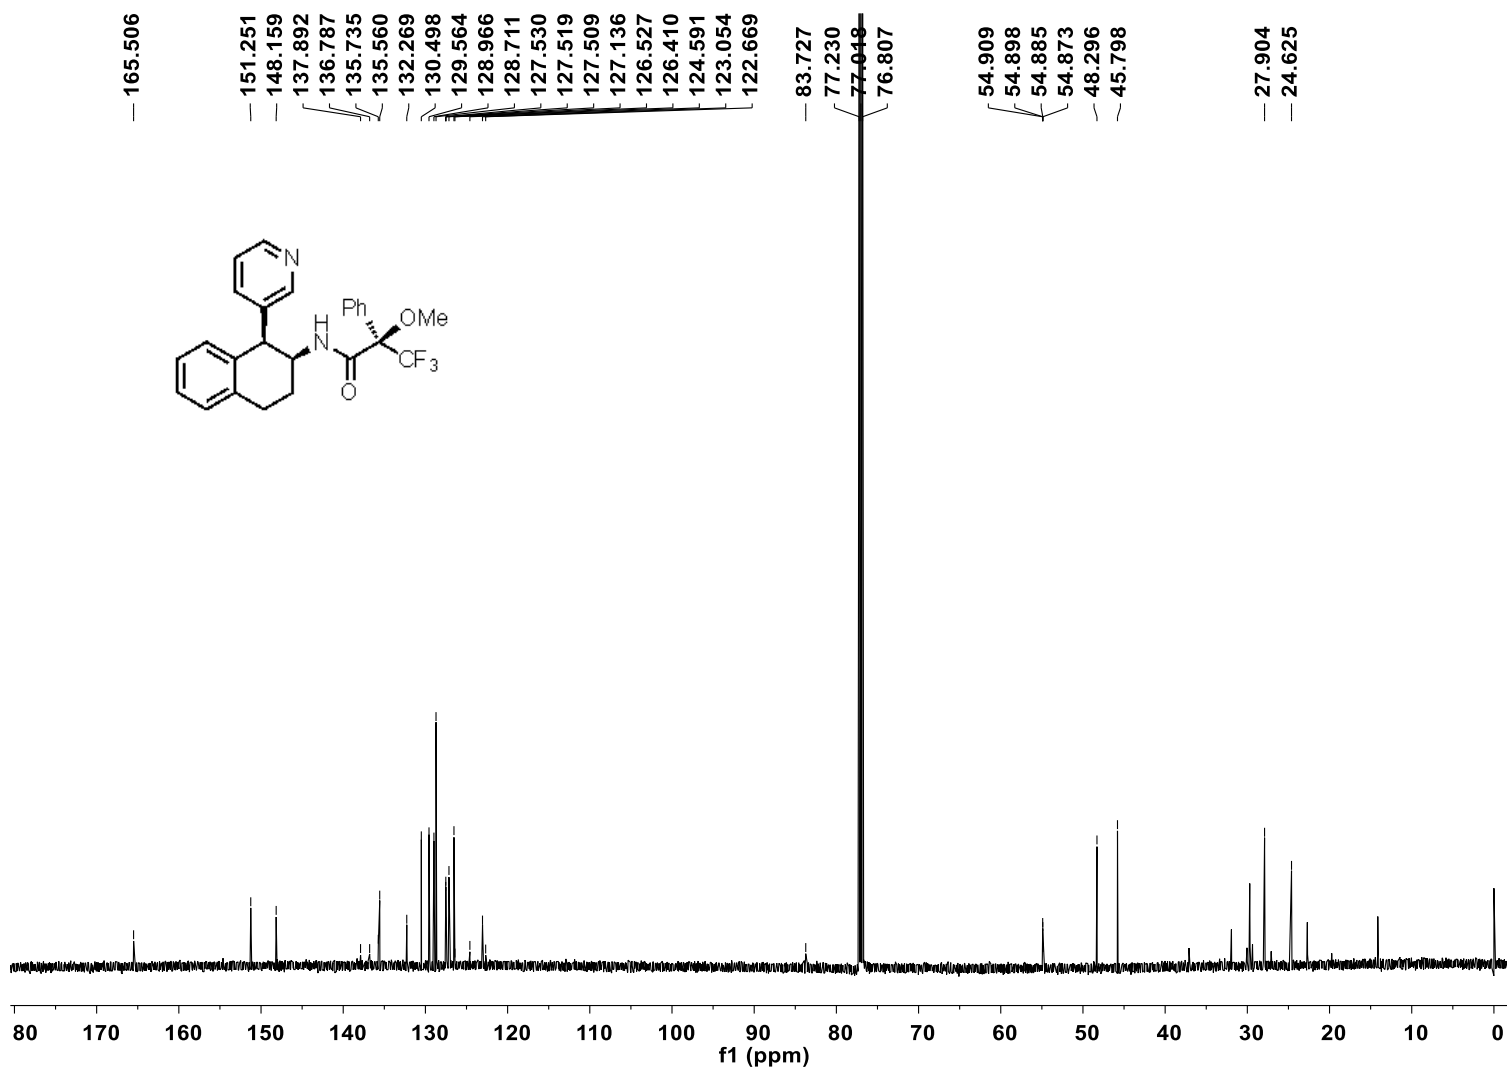

$^{19}\text{F}$  NMR (376 MHz,  $\text{CDCl}_3$ ) spectrum of (*S,S*)-**S39**-(*R*)-MTPA

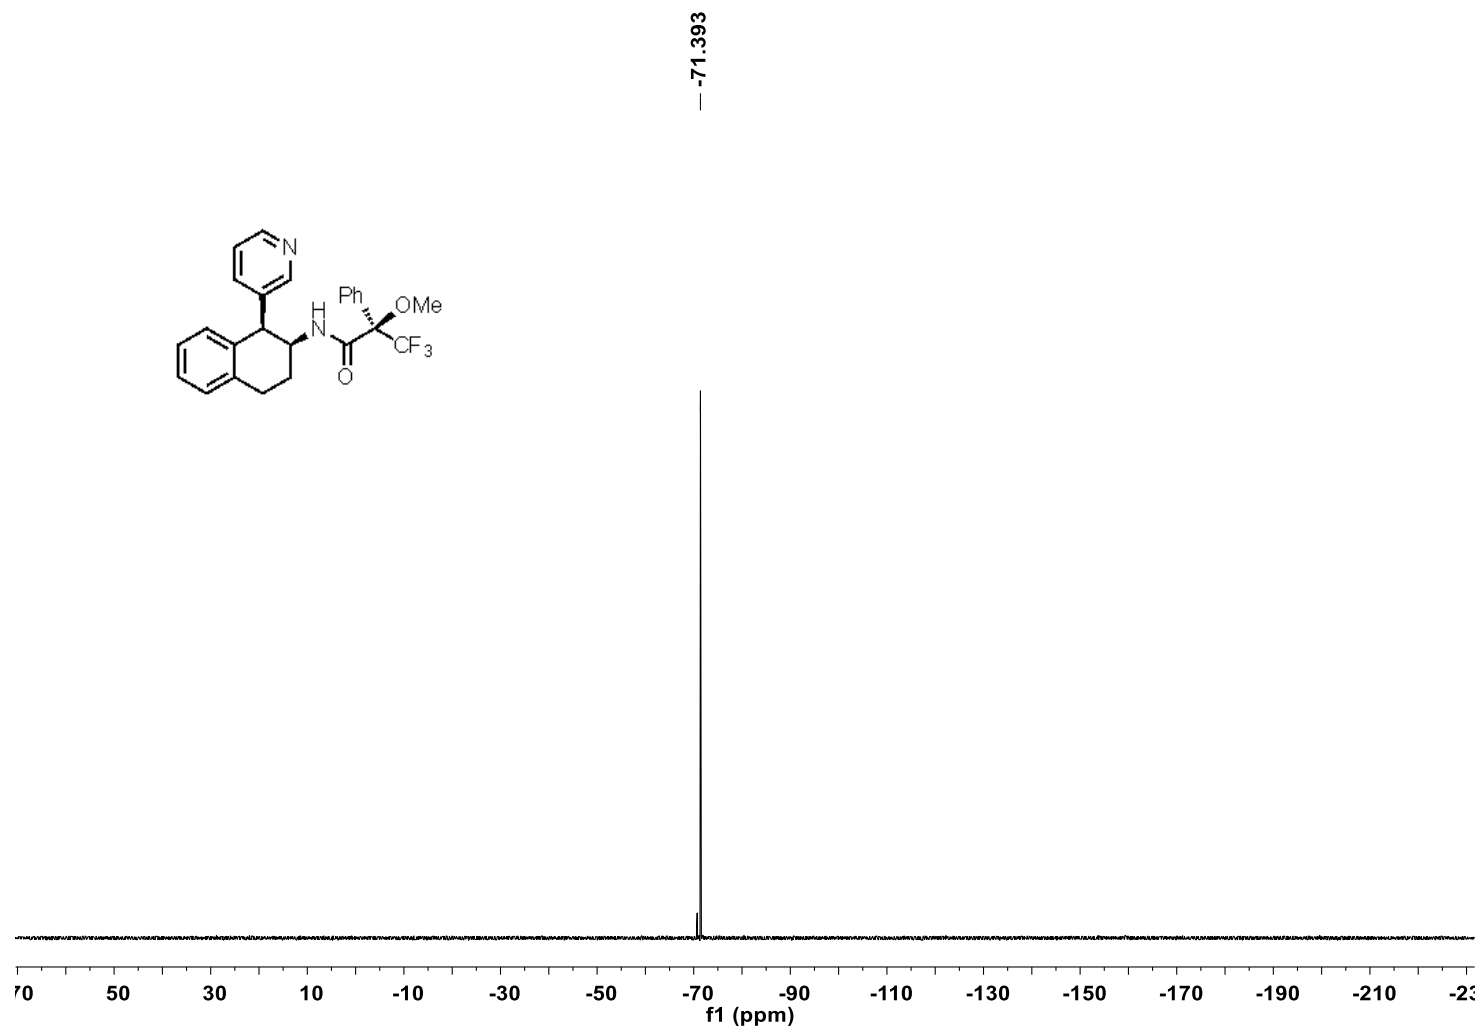

<sup>1</sup>H NMR (600 MHz, CDCl<sub>3</sub>) spectrum of **2a**

8.939  
8.936  
8.932  
8.929  
8.186  
8.172  
8.114  
8.098  
7.918  
7.915  
7.912  
7.906  
7.867  
7.840  
7.451  
7.444  
7.437  
7.430  
7.264  
6.594  
6.568

4.321  
4.310  
4.298  
4.286

1.379  
1.367  
1.355

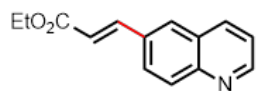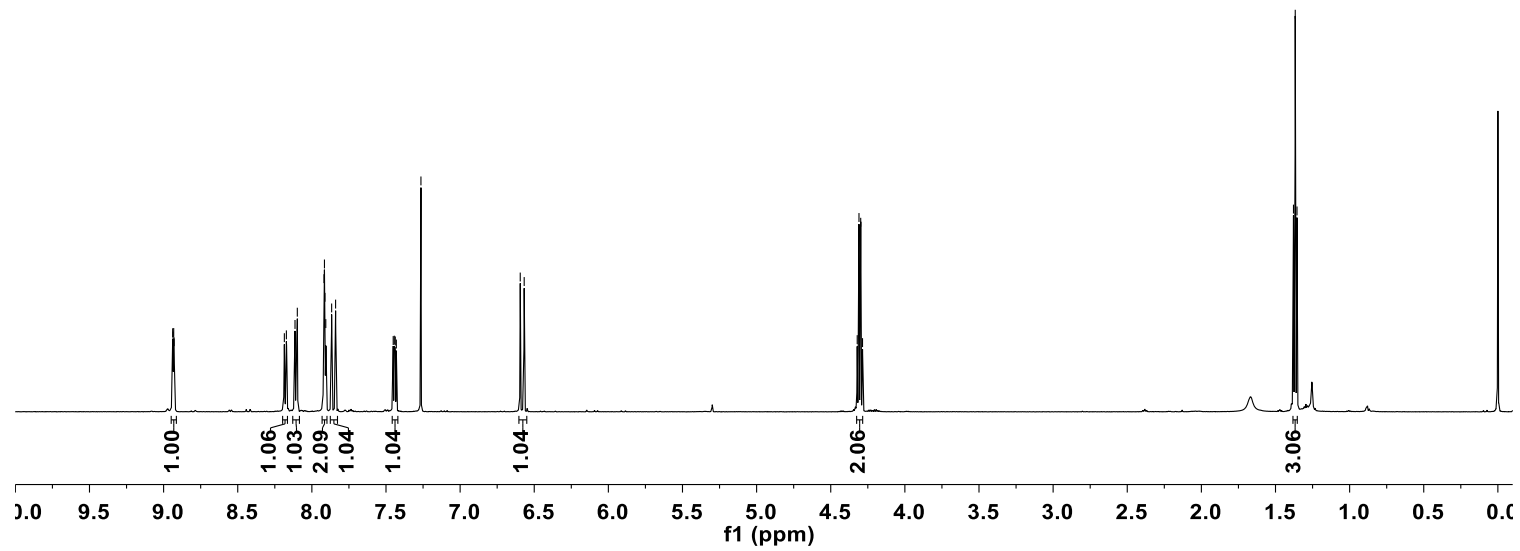

$^{13}\text{C}$  NMR (151 MHz,  $\text{CDCl}_3$ ) spectrum of **2a**

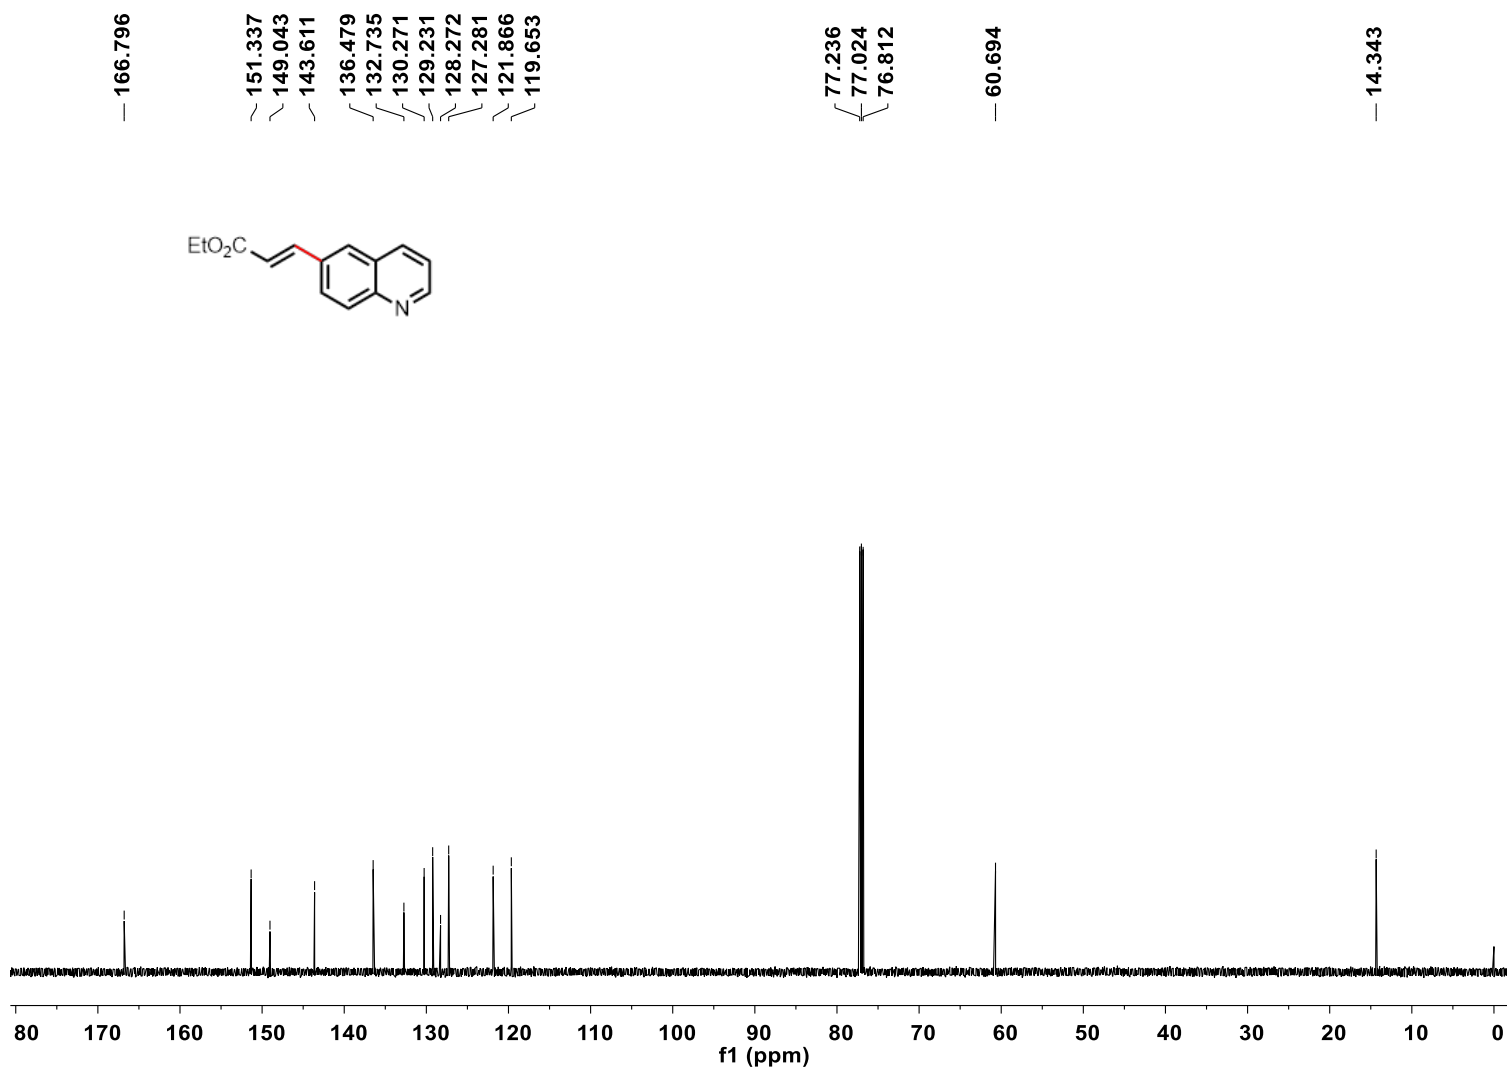

<sup>1</sup>H NMR (600 MHz, CDCl<sub>3</sub>) spectrum of **2b**

7.977  
7.963  
7.839  
7.823  
7.817  
7.814  
7.810  
7.807  
7.802  
7.796  
7.262  
6.929  
6.914  
6.519  
6.493

4.305  
4.293  
4.281  
4.269  
4.080

1.367  
1.355  
1.343

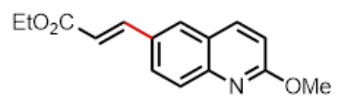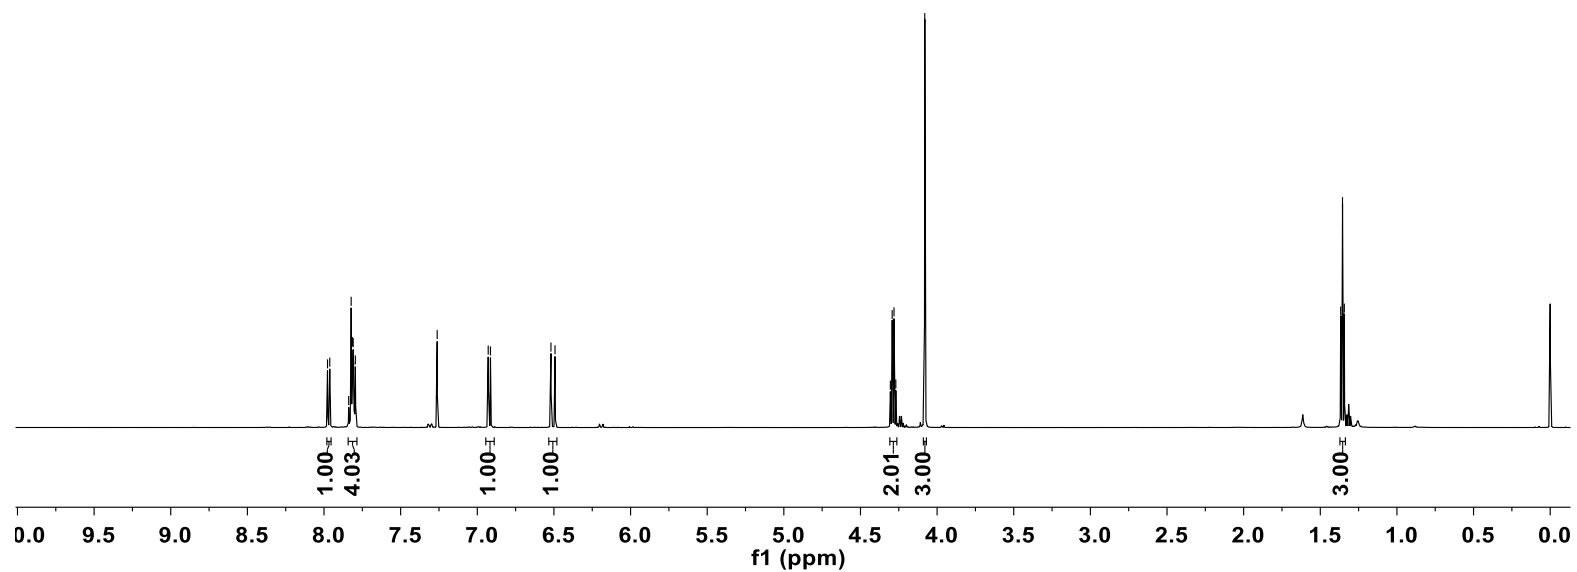

$^{13}\text{C}$  NMR (151 MHz,  $\text{CDCl}_3$ ) spectrum of **2b**

— 167.055  
— 163.259  
— 147.816  
— 144.105  
— 138.904  
— 130.246  
— 128.791  
— 127.978  
— 127.607  
— 124.970  
— 118.035  
— 113.897  
— 77.237  
— 77.025  
— 76.812  
— 60.527  
— 53.596  
— 14.359

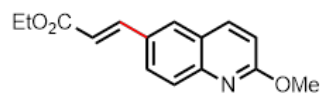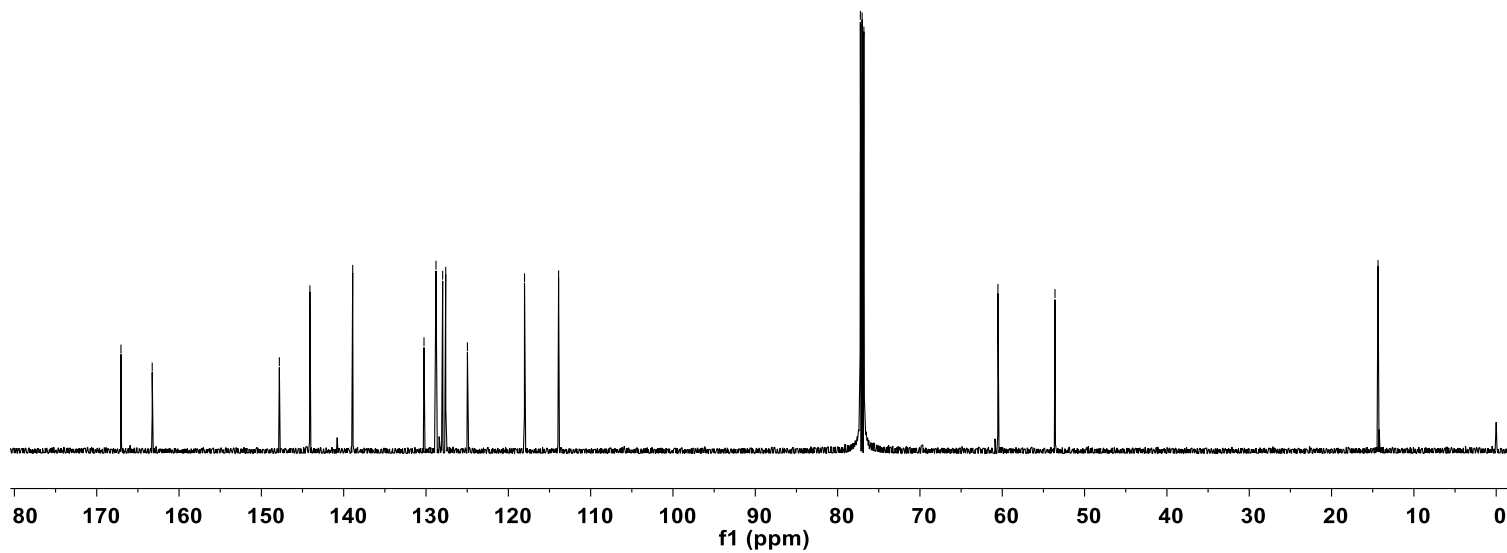

<sup>1</sup>H NMR (600 MHz, CDCl<sub>3</sub>) spectrum of 2c

8.126  
8.111  
8.026  
8.011  
7.933  
7.930  
7.919  
7.915  
7.904  
7.837  
7.810  
7.433  
7.419  
7.264

6.586  
6.559

4.320  
4.308  
4.296  
4.283

1.376  
1.364  
1.352

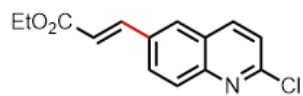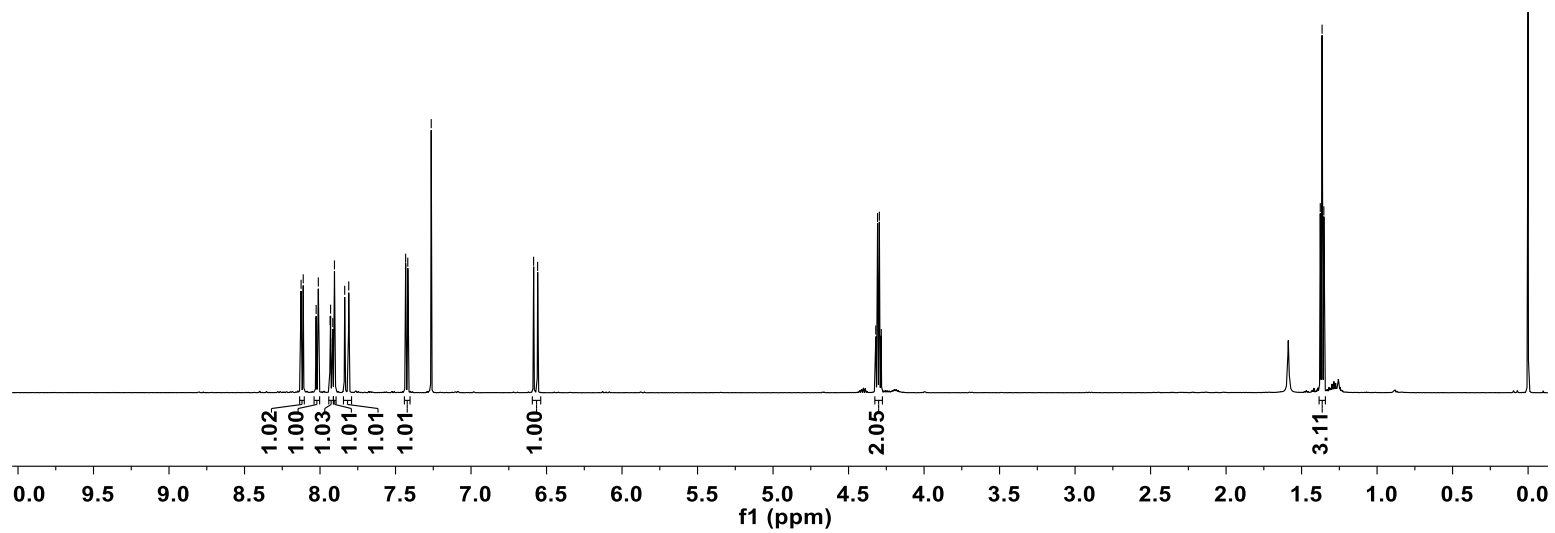



<sup>13</sup>C NMR (151 MHz, CDCl<sub>3</sub>) spectrum of **2c**

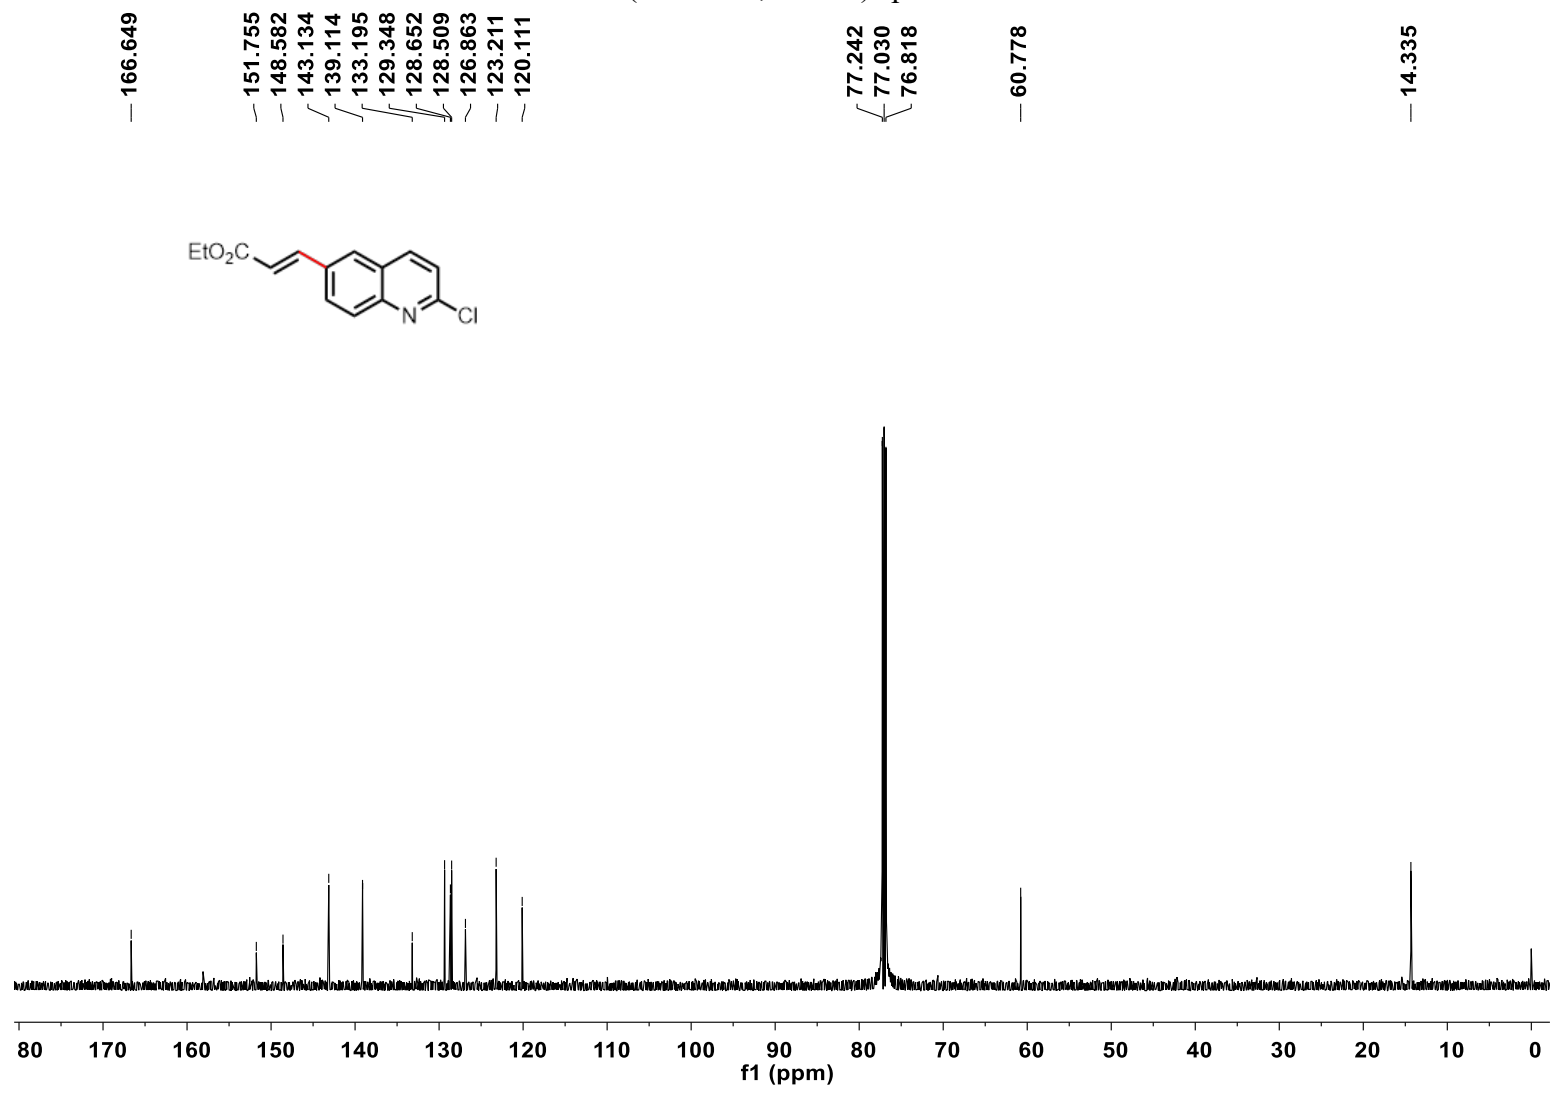

$^1\text{H}$  NMR (600 MHz,  $\text{CDCl}_3$ ) spectrum of **2d**

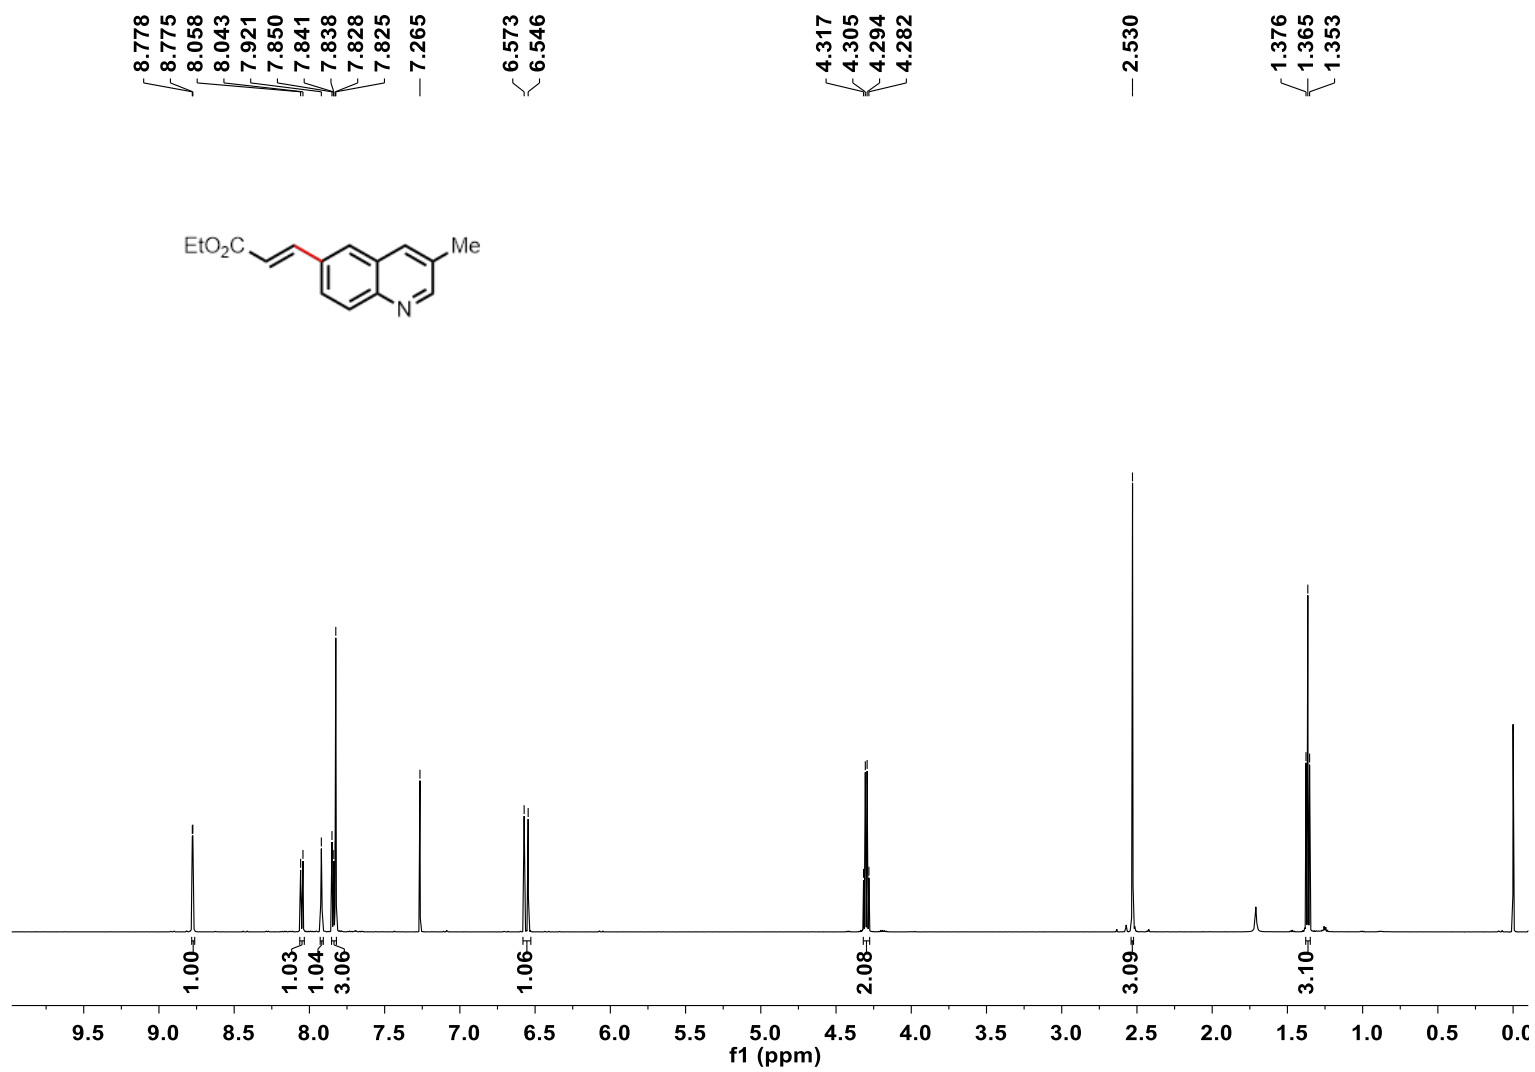

$^{13}\text{C}$  NMR (151 MHz,  $\text{CDCl}_3$ ) spectrum of **2d**

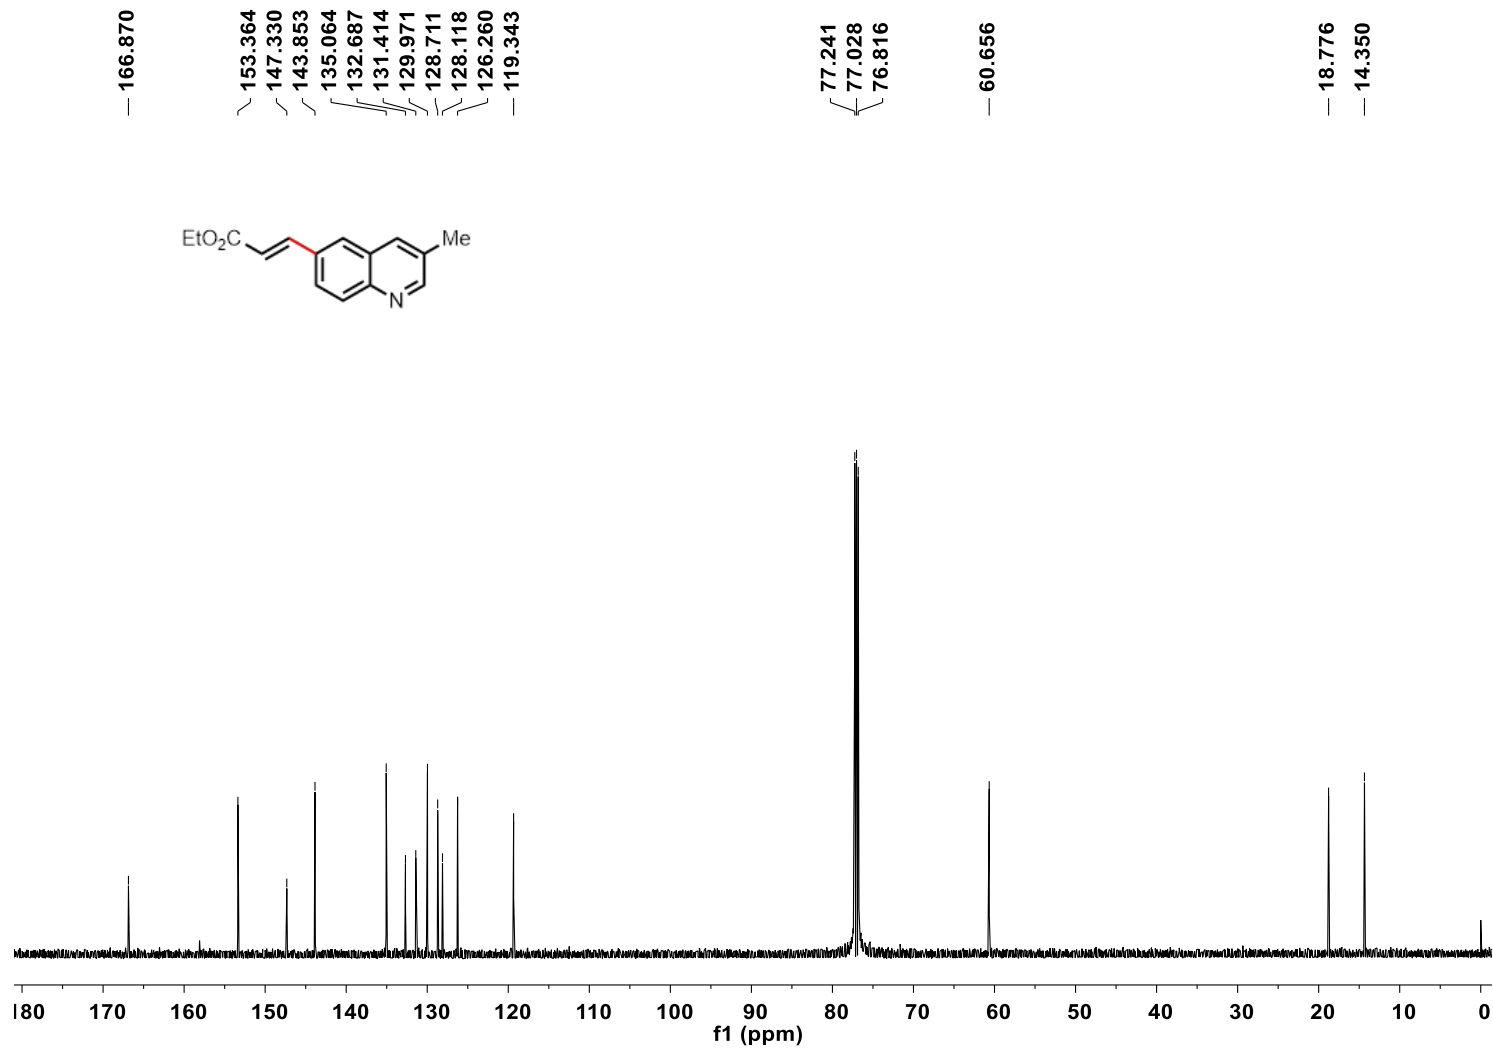

<sup>1</sup>H NMR (600 MHz, CDCl<sub>3</sub>) spectrum of 2e

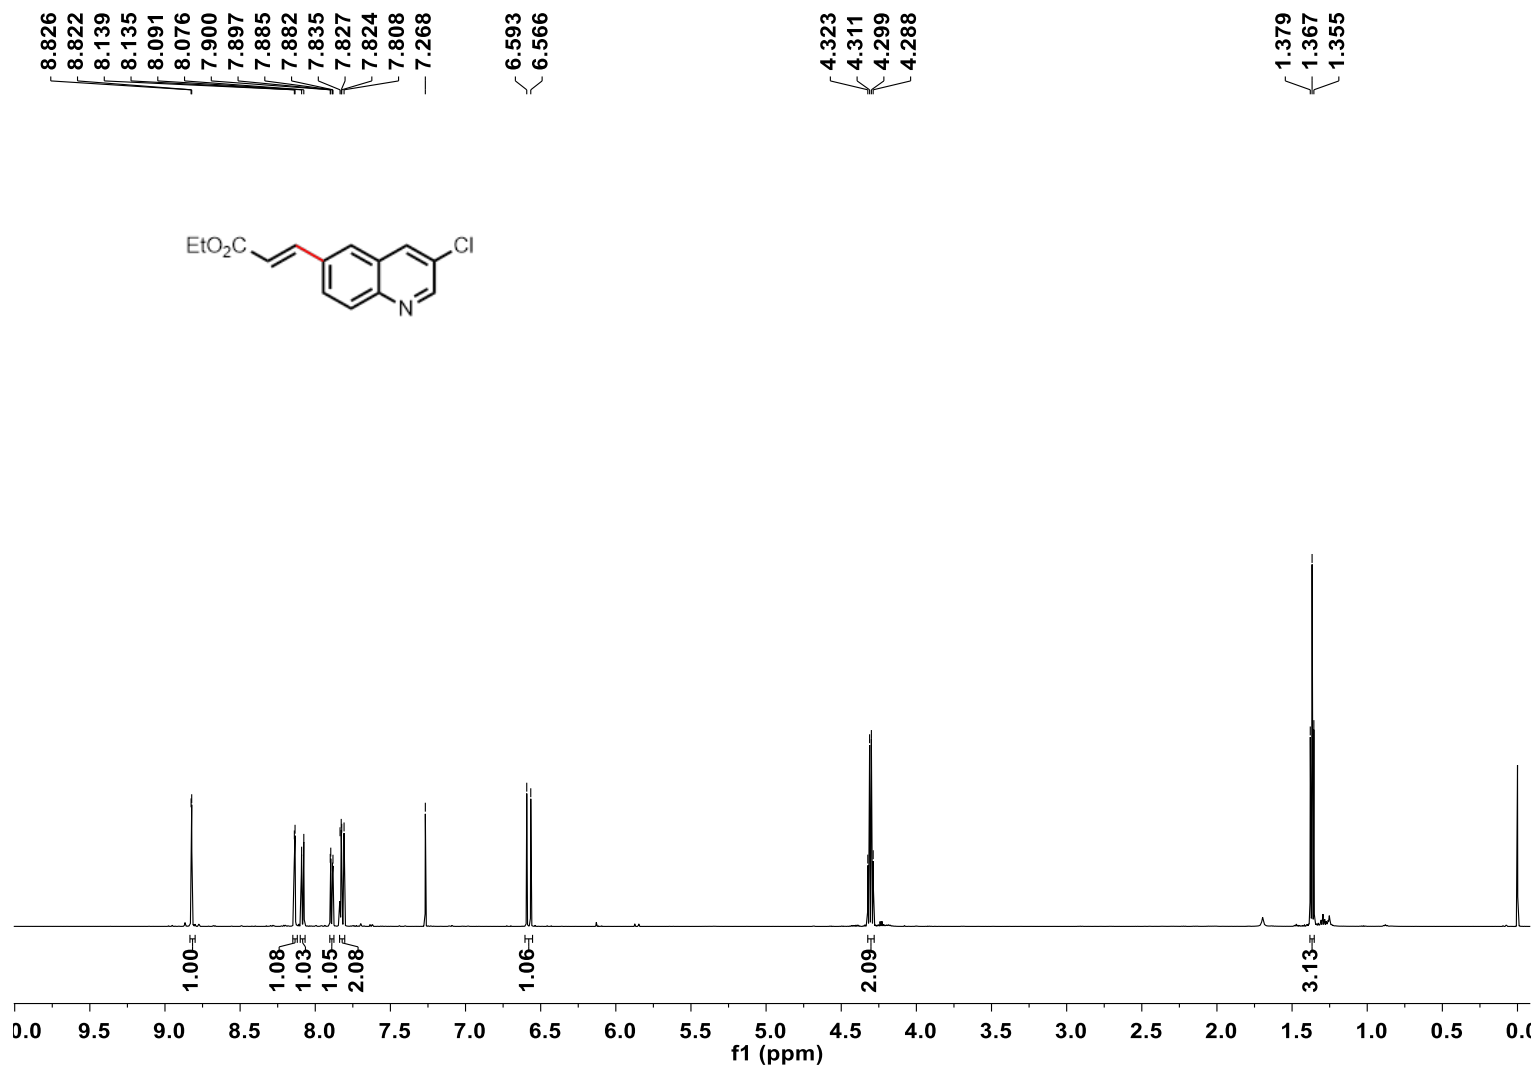

<sup>13</sup>C NMR (151 MHz, CDCl<sub>3</sub>) spectrum of **2e**

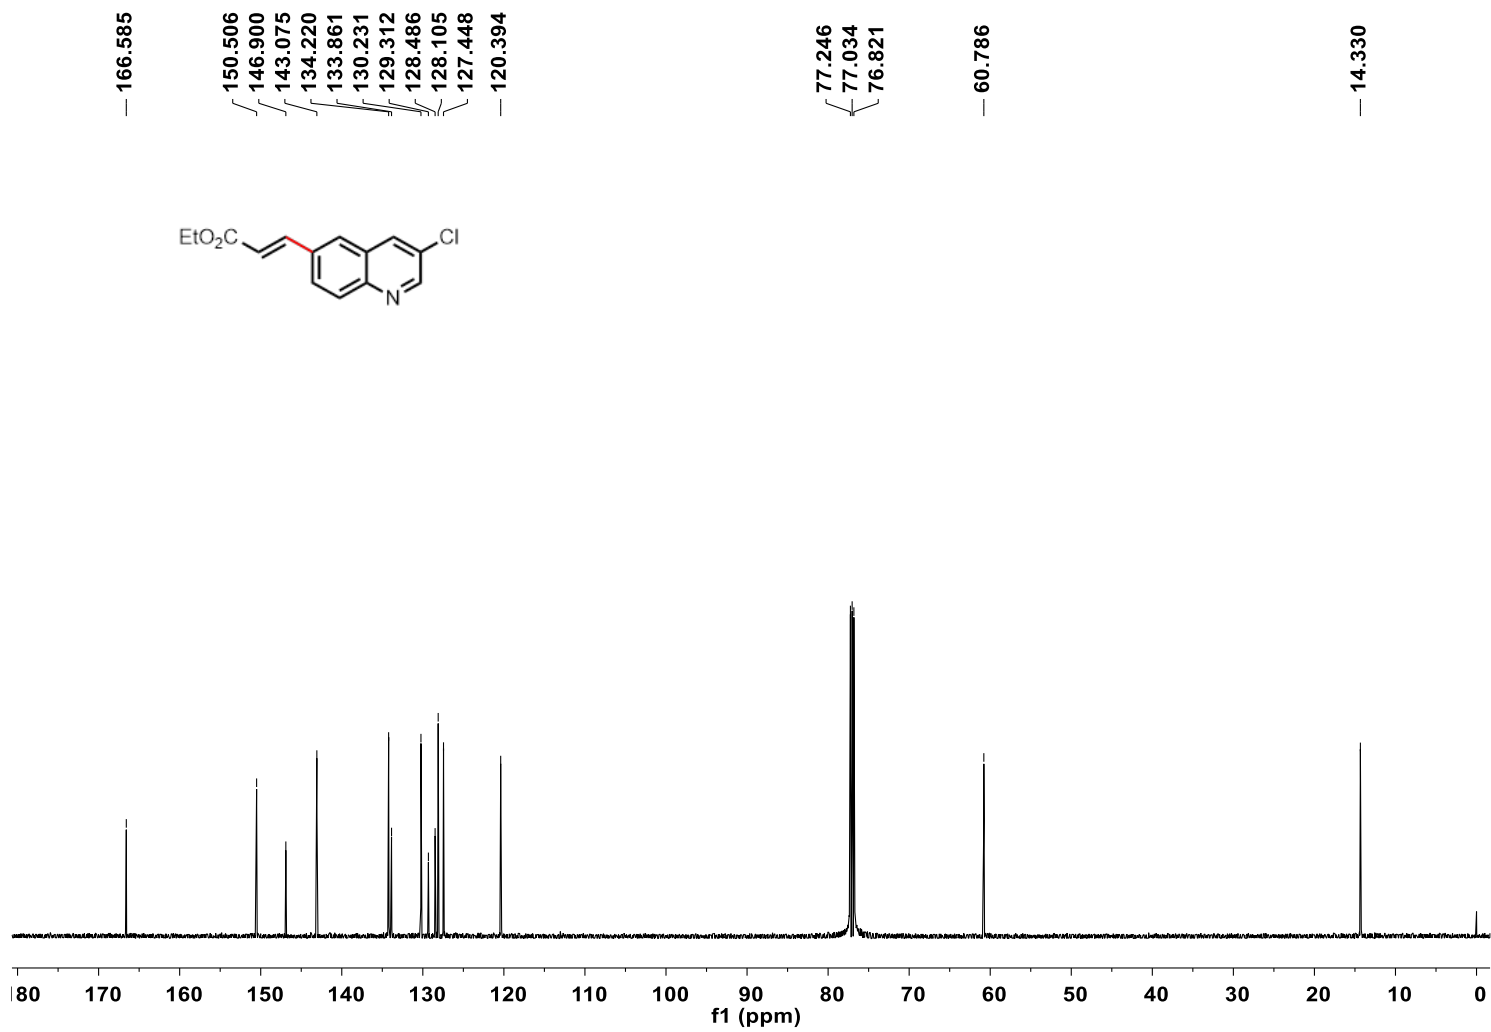

<sup>1</sup>H NMR (600 MHz, CDCl<sub>3</sub>) spectrum of **2f**

9.109  
9.106  
8.458  
8.197  
8.183  
8.048  
8.044  
8.033  
8.030  
8.005  
7.867  
7.841  
— 7.267

6.631  
6.604

4.334  
4.322  
4.310  
4.298

1.386  
1.374  
1.363

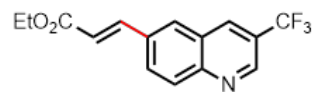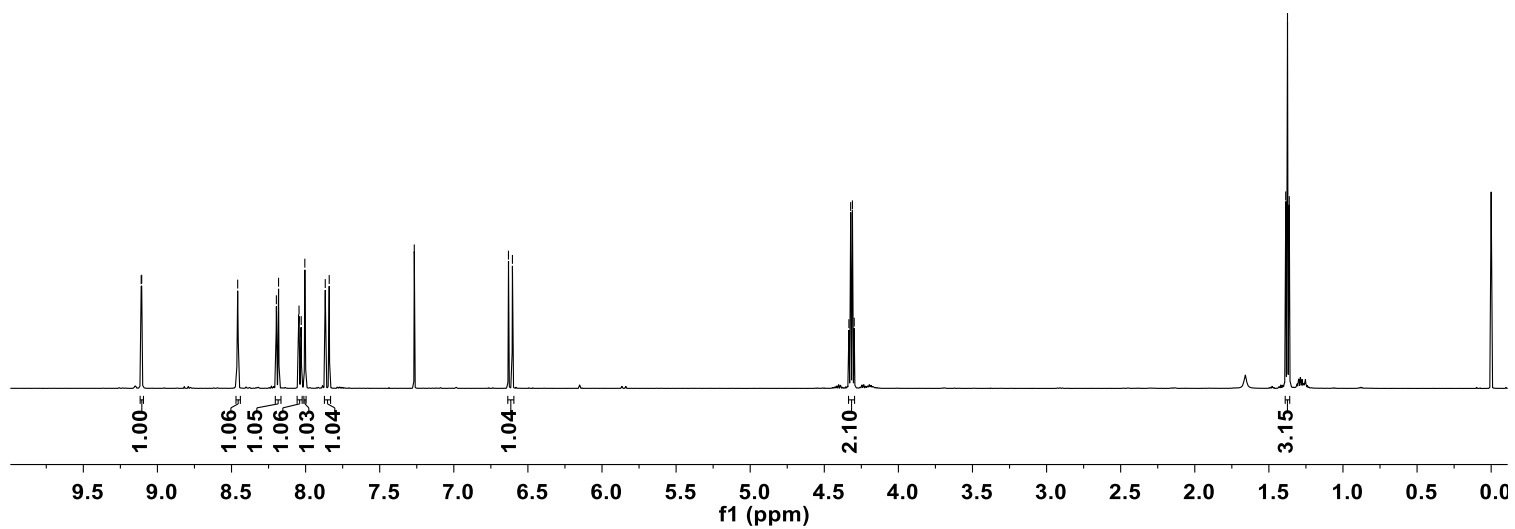

$^{13}\text{C}$  NMR (151 MHz,  $\text{CDCl}_3$ ) spectrum of **2f**

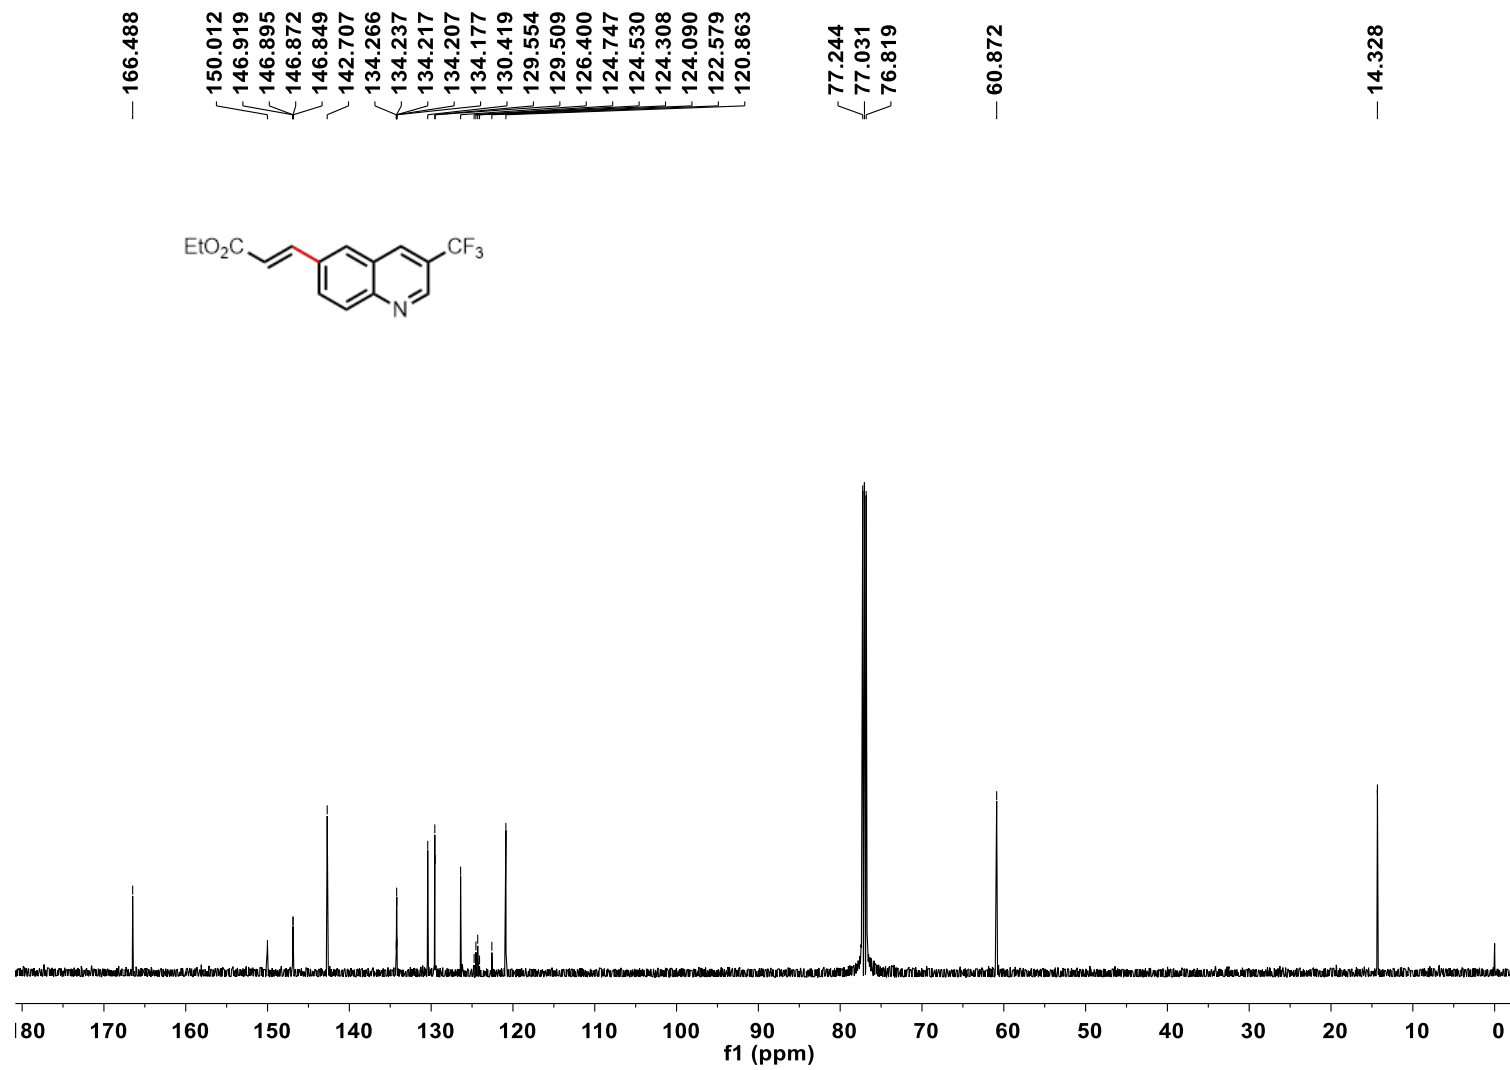

$^{19}\text{F}$  NMR (376 MHz,  $\text{CDCl}_3$ ) spectrum of **2f**

-64.618

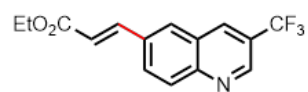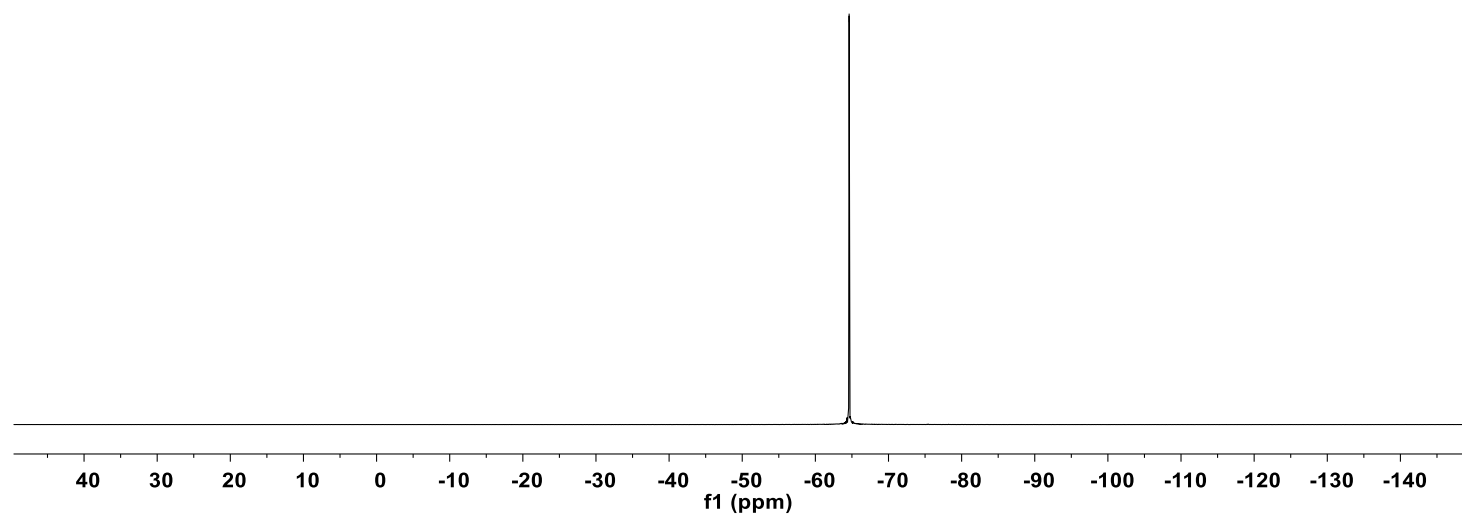



<sup>1</sup>H NMR (600 MHz, CDCl<sub>3</sub>) spectrum of **2g**

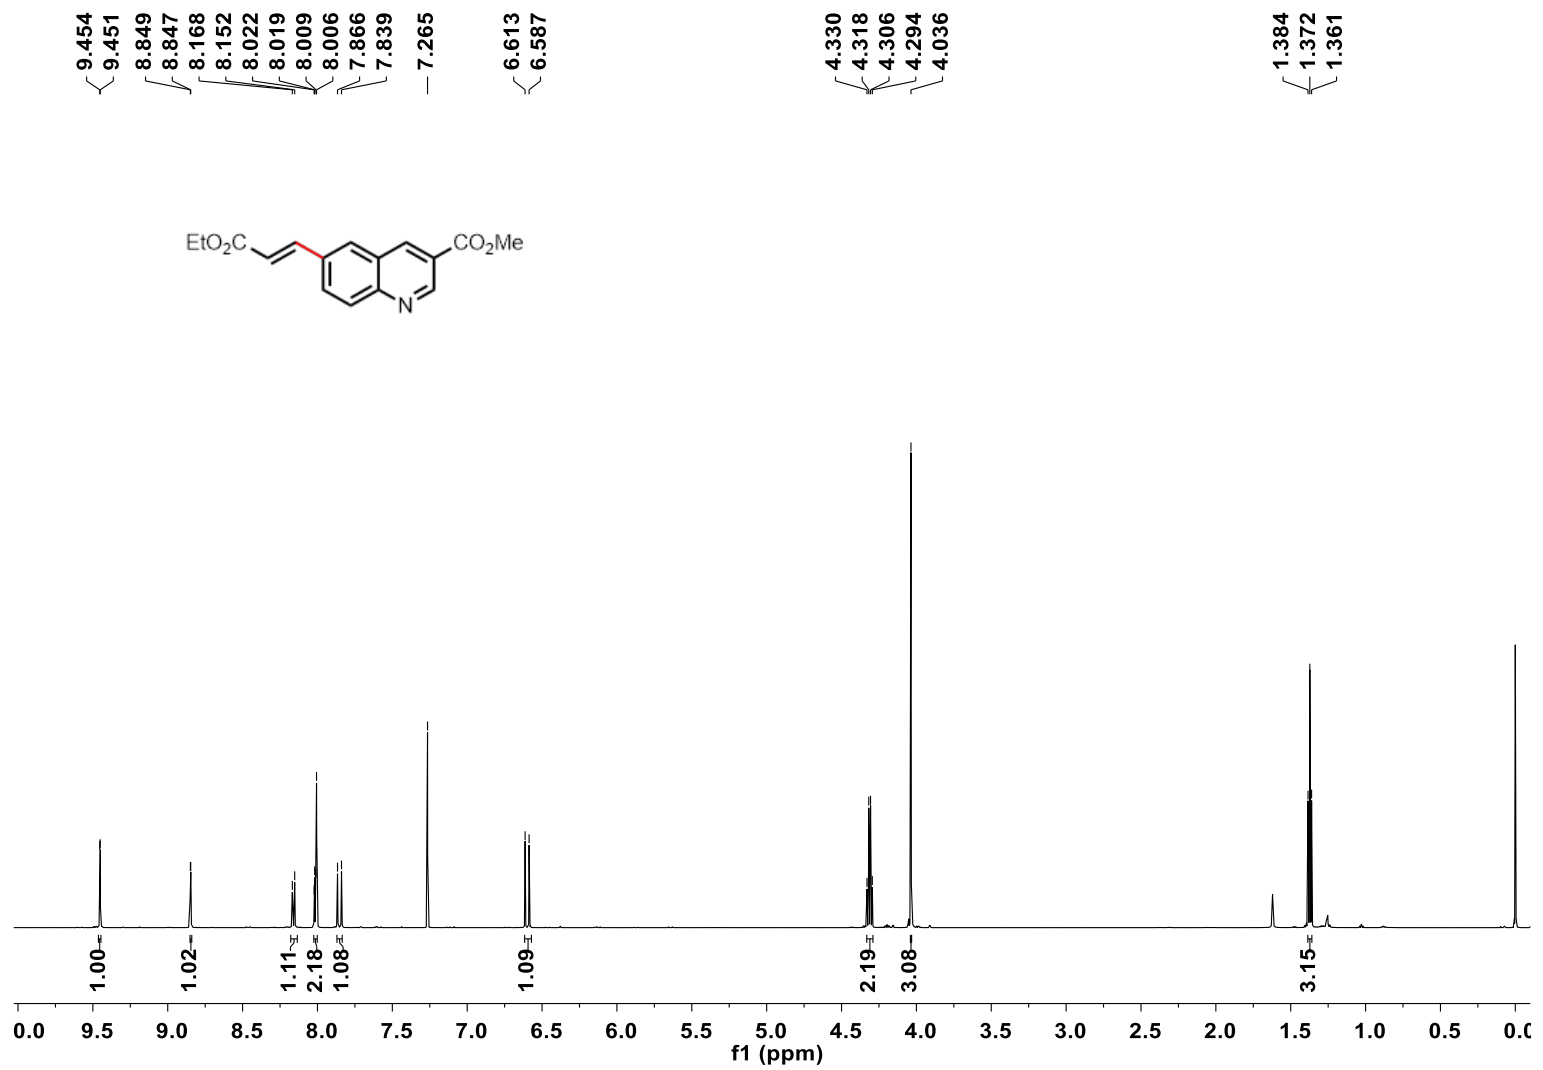

$^{13}\text{C}$  NMR (151 MHz,  $\text{CDCl}_3$ ) spectrum of **2g**

166.574  
165.564

150.891  
150.518  
142.940  
138.981  
133.670  
130.290  
130.093  
129.589  
126.947  
123.774  
120.438

77.236  
77.024  
76.812

60.813  
52.634

14.333

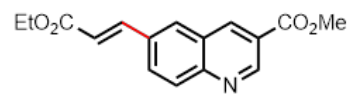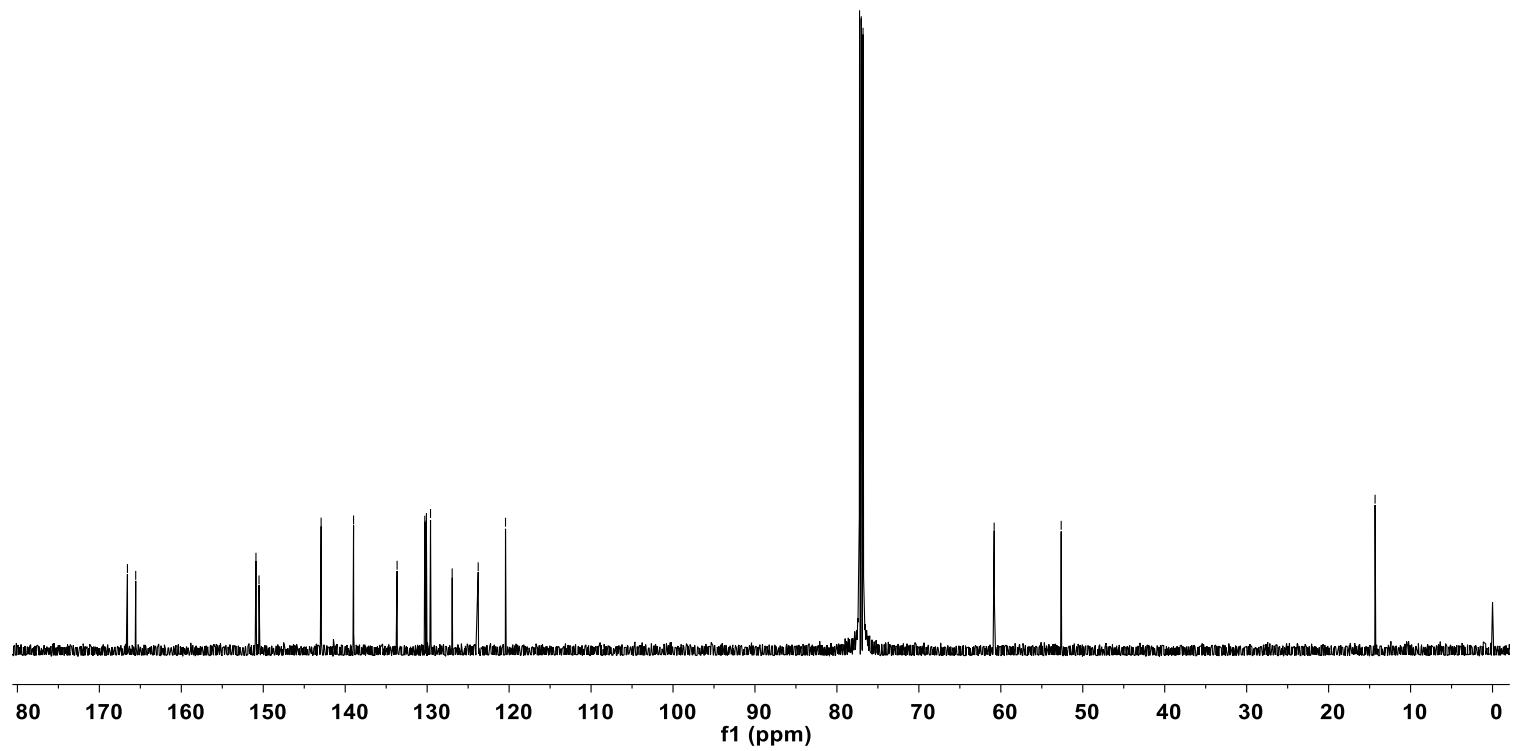

$^1\text{H}$  NMR (600 MHz,  $\text{CDCl}_3$ ) spectrum of **2h**

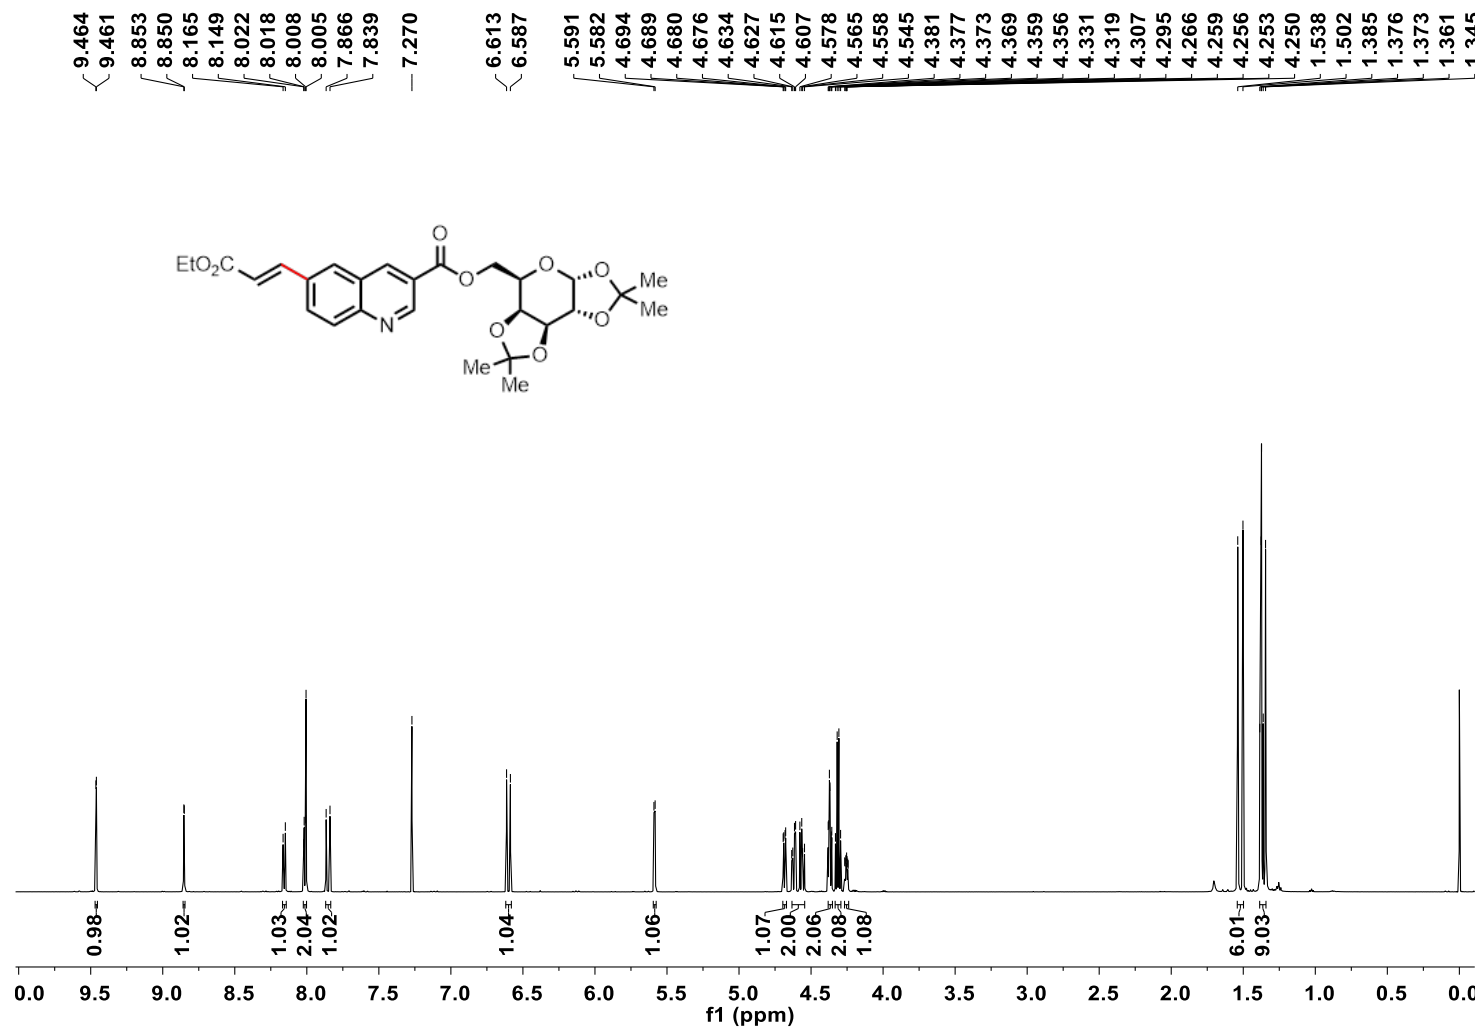

$^{13}\text{C}$  NMR (151 MHz,  $\text{CDCl}_3$ ) spectrum of **2h**

166.577  
164.958

150.968  
150.561

142.955  
139.095

133.639  
130.285

130.149  
129.603

126.923  
123.700

120.415  
109.838

108.887  
96.345

77.247  
77.035

76.822  
71.155

70.787  
70.505

66.126  
64.636

60.803  
26.072

26.004  
24.971

24.507  
14.335

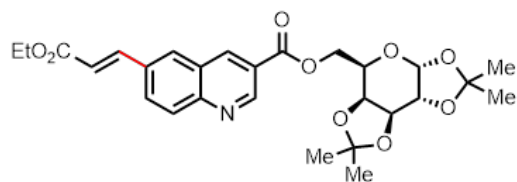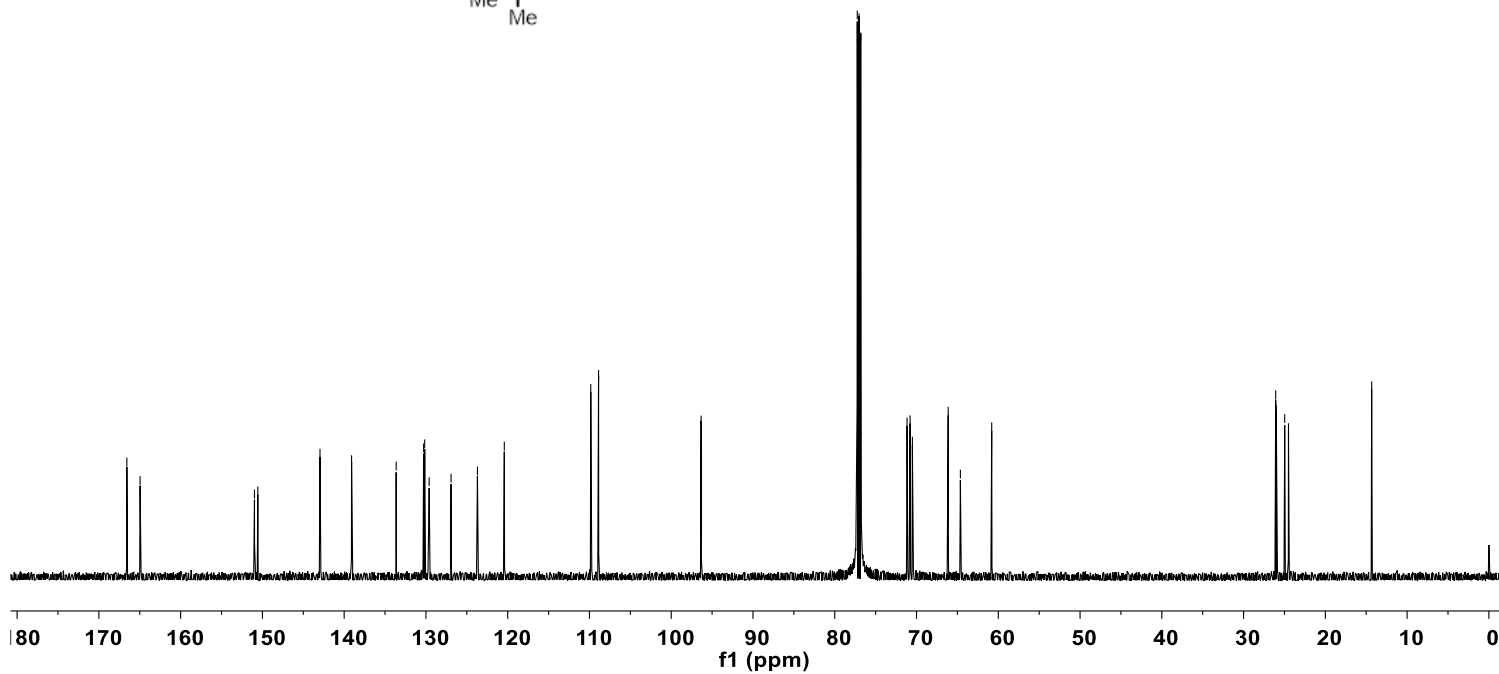

<sup>1</sup>H NMR (600 MHz, CDCl<sub>3</sub>) spectrum of **2i**

8.781  
8.774  
8.093  
8.078  
8.072  
8.069  
7.903  
7.900  
7.891  
7.885  
7.865  
7.270  
7.262  
7.255

6.593  
6.566

4.324  
4.312  
4.300  
4.288

2.725  
2.724  
2.722

1.382  
1.370  
1.359

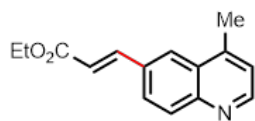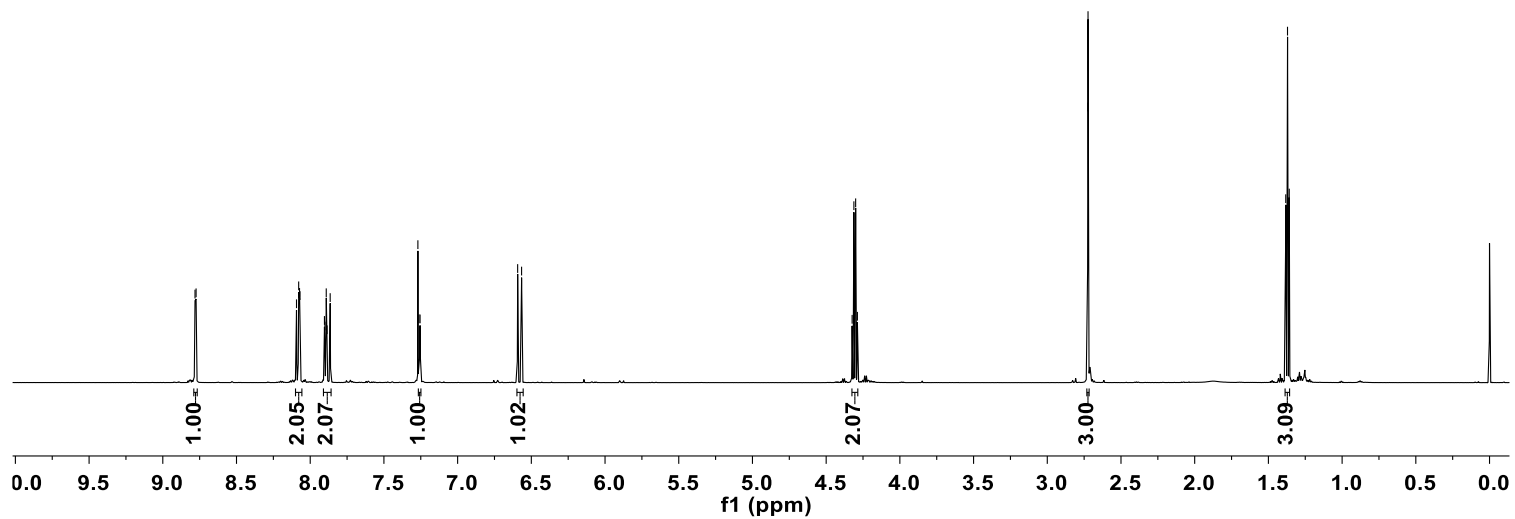

<sup>13</sup>C NMR (151 MHz, CDCl<sub>3</sub>) spectrum of **2i**

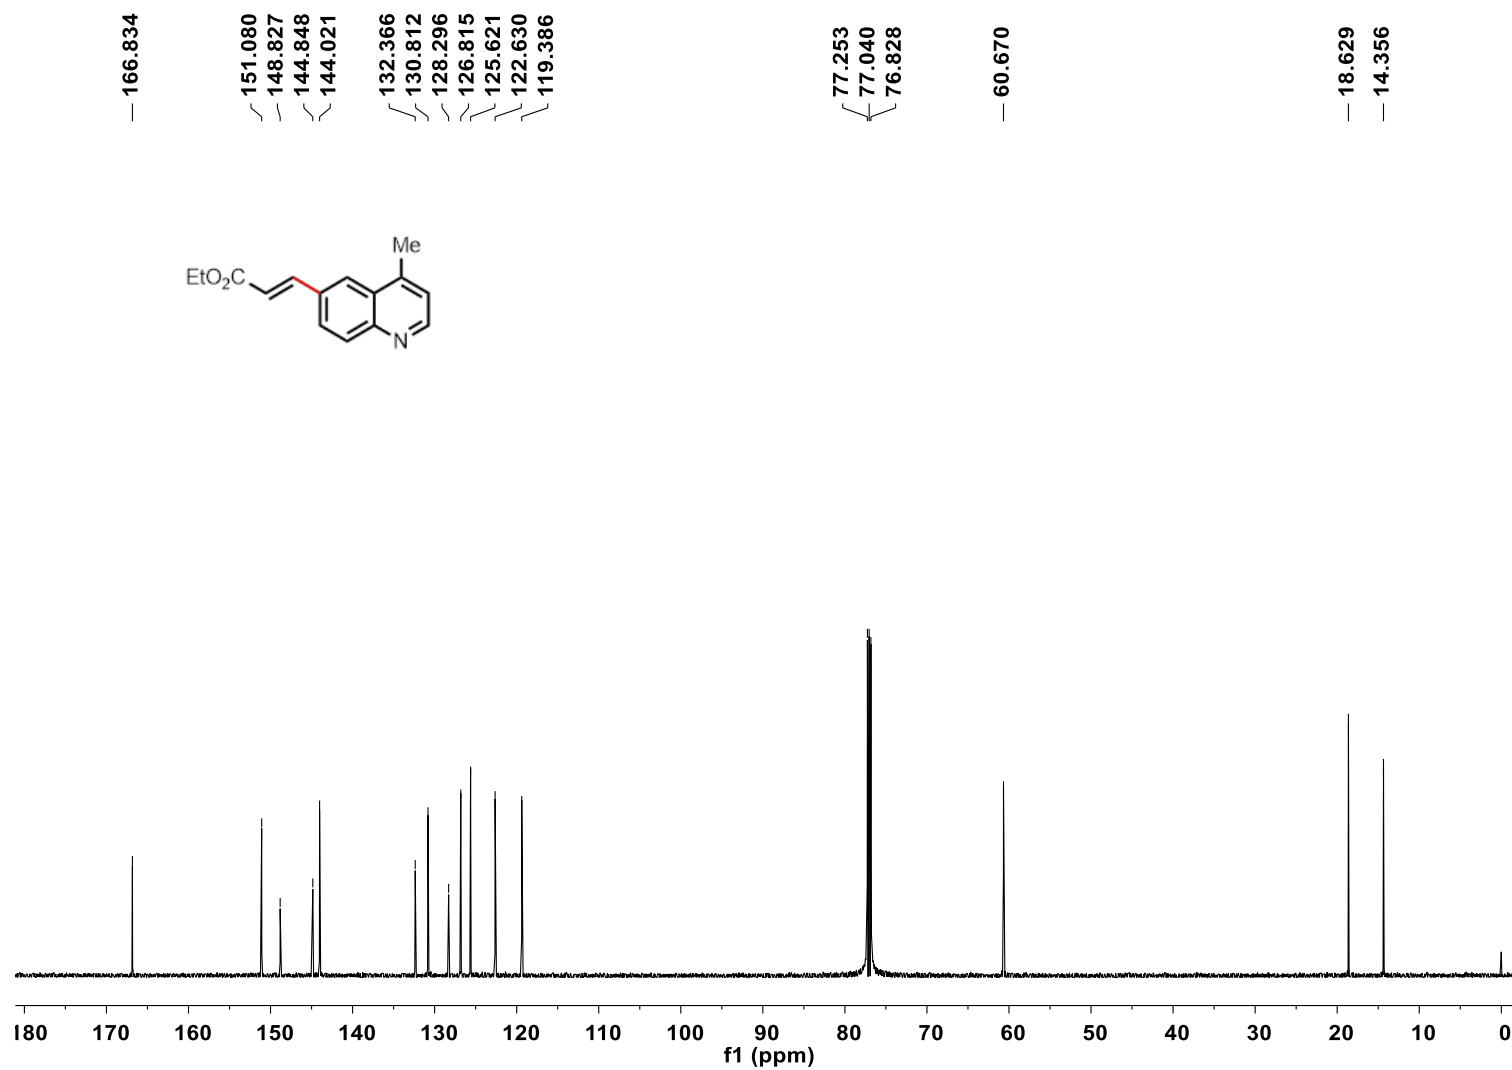

<sup>1</sup>H NMR (600 MHz, CDCl<sub>3</sub>) spectrum of **2j**

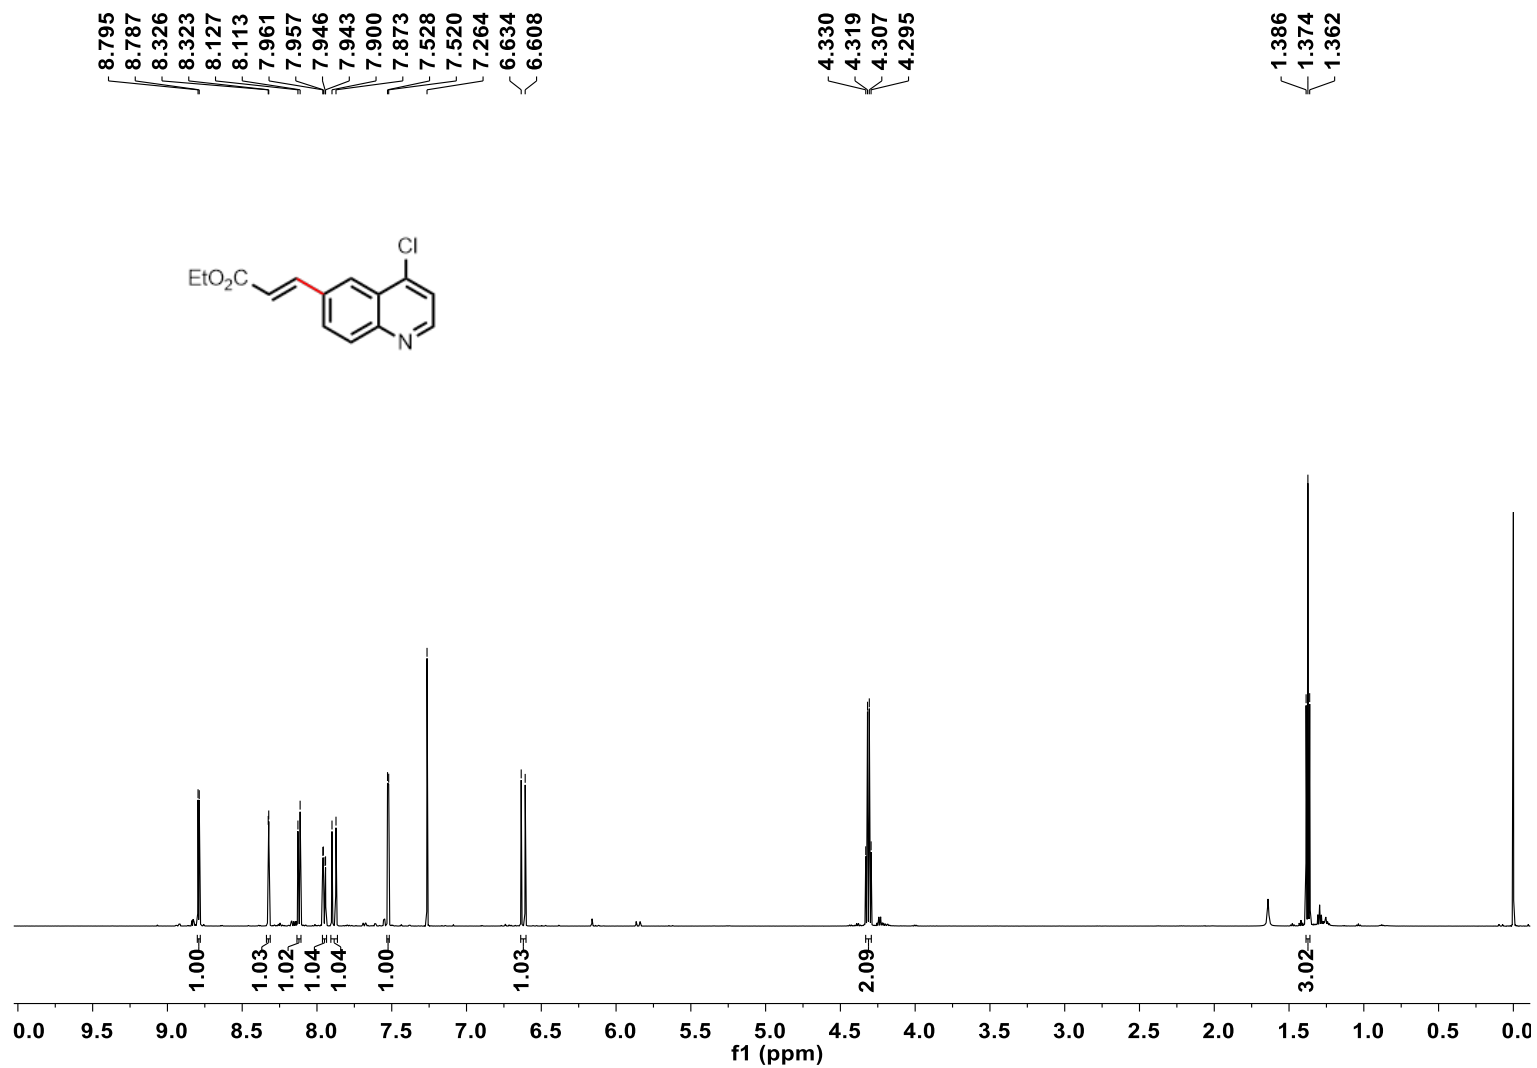

<sup>13</sup>C NMR (151 MHz, CDCl<sub>3</sub>) spectrum of **2j**

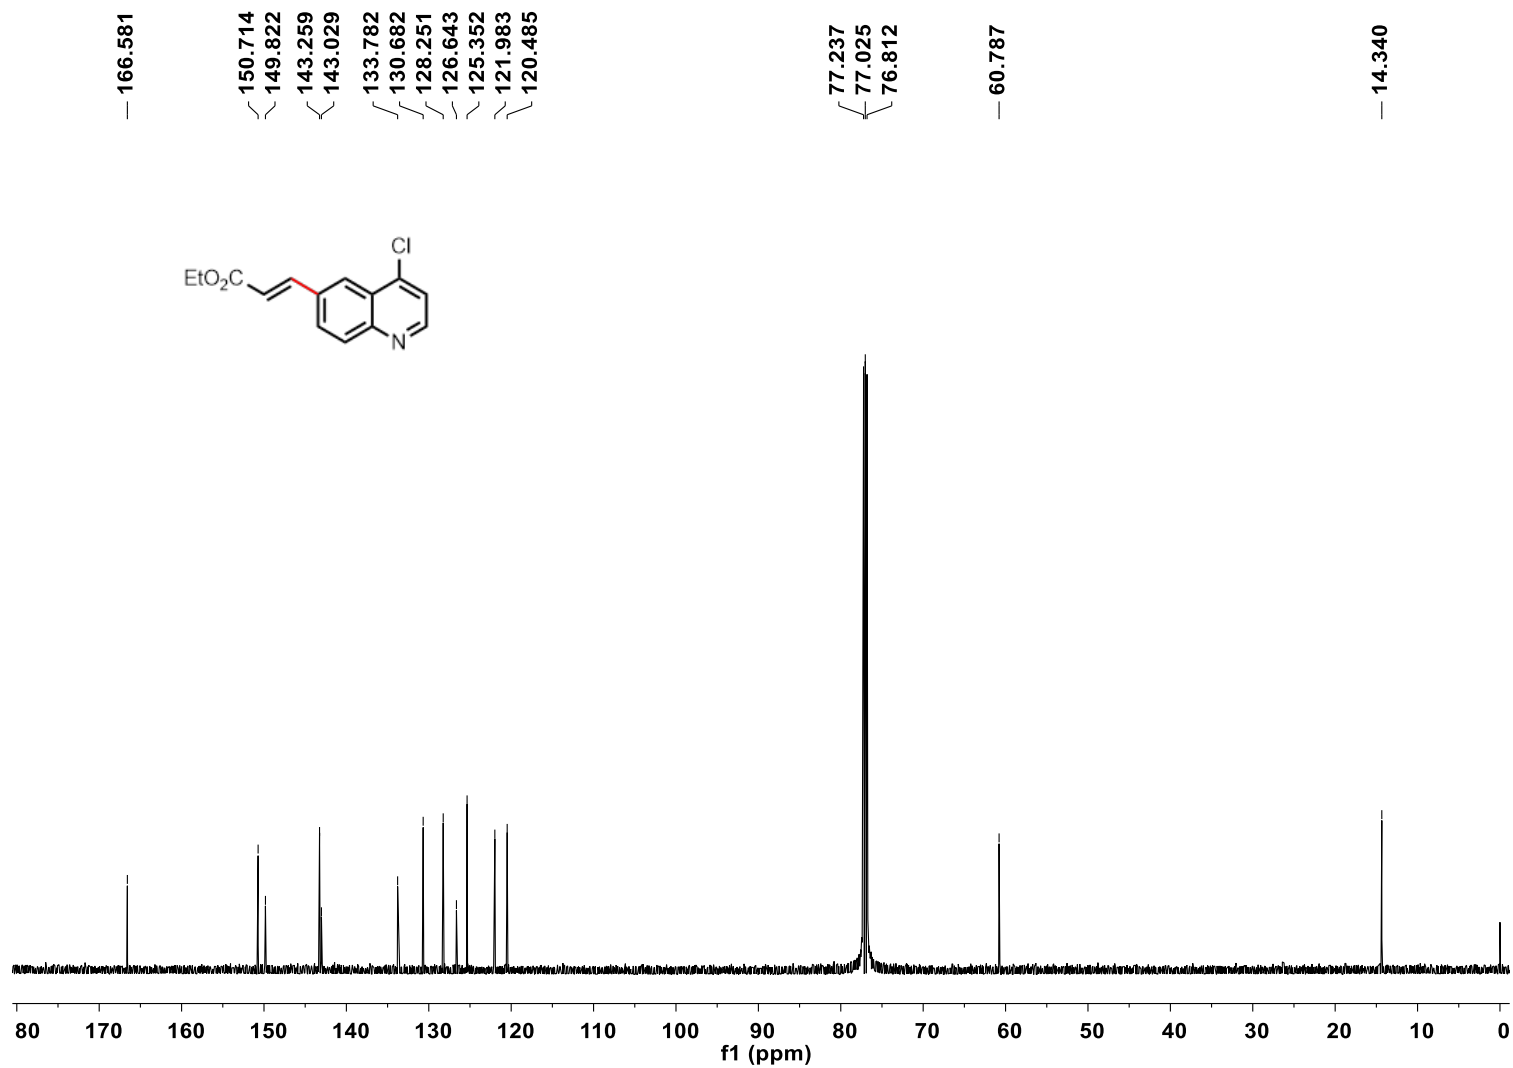



<sup>1</sup>H NMR (600 MHz, CDCl<sub>3</sub>) spectrum of **2k**

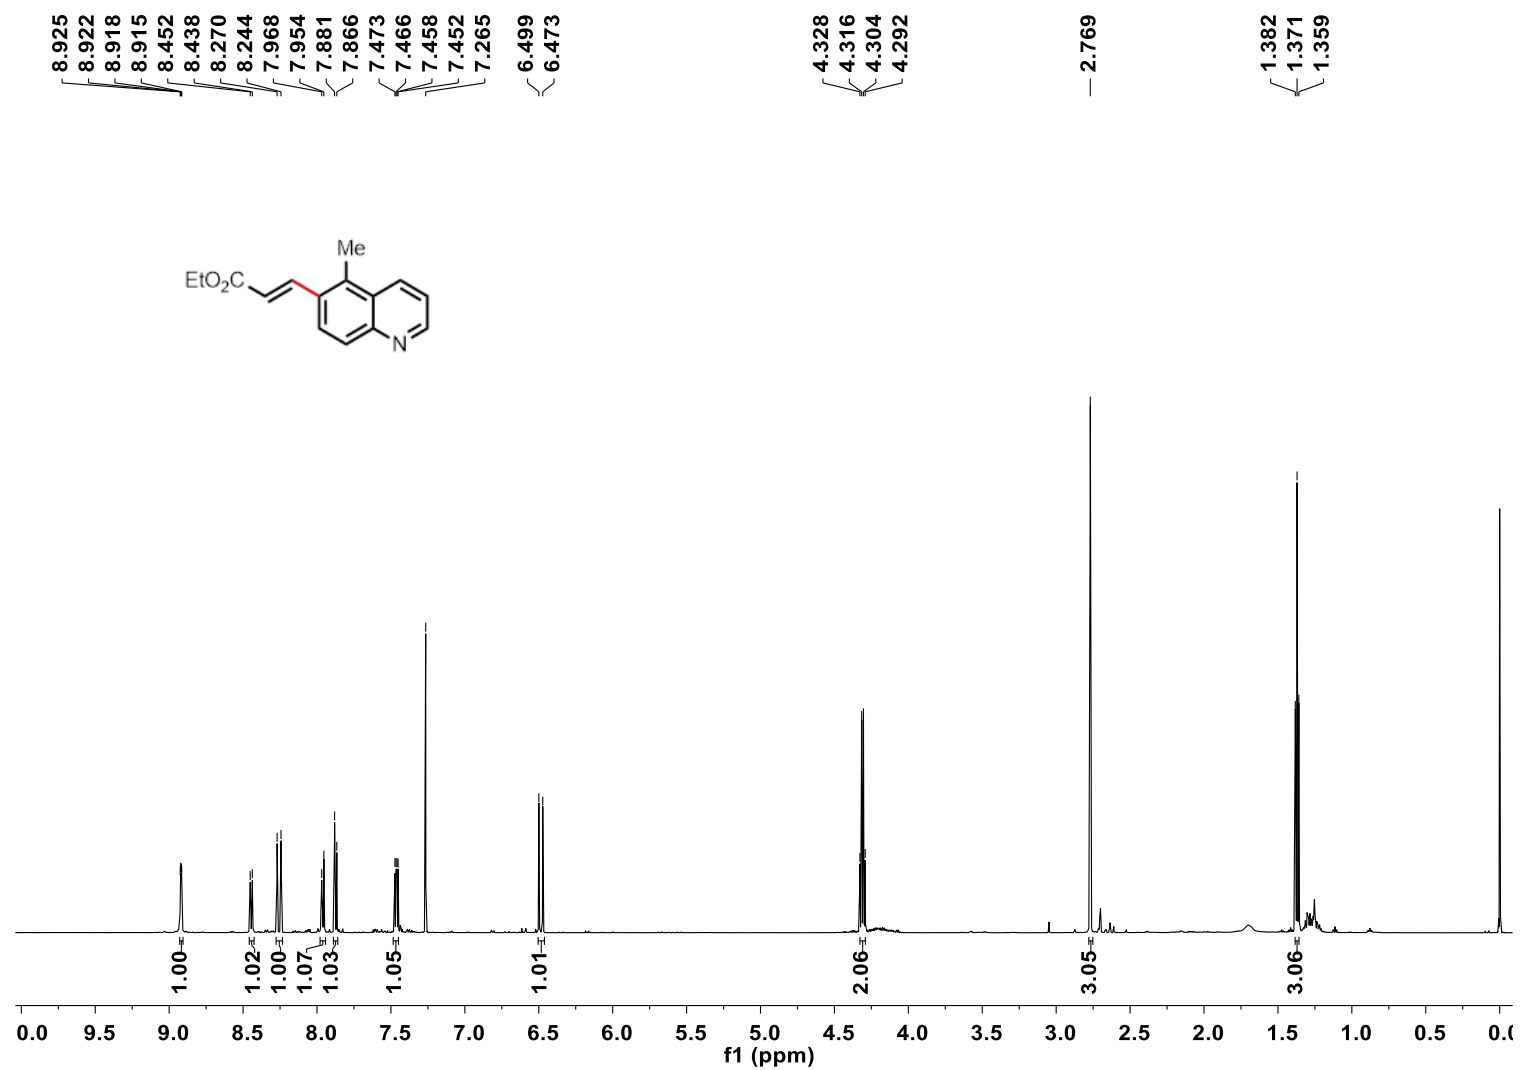

<sup>13</sup>C NMR (151 MHz, CDCl<sub>3</sub>) spectrum of **2k**

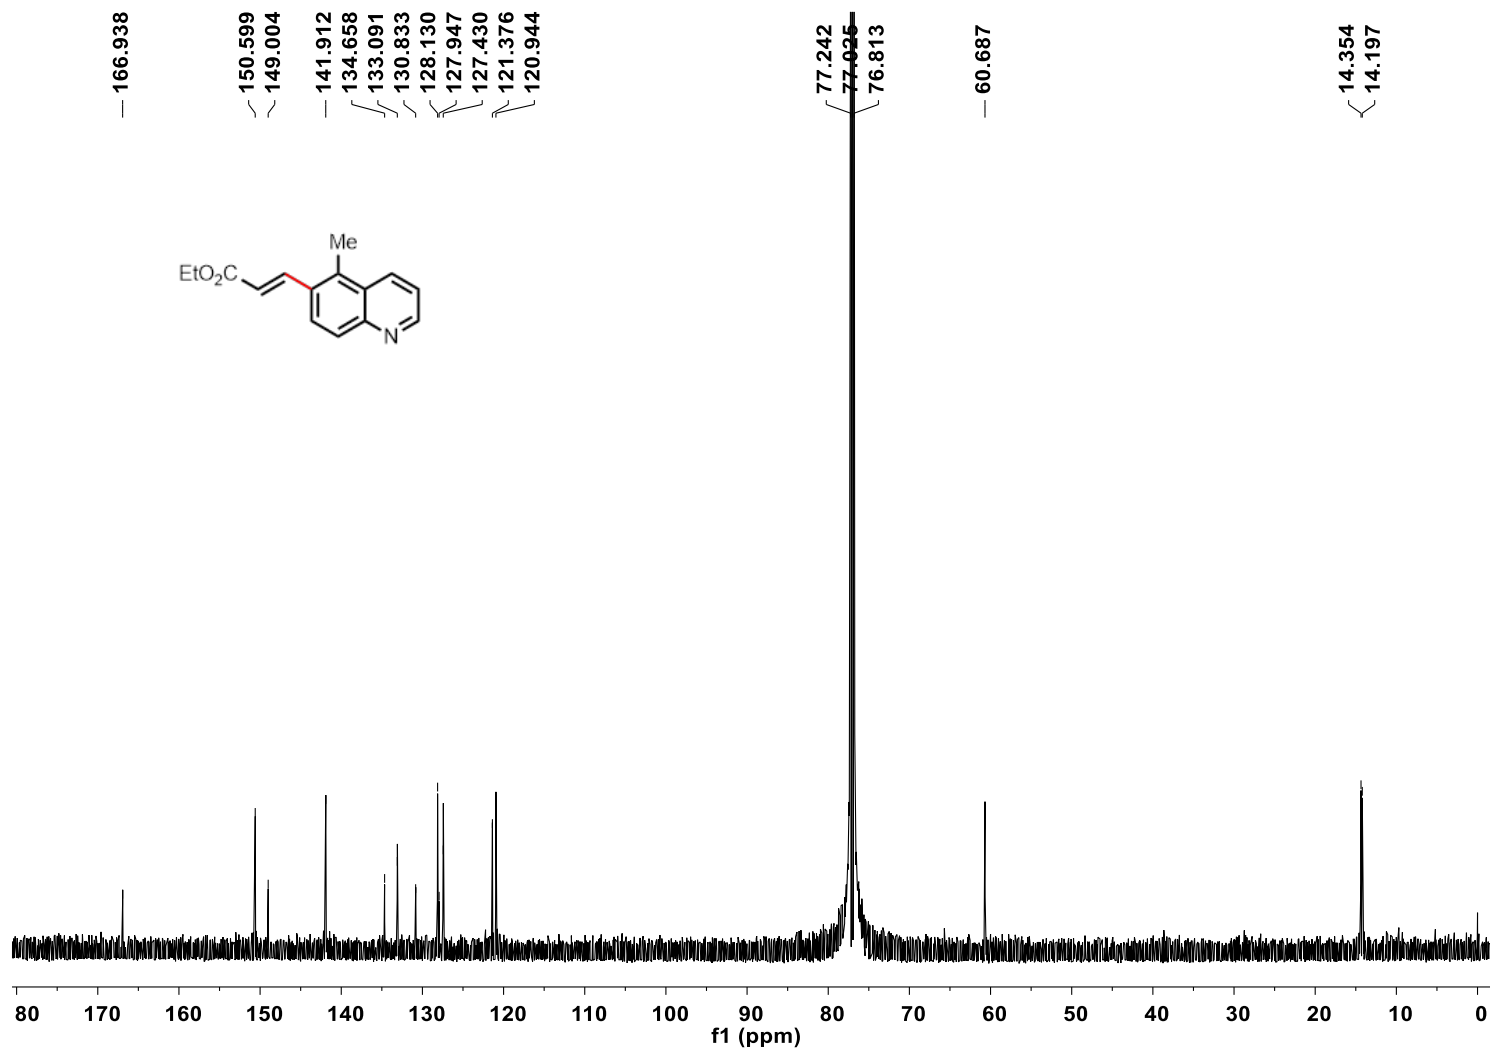



<sup>1</sup>H NMR (600 MHz, CDCl<sub>3</sub>) spectrum of **21**

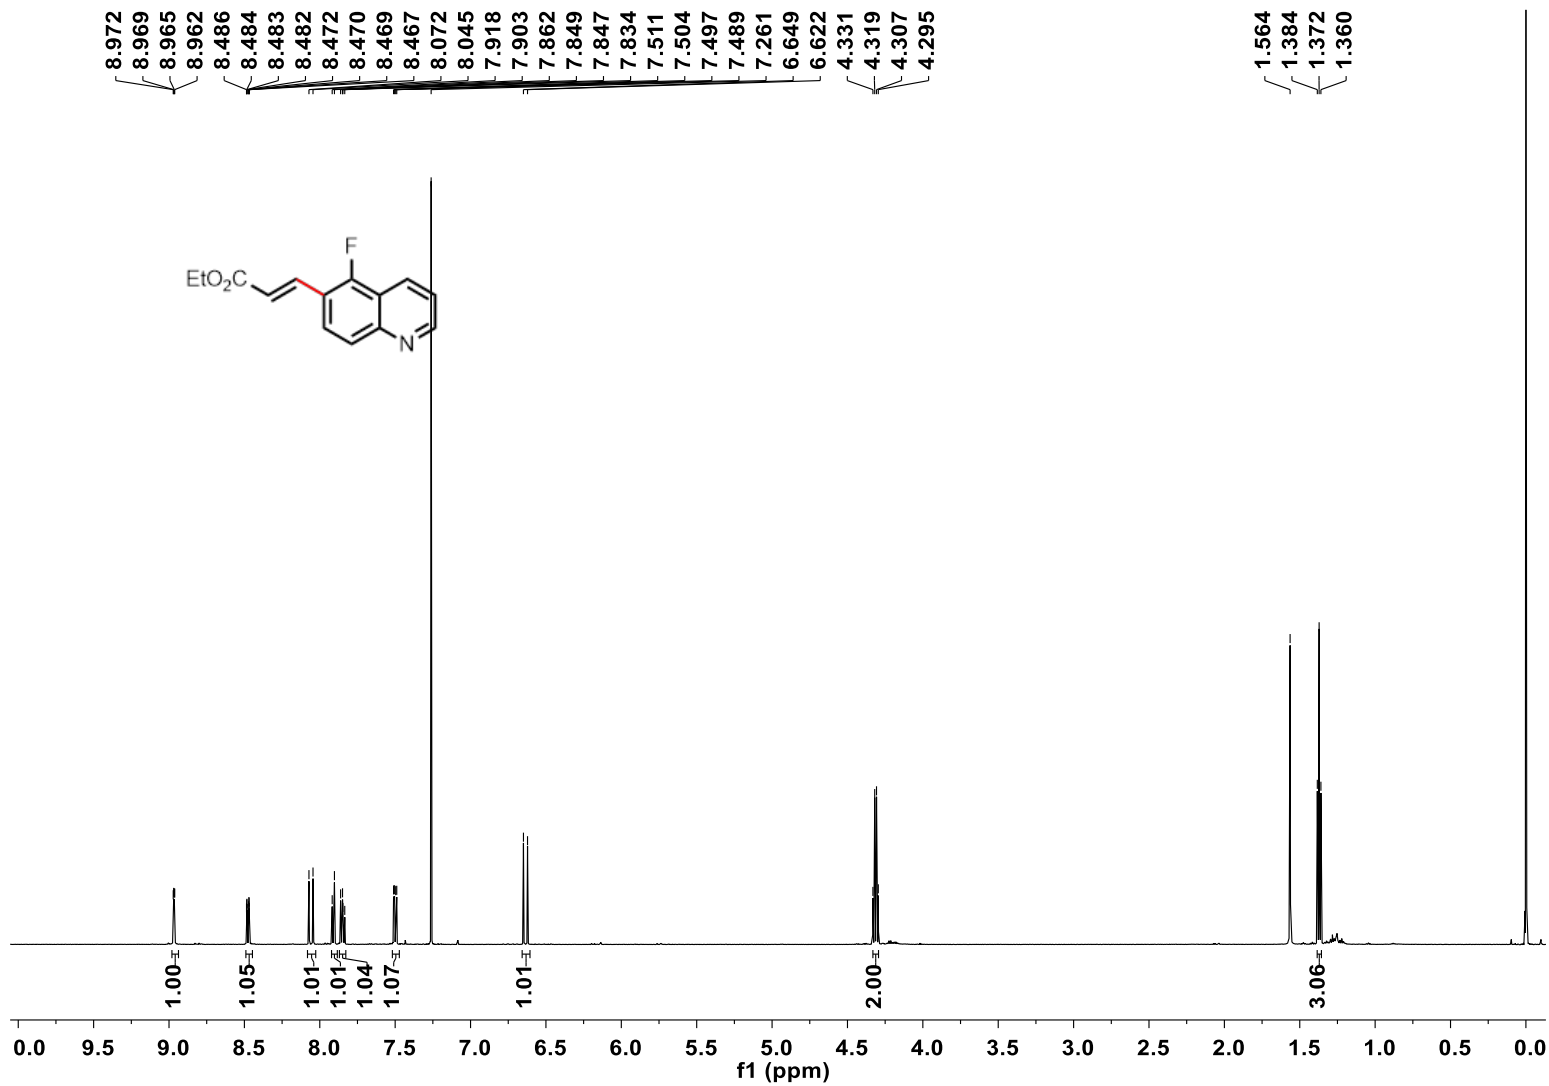

<sup>13</sup>C NMR (151 MHz, CDCl<sub>3</sub>) spectrum of **2I**

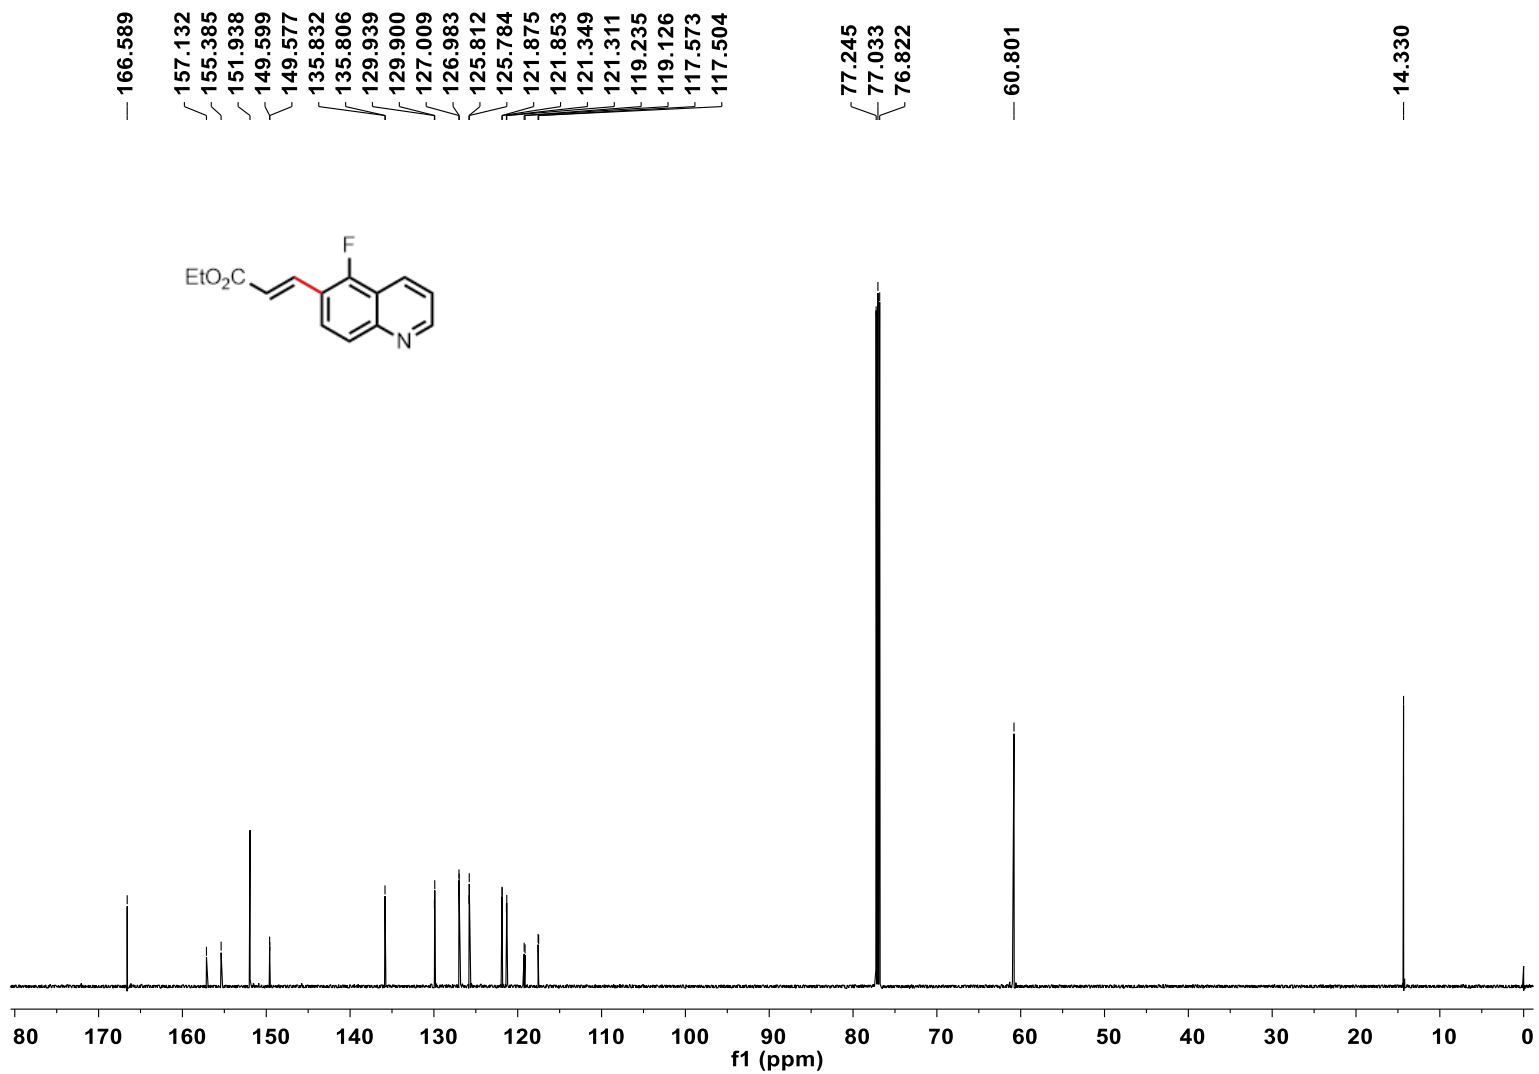

$^{19}\text{F}$  NMR (376 MHz,  $\text{CDCl}_3$ ) spectrum of **2I**

-125.877

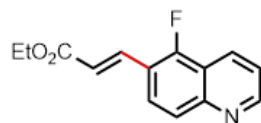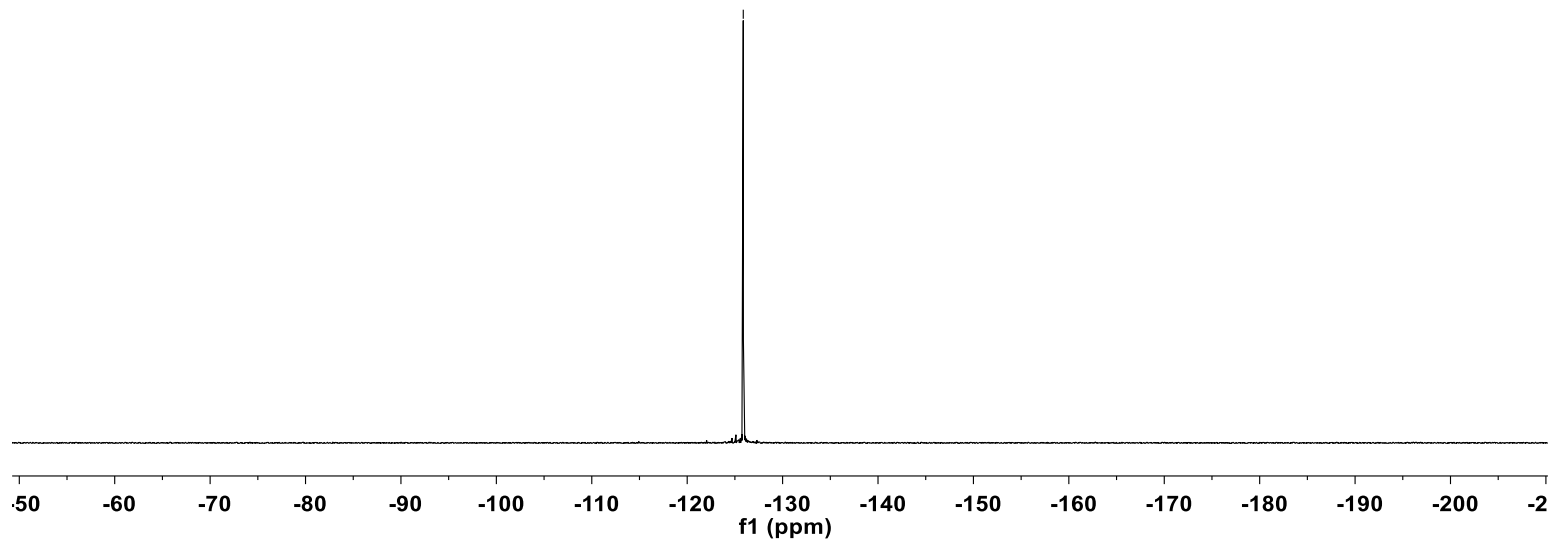

<sup>1</sup>H NMR (600 MHz, CDCl<sub>3</sub>) spectrum of **2m**

8.970  
8.967  
8.963  
8.960  
8.687  
8.686  
8.684  
8.683  
8.673  
8.671  
8.670  
8.669  
8.360  
8.334  
8.040  
8.025  
7.941  
7.926  
7.557  
7.550  
7.543  
7.536  
7.263  
6.596  
6.569

4.341  
4.329  
4.317  
4.306

1.389  
1.377  
1.366

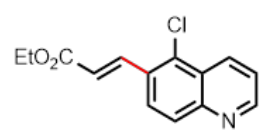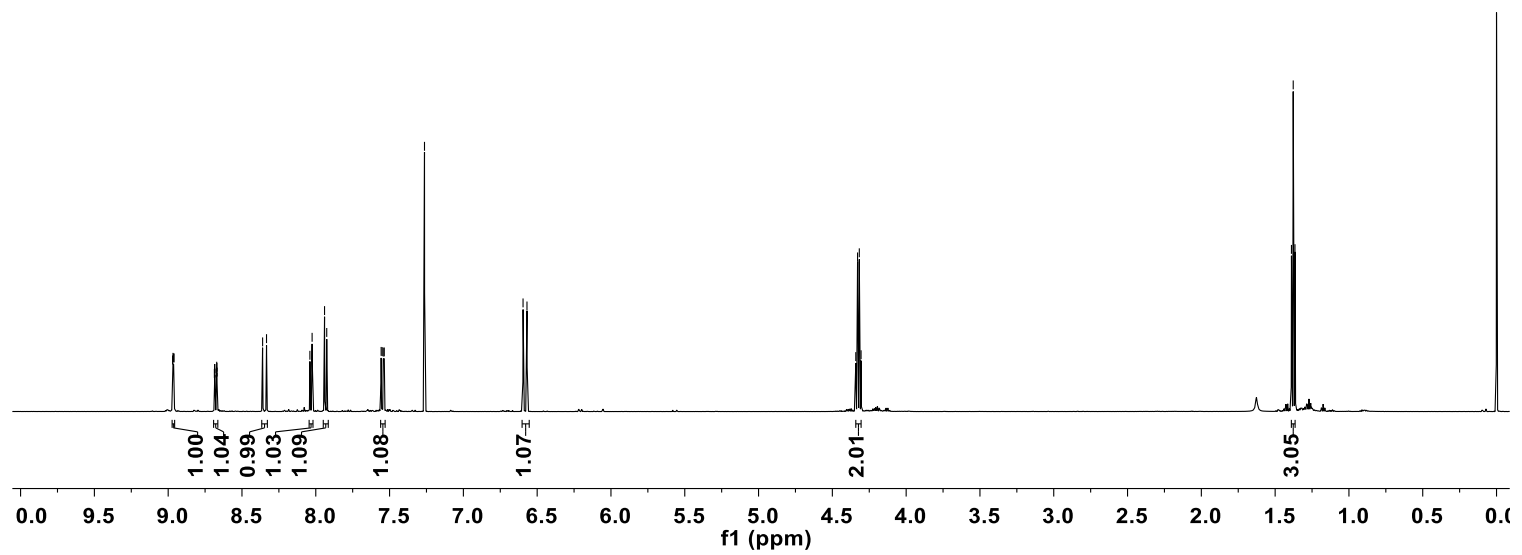

<sup>13</sup>C NMR (151 MHz, CDCl<sub>3</sub>) spectrum of **2m**

— 166.391  
— 151.611  
— 149.320  
— 139.965  
— 133.694  
— 132.483  
— 130.438  
— 128.900  
— 127.011  
— 126.895  
— 122.502  
— 122.285  
  
— 77.235  
— 77.023  
— 76.810  
  
— 60.884  
  
— 14.329

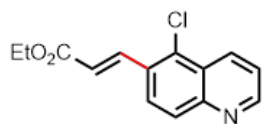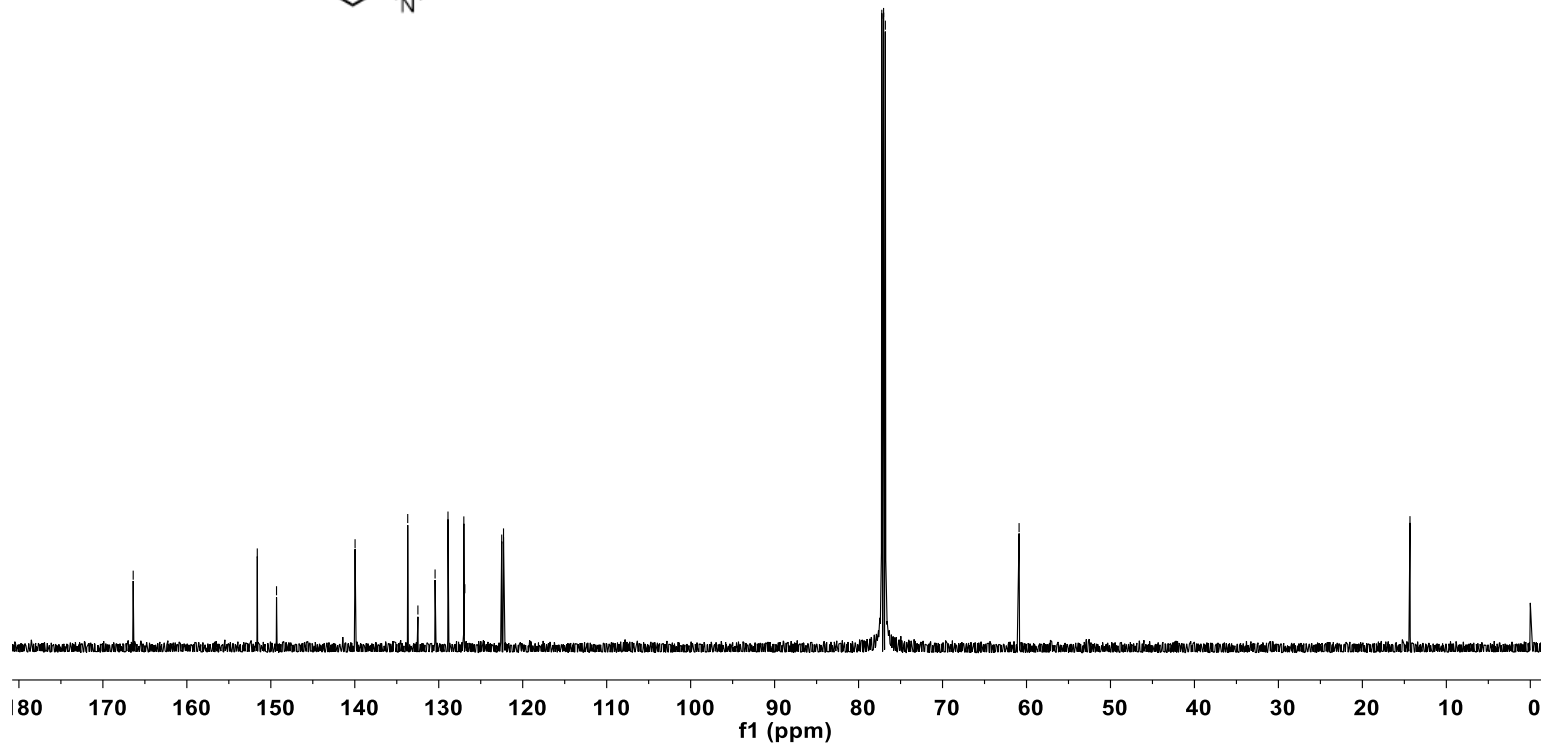



<sup>1</sup>H NMR (600 MHz, CDCl<sub>3</sub>) spectrum of **2n**

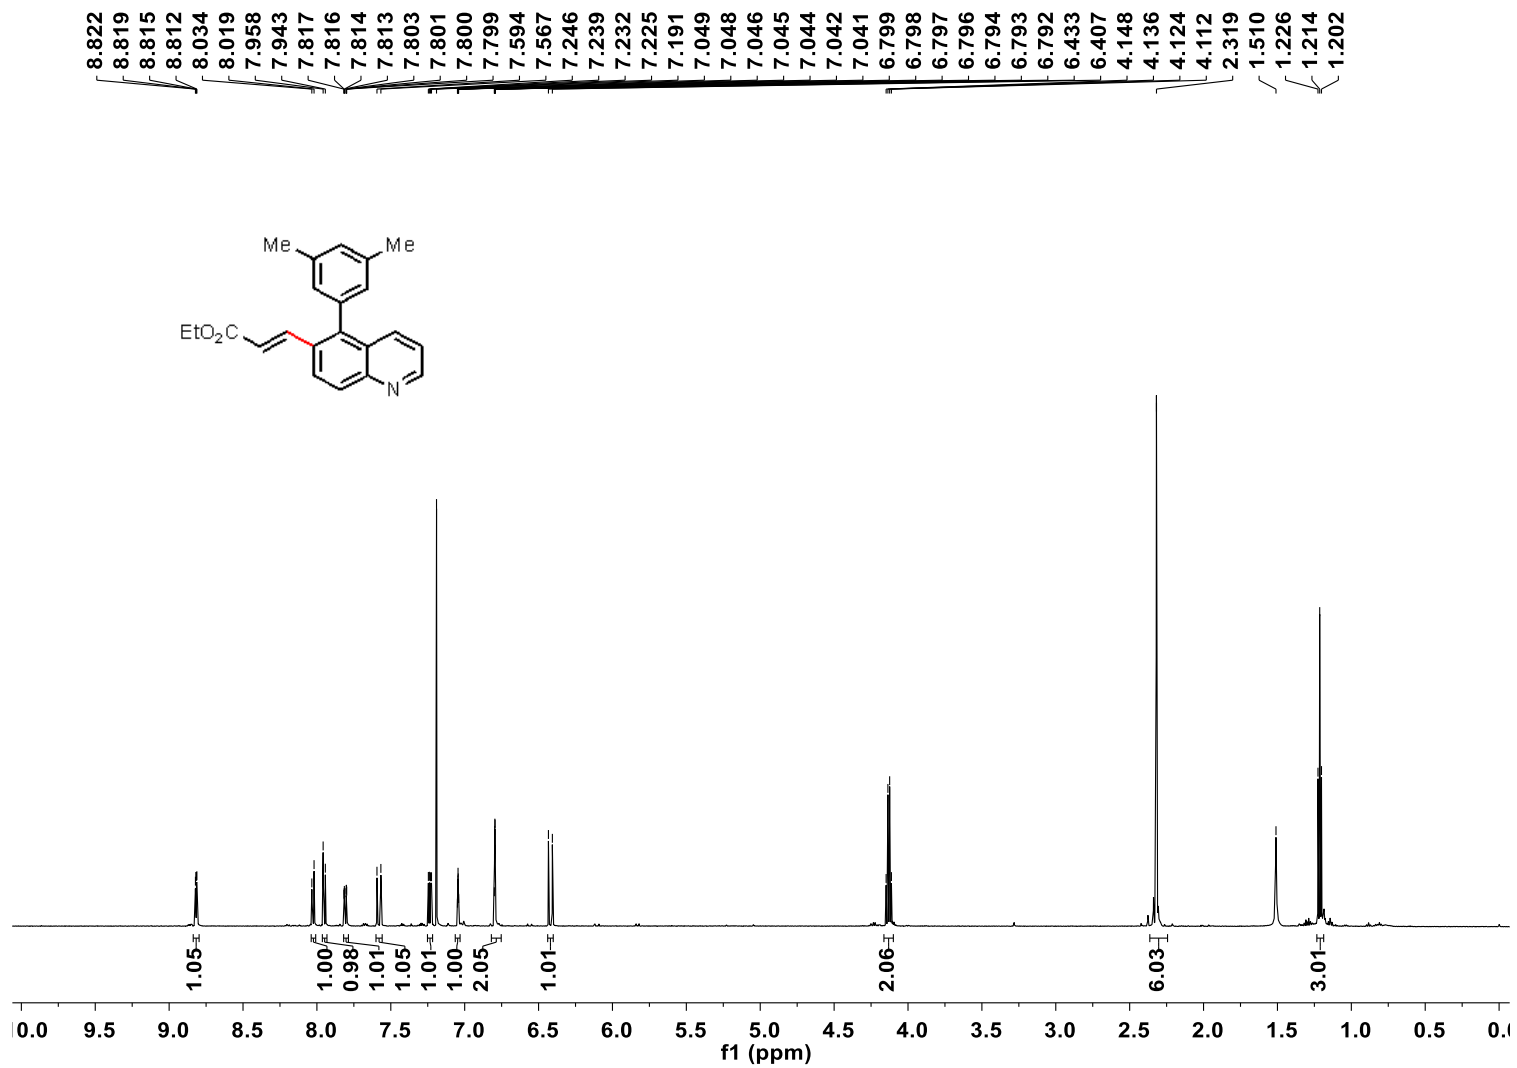

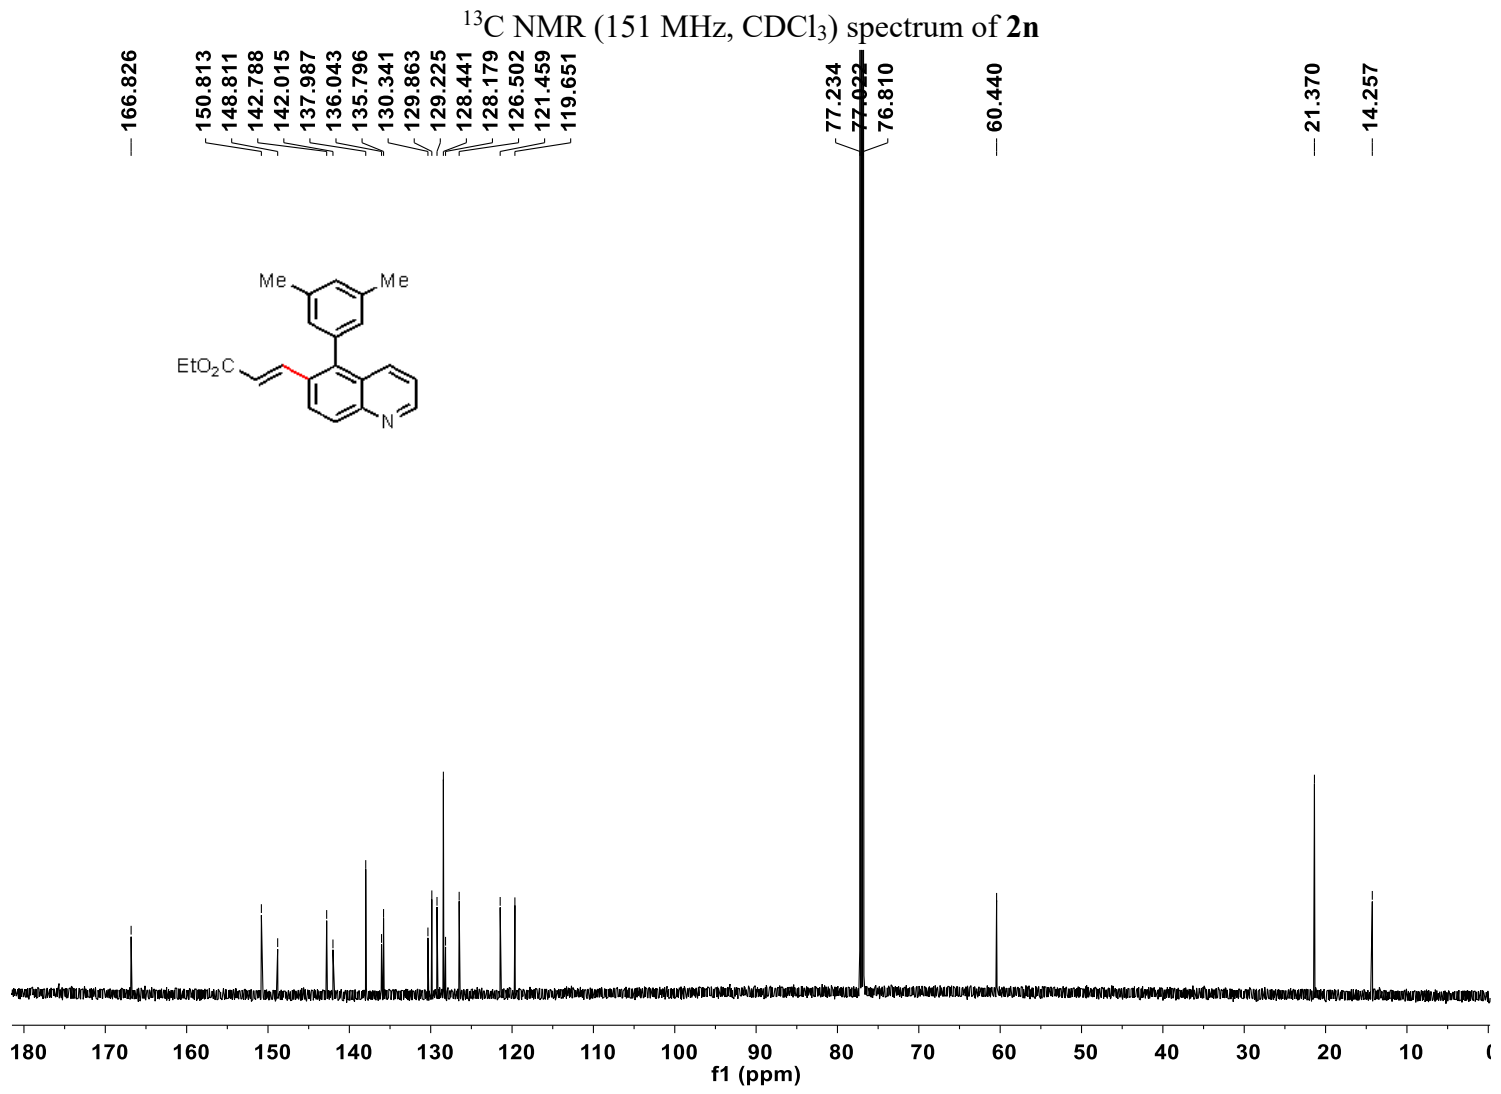

<sup>1</sup>H NMR (600 MHz, CDCl<sub>3</sub>) spectrum of **2o**

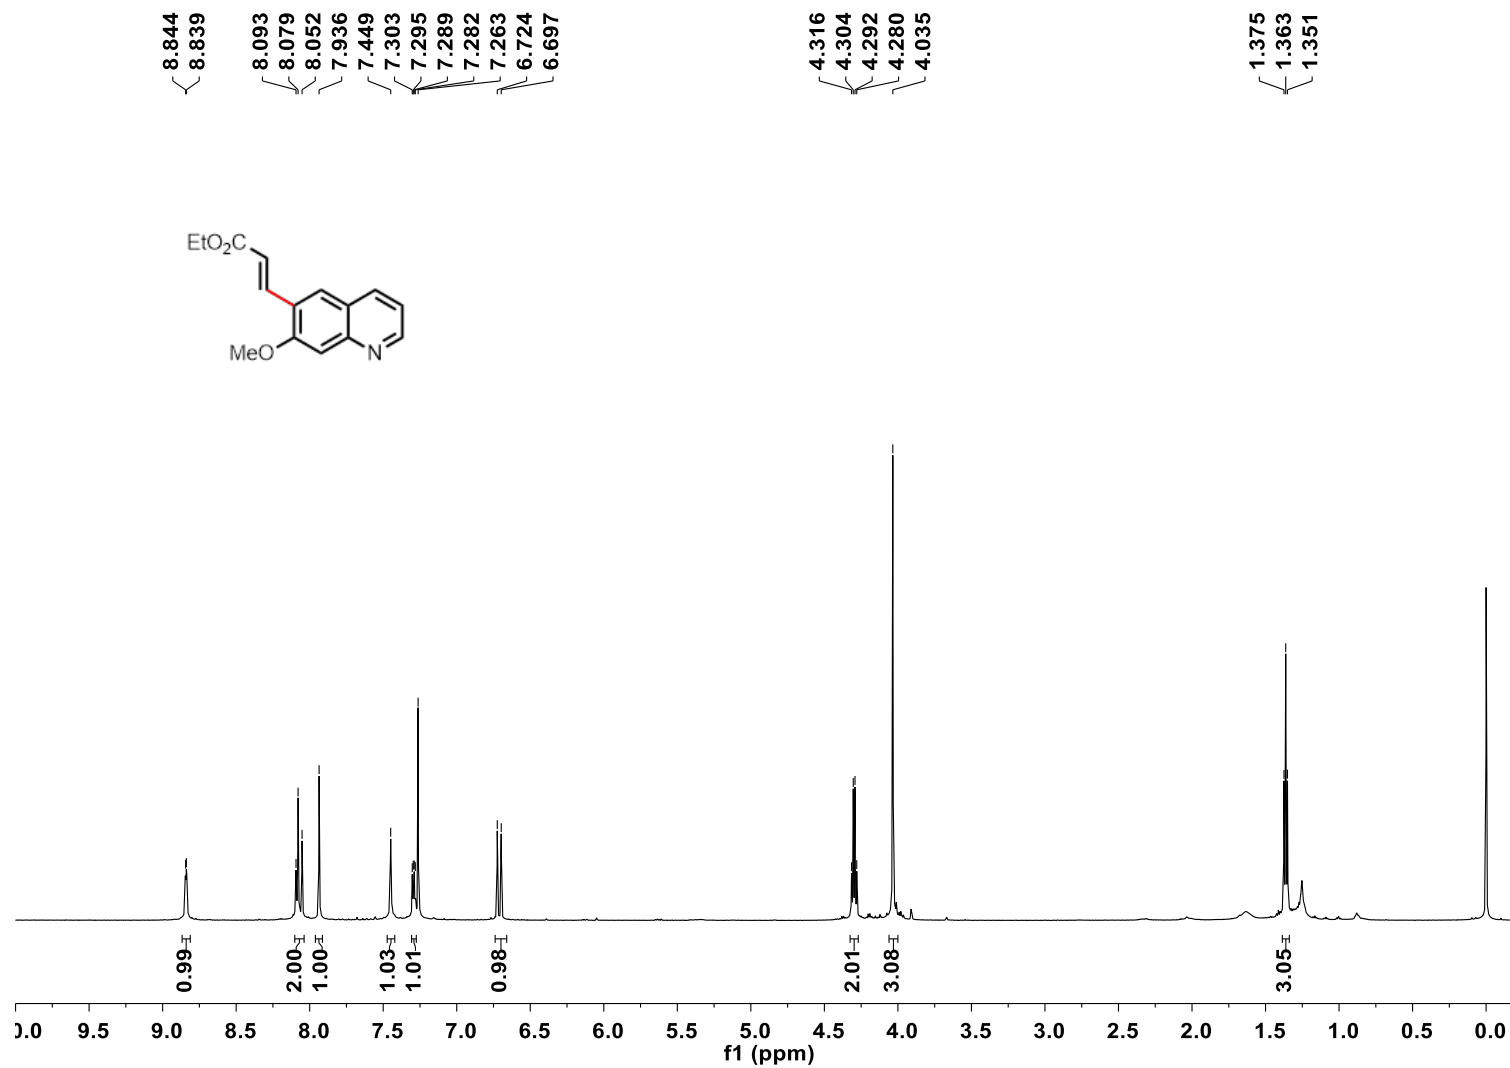

$^{13}\text{C}$  NMR (151 MHz,  $\text{CDCl}_3$ ) spectrum of **2o**

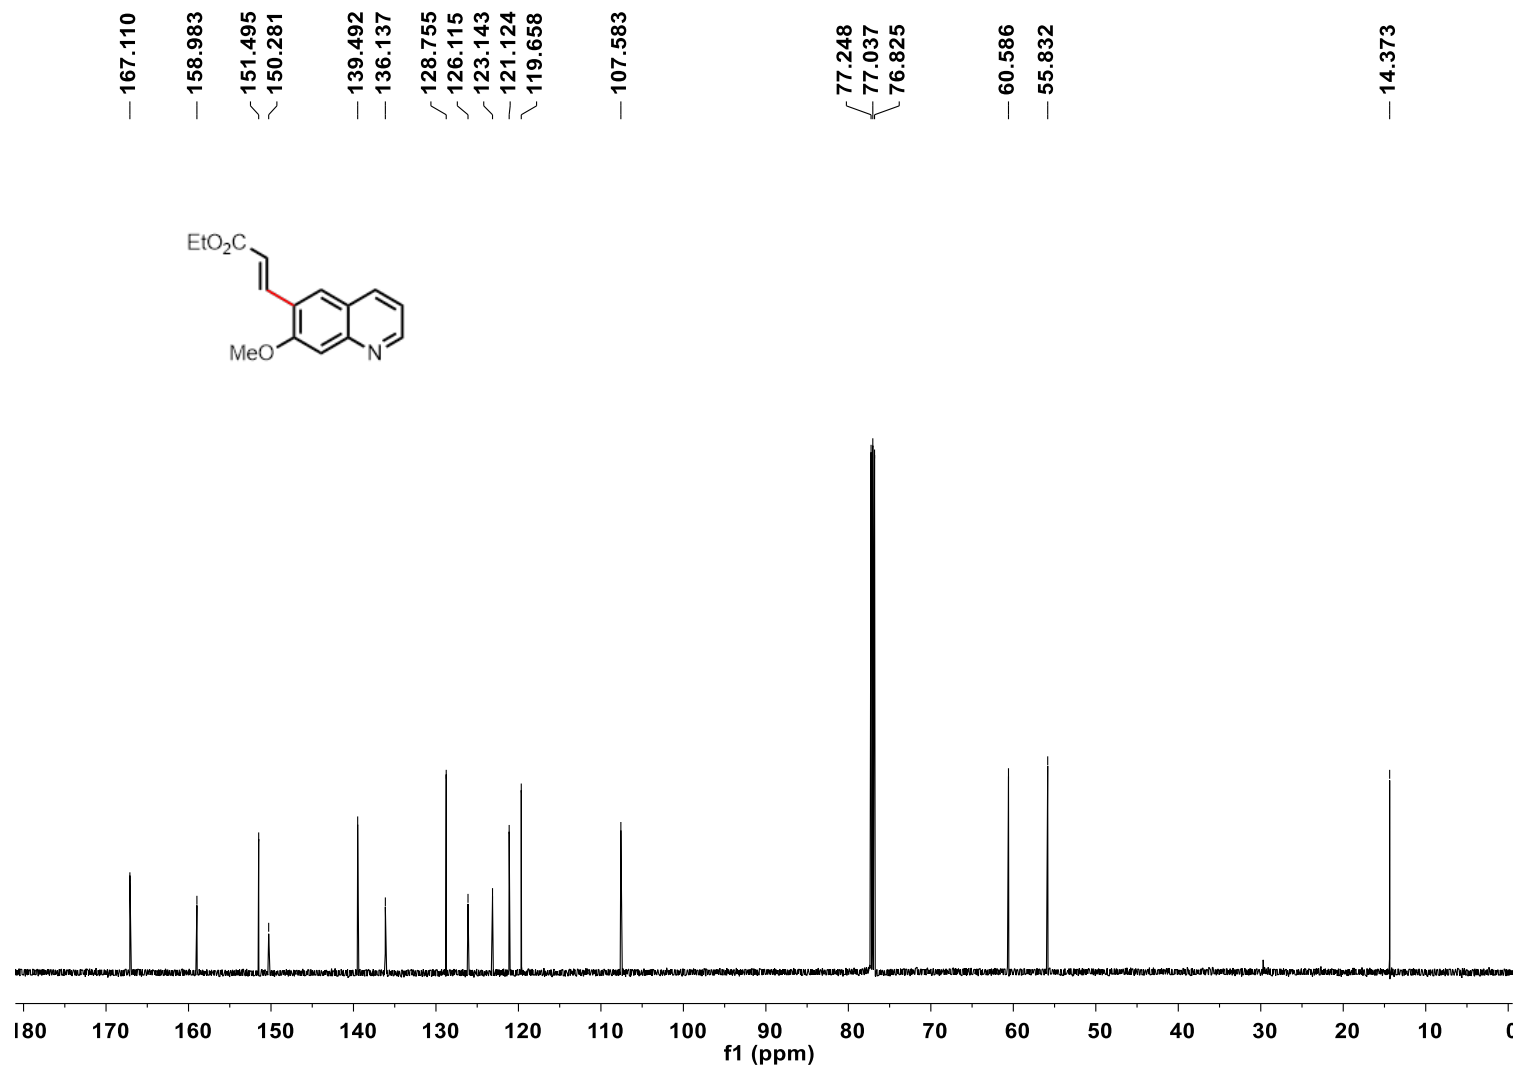

$^1\text{H}$  NMR (600 MHz,  $\text{CDCl}_3$ ) spectrum of **2p**

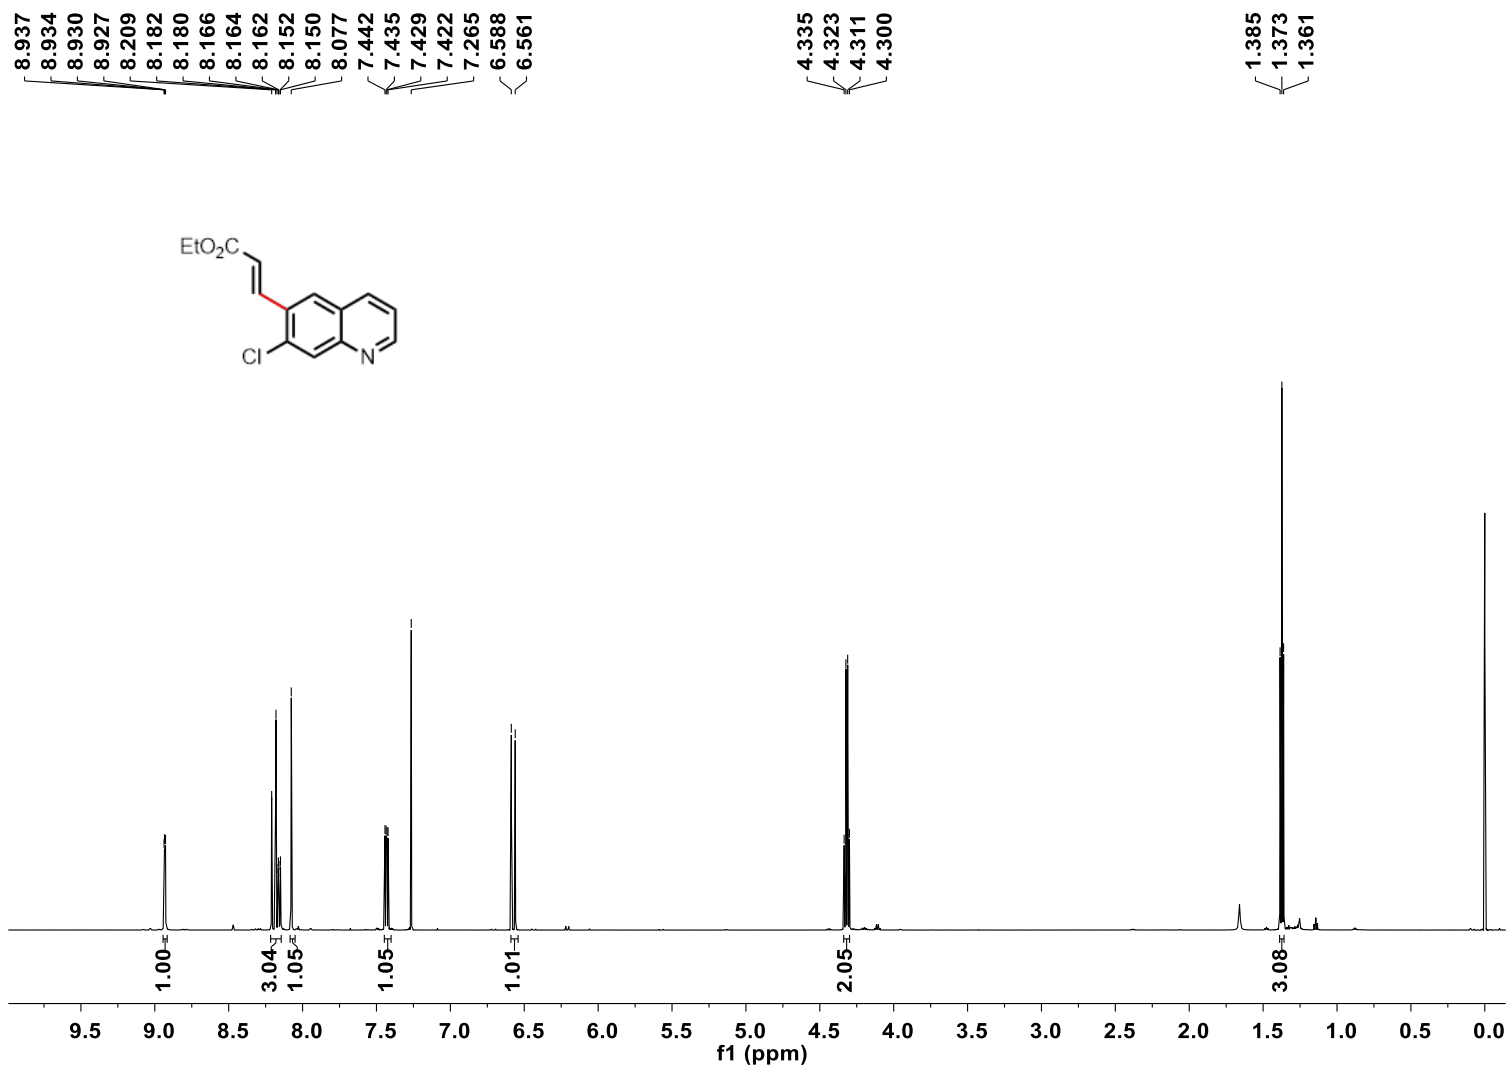

$^{13}\text{C}$  NMR (151 MHz,  $\text{CDCl}_3$ ) spectrum of **2p**

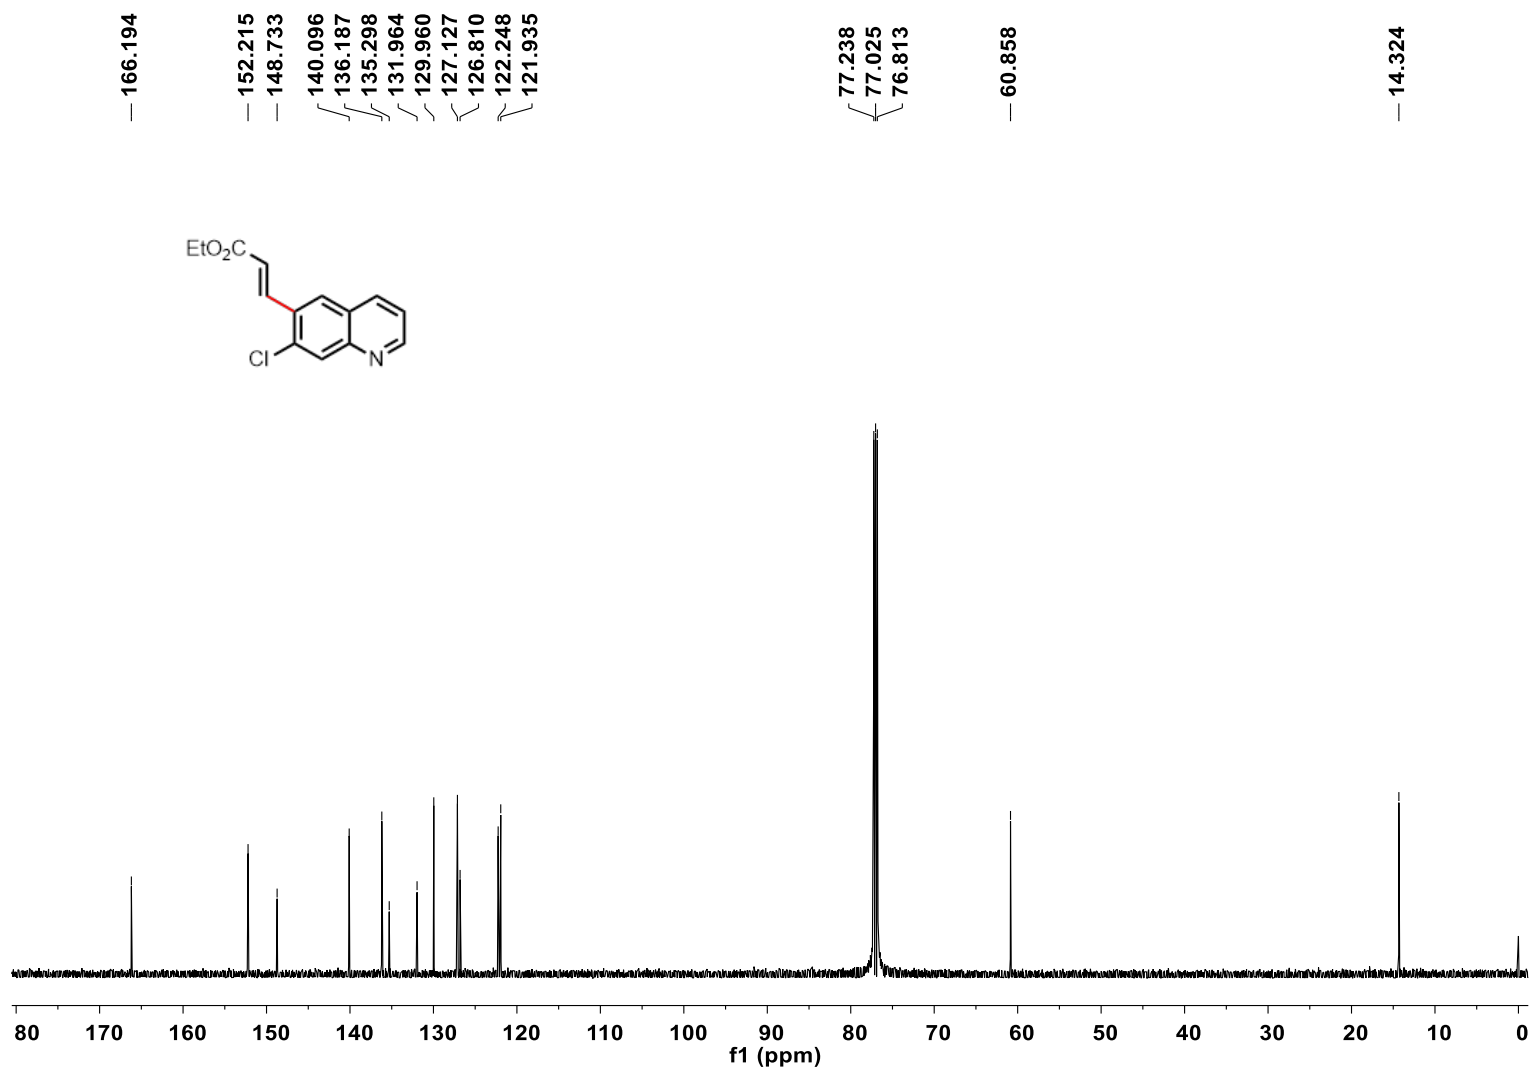

$^1\text{H}$  NMR (600 MHz,  $\text{CDCl}_3$ ) spectrum of **2q**

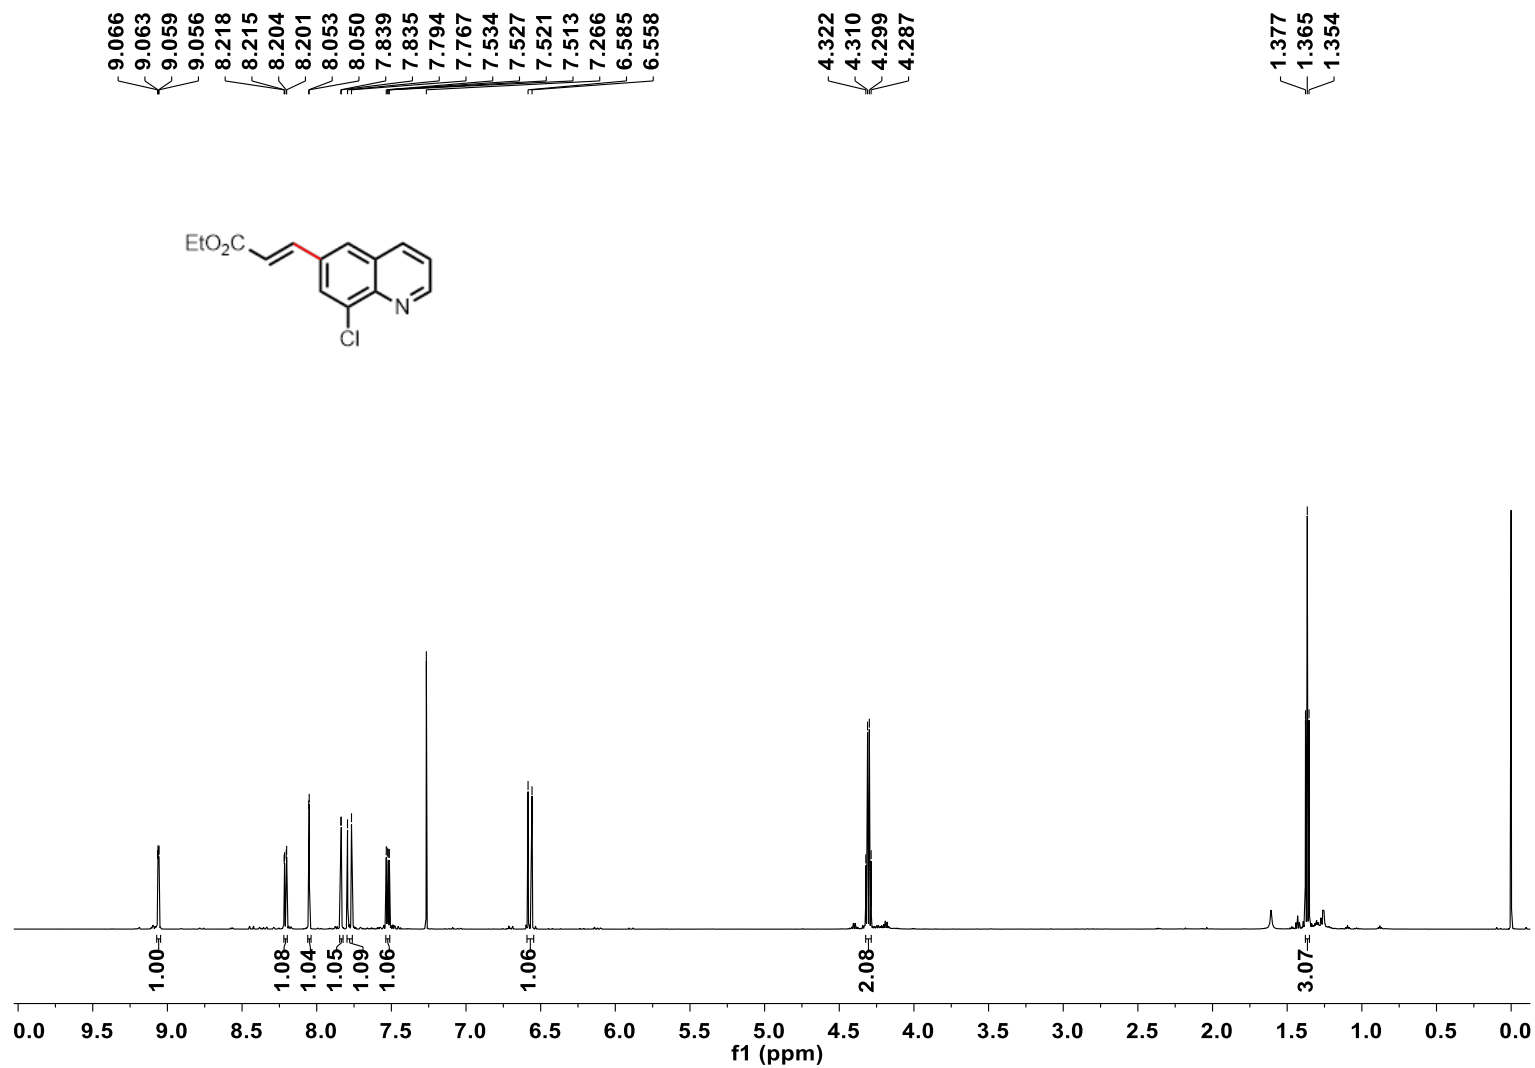

<sup>13</sup>C NMR (151 MHz, CDCl<sub>3</sub>) spectrum of **2q**

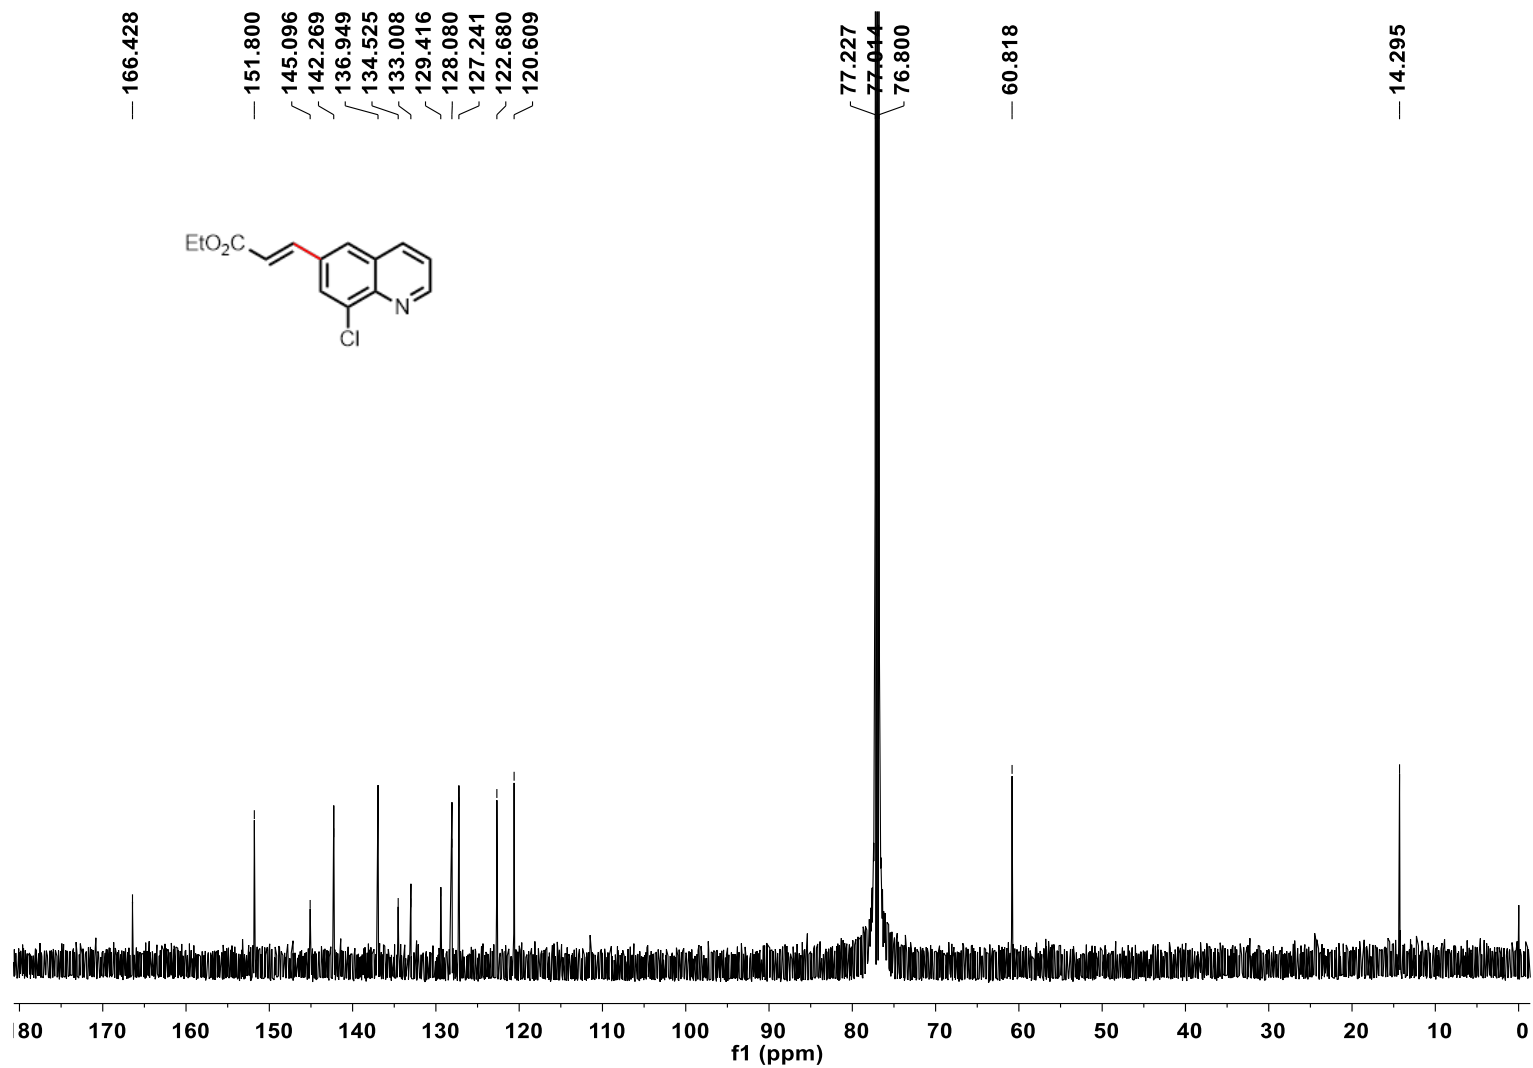



<sup>1</sup>H NMR (600 MHz, CDCl<sub>3</sub>) spectrum of **2r**

8.946  
8.943  
8.939  
8.936  
8.149  
8.146  
8.135  
8.133  
7.825  
7.798  
7.511  
7.508  
7.475  
7.468  
7.461  
7.454  
7.271  
7.200  
7.197  
6.564  
6.538

4.326  
4.314  
4.302  
4.290  
4.135

1.382  
1.370  
1.359

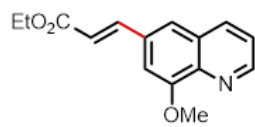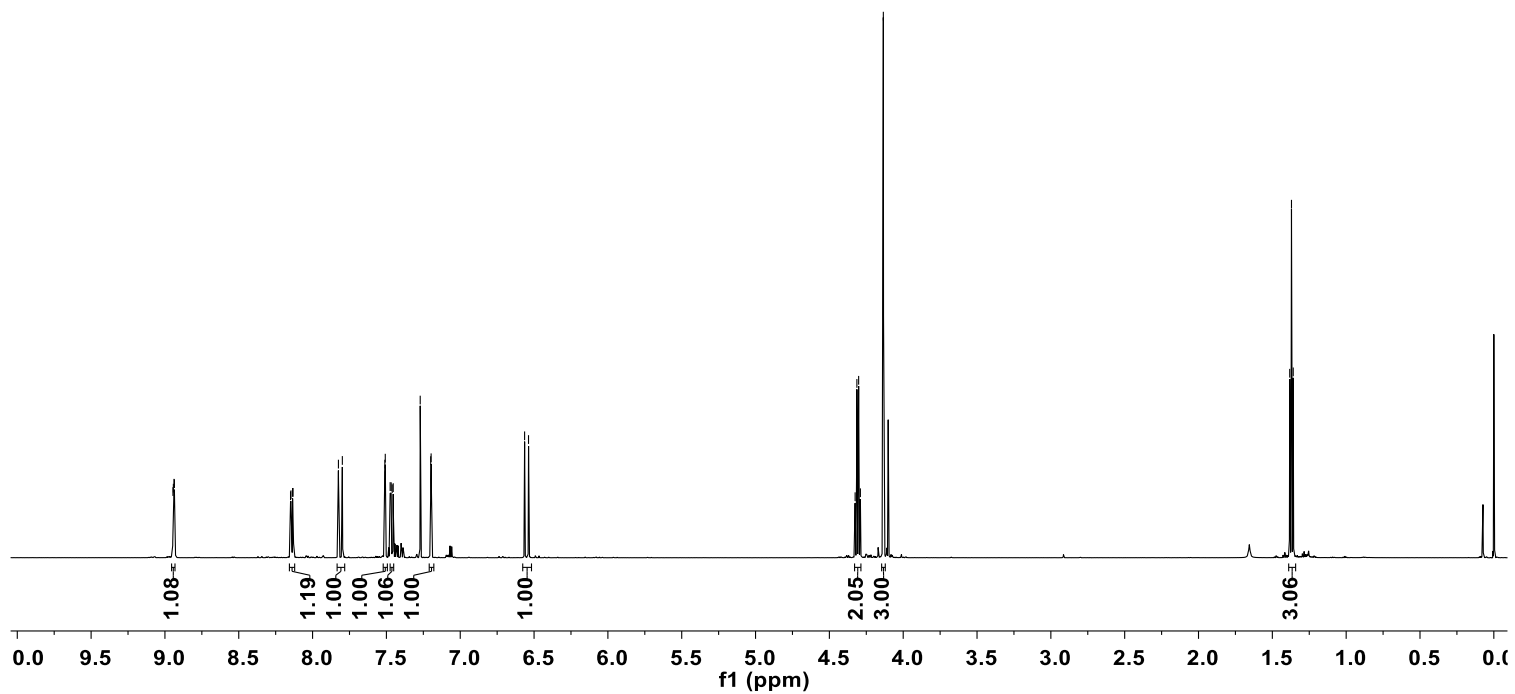

<sup>13</sup>C NMR (151 MHz, CDCl<sub>3</sub>) spectrum of **2r**

— 166.763  
— 155.791  
— 150.236  
— 144.132  
— 141.318  
— 136.400  
— 132.954  
— 129.195  
— 122.461  
— 121.917  
— 119.330  
— 104.606  
— 77.255  
— 77.043  
— 76.830  
— 60.698  
— 56.093  
— 14.350

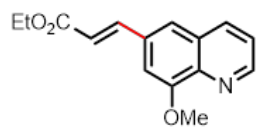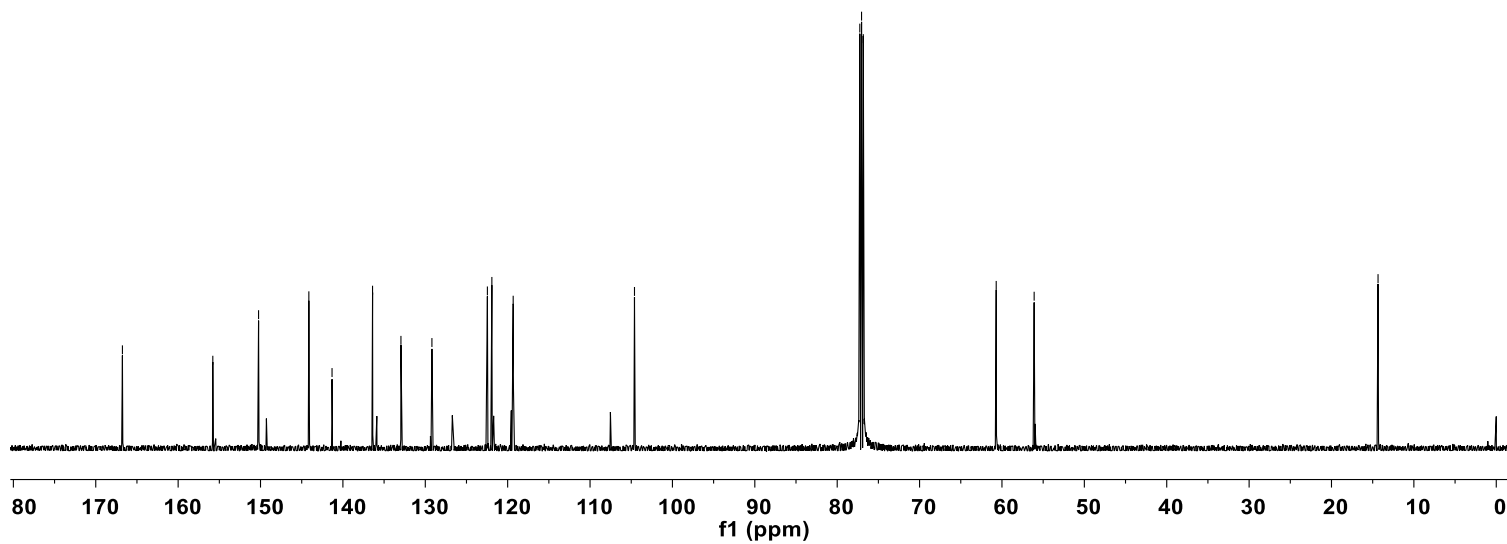

<sup>1</sup>H NMR (600 MHz, CDCl<sub>3</sub>) spectrum of 2s

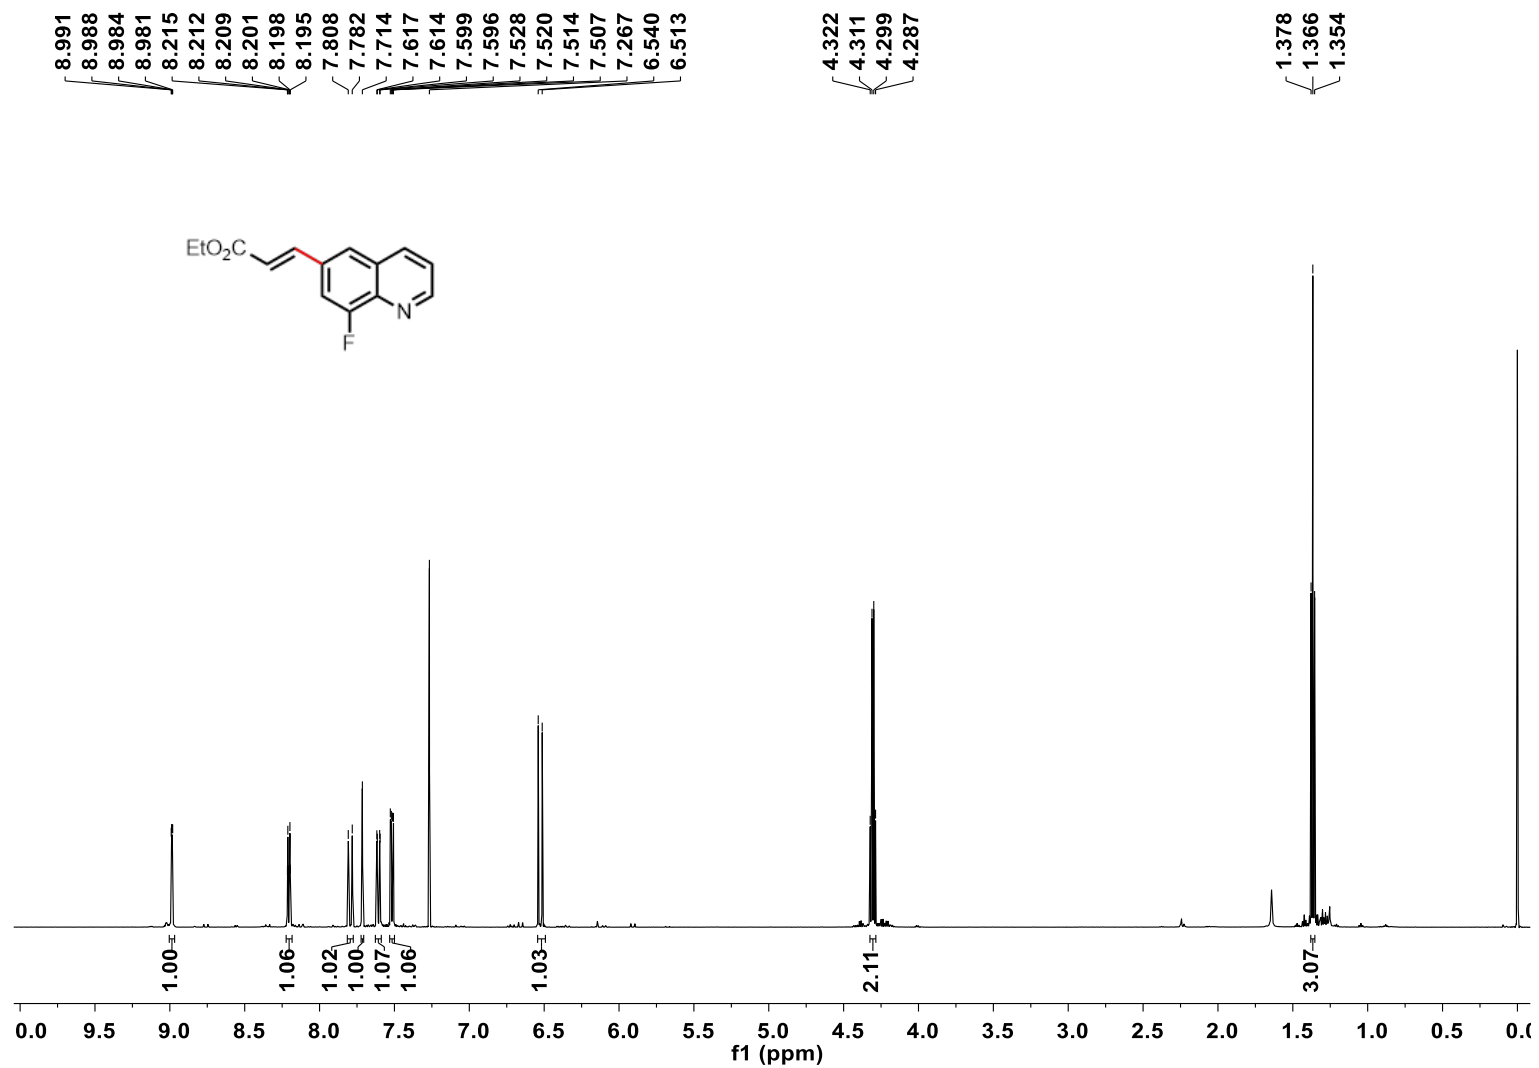

$^{13}\text{C}$  NMR (151 MHz,  $\text{CDCl}_3$ ) spectrum of **2s**

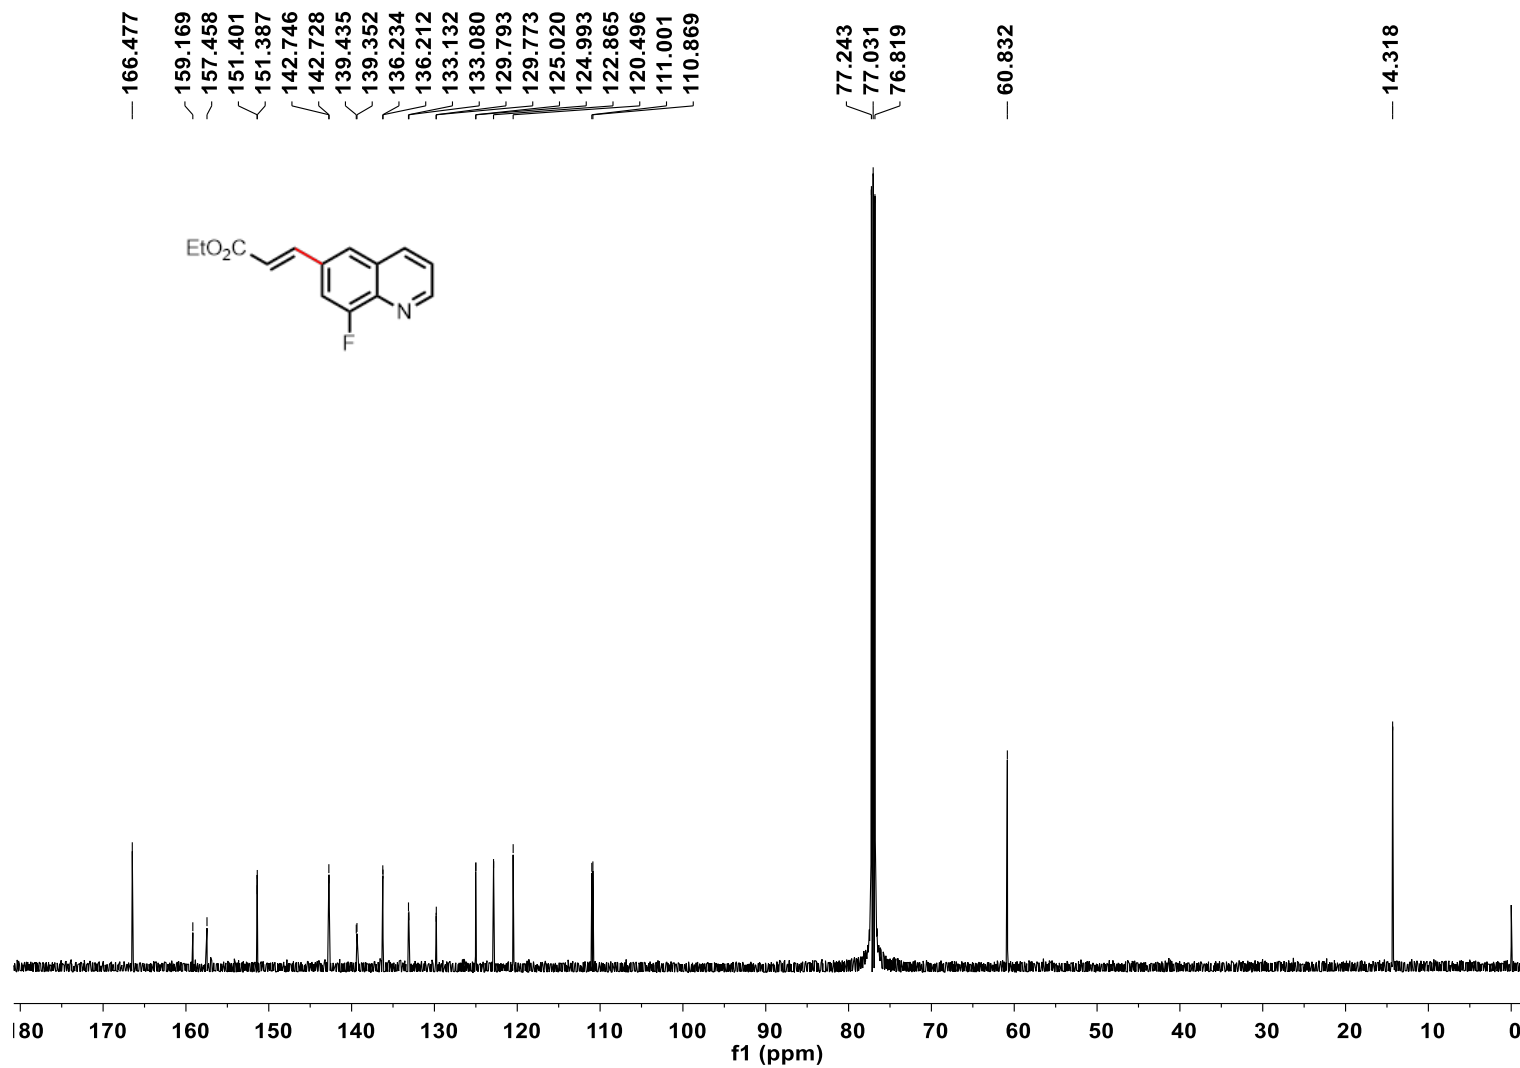

$^{19}\text{F}$  NMR (376 MHz,  $\text{CDCl}_3$ ) spectrum of **2s**

-126.919

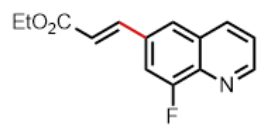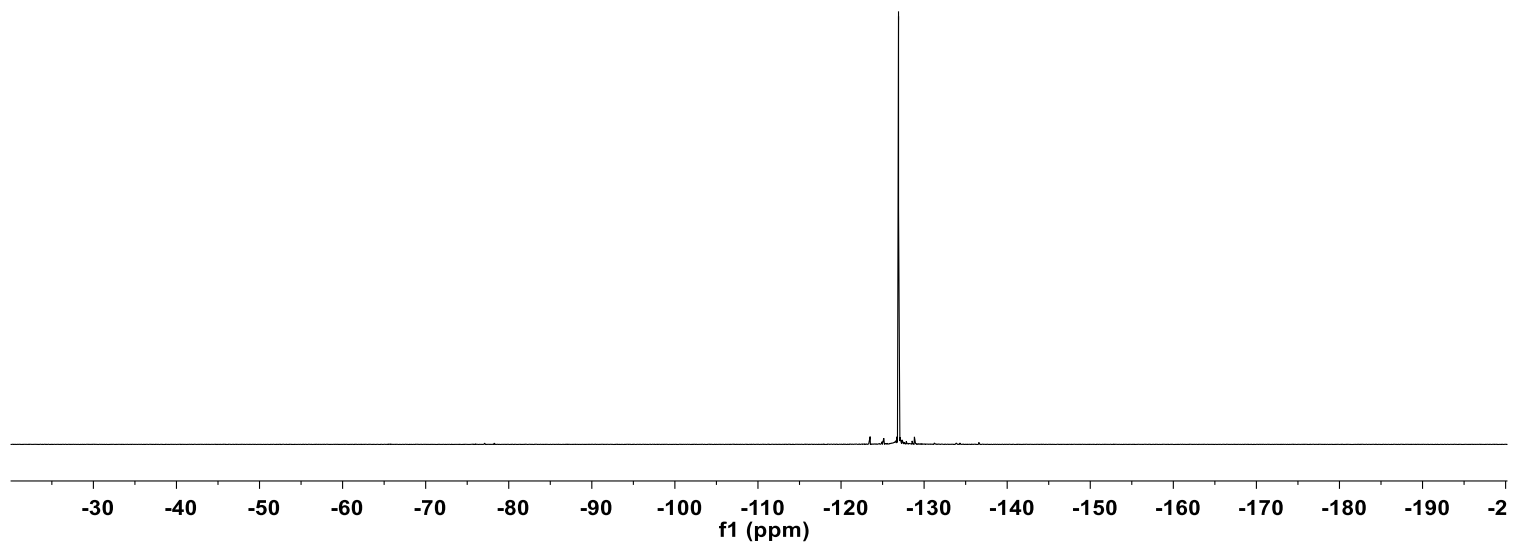

<sup>1</sup>H NMR (600 MHz, CDCl<sub>3</sub>) spectrum of **2t**

8.199  
8.173  
8.081  
8.035  
8.026  
8.021  
7.313  
7.299  
7.263

6.563  
6.537

4.328  
4.316  
4.304  
4.292

— 2.744

1.380  
1.368  
1.356

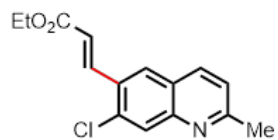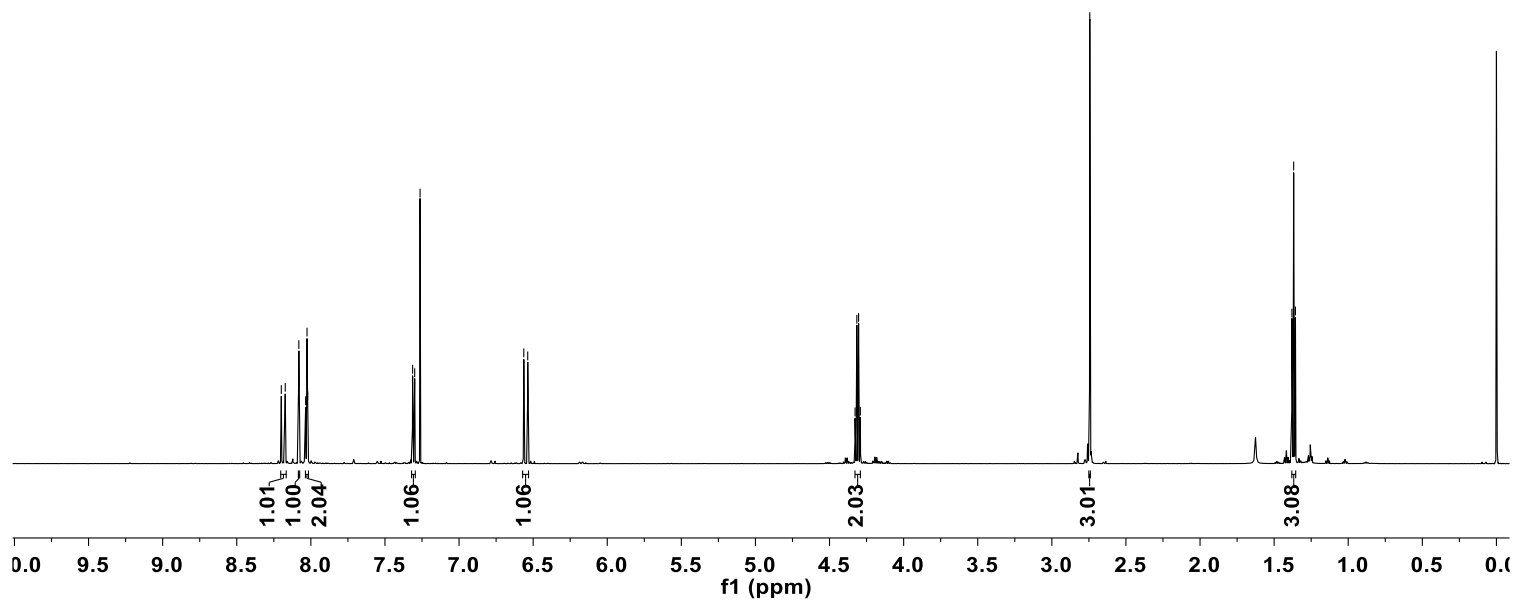

<sup>13</sup>C NMR (151 MHz, CDCl<sub>3</sub>) spectrum of **2t**

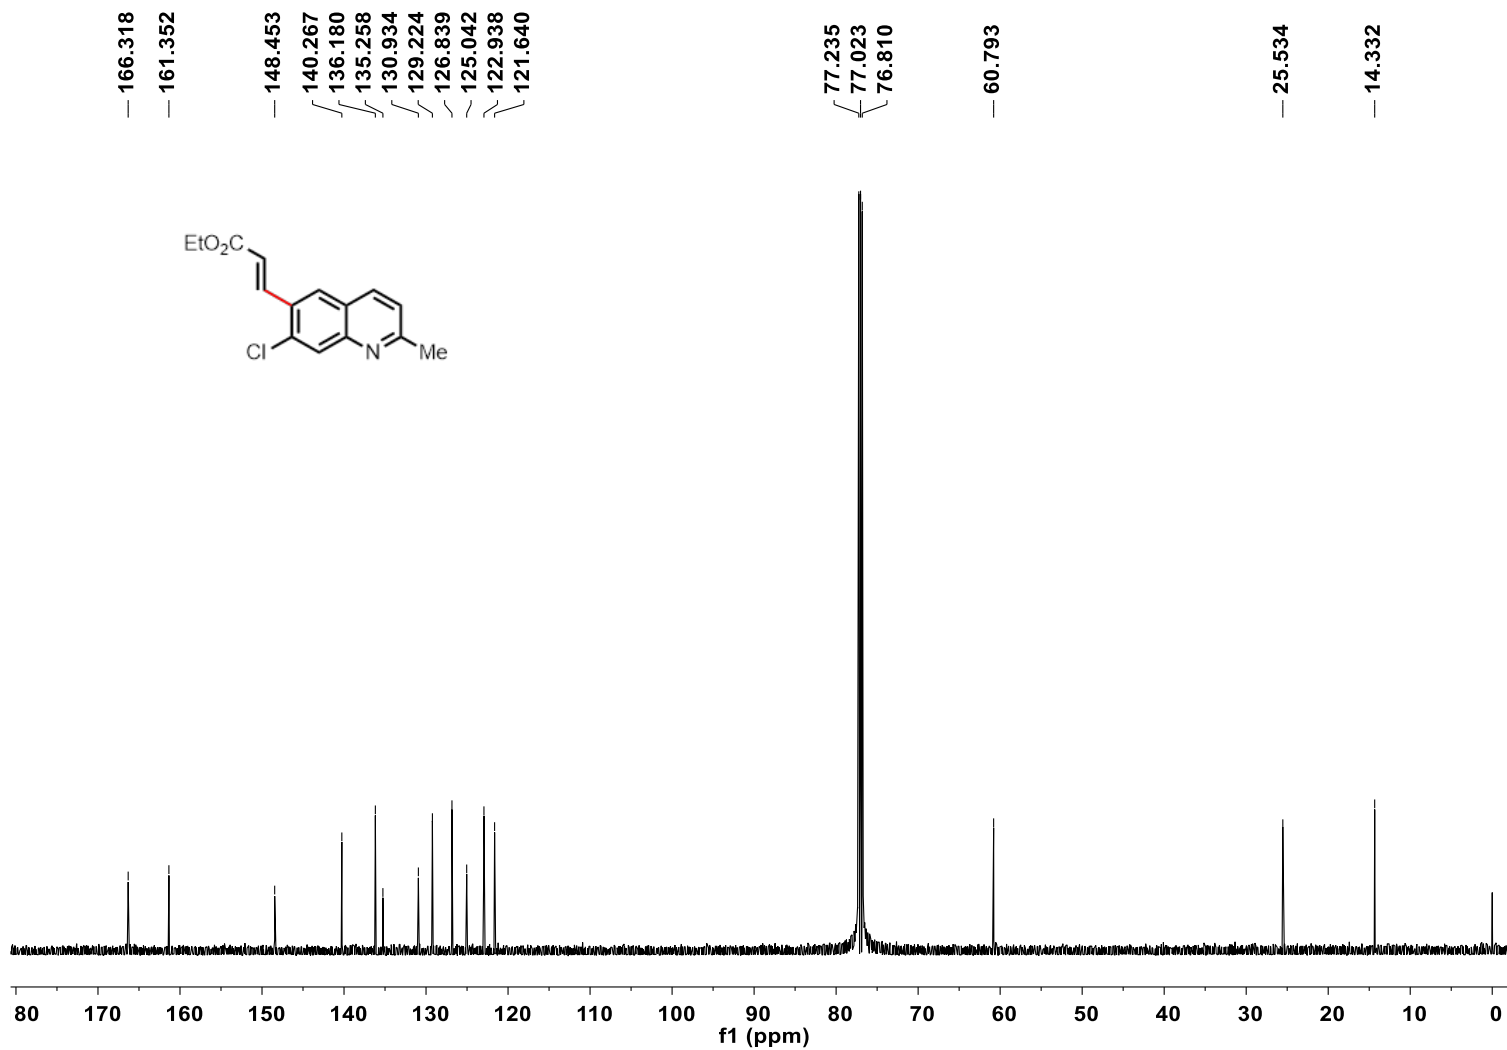

<sup>1</sup>H NMR (600 MHz, CDCl<sub>3</sub>) spectrum of **2u**

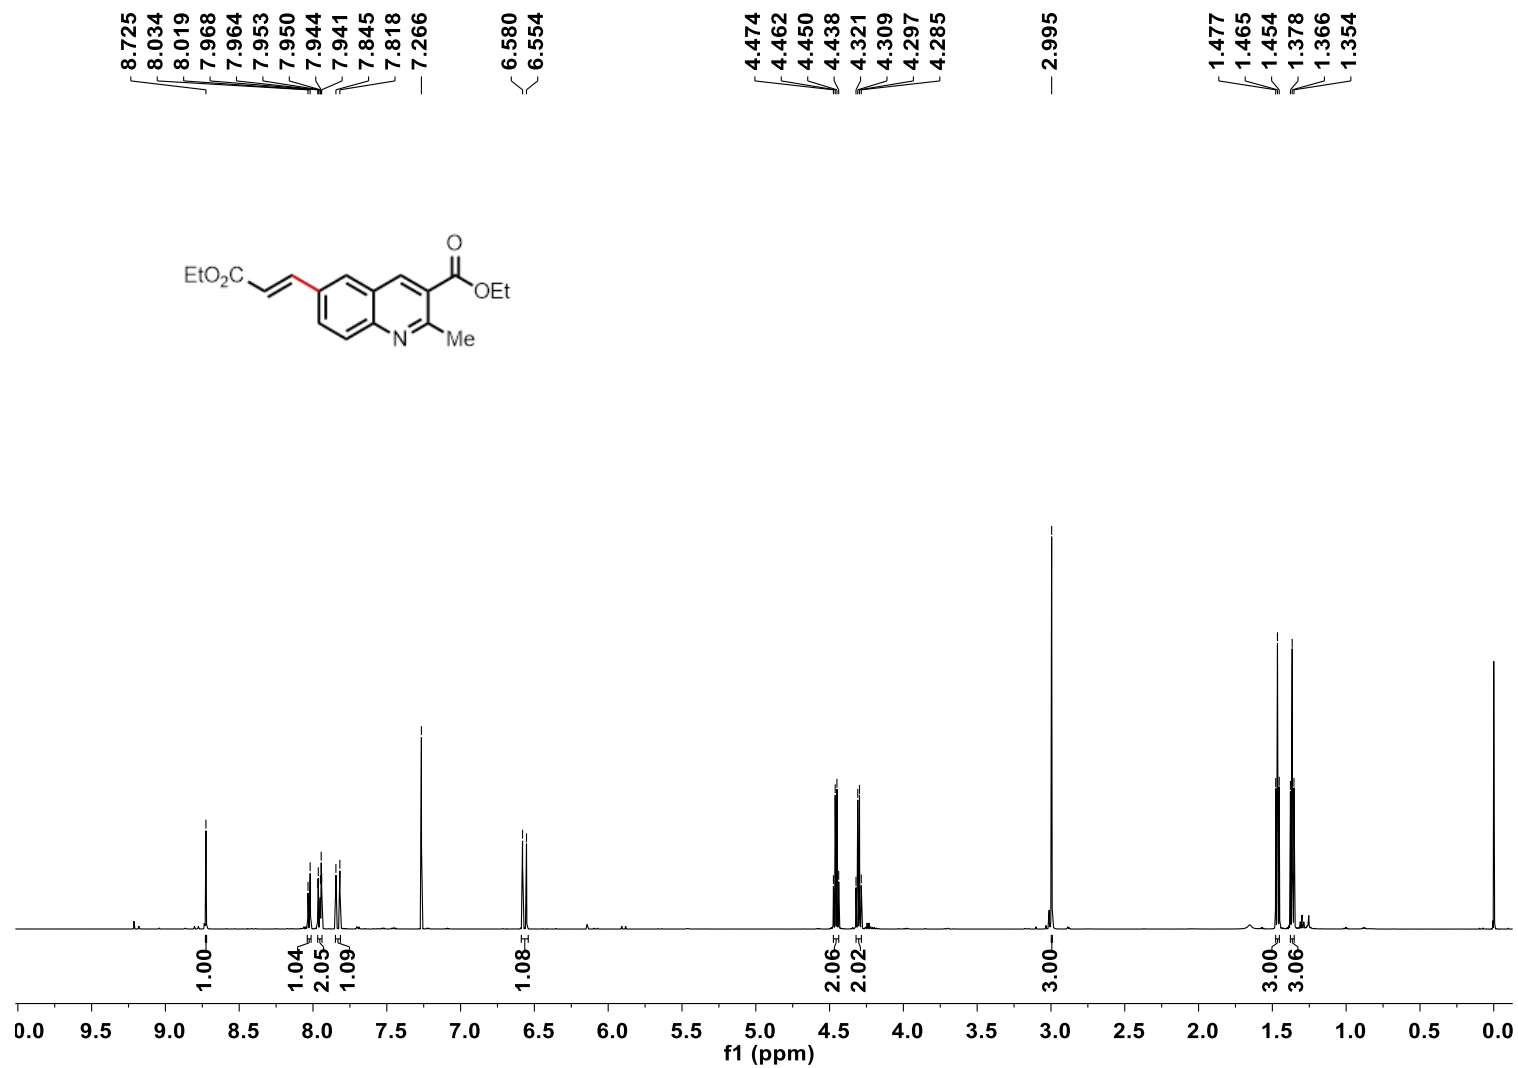



$^{13}\text{C}$  NMR (151 MHz,  $\text{CDCl}_3$ ) spectrum of **2u**

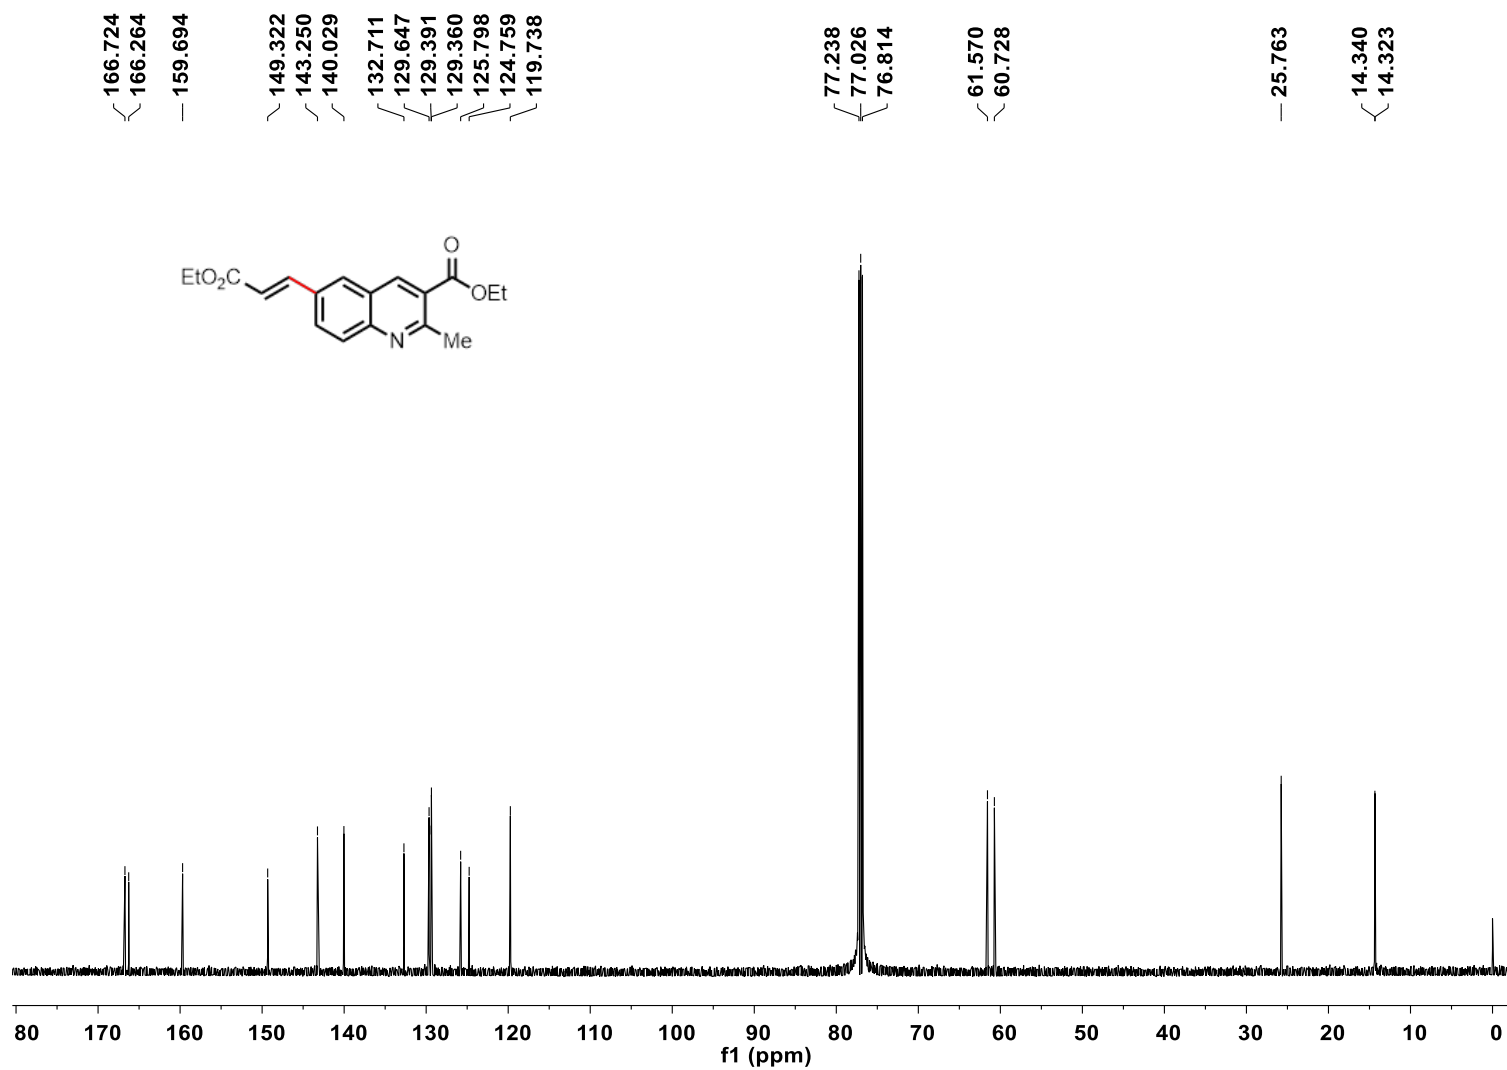

$^1\text{H}$  NMR (600 MHz,  $\text{CDCl}_3$ ) spectrum of **2v**

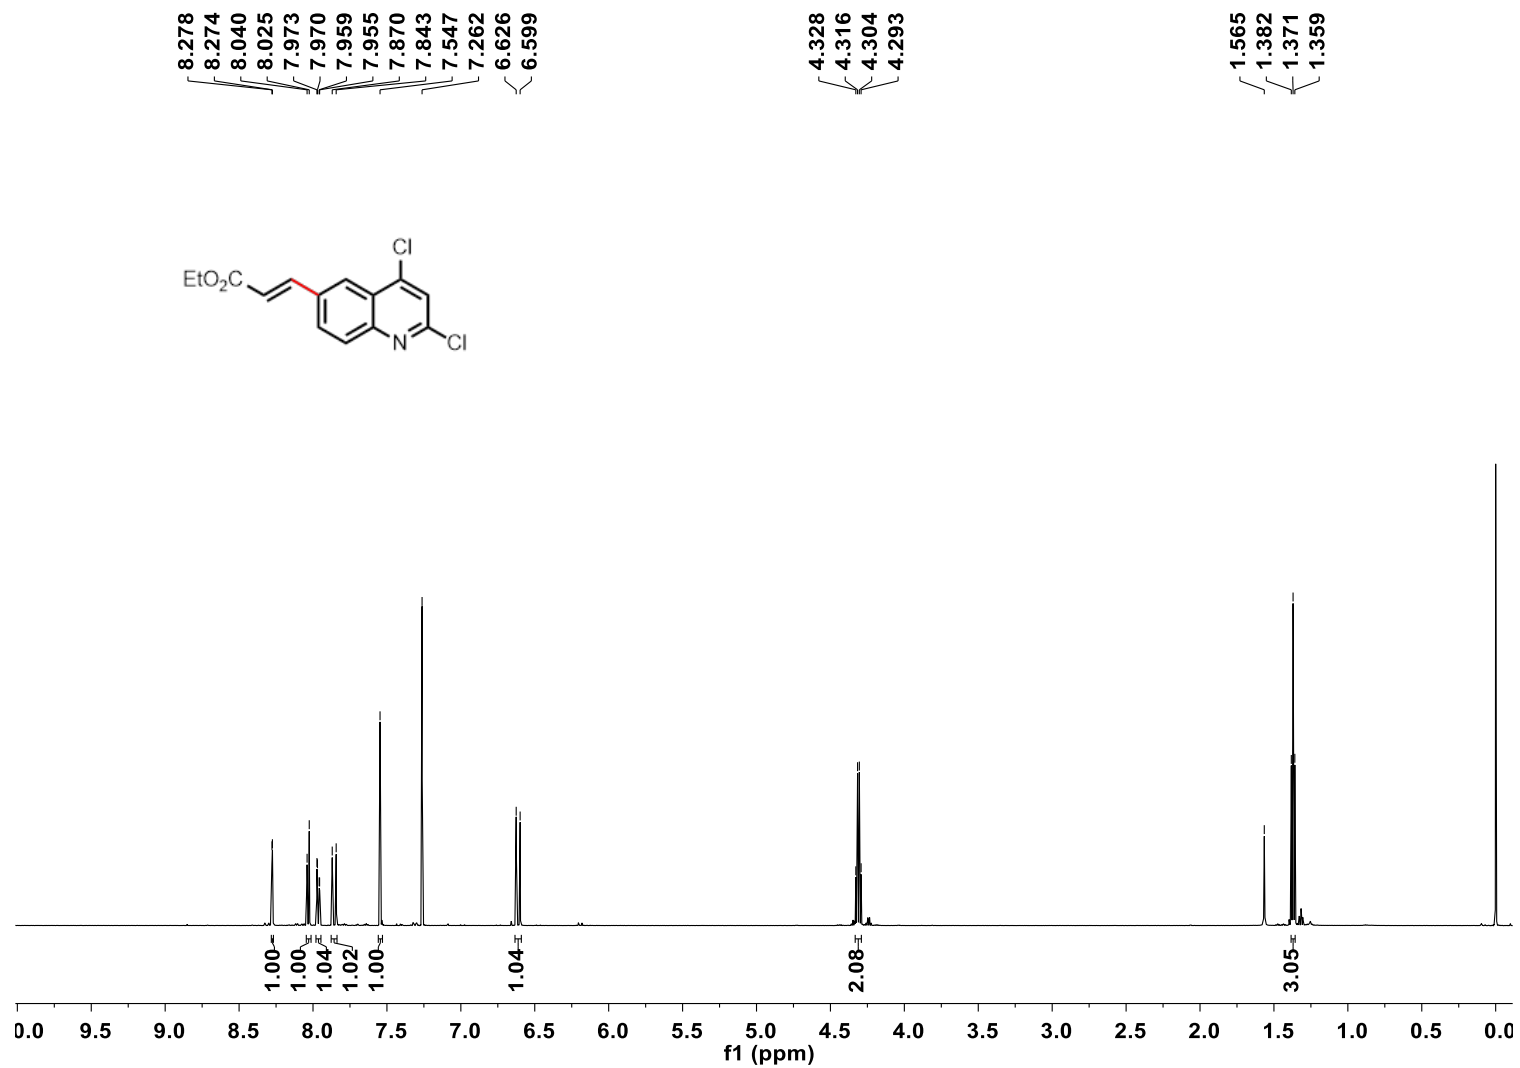

$^{13}\text{C}$  NMR (151 MHz,  $\text{CDCl}_3$ ) spectrum of **2v**

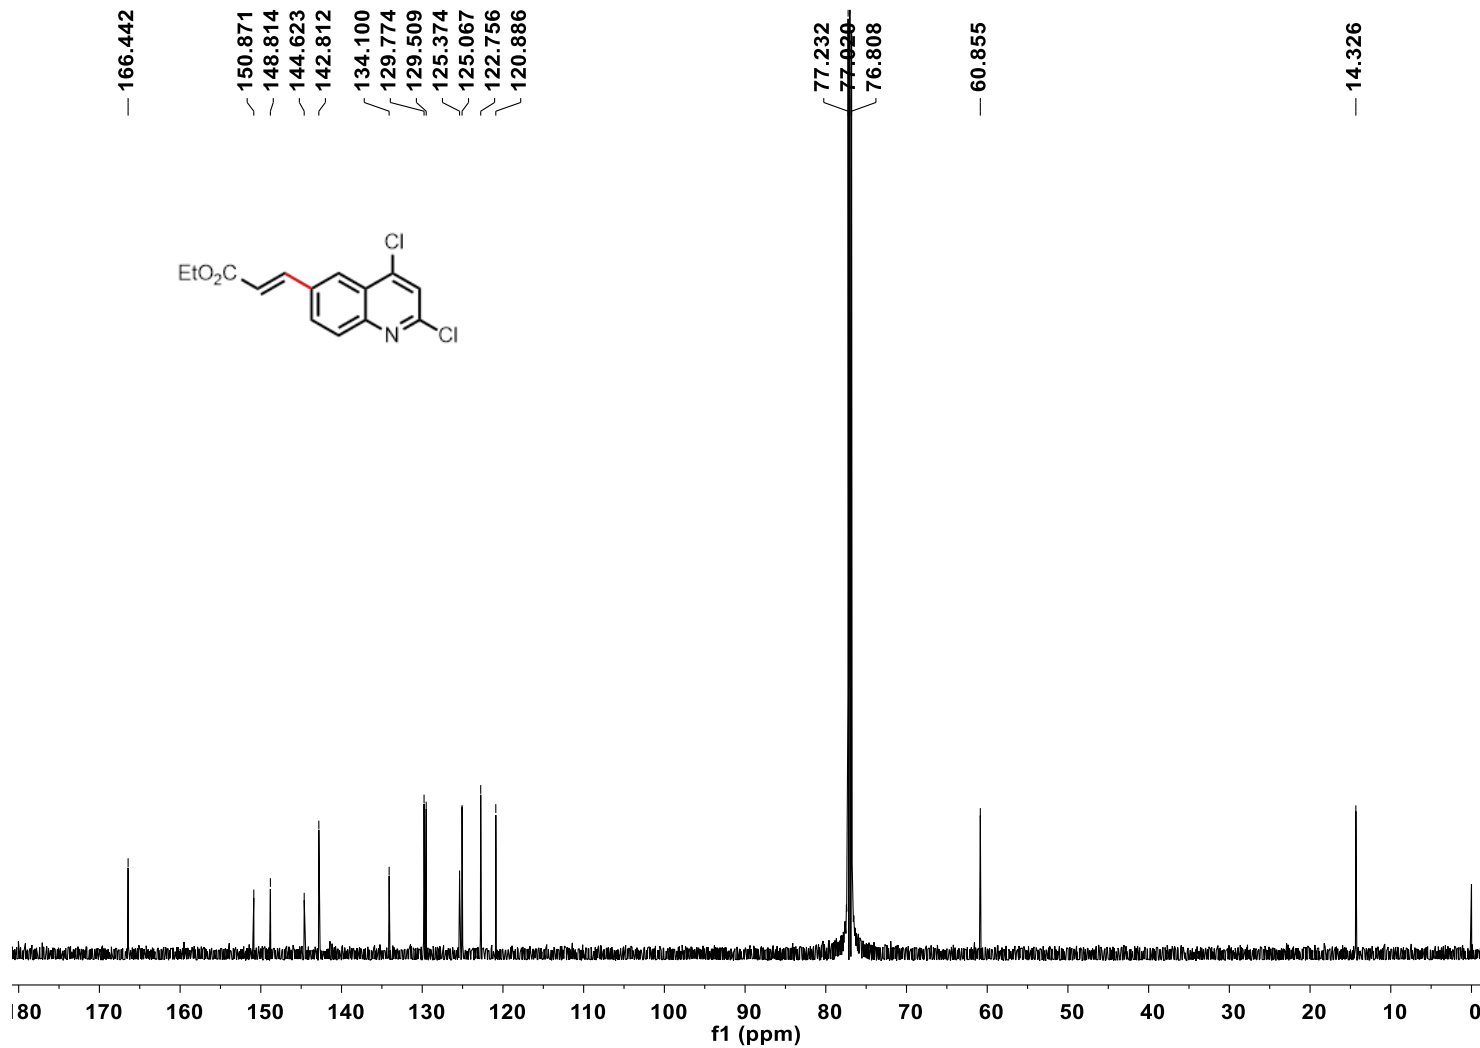

<sup>1</sup>H NMR (600 MHz, CDCl<sub>3</sub>) spectrum of **2w**

8.788  
8.780  
8.461  
8.204  
8.190  
8.177

7.507  
7.499  
7.267

6.656  
6.630

4.348  
4.336  
4.324  
4.312

1.396  
1.384  
1.372

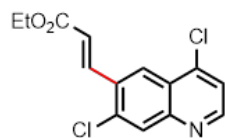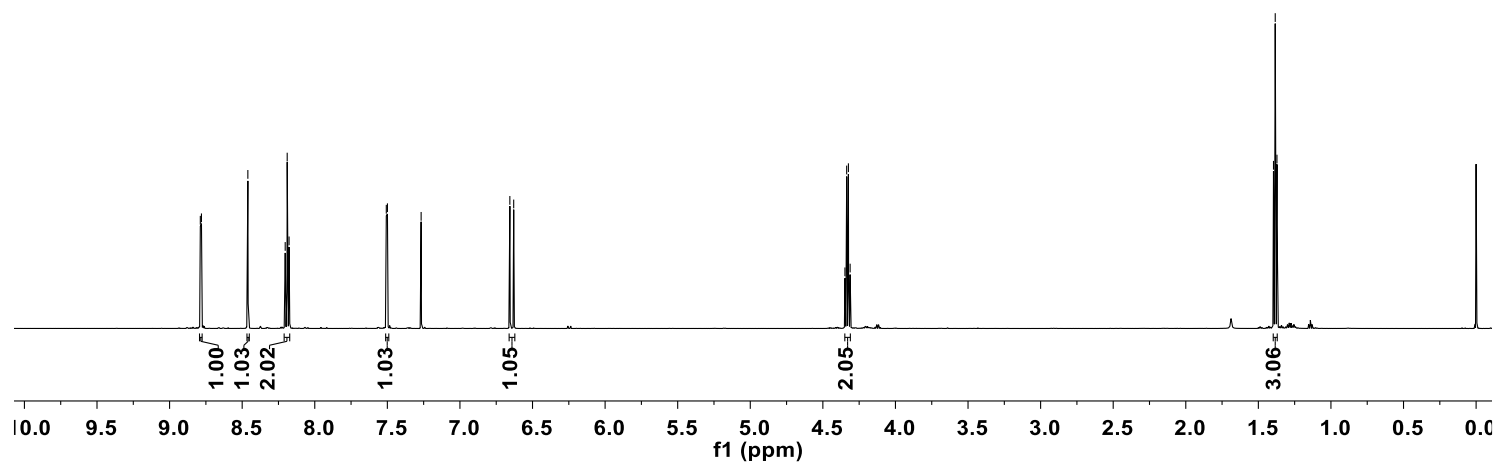

$^{13}\text{C}$  NMR (151 MHz,  $\text{CDCl}_3$ ) spectrum of **2w**

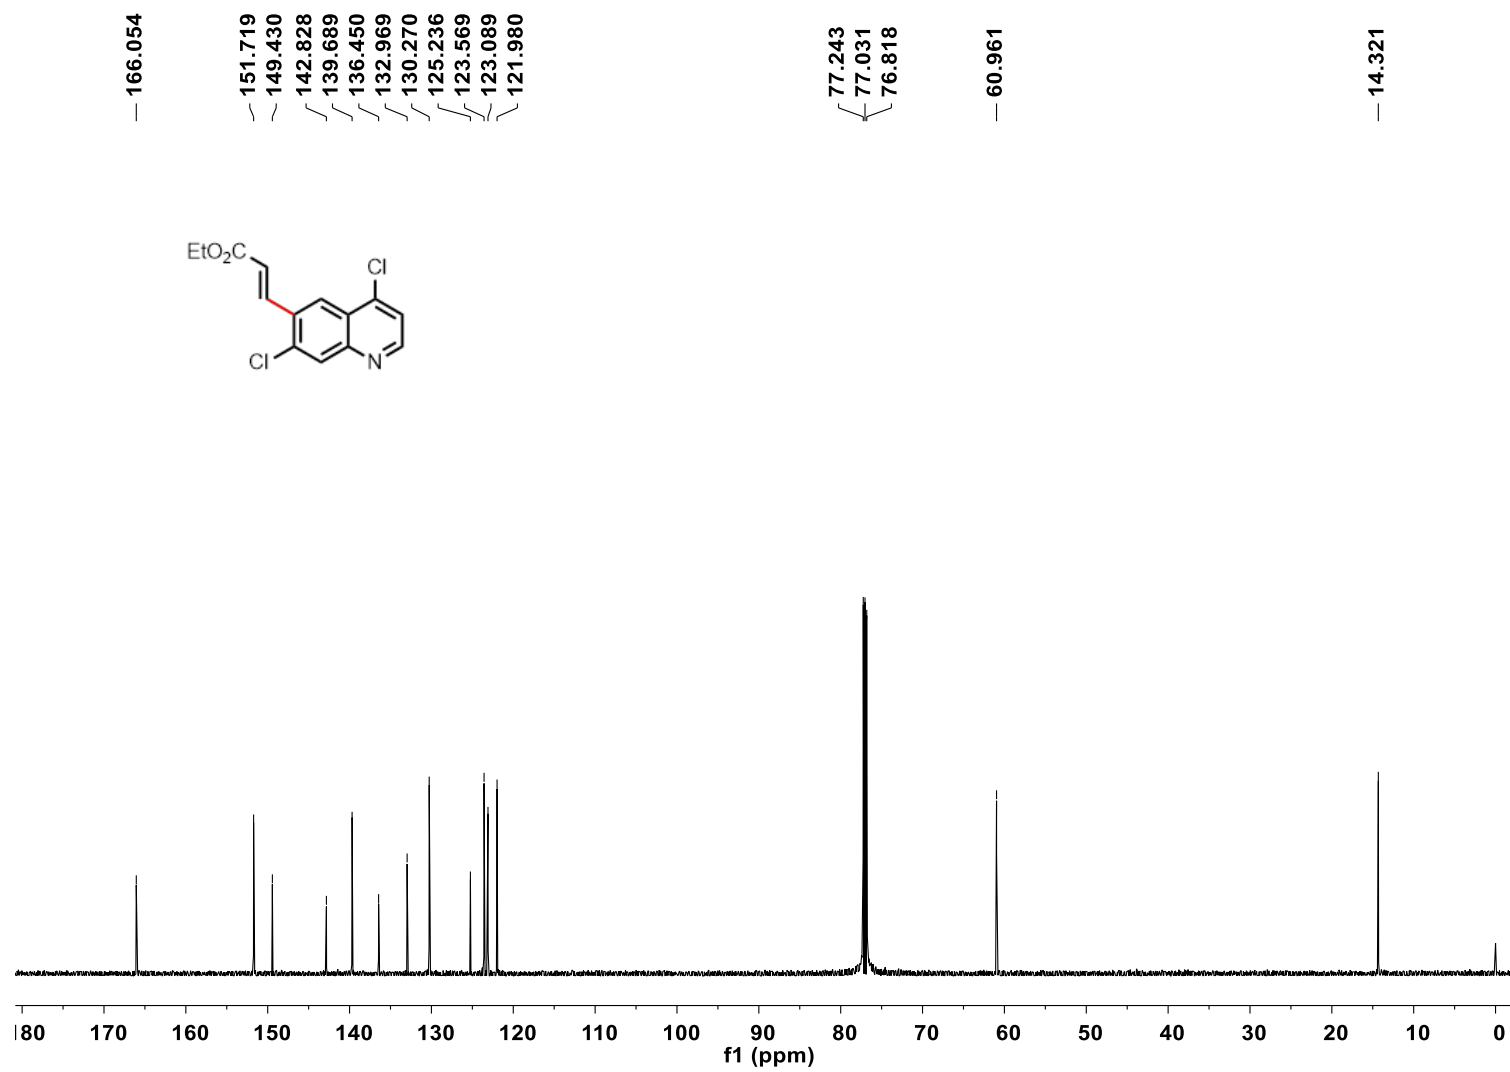

<sup>1</sup>H NMR (600 MHz, CDCl<sub>3</sub>) spectrum of **2x**

8.694  
8.686  
8.334  
8.090  
8.064  
7.447  
7.365  
7.357  
7.267  
6.772  
6.745

4.327  
4.315  
4.303  
4.291  
4.041

1.384  
1.372  
1.360

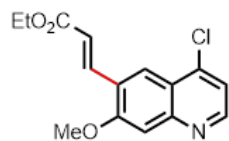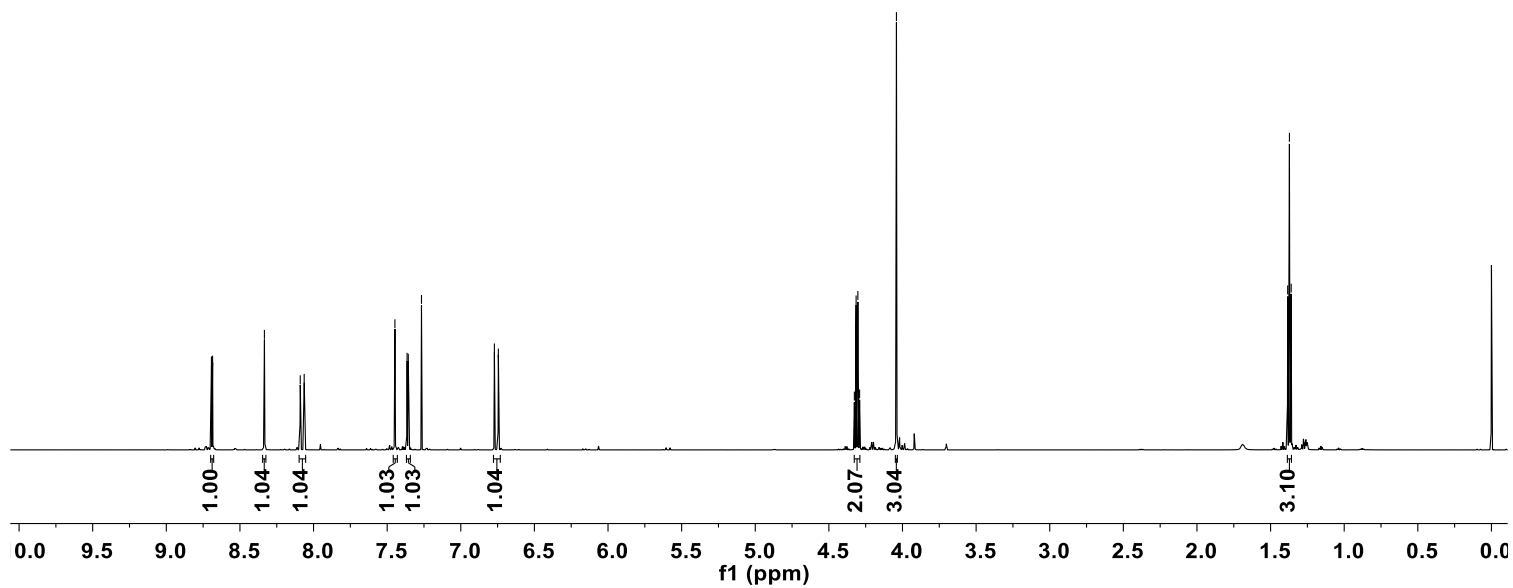

$^{13}\text{C}$  NMR (151 MHz,  $\text{CDCl}_3$ ) spectrum of **2x**

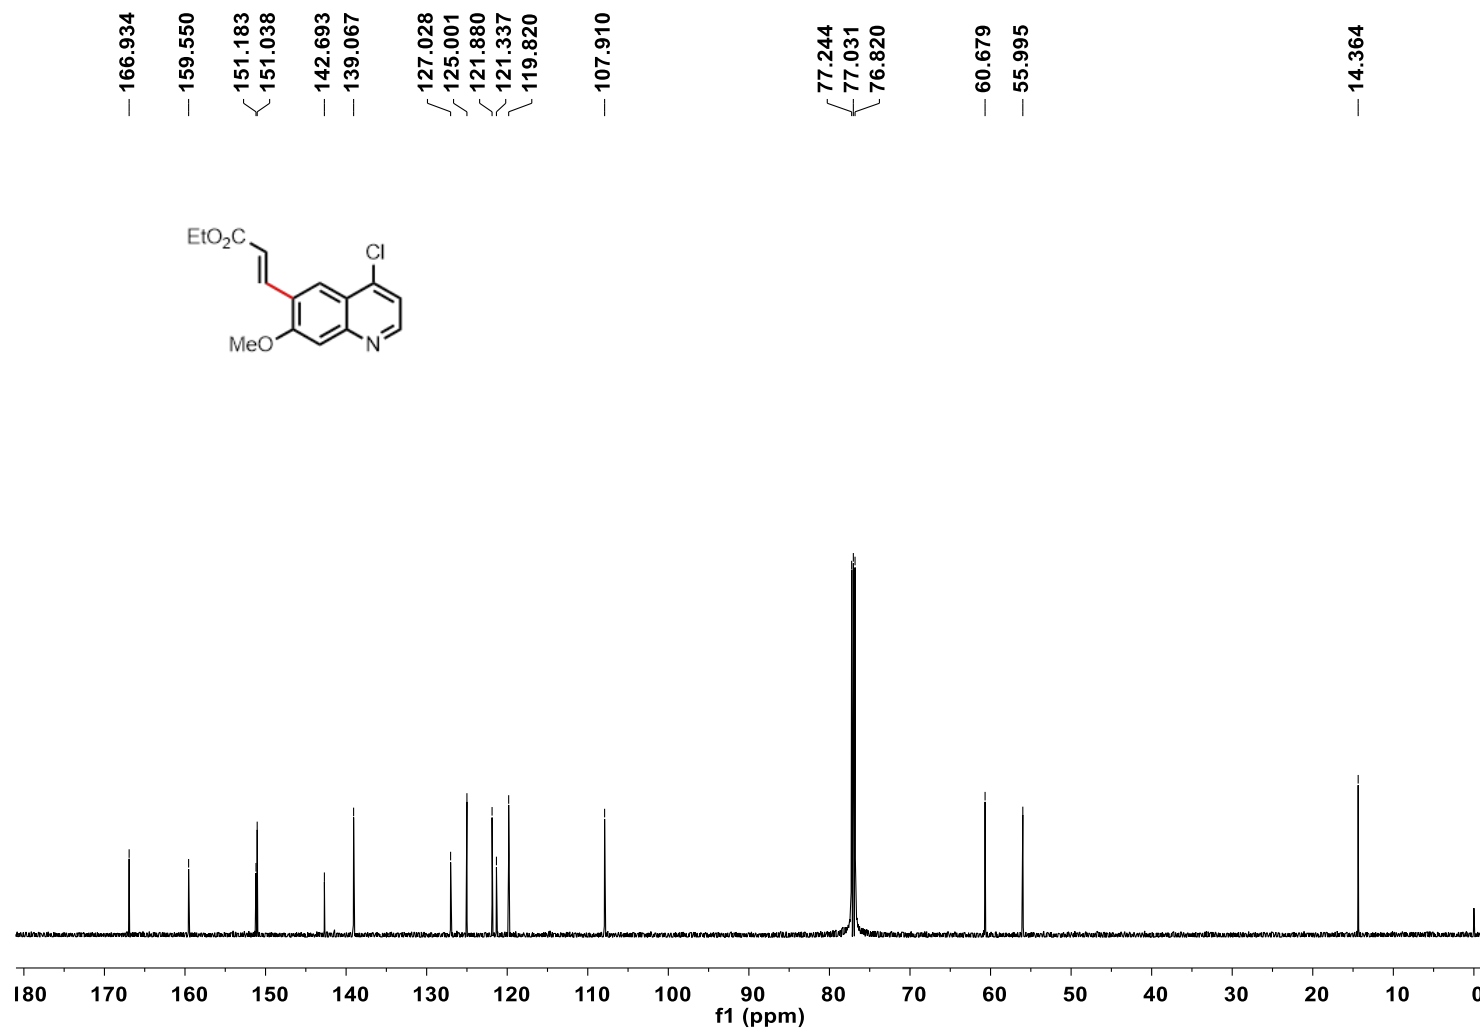

<sup>1</sup>H NMR (600 MHz, CDCl<sub>3</sub>) spectrum of 2y

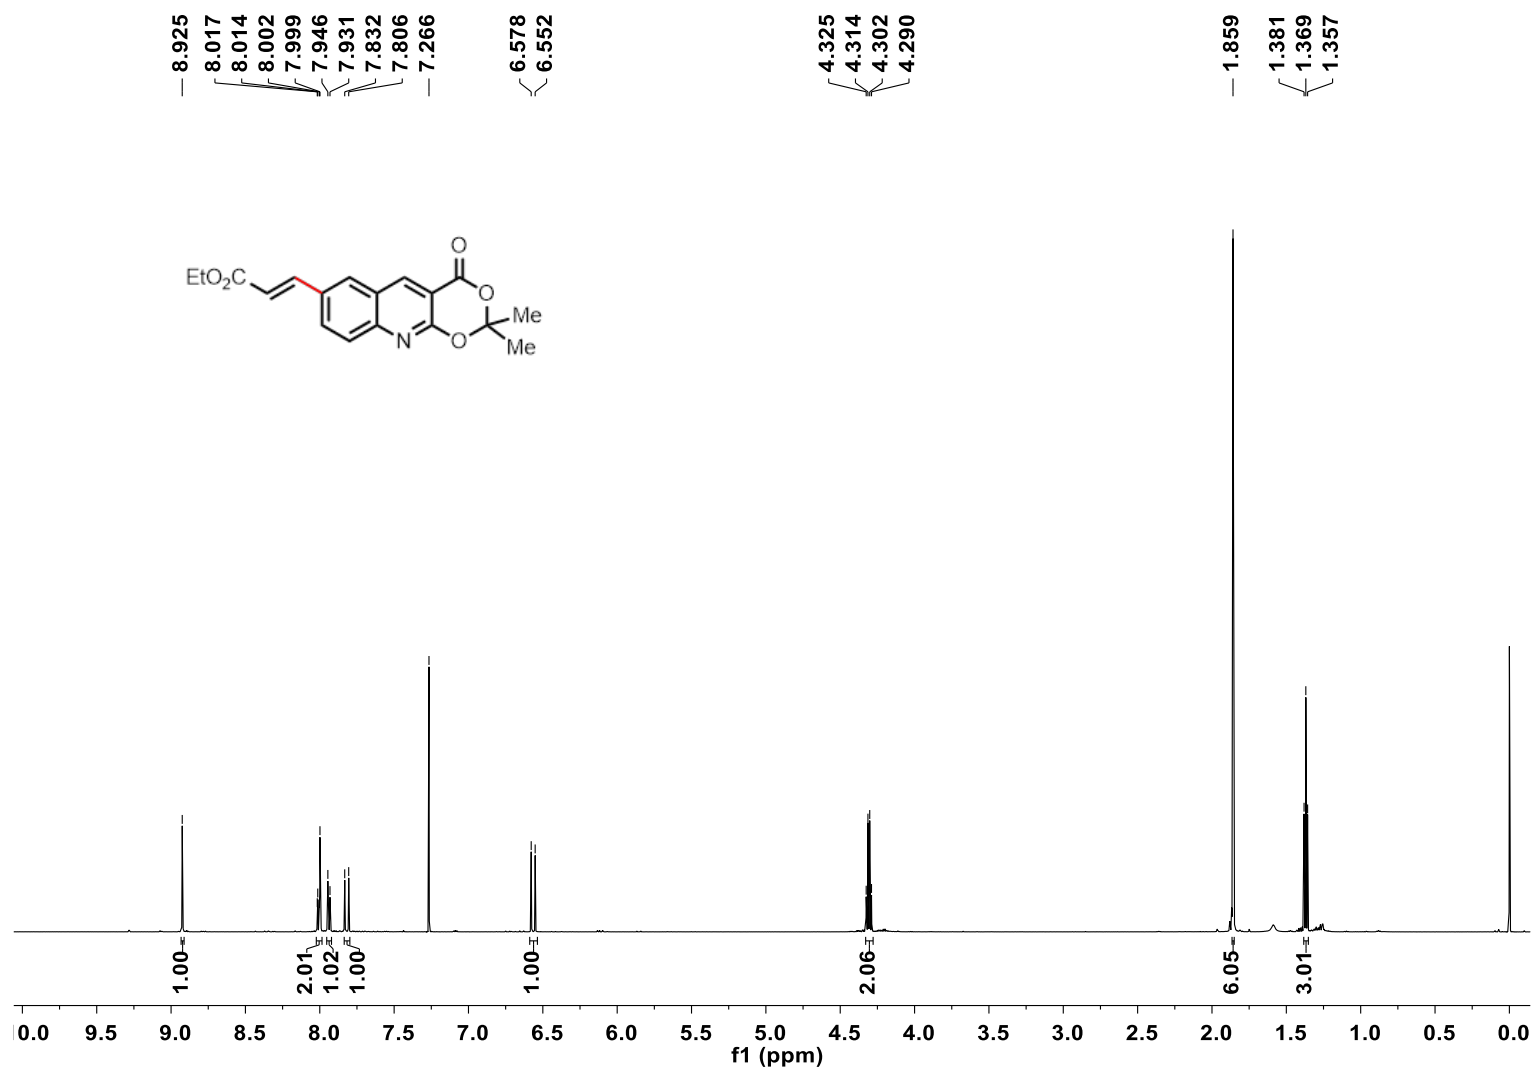



<sup>13</sup>C NMR (151 MHz, CDCl<sub>3</sub>) spectrum of **2y**

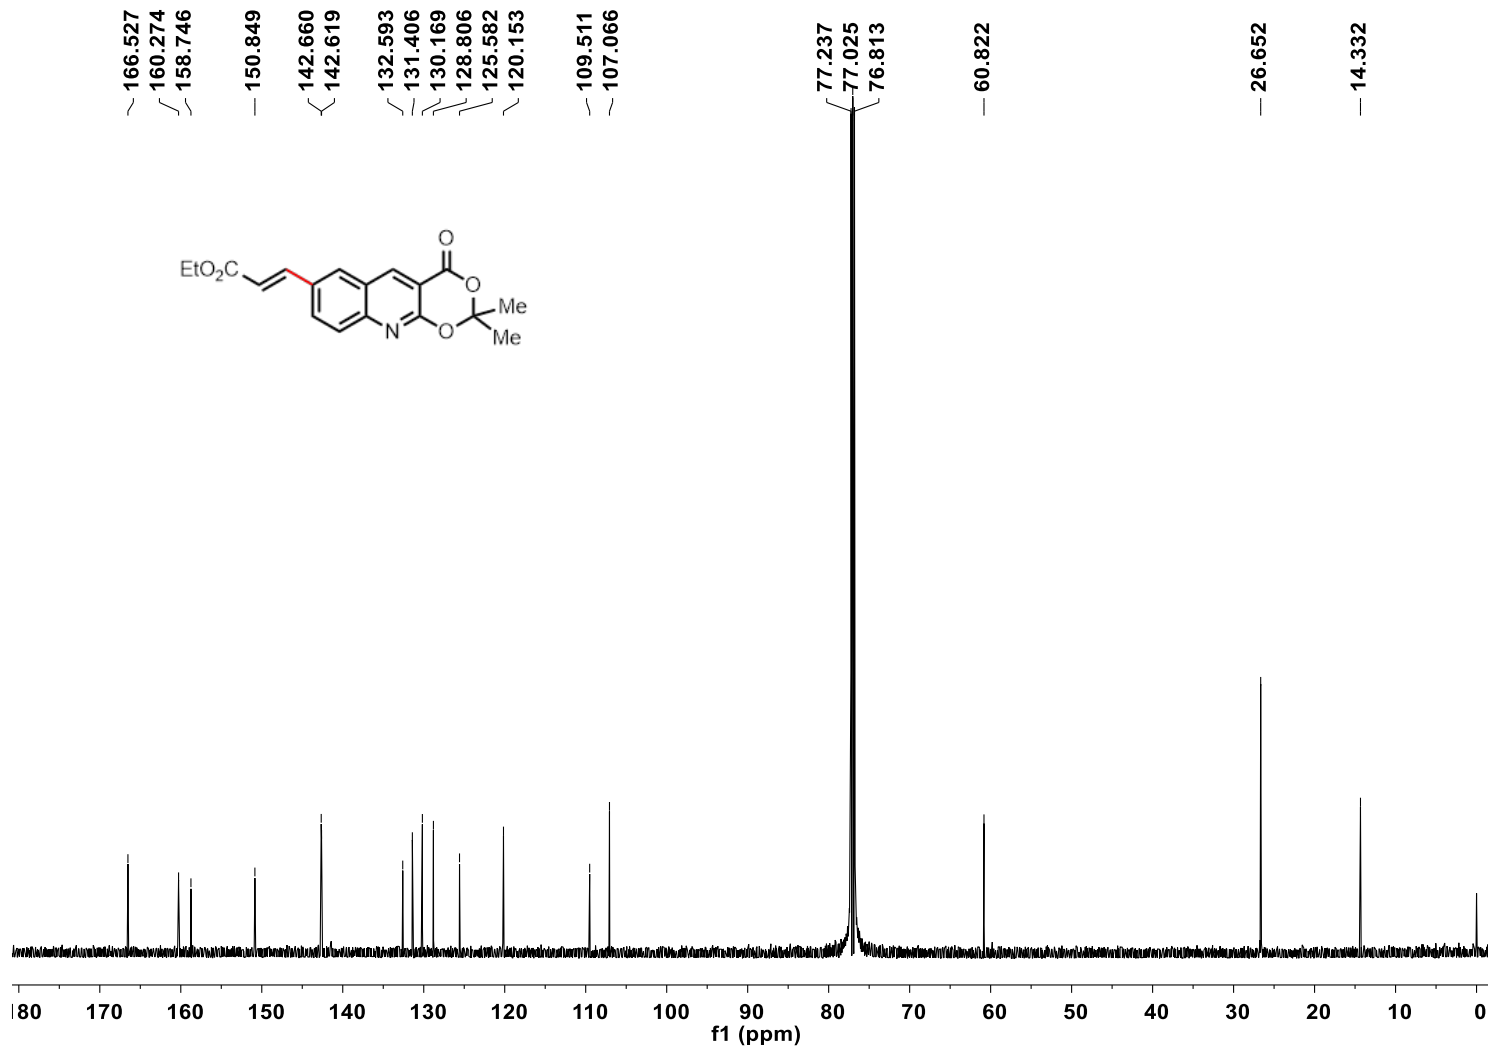

<sup>1</sup>H NMR (600 MHz, CDCl<sub>3</sub>) spectrum of **2z**

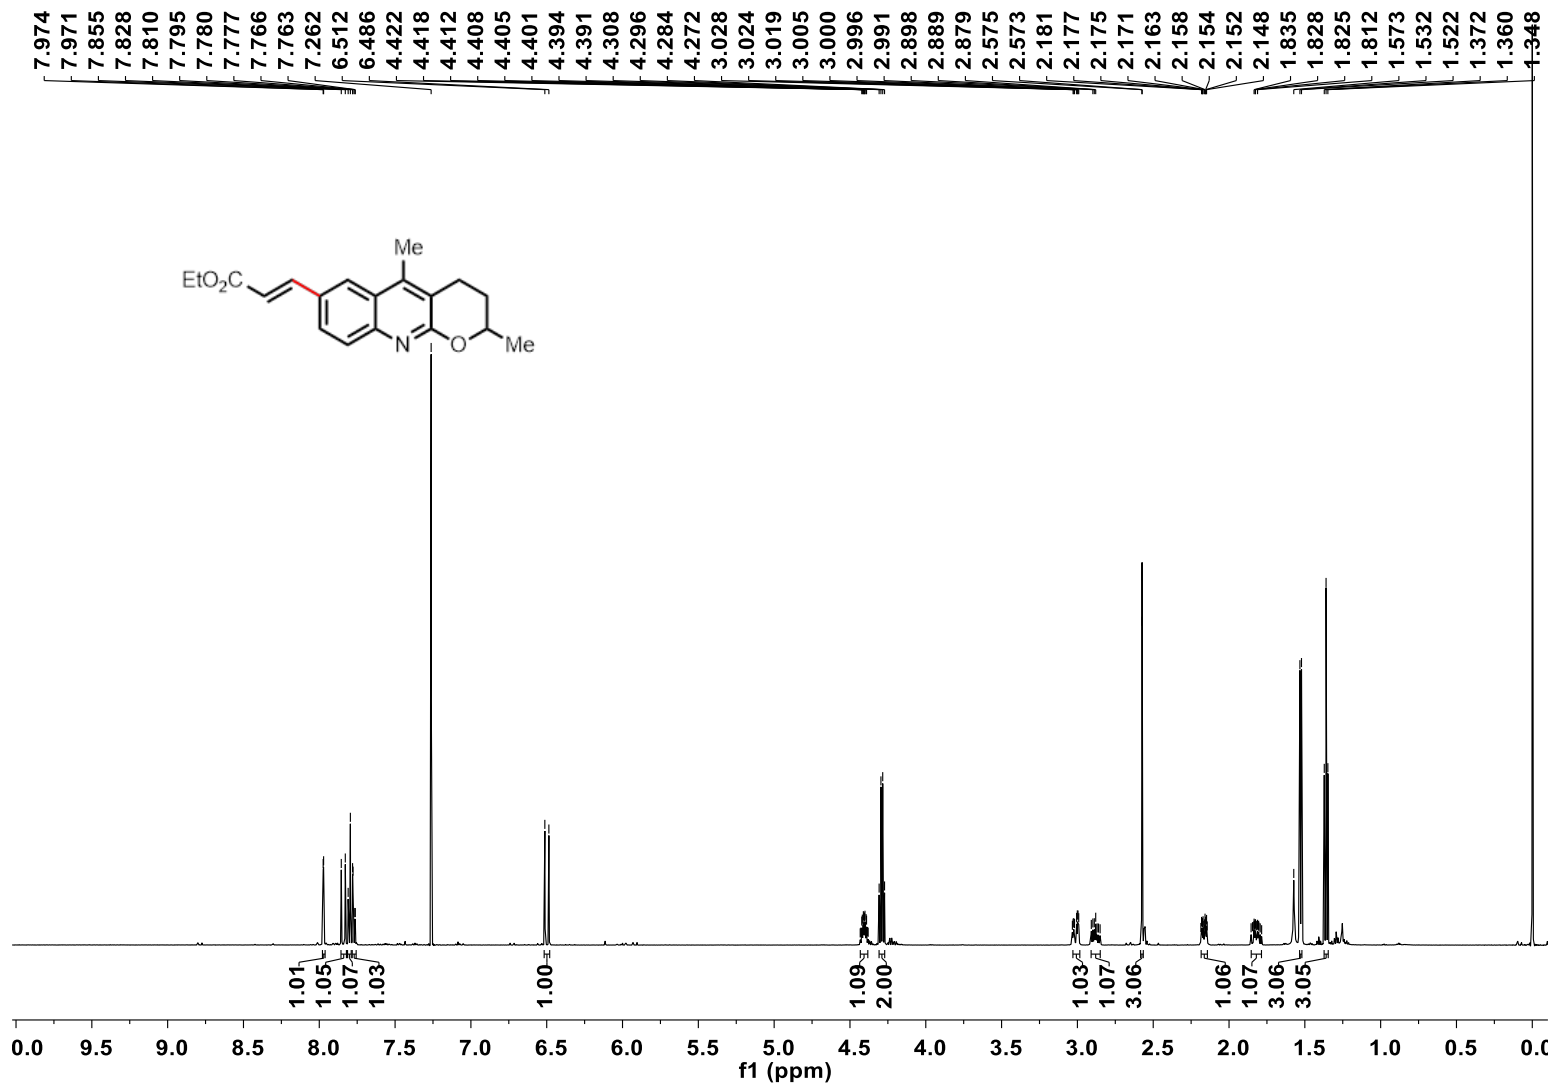

<sup>13</sup>C NMR (151 MHz, CDCl<sub>3</sub>) spectrum of **2z**

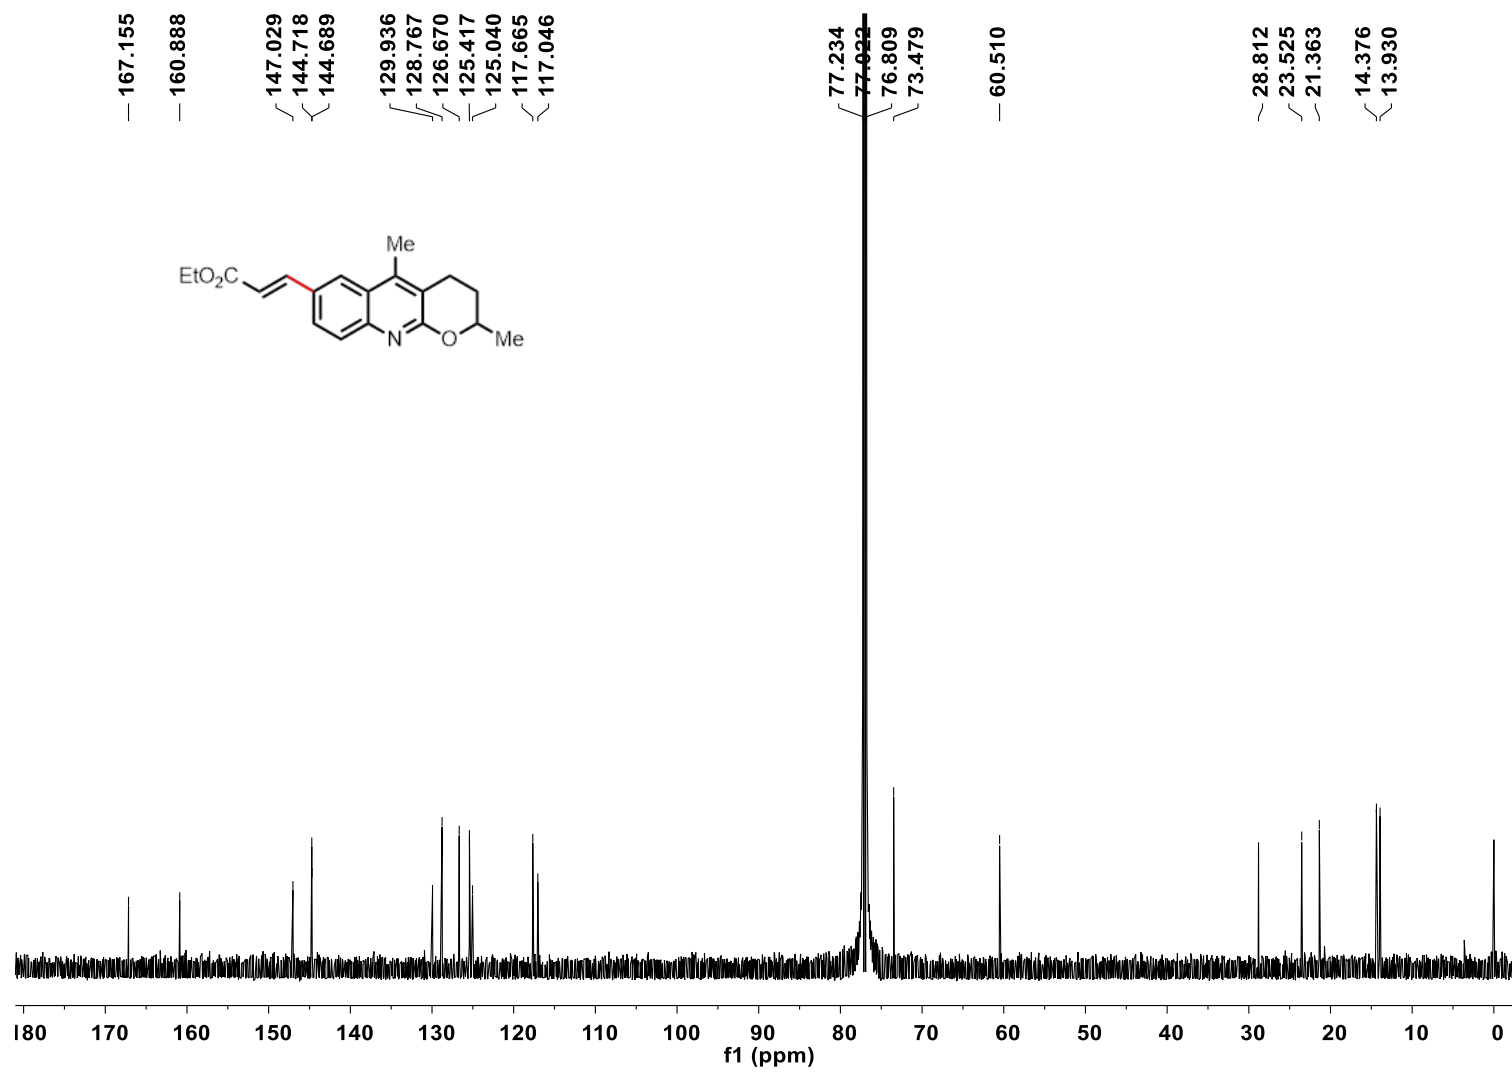

<sup>1</sup>H NMR (600 MHz, CDCl<sub>3</sub>) spectrum of **2aa**

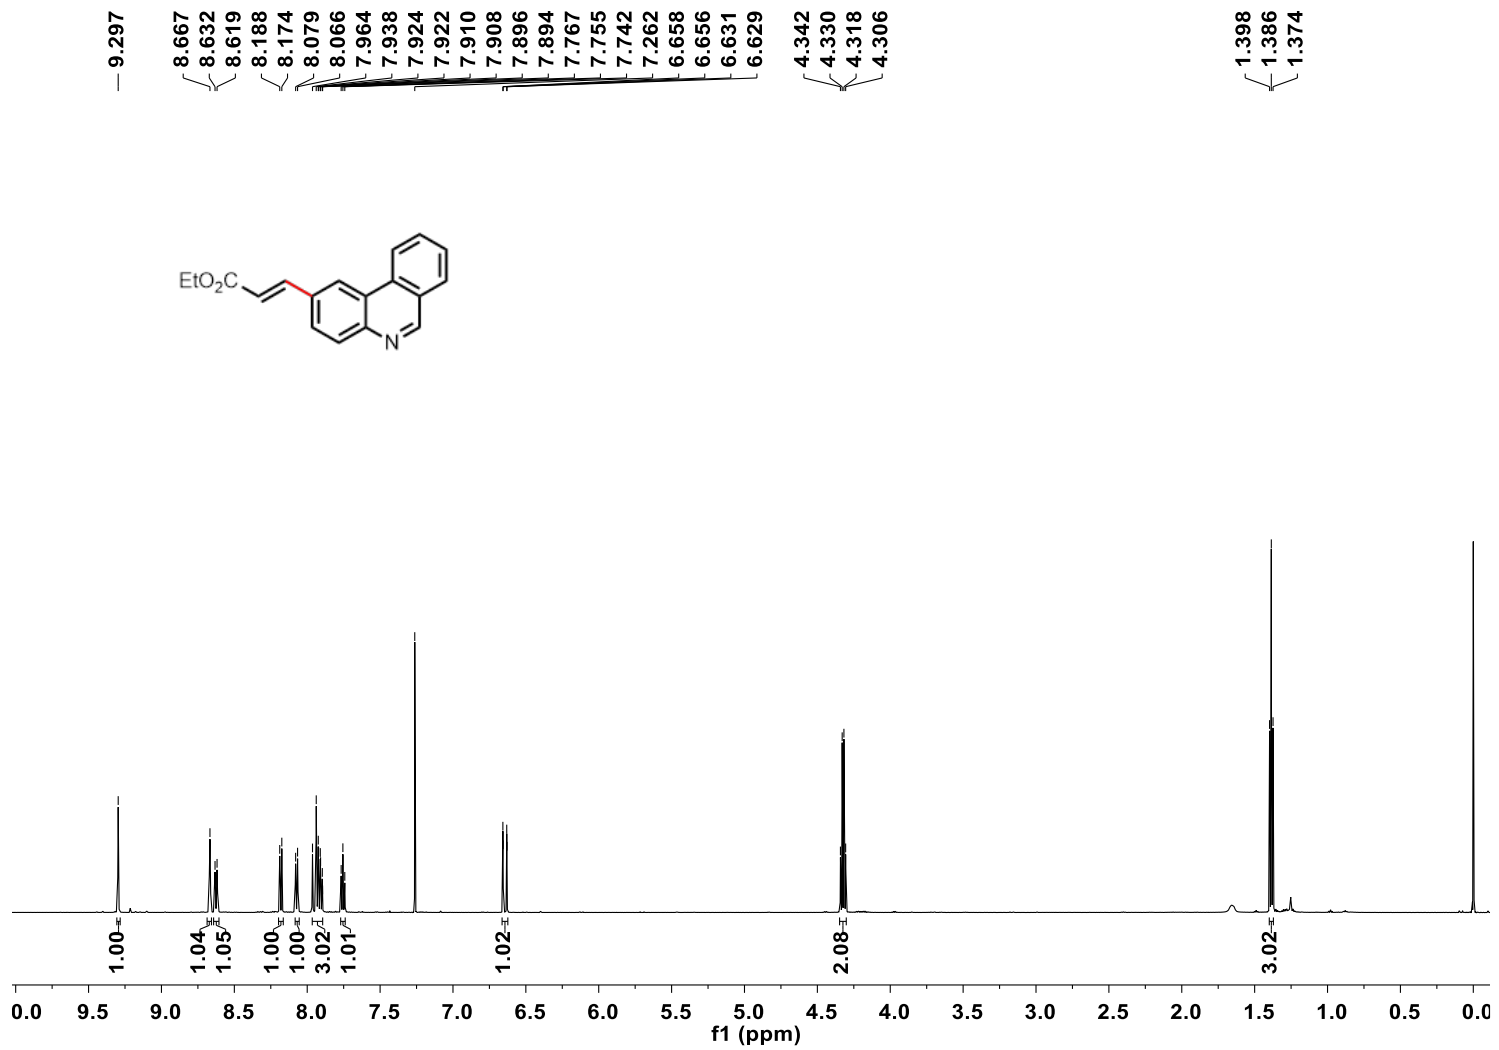

<sup>13</sup>C NMR (151 MHz, CDCl<sub>3</sub>) spectrum of **2aa**

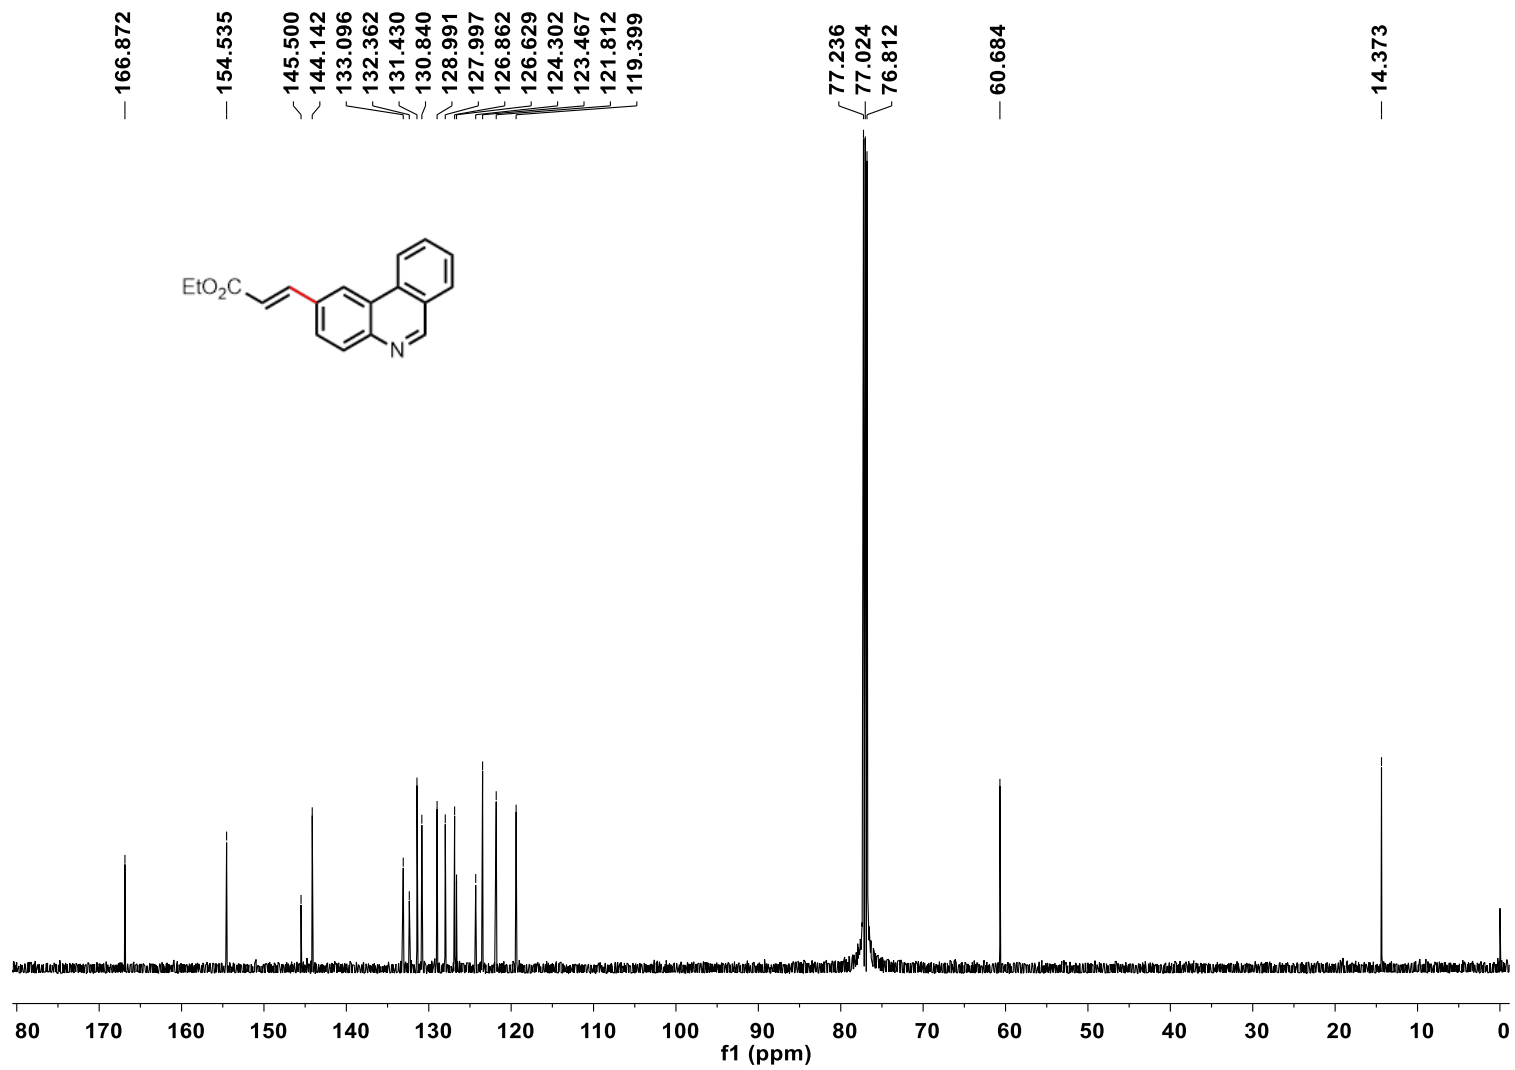

<sup>1</sup>H NMR (600 MHz, CDCl<sub>3</sub>) spectrum of **2ab**

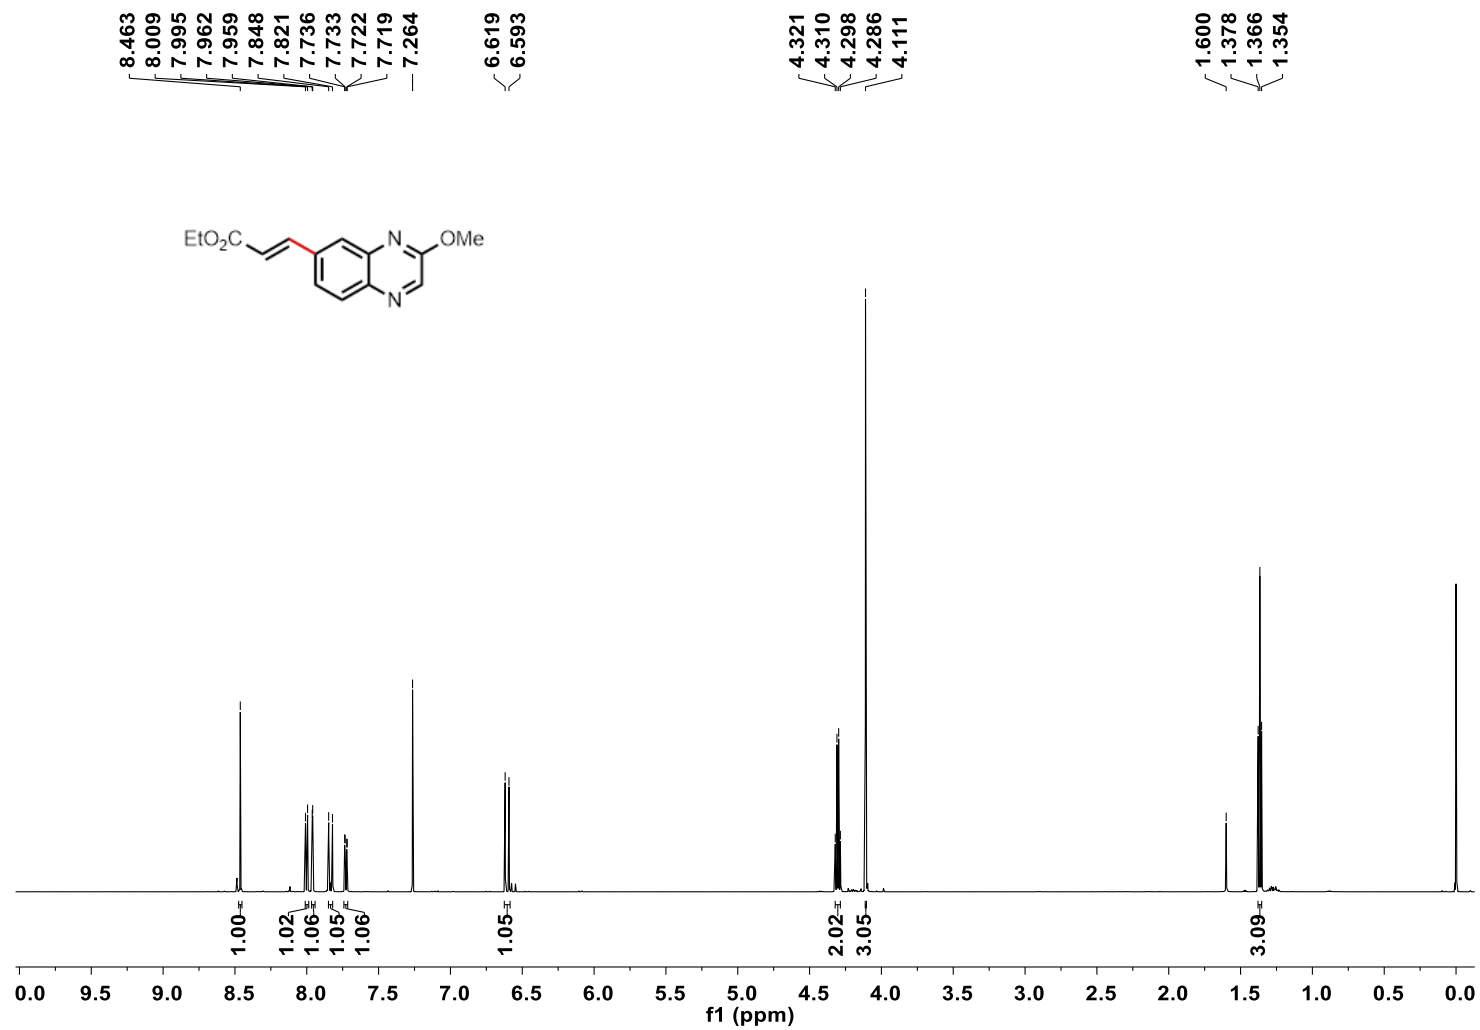

<sup>13</sup>C NMR (151 MHz, CDCl<sub>3</sub>) spectrum of **2ab**

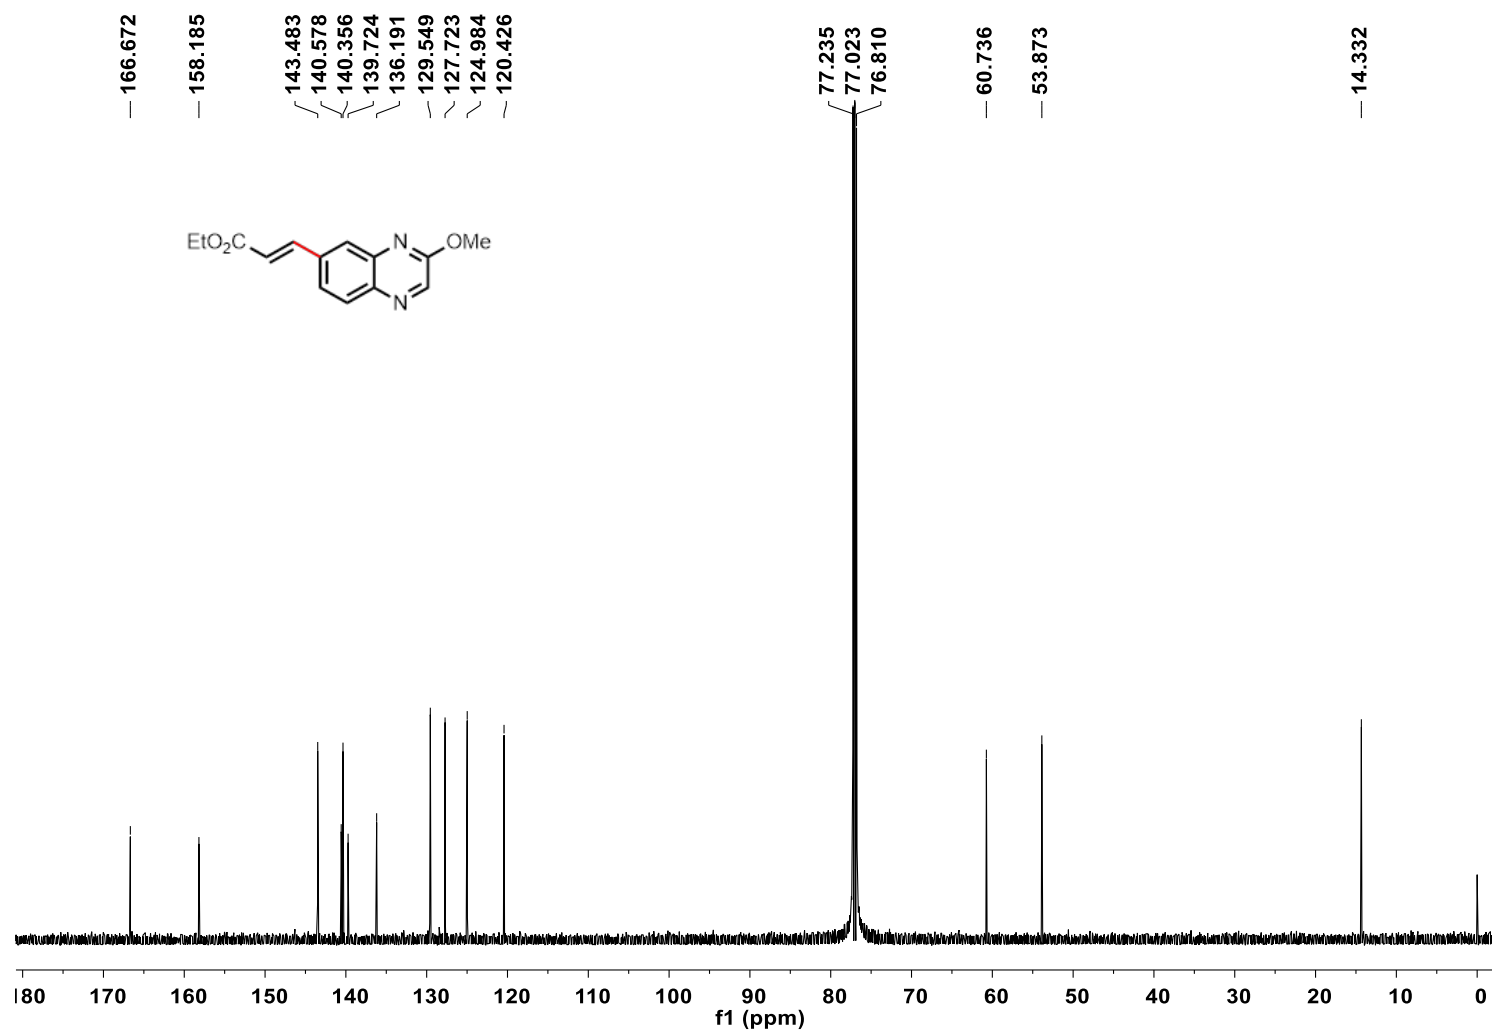

<sup>1</sup>H NMR (600 MHz, CDCl<sub>3</sub>) spectrum of **2ac**

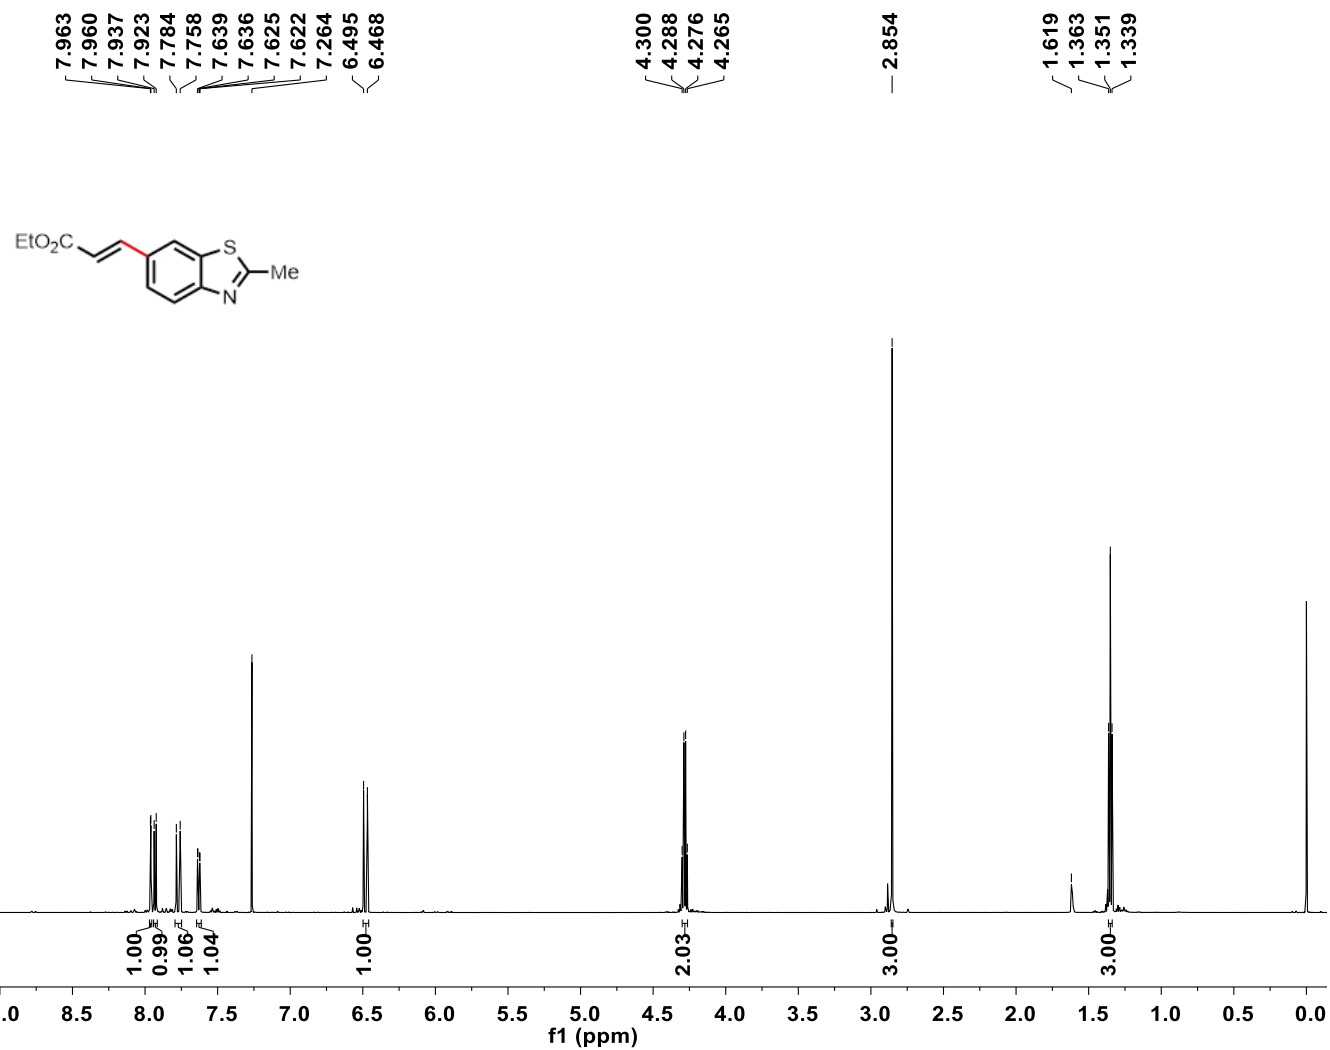



<sup>13</sup>C NMR (151 MHz, CDCl<sub>3</sub>) spectrum of **2ac**

~ 168.965  
~ 166.886

— 154.624

— 143.978

~ 136.435

~ 131.318

~ 125.537

~ 122.689

~ 121.617

~ 118.499

77.236

77.024

76.811

— 60.590

— 20.318

— 14.341

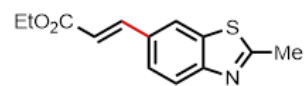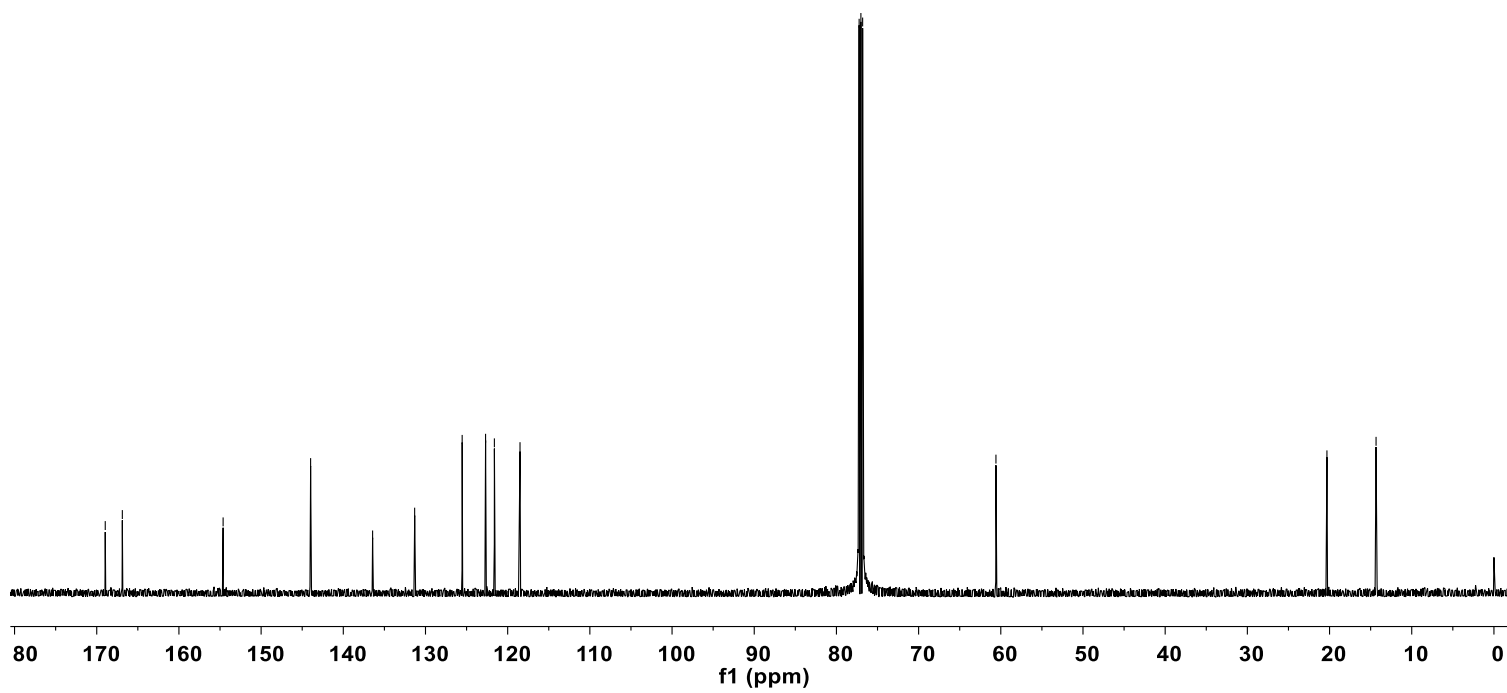

<sup>1</sup>H NMR (600 MHz, CDCl<sub>3</sub>) spectrum of **2ad**

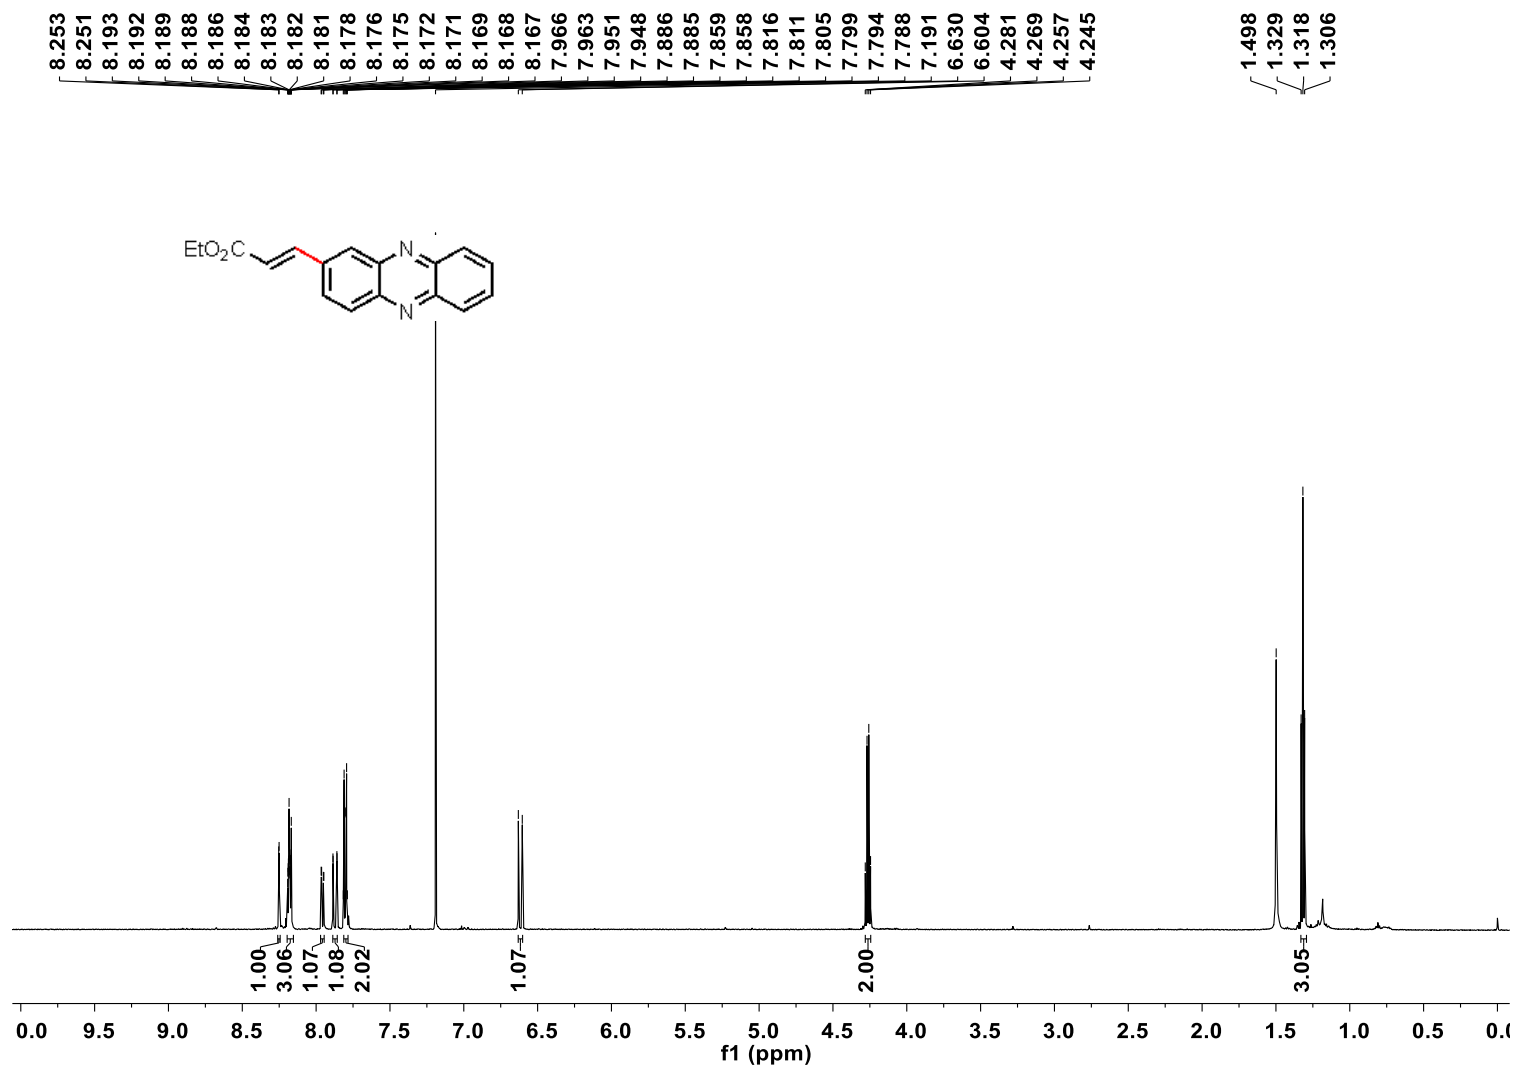

<sup>13</sup>C NMR (151 MHz, CDCl<sub>3</sub>) spectrum of **2ad**

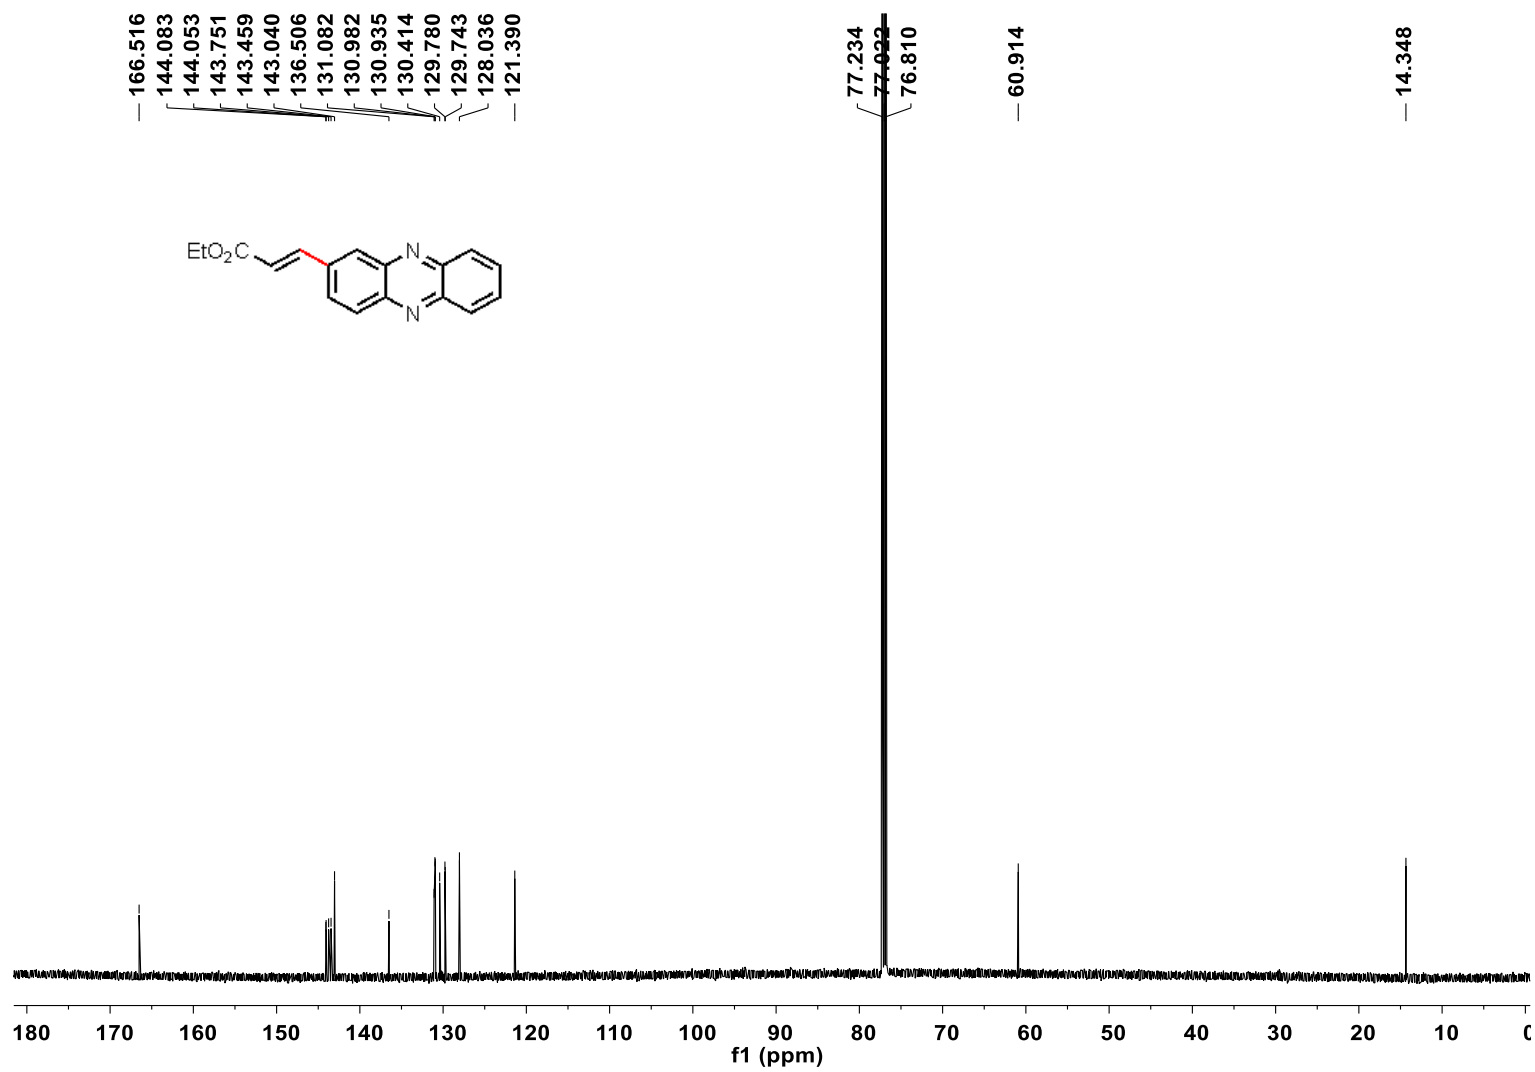

$^1\text{H}$  NMR (600 MHz,  $\text{CDCl}_3$ ) spectrum of **2ae**

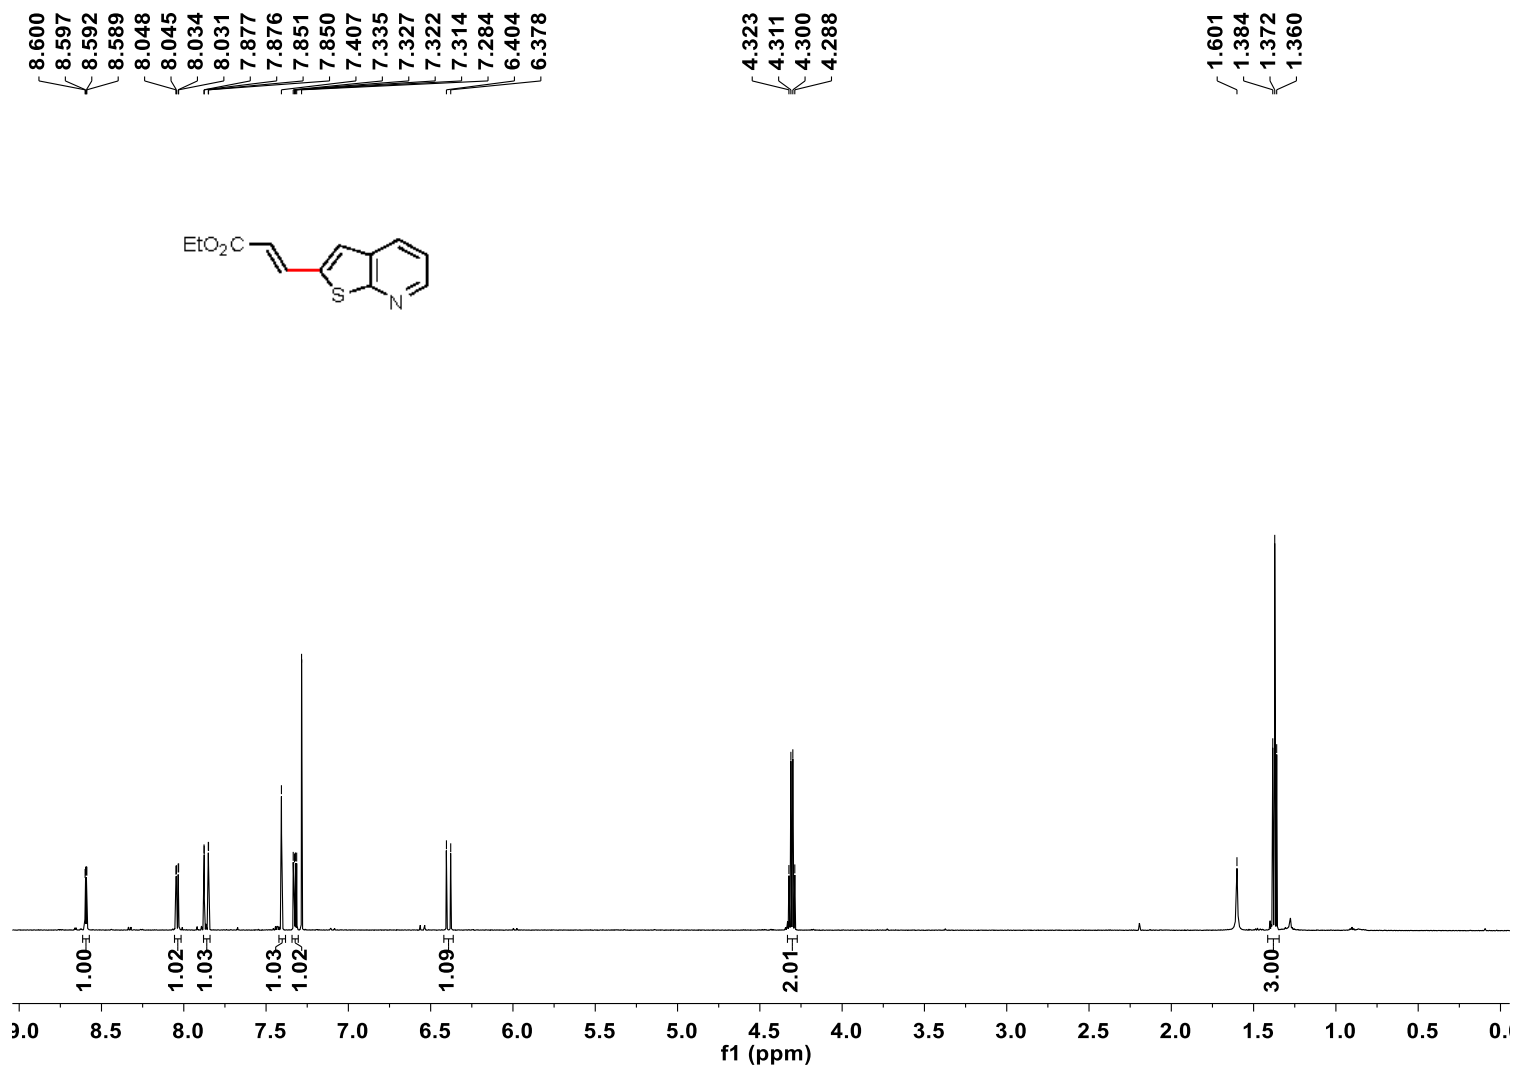

<sup>13</sup>C NMR (151 MHz, CDCl<sub>3</sub>) spectrum of **2ae**

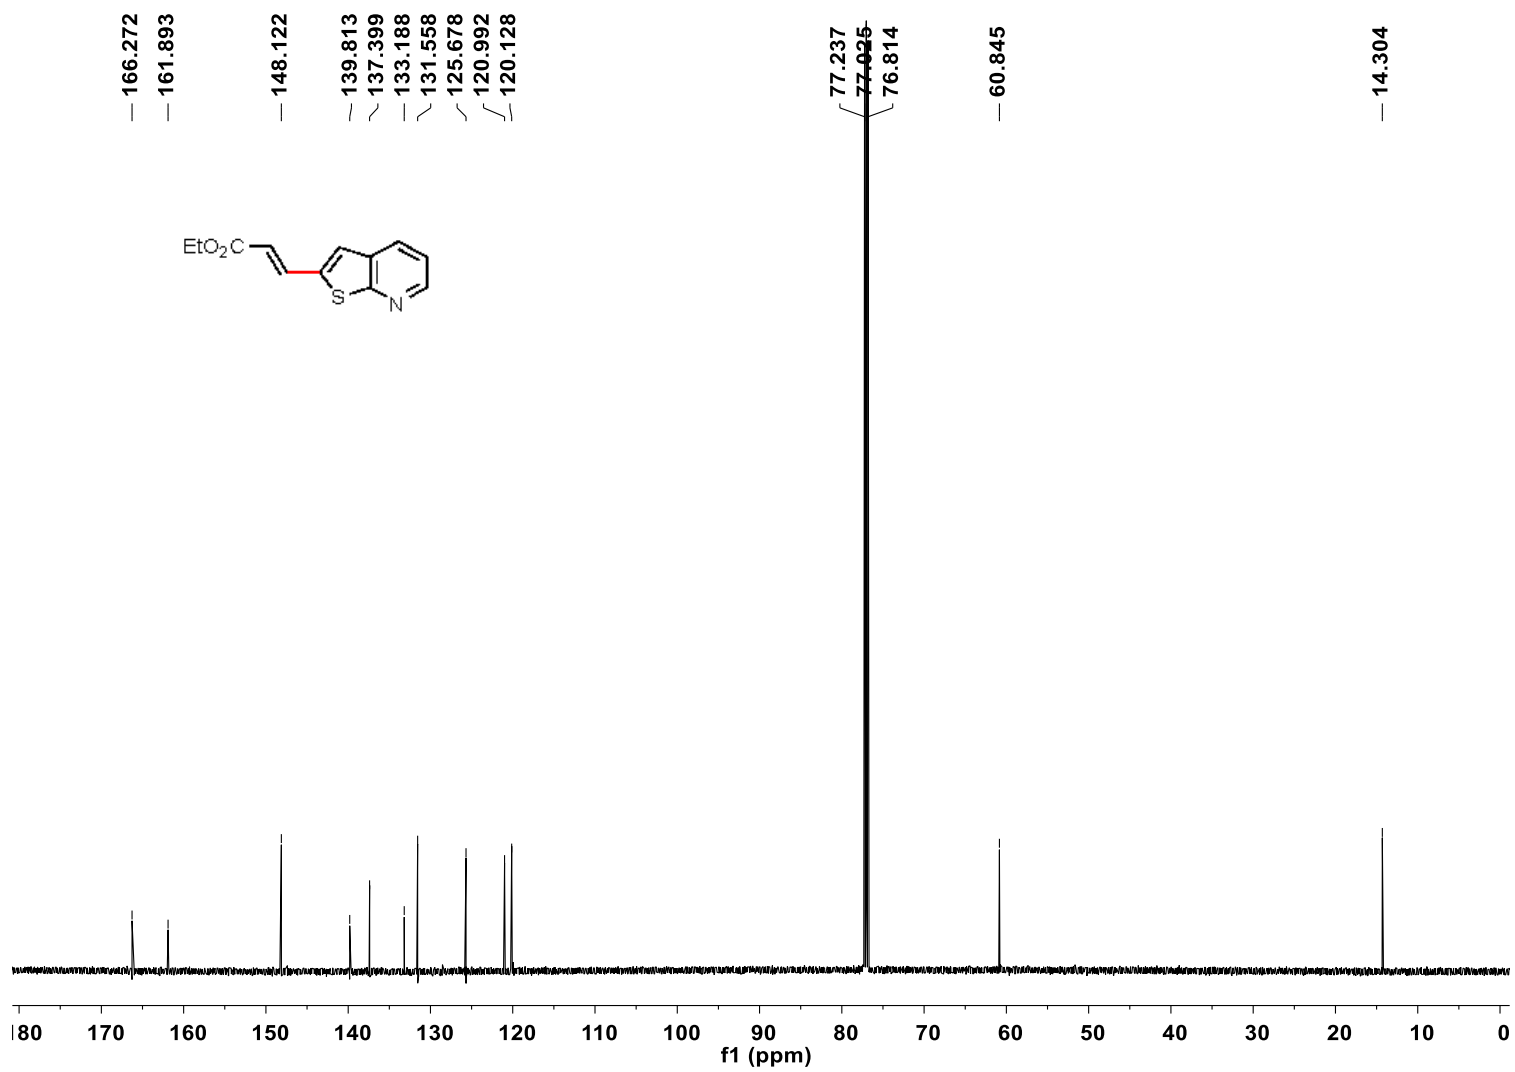

$^1\text{H}$  NMR (600 MHz,  $\text{CDCl}_3$ ) spectrum of **2af**

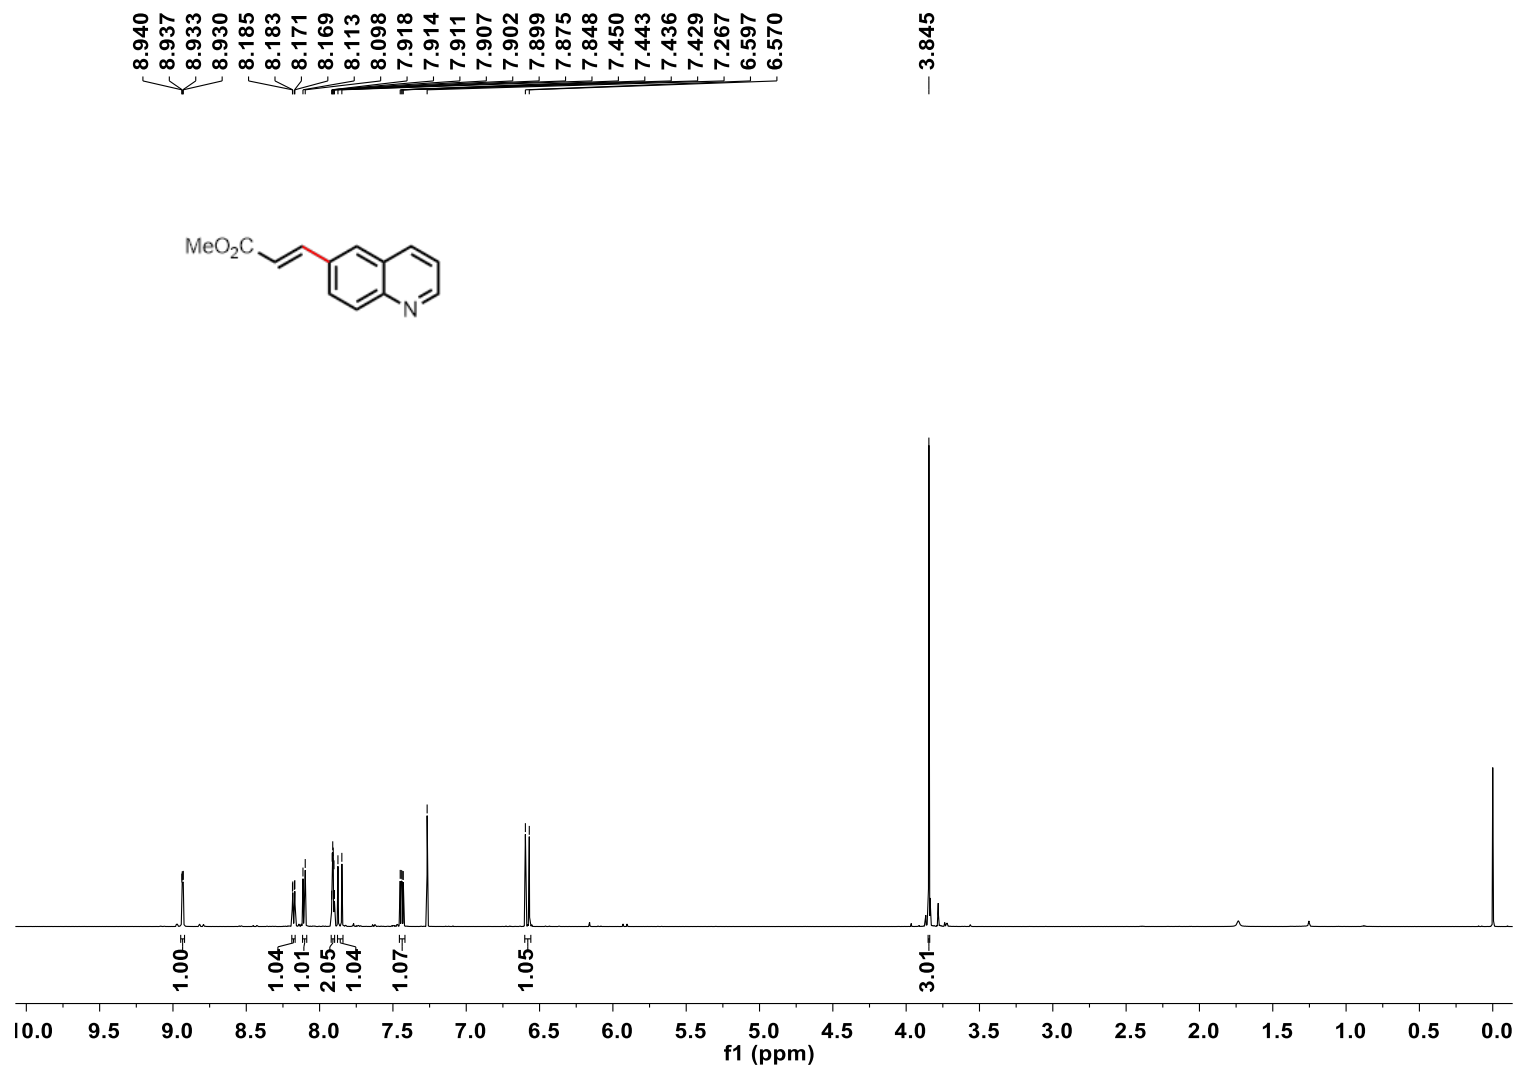

<sup>13</sup>C NMR (151 MHz, CDCl<sub>3</sub>) spectrum of **2af**

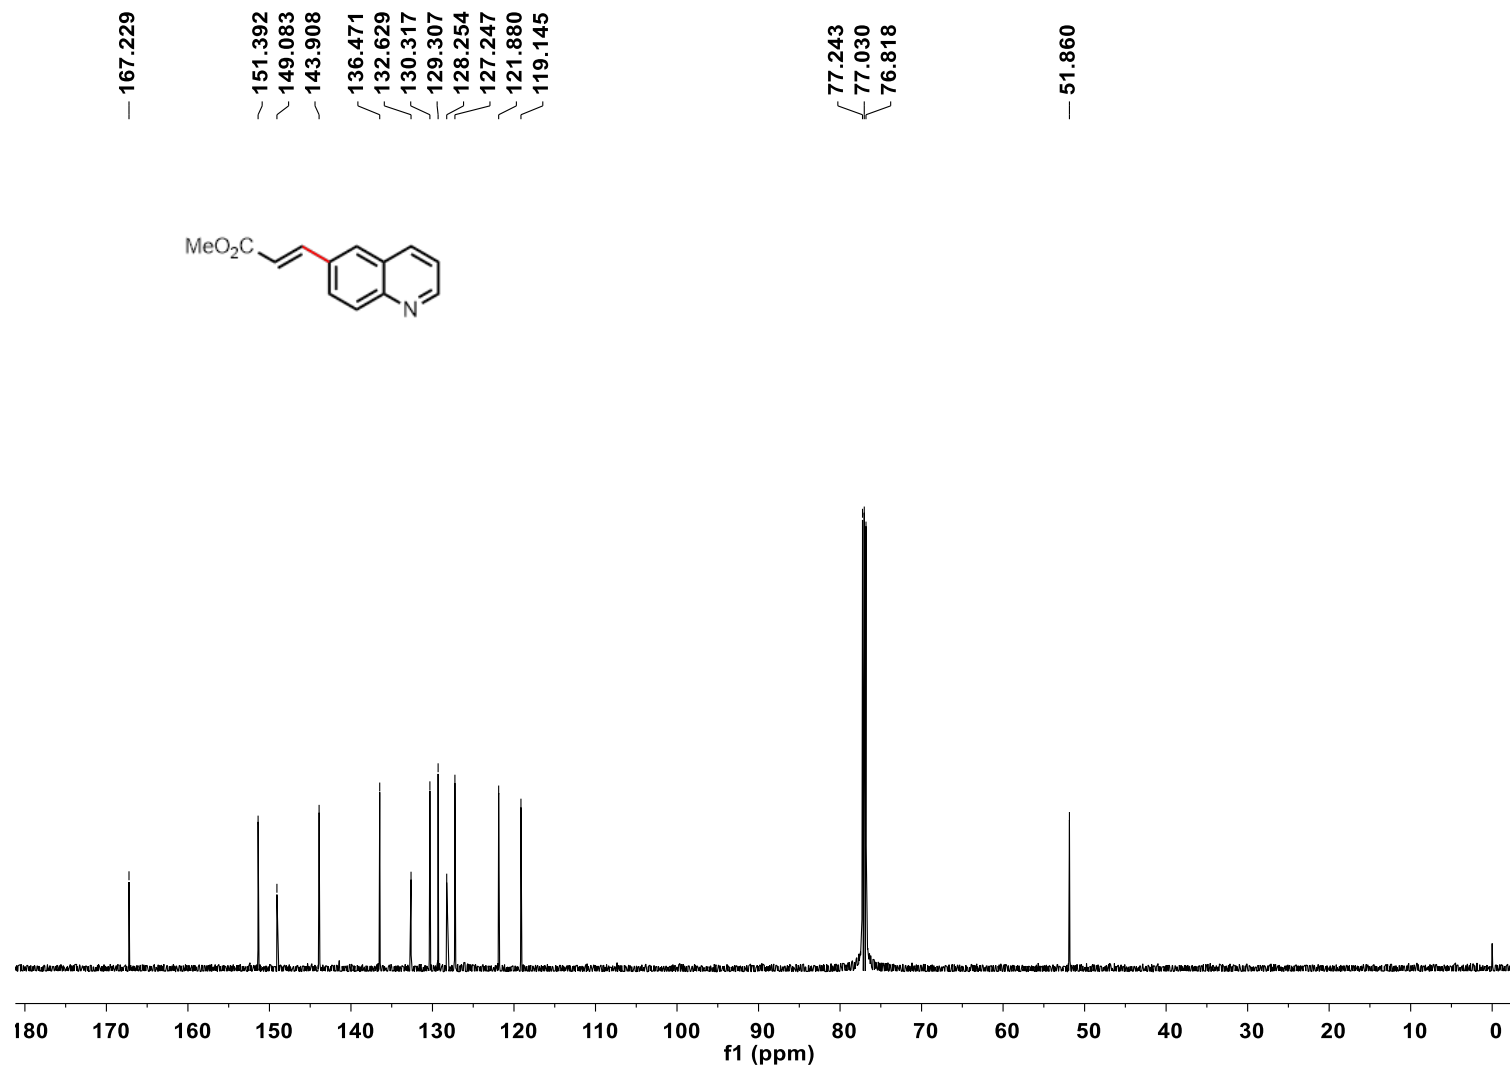

$^1\text{H}$  NMR (600 MHz,  $\text{CDCl}_3$ ) spectrum of **2ag**

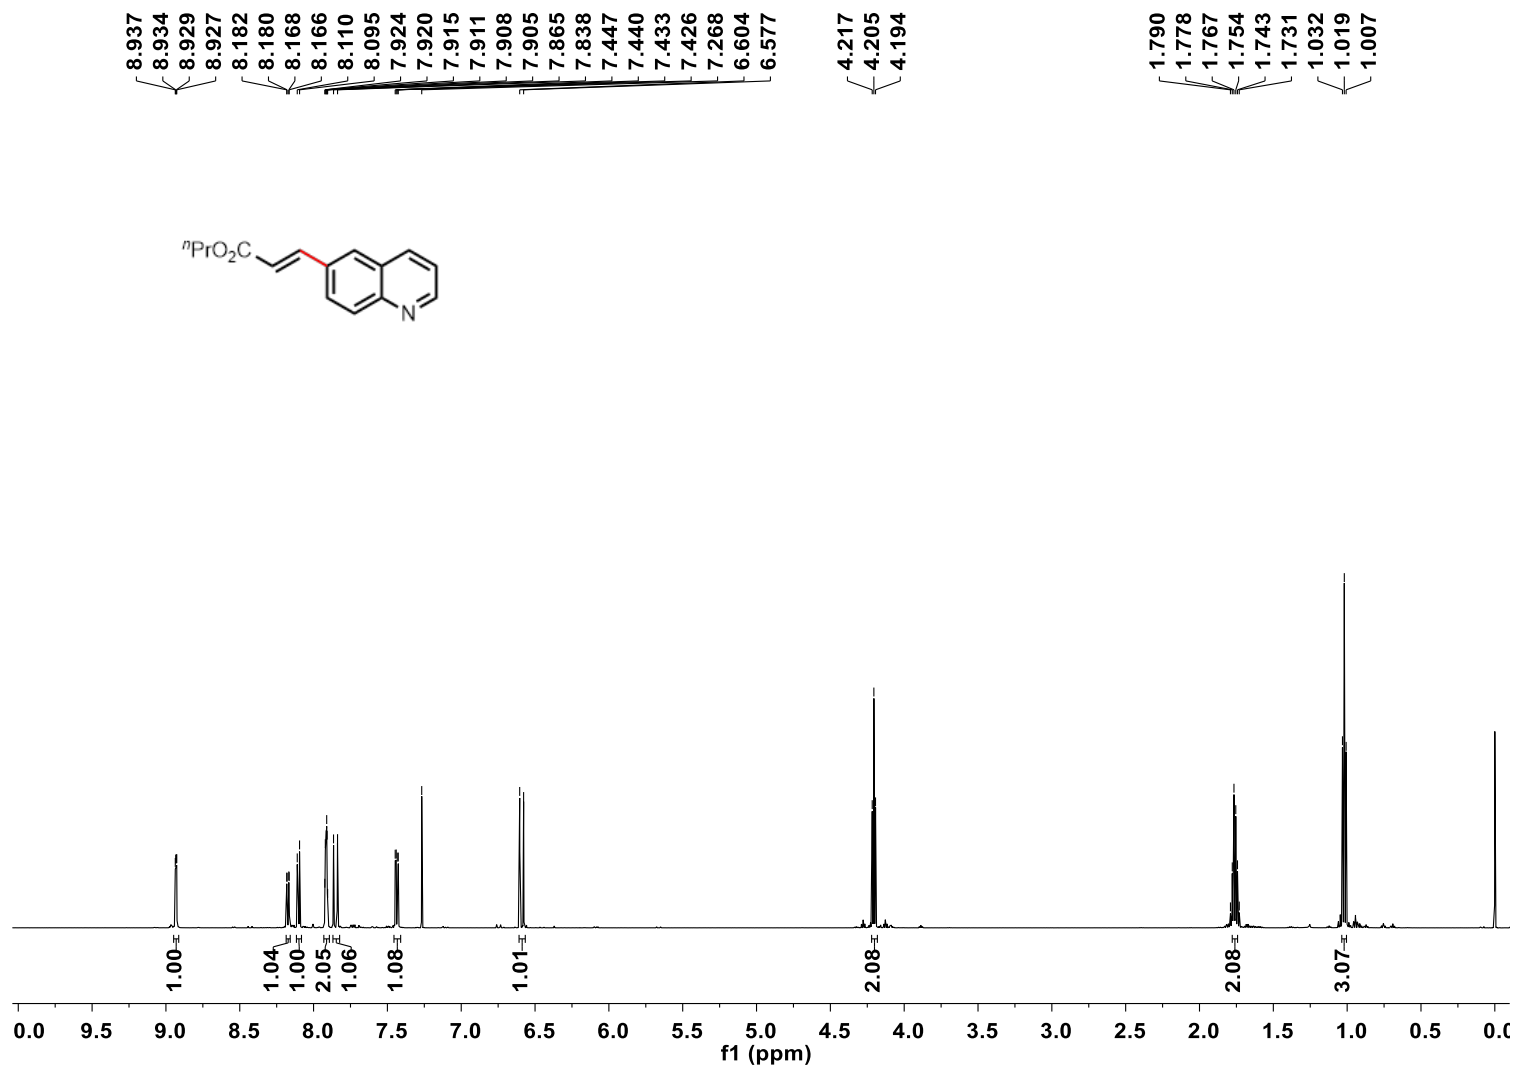



<sup>13</sup>C NMR (151 MHz, CDCl<sub>3</sub>) spectrum of **2ag**

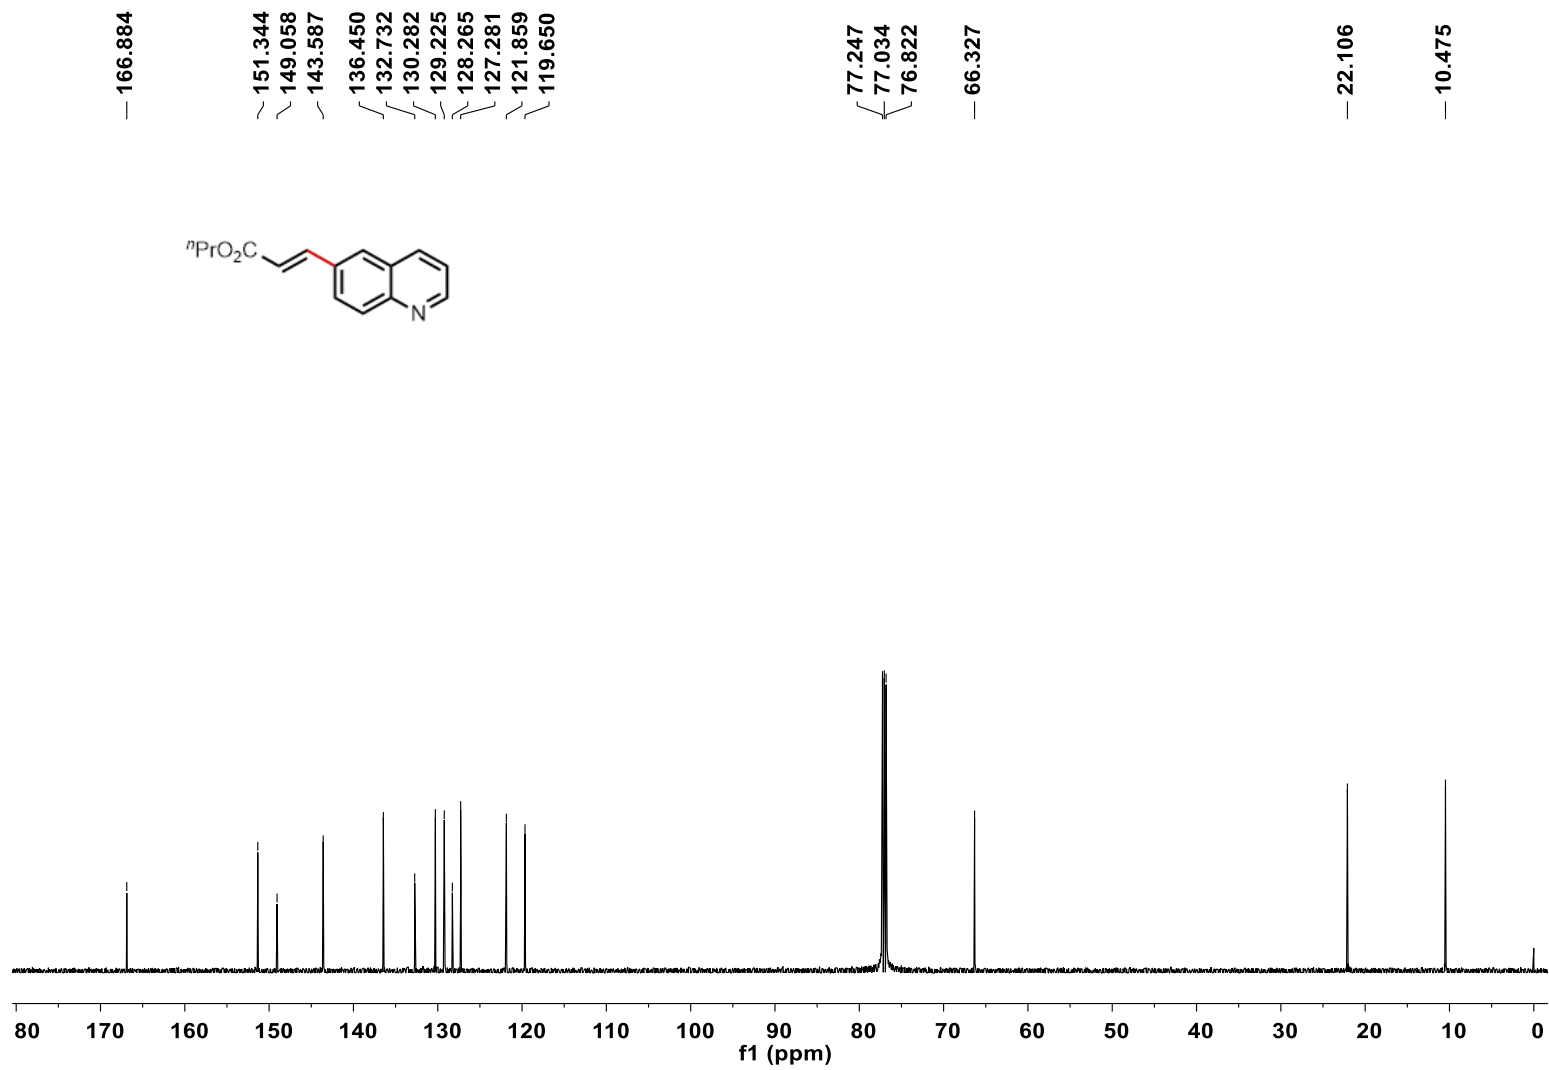

<sup>1</sup>H NMR (600 MHz, CDCl<sub>3</sub>) spectrum of **2ah**

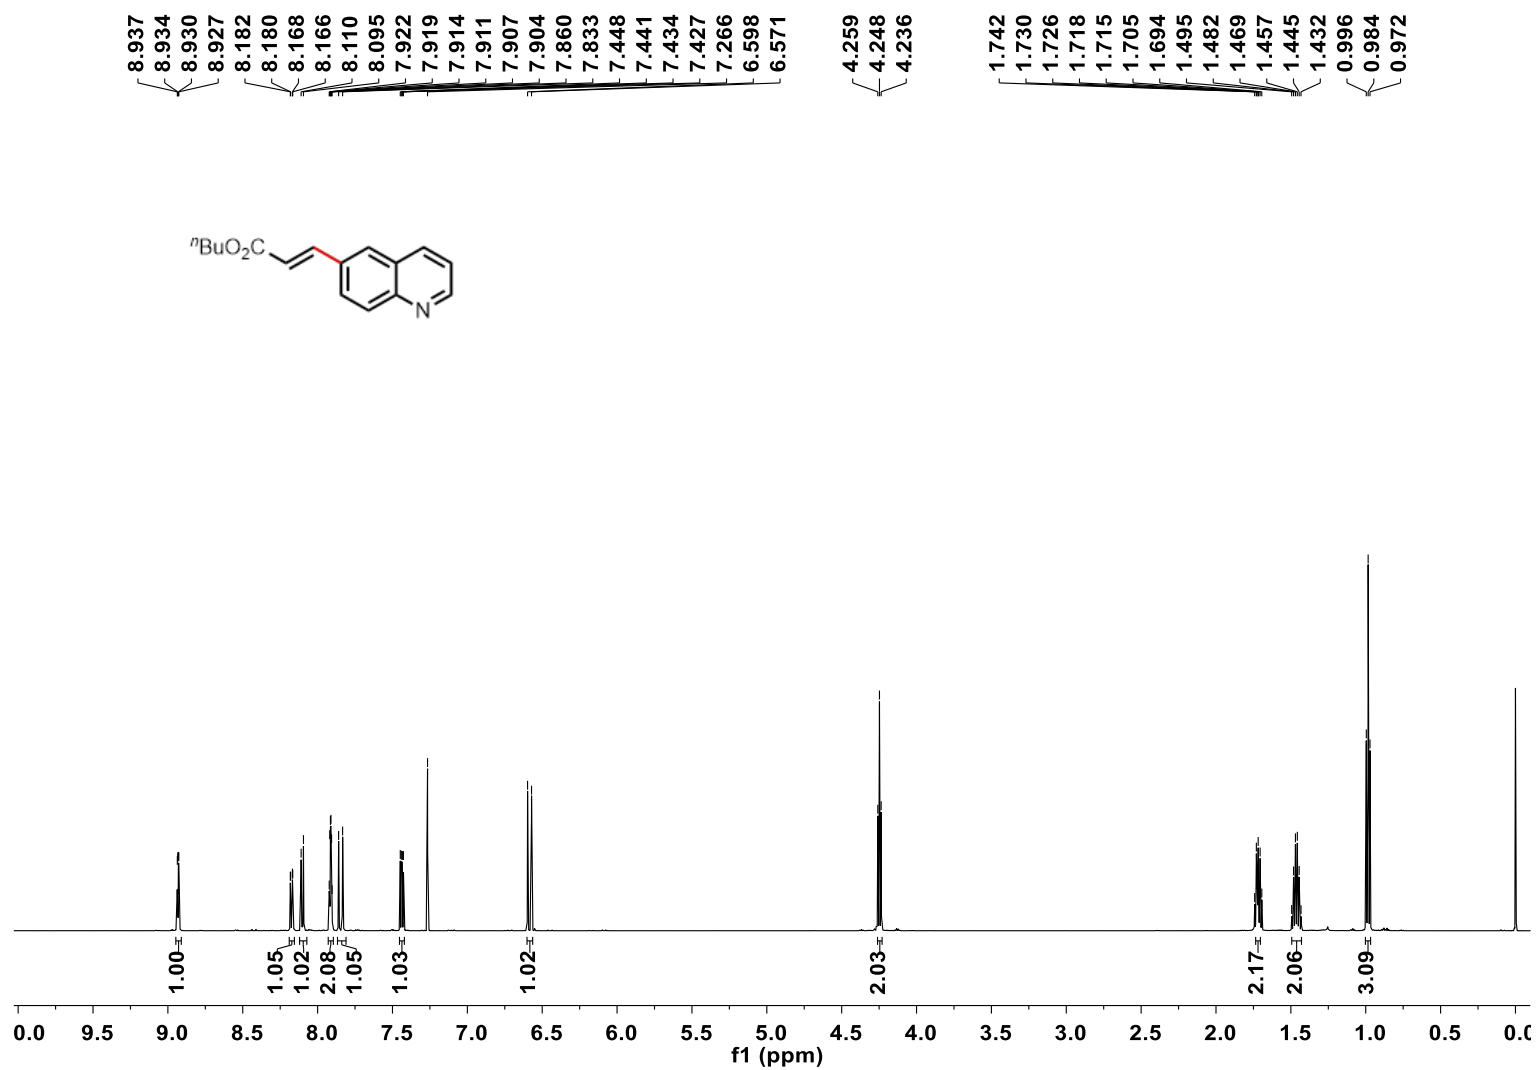

<sup>13</sup>C NMR (151 MHz, CDCl<sub>3</sub>) spectrum of **2ah**

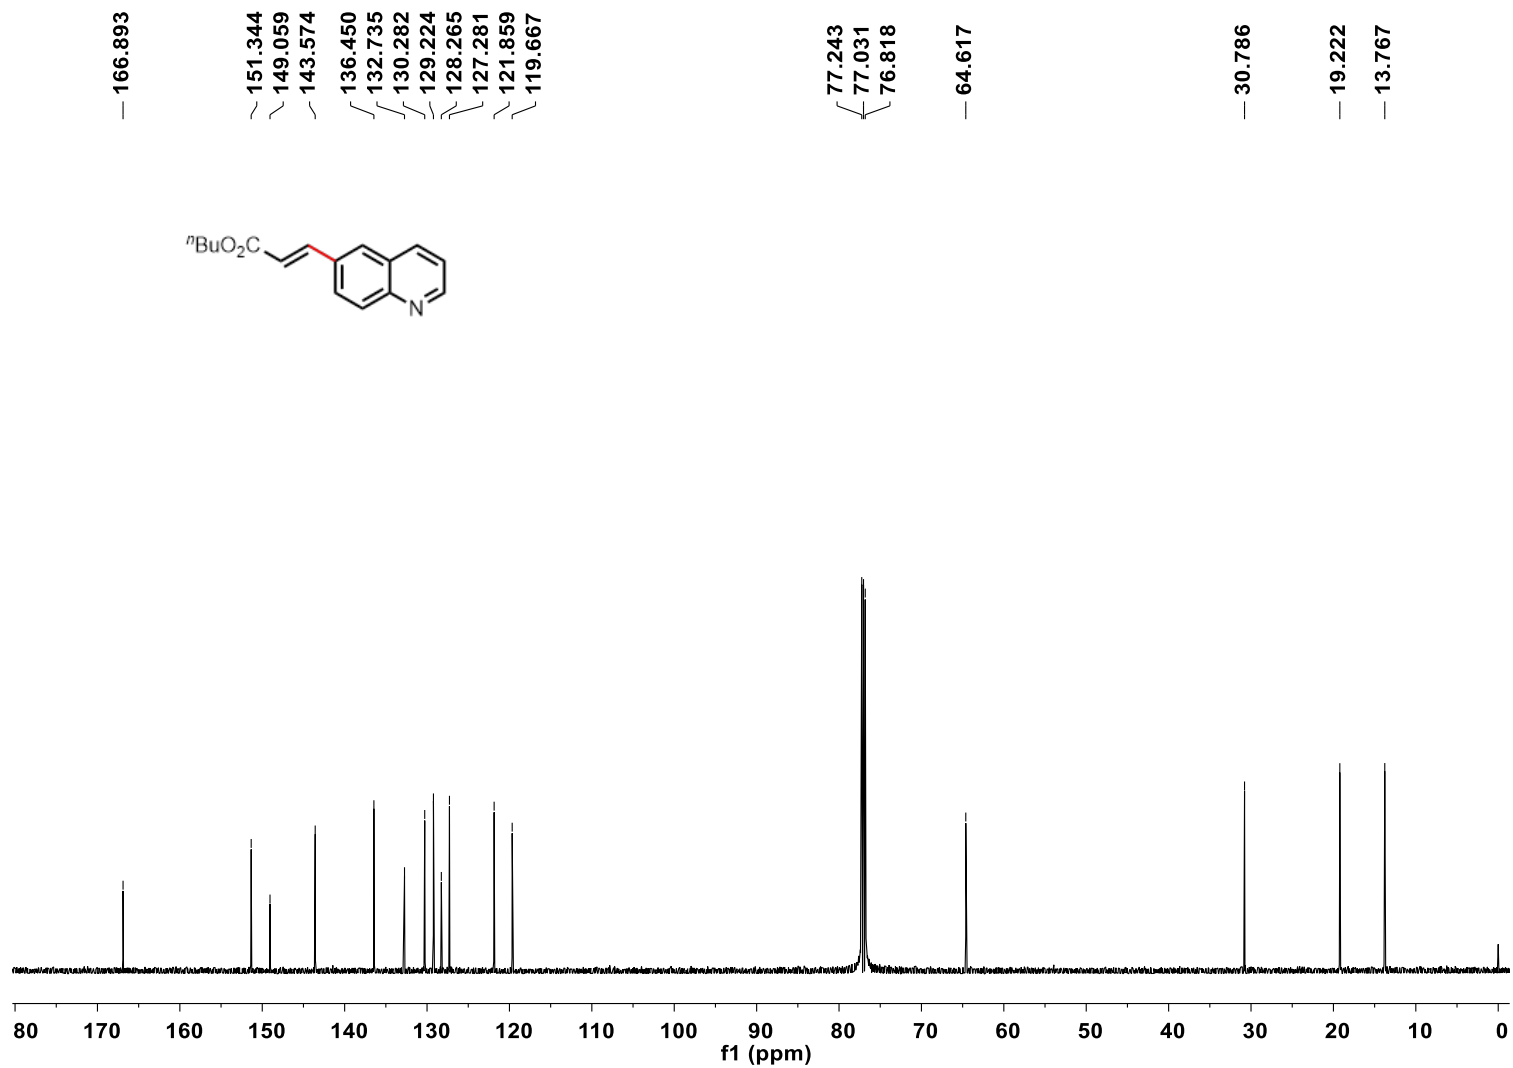

<sup>1</sup>H NMR (600 MHz, CDCl<sub>3</sub>) spectrum of **2ai**

8.936  
8.933  
8.929  
8.926  
8.181  
8.179  
8.167  
8.165  
8.111  
8.099  
8.095  
7.928  
7.925  
7.916  
7.913  
7.865  
7.838  
7.446  
7.439  
7.432  
7.425  
7.270  
6.613  
6.587  
  
4.037  
4.026  
  
2.076  
2.065  
2.053  
2.042  
2.031  
2.020  
2.009  
  
1.015  
1.004

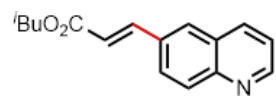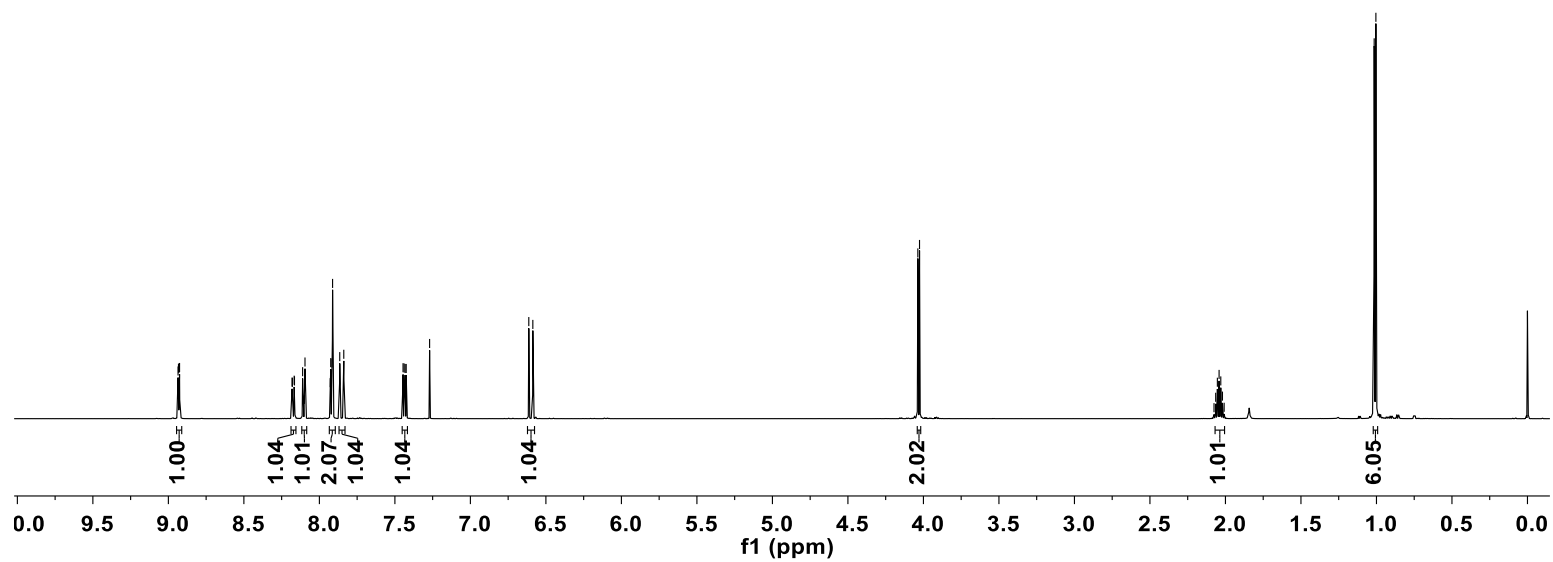

<sup>13</sup>C NMR (151 MHz, CDCl<sub>3</sub>) spectrum of **2ai**

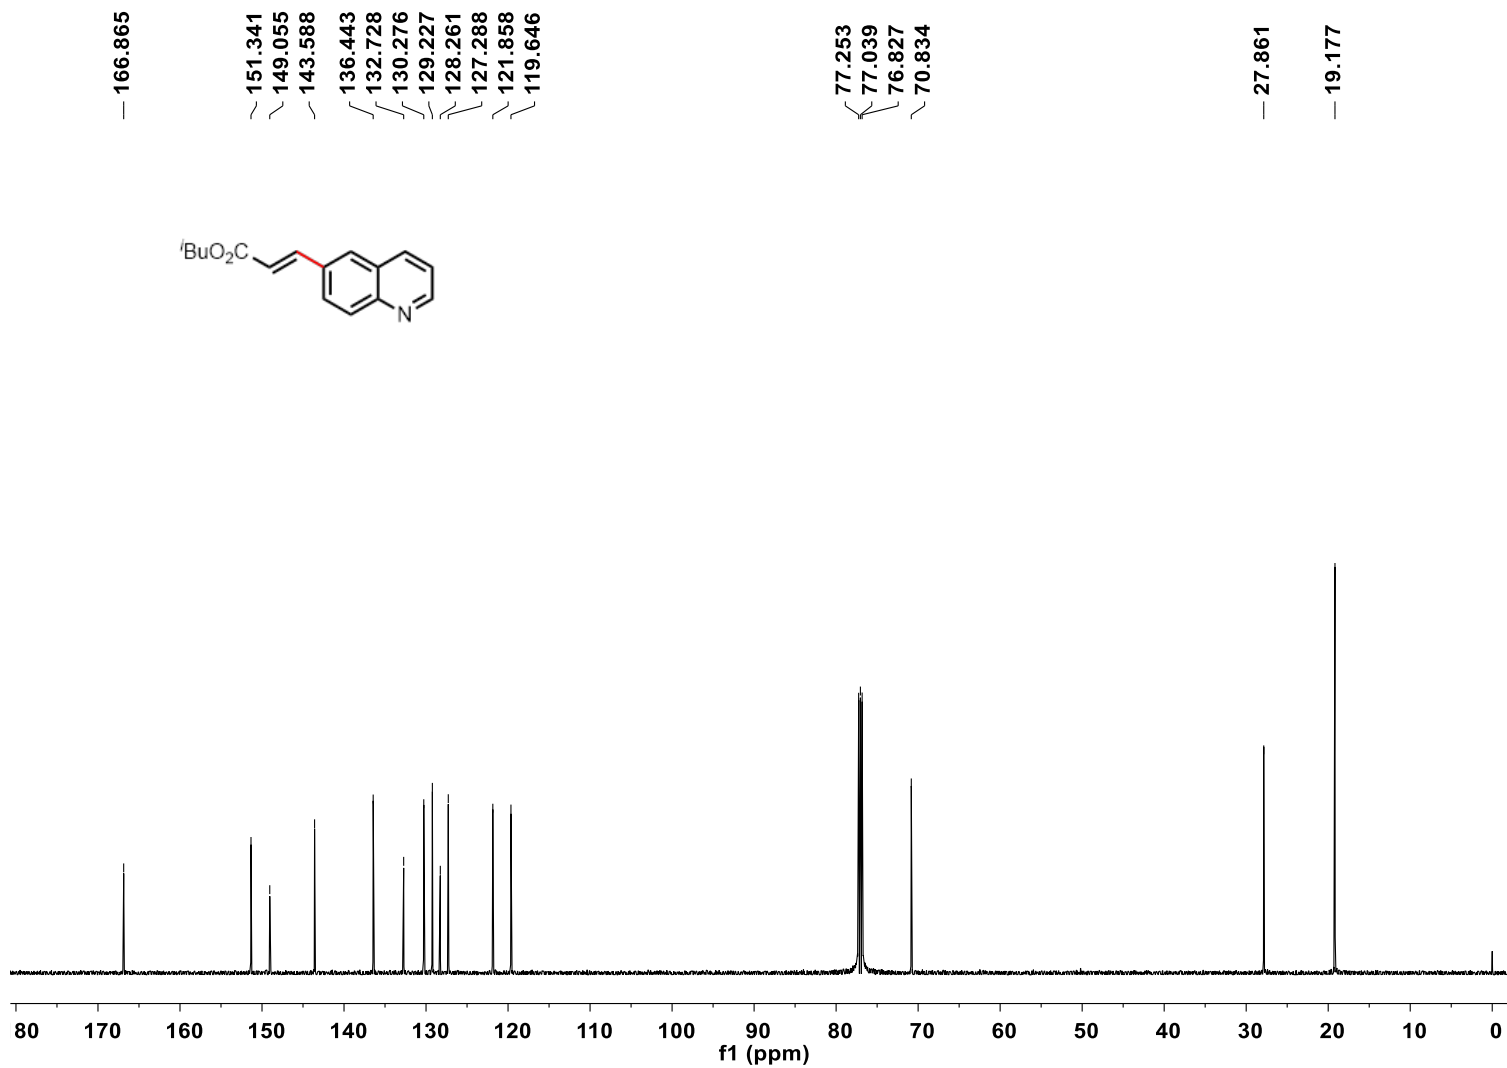

<sup>1</sup>H NMR (600 MHz, CDCl<sub>3</sub>) spectrum of **2aj**

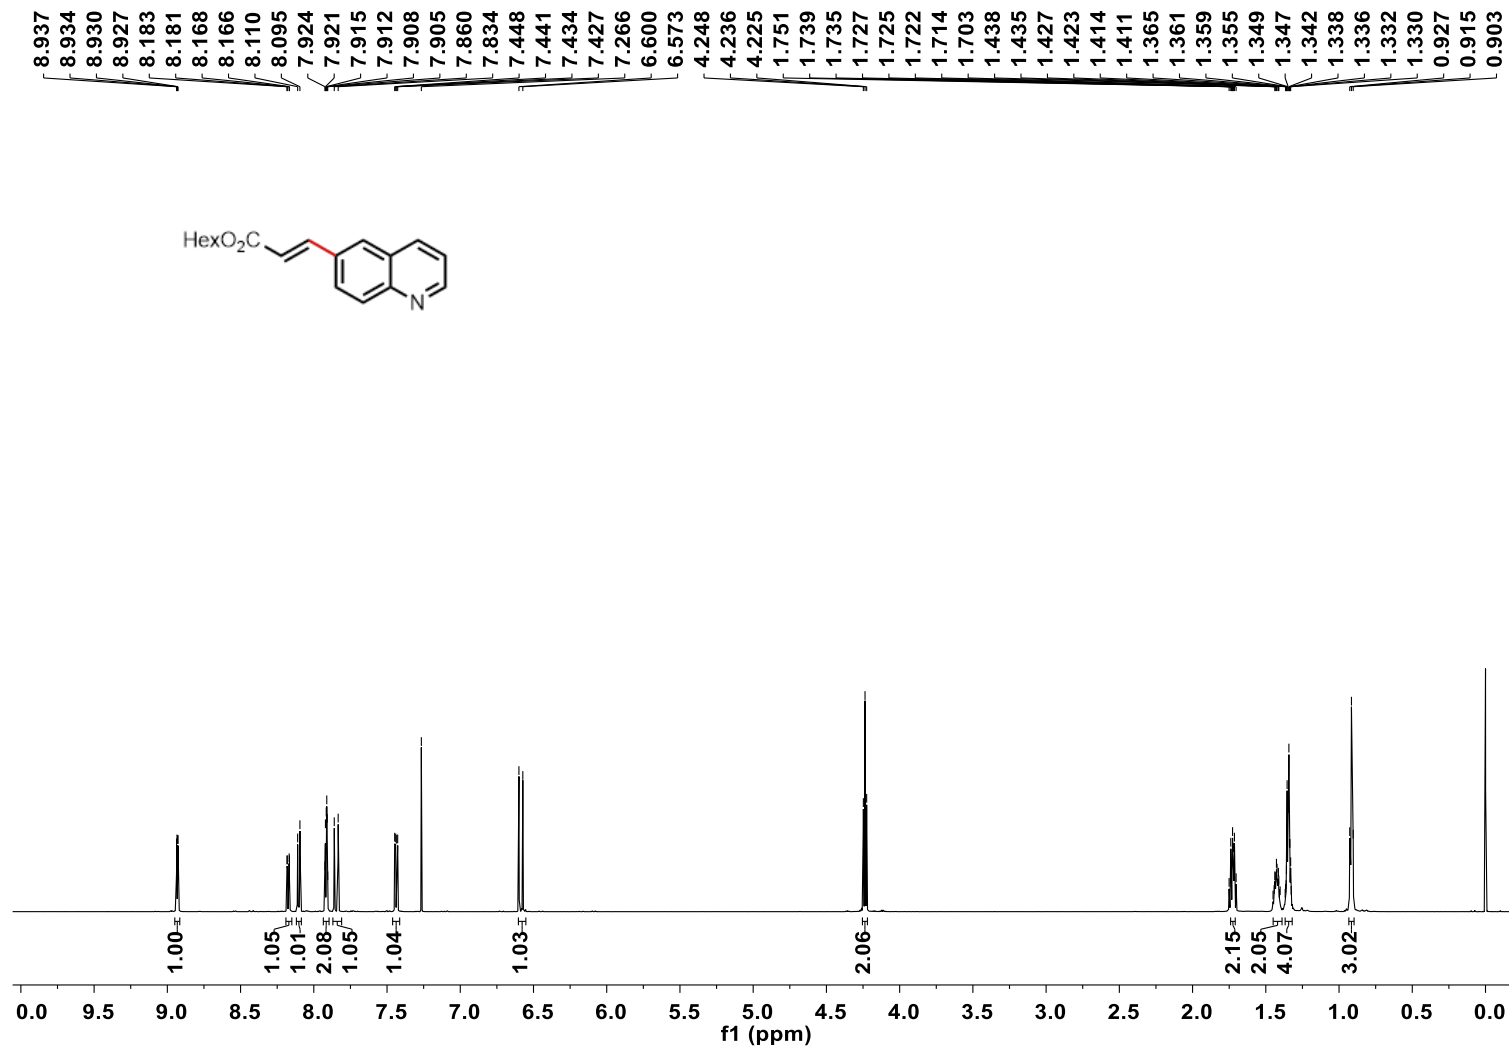

<sup>13</sup>C NMR (151 MHz, CDCl<sub>3</sub>) spectrum of 2aj

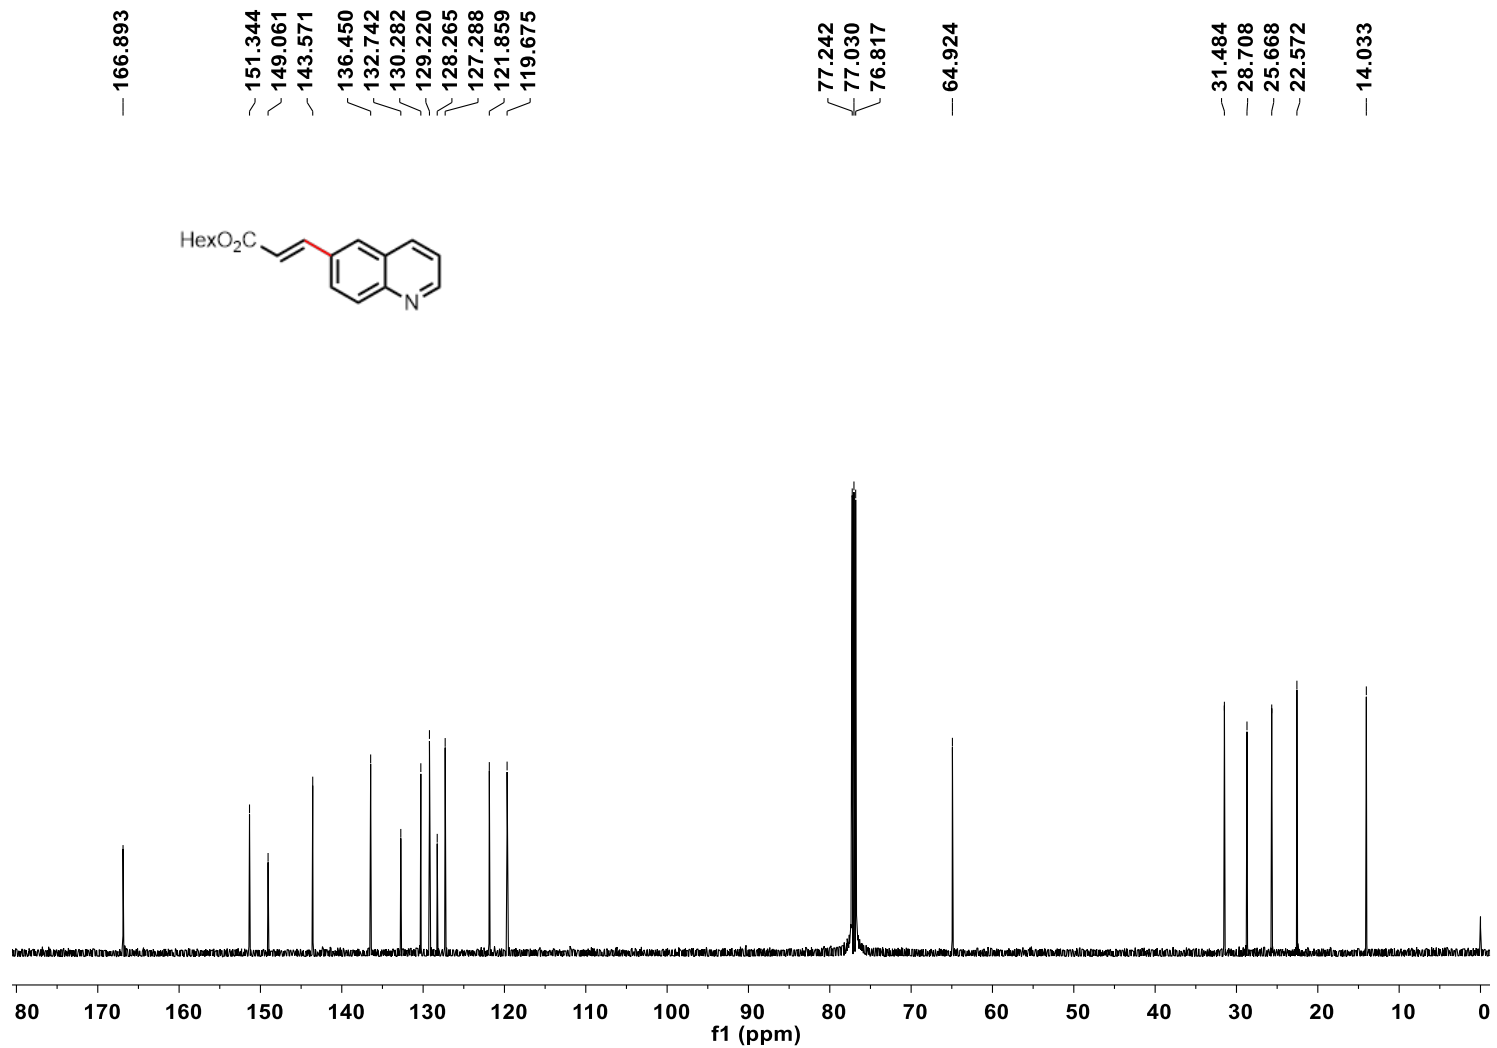

<sup>1</sup>H NMR (600 MHz, CDCl<sub>3</sub>) spectrum of **2ak**

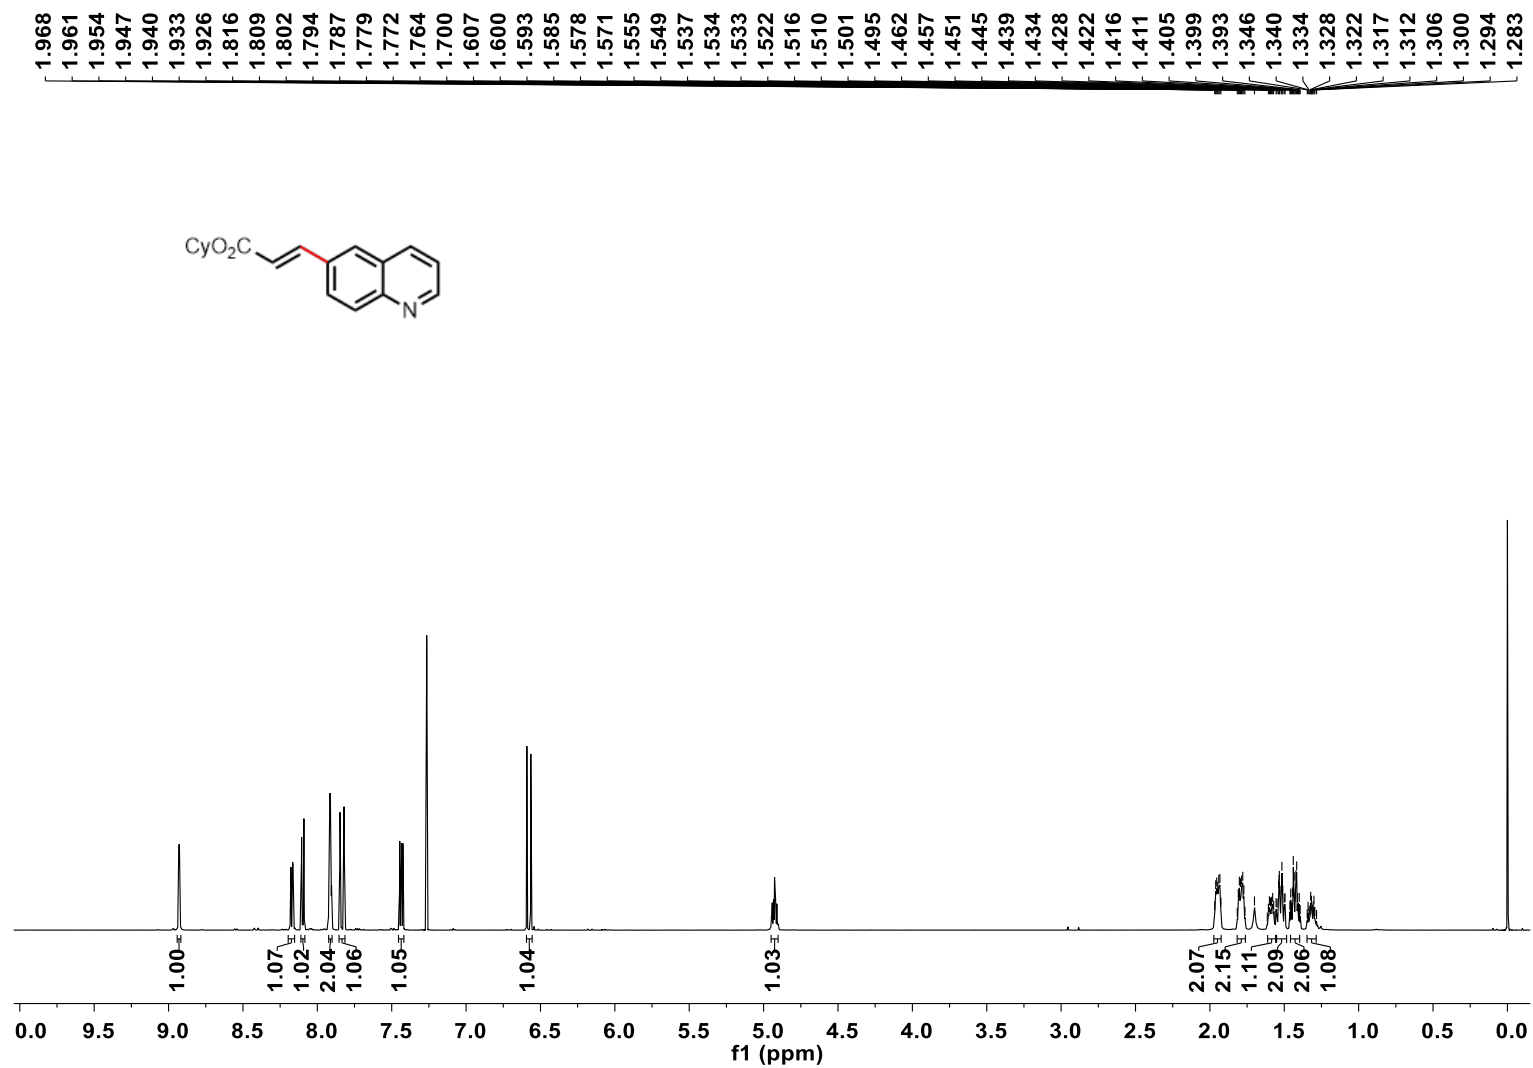



<sup>13</sup>C NMR (151 MHz, CDCl<sub>3</sub>) spectrum of **2ak**

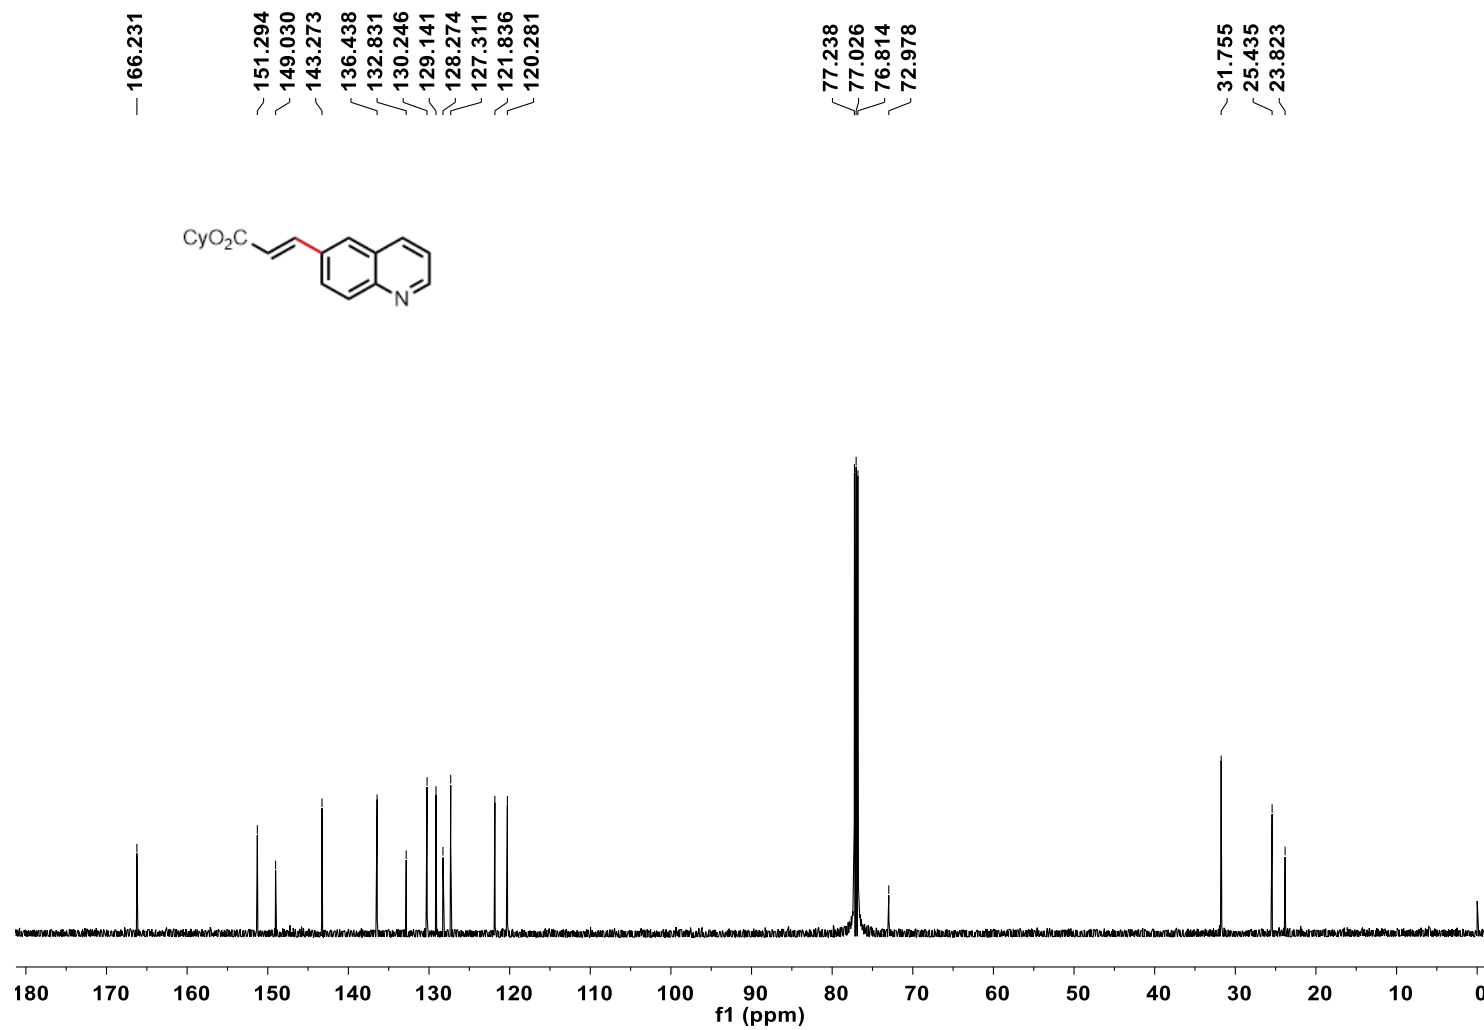

<sup>1</sup>H NMR (600 MHz, CDCl<sub>3</sub>) spectrum of **2al**

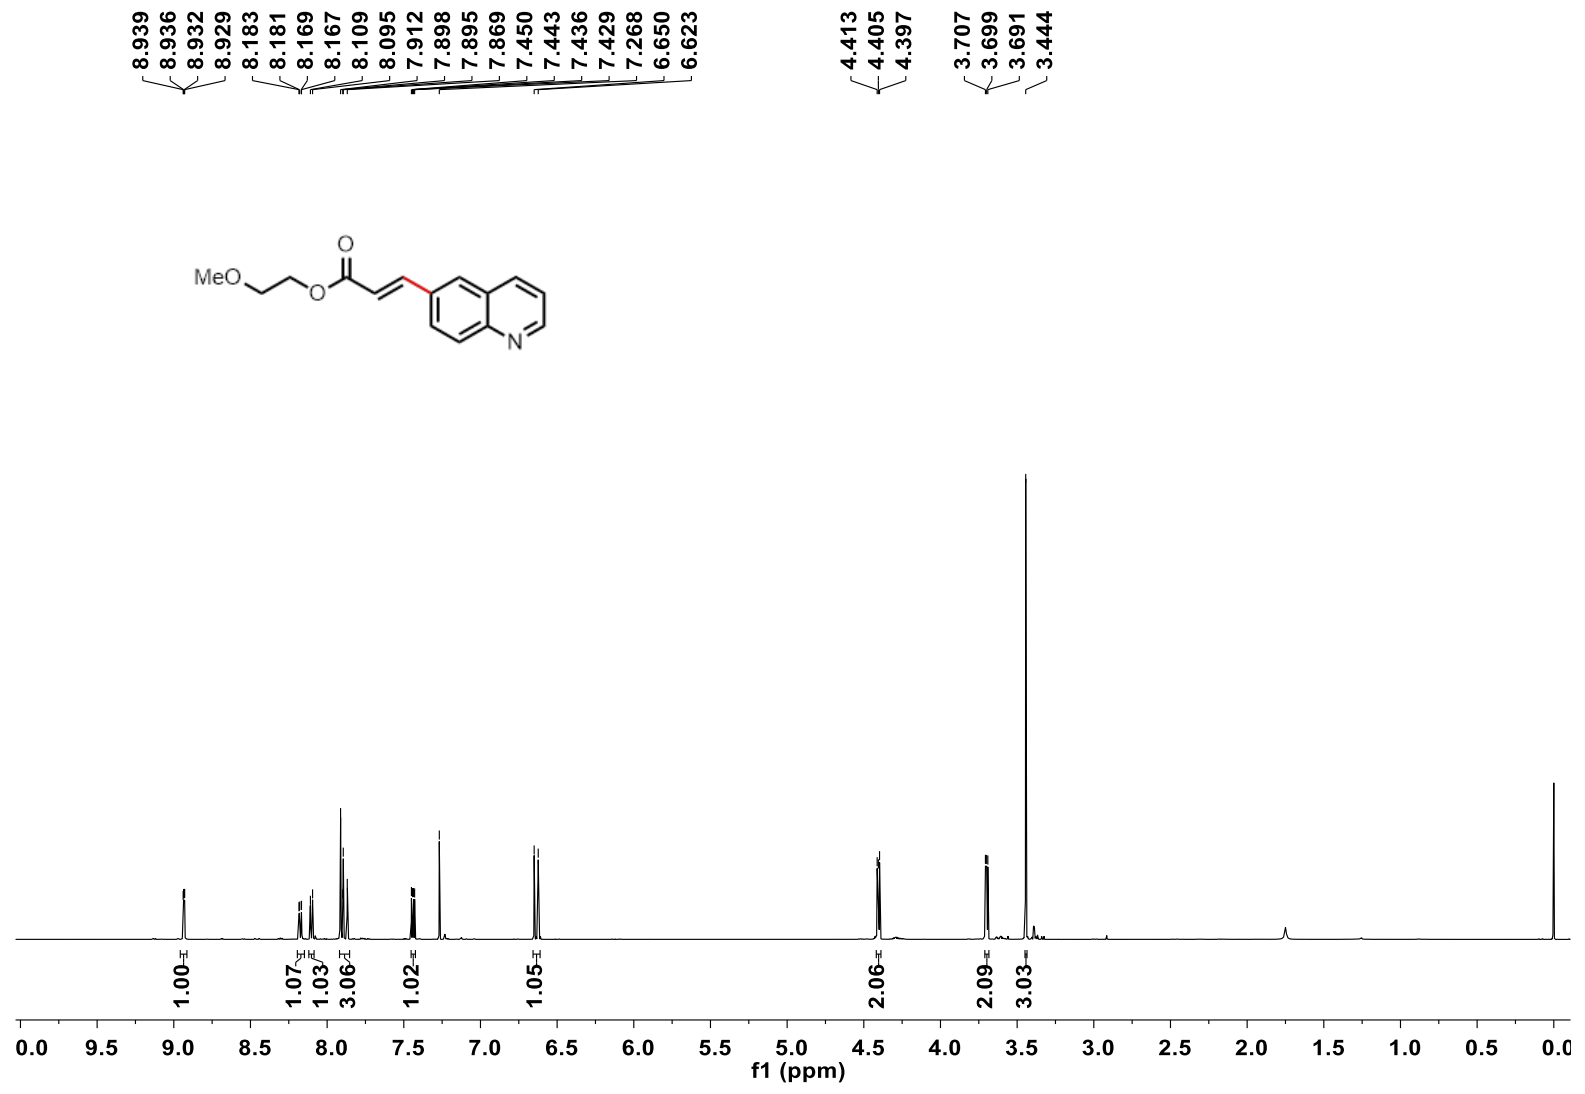

<sup>13</sup>C NMR (151 MHz, CDCl<sub>3</sub>) spectrum of **2al**

— 166.746  
— 151.399  
— 149.092  
— 144.151  
— 136.488  
— 132.633  
— 130.321  
— 129.374  
— 128.251  
— 127.255  
— 121.875  
— 119.187  
— 77.248  
— 77.035  
— 76.823  
— 70.568  
— 63.742  
— 59.079

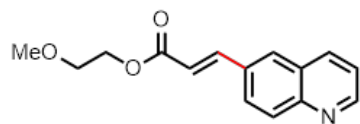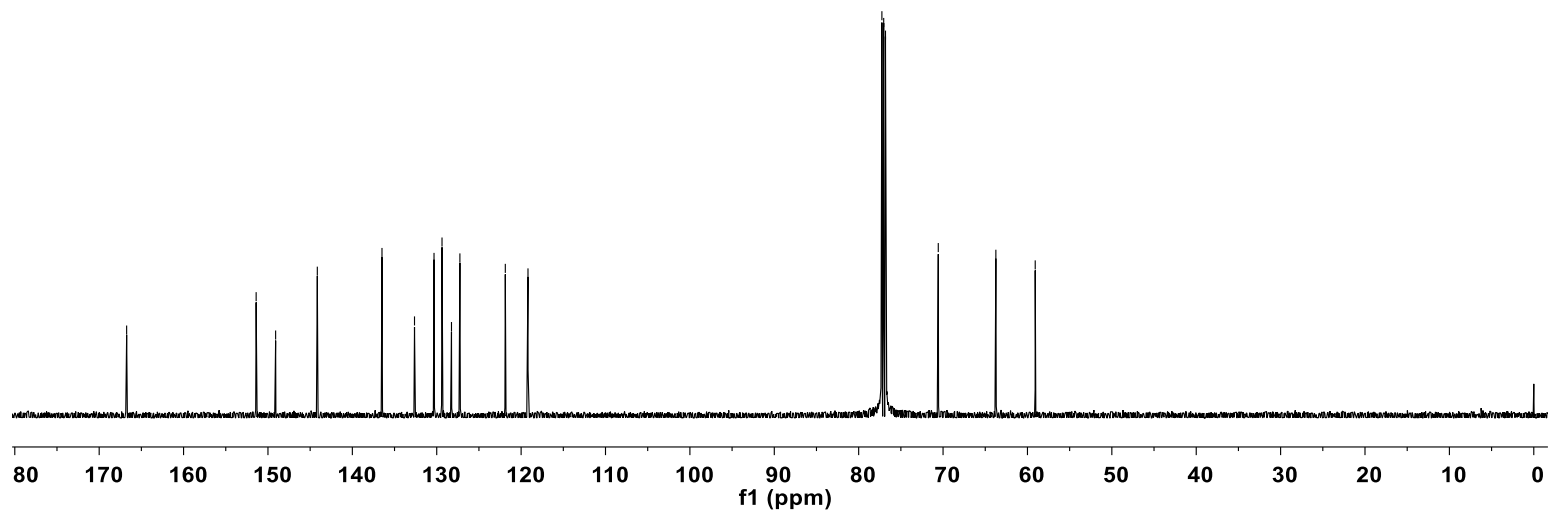

<sup>1</sup>H NMR (600 MHz, CDCl<sub>3</sub>) spectrum of **2am**

8.919  
8.917  
8.916  
8.912  
8.910  
8.909  
8.181  
8.167  
8.099  
8.085  
7.946  
7.943  
7.932  
7.928  
7.893  
7.853  
7.828  
7.439  
7.432  
7.425  
7.418  
7.267  
7.054  
7.028

3.227  
3.105

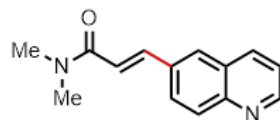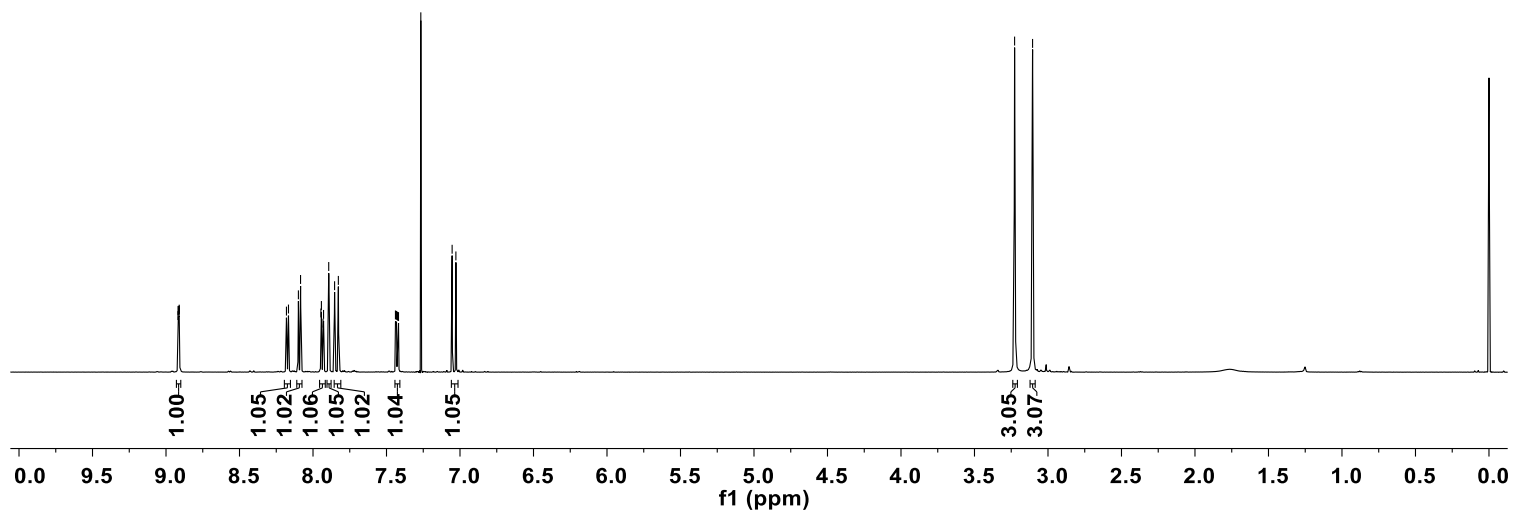

<sup>13</sup>C NMR (151 MHz, CDCl<sub>3</sub>) spectrum of **2am**

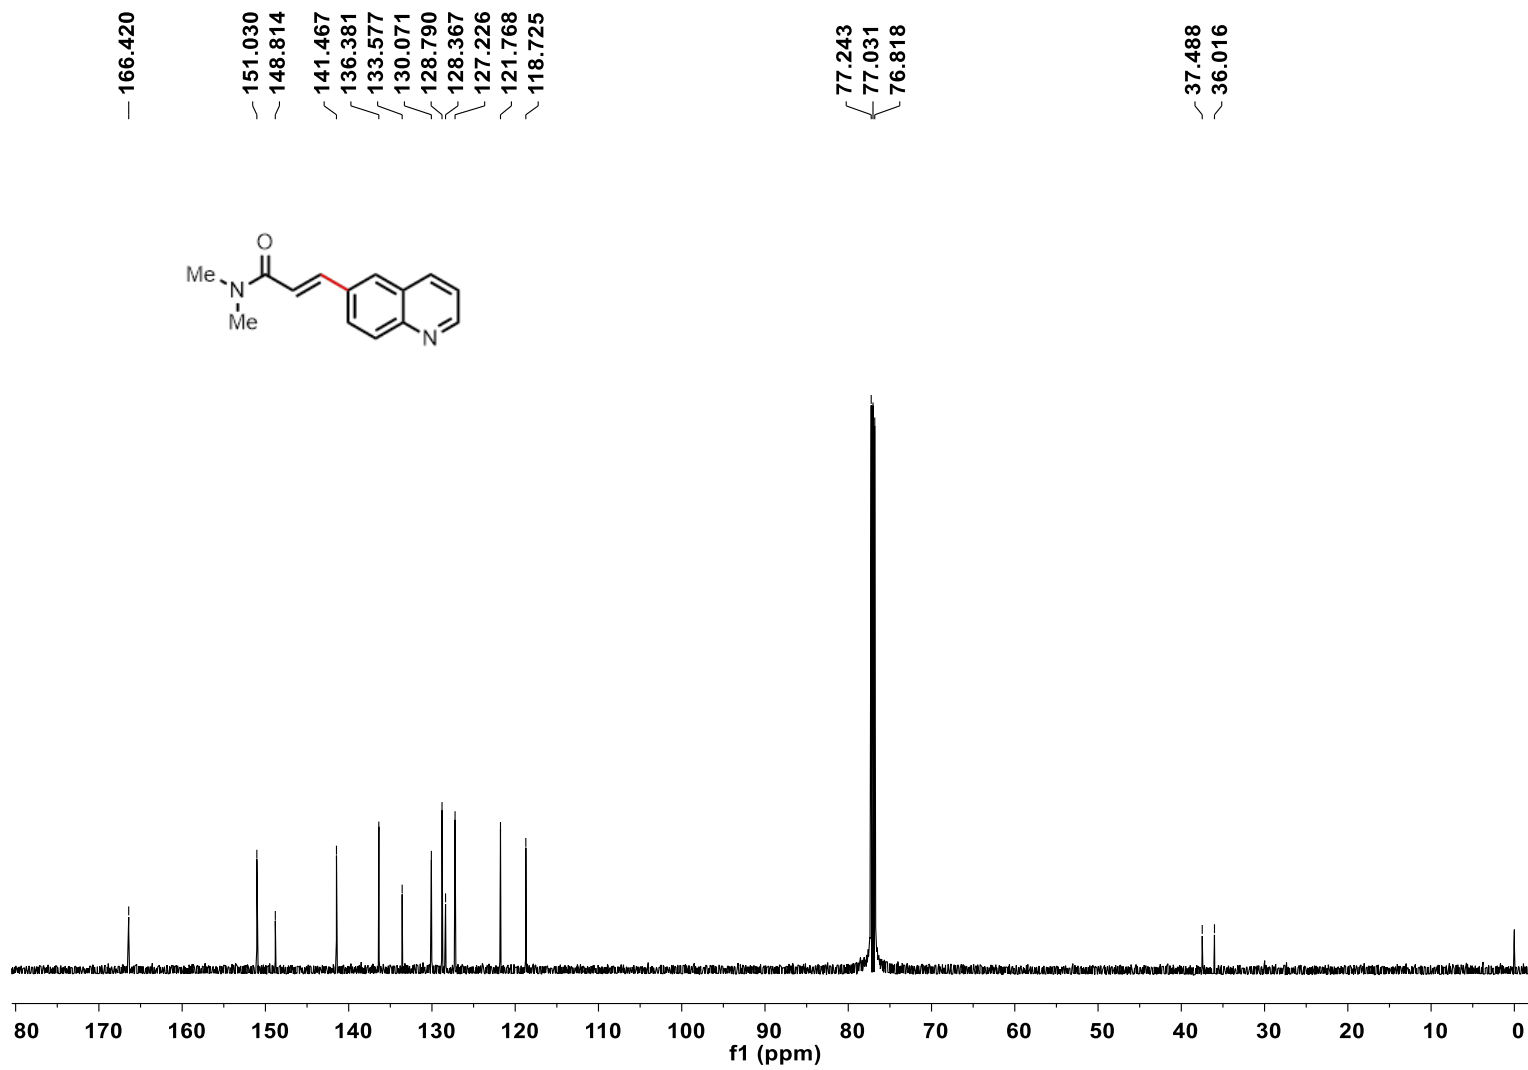

<sup>1</sup>H NMR (600 MHz, CDCl<sub>3</sub>) spectrum of **2an**

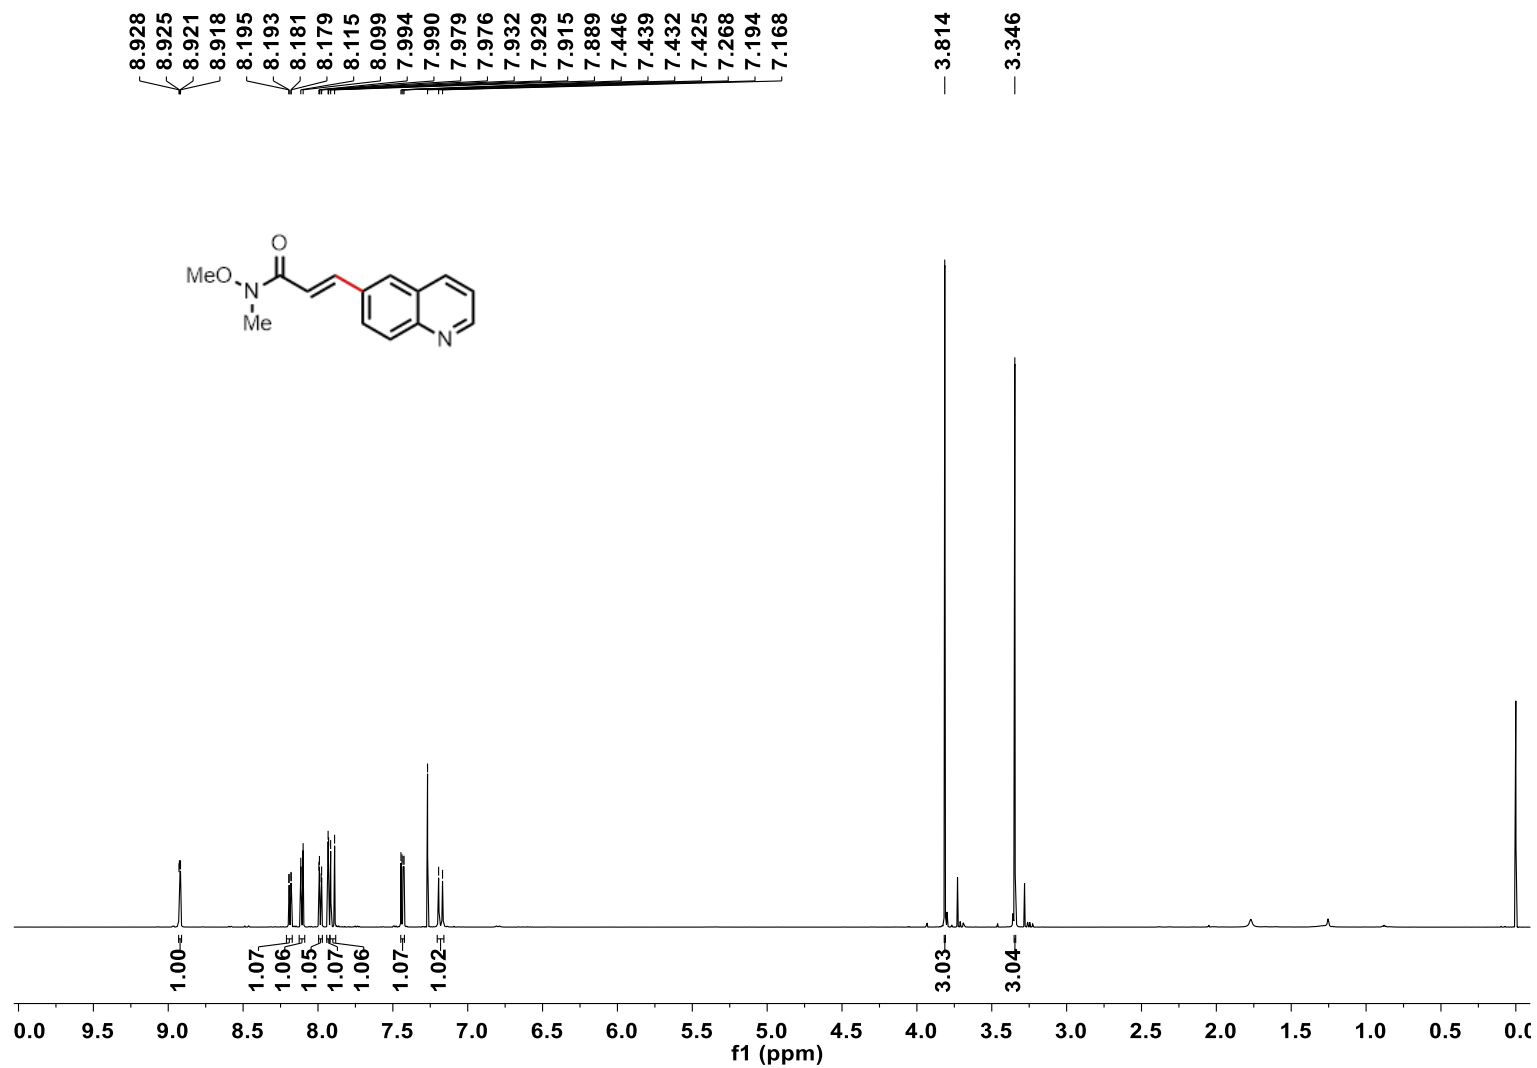

<sup>13</sup>C NMR (151 MHz, CDCl<sub>3</sub>) spectrum of **2an**

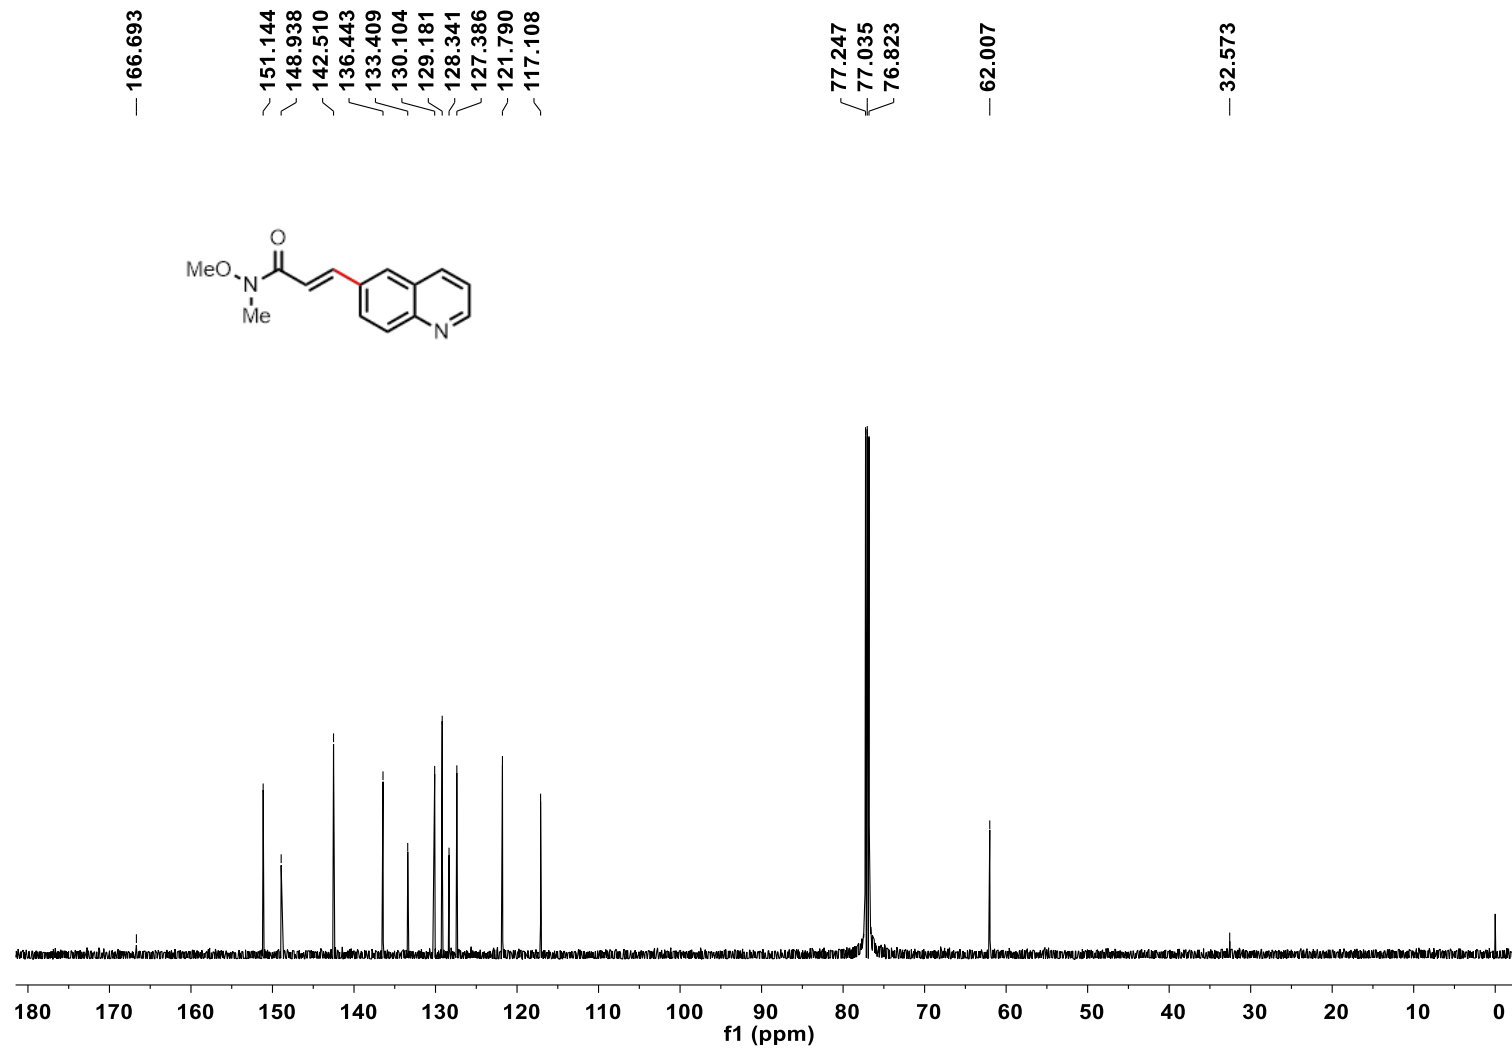

<sup>1</sup>H NMR (600 MHz, CDCl<sub>3</sub>) spectrum of **2ao**

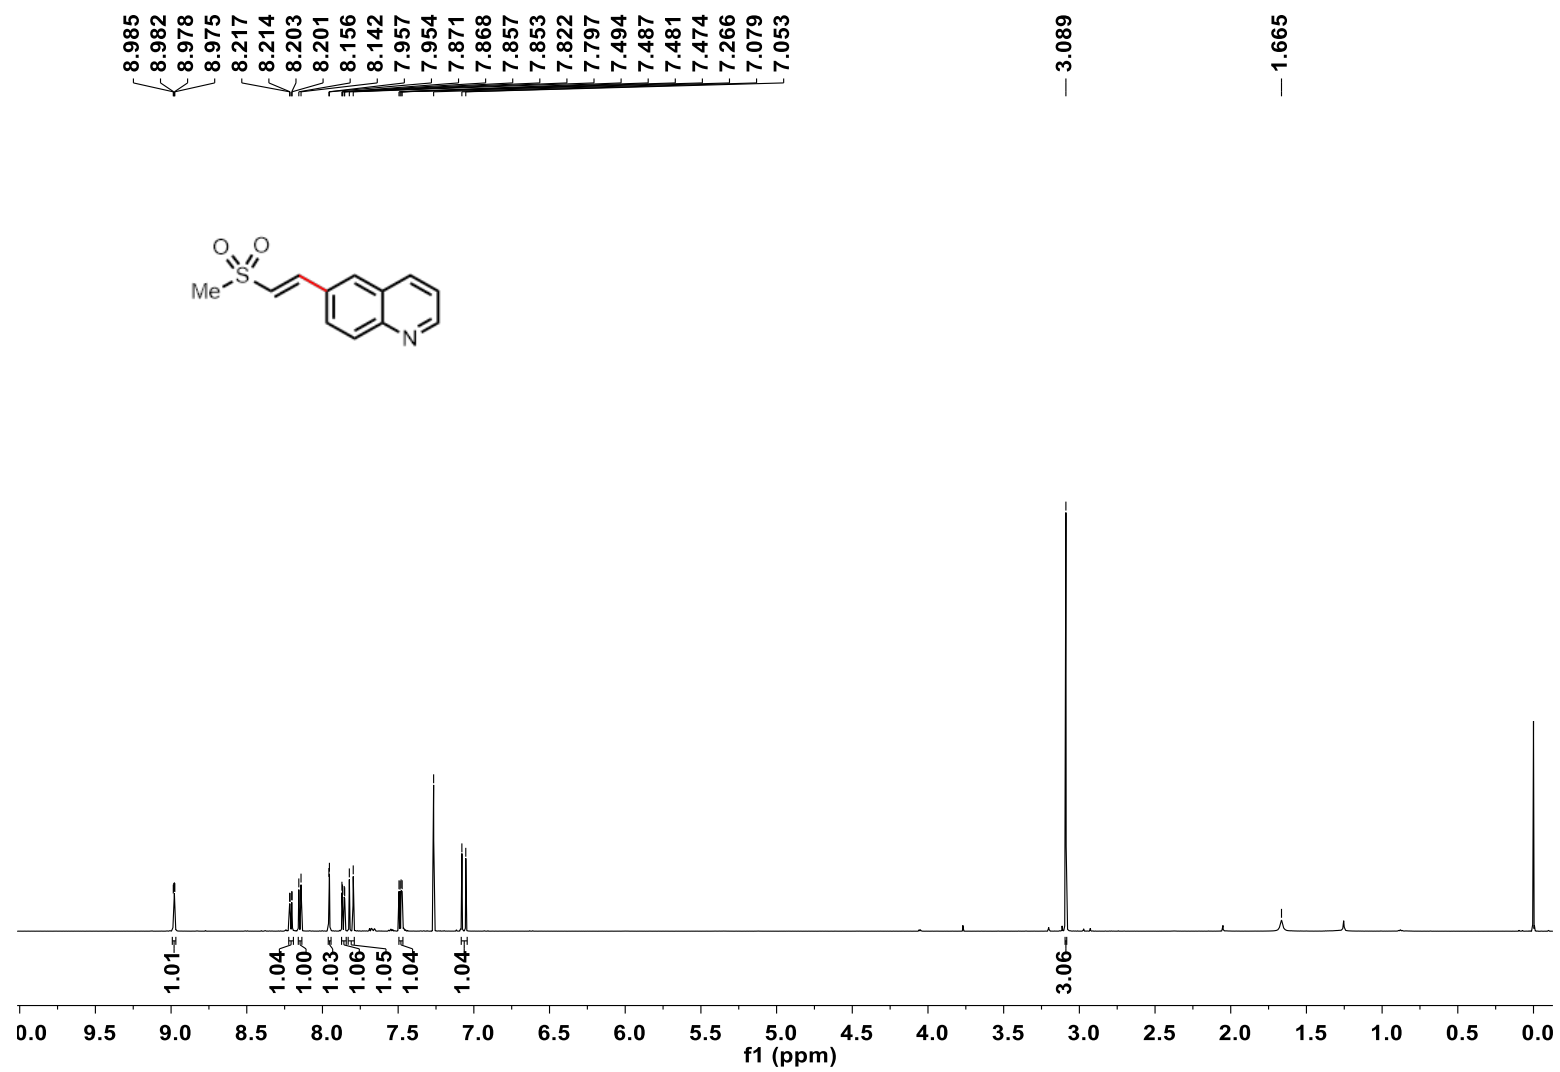



<sup>13</sup>C NMR (151 MHz, CDCl<sub>3</sub>) spectrum of **2ao**

152.038  
149.365  
143.109  
136.641  
130.768  
130.556  
130.291  
128.186  
127.410  
127.042  
122.203

77.241  
77.028  
76.816

43.319

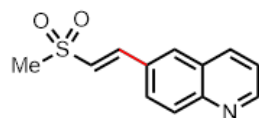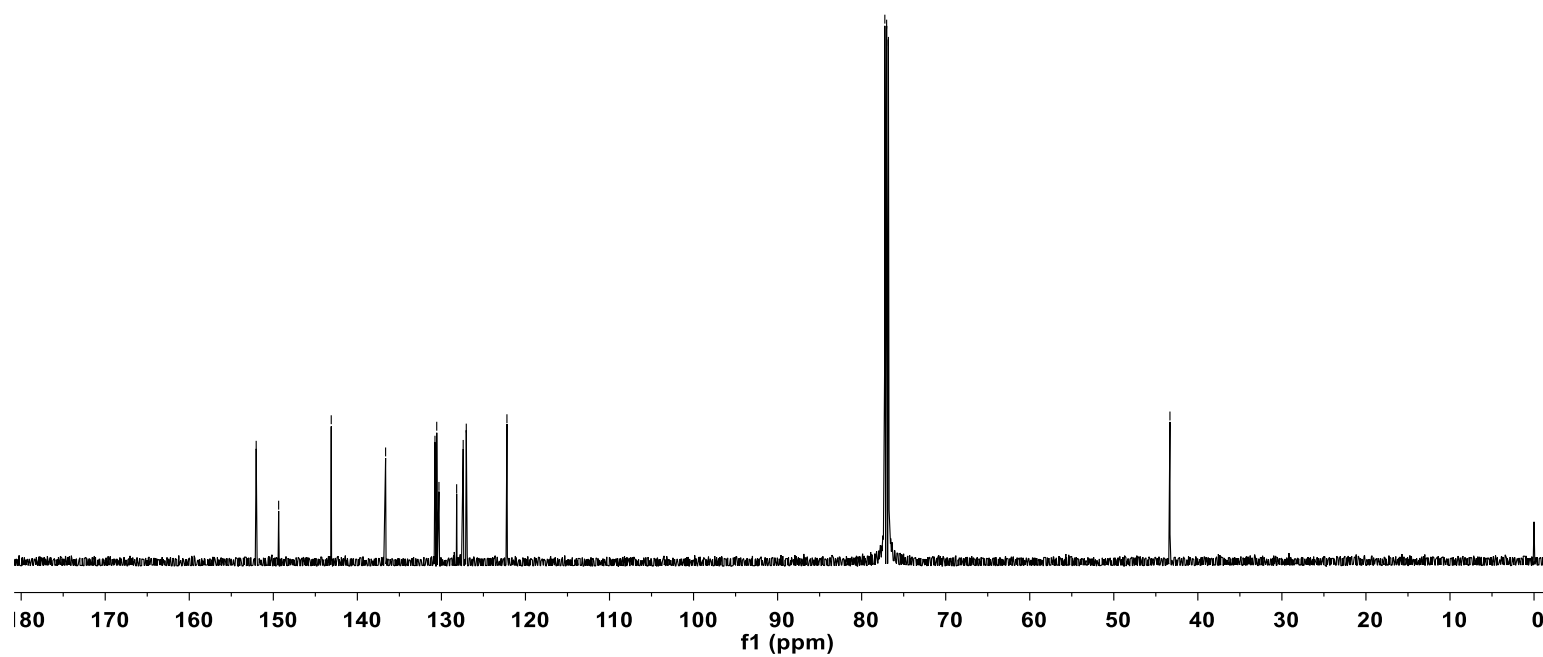

<sup>1</sup>H NMR (600 MHz, CDCl<sub>3</sub>) spectrum of **2ap**

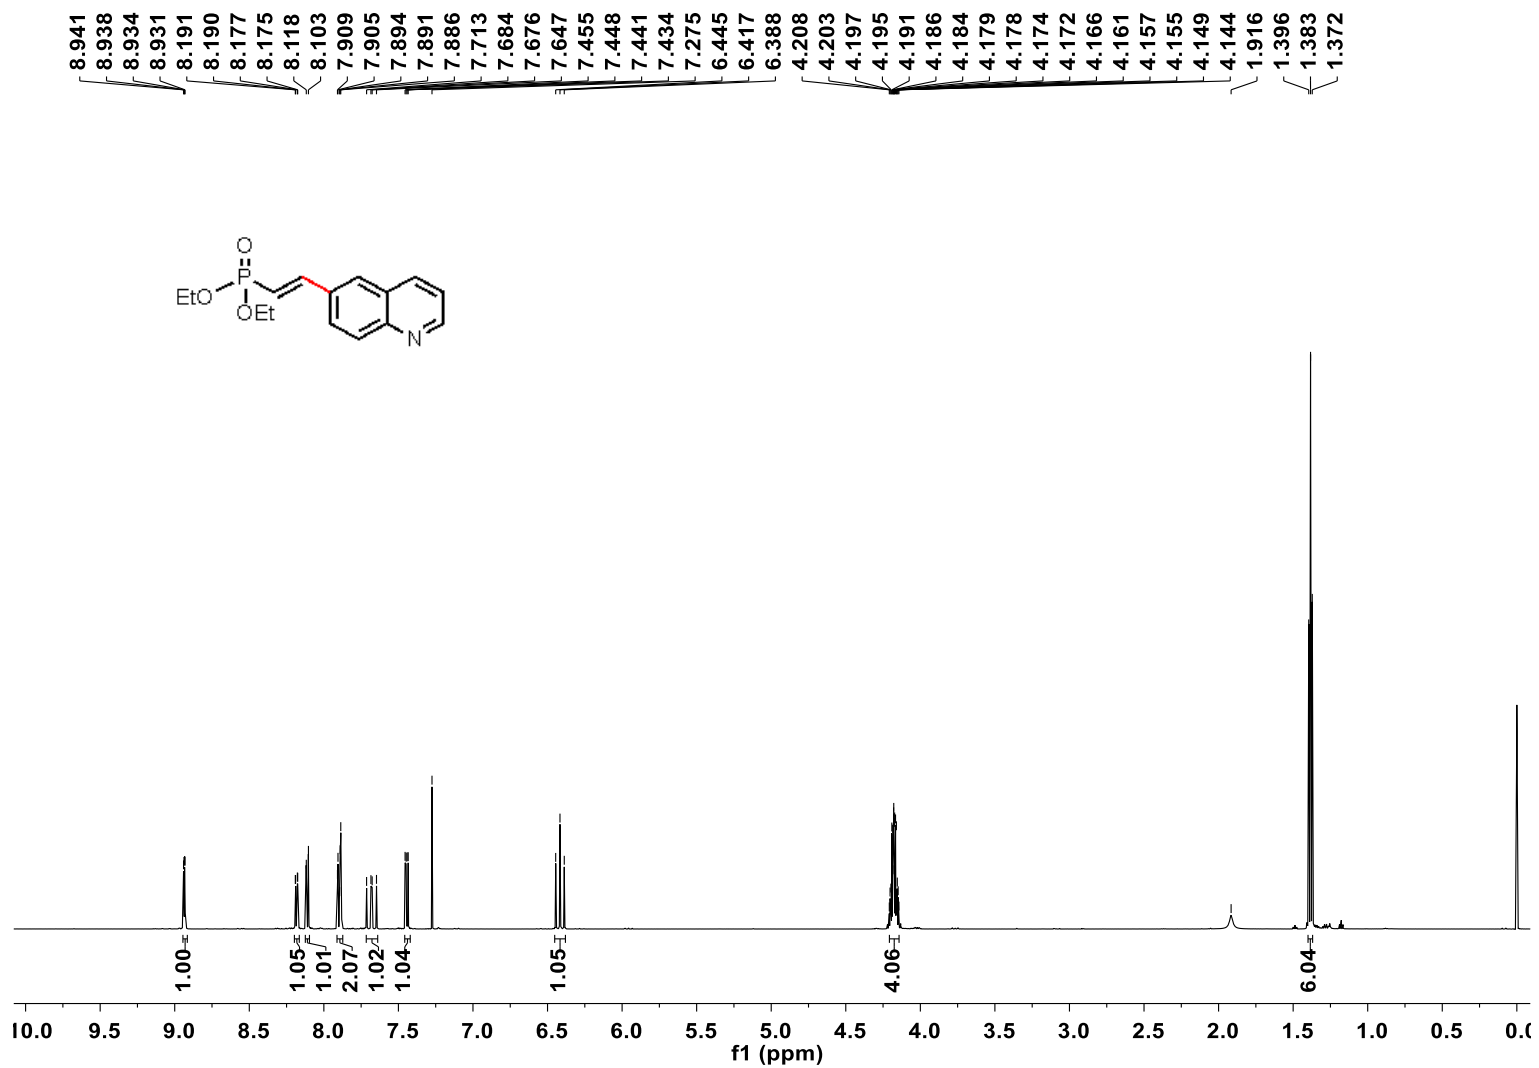

<sup>13</sup>C NMR (151 MHz, CDCl<sub>3</sub>) spectrum of **2ap**

151.389  
149.032  
147.727  
147.682  
136.539  
133.128  
132.972  
130.263  
128.898  
128.890  
128.221  
128.211  
126.938  
121.889  
116.288  
115.022

77.260  
77.046  
76.835

62.014  
61.977

16.472  
16.428

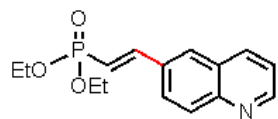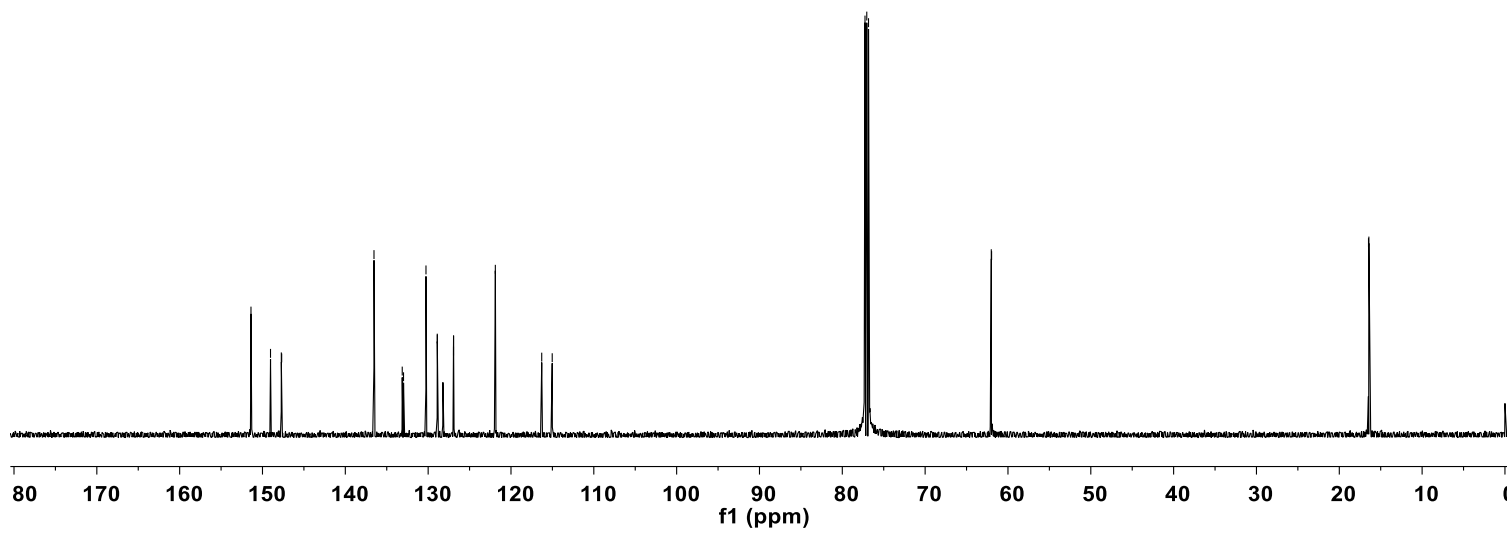

<sup>1</sup>H NMR (600 MHz, CDCl<sub>3</sub>) spectrum of **2aq**

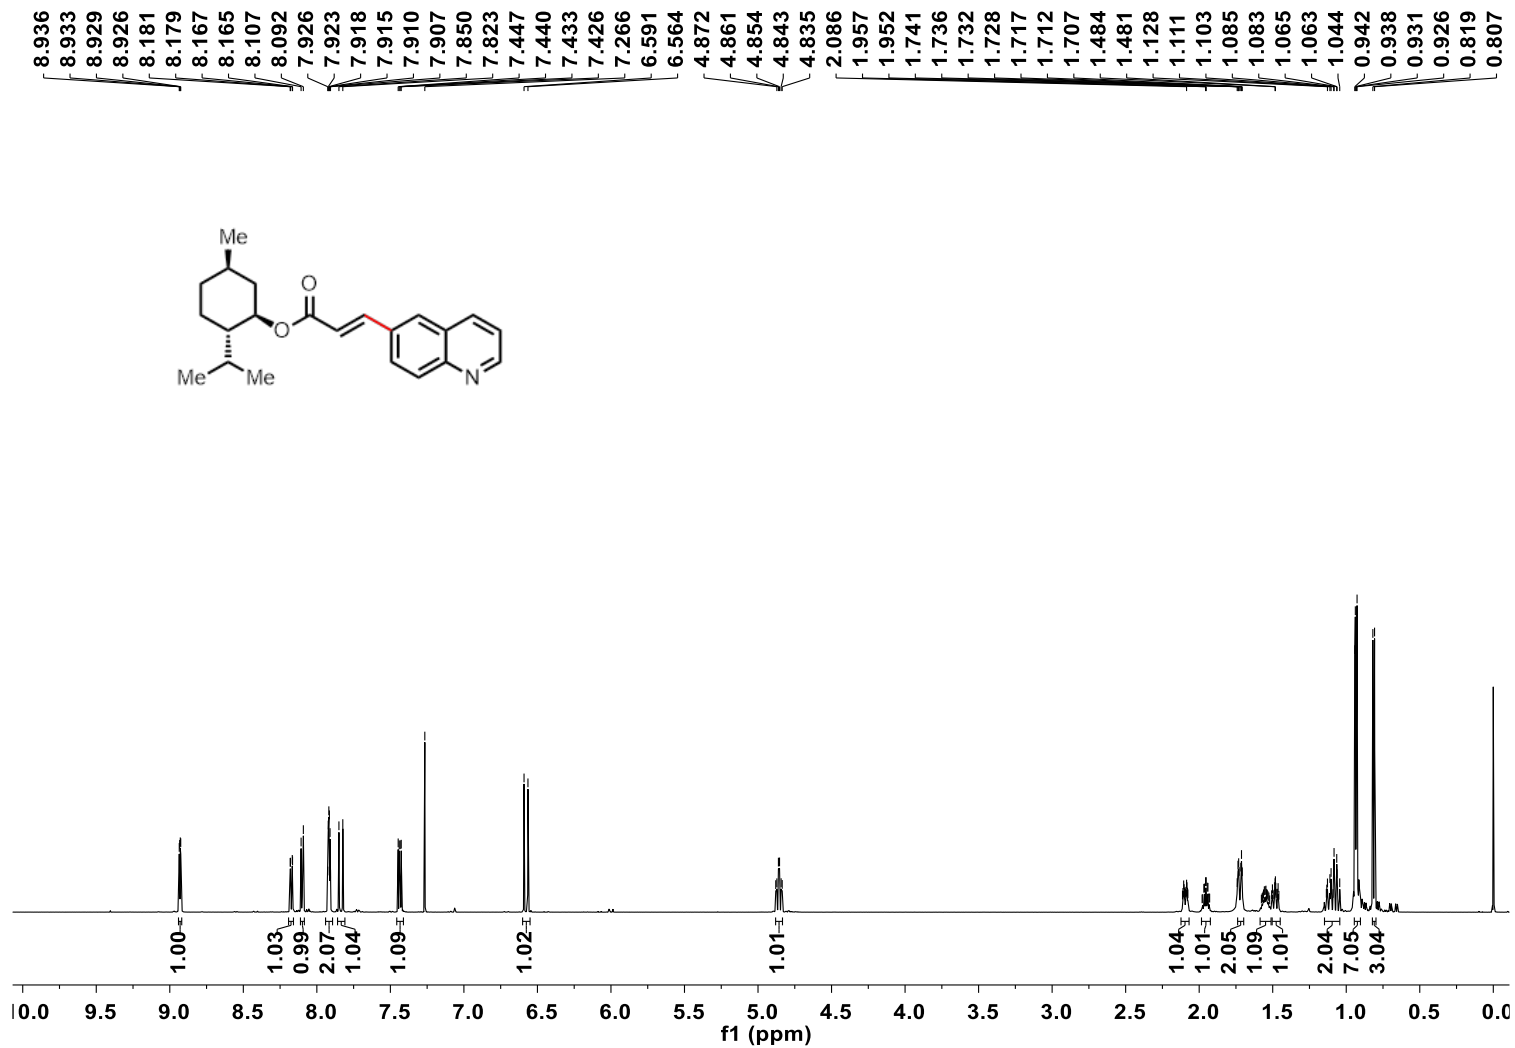

<sup>13</sup>C NMR (151 MHz, CDCl<sub>3</sub>) spectrum of **2aq**

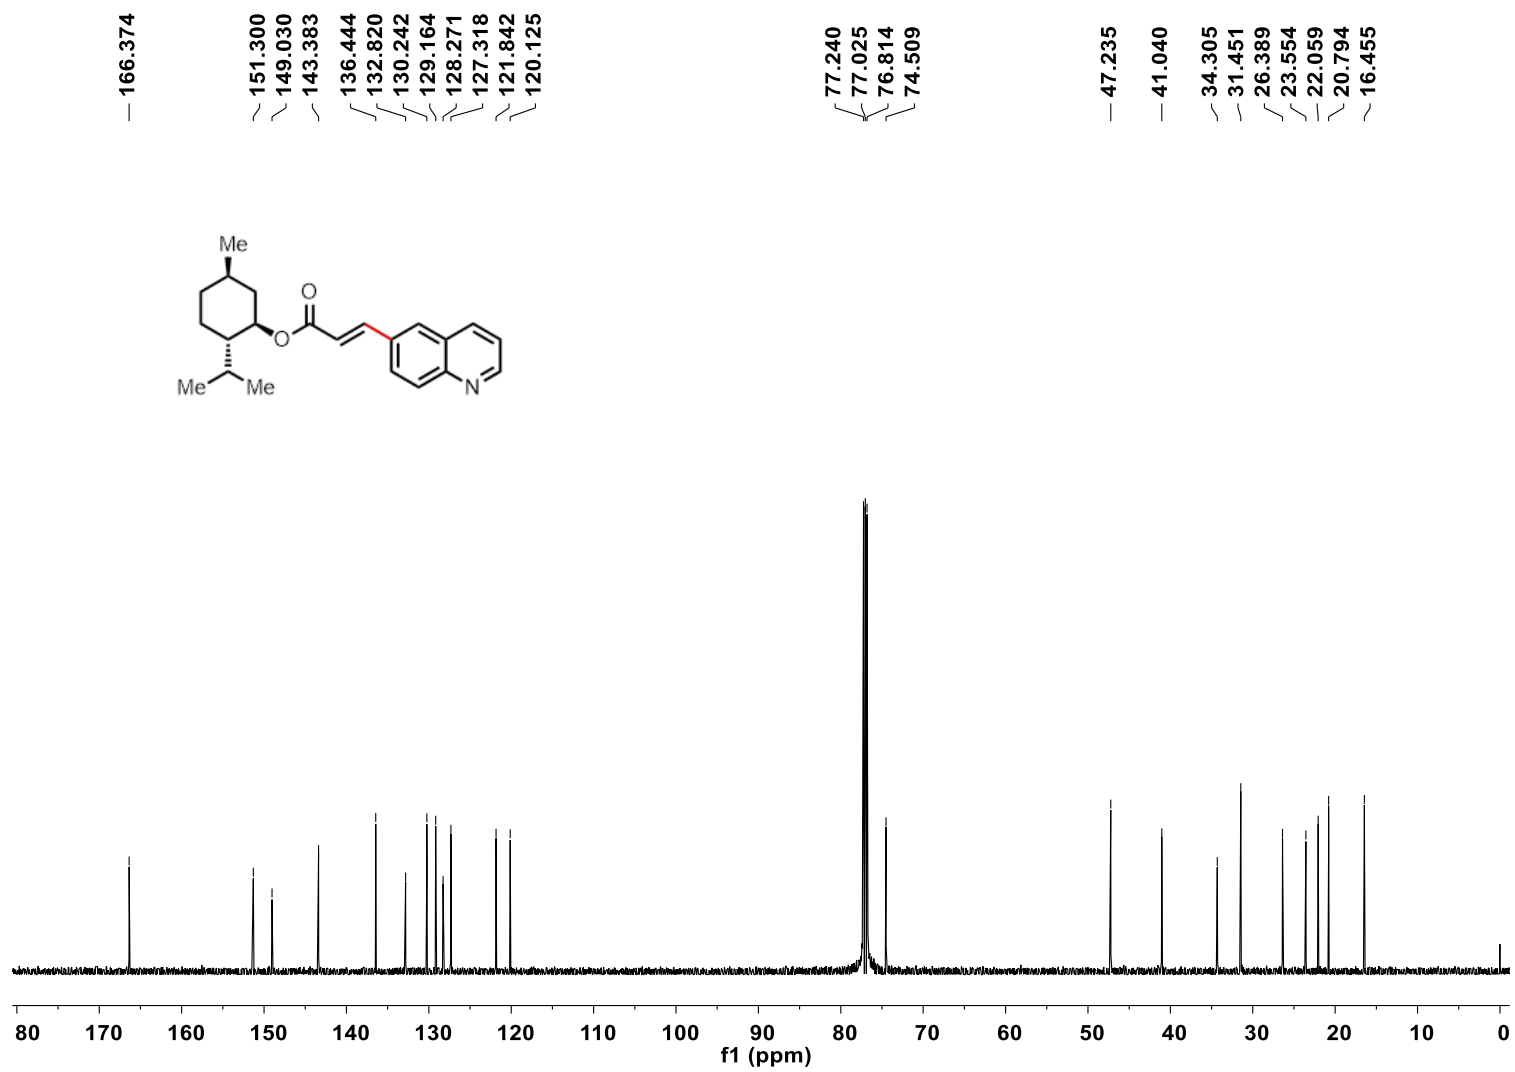

<sup>1</sup>H NMR (600 MHz, CDCl<sub>3</sub>) spectrum of **2ar**

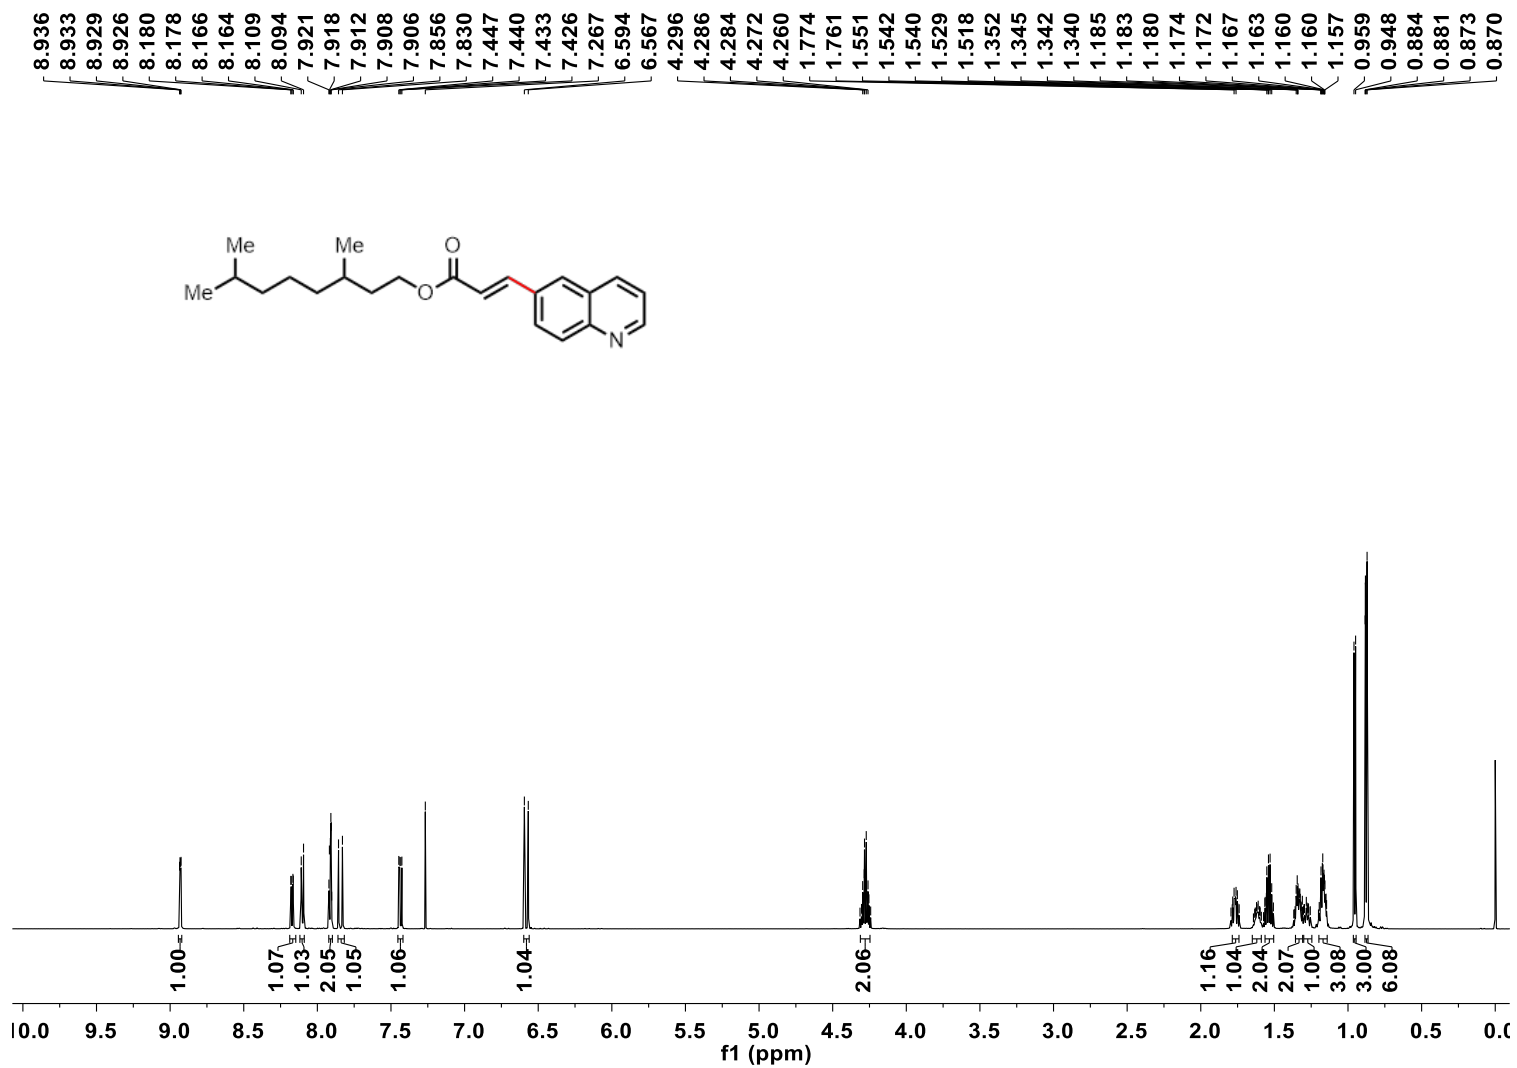

<sup>13</sup>C NMR (151 MHz, CDCl<sub>3</sub>) spectrum of **2ar**

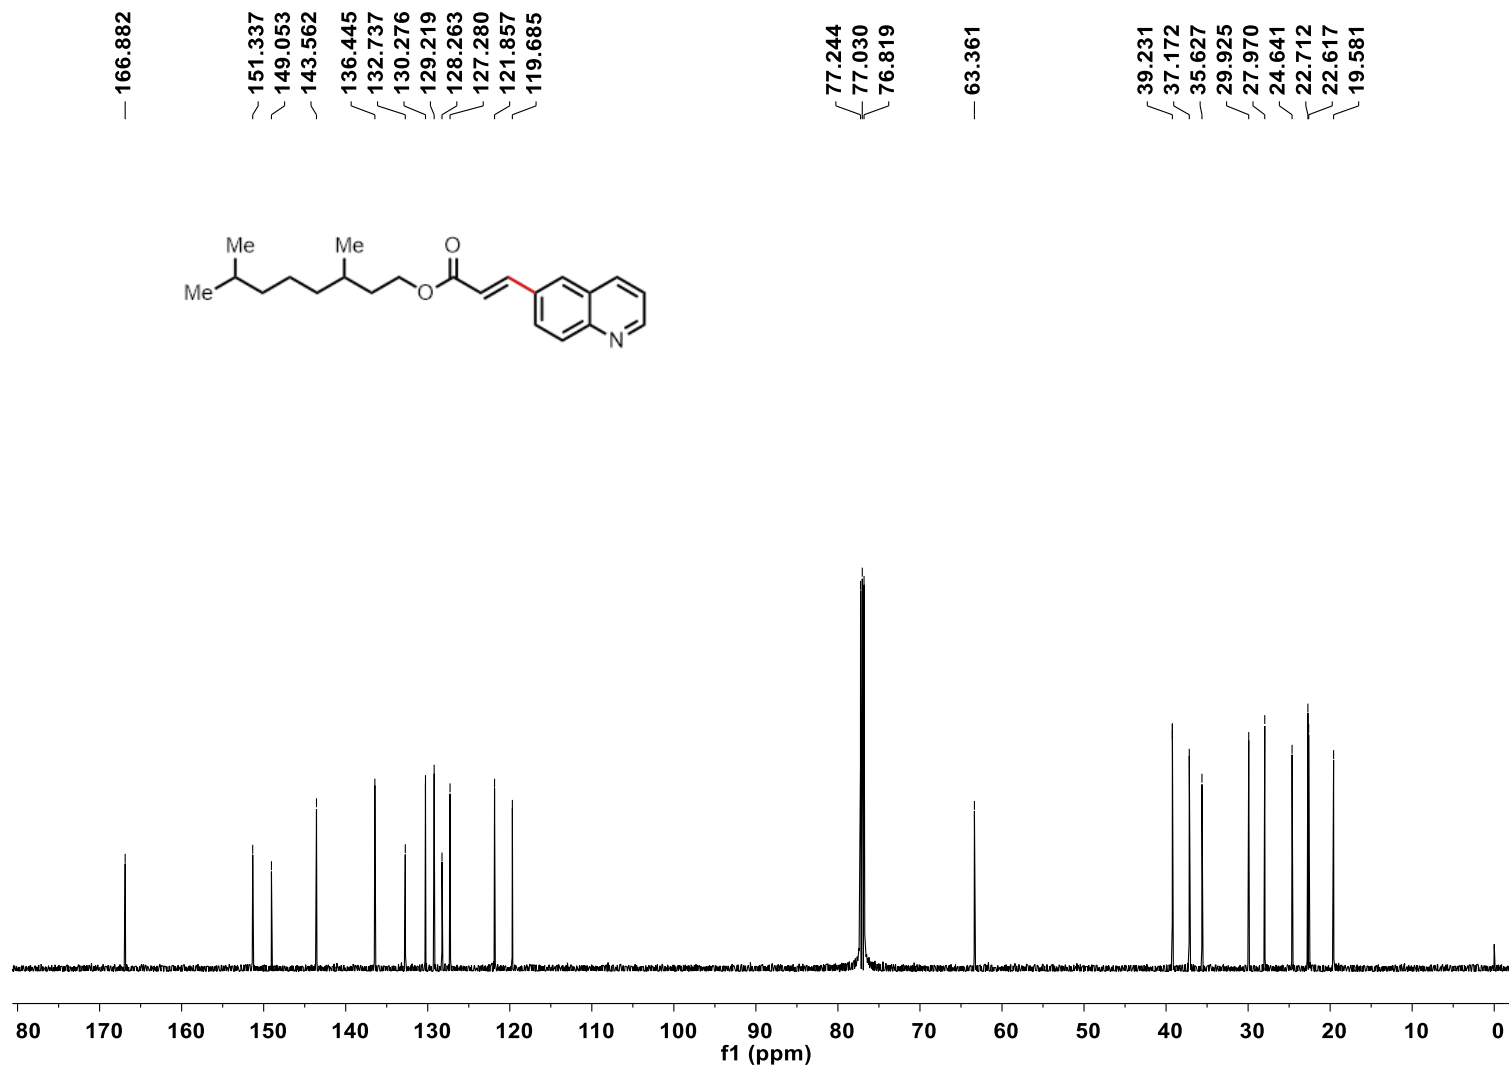

<sup>1</sup>H NMR (600 MHz, CDCl<sub>3</sub>) spectrum of **2as**

8.914  
8.911  
8.907  
8.904  
8.177  
8.175  
8.162  
8.160  
8.126  
8.111  
7.979  
7.976  
7.964  
7.961  
7.866  
7.863  
7.615  
7.587  
7.438  
7.431  
7.424  
7.417  
7.263  
7.143  
7.115

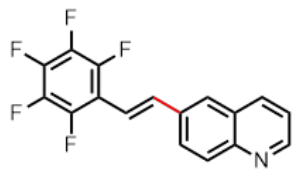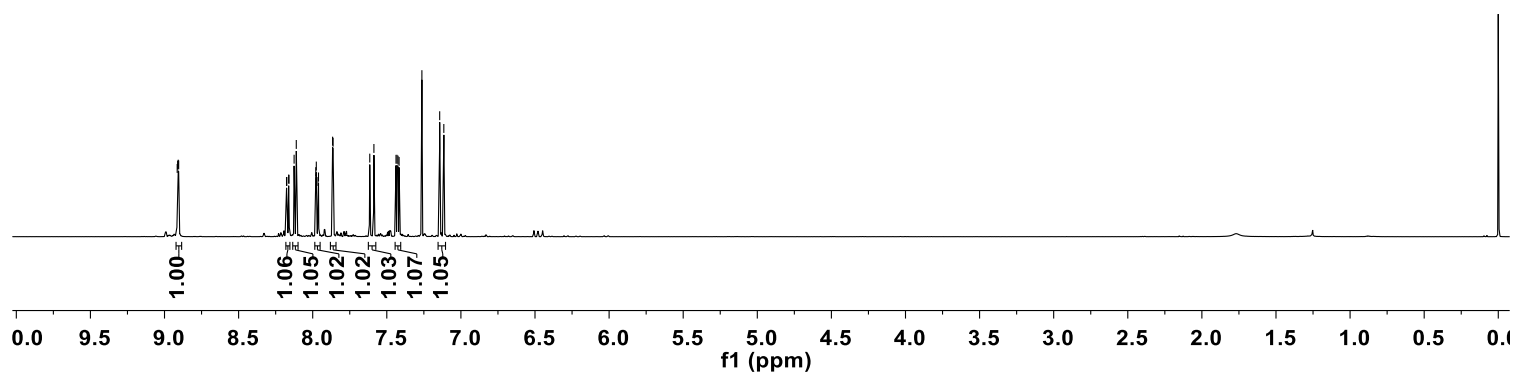



<sup>13</sup>C NMR (151 MHz, CDCl<sub>3</sub>) spectrum of **2as**

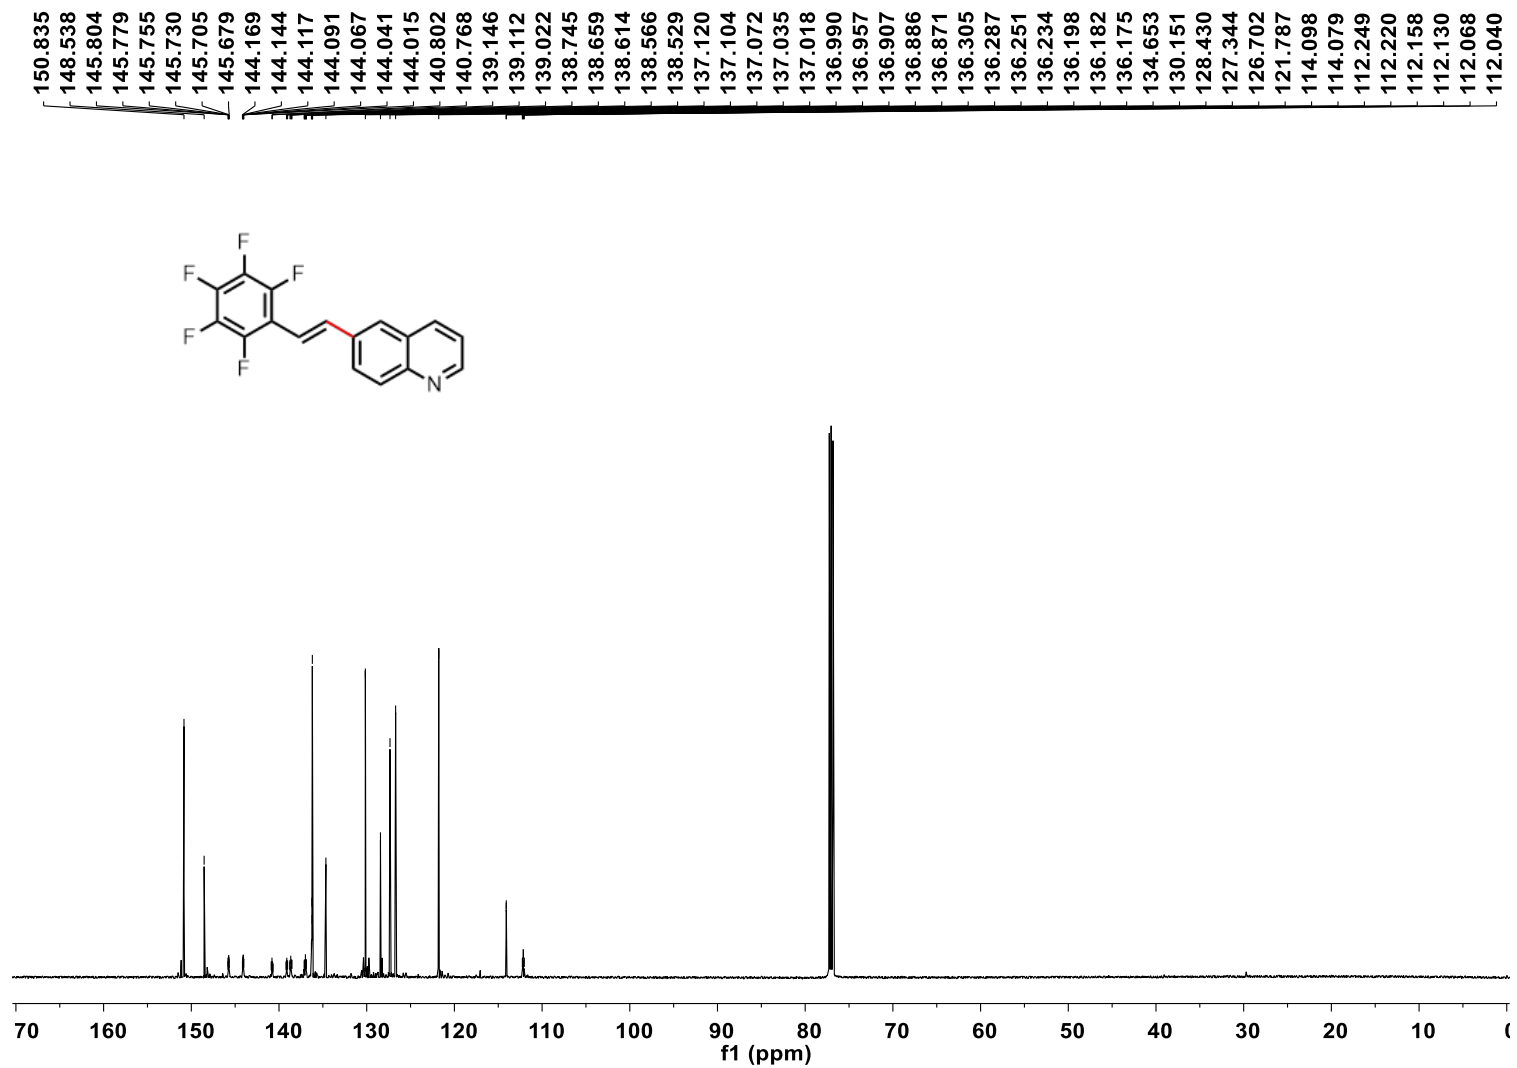

$^{19}\text{F}$  NMR (376 MHz,  $\text{CDCl}_3$ ) spectrum of **2as**

-145.054  
-145.077  
-145.111  
-145.134

-158.362  
-158.418  
-158.474

-165.218  
-165.241  
-165.278  
-165.301  
-165.337  
-165.356

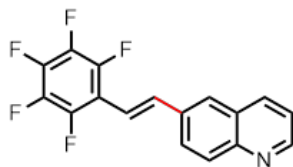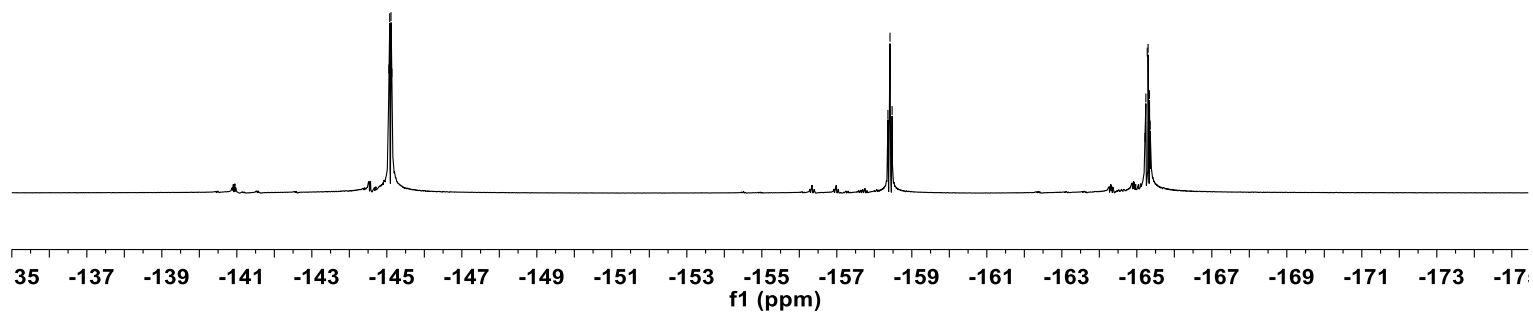

<sup>1</sup>H NMR (600 MHz, CDCl<sub>3</sub>) spectrum of **2at**

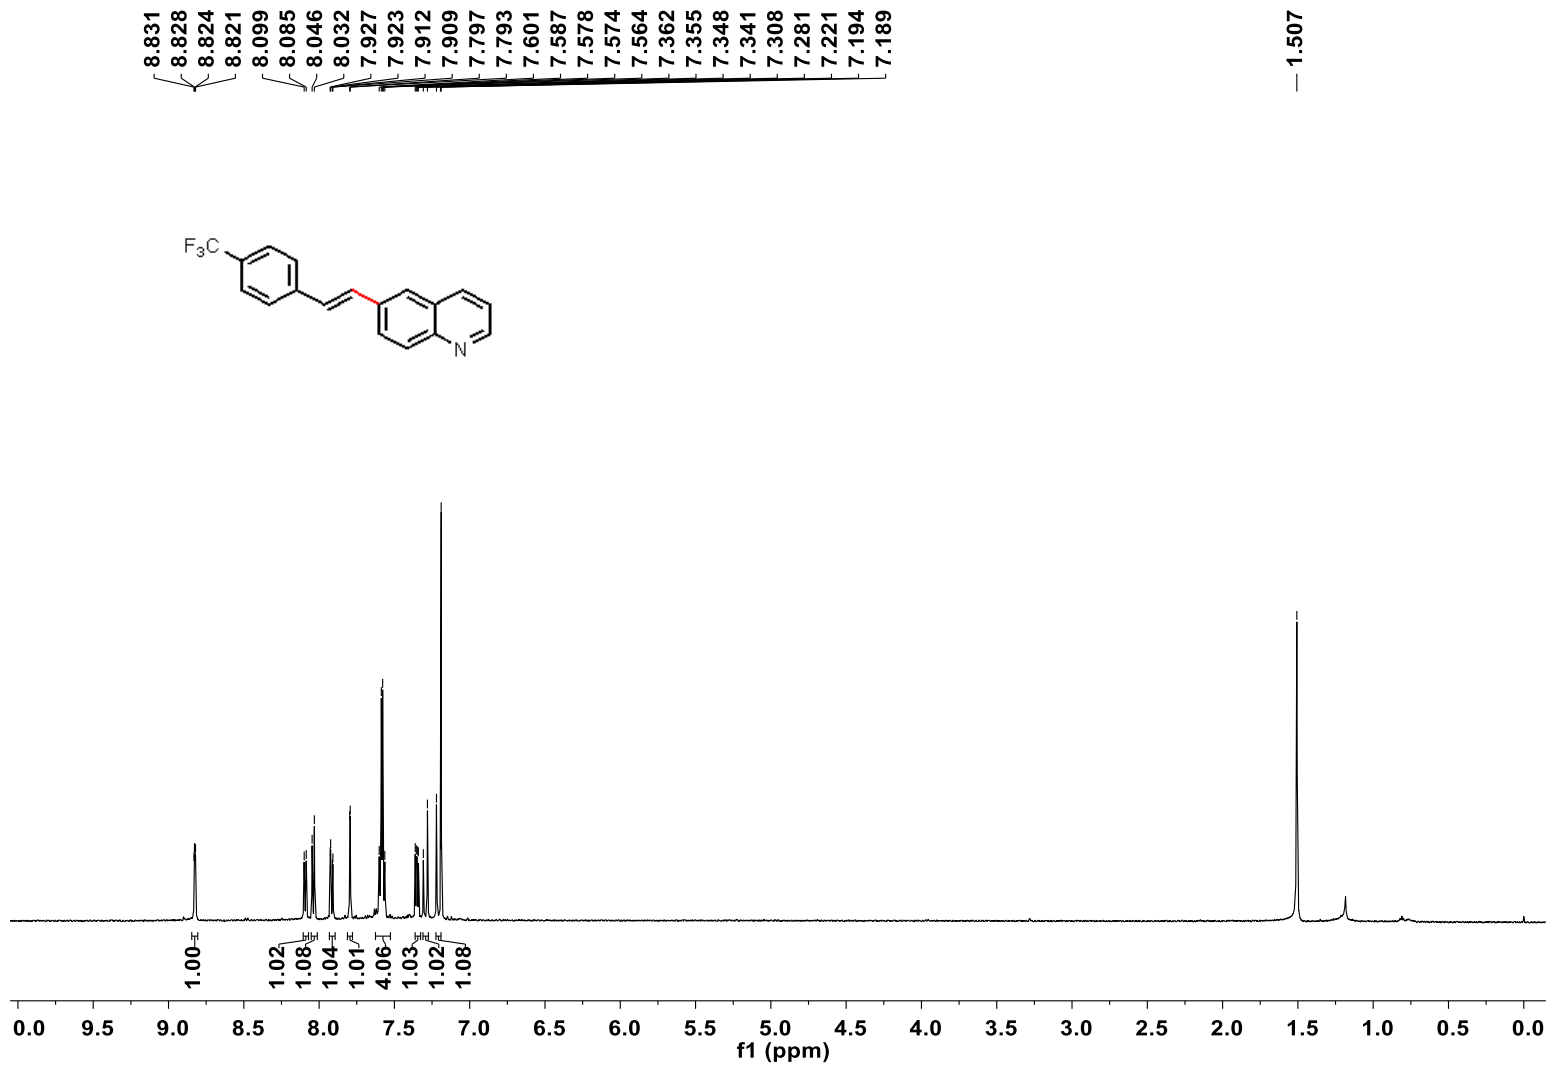

<sup>13</sup>C NMR (151 MHz, CDCl<sub>3</sub>) spectrum of **2at**

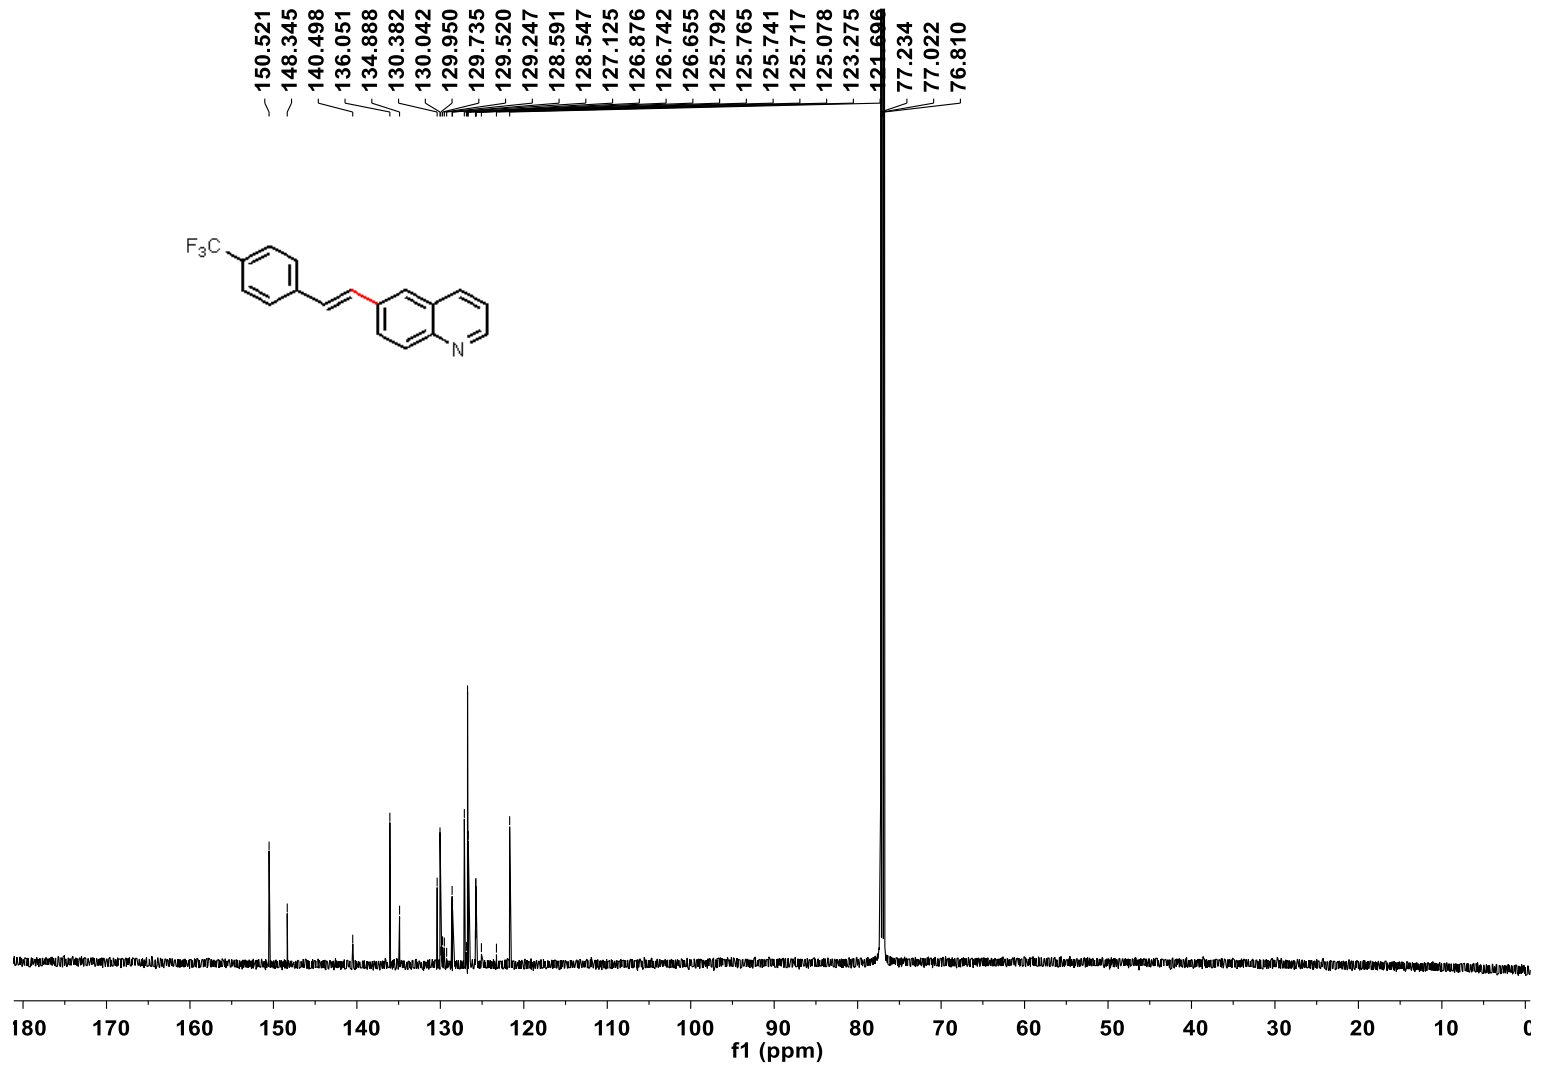

$^{19}\text{F}$  NMR (376 MHz,  $\text{CDCl}_3$ ) spectrum of **2at**

-65.152

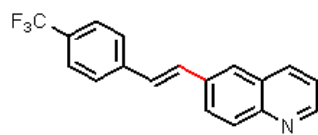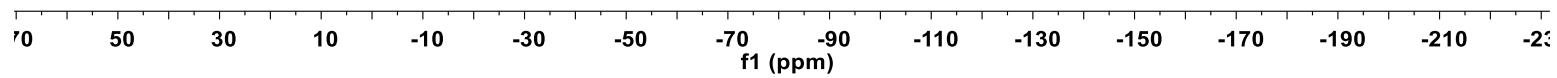

<sup>1</sup>H NMR (600 MHz, CDCl<sub>3</sub>) spectrum of **2au**

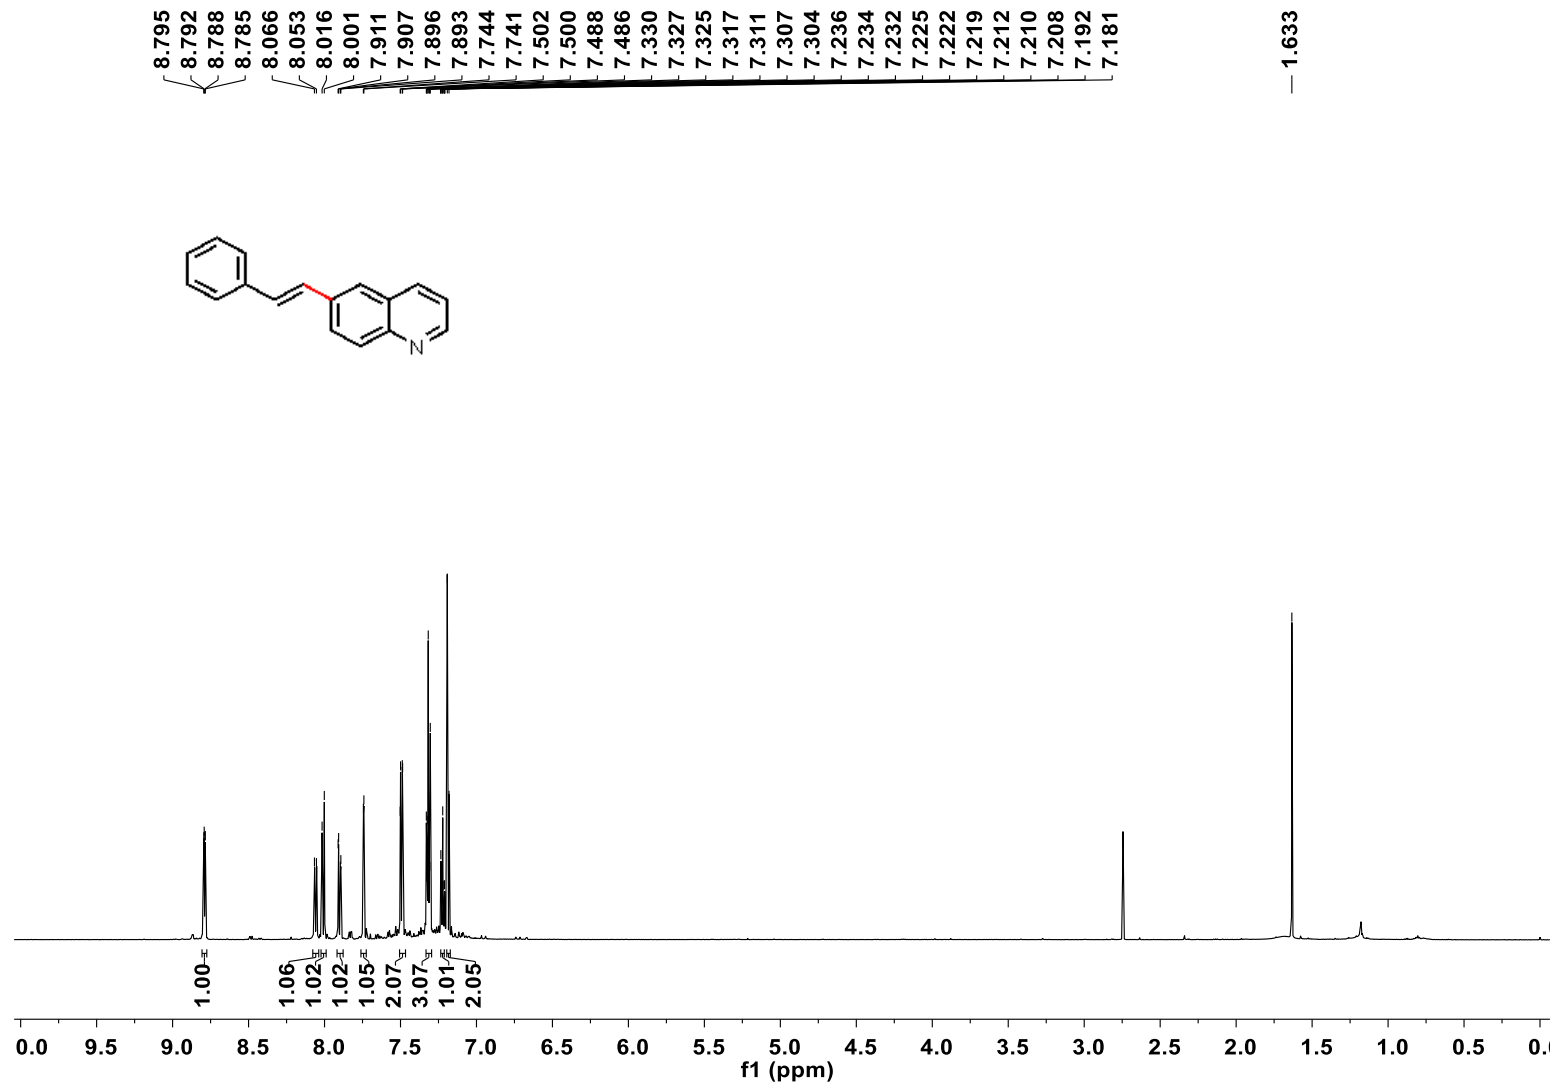

$^{13}\text{C}$  NMR (151 MHz,  $\text{CDCl}_3$ ) spectrum of **2au**

150.149  
148.118  
137.028  
135.952  
135.607  
130.228  
129.819  
128.806  
128.612  
128.029  
127.873  
127.274  
126.680  
125.944  
121.546  
77.254  
77.042  
76.830

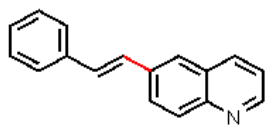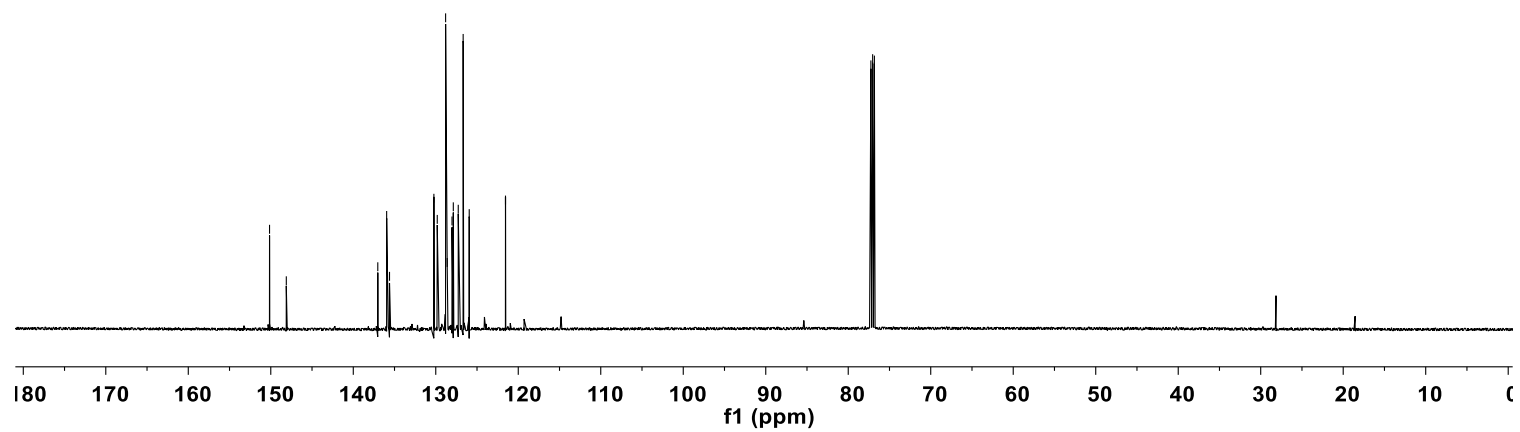

<sup>1</sup>H NMR (600 MHz, CDCl<sub>3</sub>) spectrum of **3a**

8.795  
8.791  
8.157  
7.902  
7.877  
7.851  
7.749  
7.734  
7.702  
7.699  
7.688  
7.685  
— 7.264

6.598  
6.572

4.320  
4.308  
4.296  
4.284

— 2.531

1.656  
1.378  
1.366  
1.354

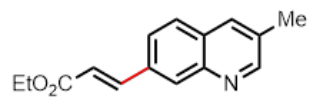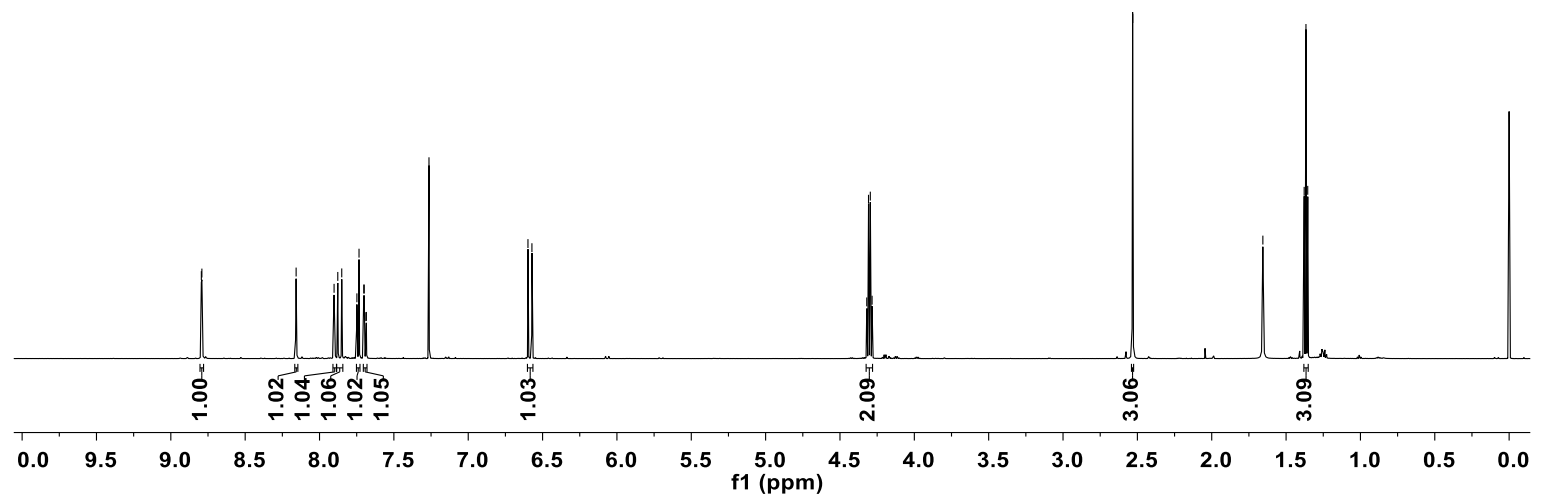



$^{13}\text{C}$  NMR (151 MHz,  $\text{CDCl}_3$ ) spectrum of **3a**

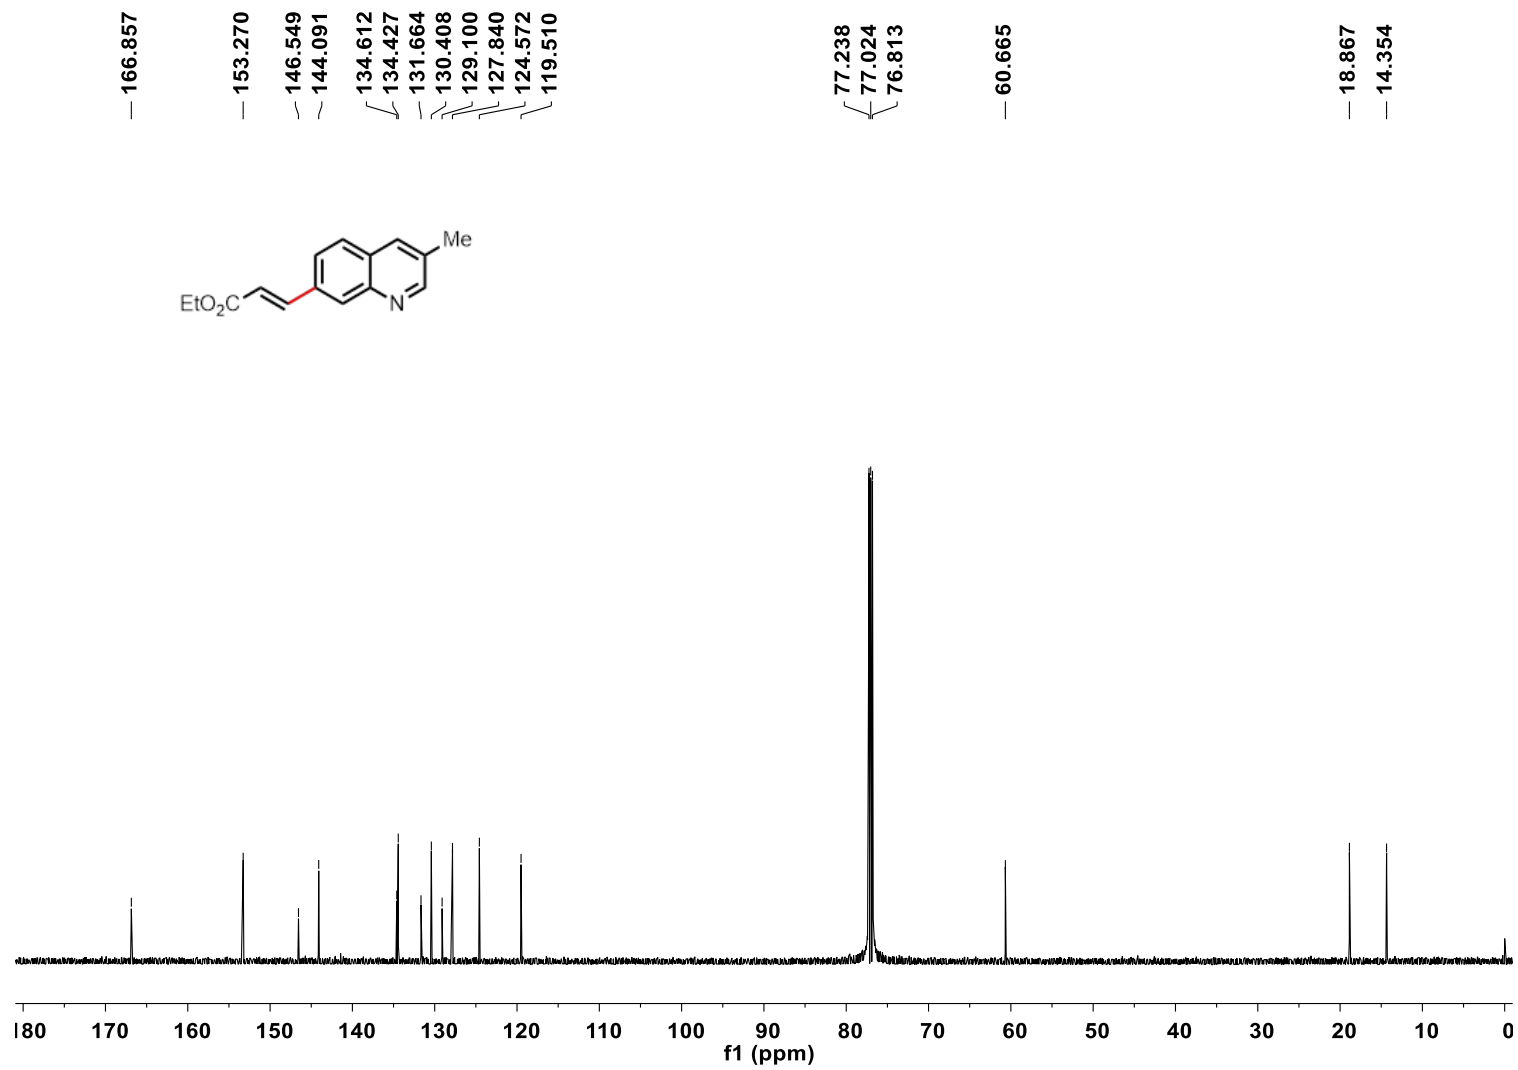

<sup>1</sup>H NMR (600 MHz, CDCl<sub>3</sub>) spectrum of **3b**

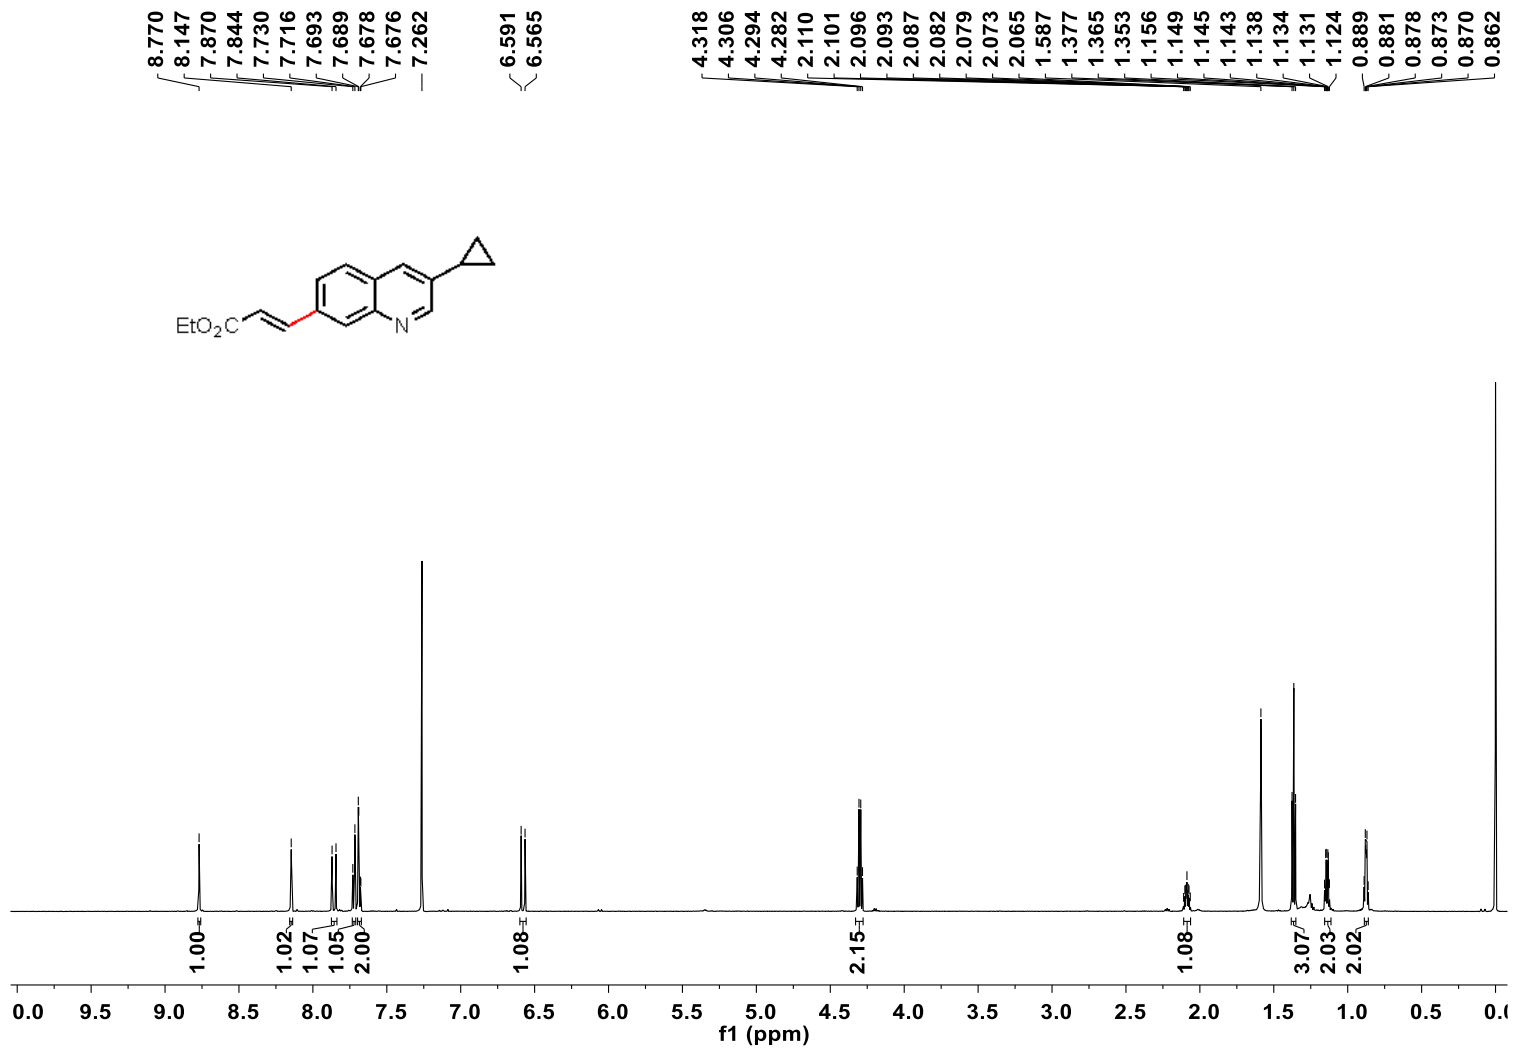

<sup>13</sup>C NMR (151 MHz, CDCl<sub>3</sub>) spectrum of **3b**

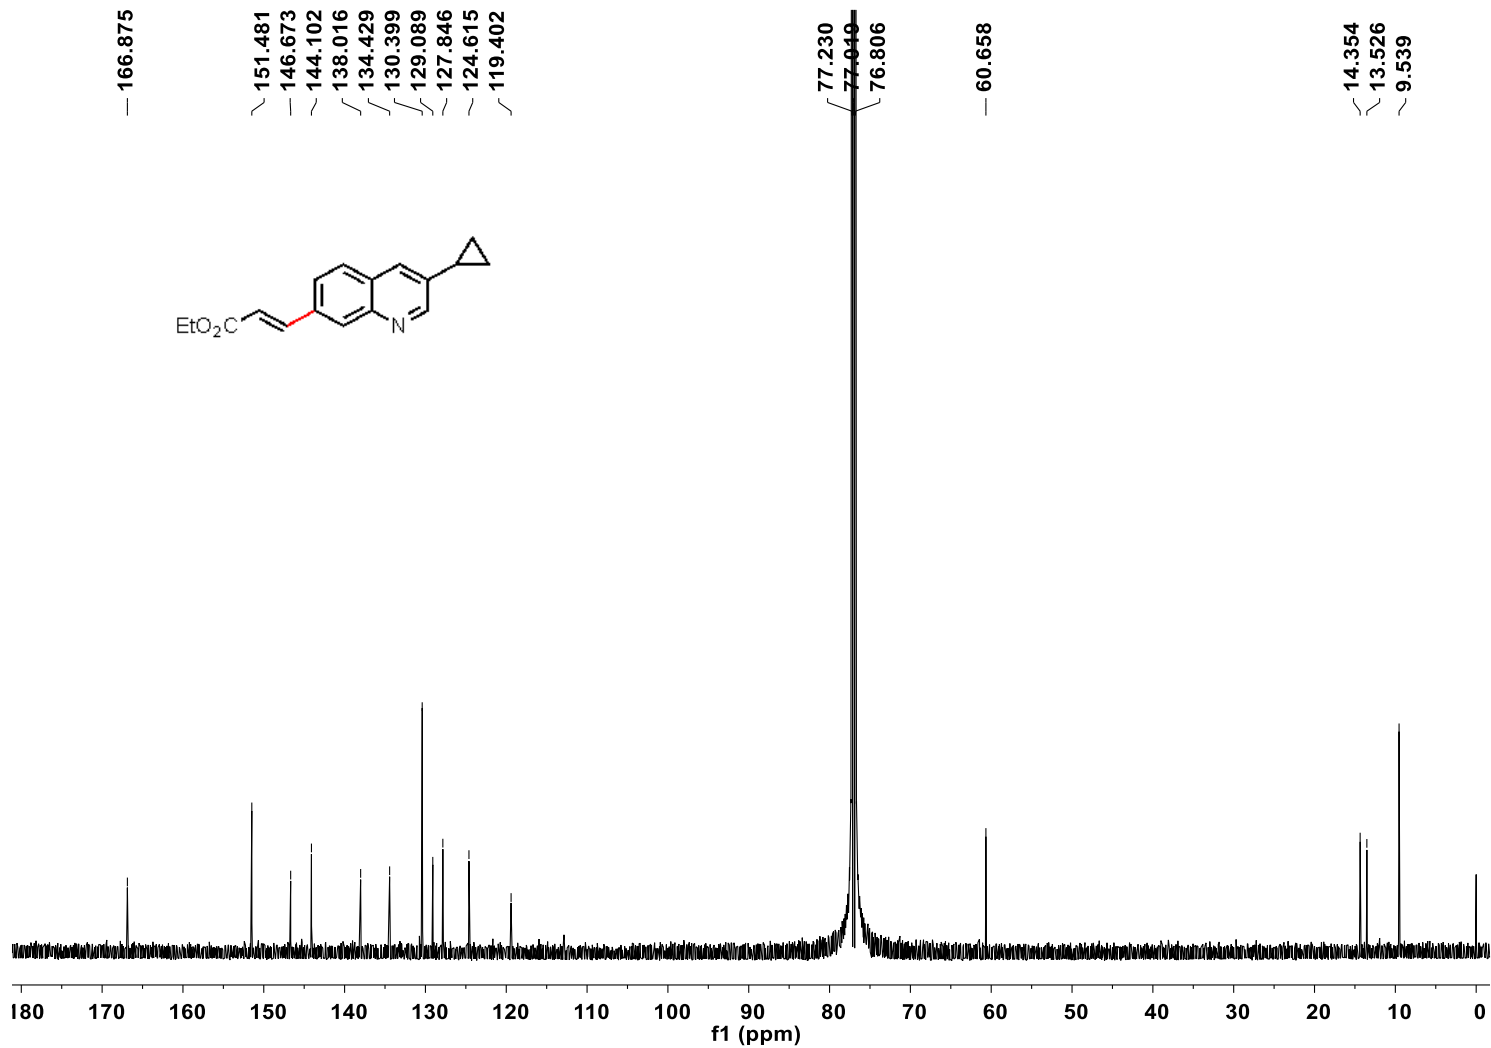

<sup>1</sup>H NMR (600 MHz, CDCl<sub>3</sub>) spectrum of **3c**

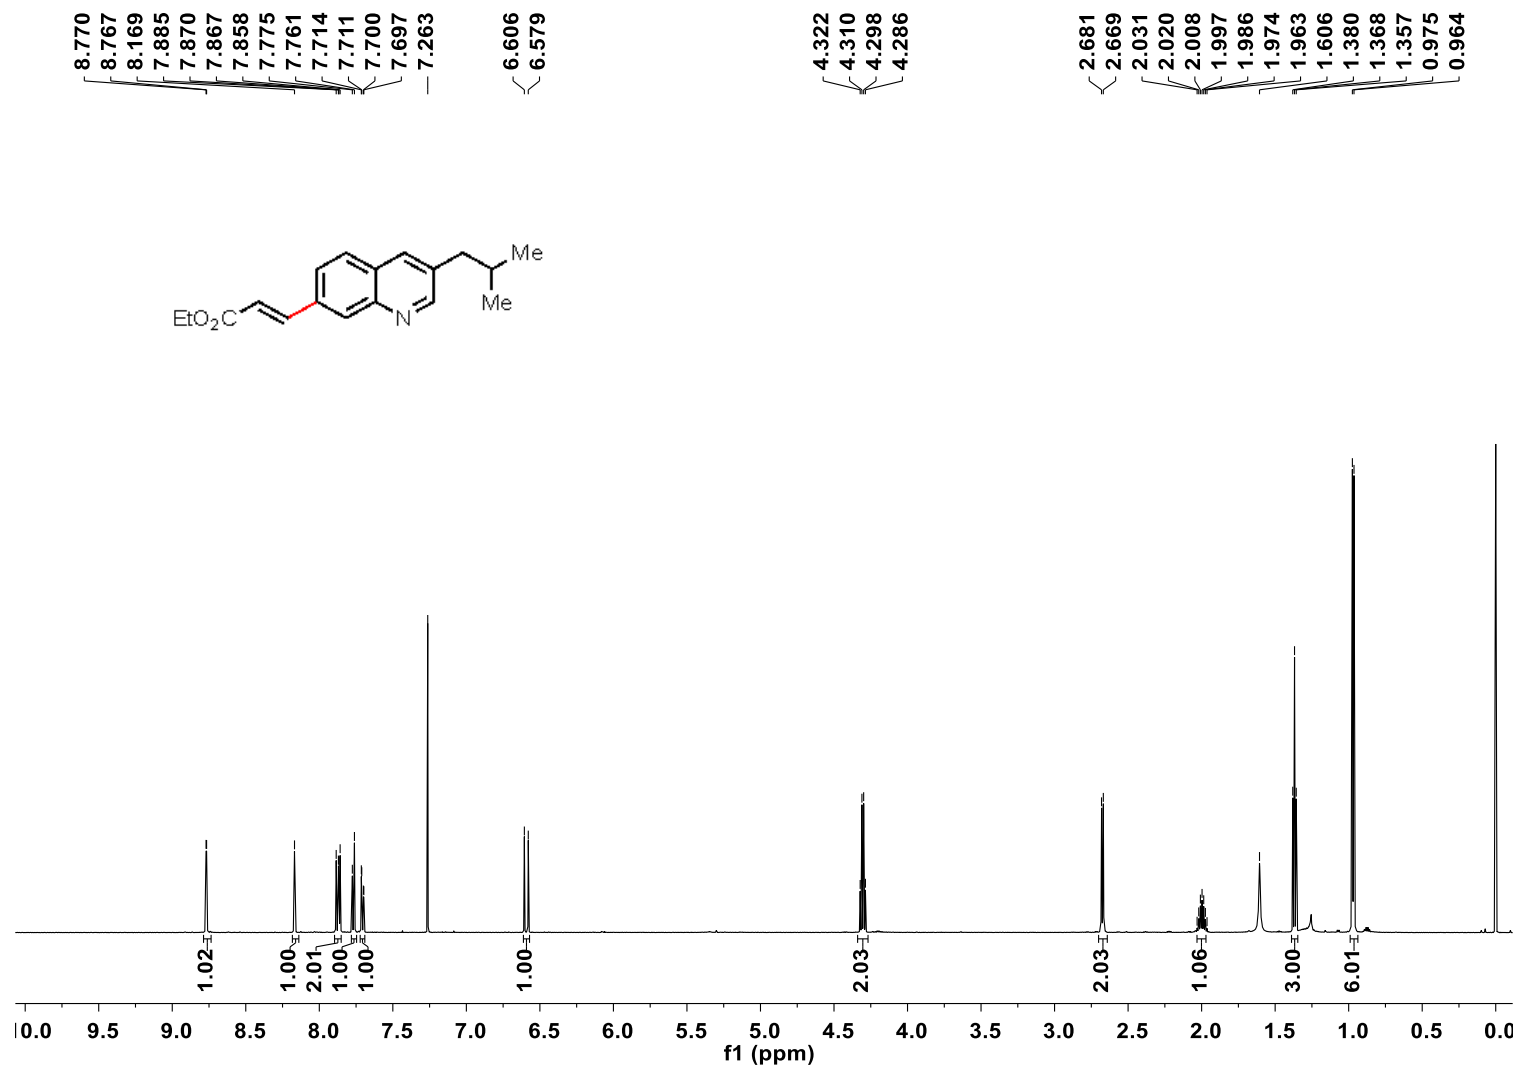

<sup>13</sup>C NMR (151 MHz, CDCl<sub>3</sub>) spectrum of **3c**

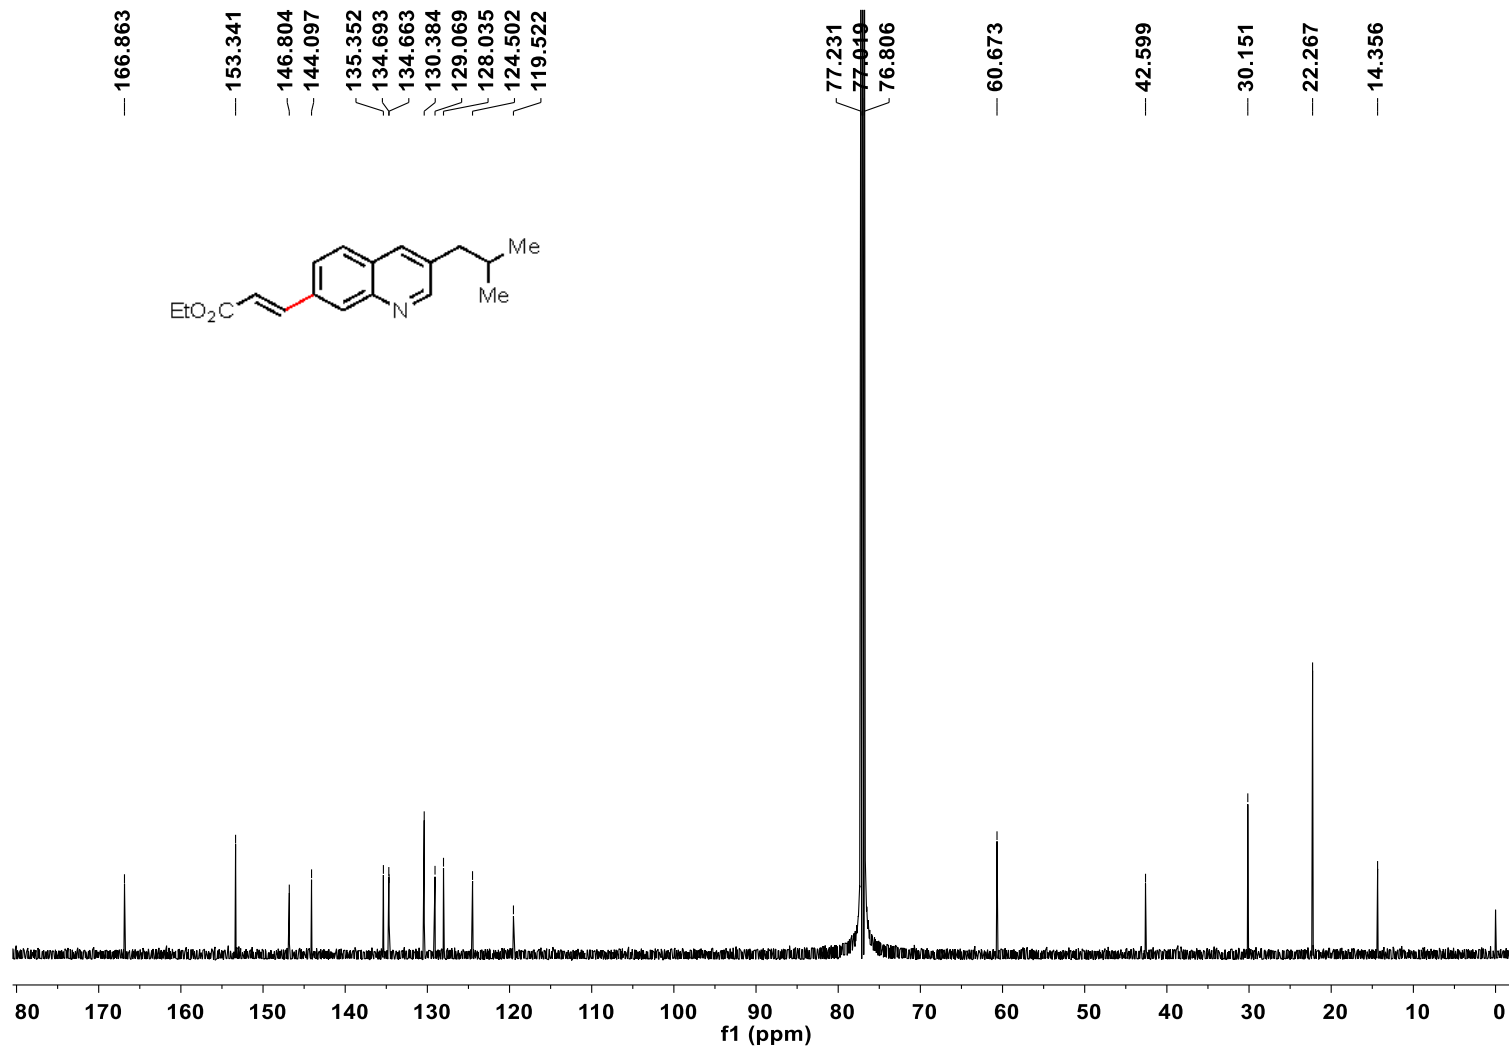

<sup>1</sup>H NMR (600 MHz, CDCl<sub>3</sub>) spectrum of **3d**

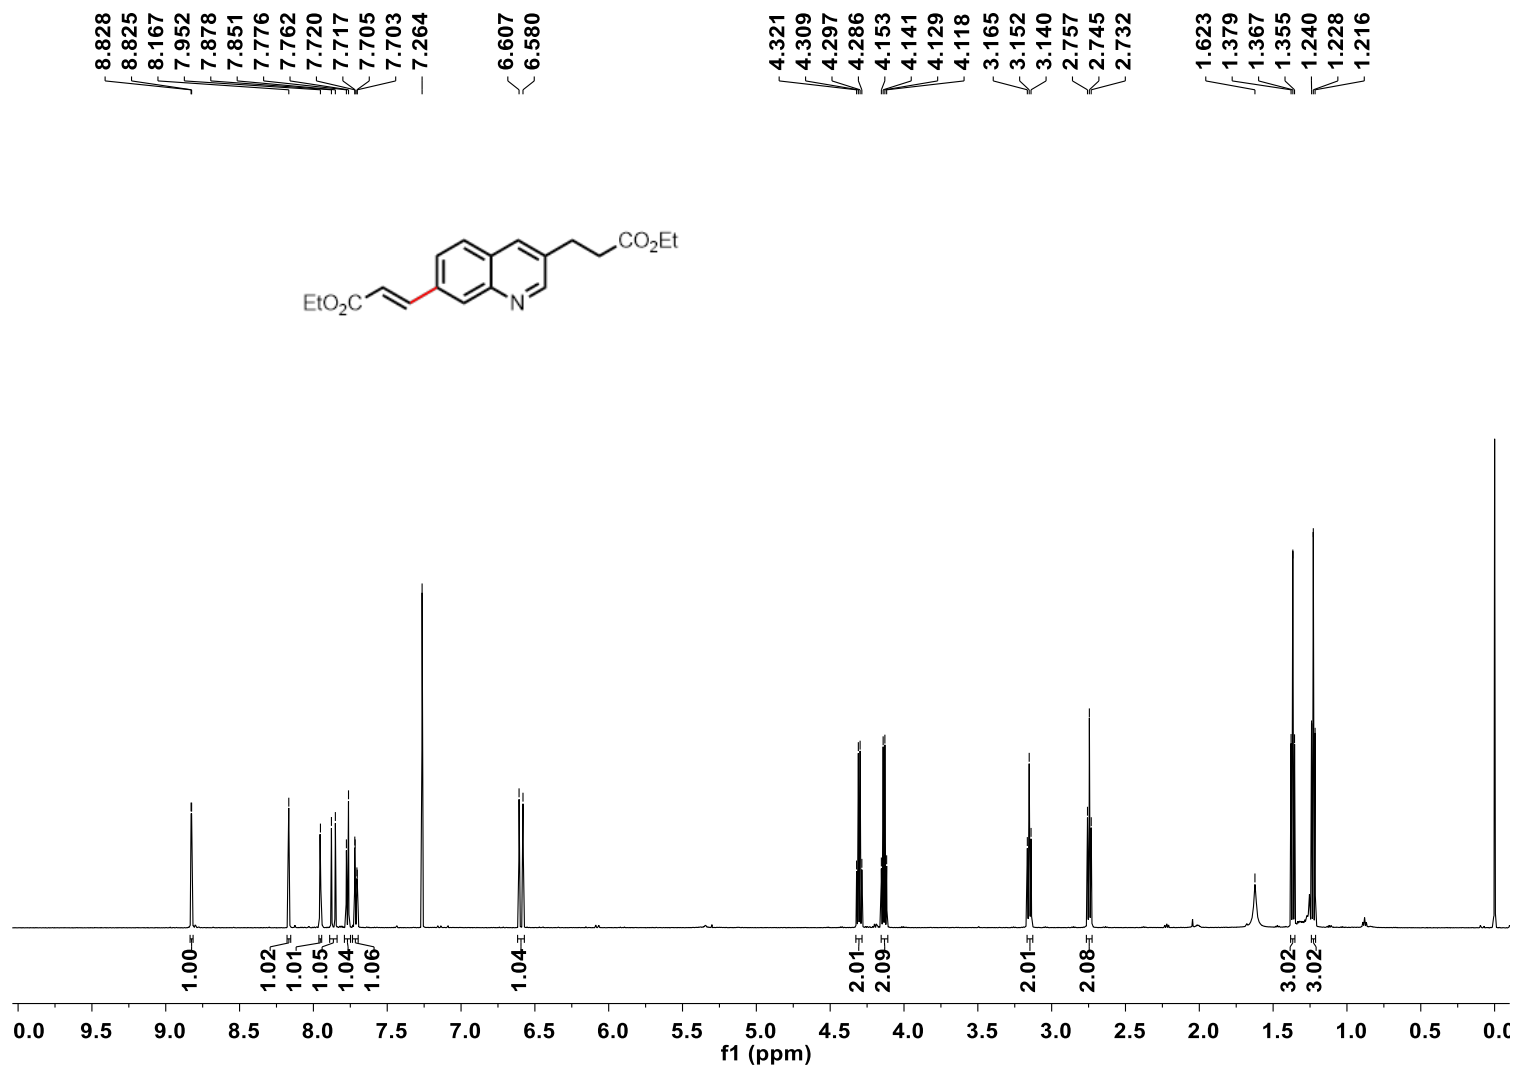

<sup>13</sup>C NMR (151 MHz, CDCl<sub>3</sub>) spectrum of **3d**

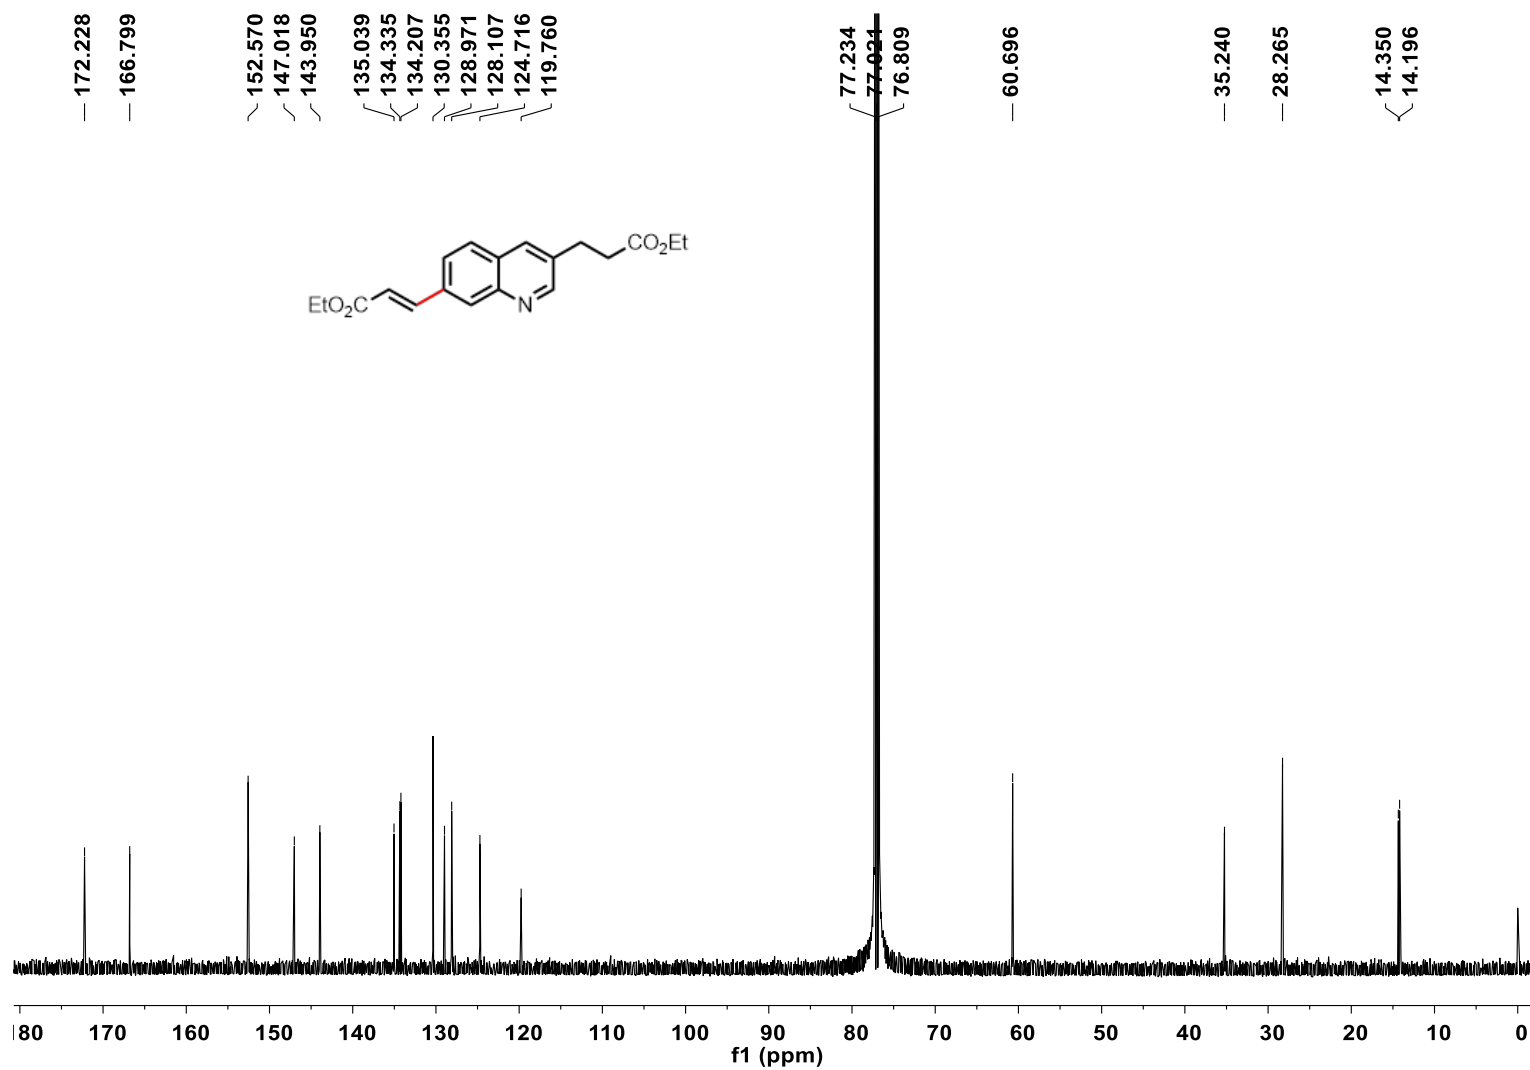

<sup>1</sup>H NMR (600 MHz, CDCl<sub>3</sub>) spectrum of 3e

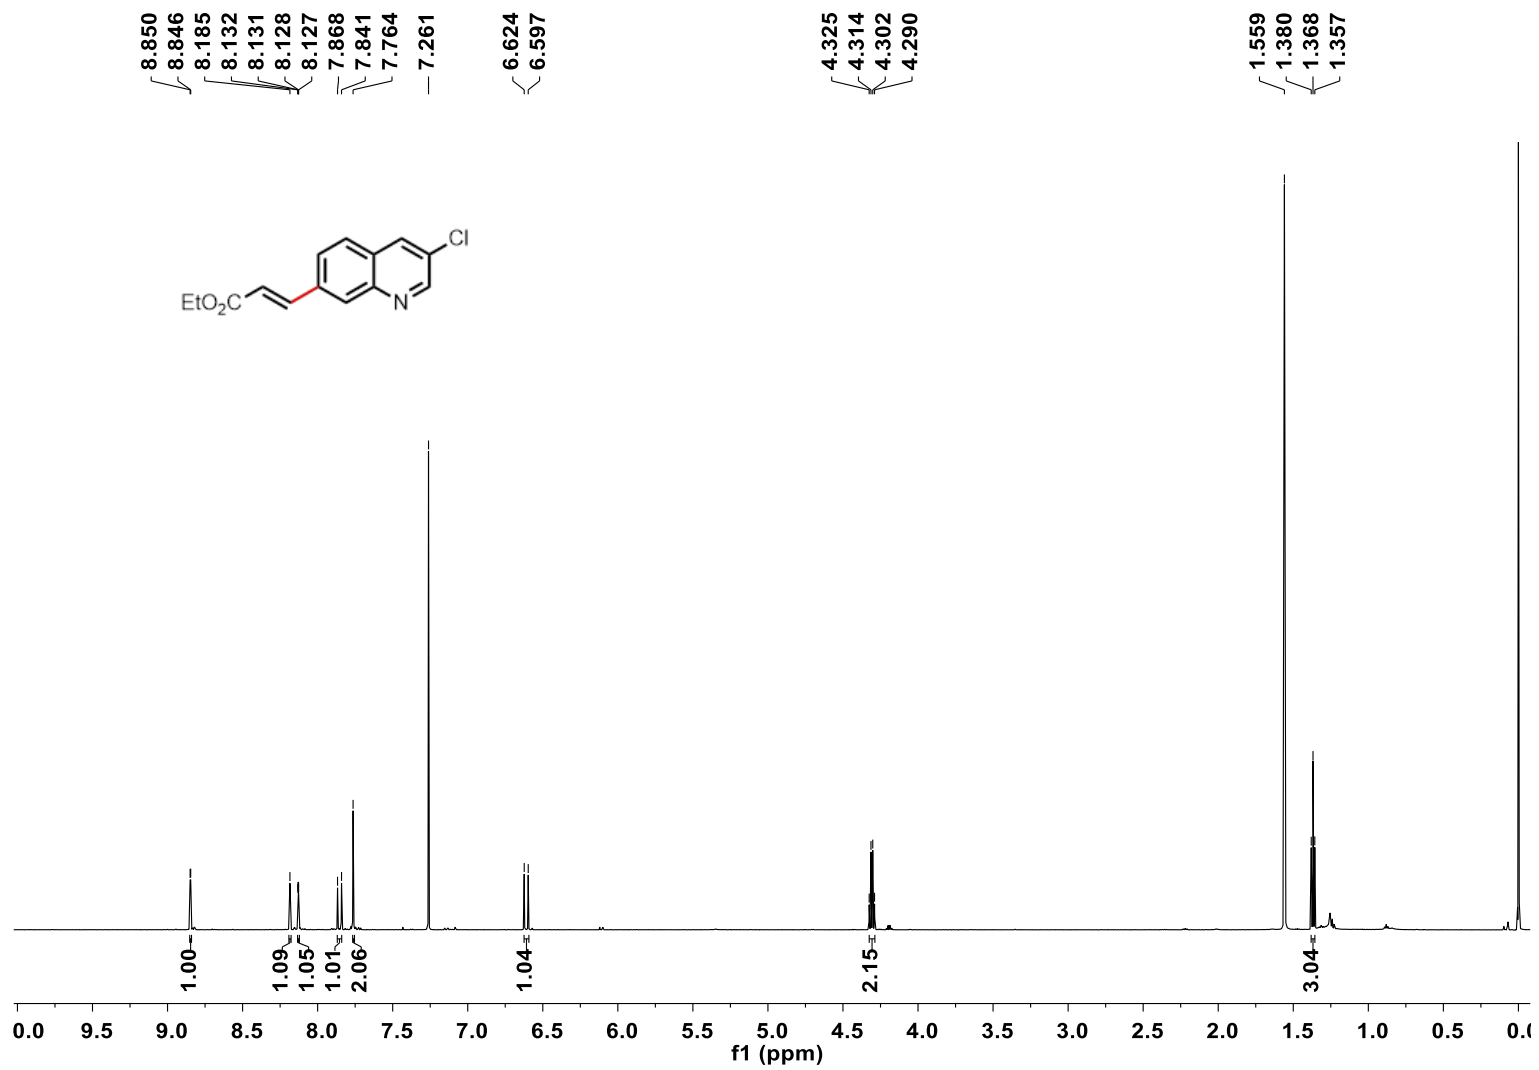



<sup>13</sup>C NMR (151 MHz, CDCl<sub>3</sub>) spectrum of **3e**

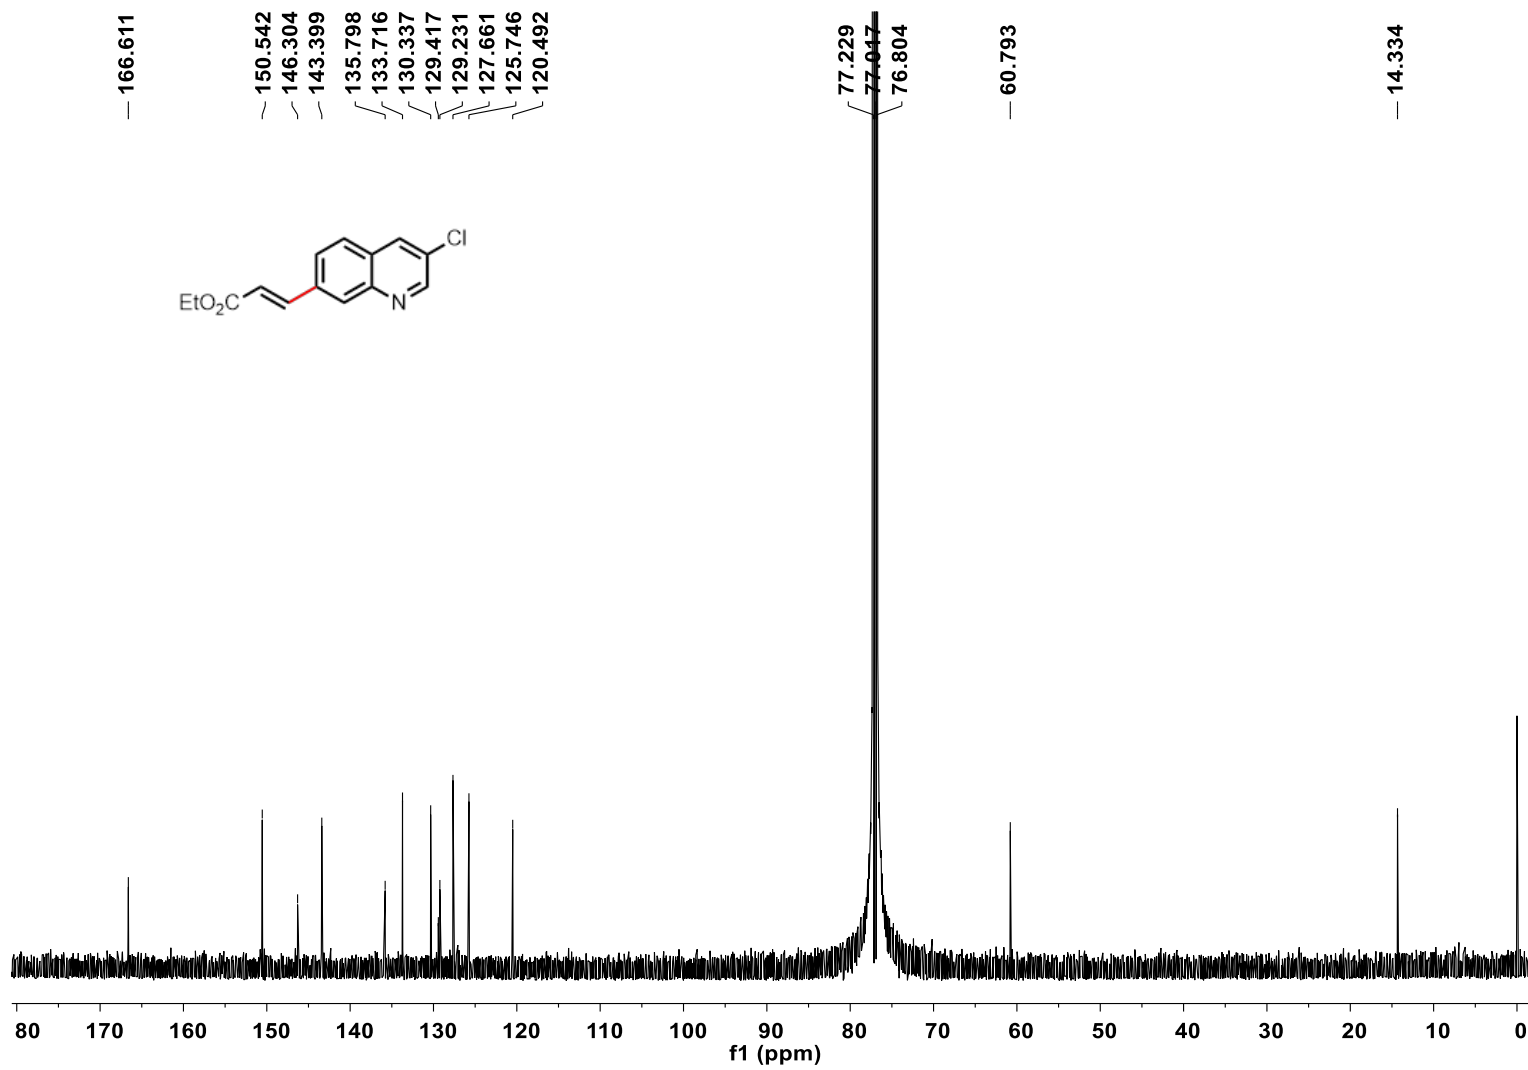

<sup>1</sup>H NMR (600 MHz, CDCl<sub>3</sub>) spectrum of **3f**

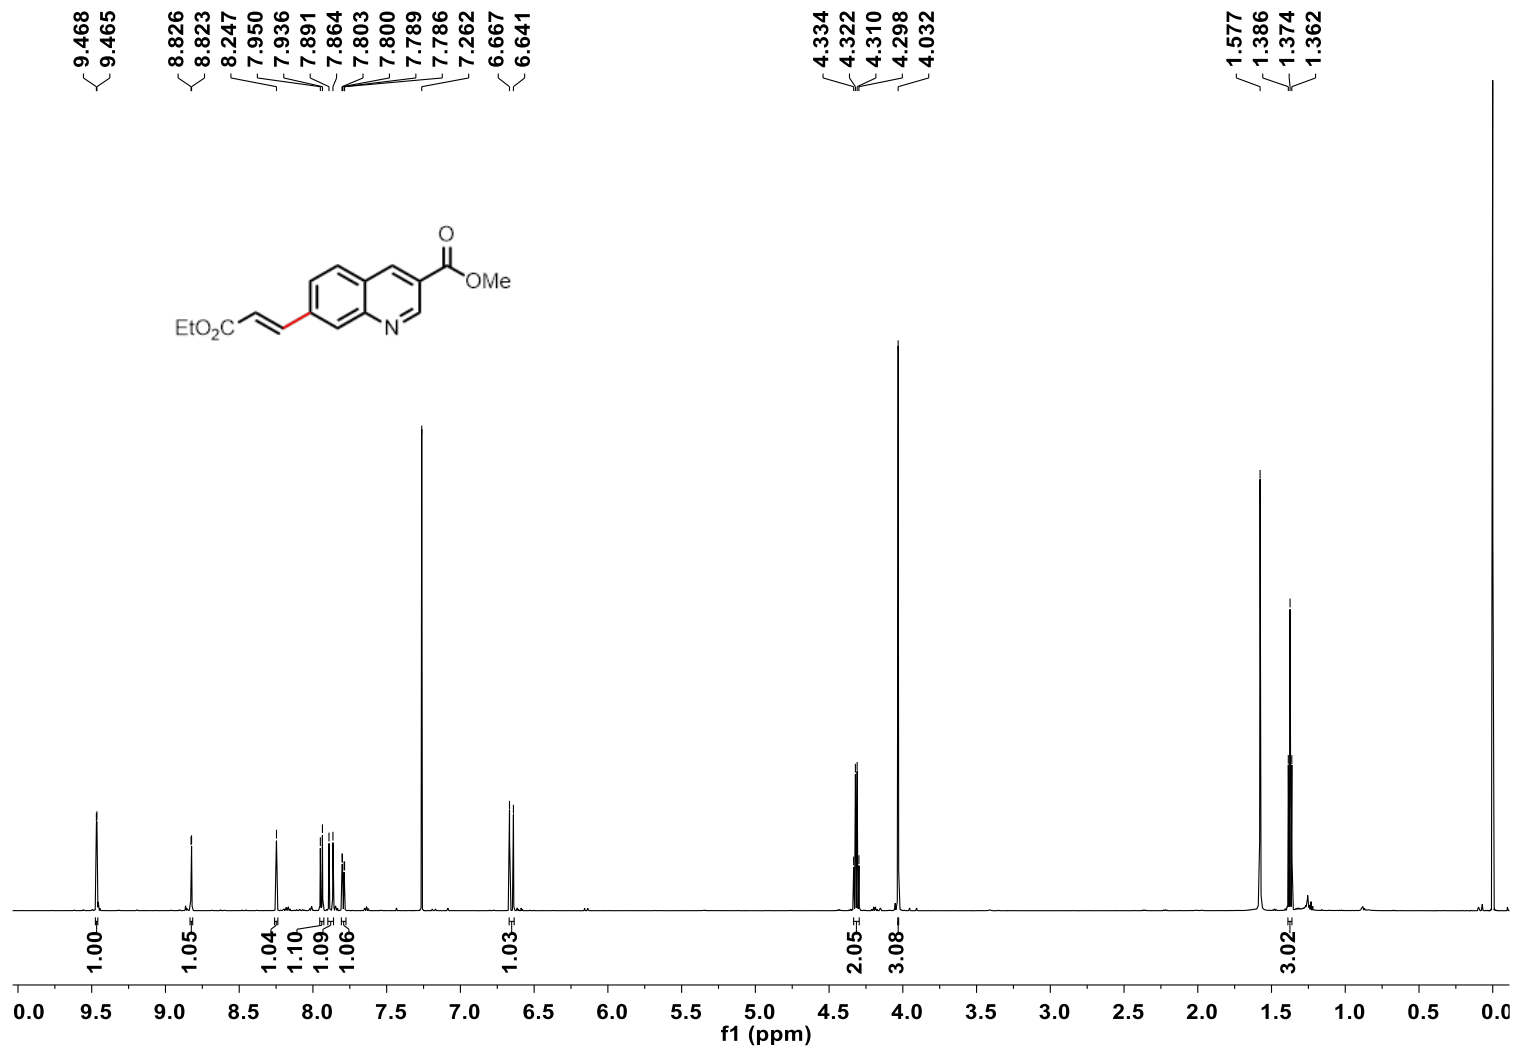

$^{13}\text{C}$  NMR (151 MHz,  $\text{CDCl}_3$ ) spectrum of **3f**

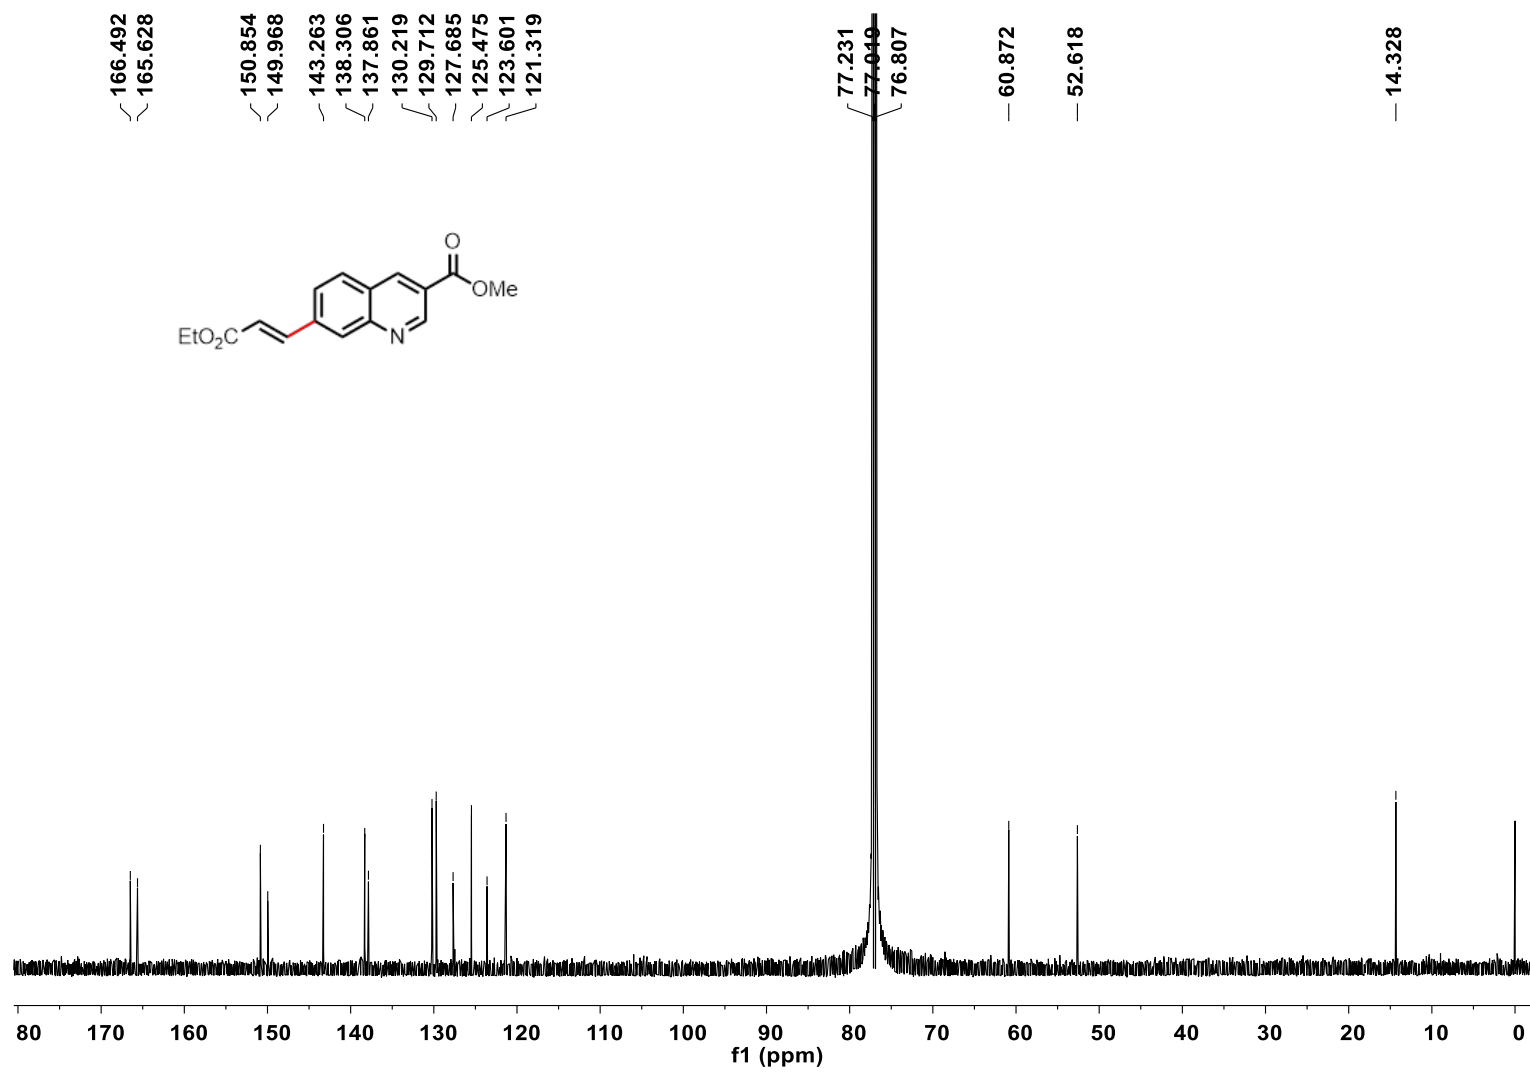

<sup>1</sup>H NMR (600 MHz, CDCl<sub>3</sub>) spectrum of **3g**

8.693  
8.688  
8.141  
7.863  
7.837  
7.733  
7.719  
7.703  
7.689  
7.362  
7.357  
7.264  
6.574  
6.547

4.316  
4.304  
4.292  
4.280  
3.967

1.376  
1.365  
1.353

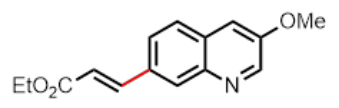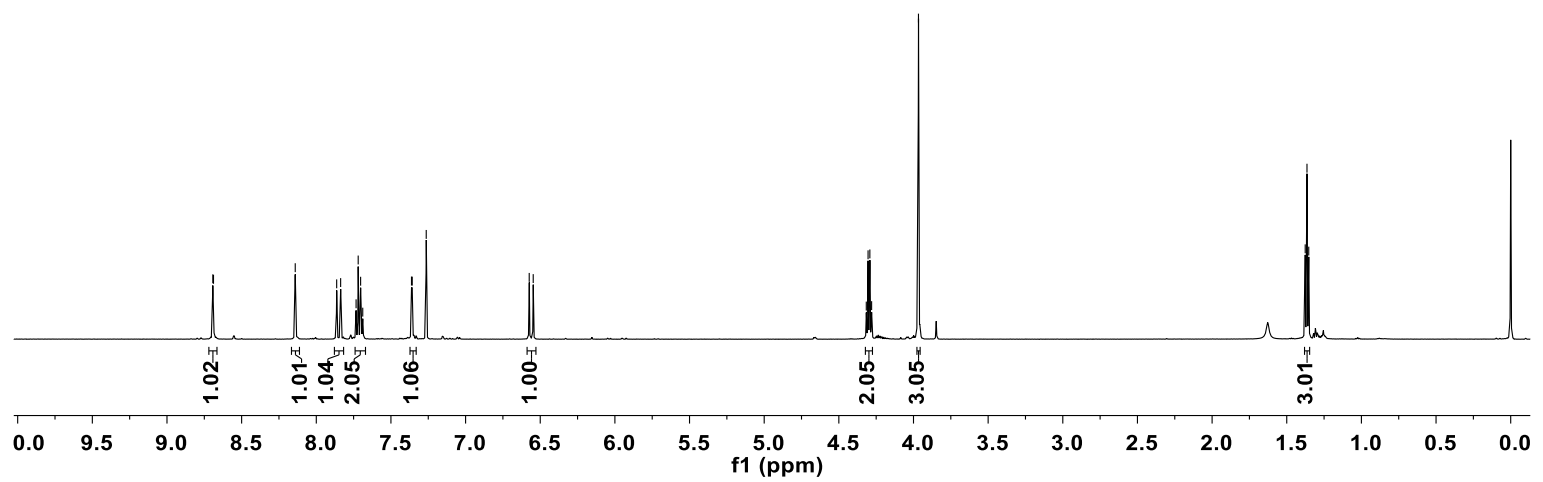

<sup>13</sup>C NMR (151 MHz, CDCl<sub>3</sub>) spectrum of **3g**

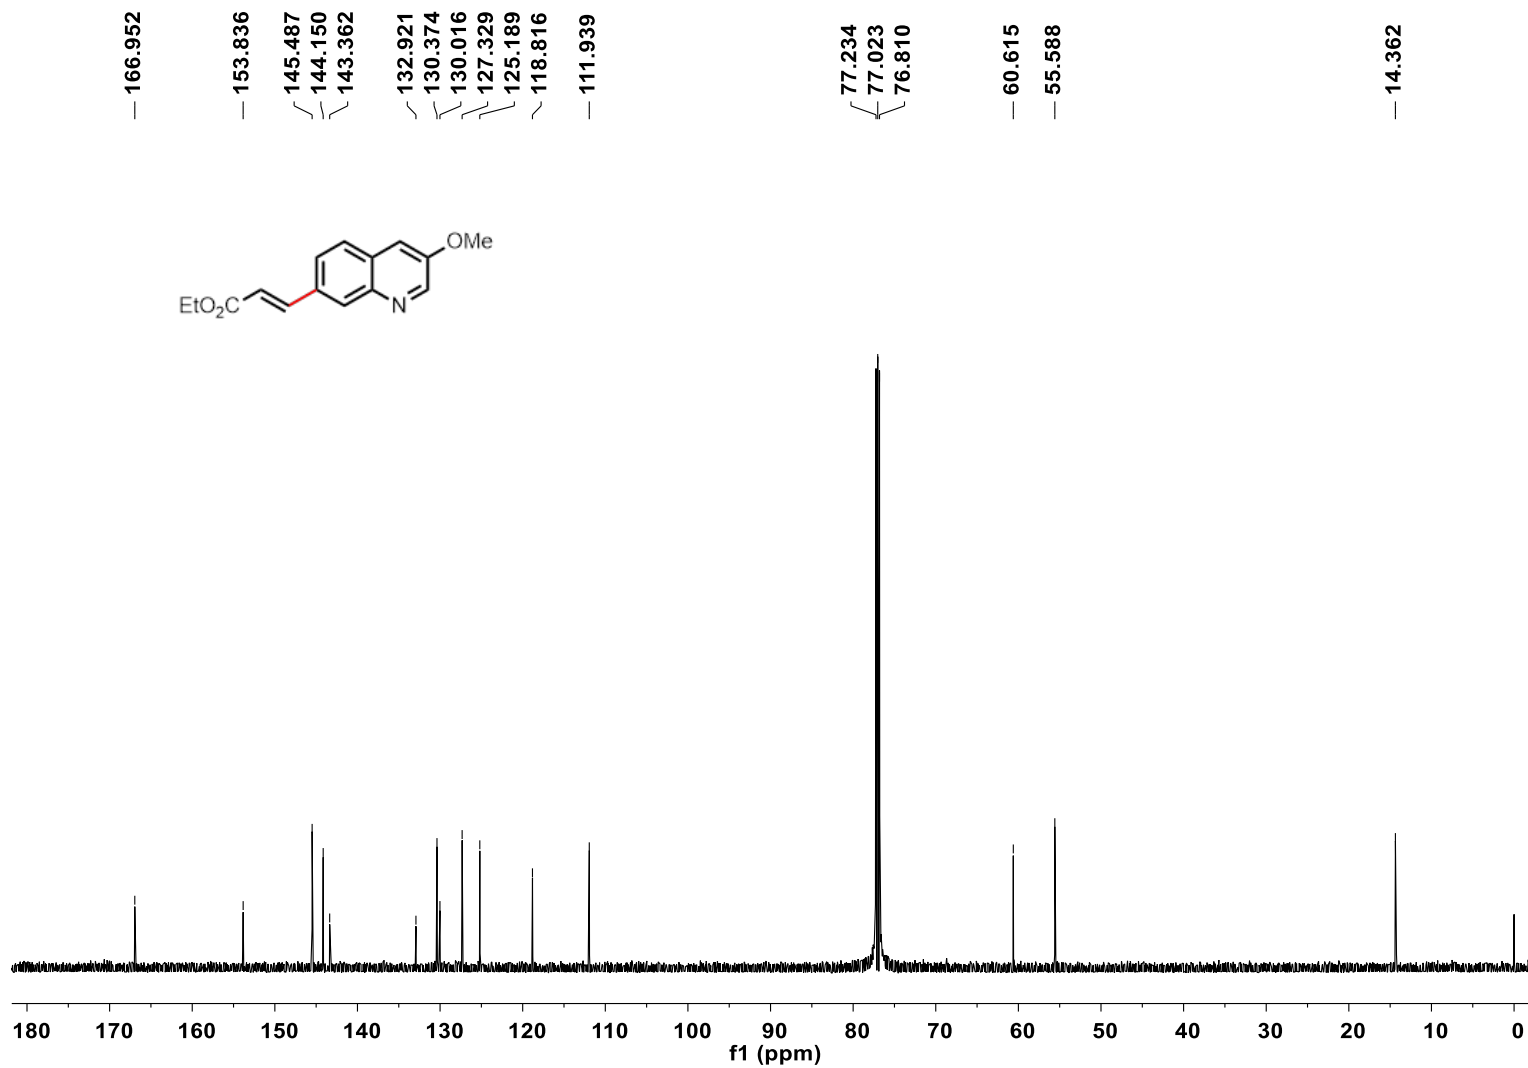

<sup>1</sup>H NMR (600 MHz, CDCl<sub>3</sub>) spectrum of **3h**

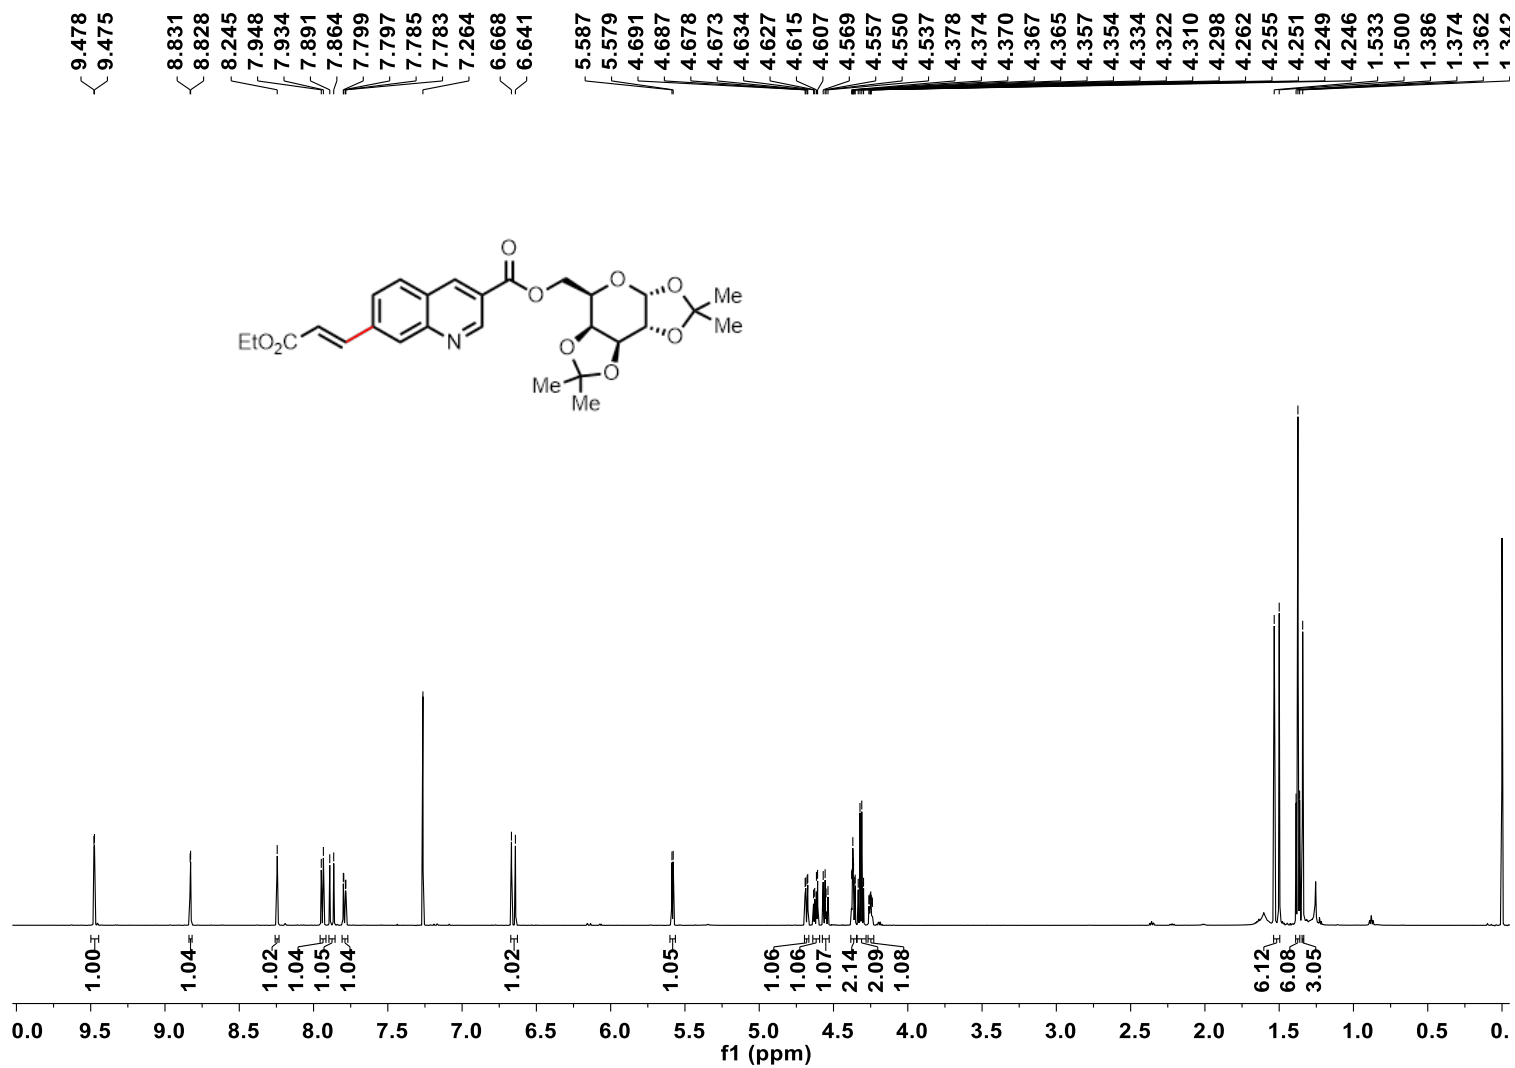

$^{13}\text{C}$  NMR (151 MHz,  $\text{CDCl}_3$ ) spectrum of **3h**

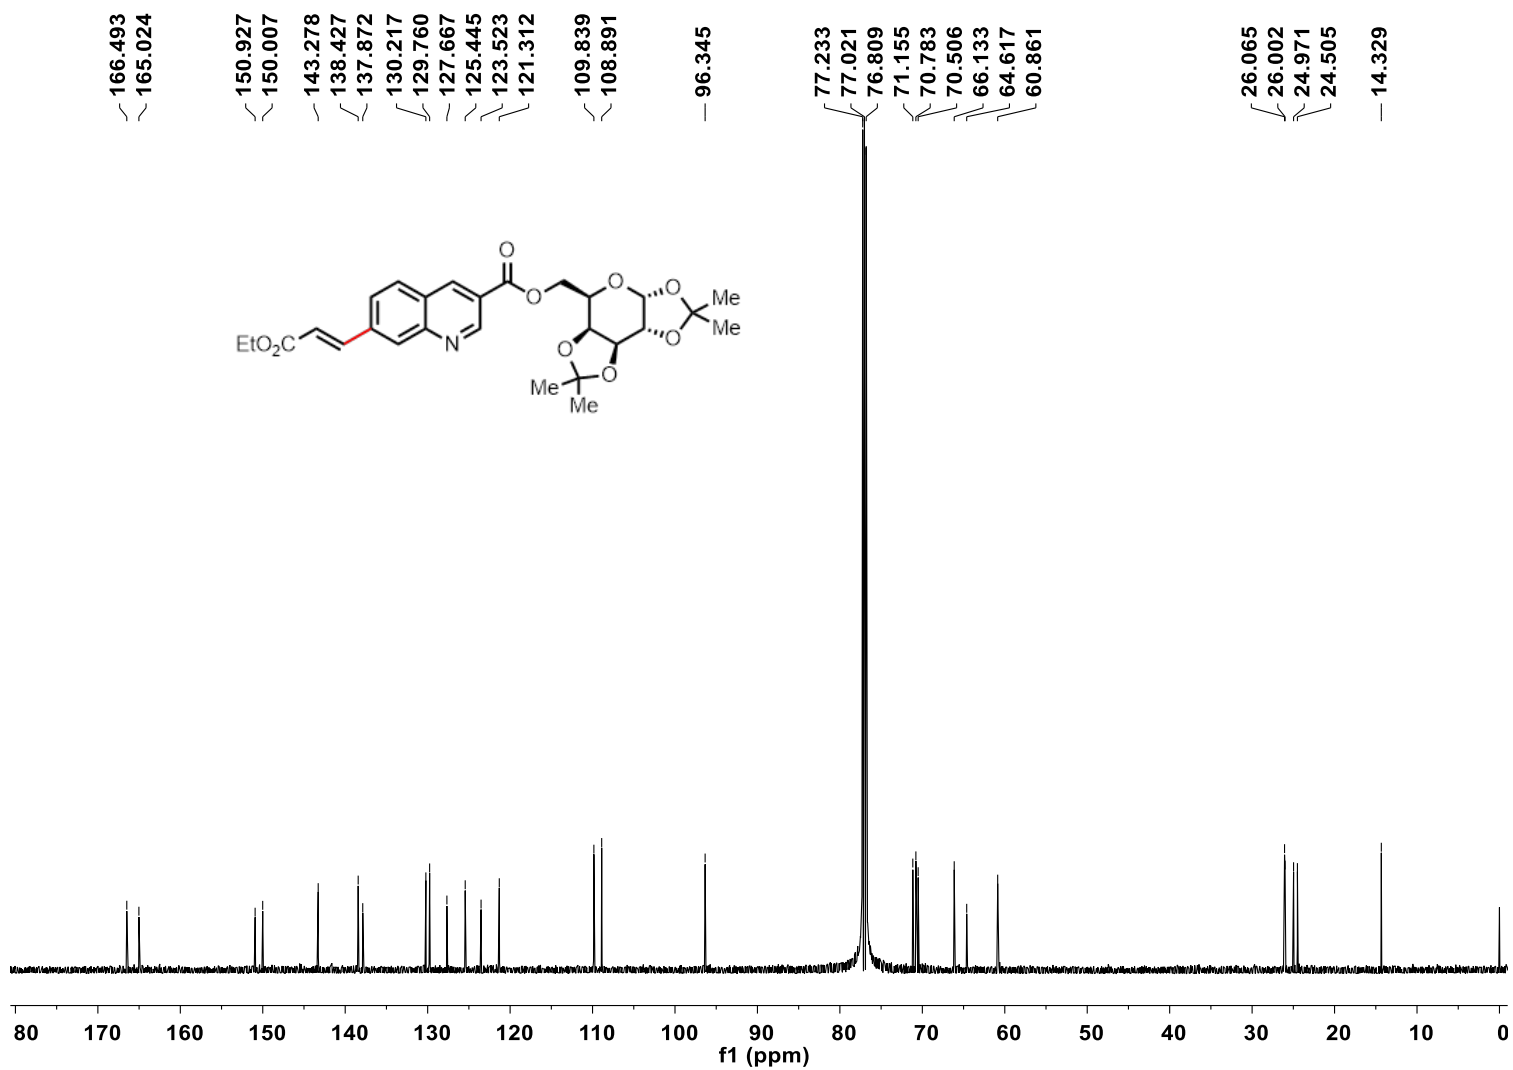

<sup>1</sup>H NMR (600 MHz, CDCl<sub>3</sub>) spectrum of **3i**

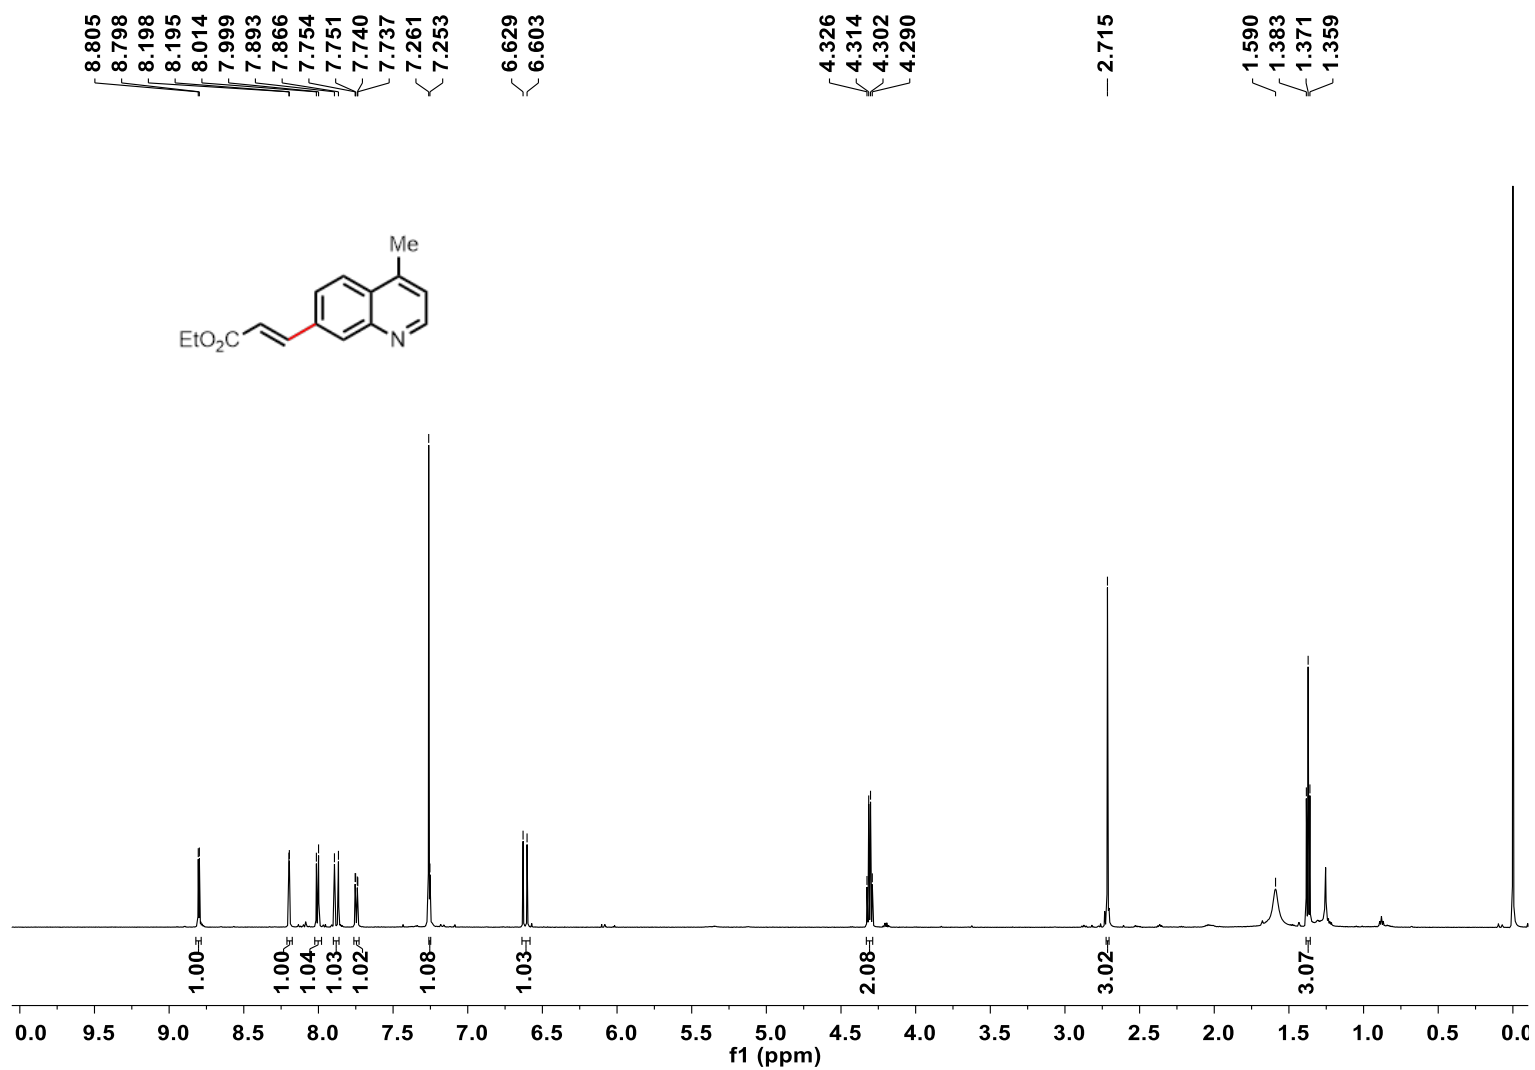



<sup>13</sup>C NMR (151 MHz, CDCl<sub>3</sub>) spectrum of **3i**

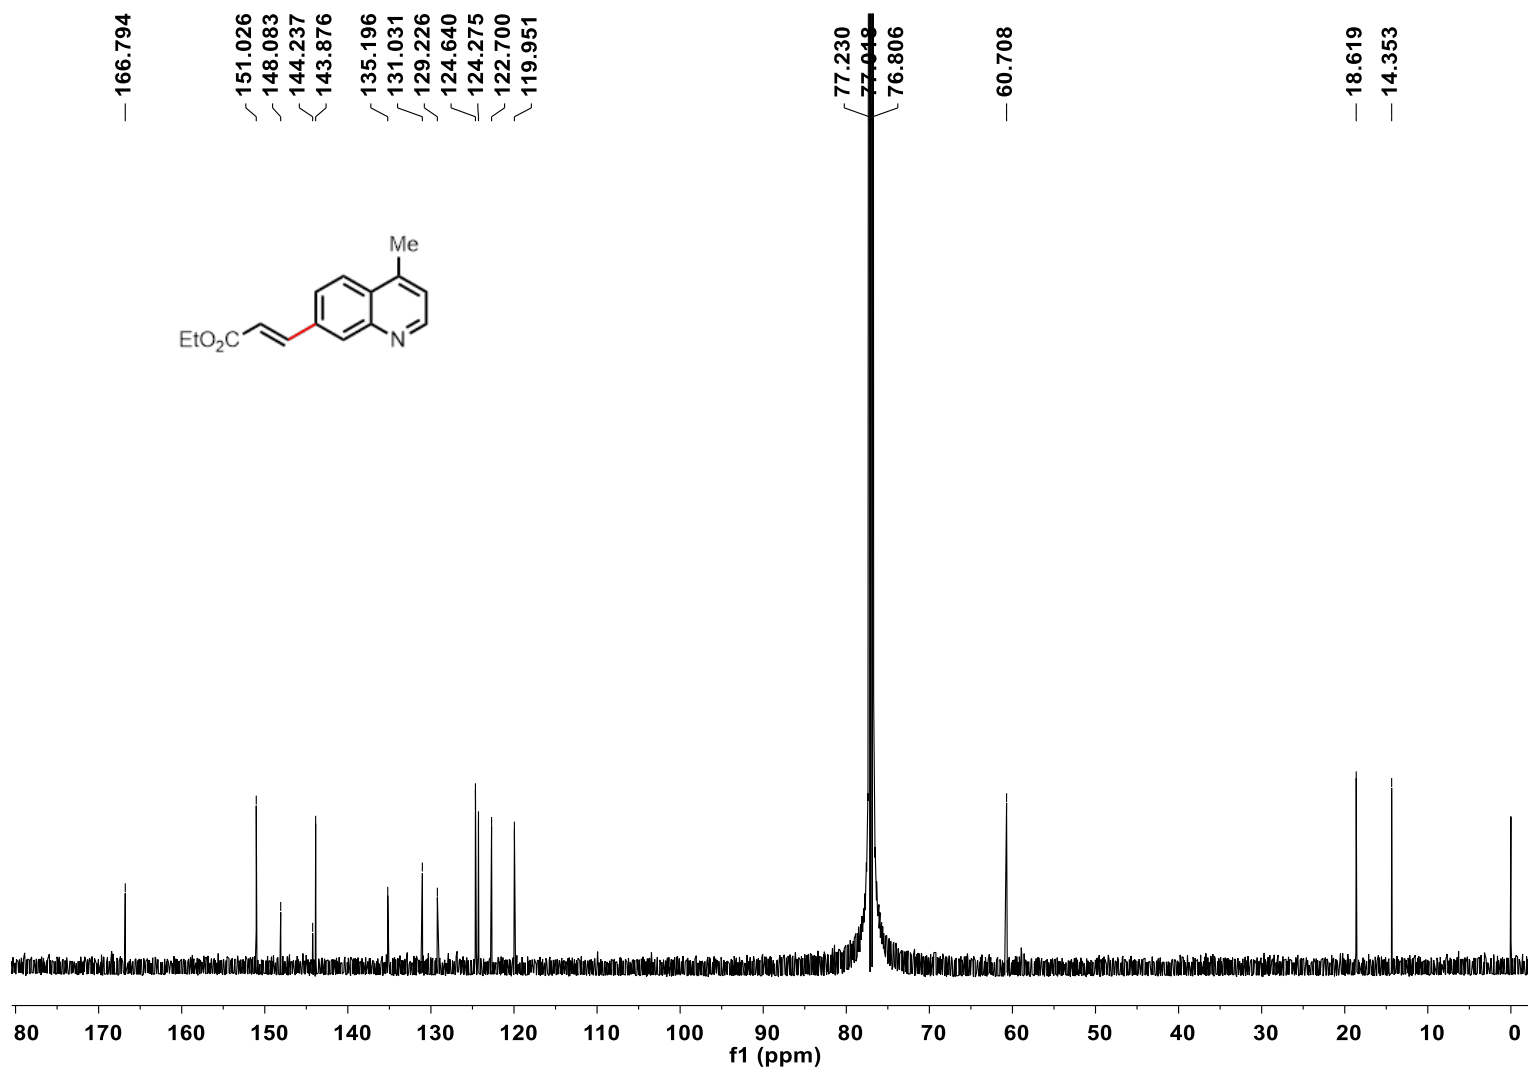

<sup>1</sup>H NMR (600 MHz, CDCl<sub>3</sub>) spectrum of **3j**

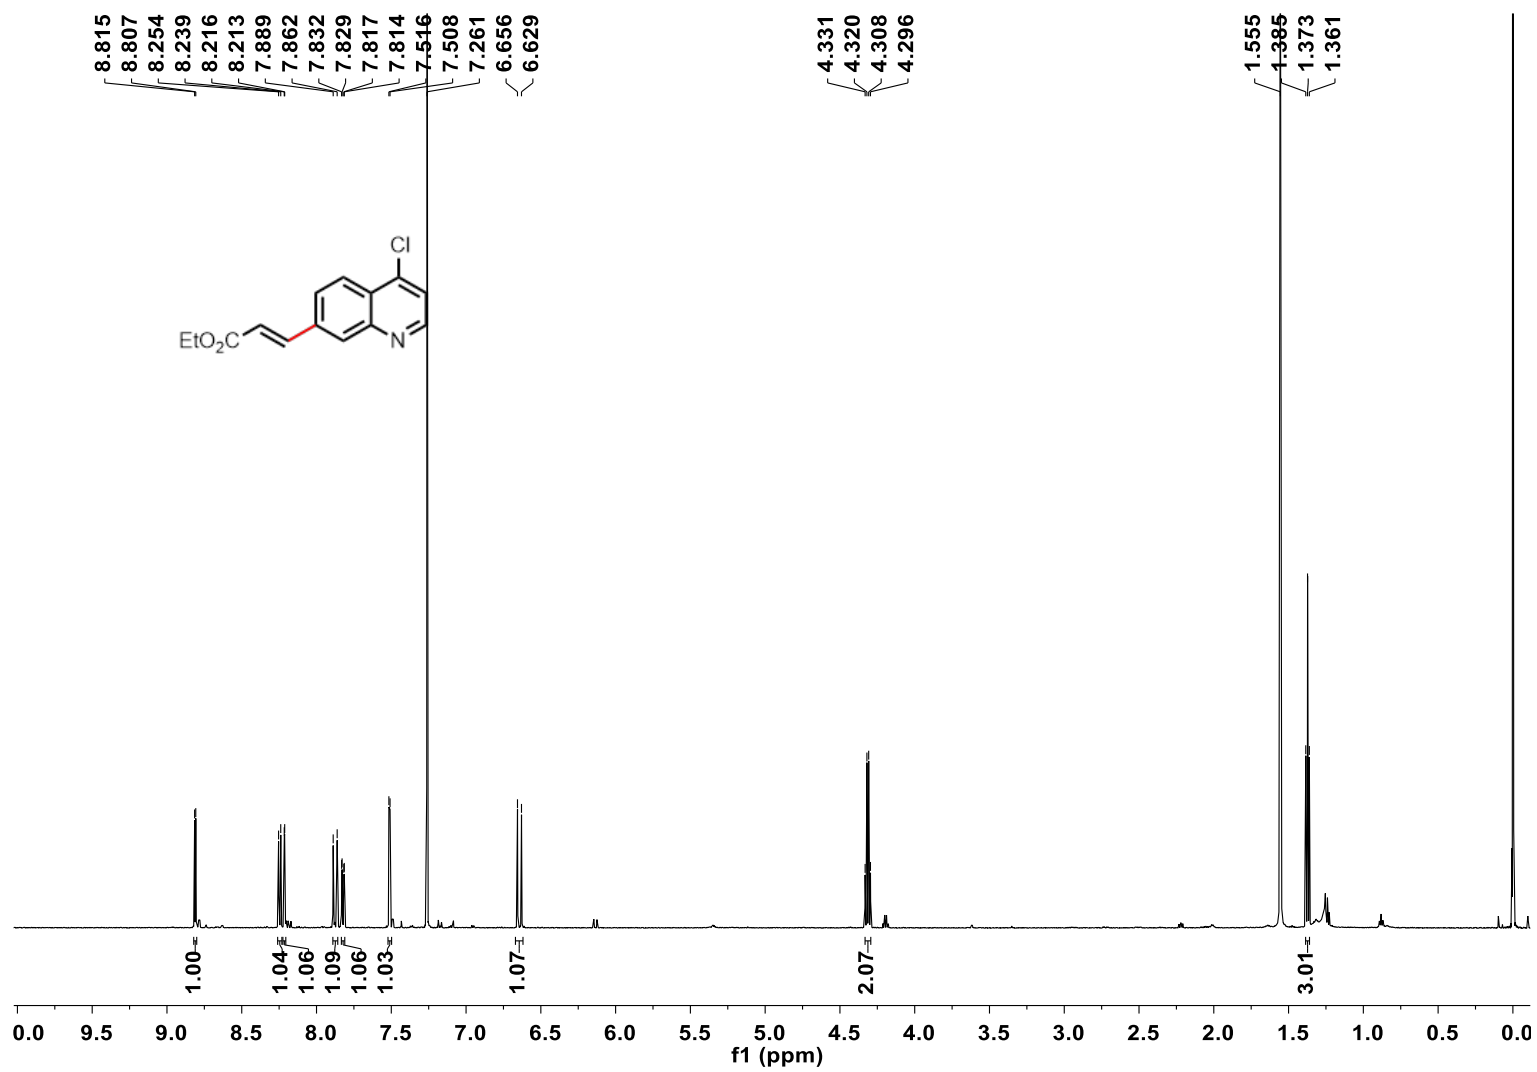

$^{13}\text{C}$  NMR (151 MHz,  $\text{CDCl}_3$ ) spectrum of **3j**

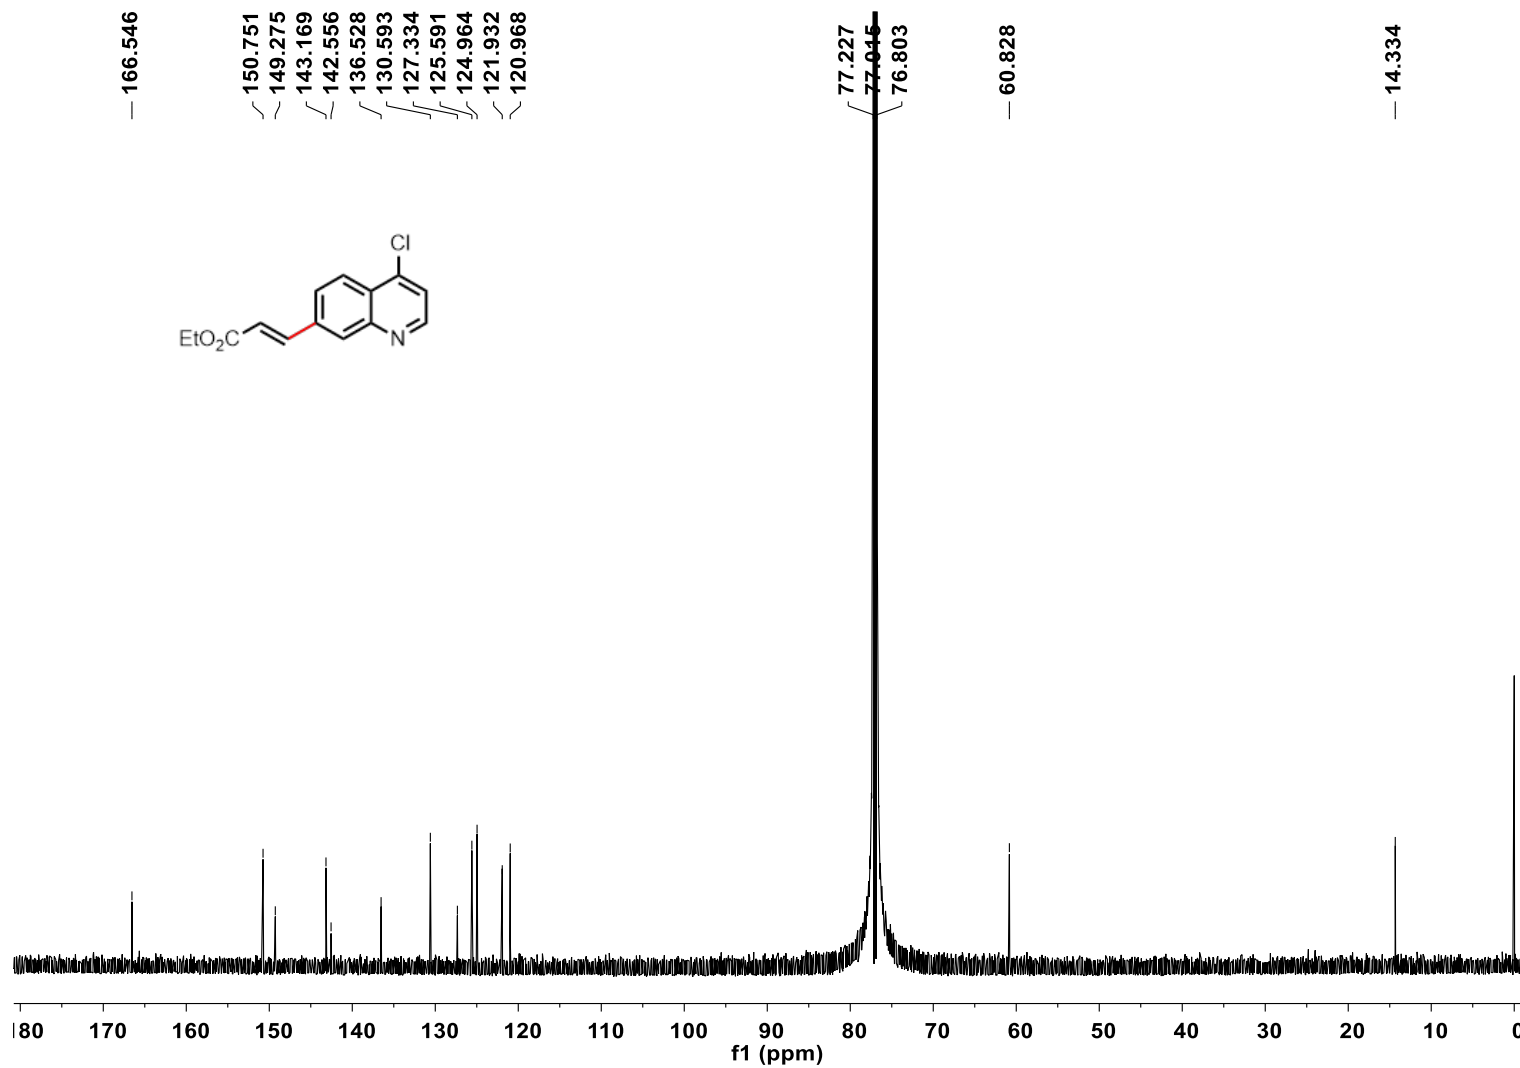

<sup>1</sup>H NMR (600 MHz, CDCl<sub>3</sub>) spectrum of **3k**

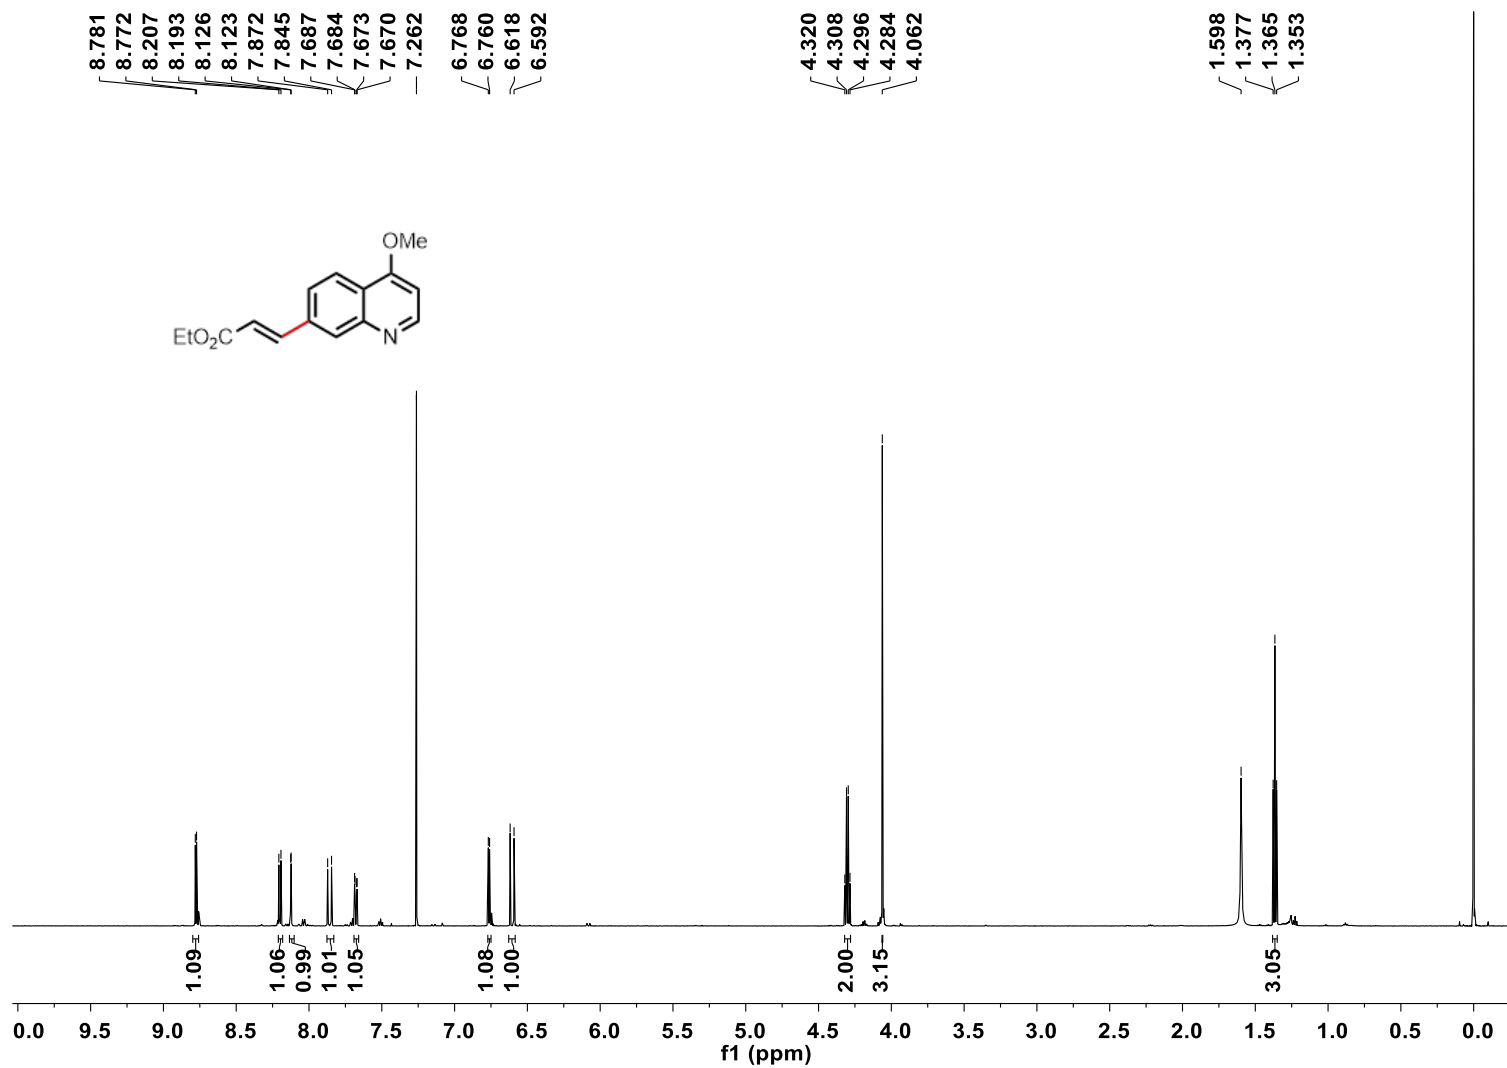

<sup>13</sup>C NMR (151 MHz, CDCl<sub>3</sub>) spectrum of **3k**

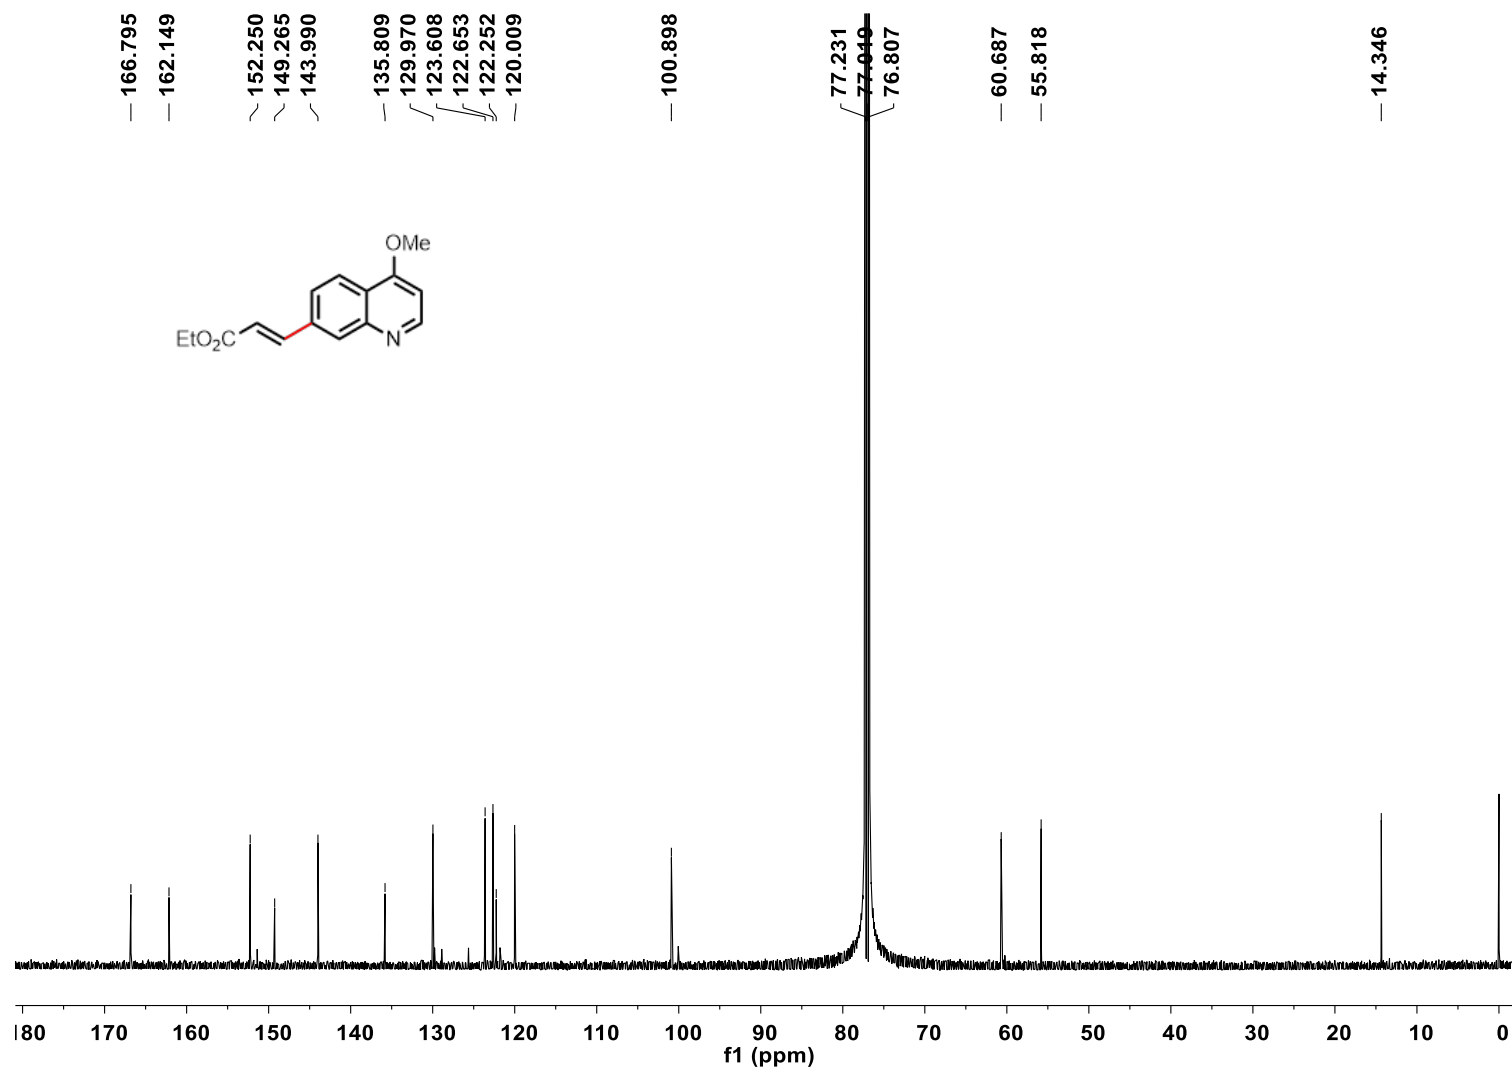

<sup>1</sup>H NMR (600 MHz, CDCl<sub>3</sub>) spectrum of **31**

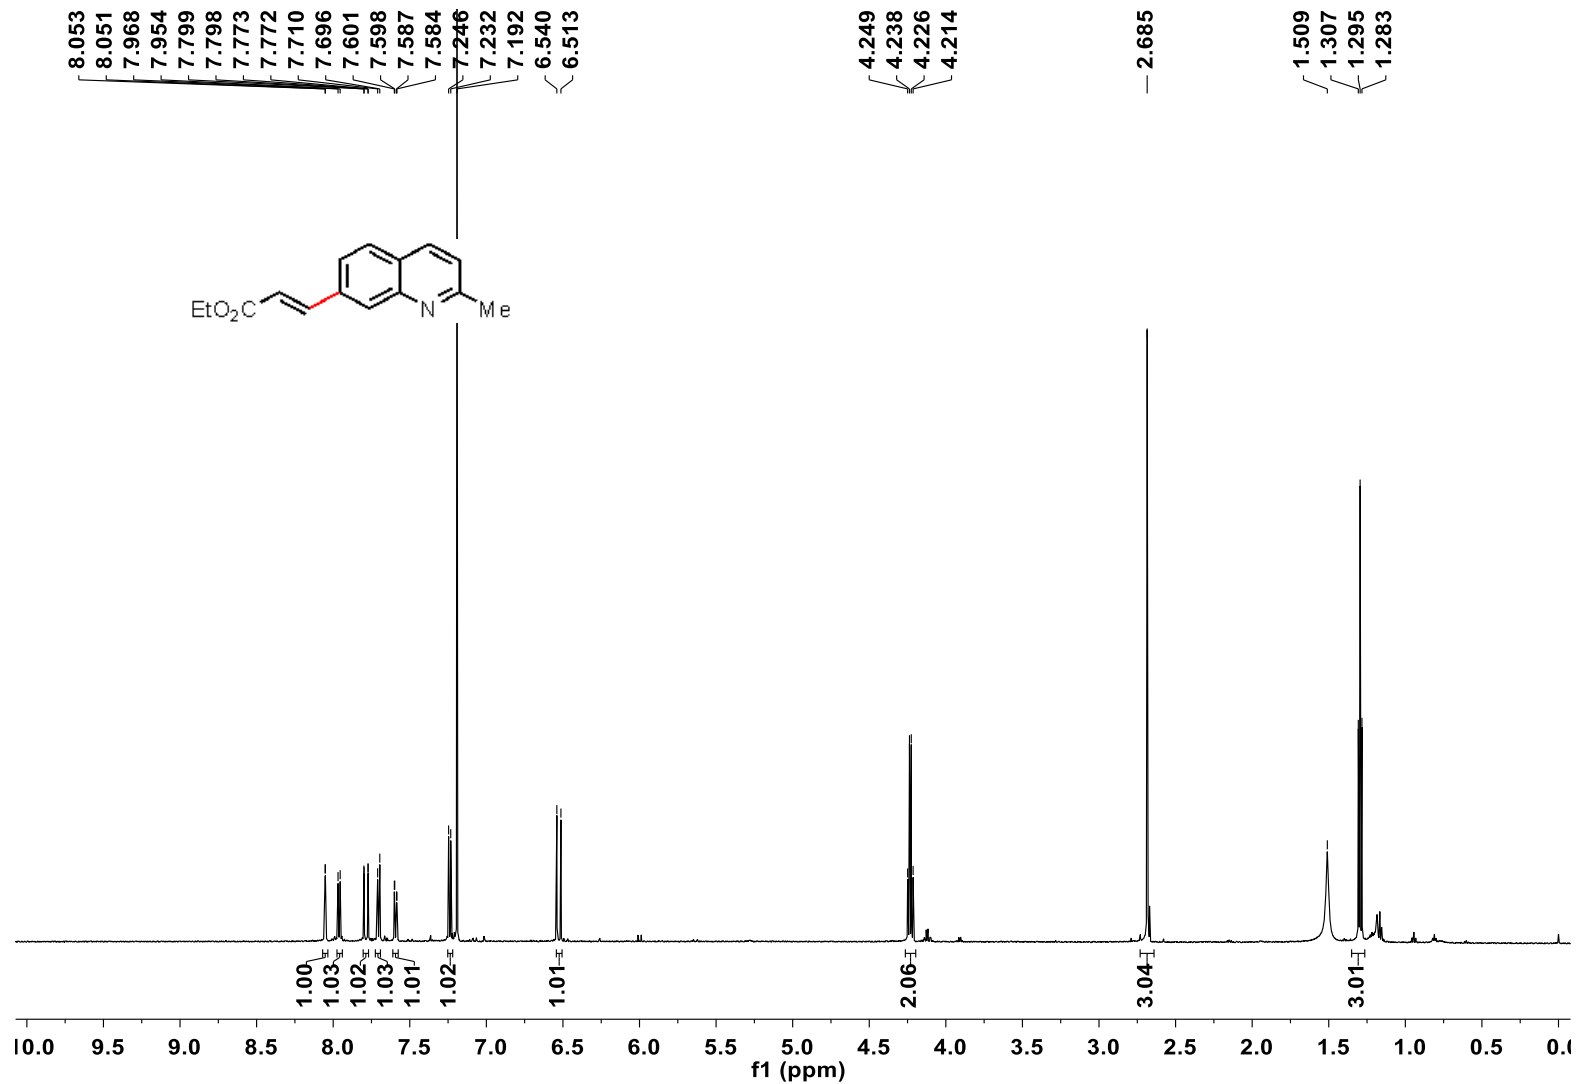

<sup>13</sup>C NMR (151 MHz, CDCl<sub>3</sub>) spectrum of **3I**

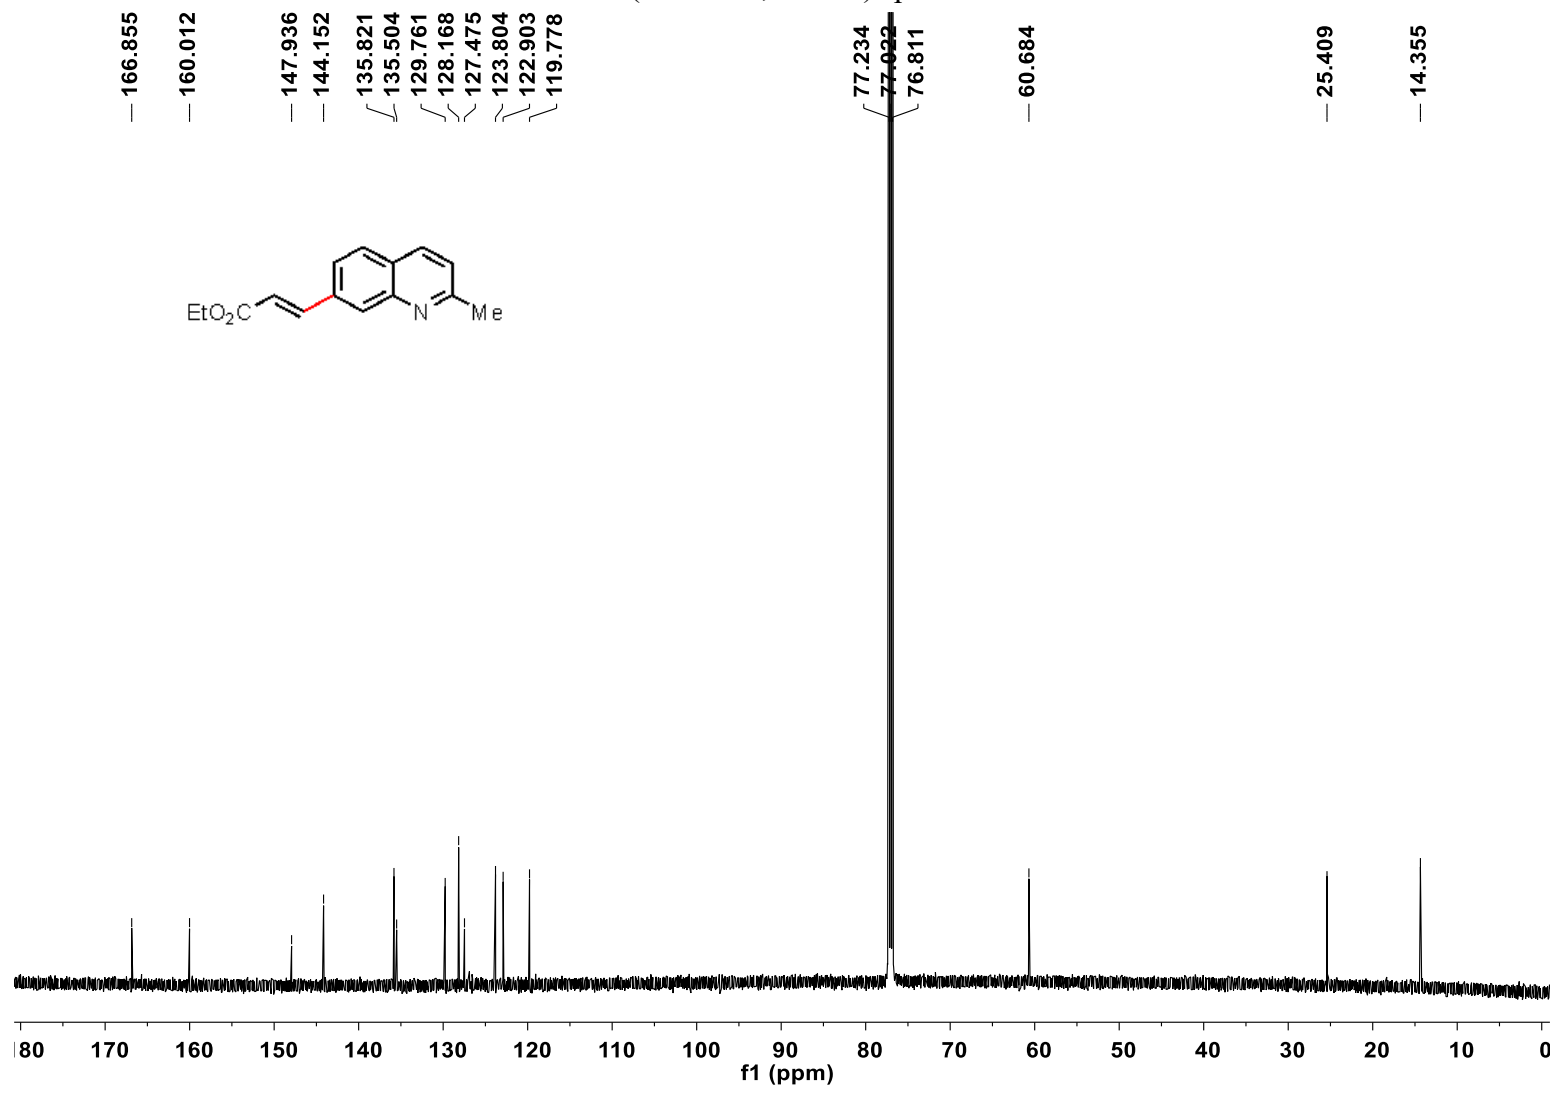

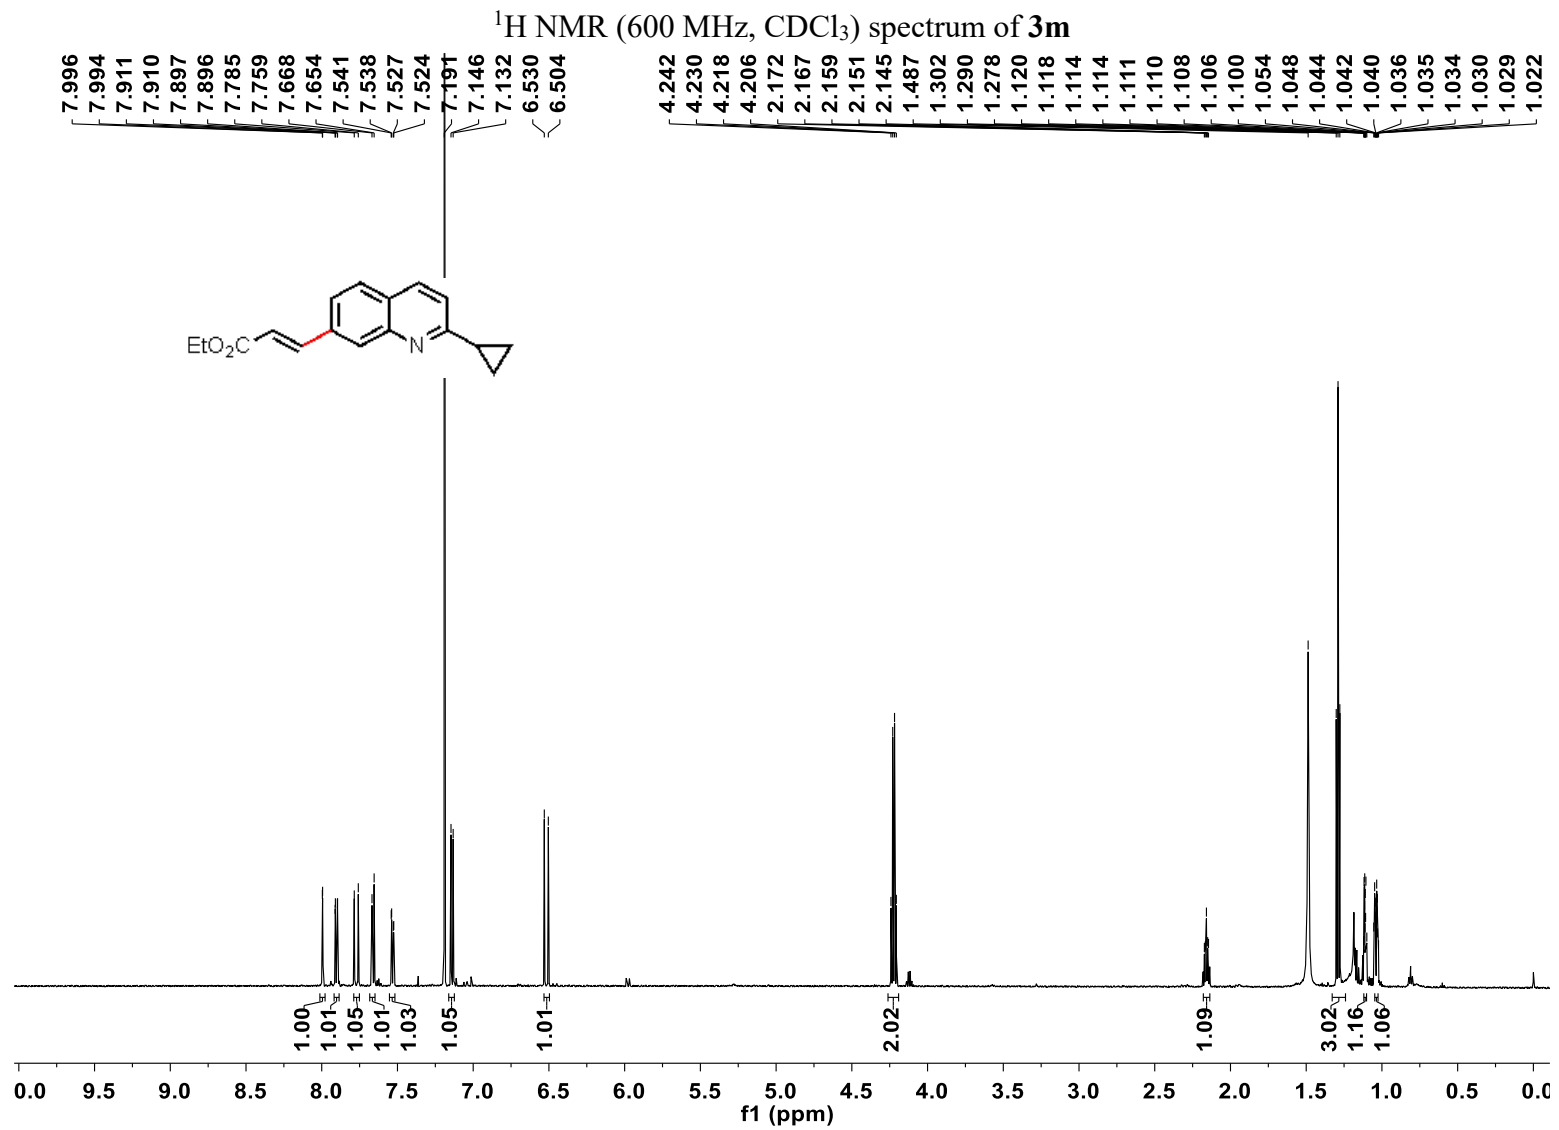



<sup>13</sup>C NMR (151 MHz, CDCl<sub>3</sub>) spectrum of **3m**

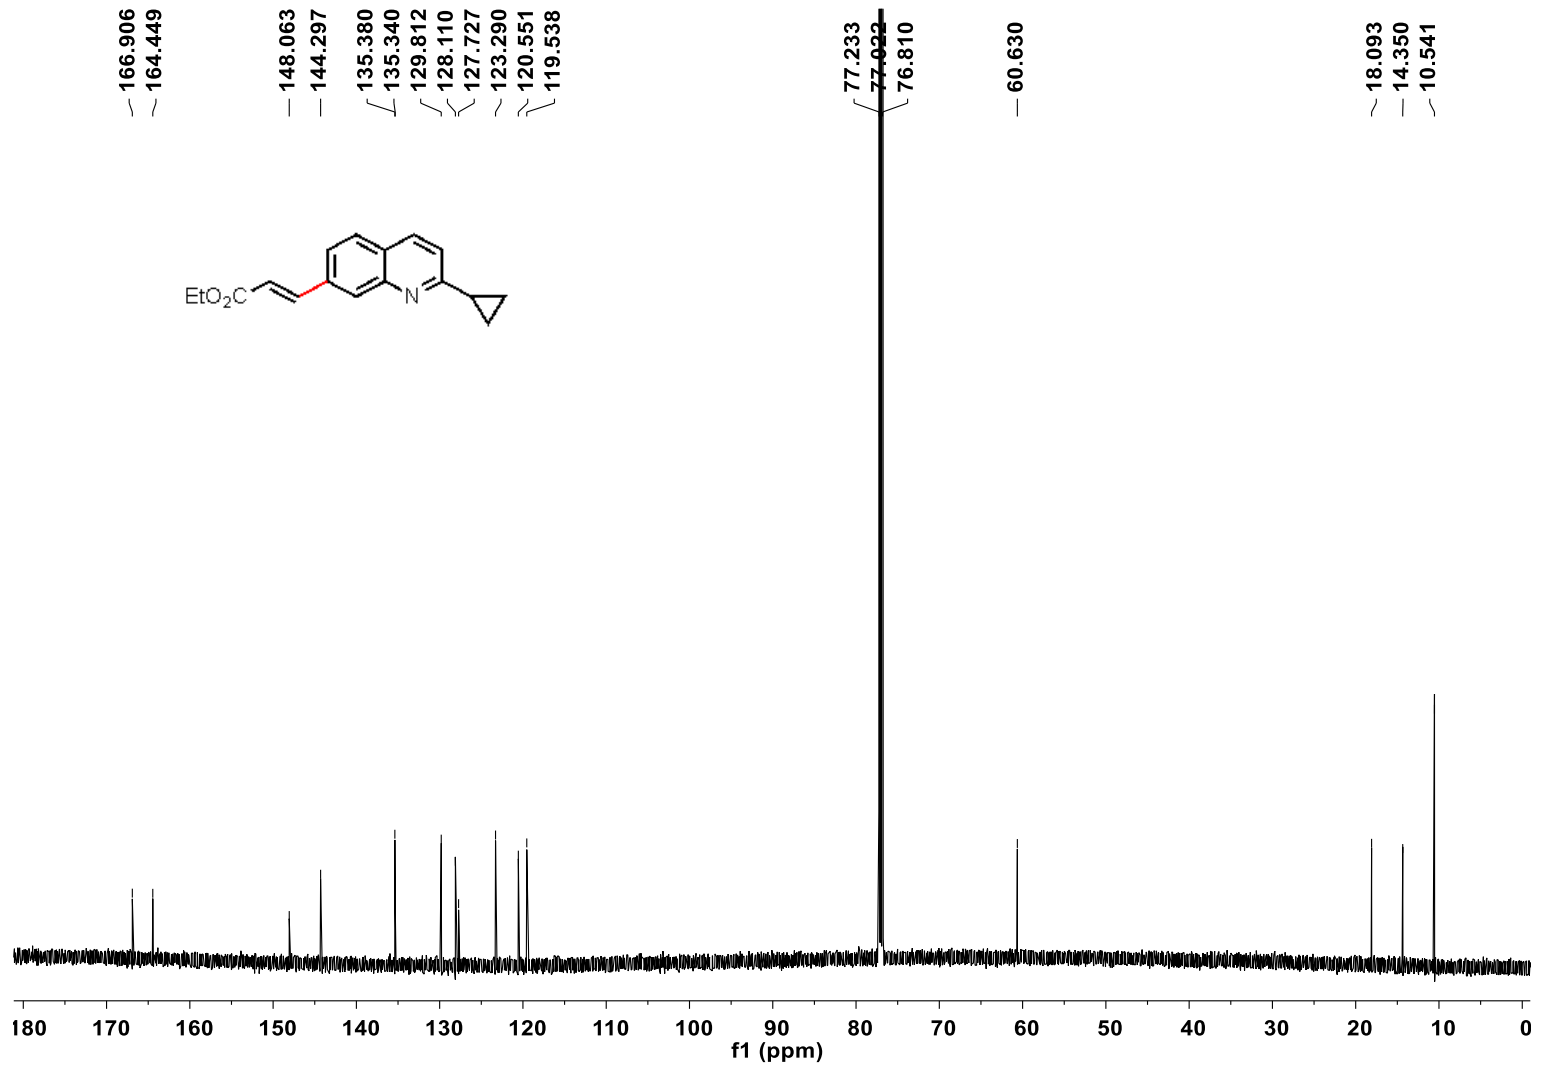

$^1\text{H}$  NMR (600 MHz,  $\text{CDCl}_3$ ) spectrum of **3n**

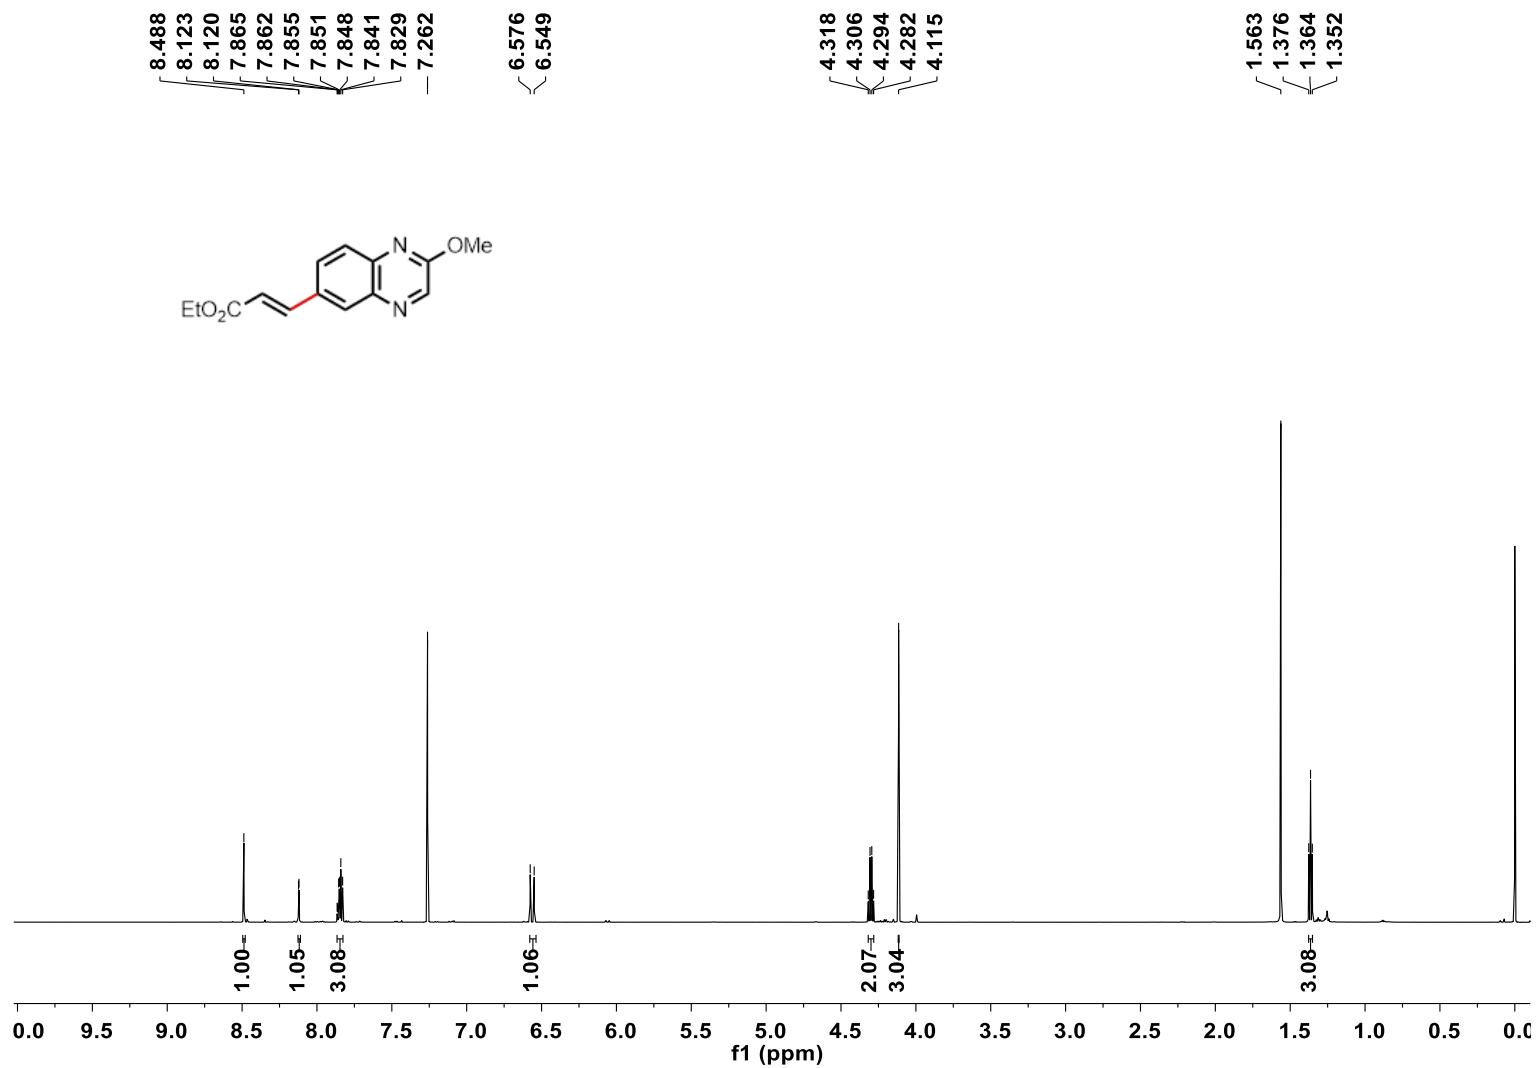

$^{13}\text{C}$  NMR (151 MHz,  $\text{CDCl}_3$ ) spectrum of **3n**

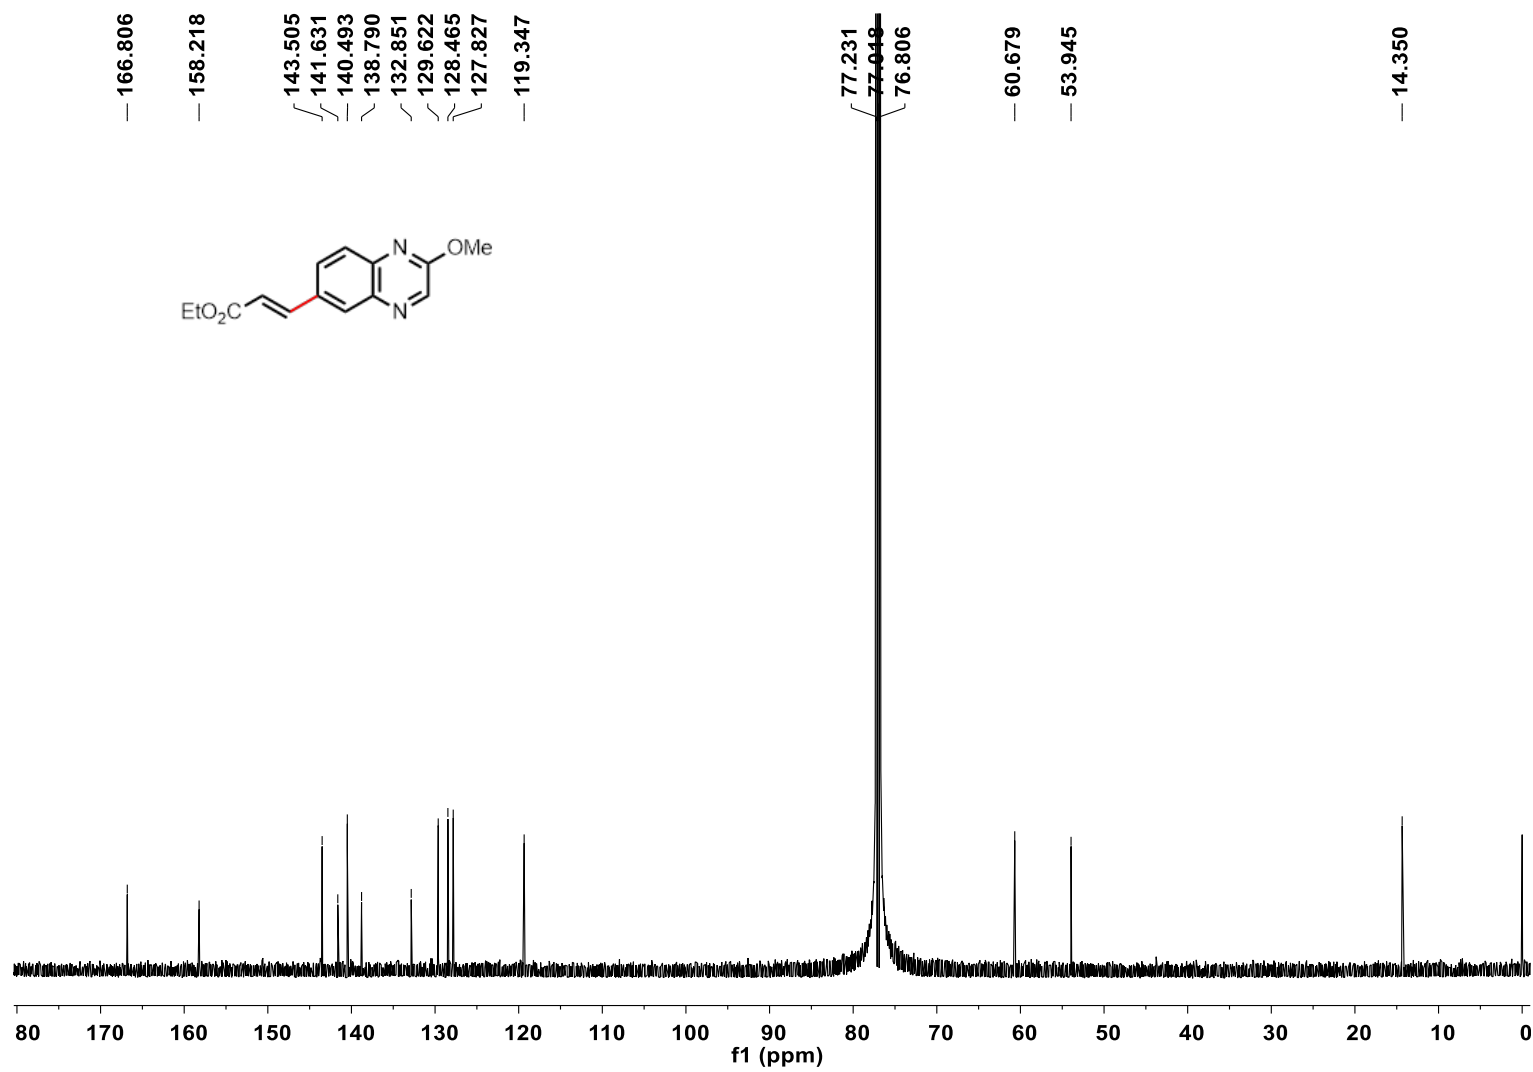

<sup>1</sup>H NMR (600 MHz, CDCl<sub>3</sub>) spectrum of **3o**

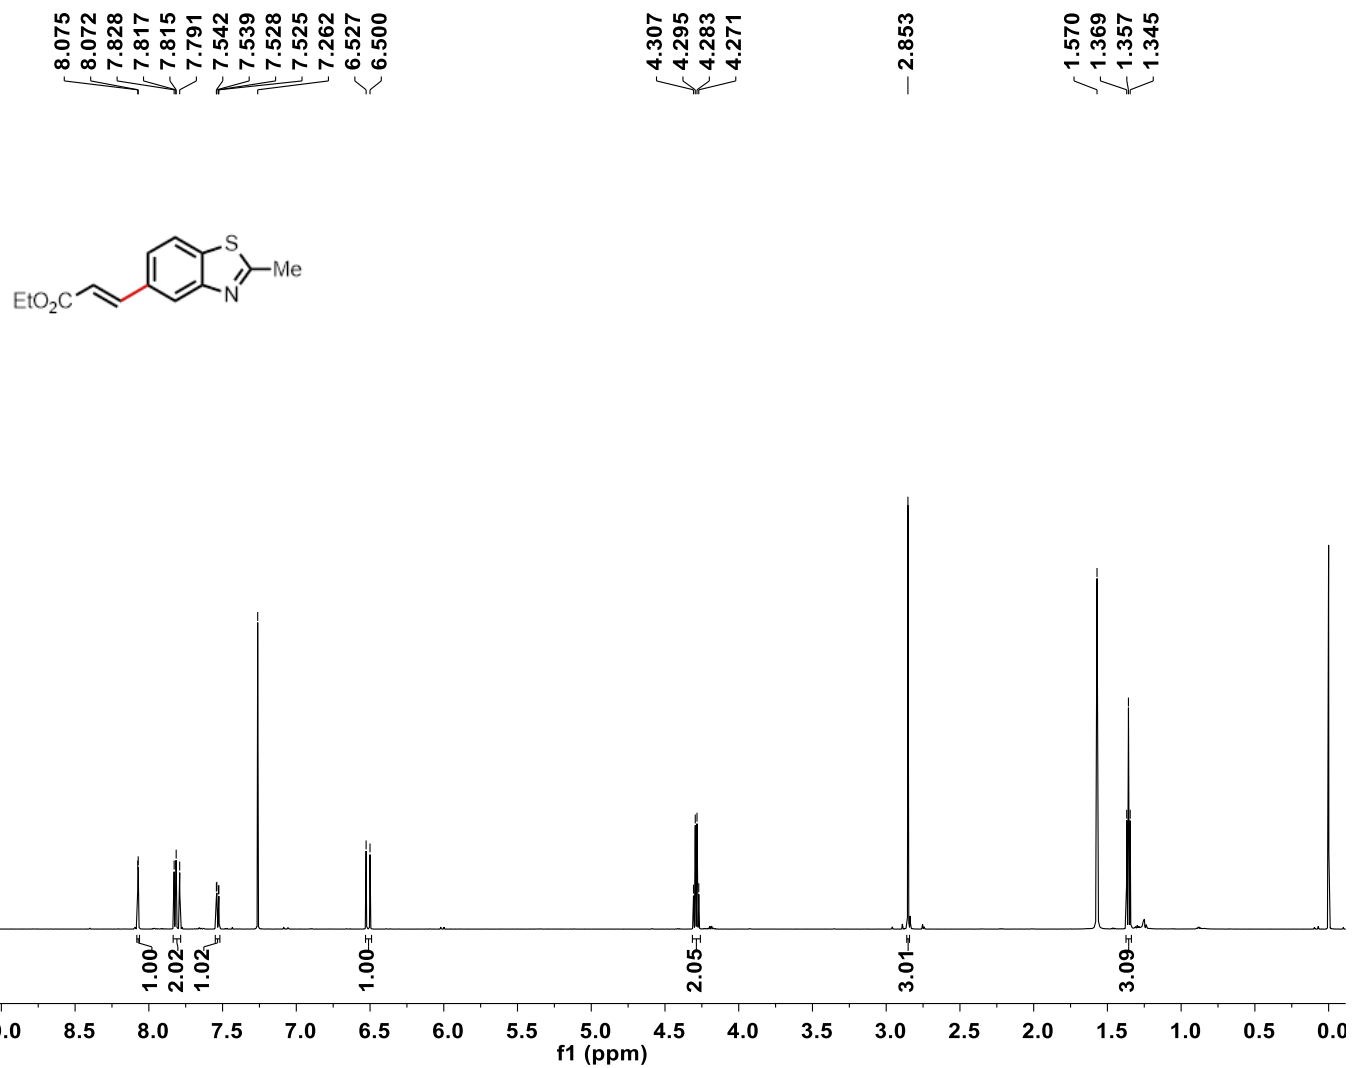

<sup>13</sup>C NMR (151 MHz, CDCl<sub>3</sub>) spectrum of **3o**

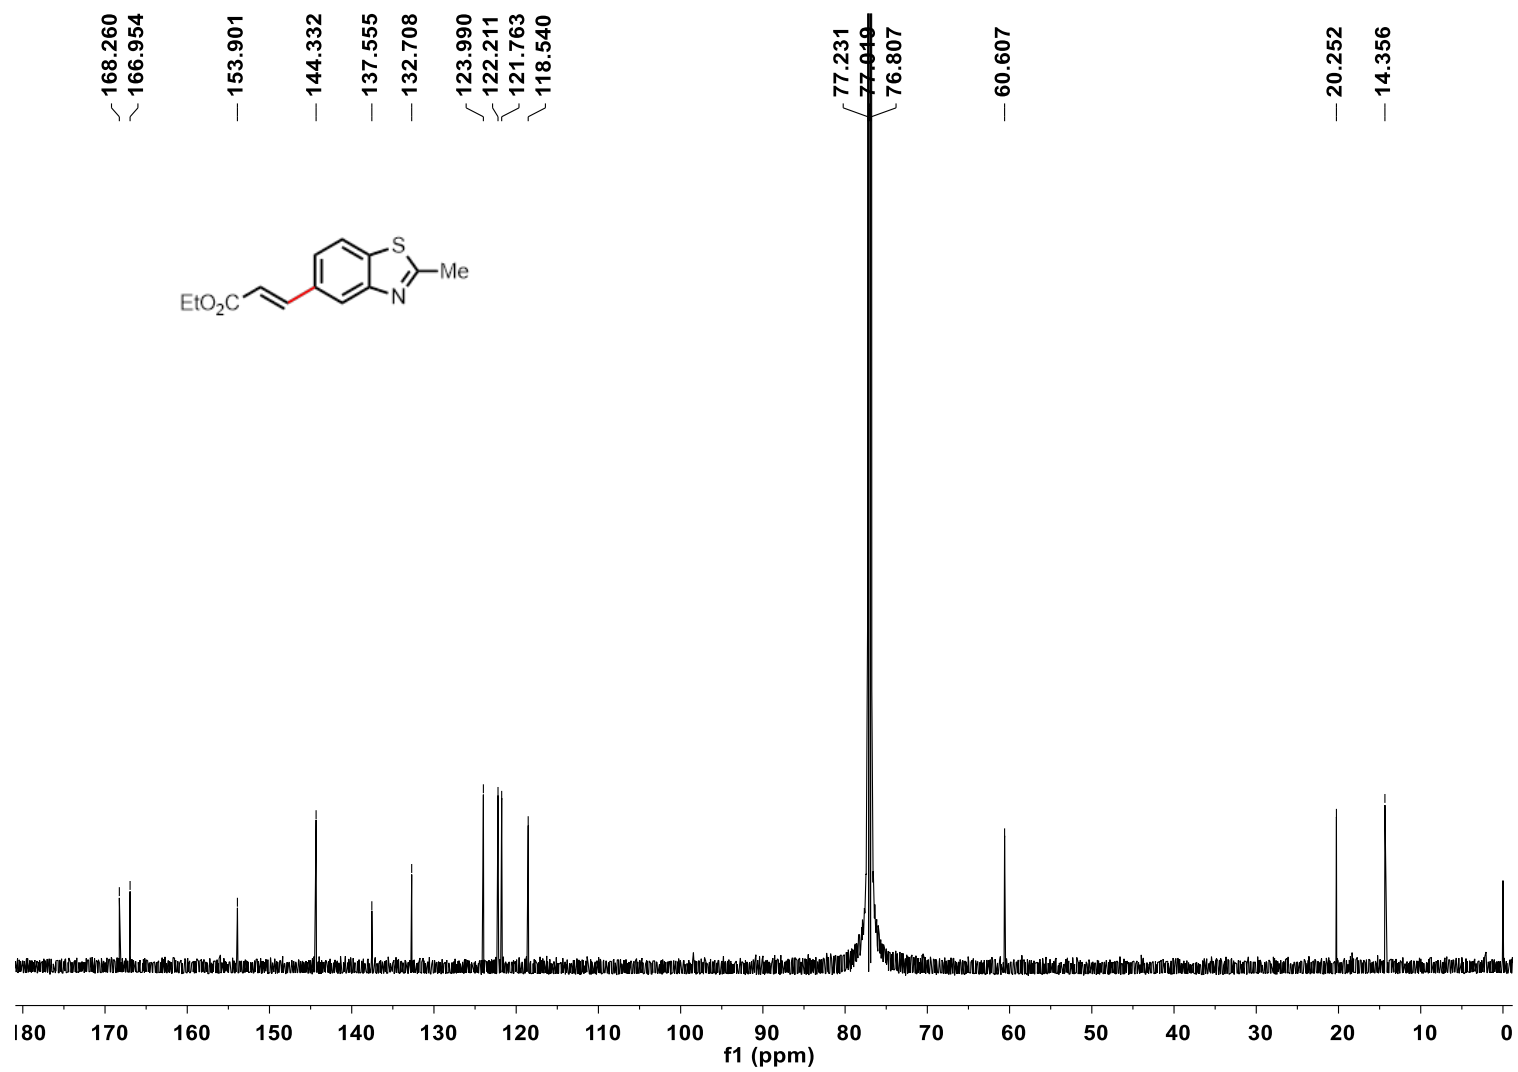

<sup>1</sup>H NMR (600 MHz, CDCl<sub>3</sub>) spectrum of **3p**

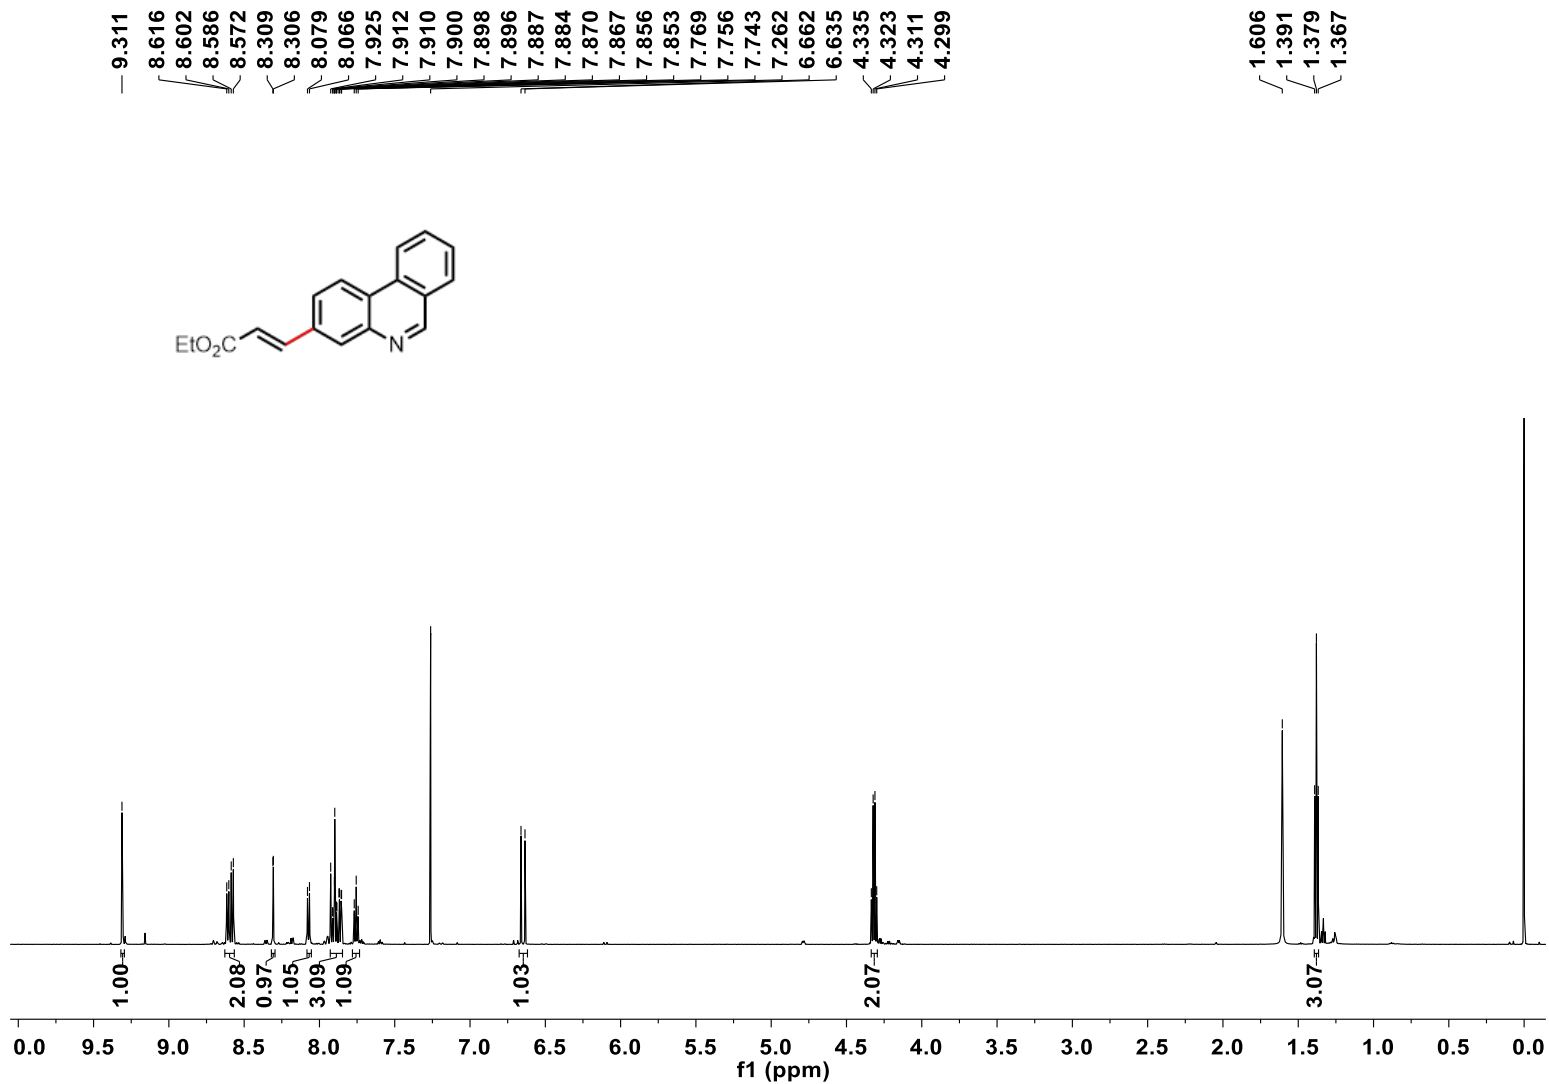

<sup>13</sup>C NMR (151 MHz, CDCl<sub>3</sub>) spectrum of **3p**

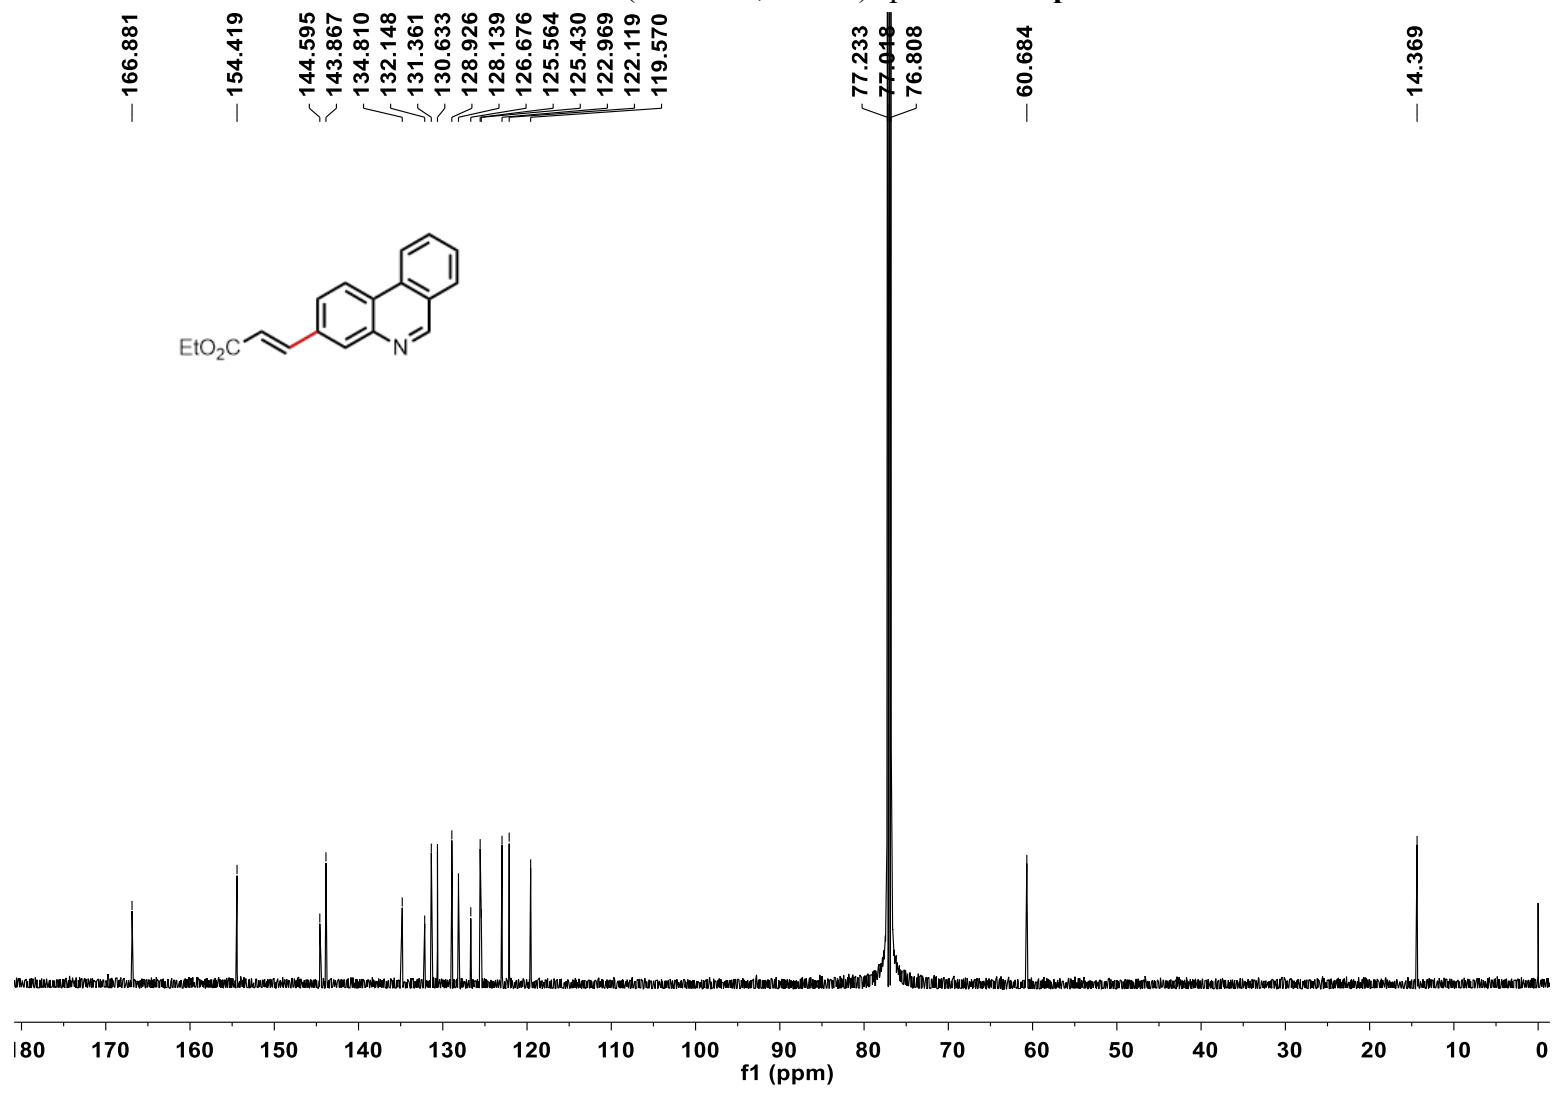

<sup>1</sup>H NMR (600 MHz, CDCl<sub>3</sub>) spectrum of **3q**

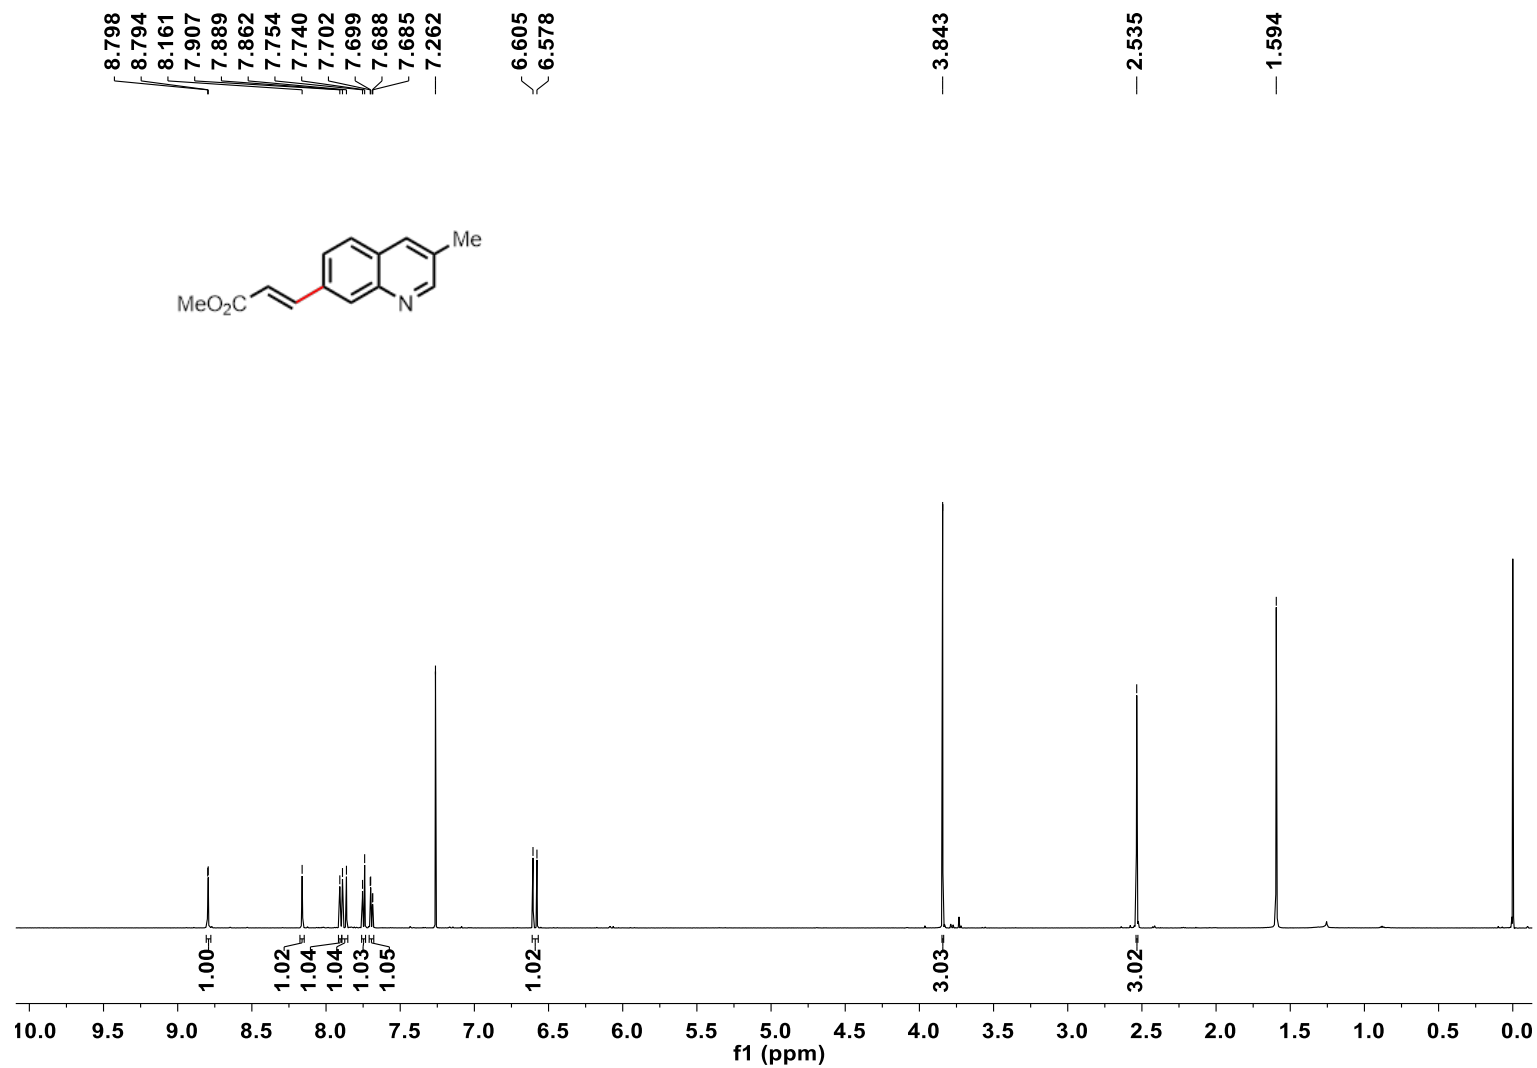



$^{13}\text{C}$  NMR (151 MHz,  $\text{CDCl}_3$ ) spectrum of **3q**

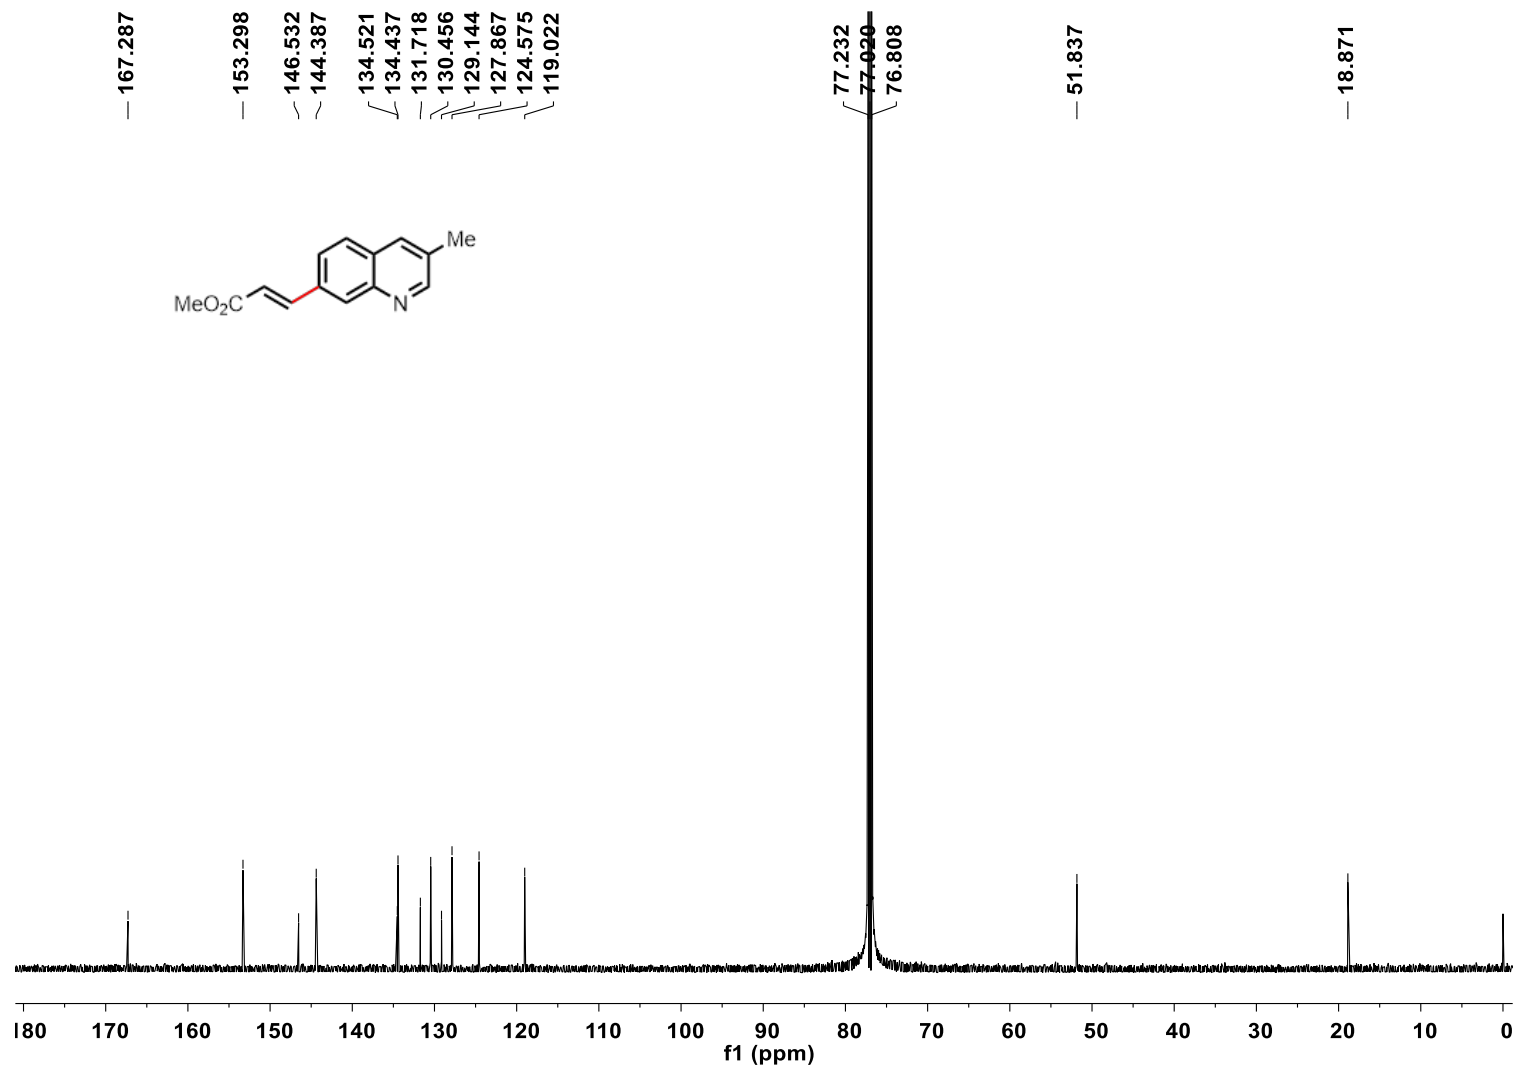

<sup>1</sup>H NMR (600 MHz, CDCl<sub>3</sub>) spectrum of **3r**

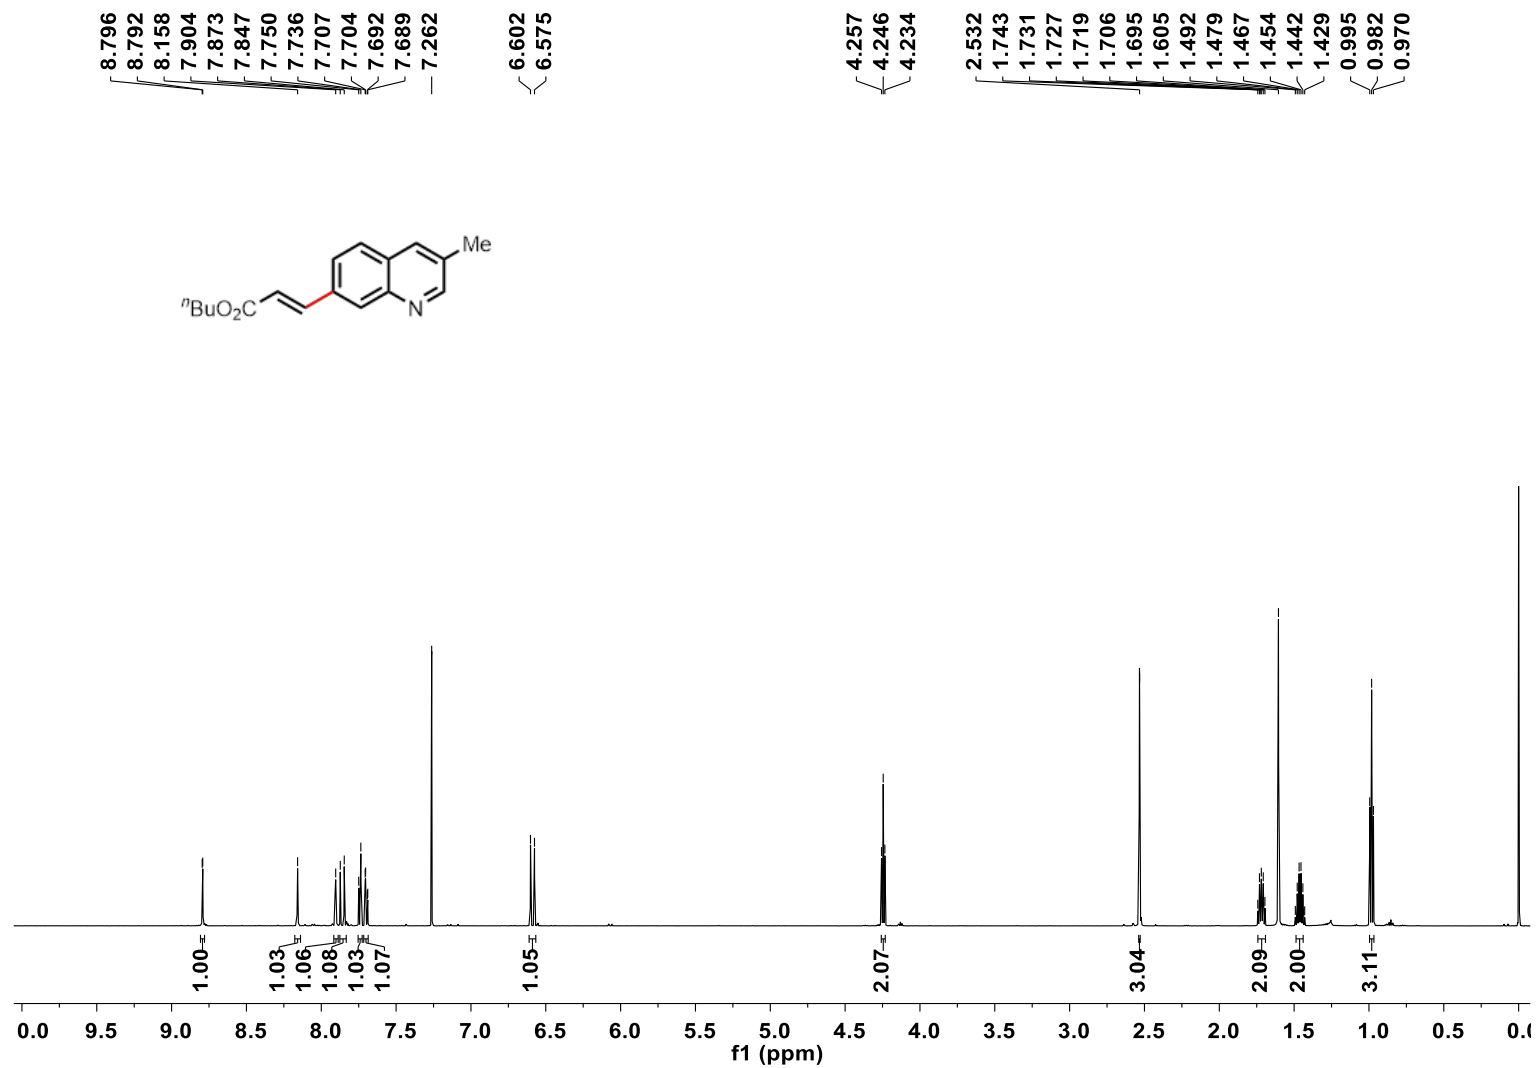

$^{13}\text{C}$  NMR (151 MHz,  $\text{CDCl}_3$ ) spectrum of **3r**

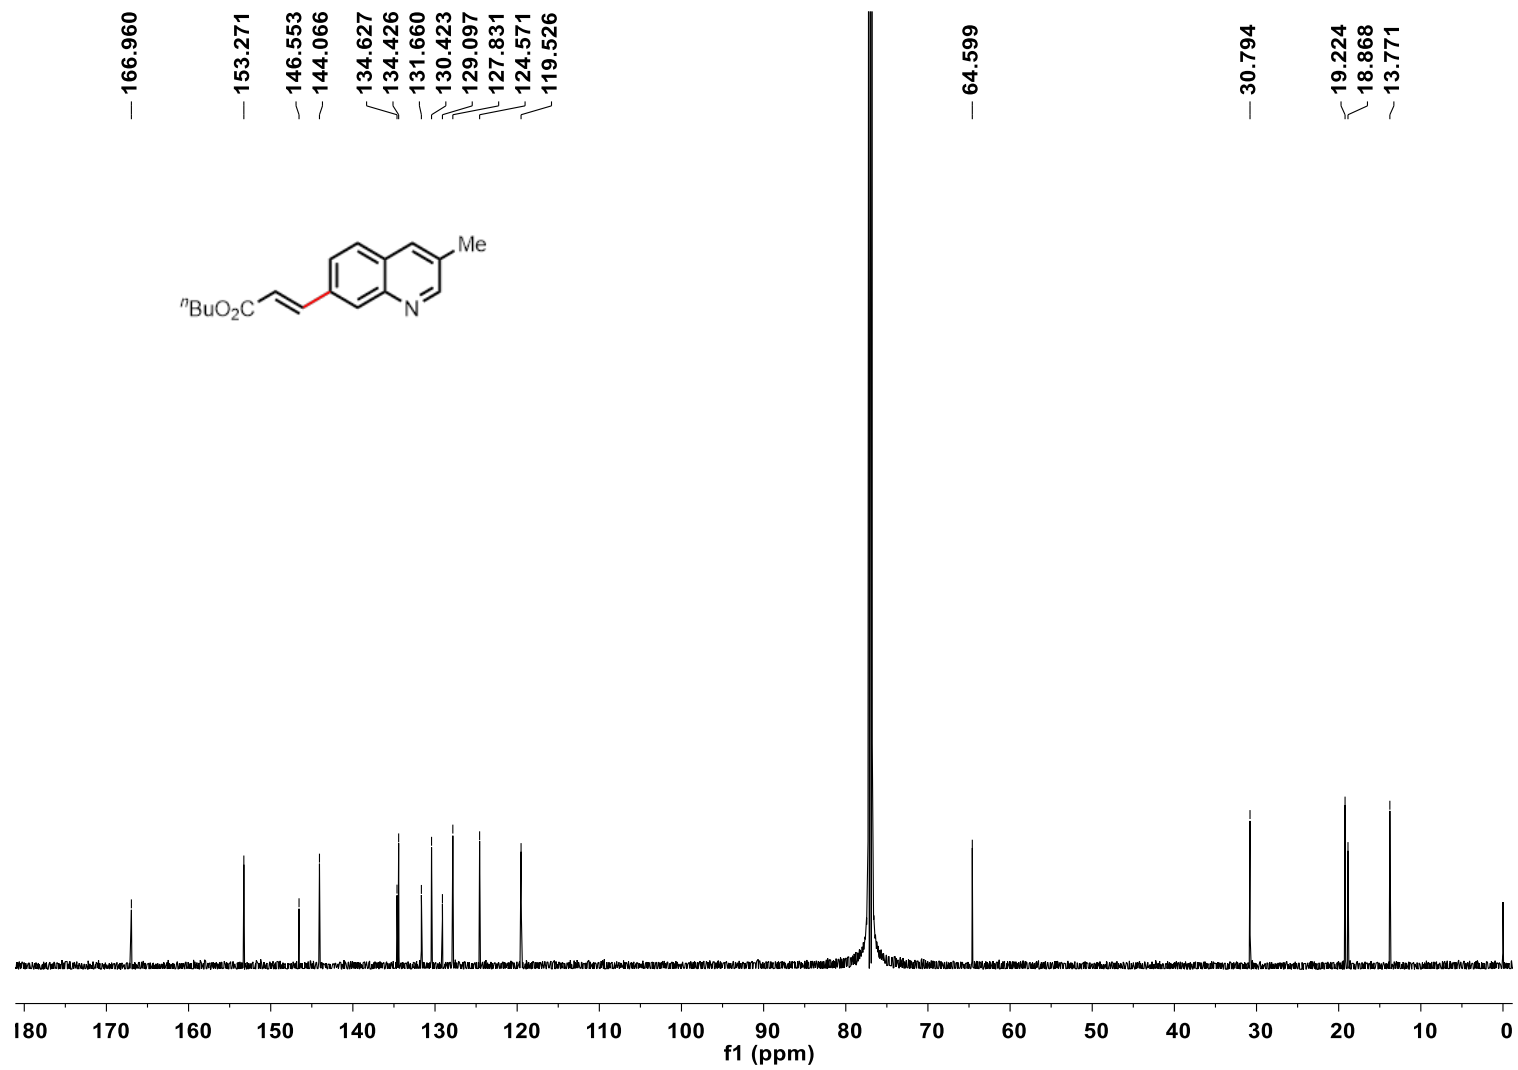

<sup>1</sup>H NMR (600 MHz, CDCl<sub>3</sub>) spectrum of **3s**

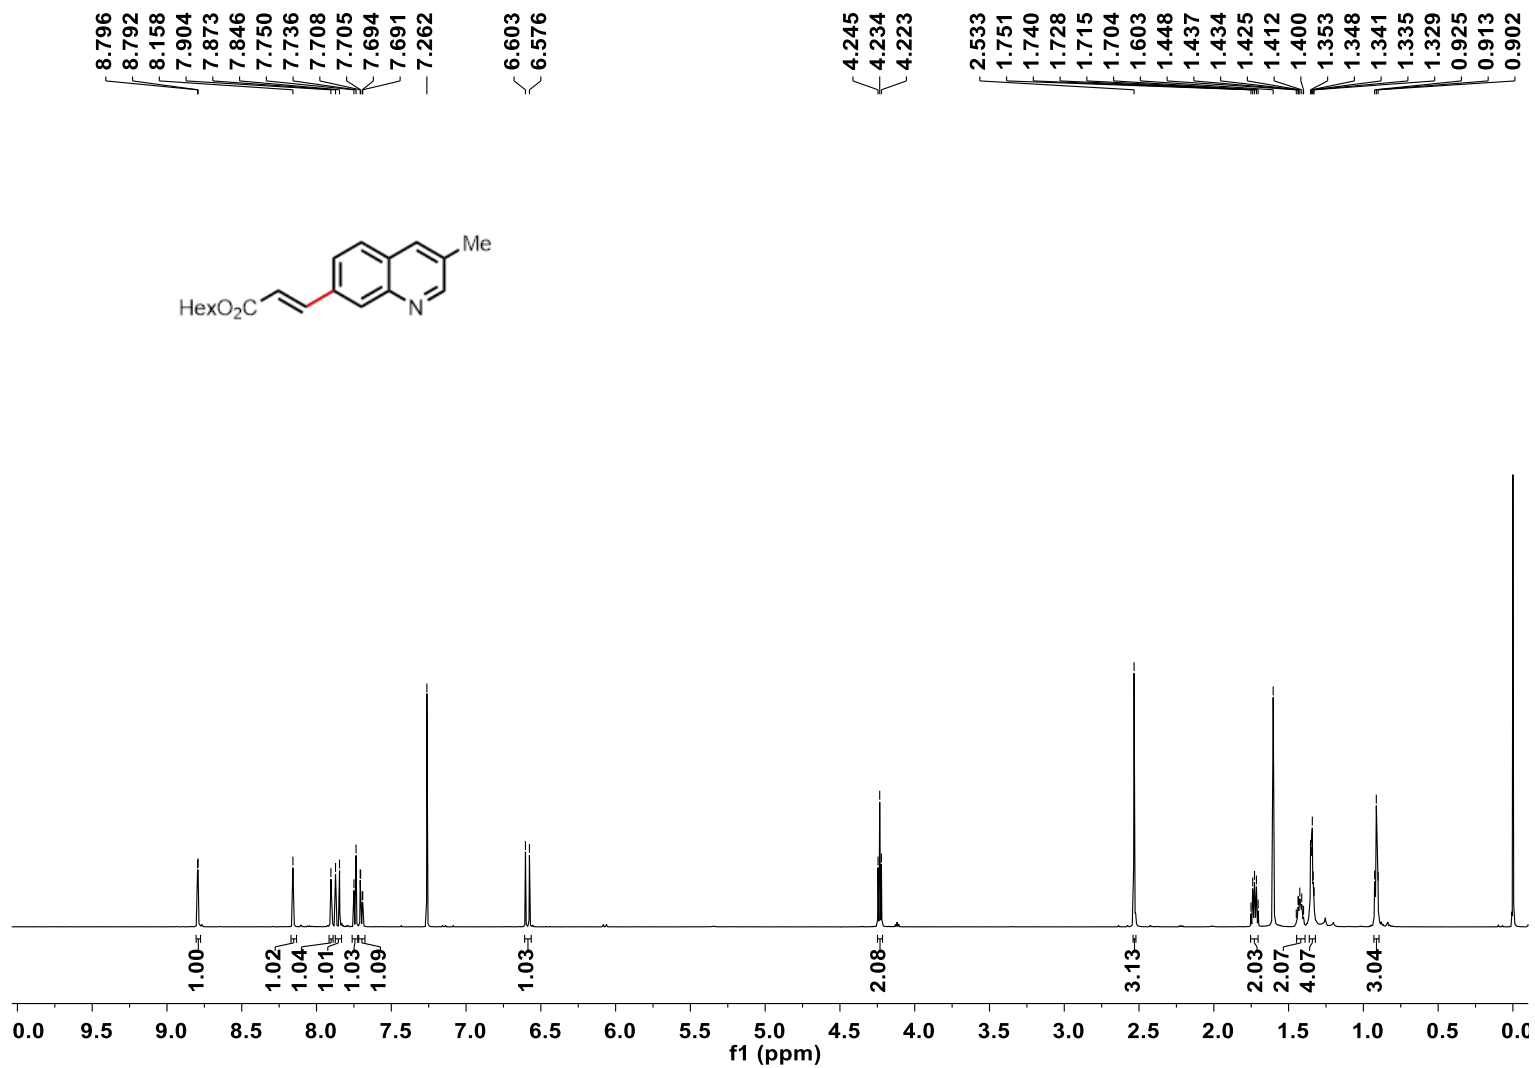

$^{13}\text{C}$  NMR (151 MHz,  $\text{CDCl}_3$ ) spectrum of **3s**

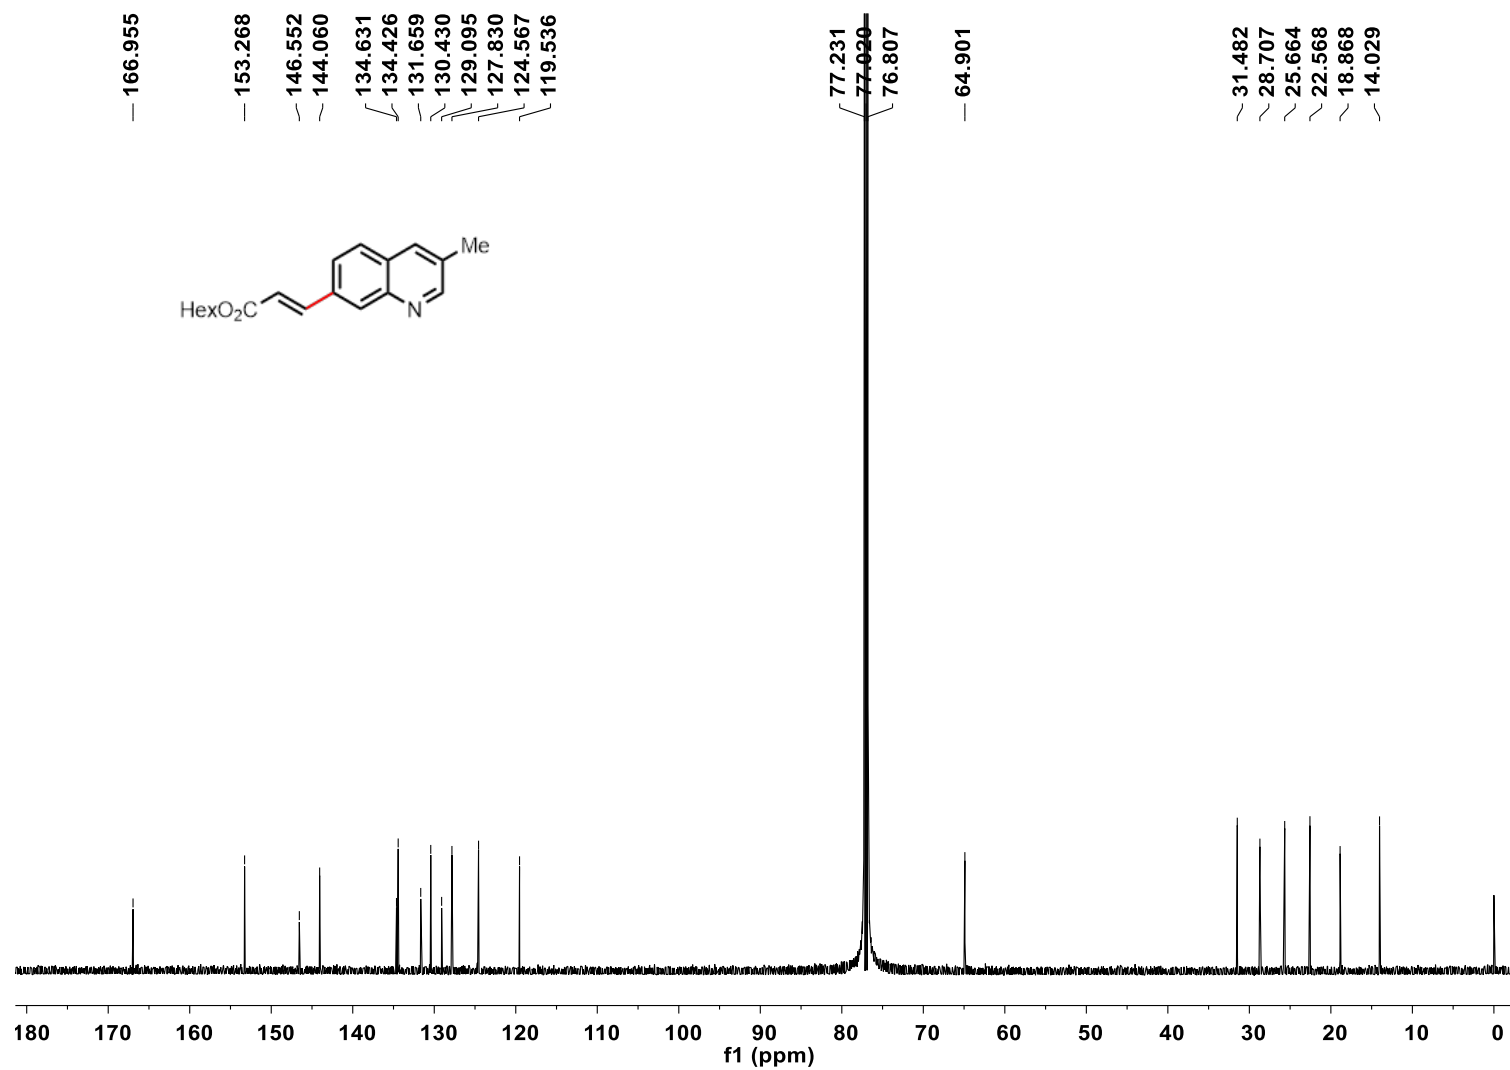

<sup>1</sup>H NMR (600 MHz, CDCl<sub>3</sub>) spectrum of **3t**

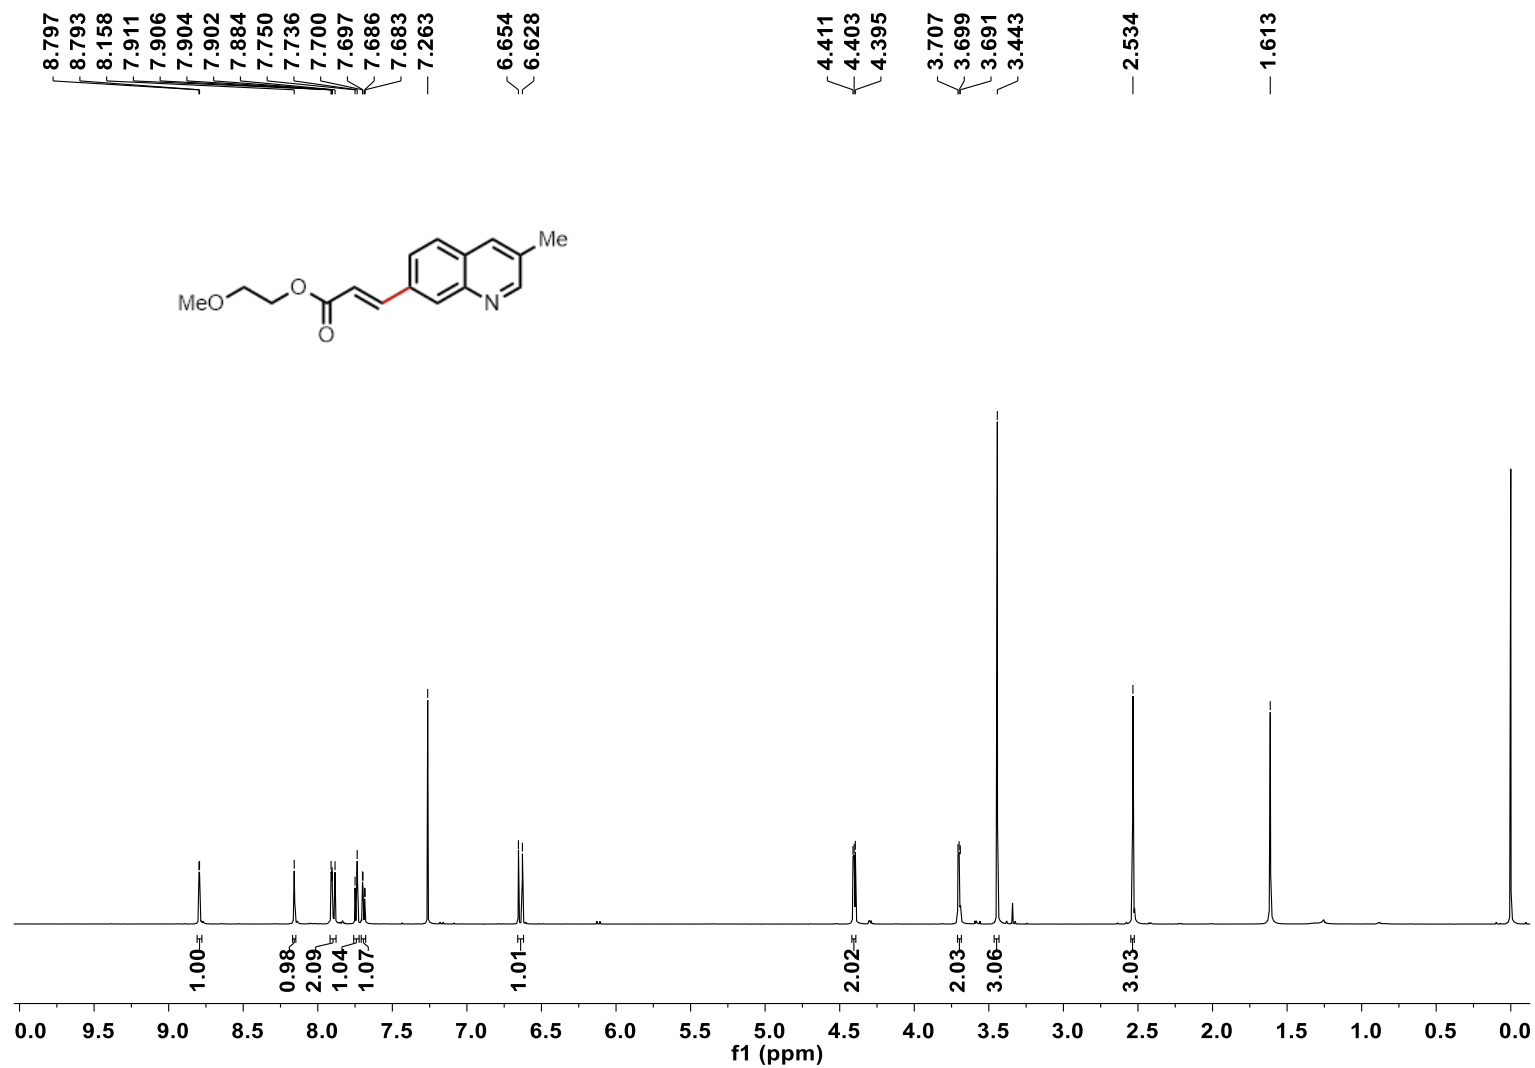

<sup>13</sup>C NMR (151 MHz, CDCl<sub>3</sub>) spectrum of 3t

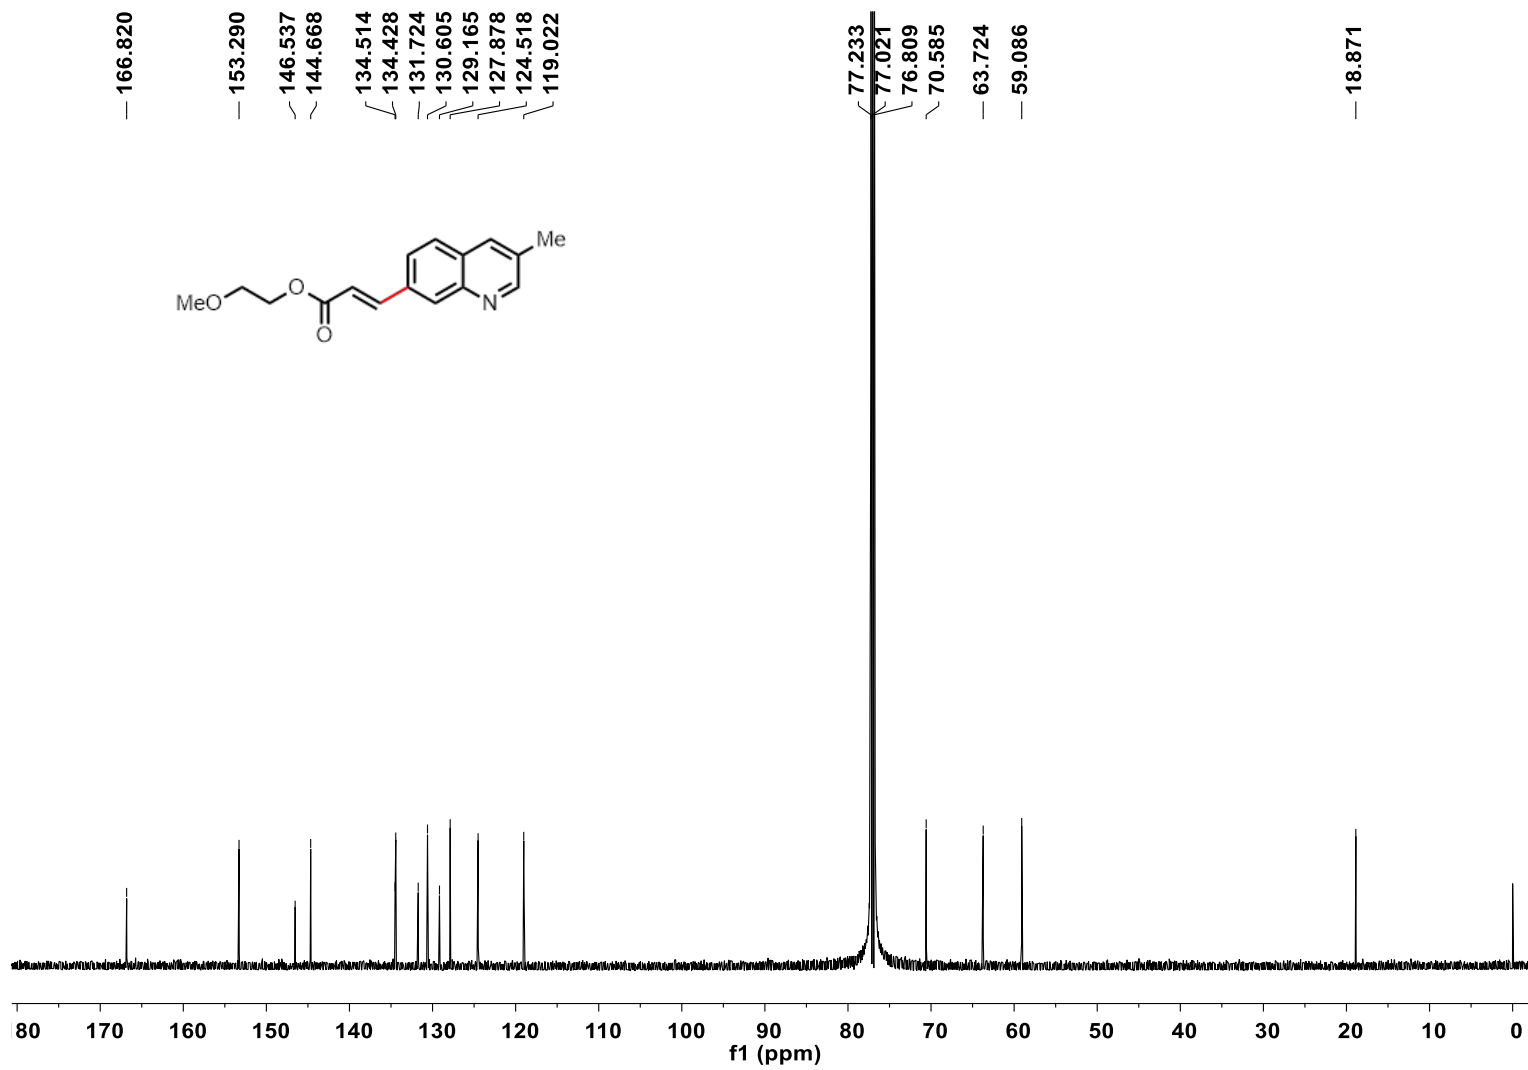

$^1\text{H}$  NMR (600 MHz,  $\text{CDCl}_3$ ) spectrum of **3u**

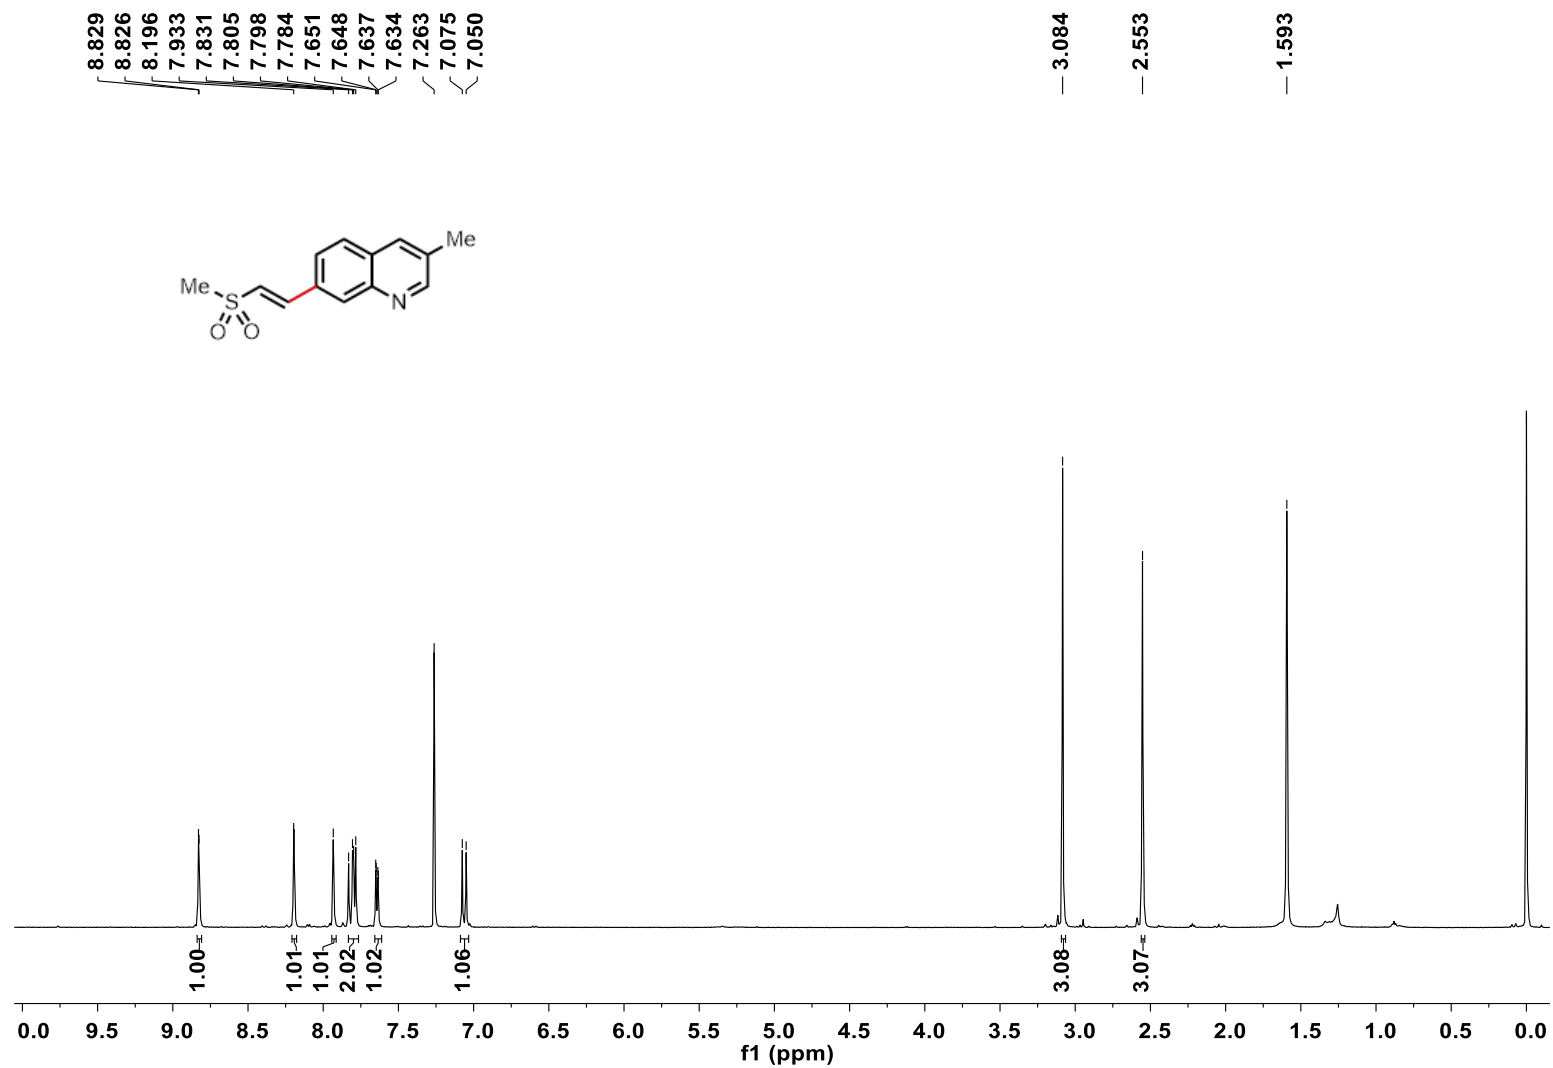



$^{13}\text{C}$  NMR (151 MHz,  $\text{CDCl}_3$ ) spectrum of **3u**

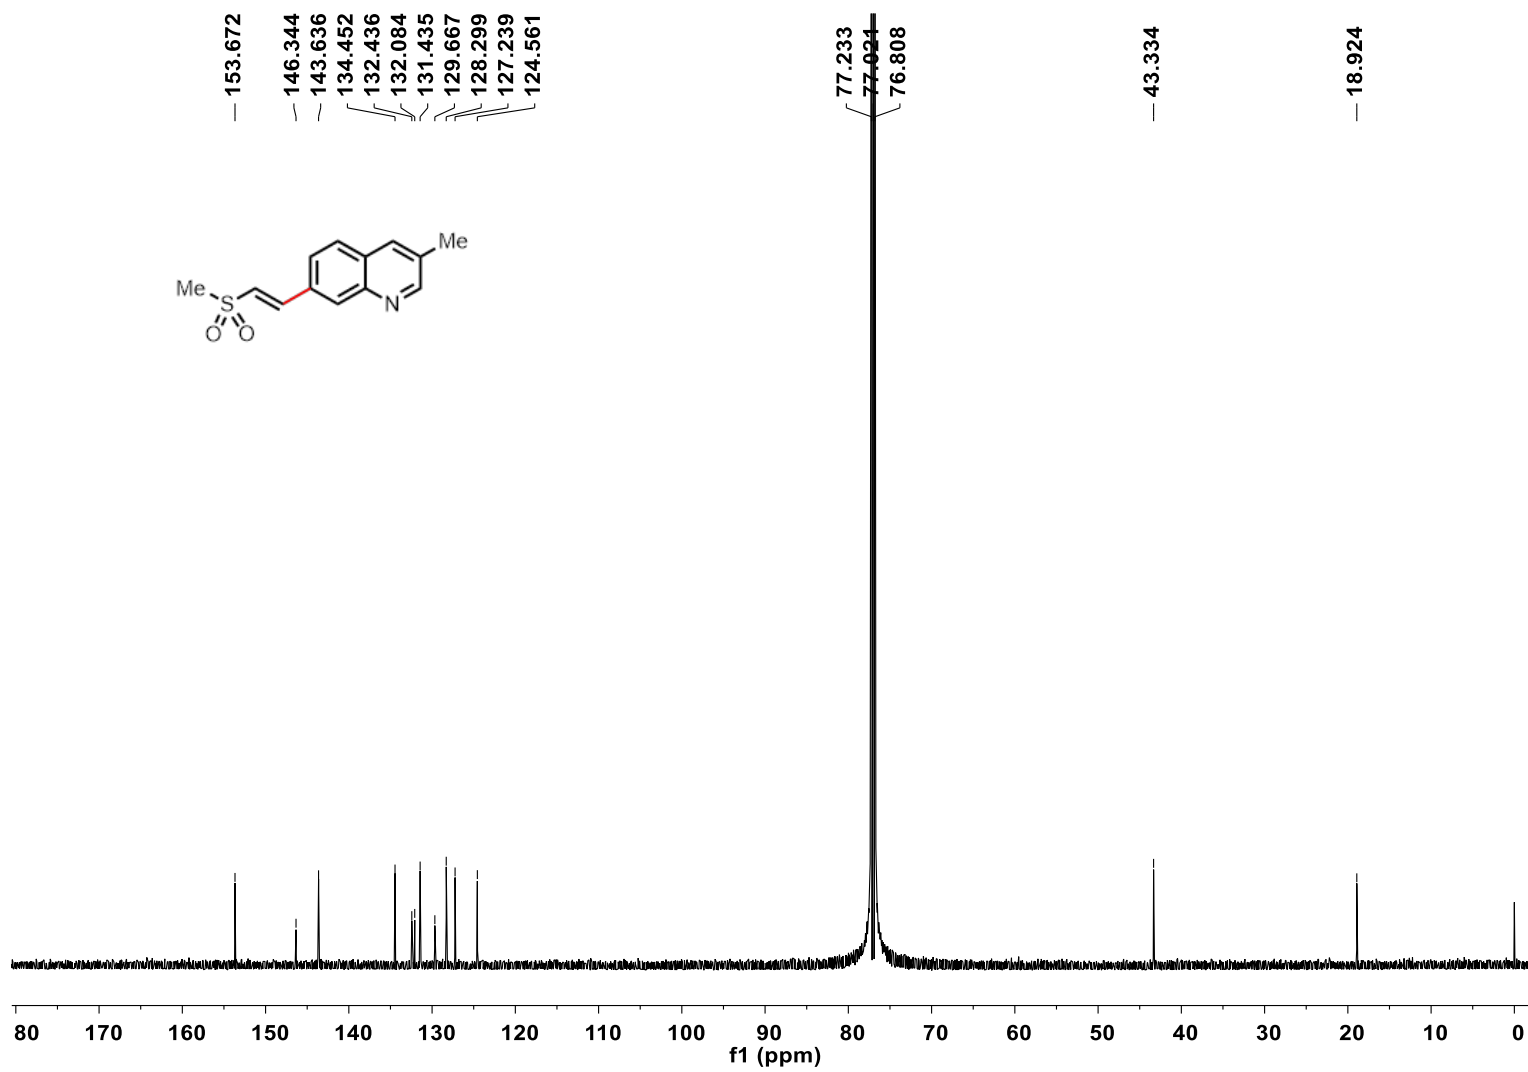

<sup>1</sup>H NMR (600 MHz, CDCl<sub>3</sub>) spectrum of **3v**

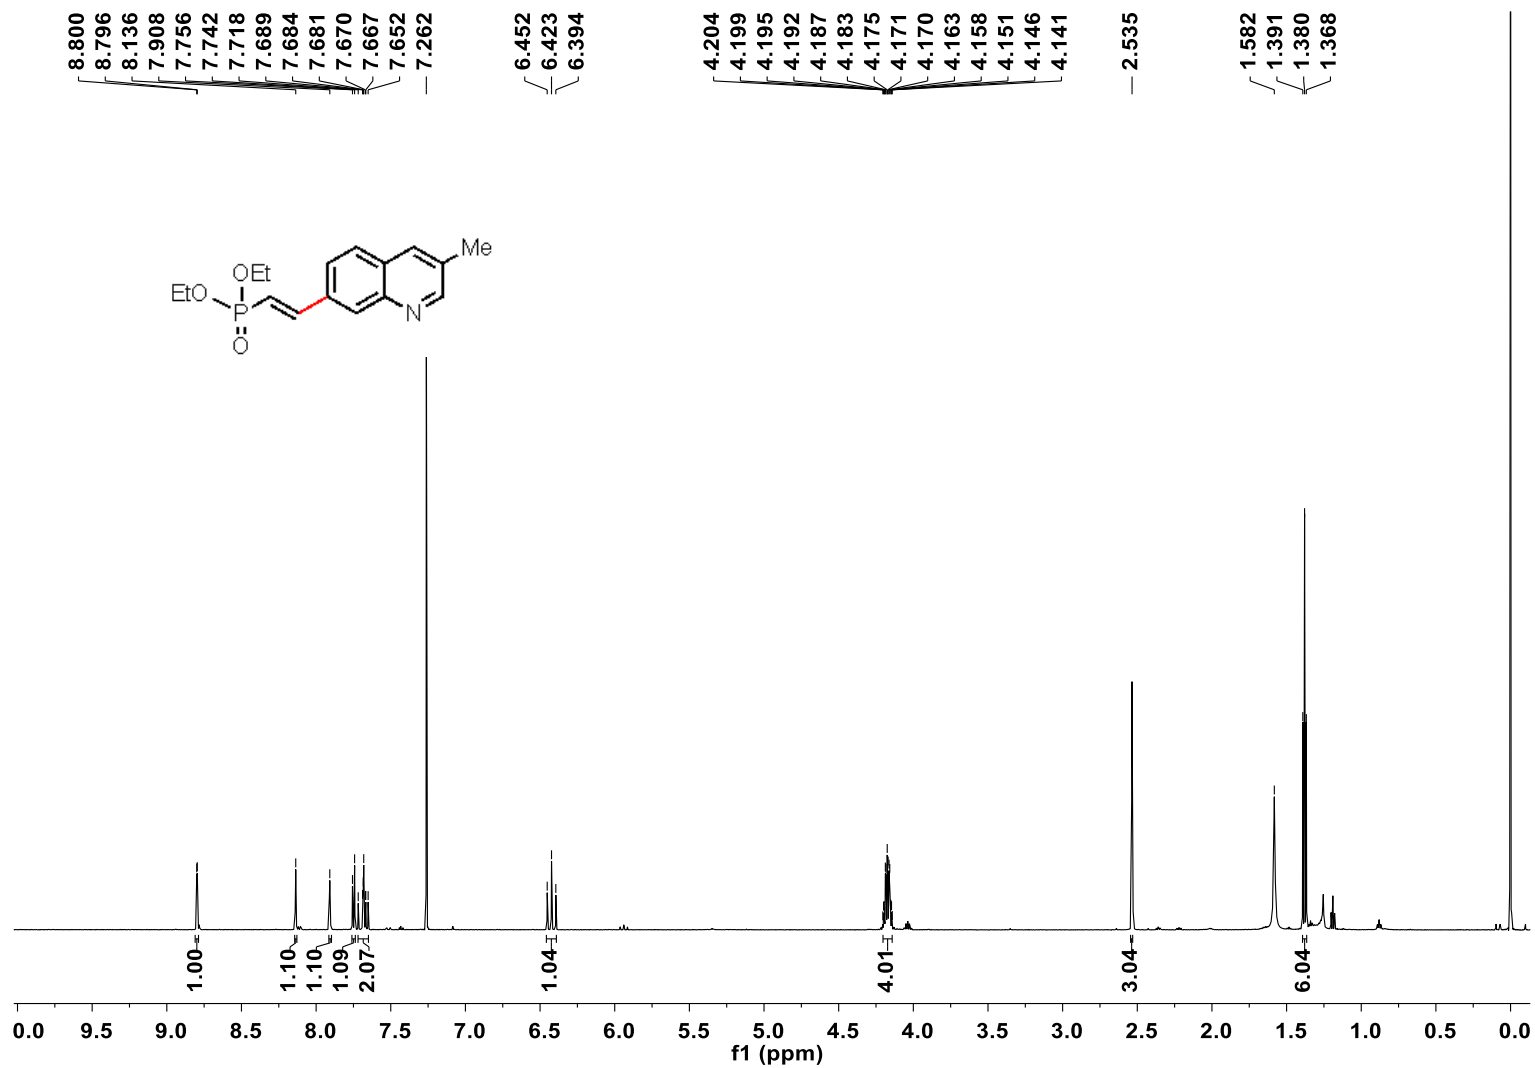

<sup>13</sup>C NMR (151 MHz, CDCl<sub>3</sub>) spectrum of **3v**

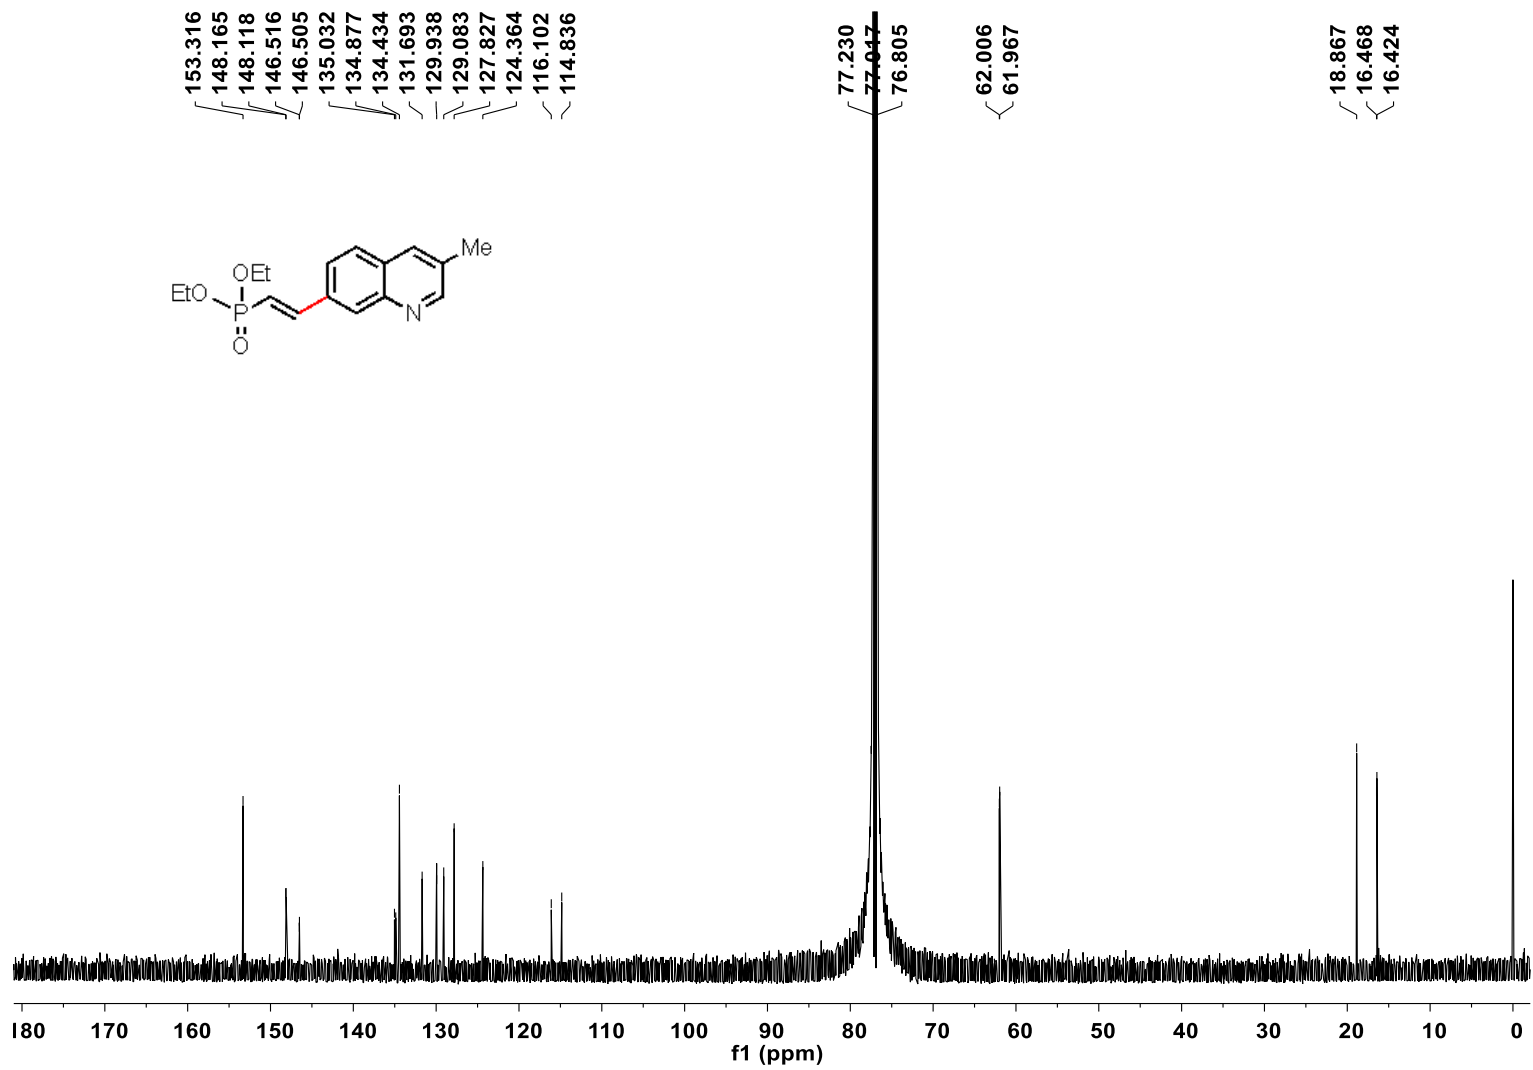

<sup>1</sup>H NMR (600 MHz, CDCl<sub>3</sub>) spectrum of **3w**

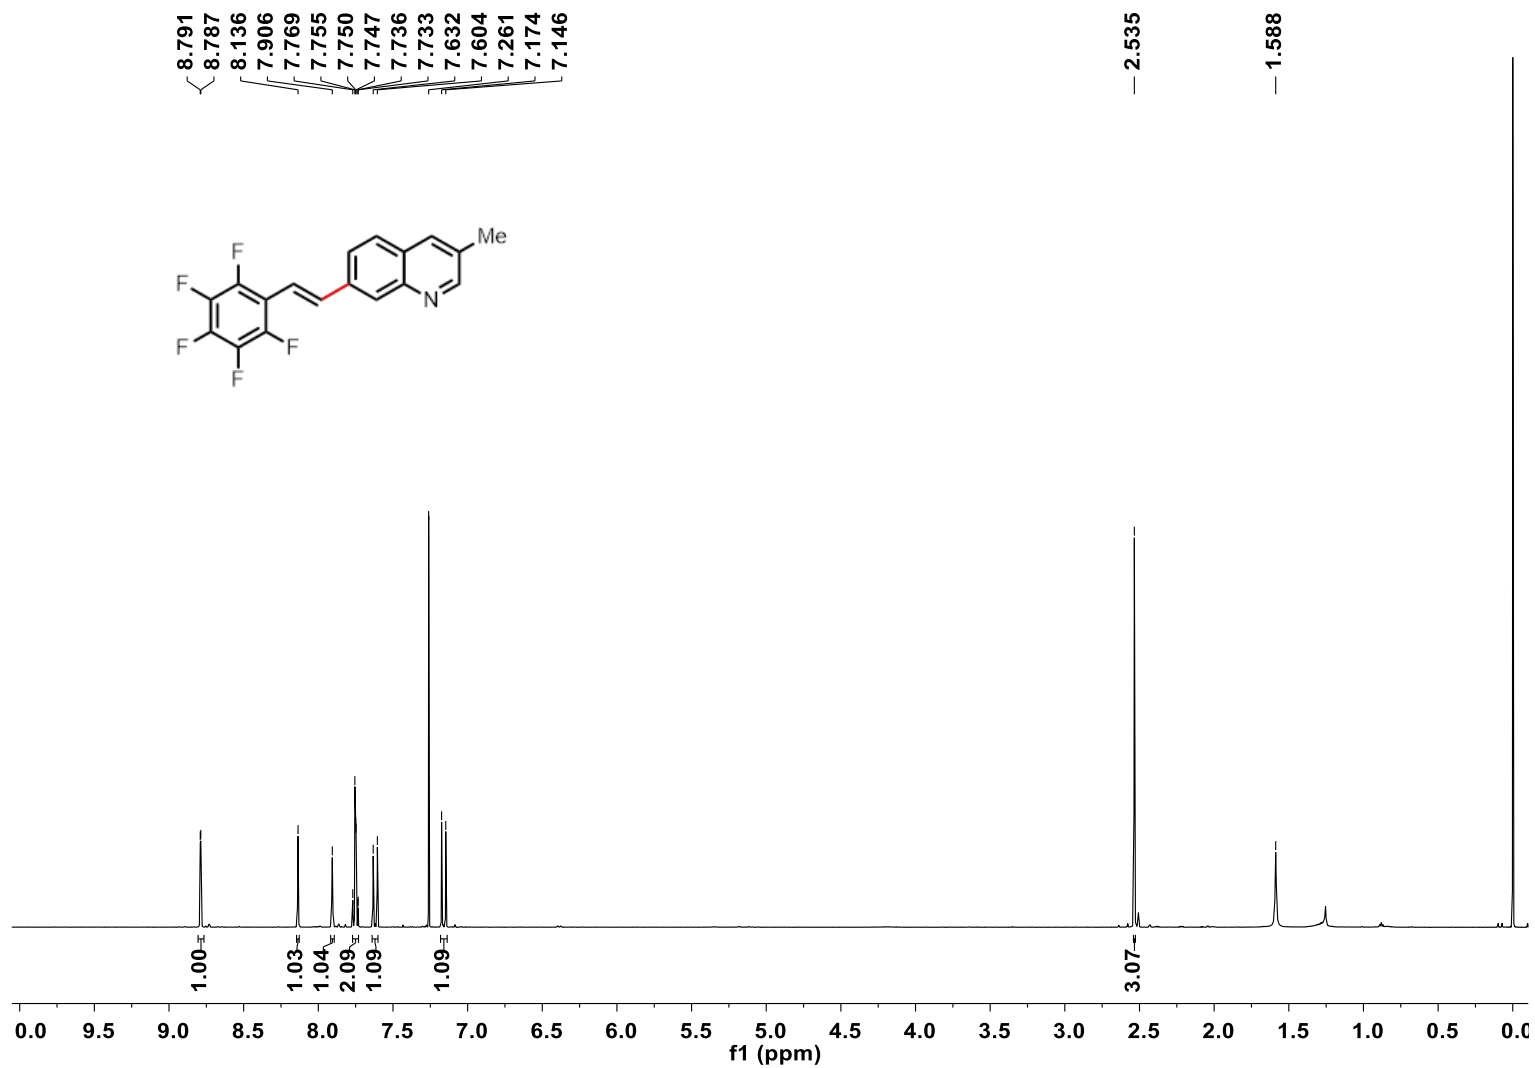

<sup>13</sup>C NMR (151 MHz, CDCl<sub>3</sub>) spectrum of **3w**

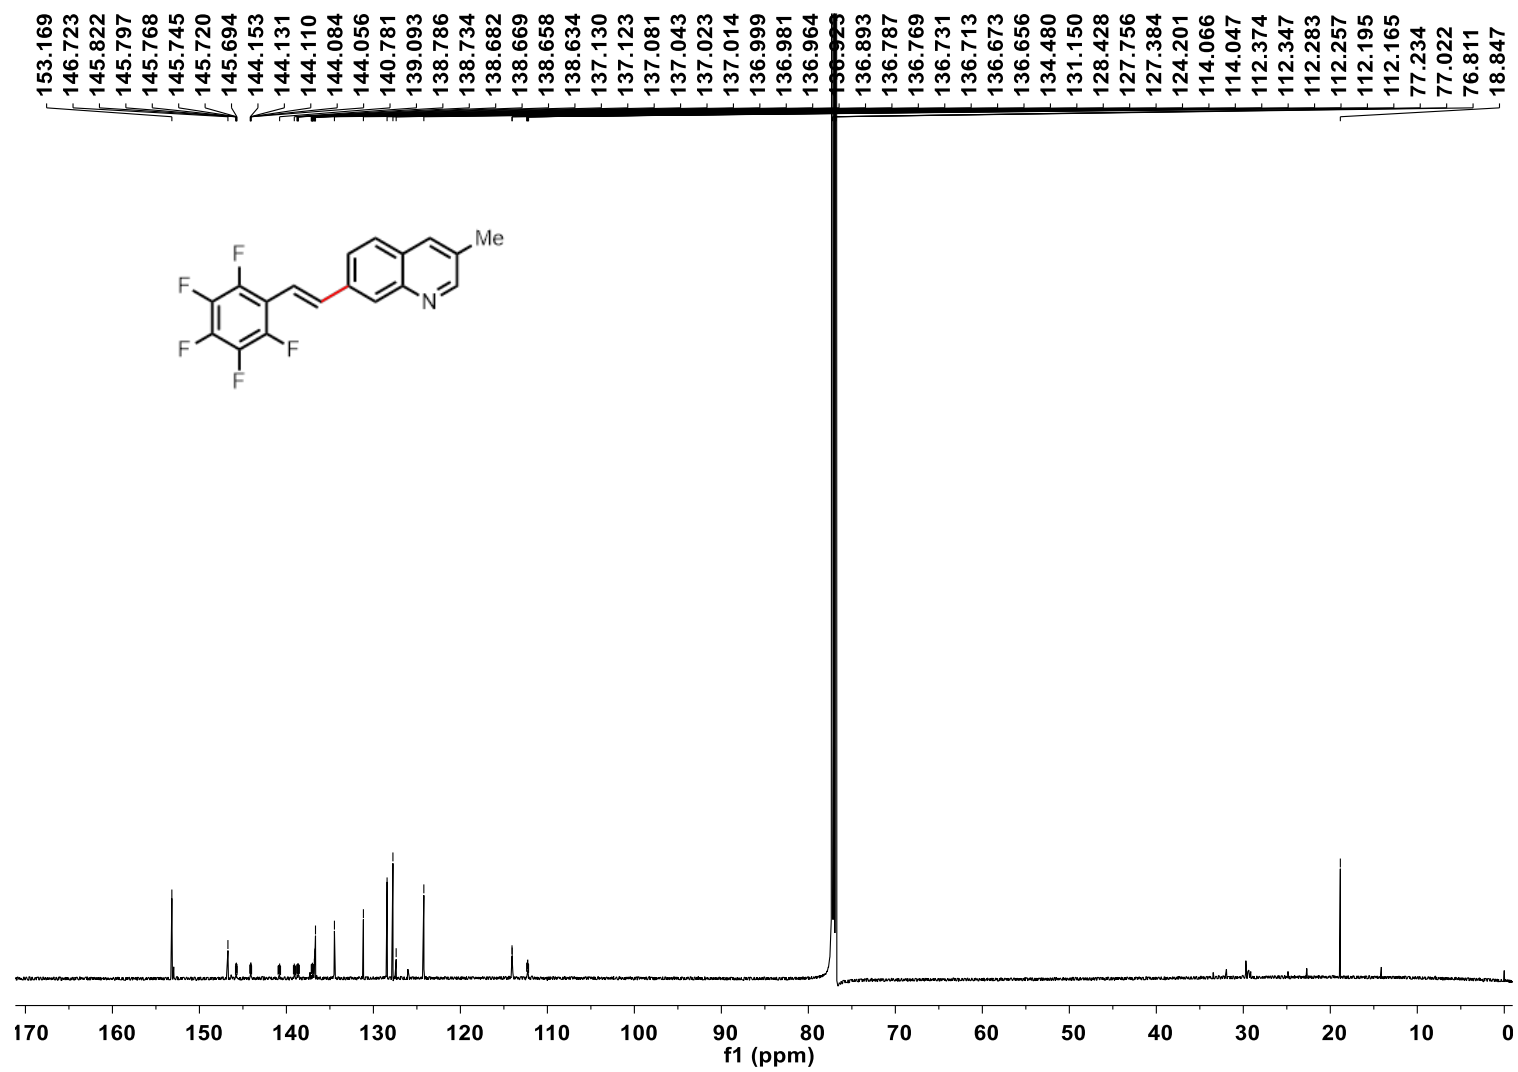

$^{19}\text{F}$  NMR (376 MHz,  $\text{CDCl}_3$ ) spectrum of **3w**

-144.979  
-145.001  
-145.038  
-145.060

-158.553  
-158.610  
-158.667

-165.331  
-165.352  
-165.389  
-165.410  
-165.447  
-165.468

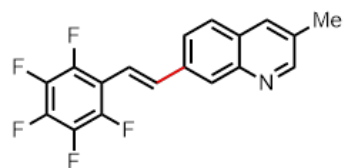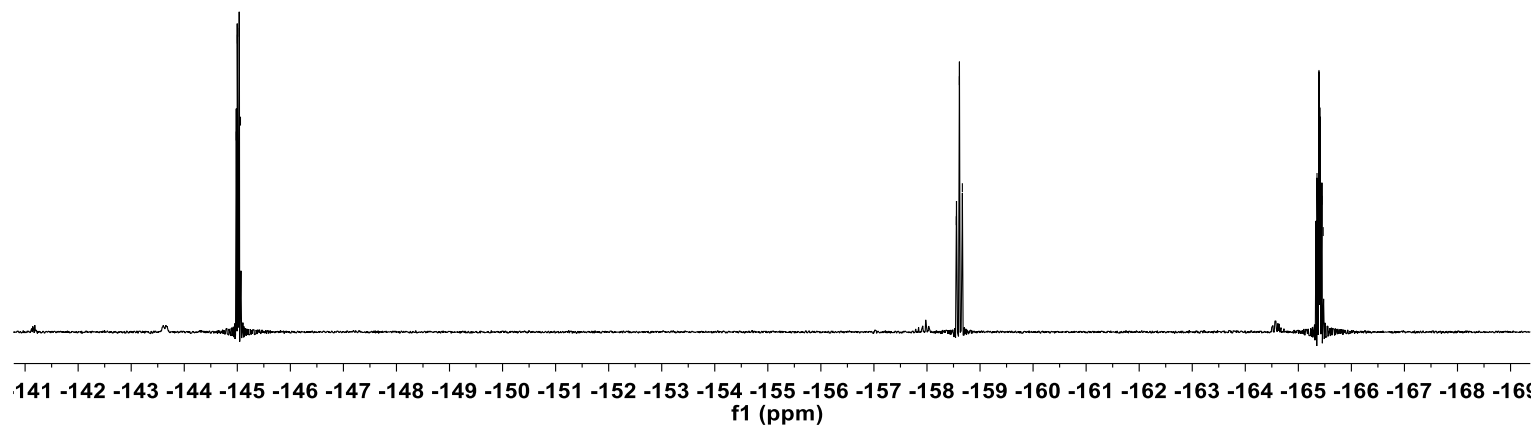



$^{13}\text{C}$  NMR (151 MHz,  $\text{CDCl}_3$ ) spectrum of **3x**

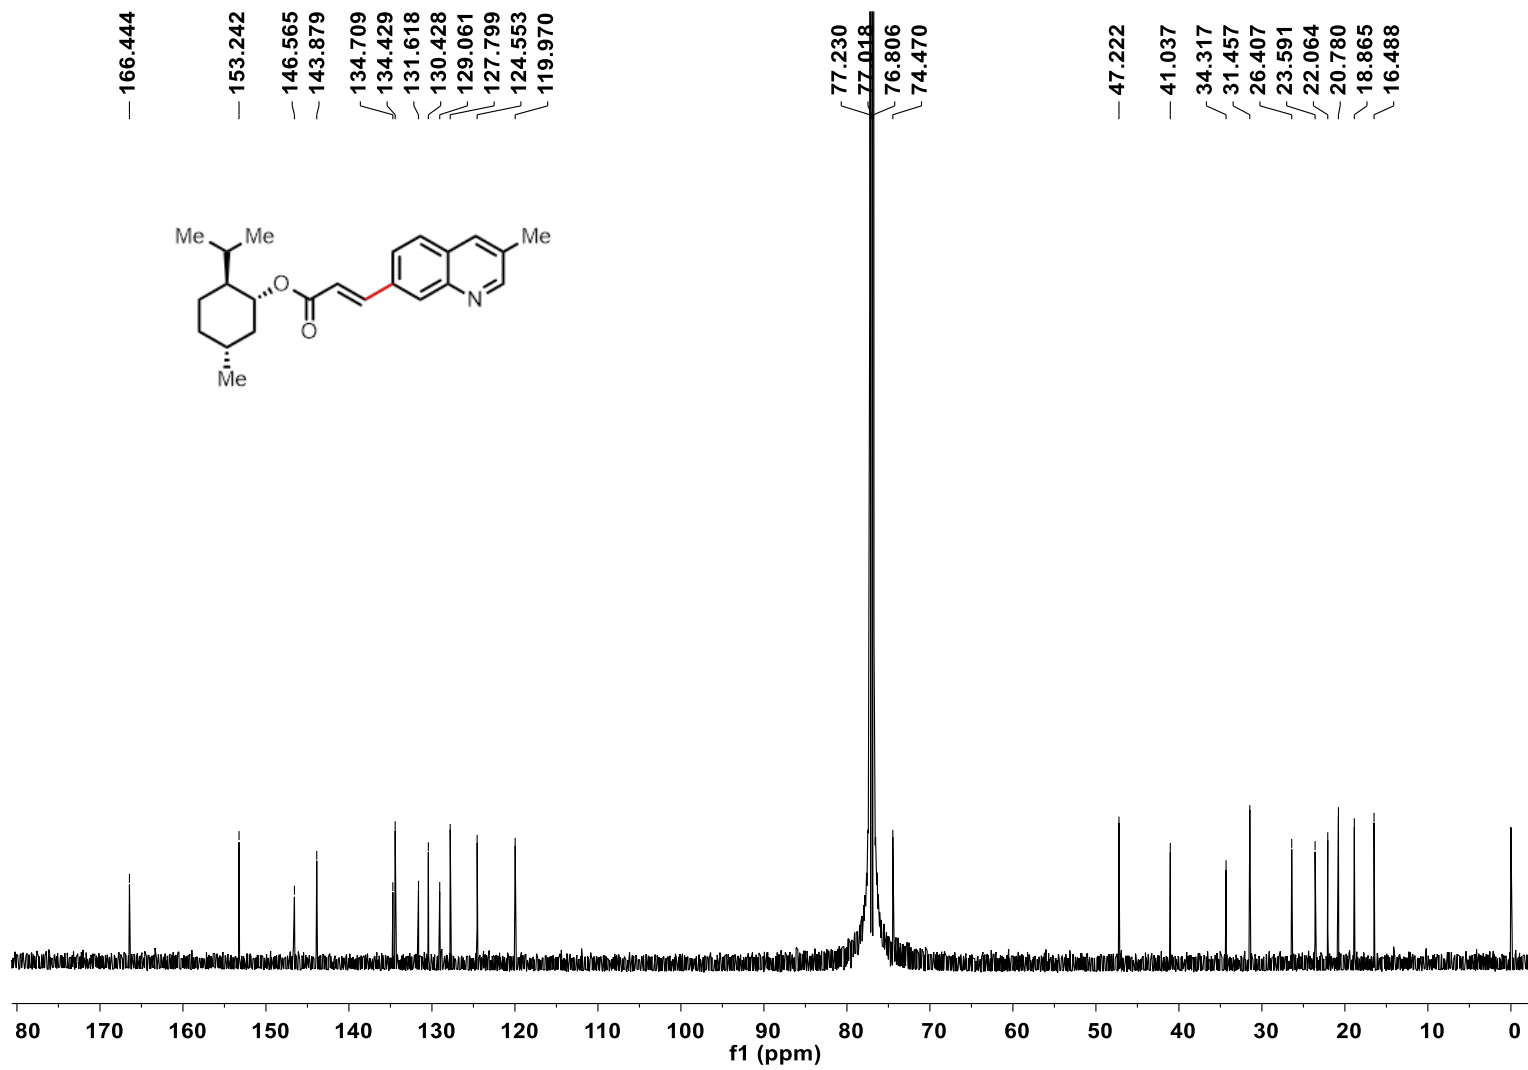



<sup>1</sup>H NMR (600 MHz, CDCl<sub>3</sub>) spectrum of 3y

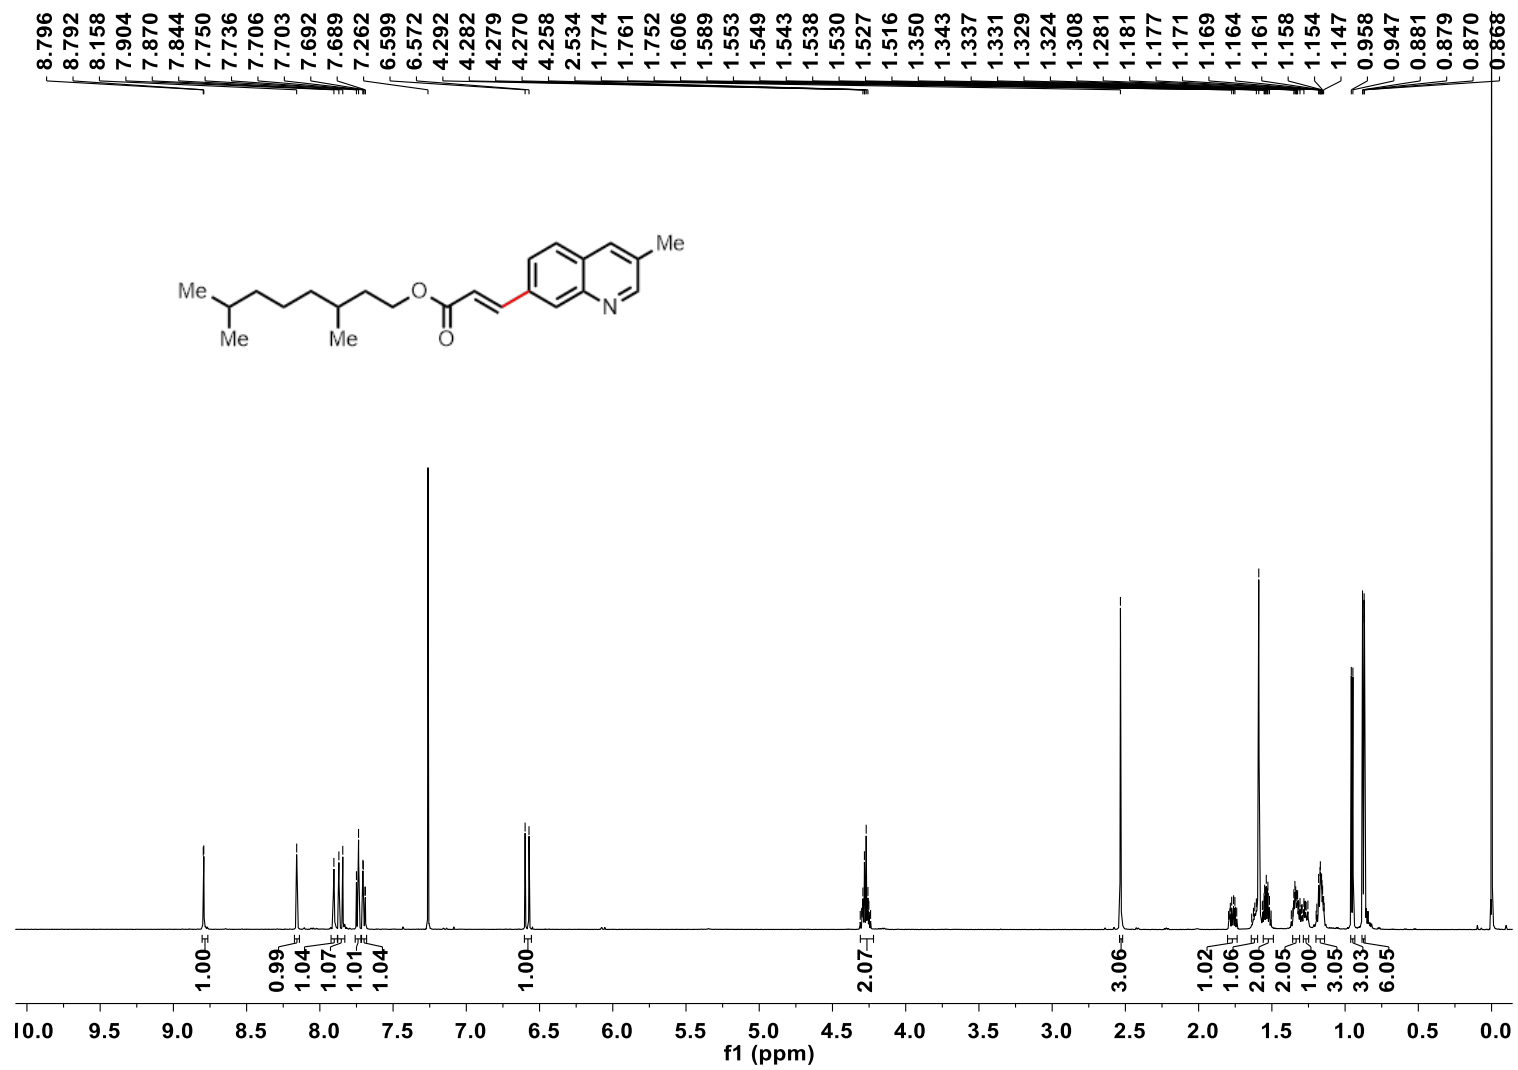

$^{13}\text{C}$  NMR (151 MHz,  $\text{CDCl}_3$ ) spectrum of **3y**

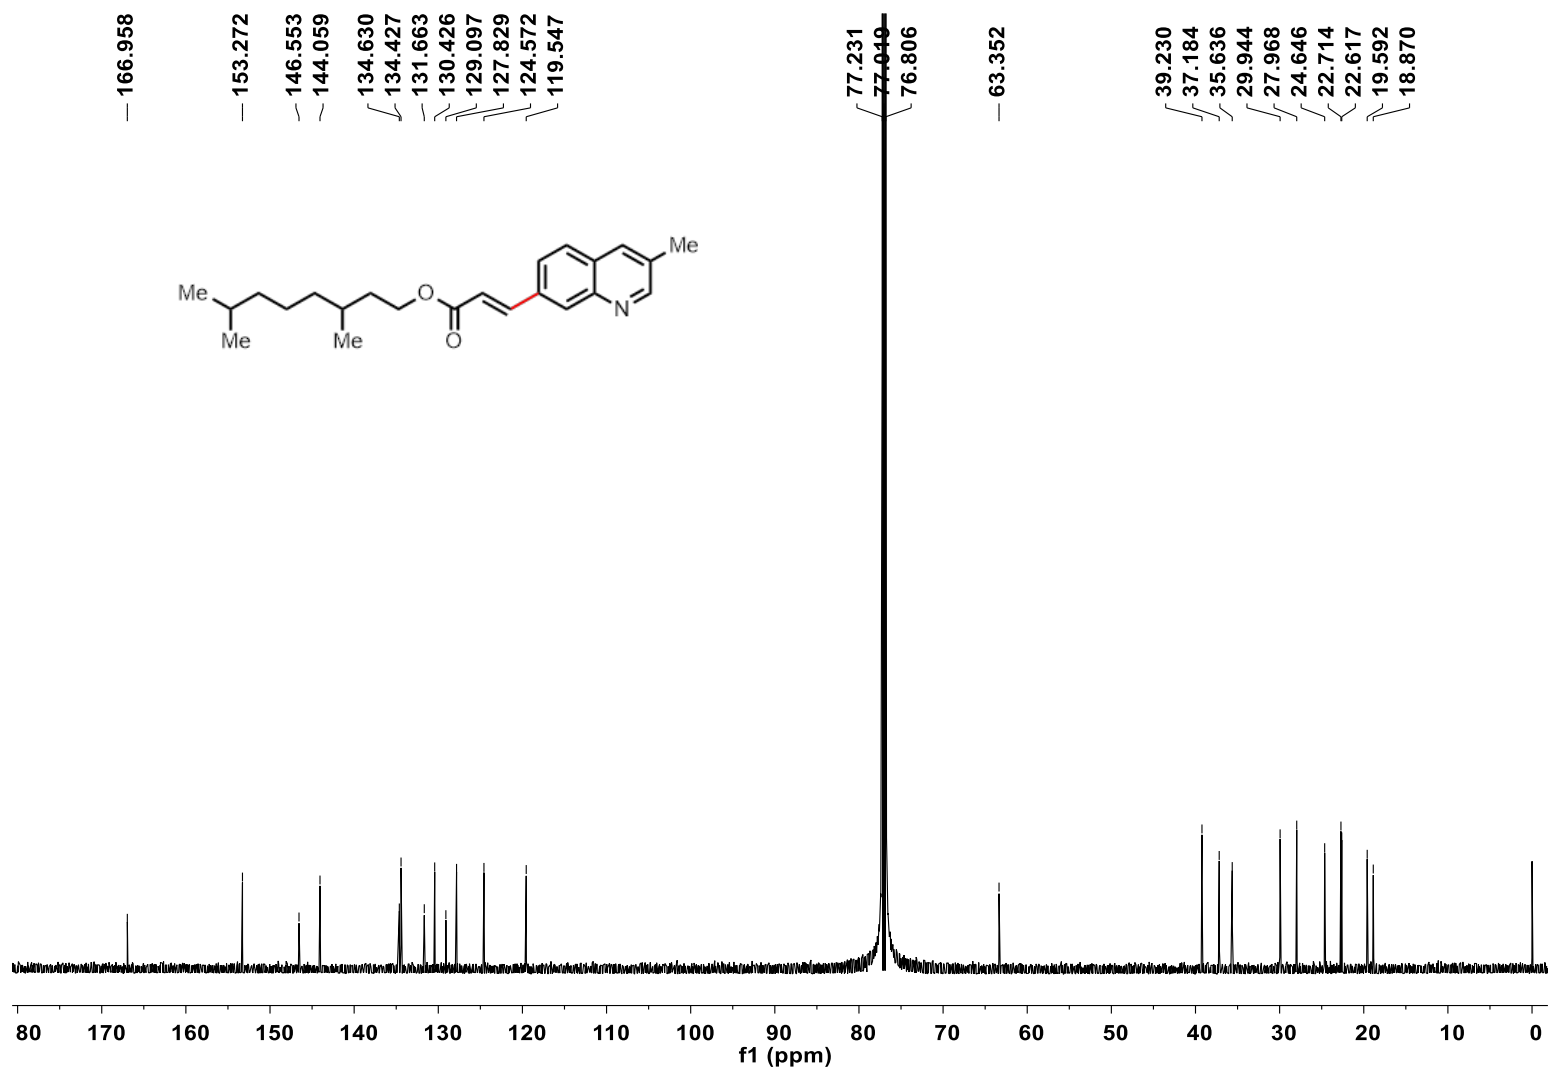

<sup>1</sup>H NMR (600 MHz, CDCl<sub>3</sub>) spectrum of **3z**

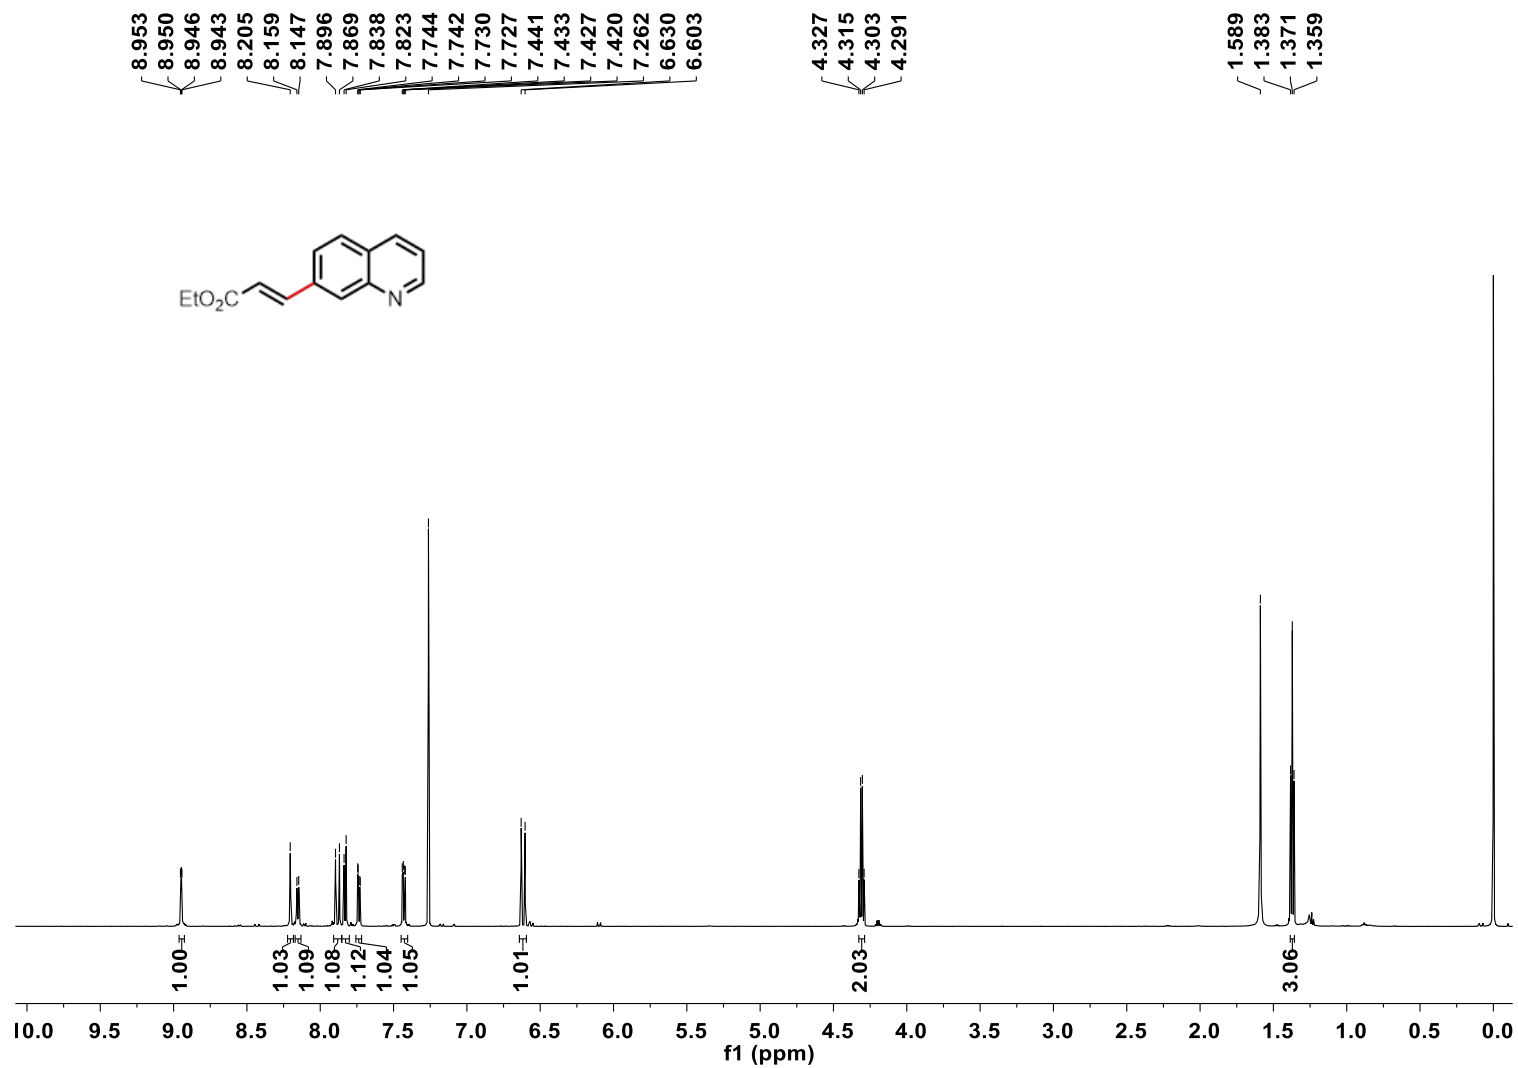

<sup>13</sup>C NMR (151 MHz, CDCl<sub>3</sub>) spectrum of **3z**

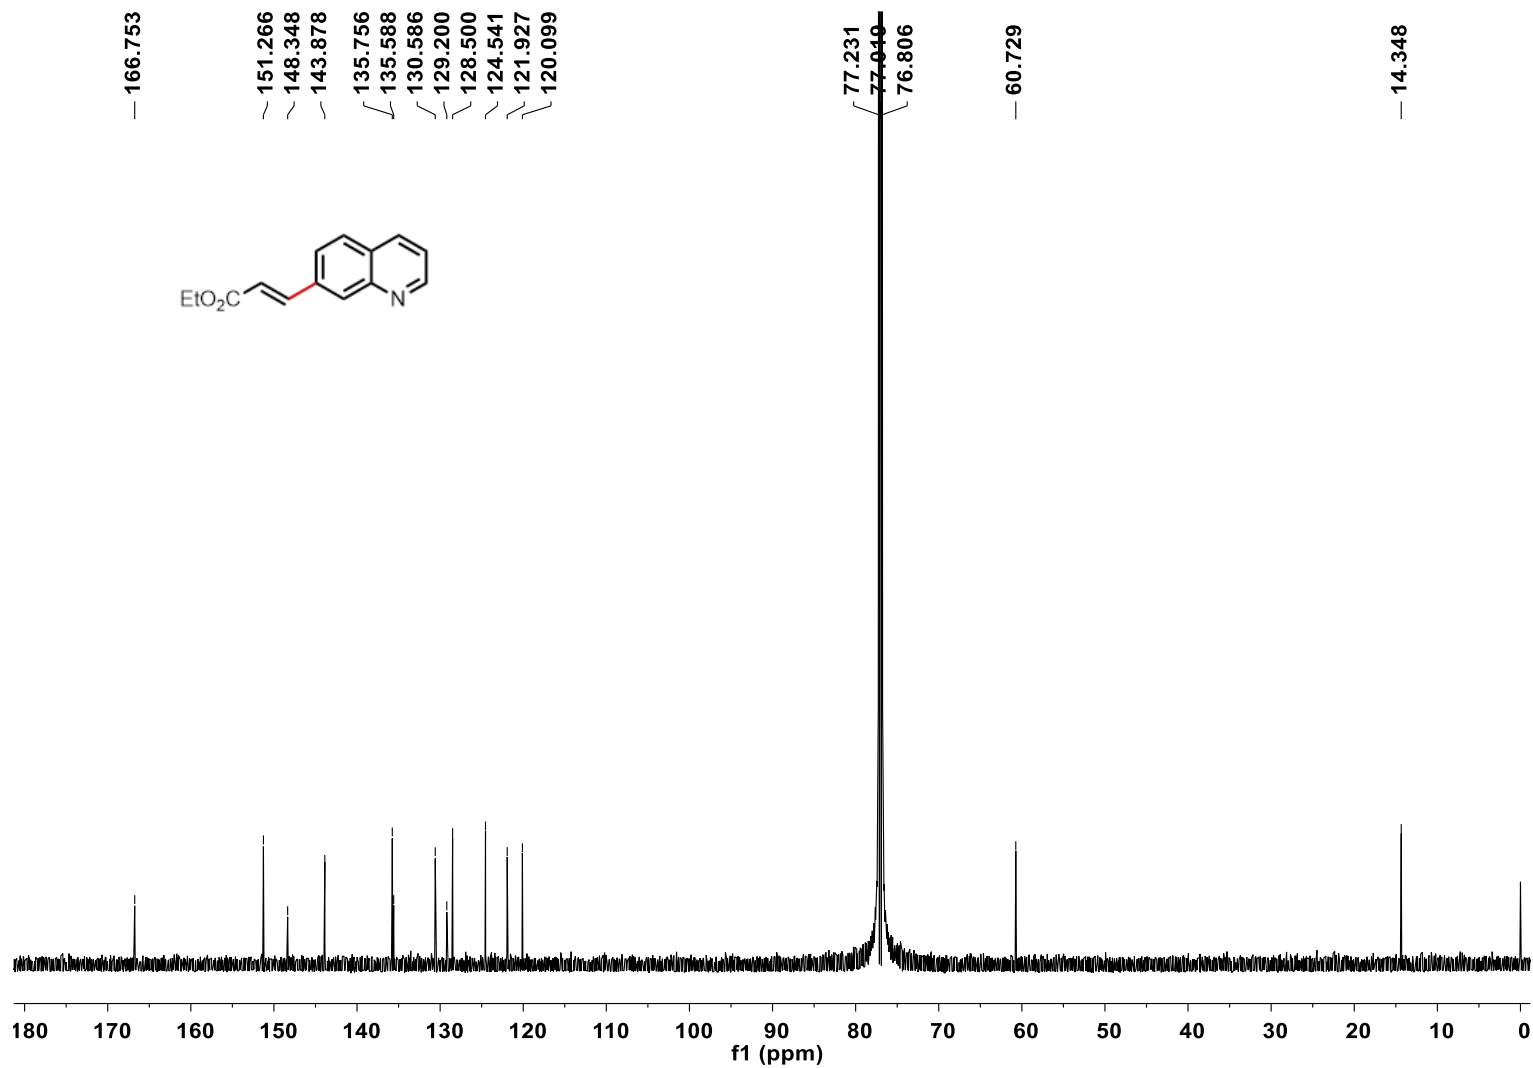

<sup>1</sup>H NMR (600 MHz, CDCl<sub>3</sub>) spectrum of **3aa**

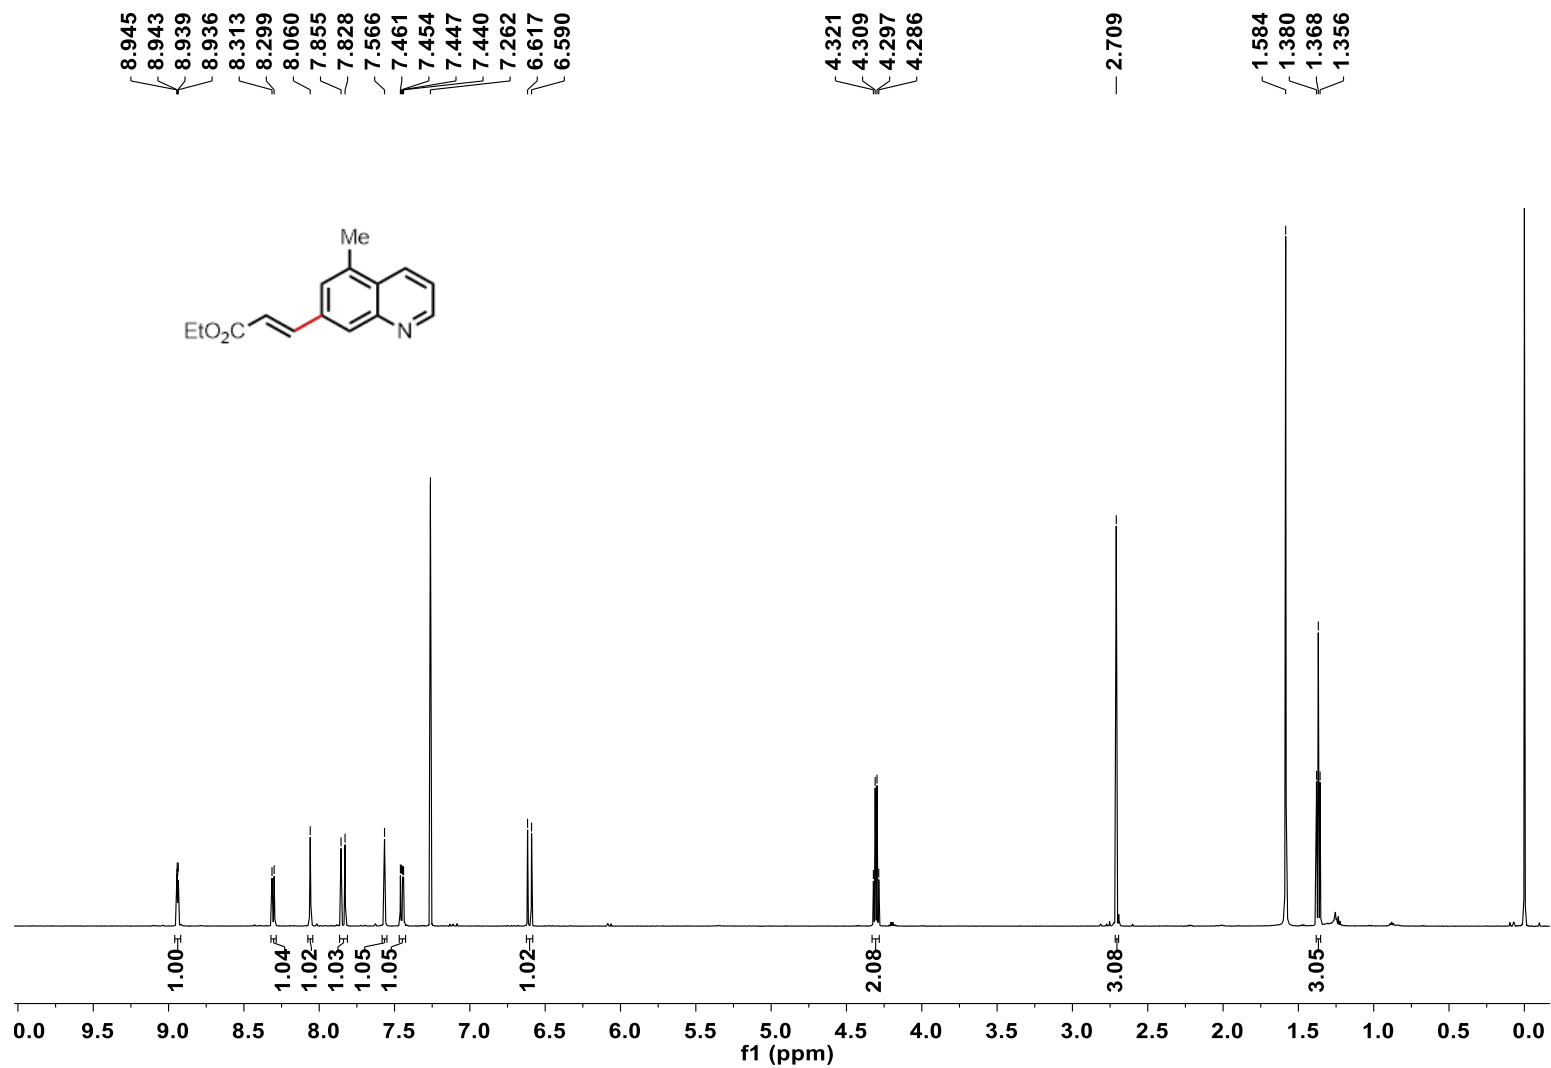

<sup>13</sup>C NMR (151 MHz, CDCl<sub>3</sub>) spectrum of **3aa**

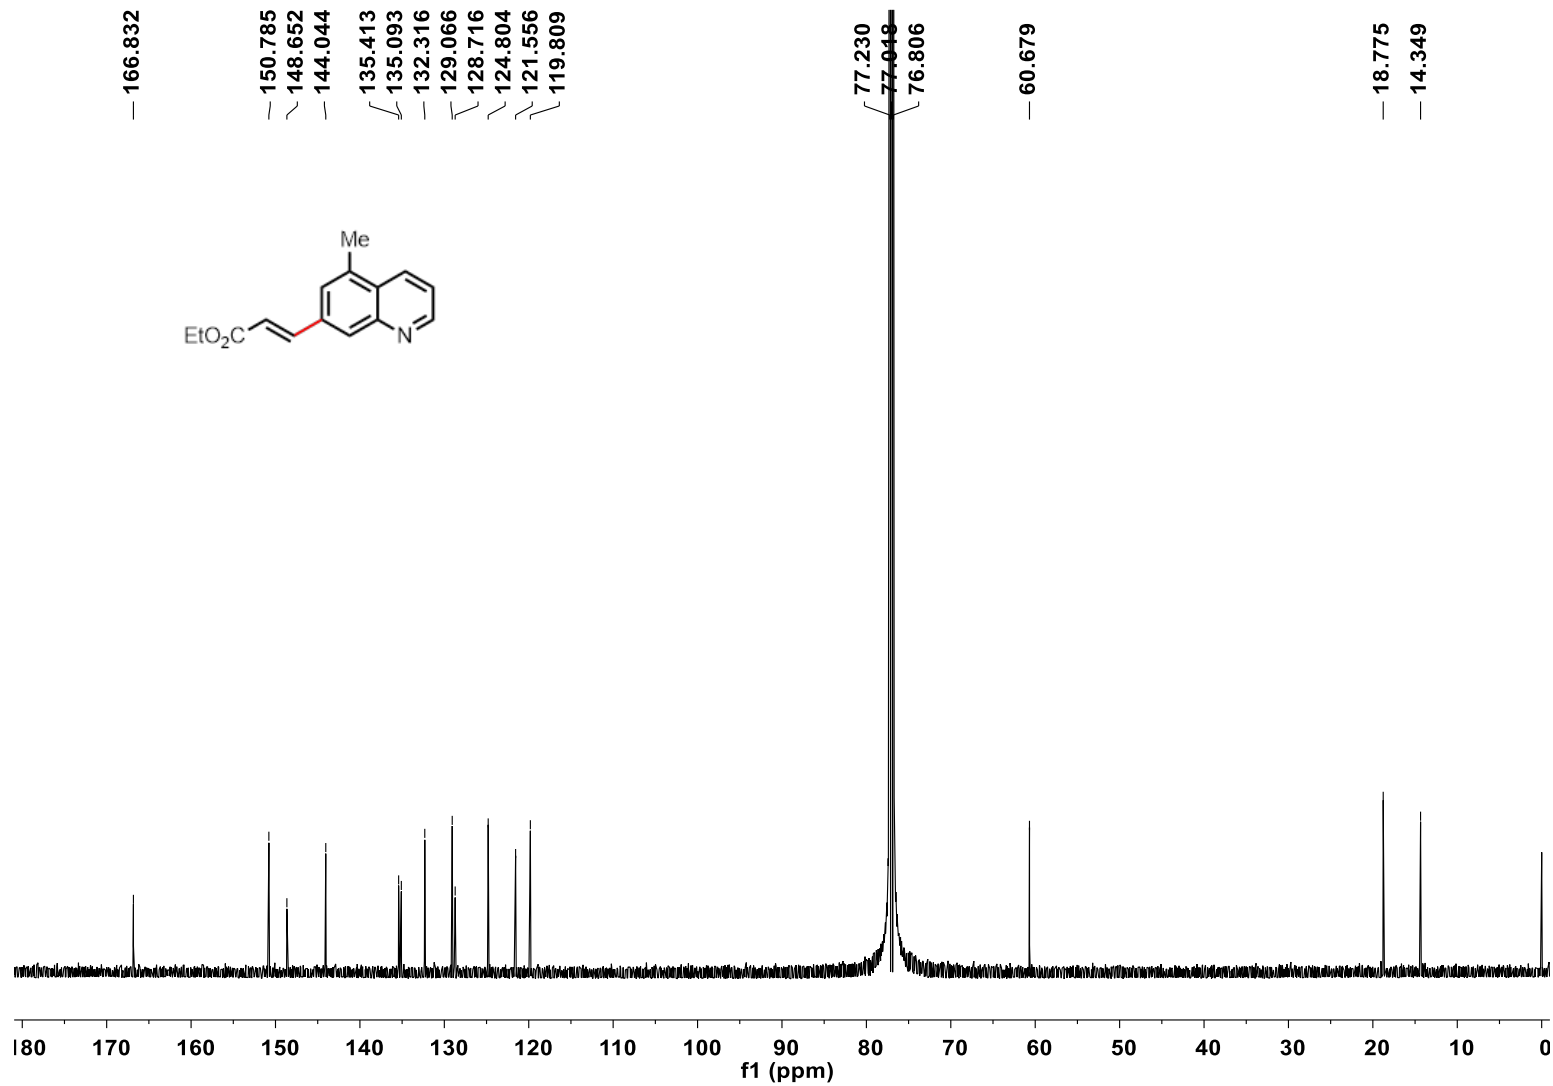

<sup>1</sup>H NMR (600 MHz, CDCl<sub>3</sub>) spectrum of **3ab**

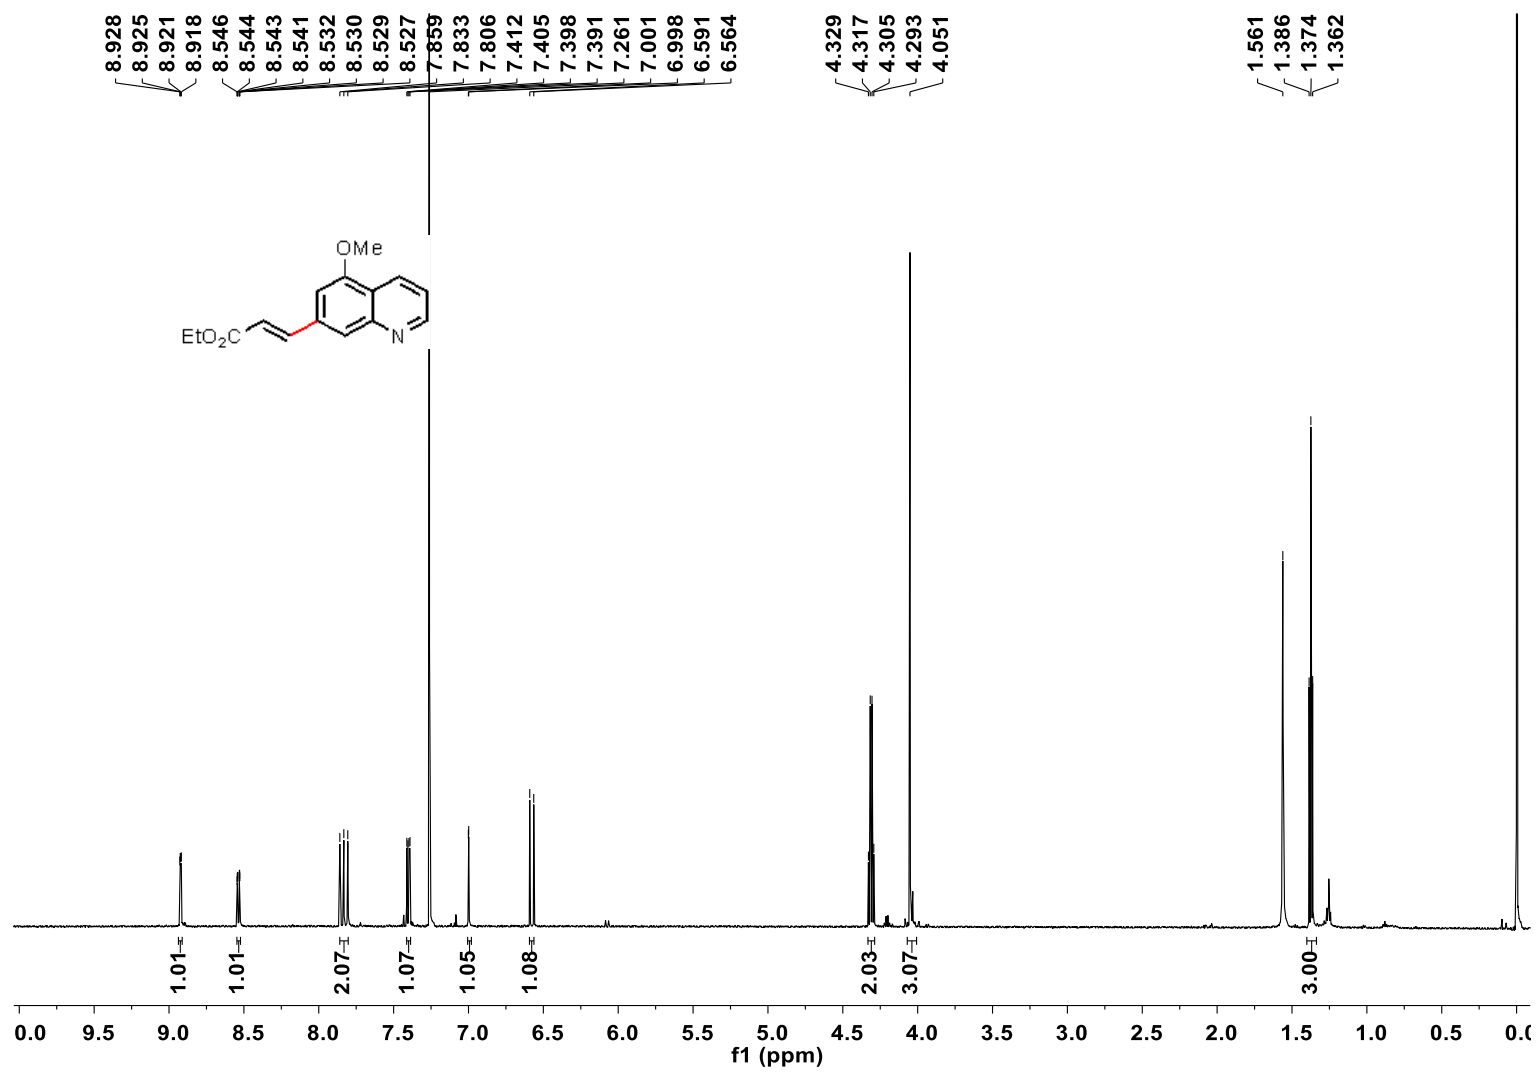

<sup>13</sup>C NMR (151 MHz, CDCl<sub>3</sub>) spectrum of **3ab**

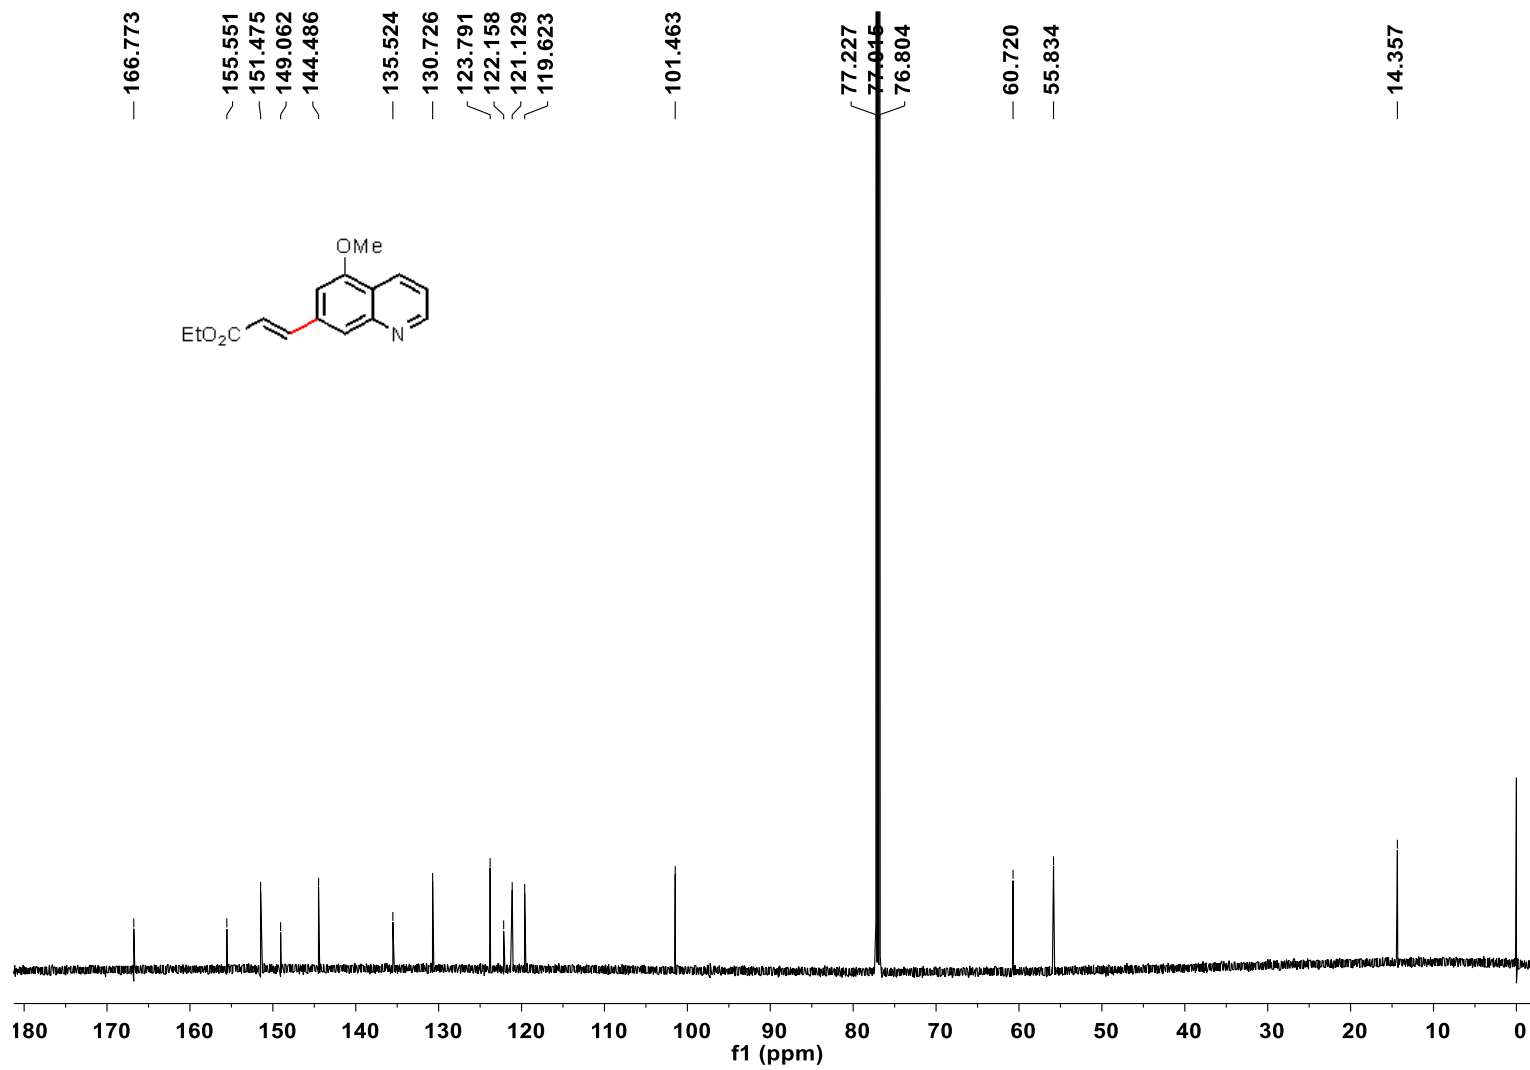



<sup>1</sup>H NMR (600 MHz, CDCl<sub>3</sub>) spectrum of **3ac**

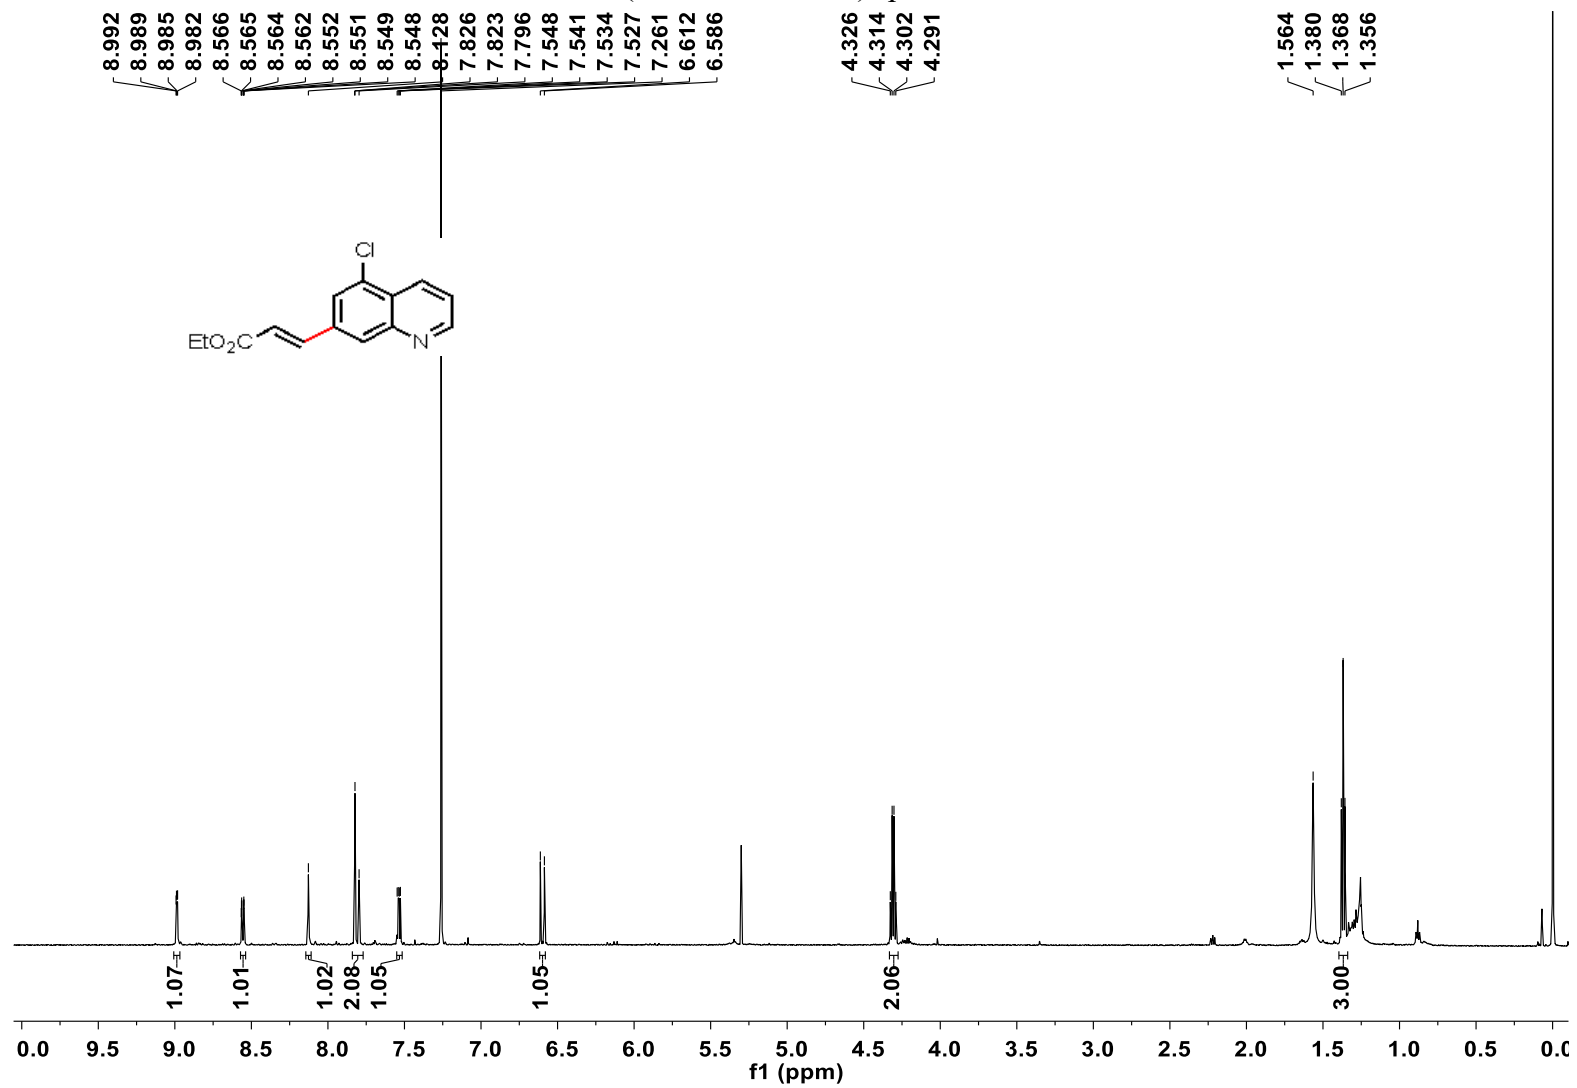

$^{13}\text{C}$  NMR (151 MHz,  $\text{CDCl}_3$ ) spectrum of **3ac**

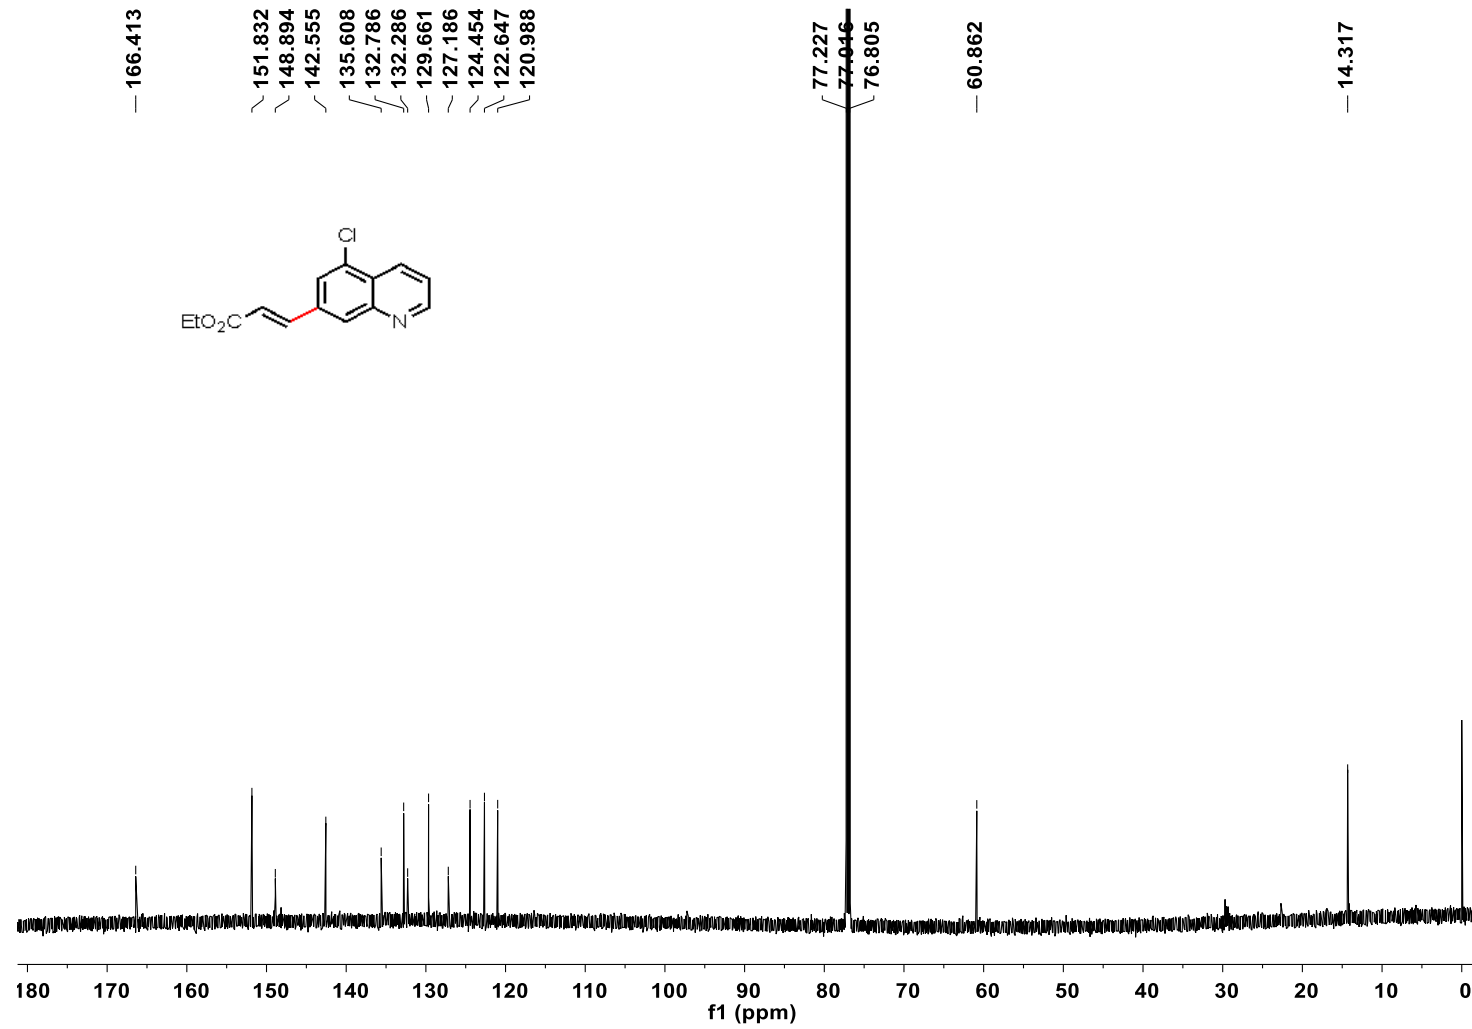

<sup>1</sup>H NMR (600 MHz, CDCl<sub>3</sub>) spectrum of **3ad**

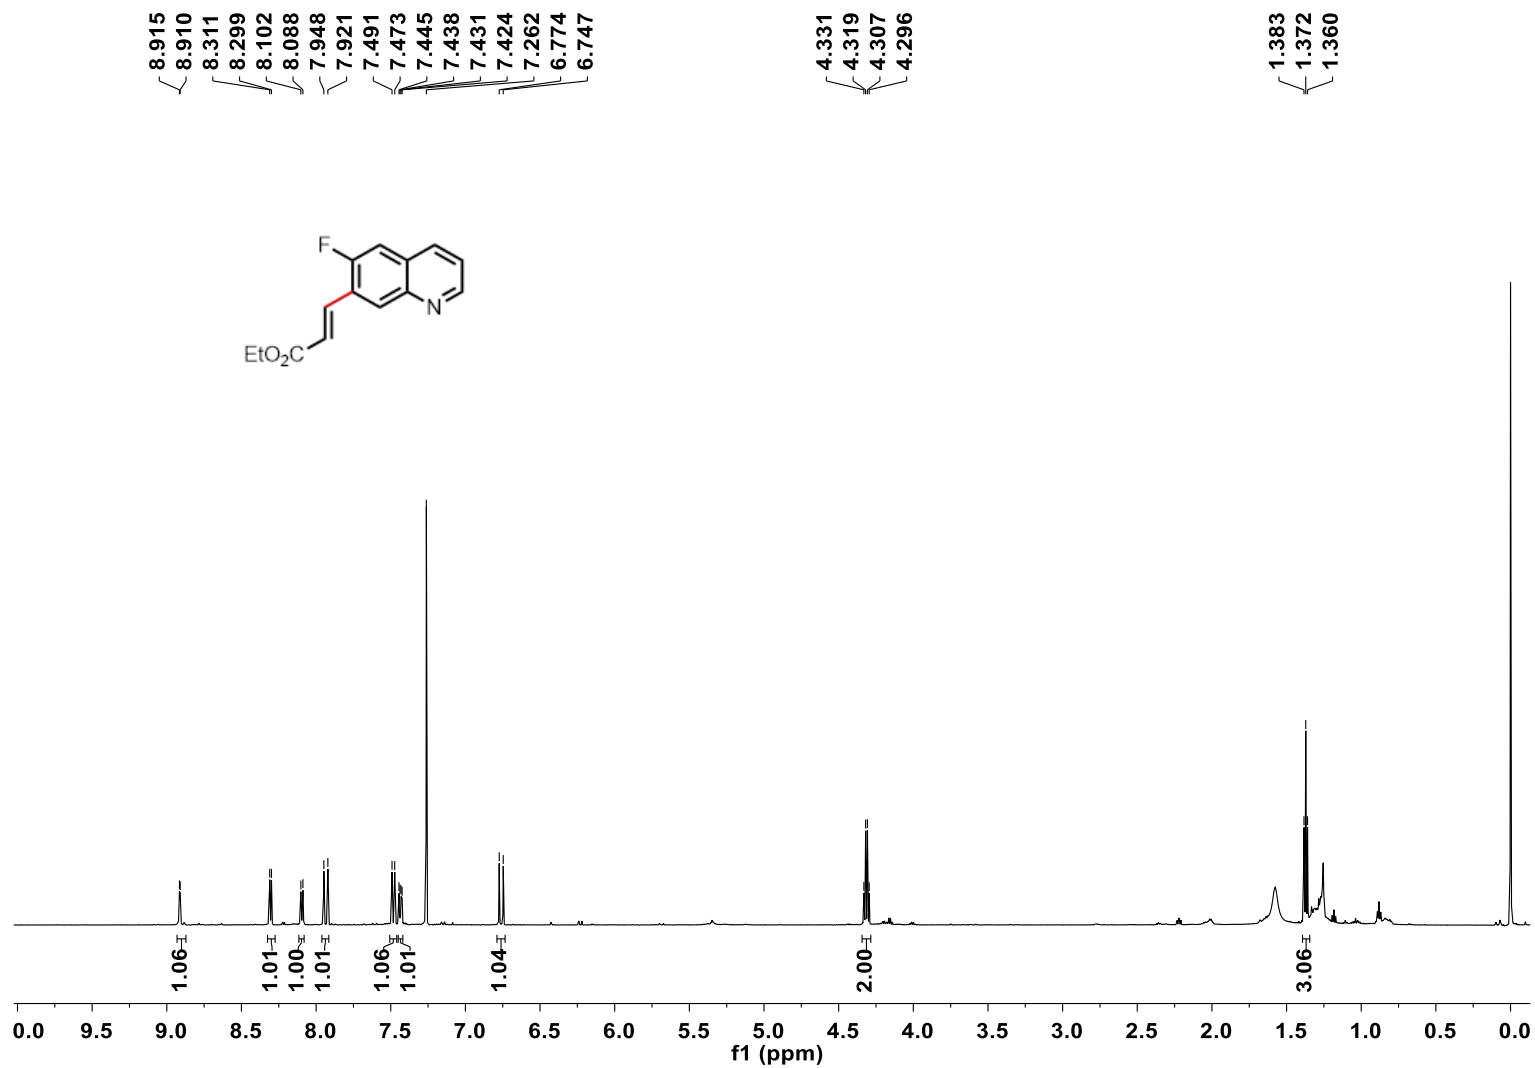

$^{13}\text{C}$  NMR (151 MHz,  $\text{CDCl}_3$ ) spectrum of **3ad**

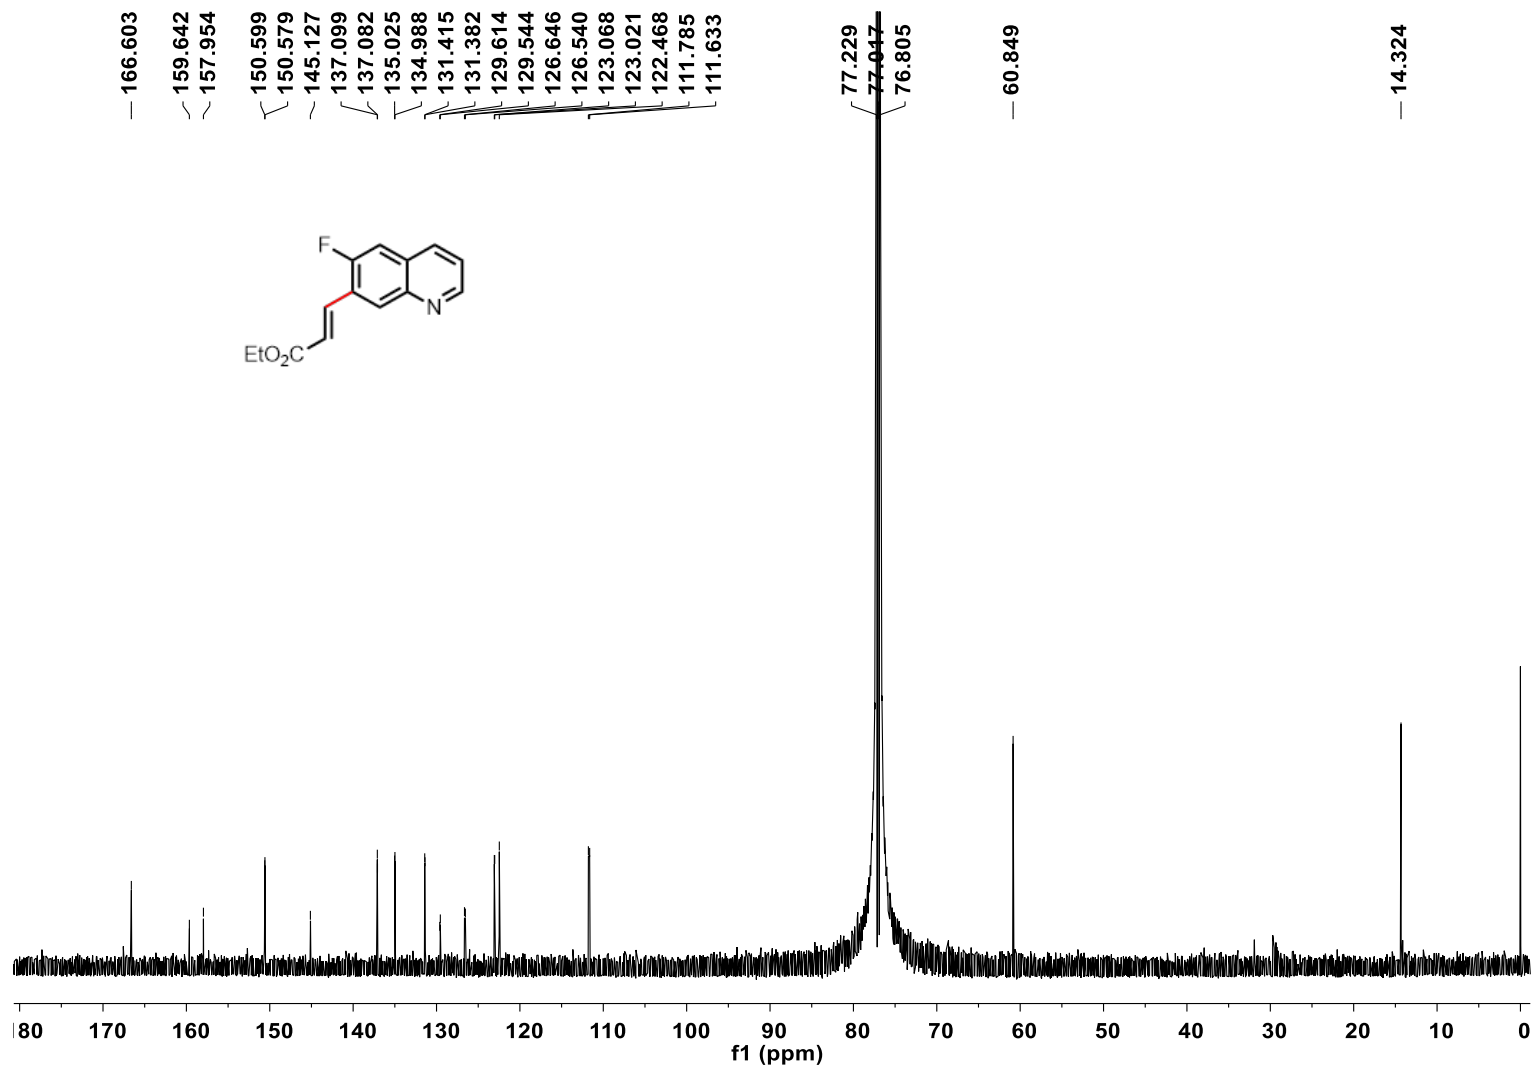

$^{19}\text{F}$  NMR (376 MHz,  $\text{CDCl}_3$ ) spectrum of **3ad**

-119.175

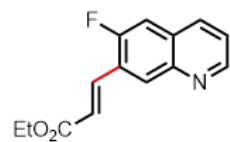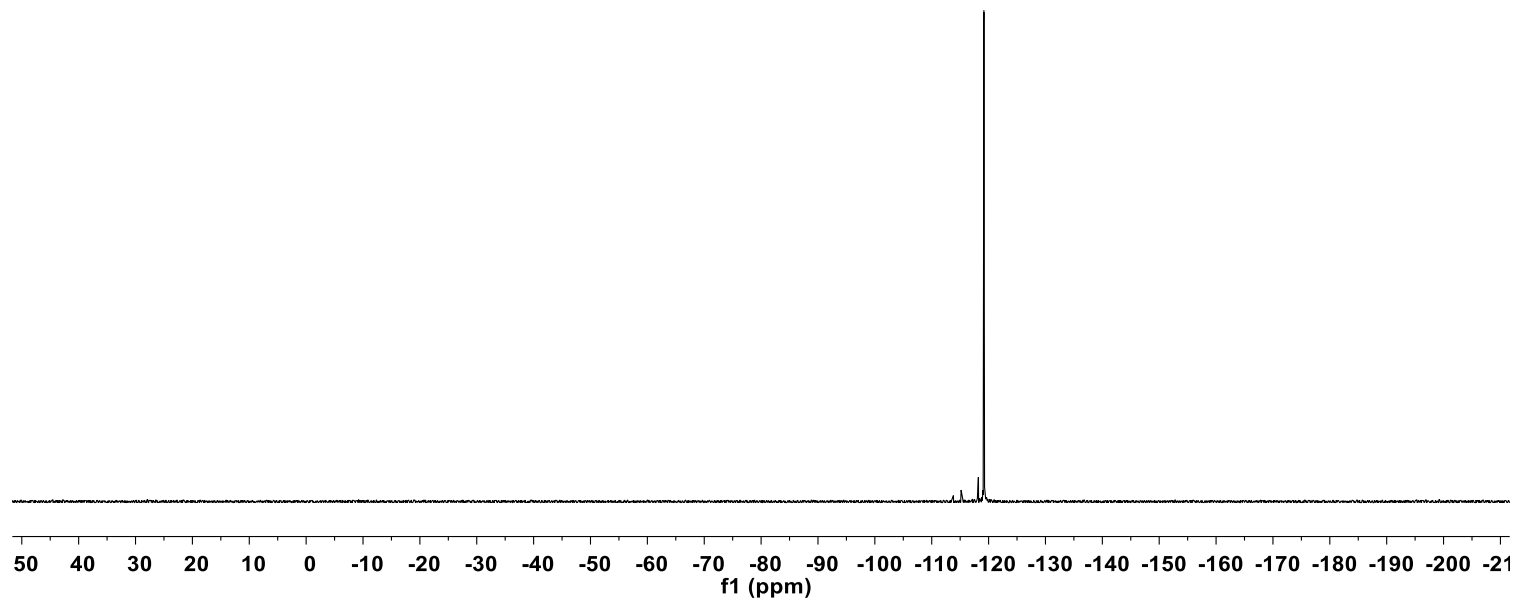

$^1\text{H}$  NMR (600 MHz,  $\text{CDCl}_3$ ) spectrum of **4a**

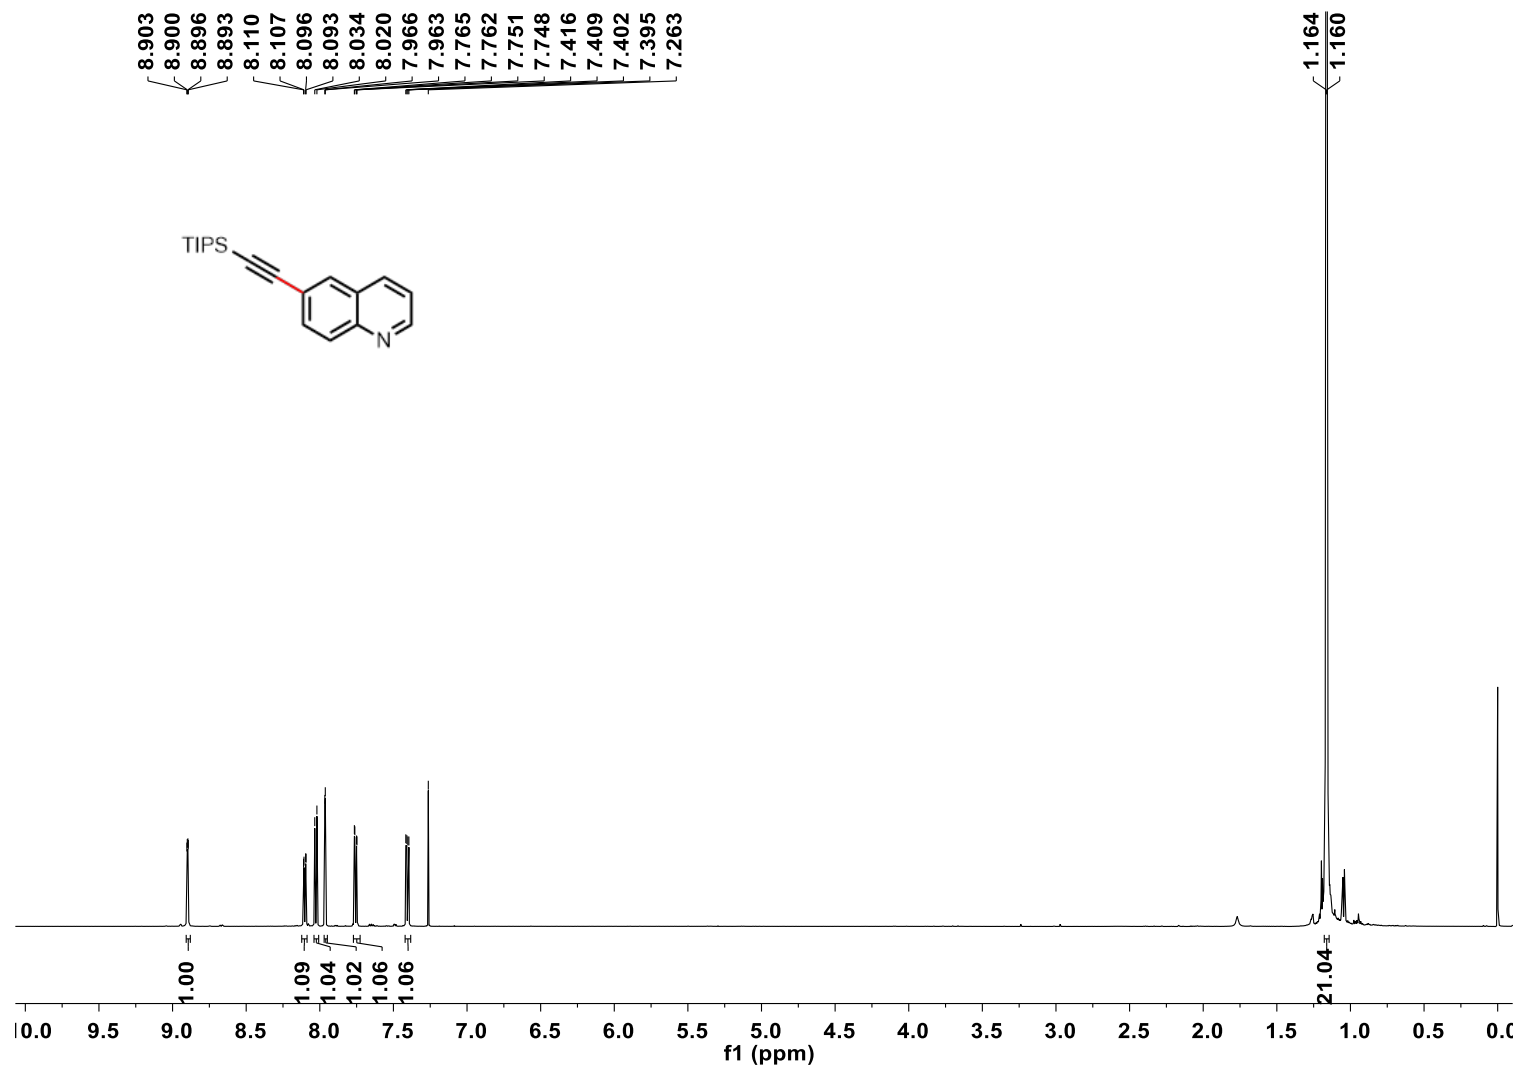

<sup>13</sup>C NMR (151 MHz, CDCl<sub>3</sub>) spectrum of **4a**

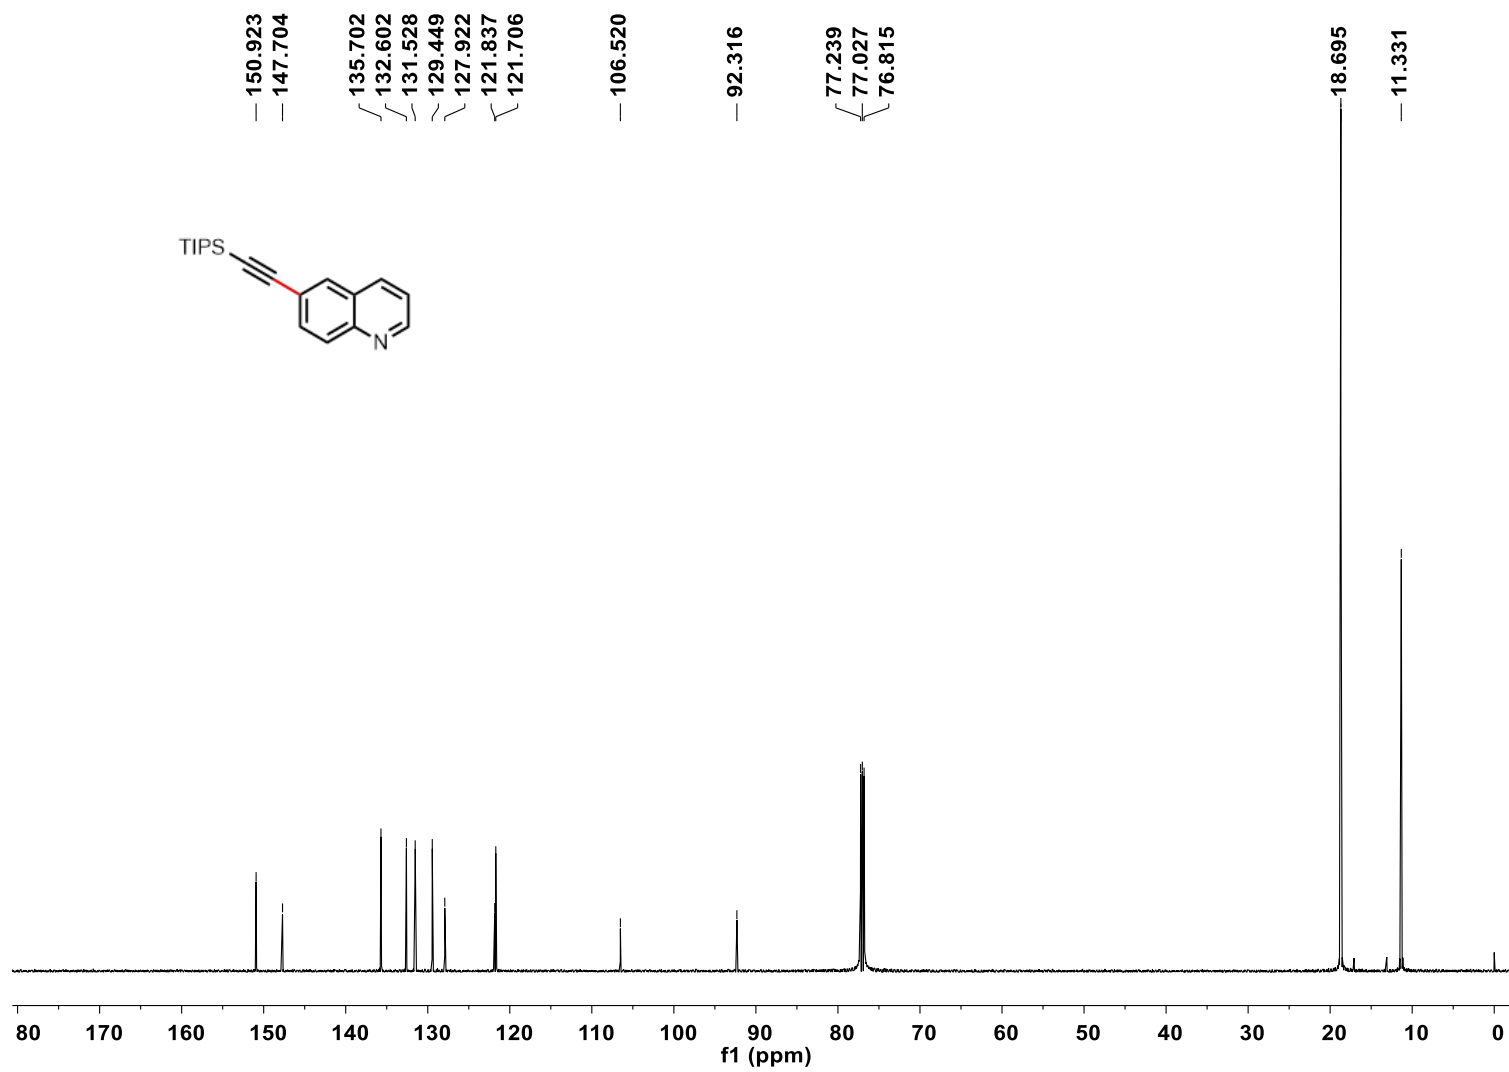





<sup>13</sup>C NMR (151 MHz, CDCl<sub>3</sub>) spectrum of **4b**

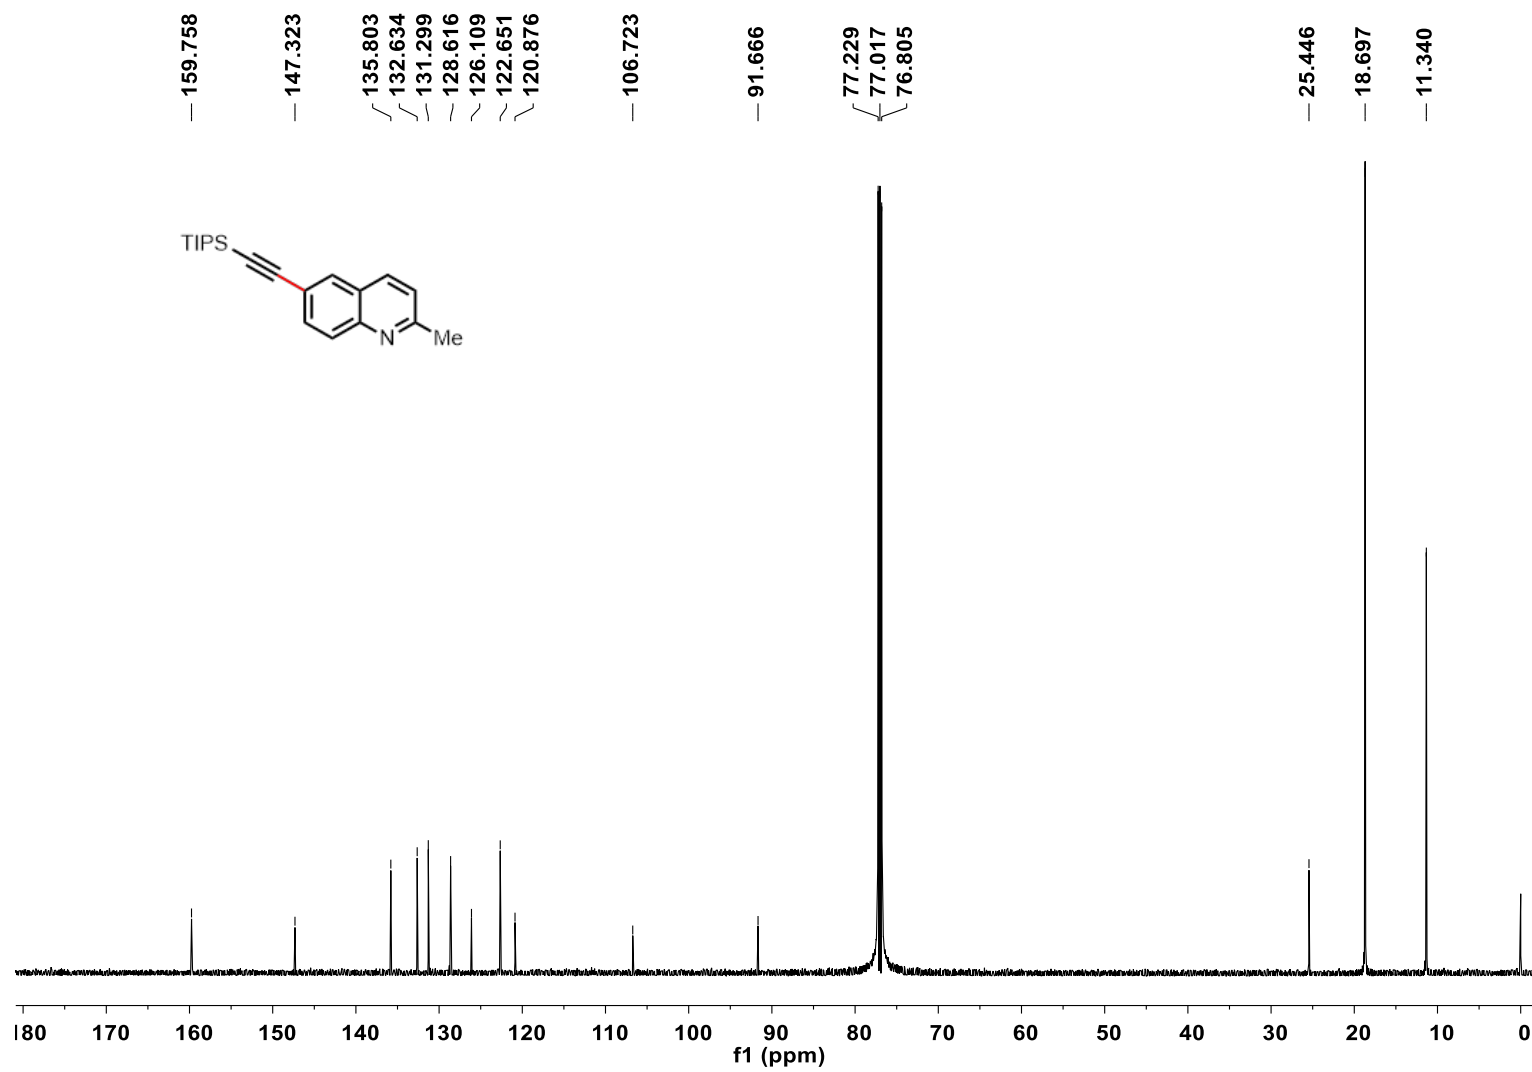



$^{13}\text{C}$  NMR (151 MHz,  $\text{CDCl}_3$ ) spectrum of **4c**

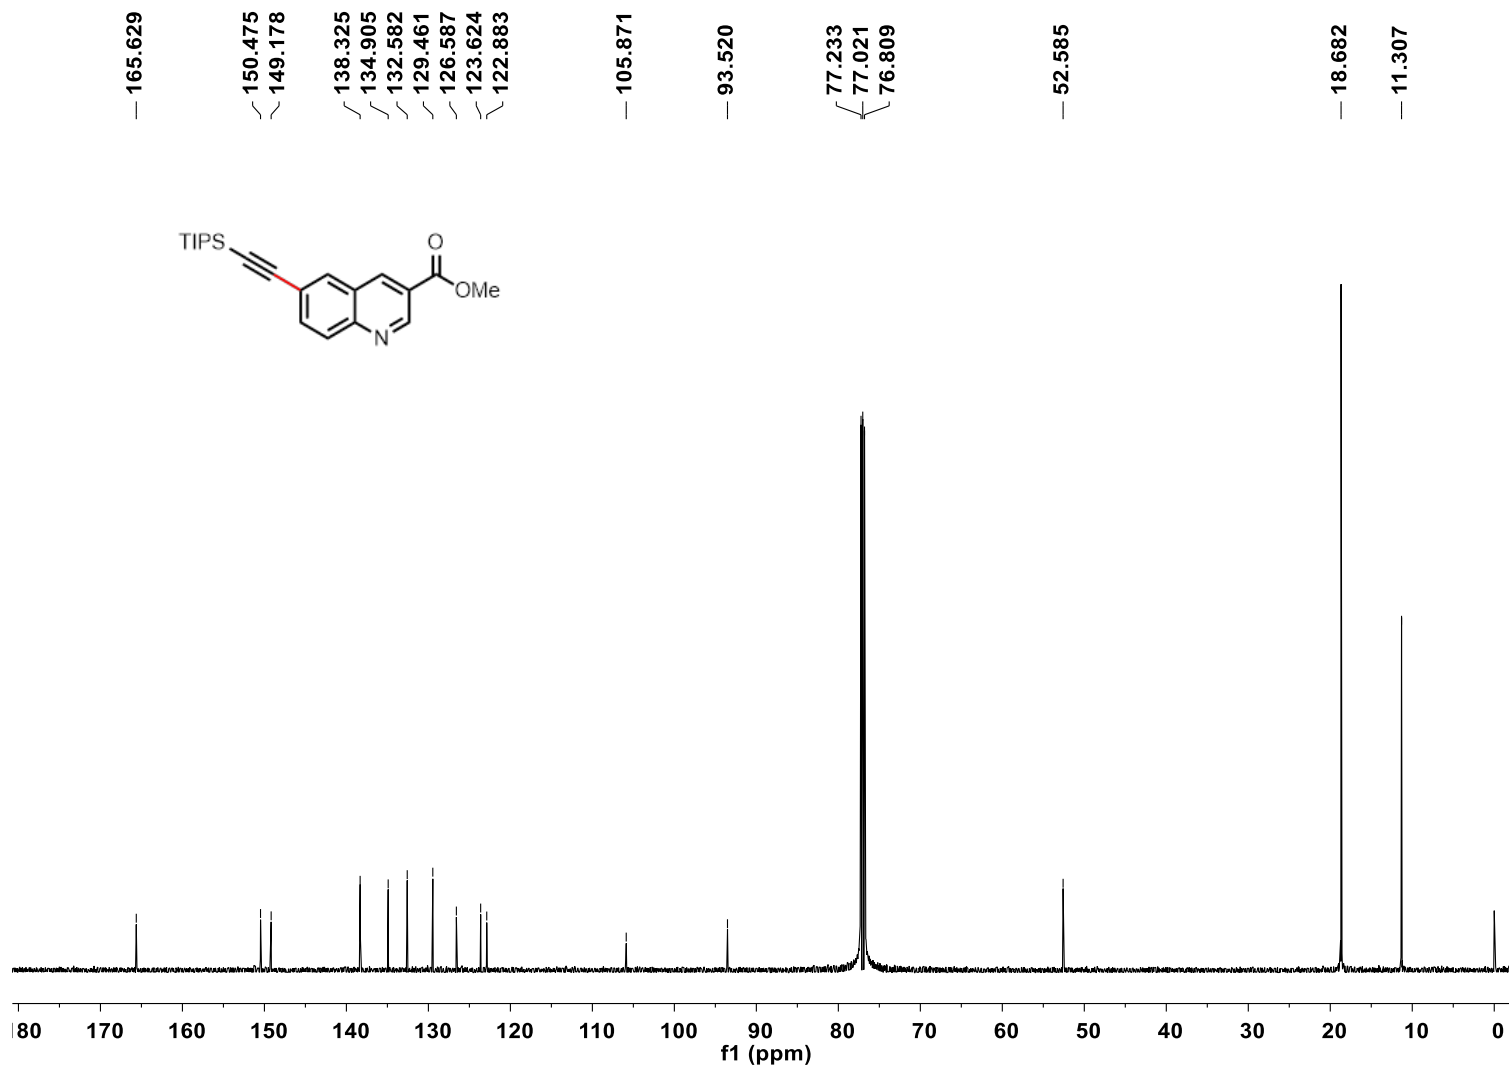

<sup>1</sup>H NMR (600 MHz, CDCl<sub>3</sub>) spectrum of **4d**

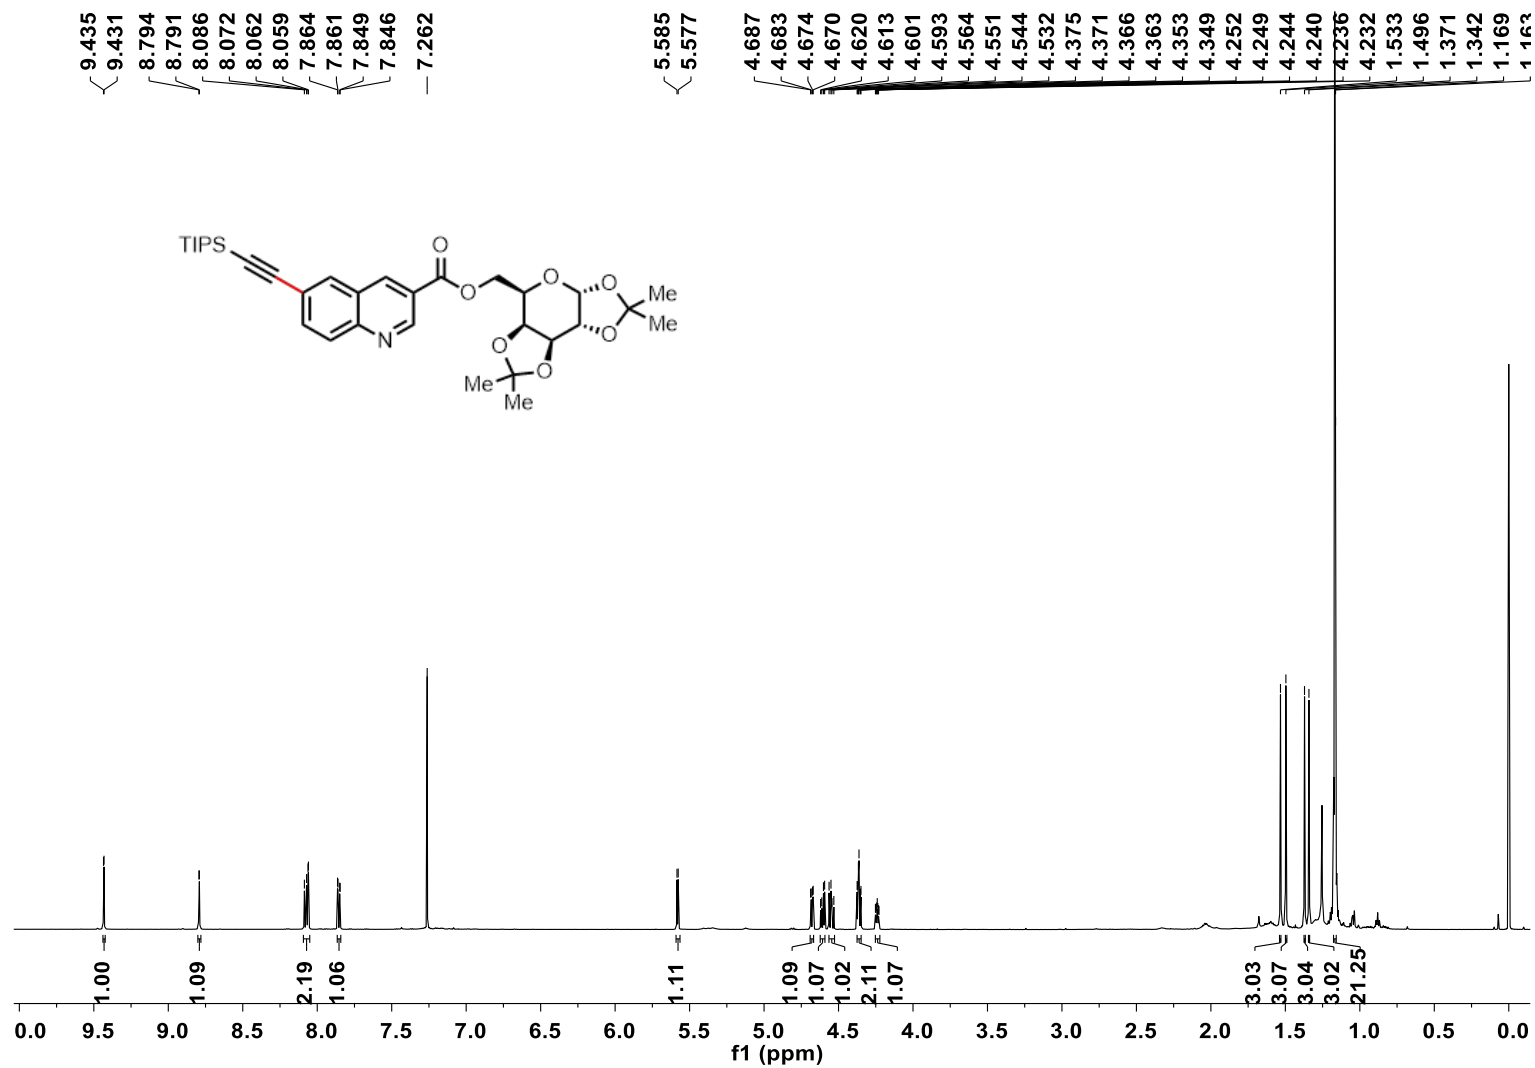



<sup>1</sup>H NMR (600 MHz, CDCl<sub>3</sub>) spectrum of 4e

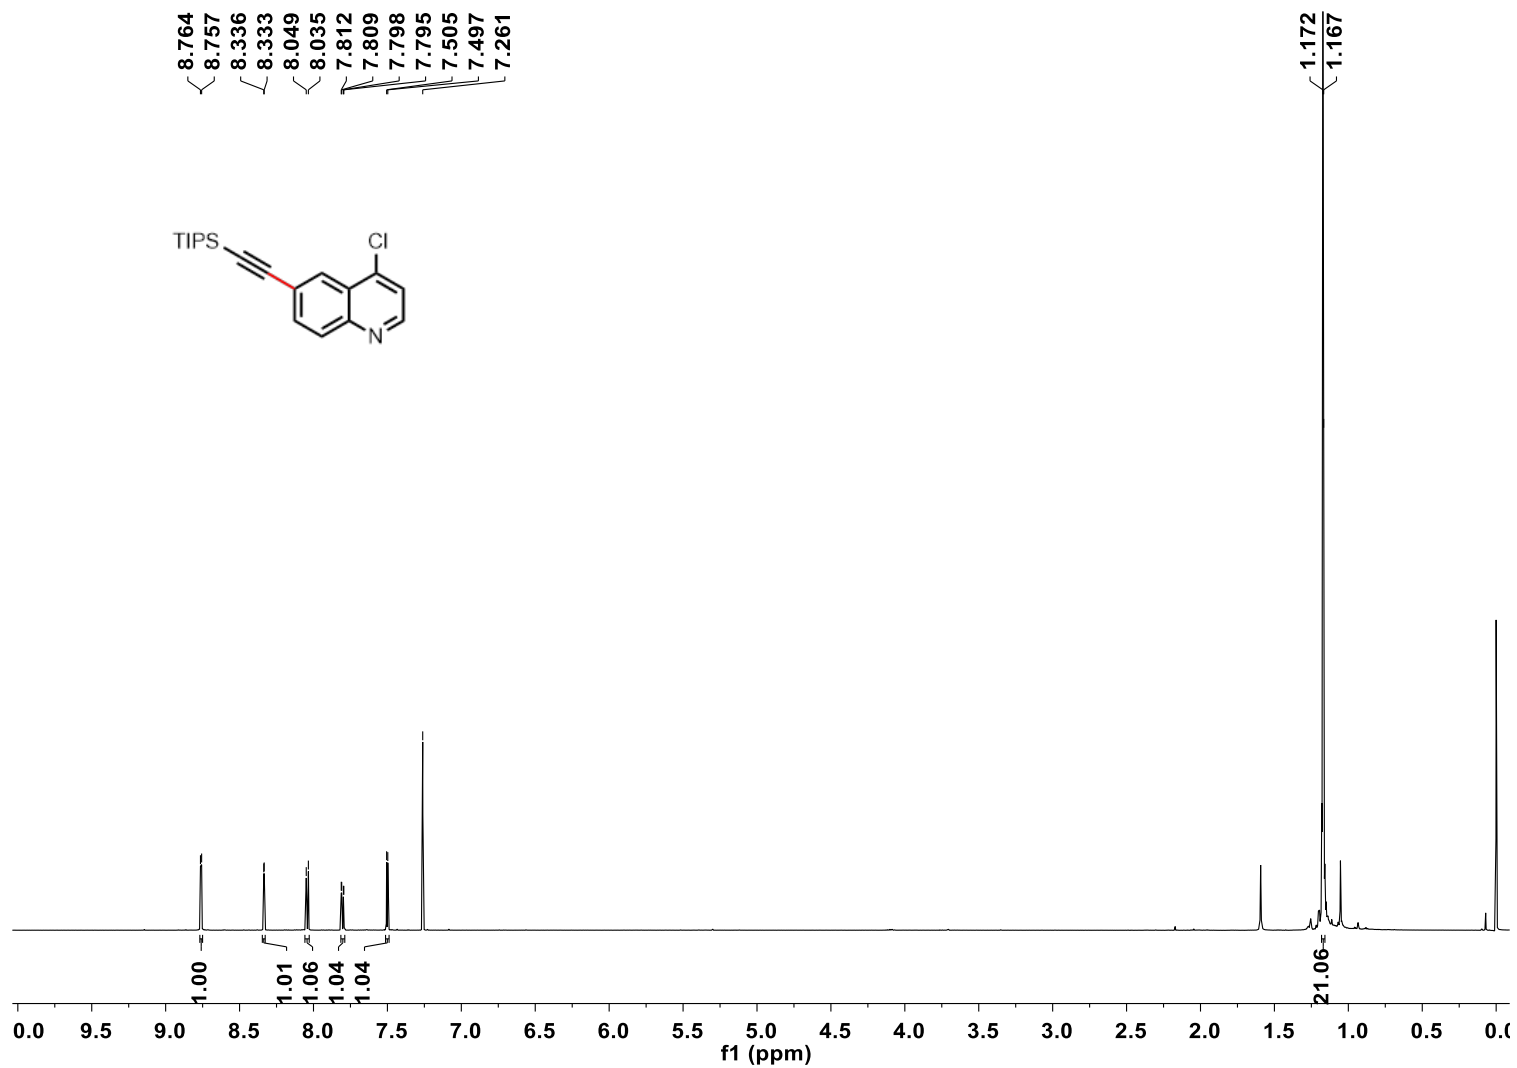

$^{13}\text{C}$  NMR (151 MHz,  $\text{CDCl}_3$ ) spectrum of **4e**

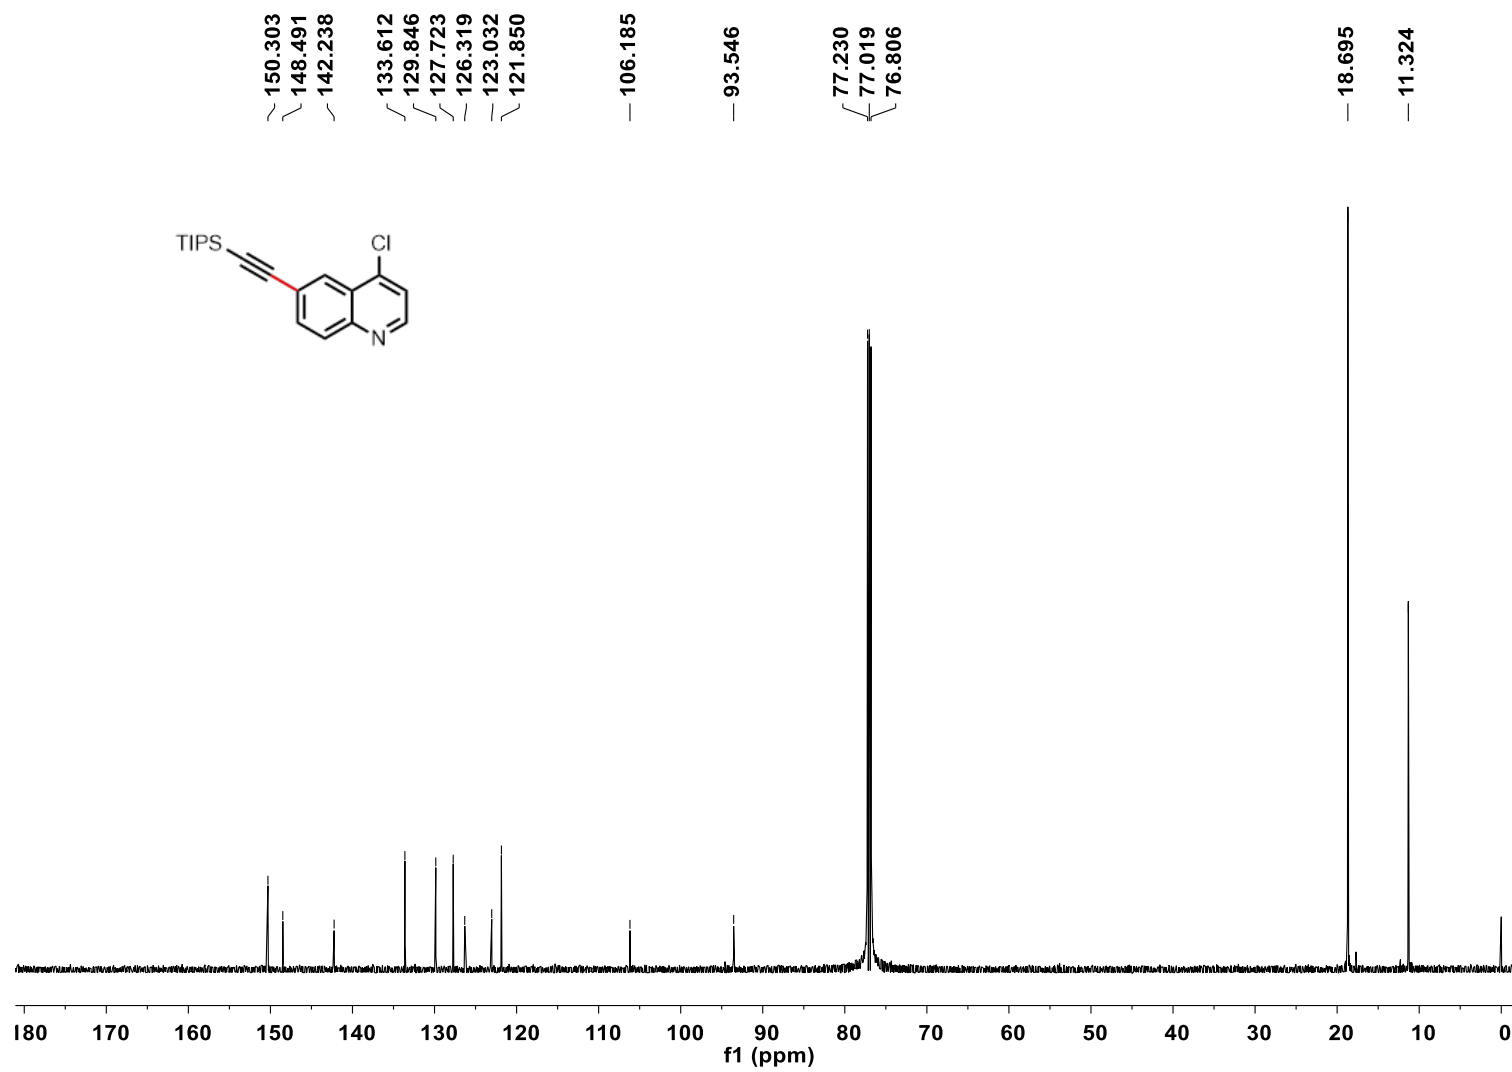





<sup>13</sup>C NMR (151 MHz, CDCl<sub>3</sub>) spectrum of **4f**

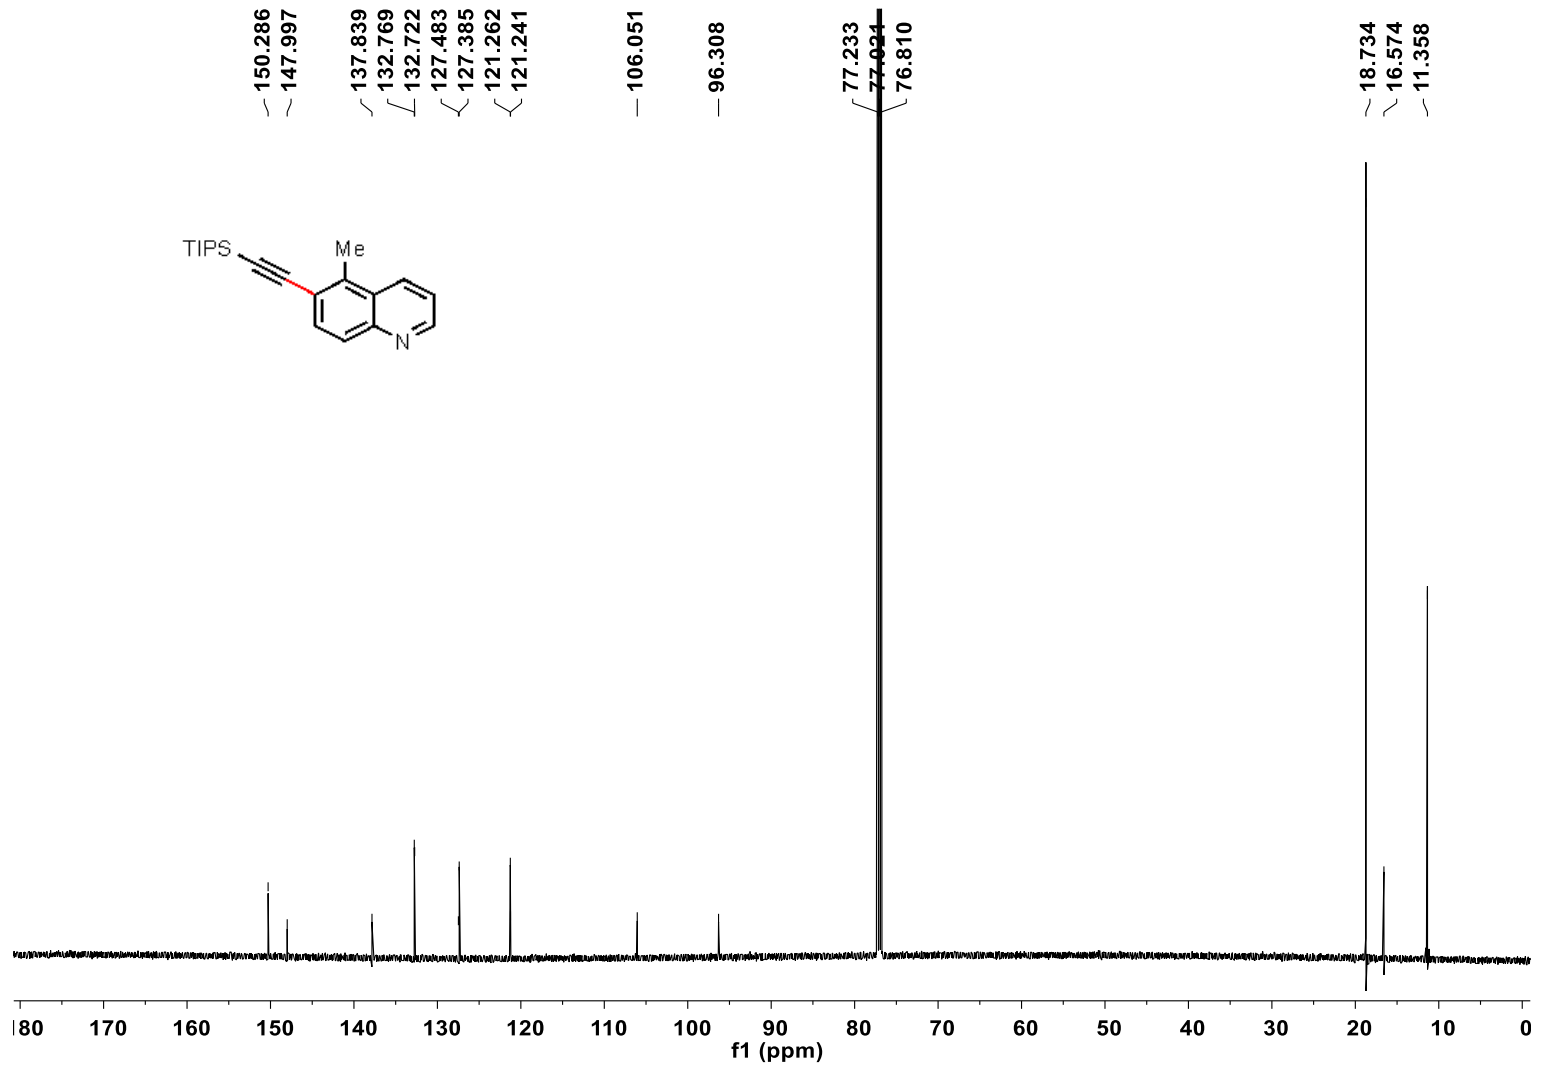

<sup>1</sup>H NMR (600 MHz, CDCl<sub>3</sub>) spectrum of **4g**

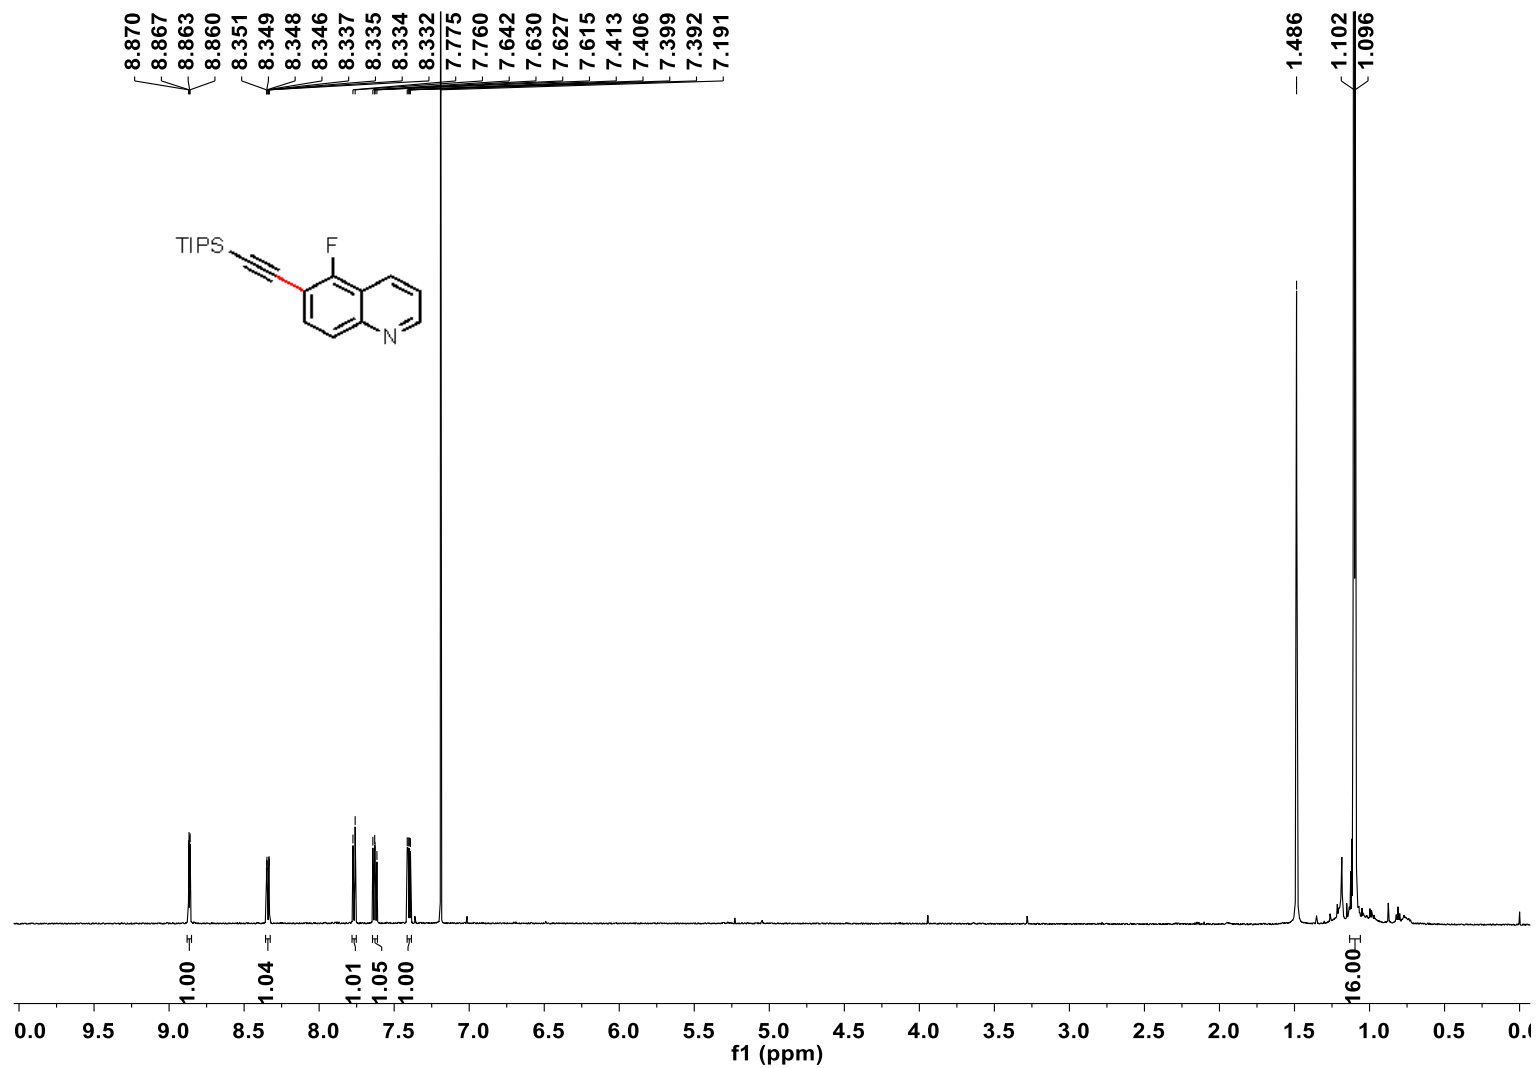

$^{13}\text{C}$  NMR (151 MHz,  $\text{CDCl}_3$ ) spectrum of **4g**

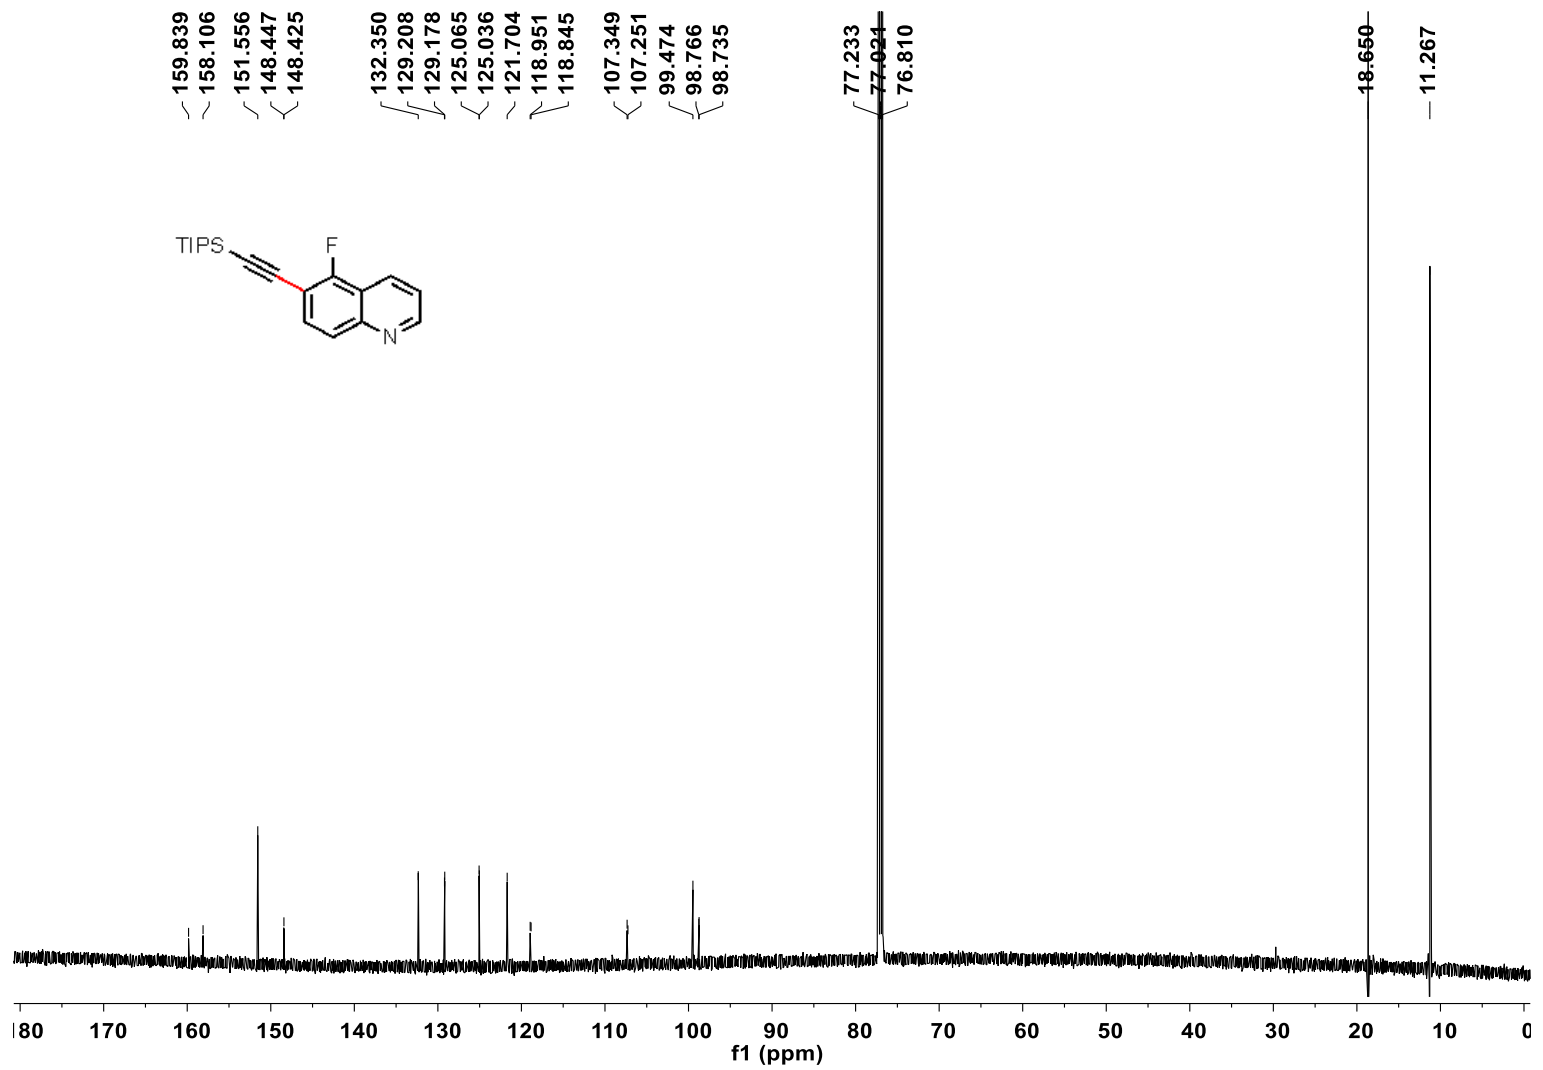

$^{19}\text{F}$  NMR (376 MHz,  $\text{CDCl}_3$ ) spectrum of **4g**

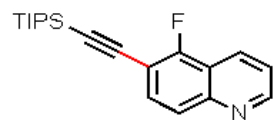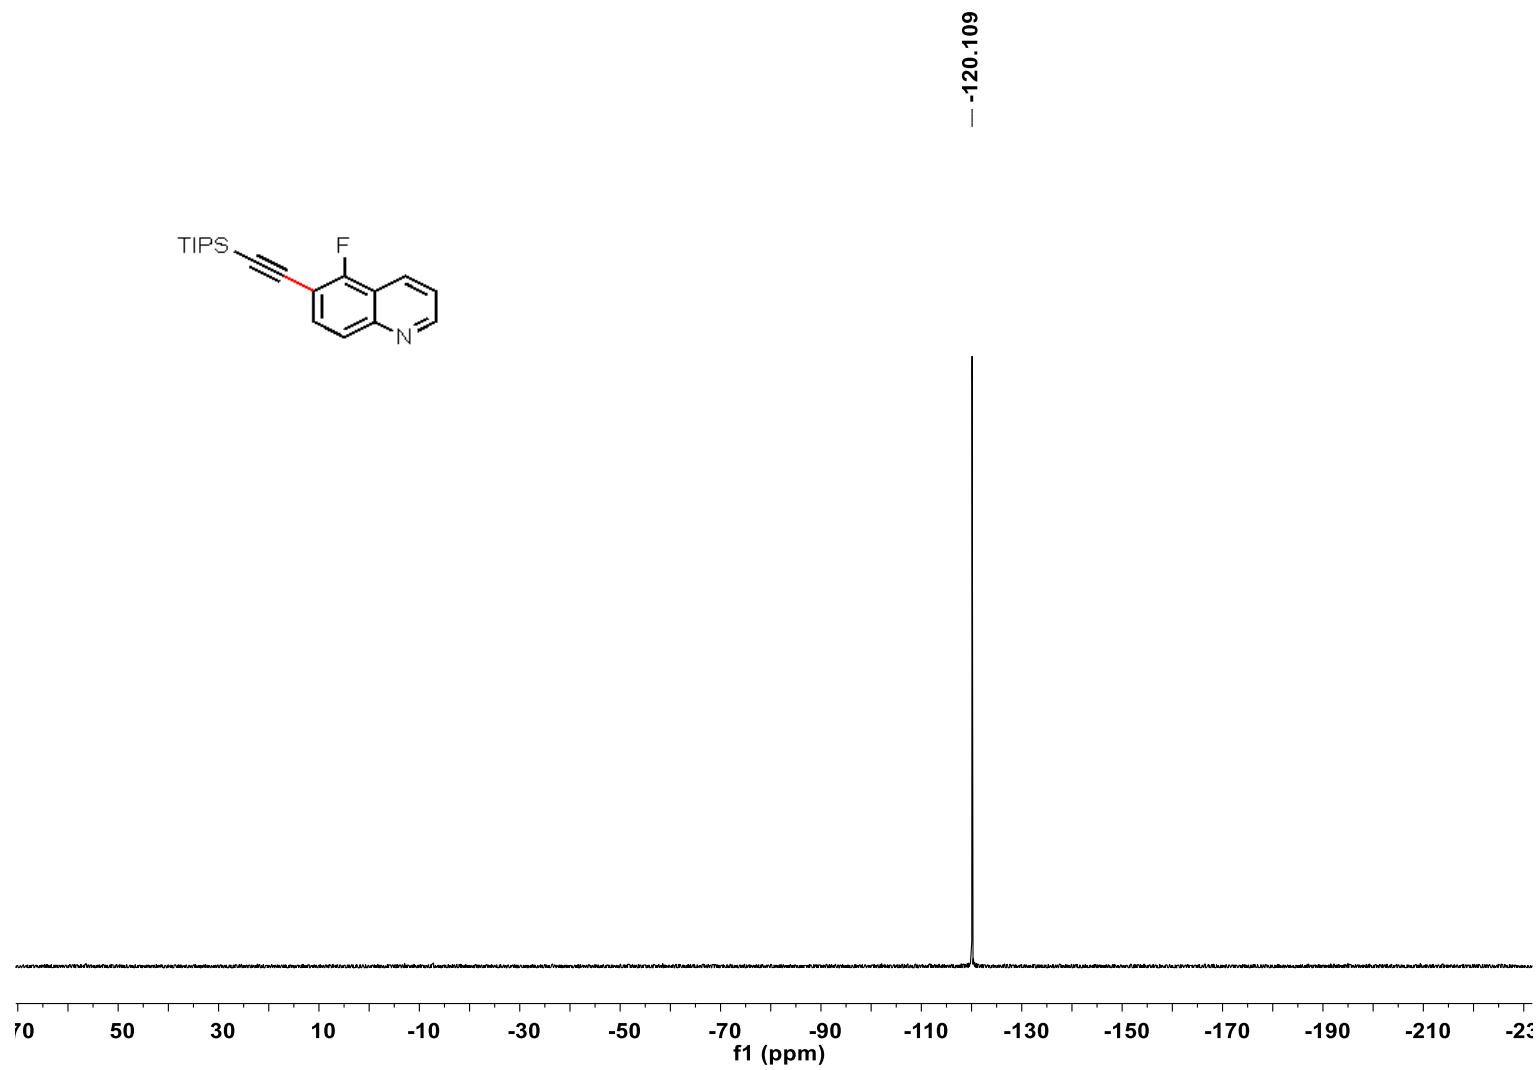

$^1\text{H}$  NMR (600 MHz,  $\text{CDCl}_3$ ) spectrum of **4h**

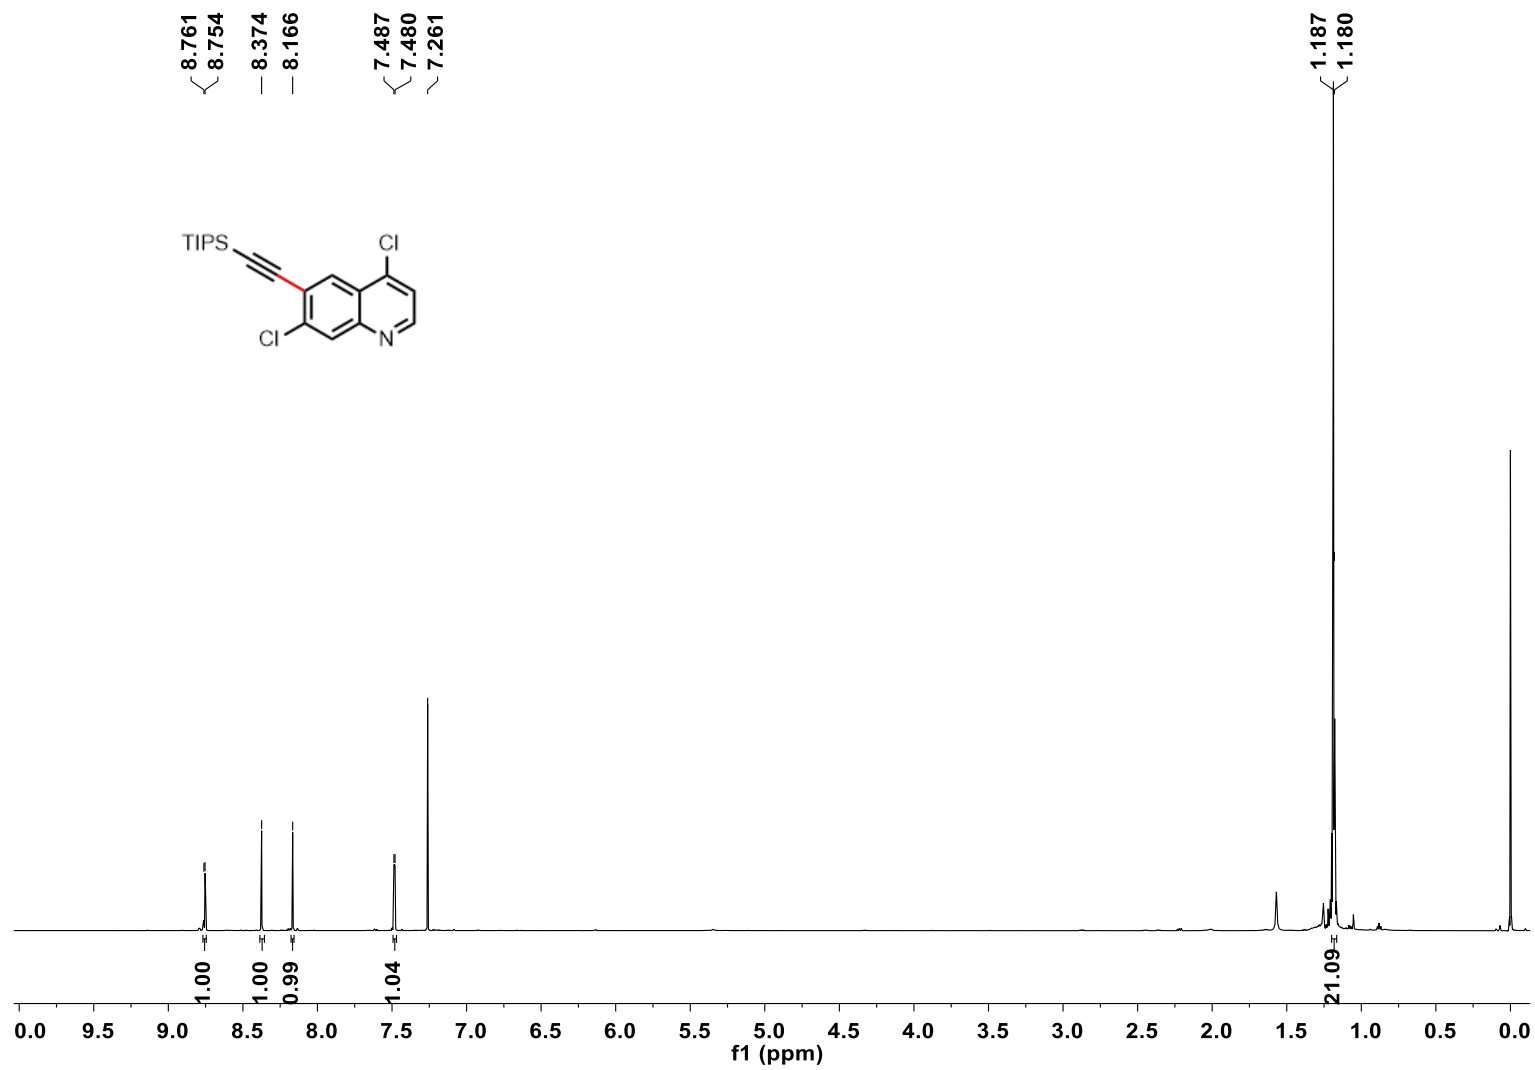

<sup>13</sup>C NMR (151 MHz, CDCl<sub>3</sub>) spectrum of **4h**

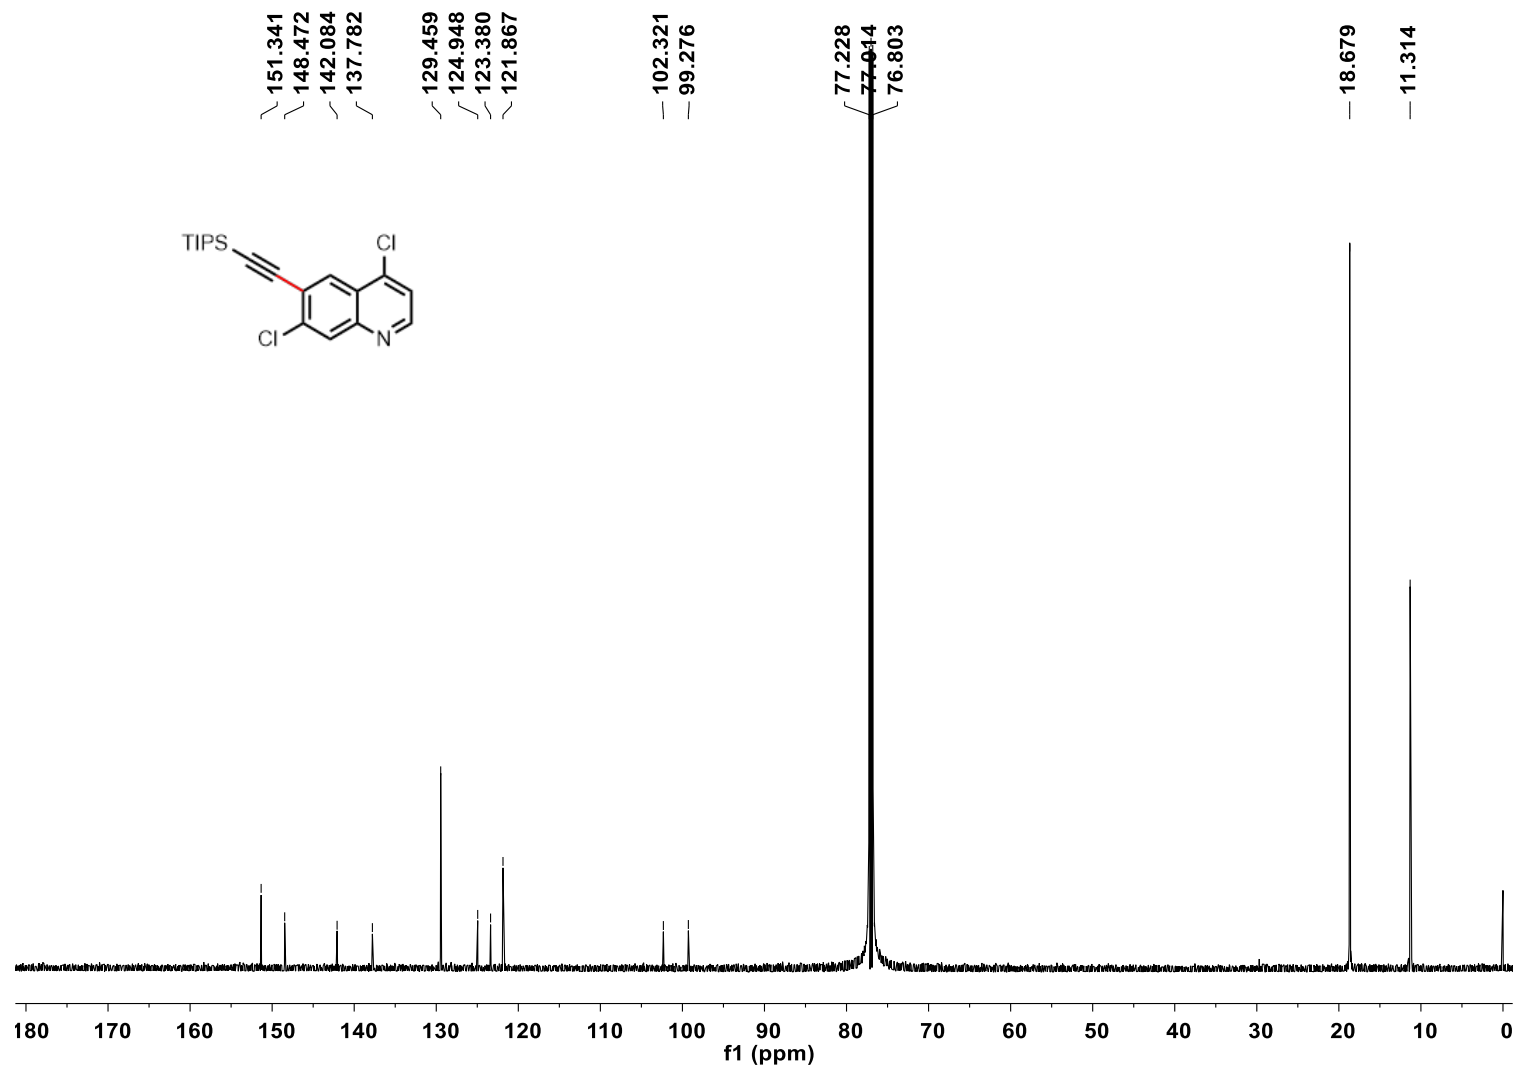

<sup>1</sup>H NMR (600 MHz, CDCl<sub>3</sub>) spectrum of **4h'**

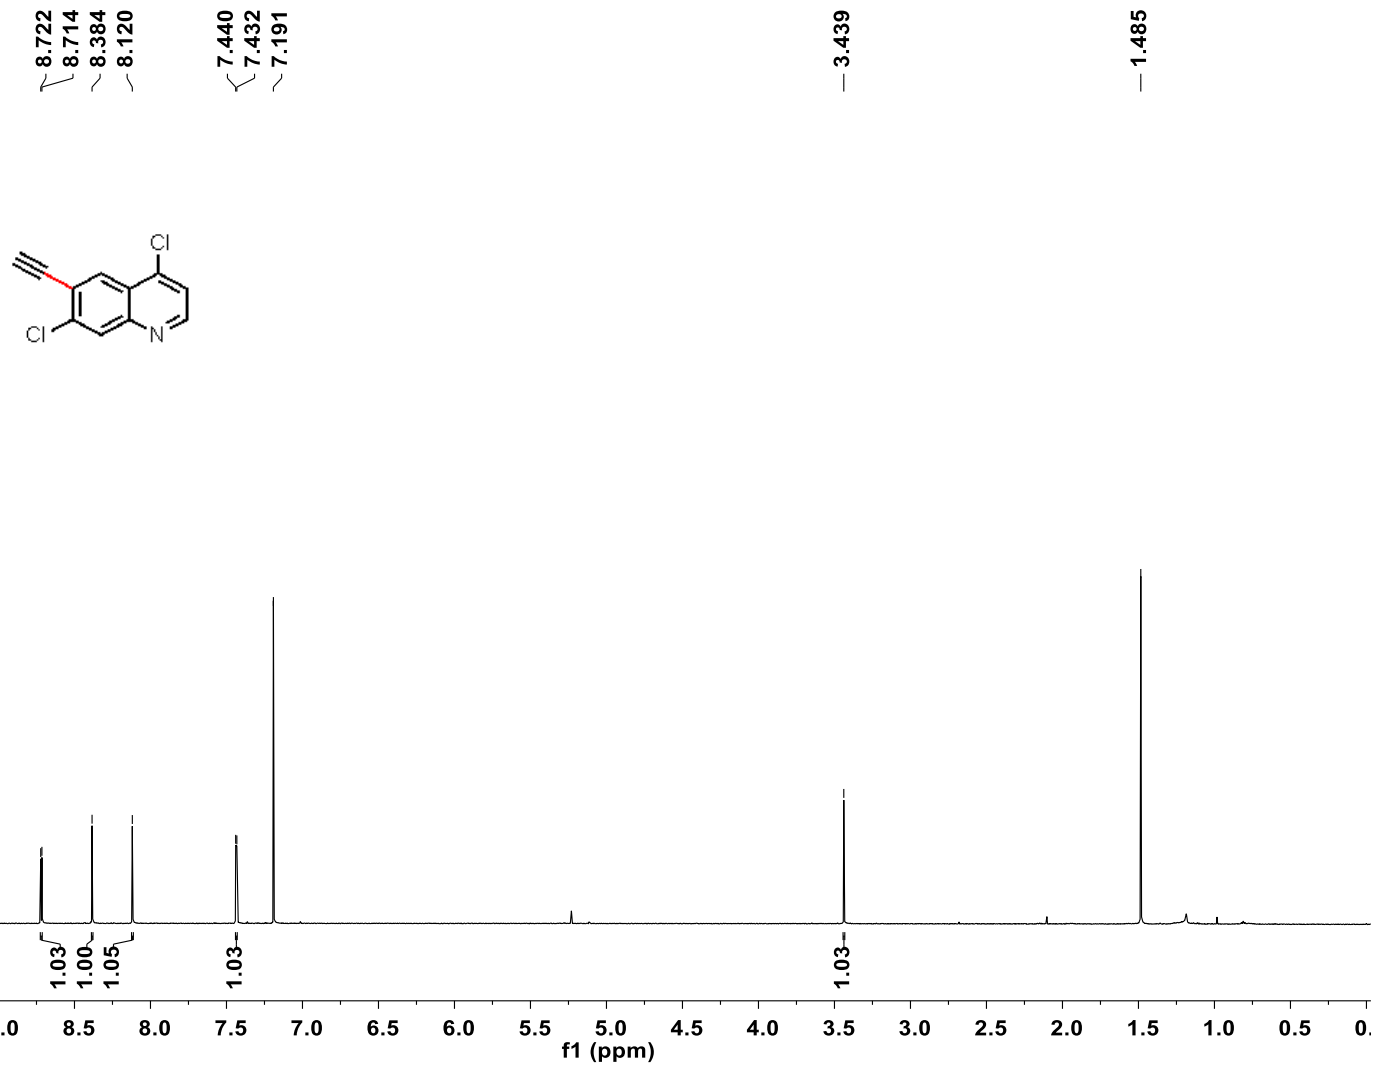

<sup>13</sup>C NMR (151 MHz, CDCl<sub>3</sub>) spectrum of **4h'**

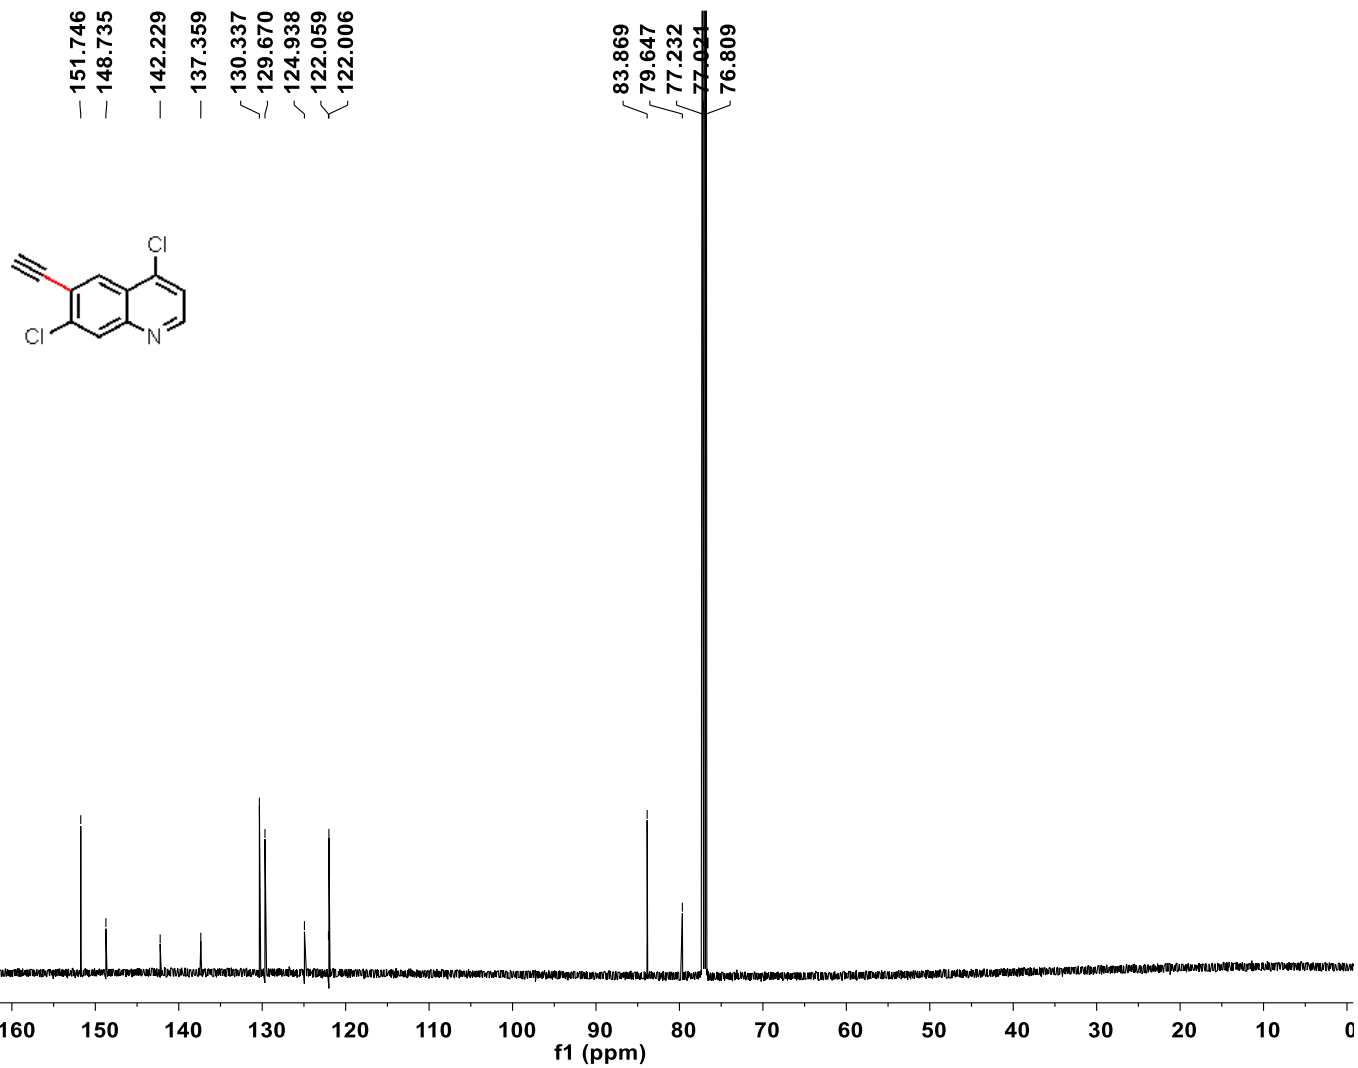



<sup>1</sup>H NMR (600 MHz, CDCl<sub>3</sub>) spectrum of **4i**

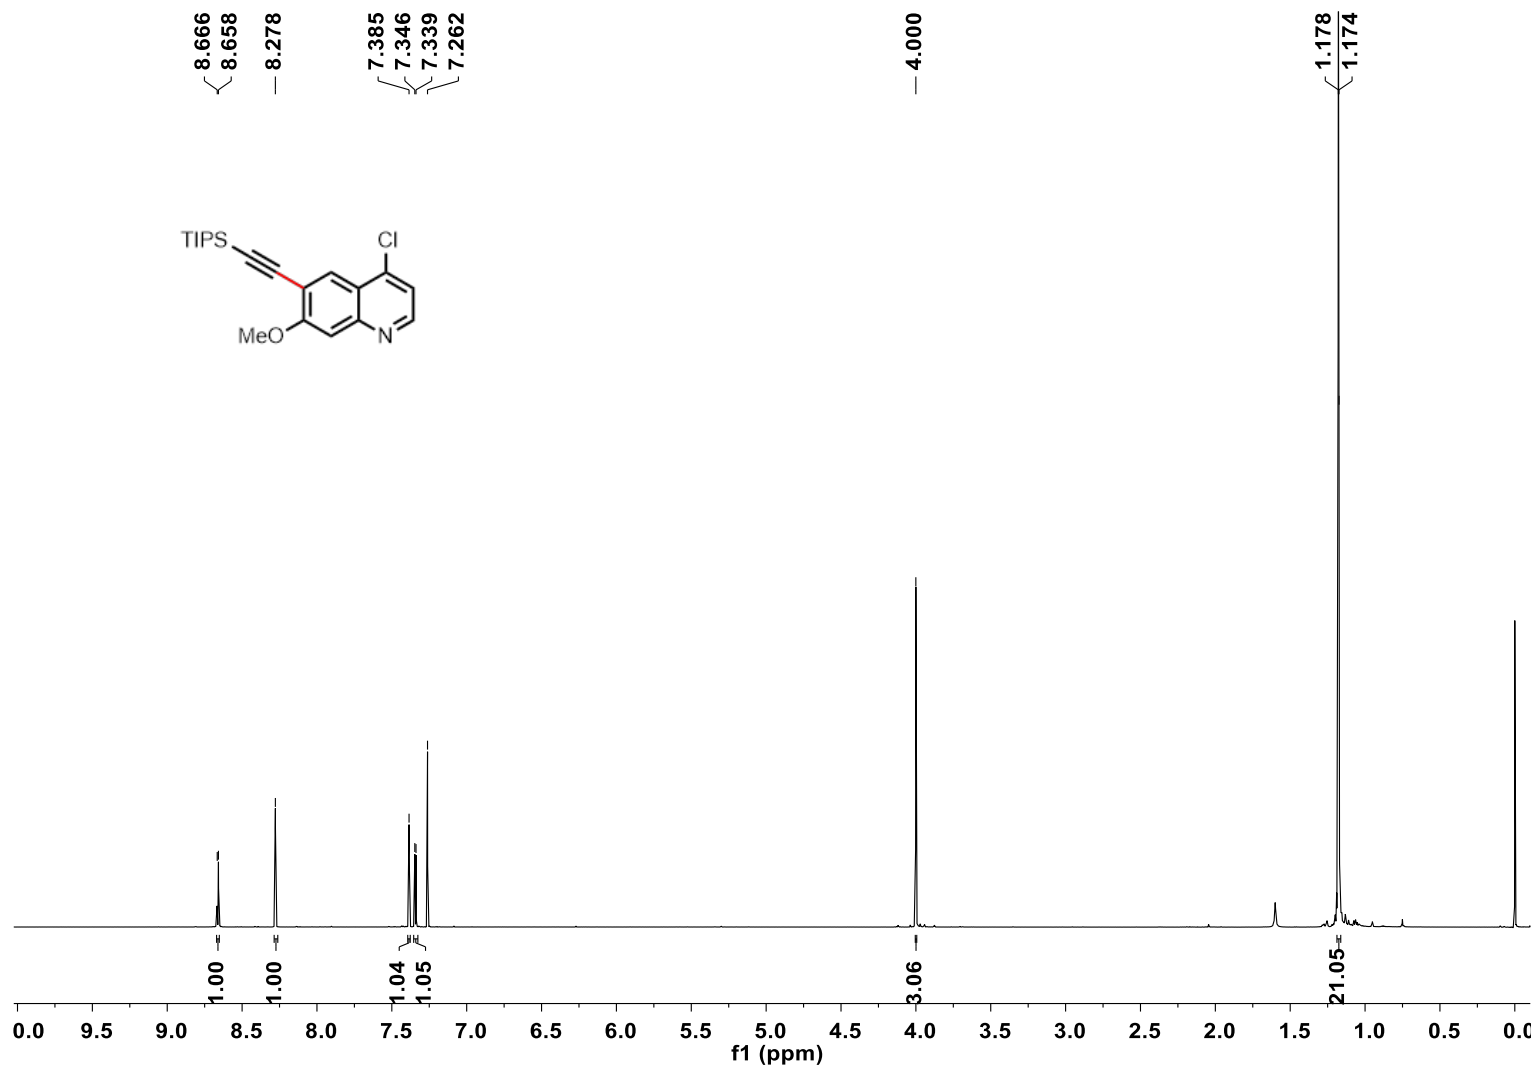

$^{13}\text{C}$  NMR (151 MHz,  $\text{CDCl}_3$ ) spectrum of **4i**

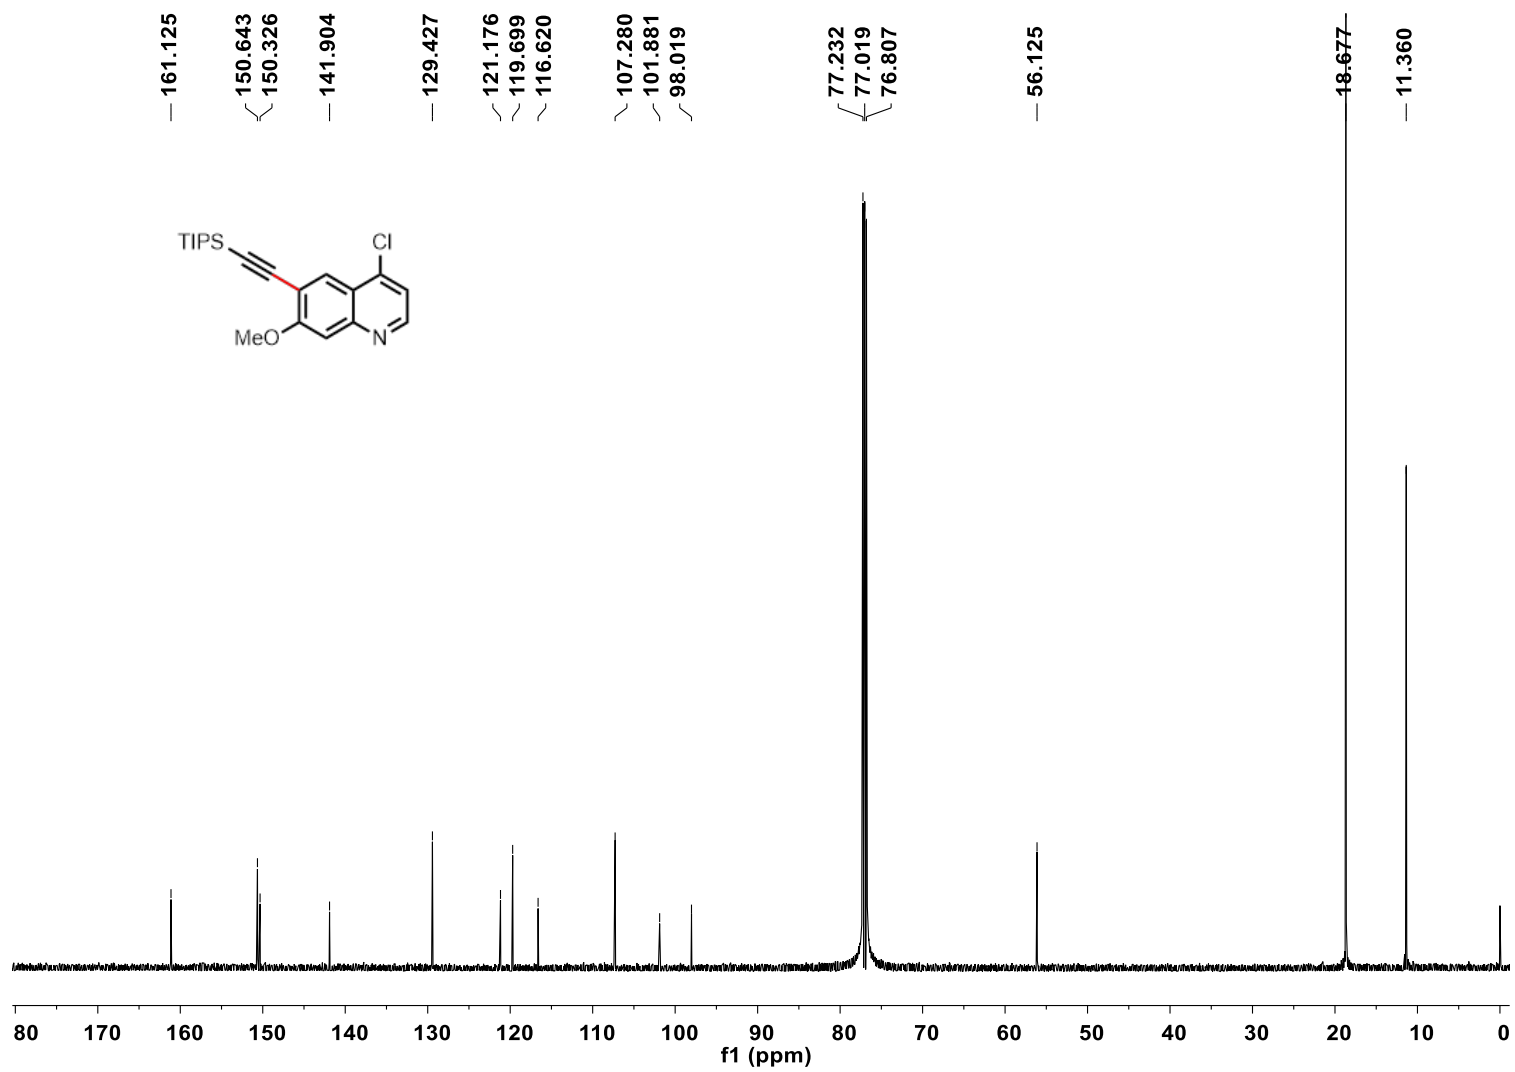

<sup>1</sup>H NMR (600 MHz, CDCl<sub>3</sub>) spectrum of **4j**

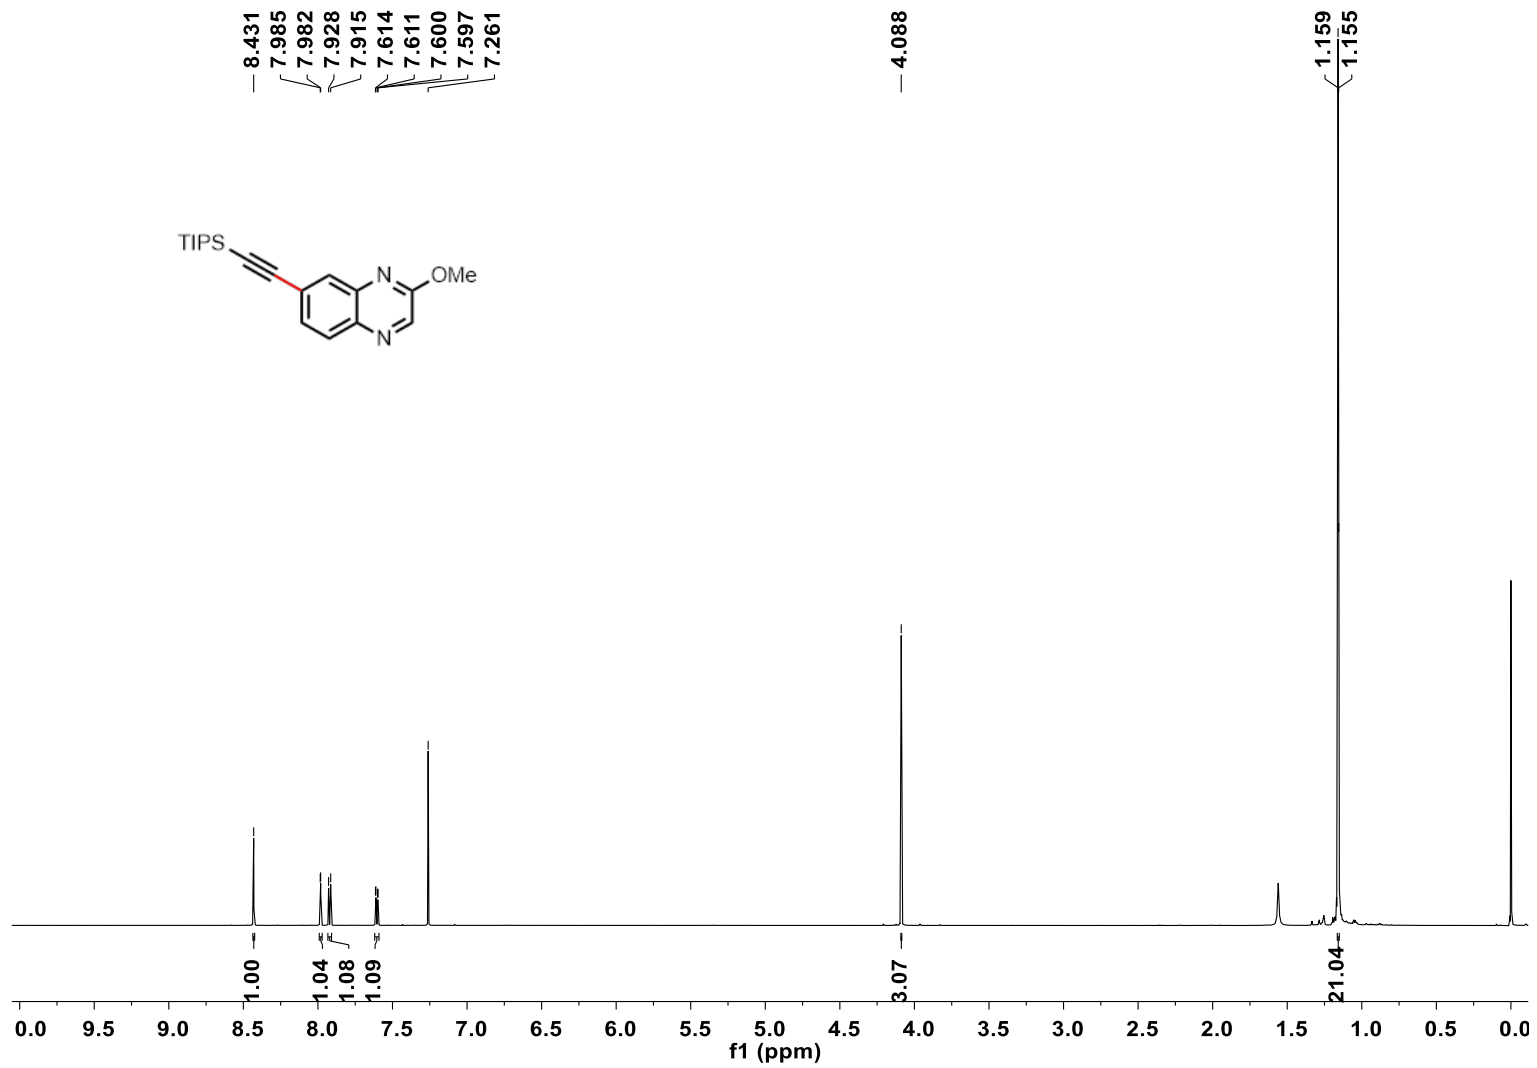

$^{13}\text{C}$  NMR (151 MHz,  $\text{CDCl}_3$ ) spectrum of **4j**

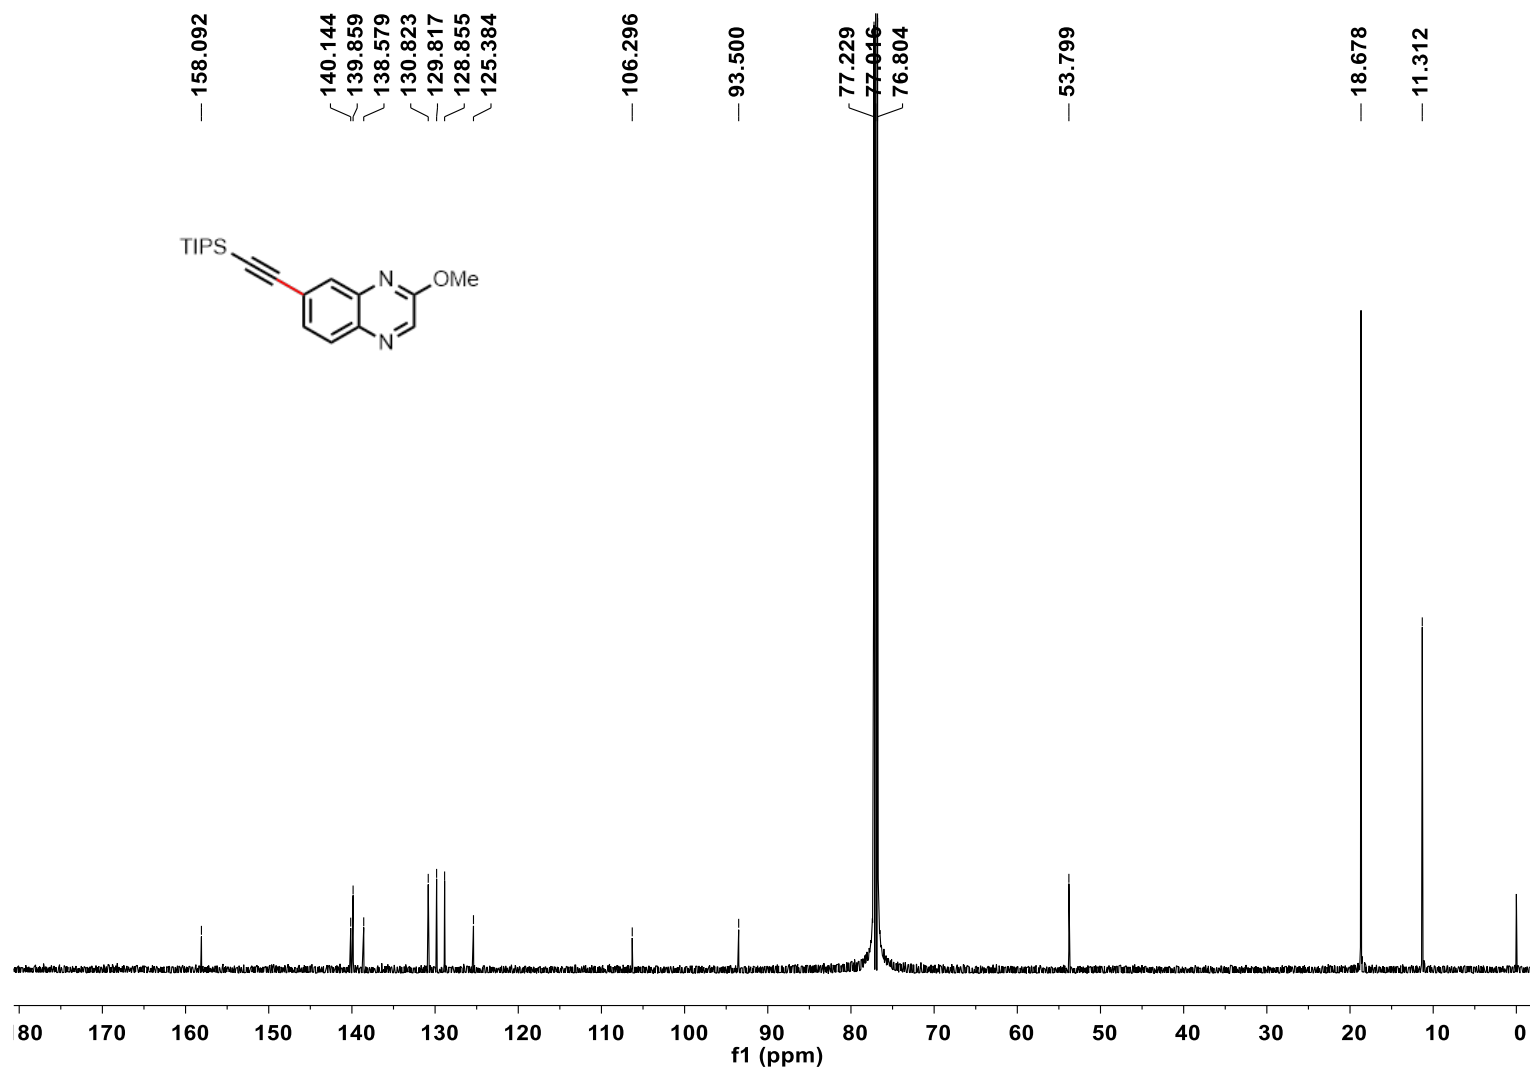

<sup>1</sup>H NMR (600 MHz, CDCl<sub>3</sub>) spectrum of **5a**

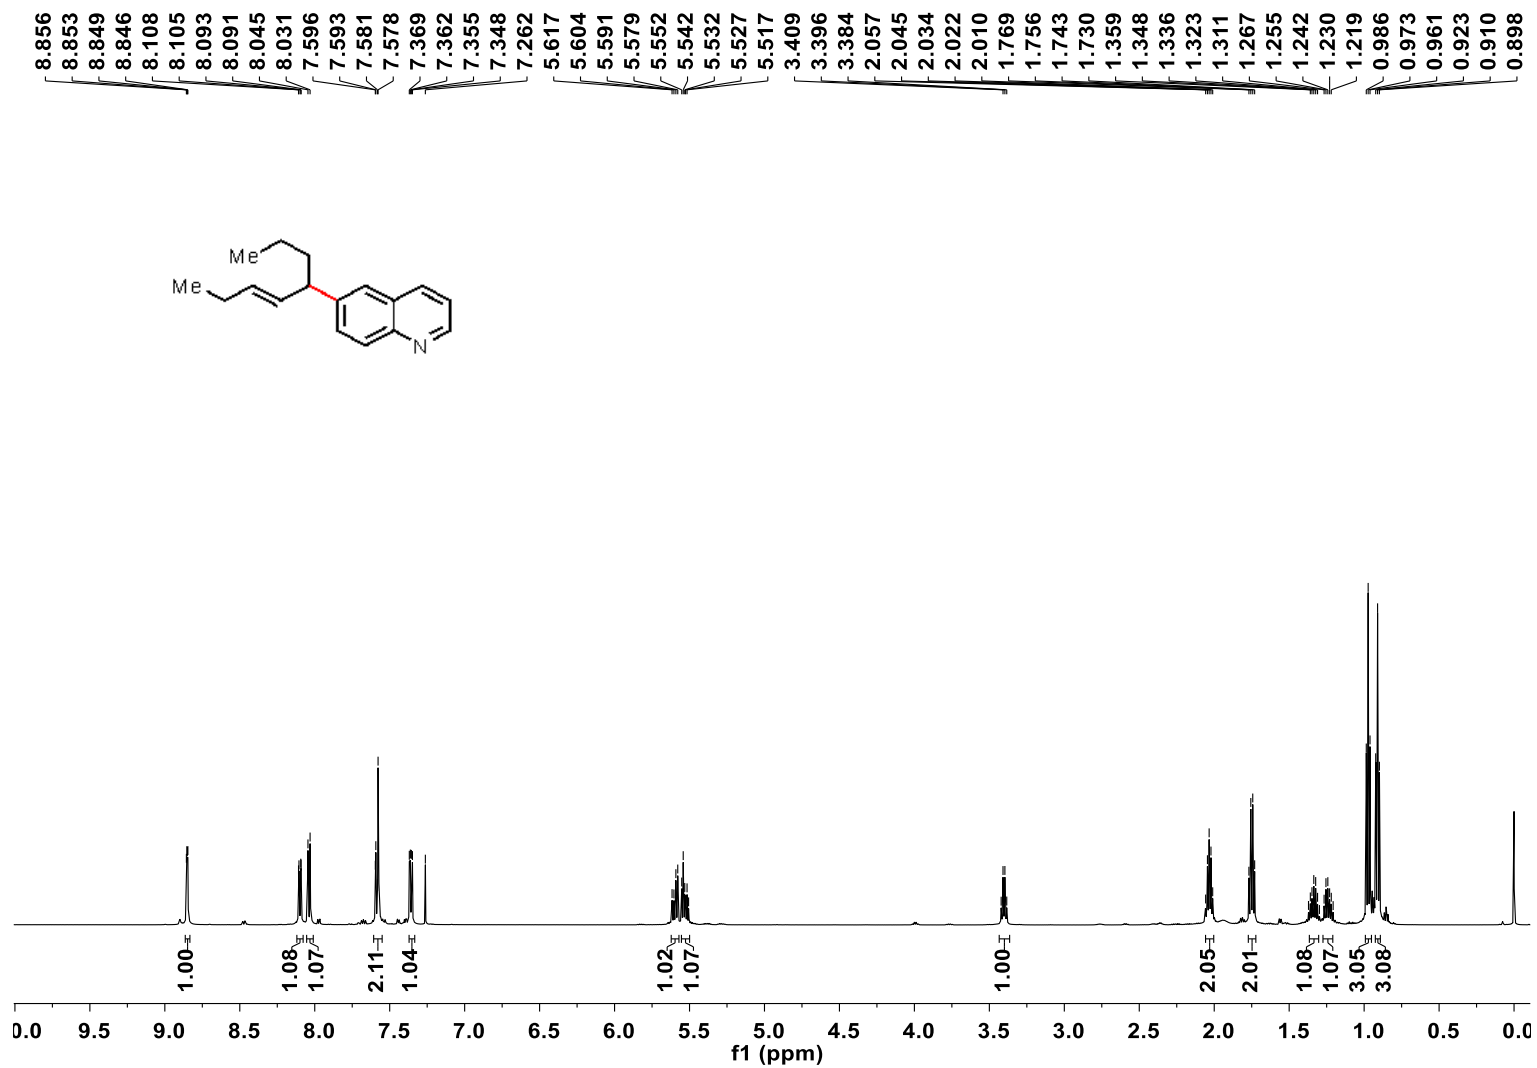

$^{13}\text{C}$  NMR (151 MHz,  $\text{CDCl}_3$ ) spectrum of **5a**

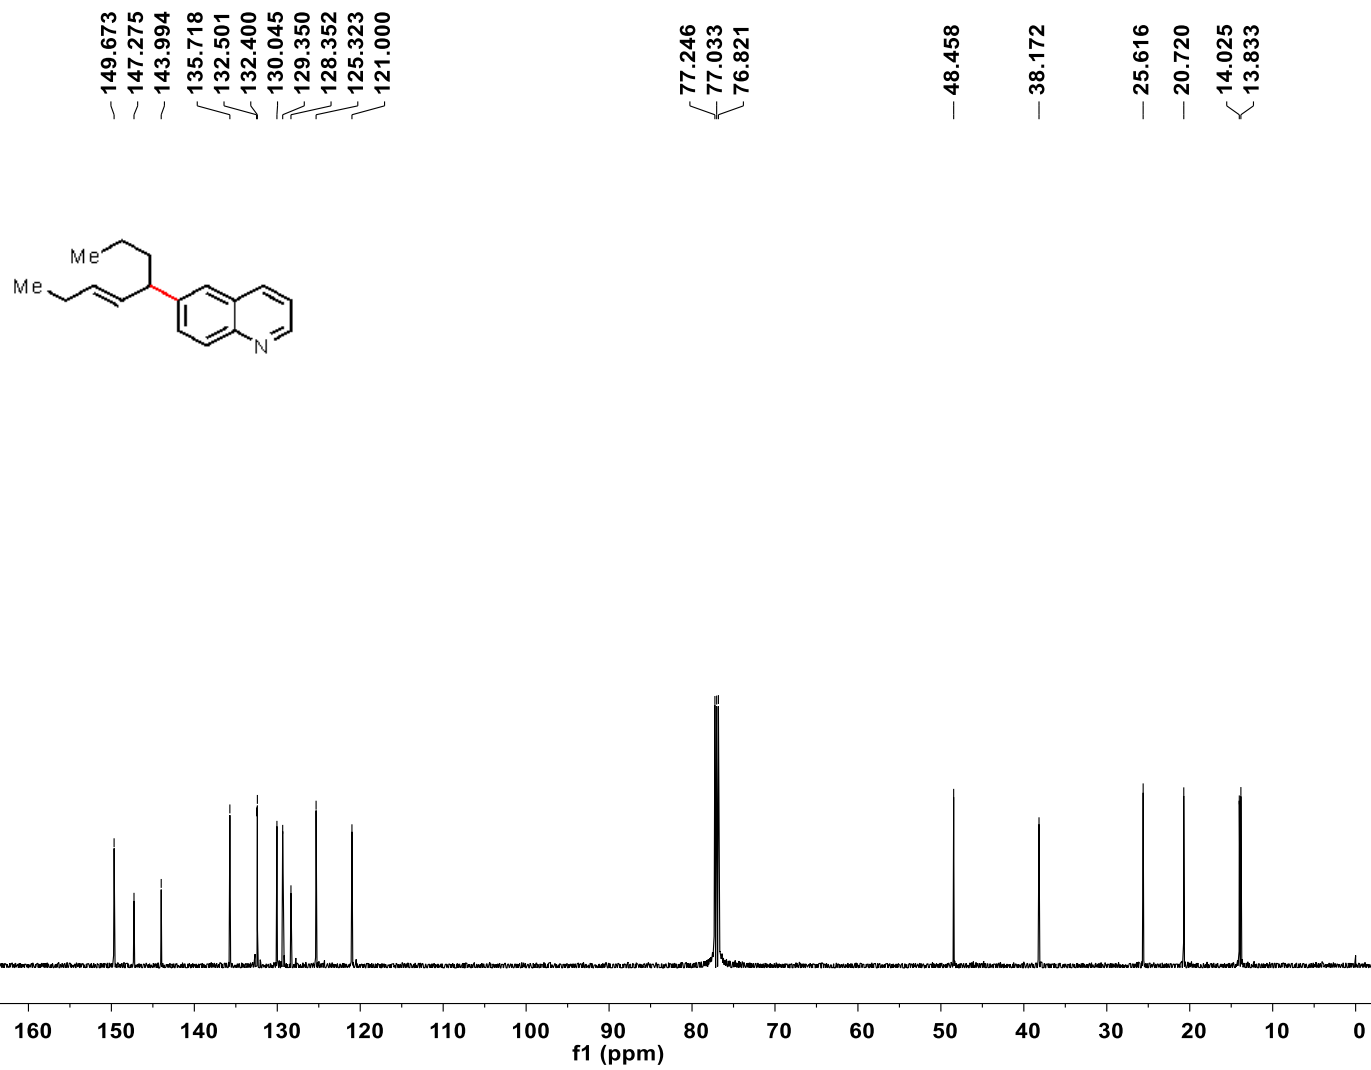

<sup>1</sup>H NMR (600 MHz, CDCl<sub>3</sub>) spectrum of **5b**

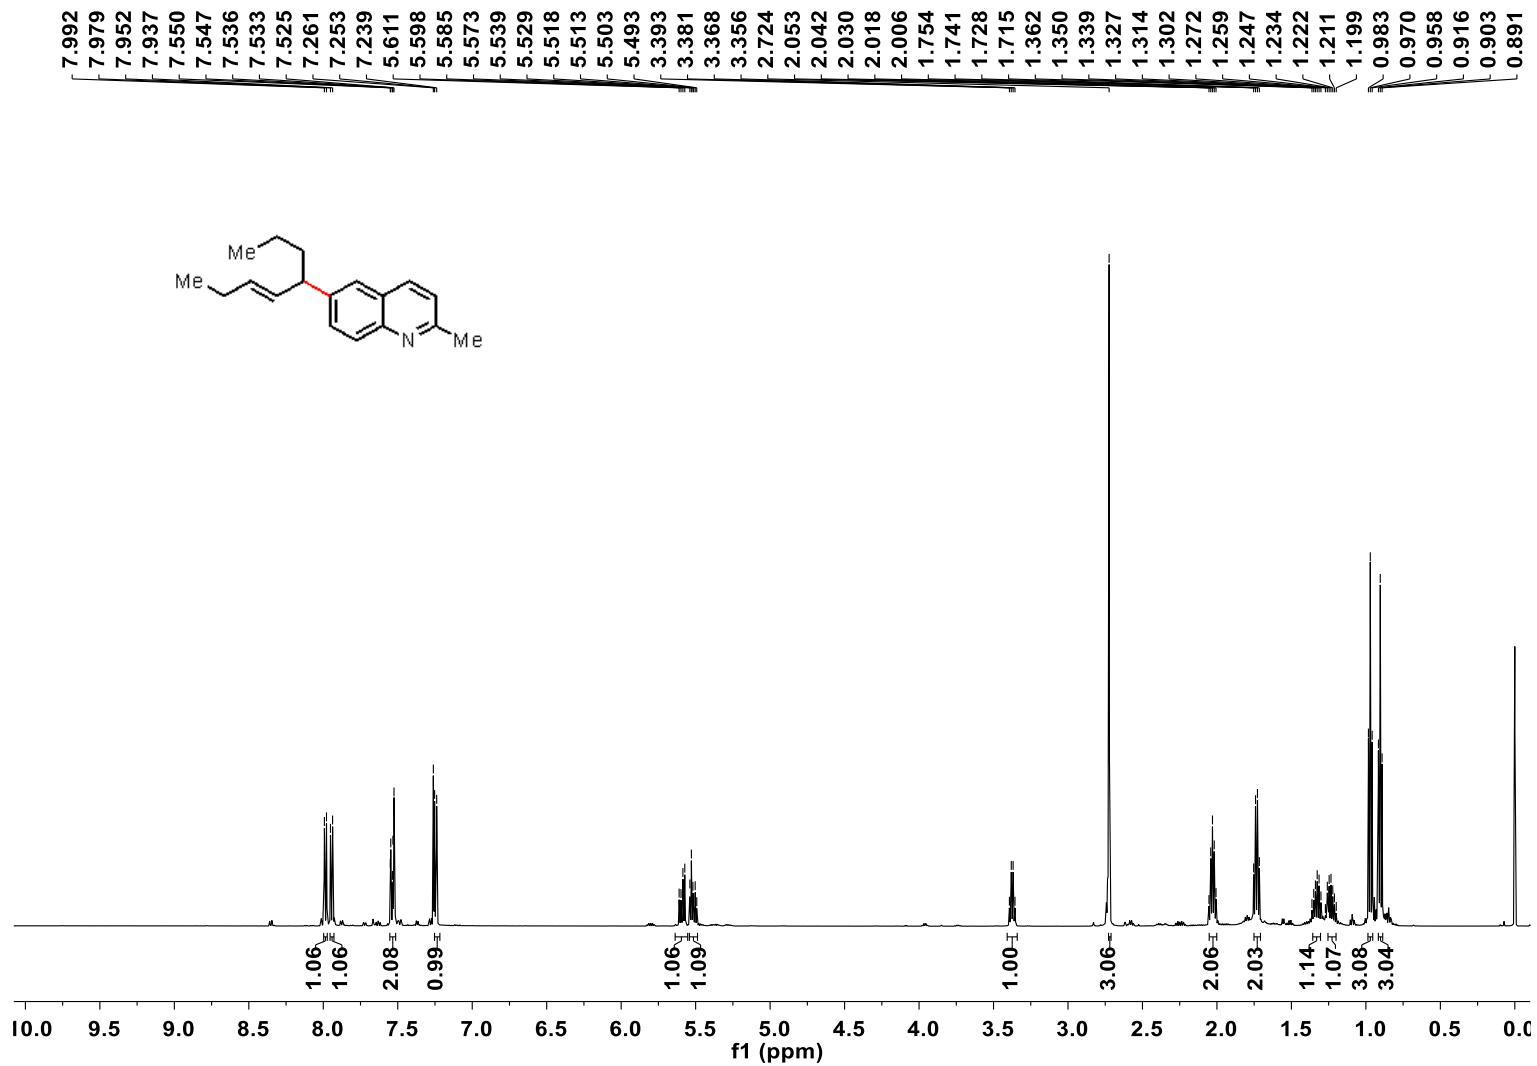

$^{13}\text{C}$  NMR (151 MHz,  $\text{CDCl}_3$ ) spectrum of **5b**

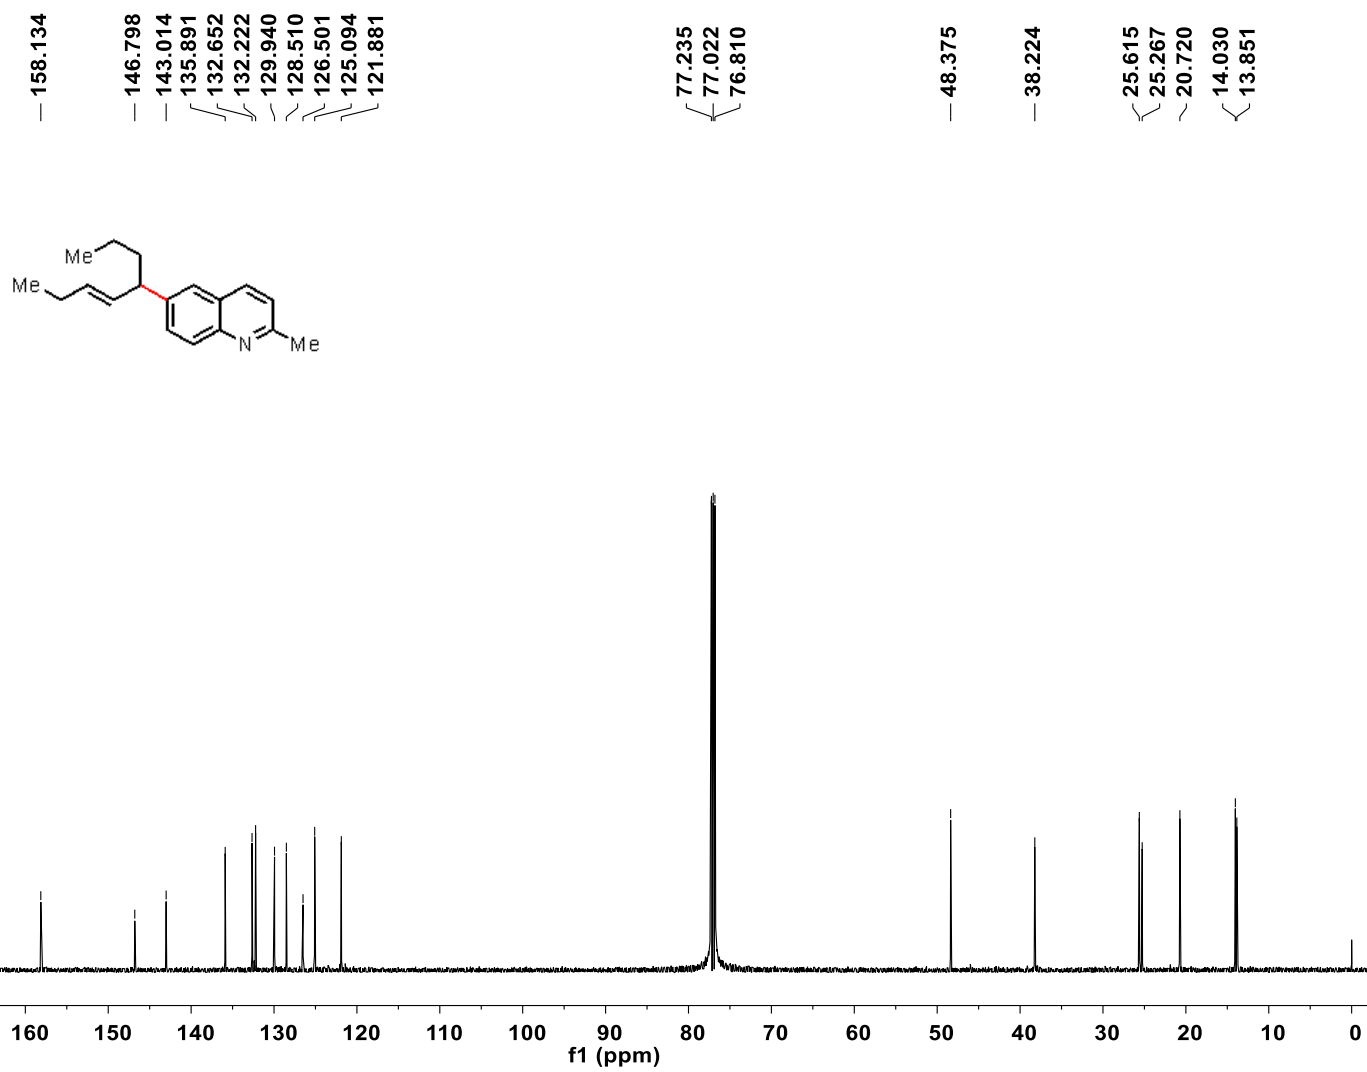



<sup>1</sup>H NMR (600 MHz, CDCl<sub>3</sub>) spectrum of 5c

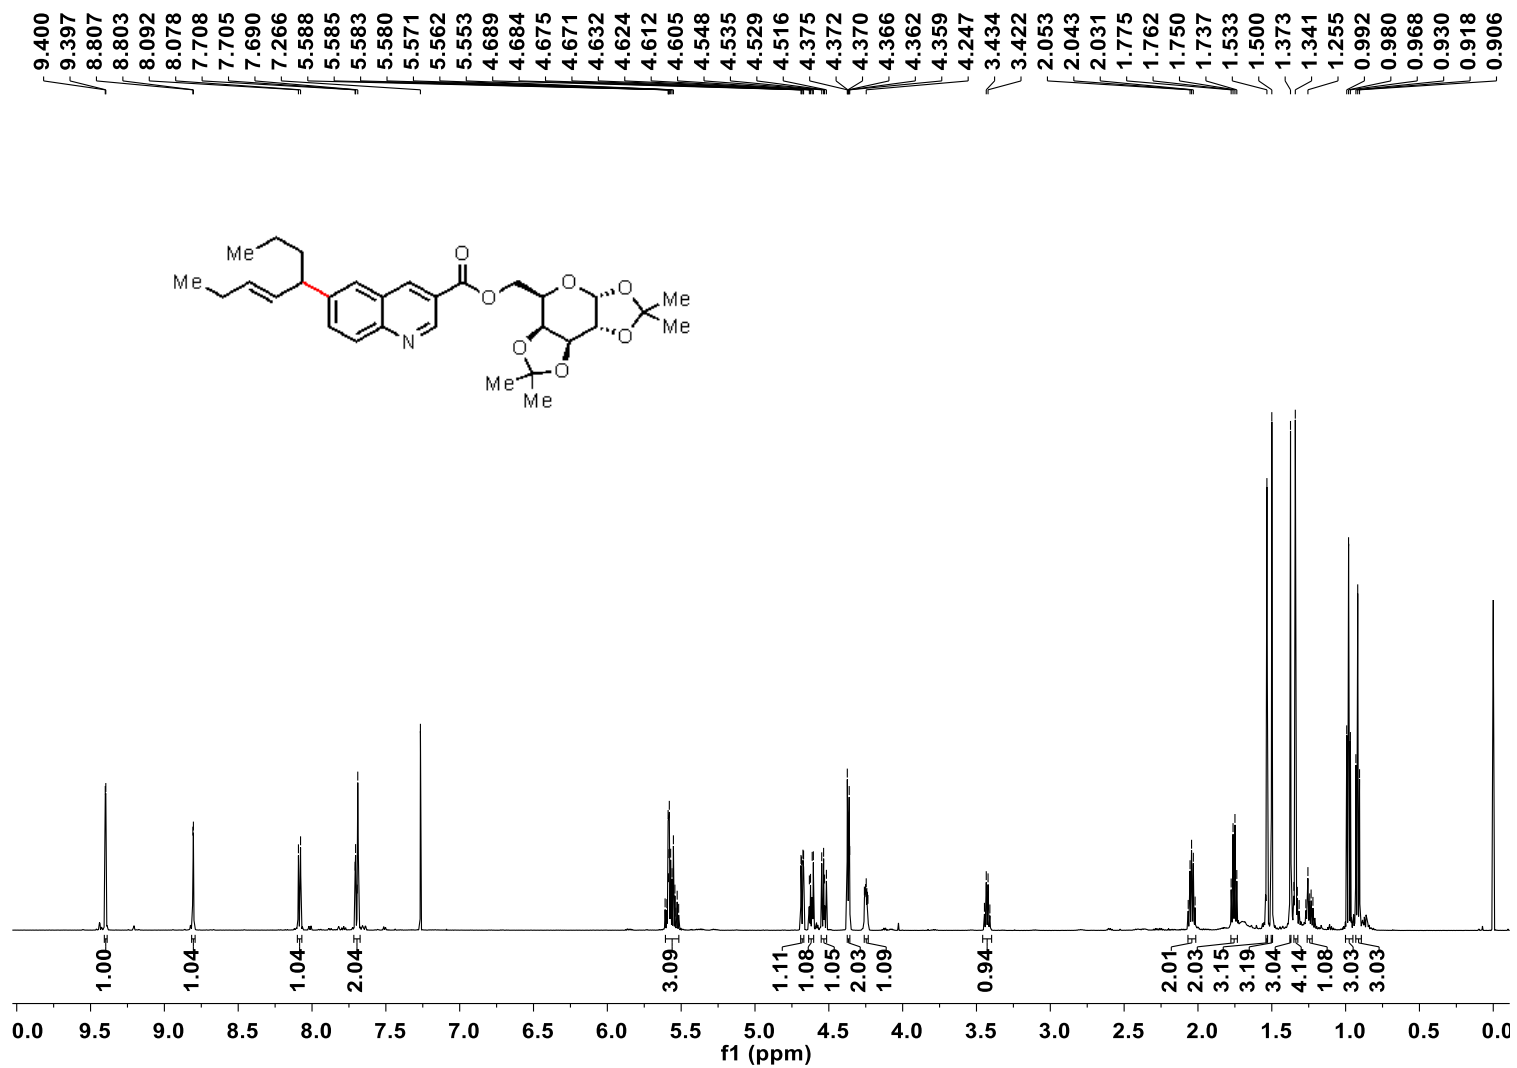

$^{13}\text{C}$  NMR (151 MHz,  $\text{CDCl}_3$ ) spectrum of **5c**

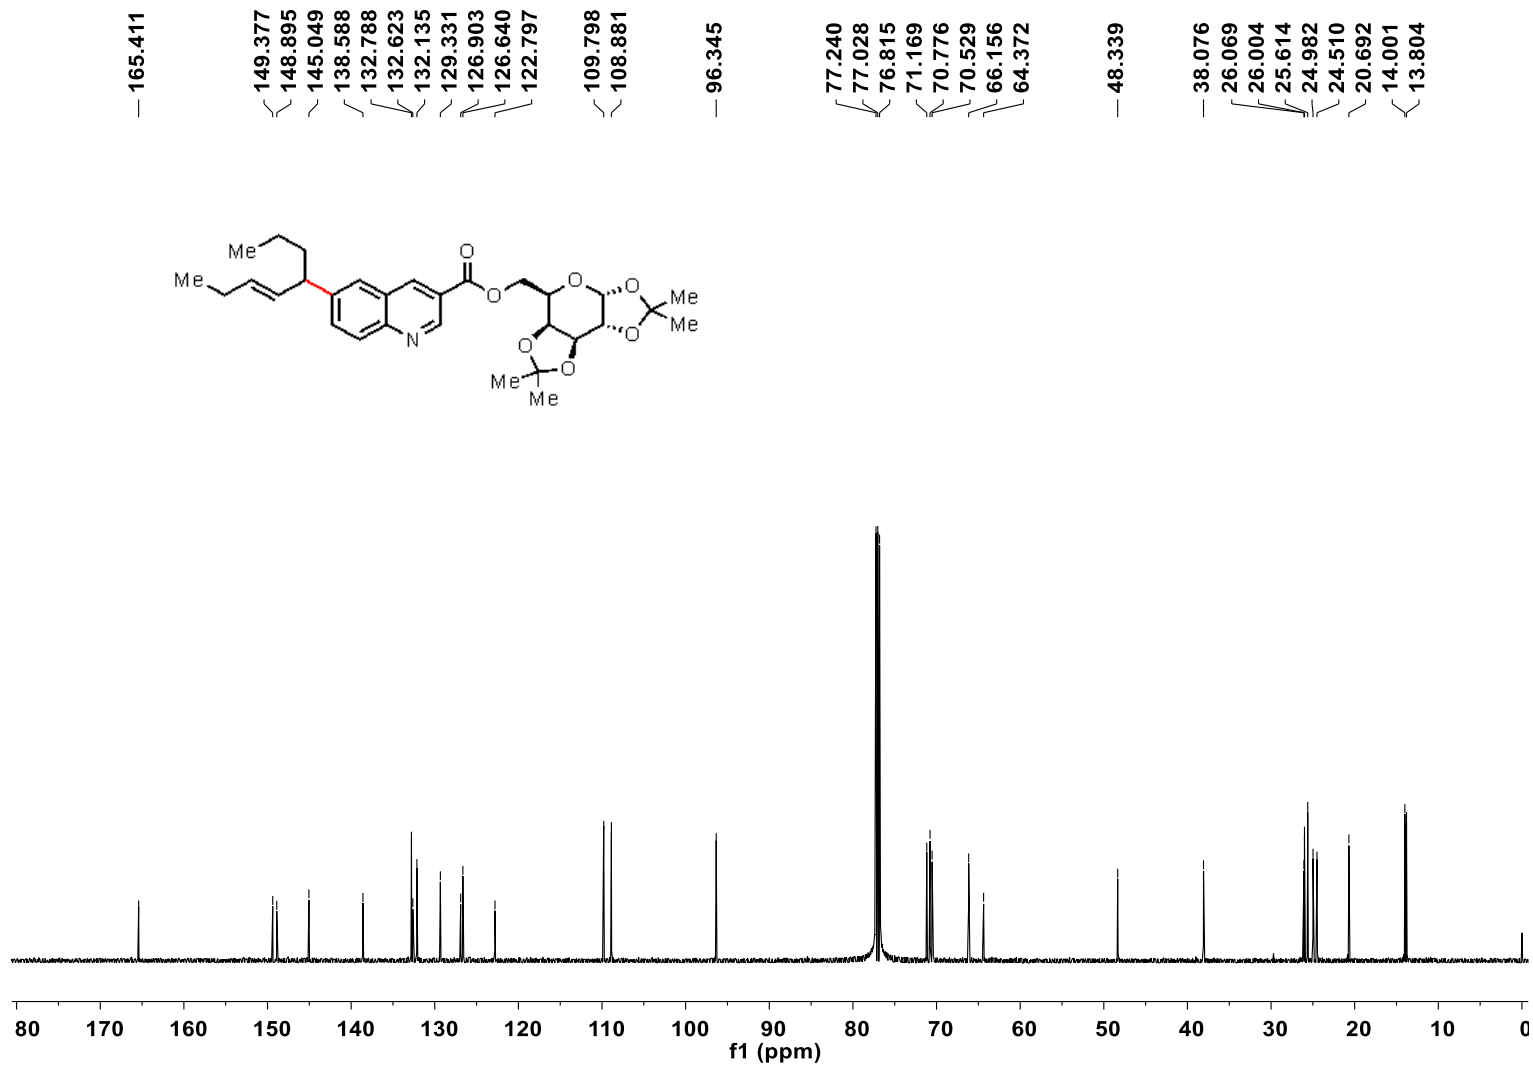

<sup>1</sup>H NMR (600 MHz, CDCl<sub>3</sub>) spectrum of **5d**

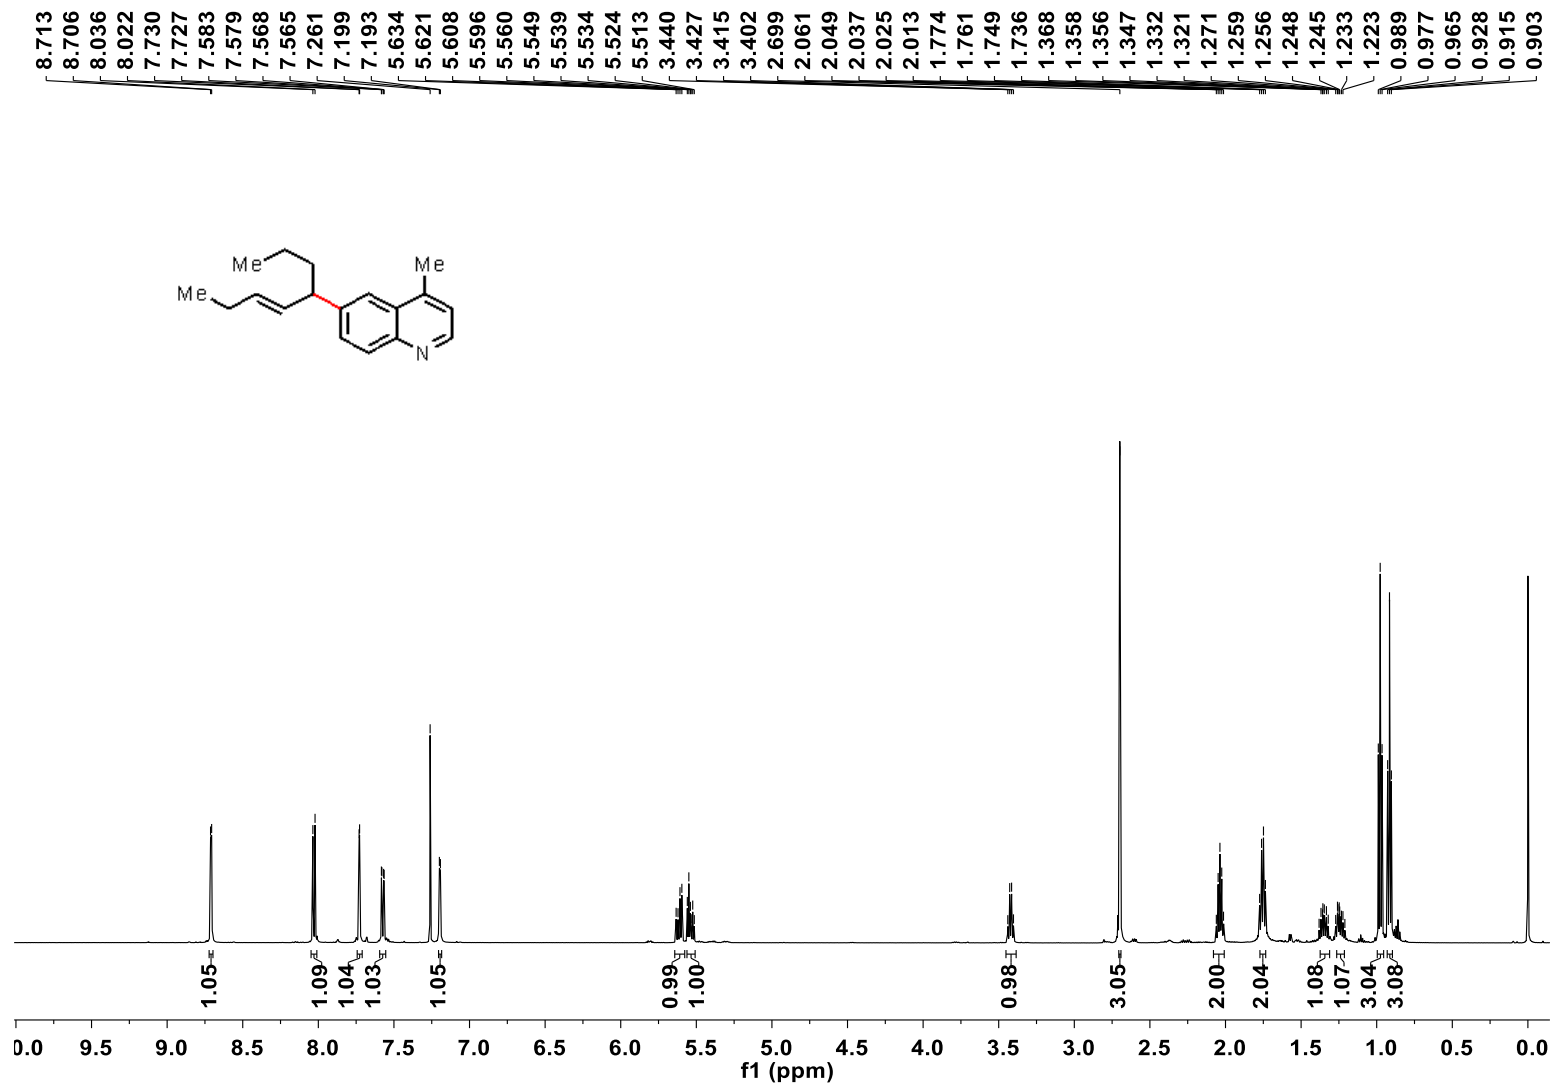

$^{13}\text{C}$  NMR (151 MHz,  $\text{CDCl}_3$ ) spectrum of **5d**

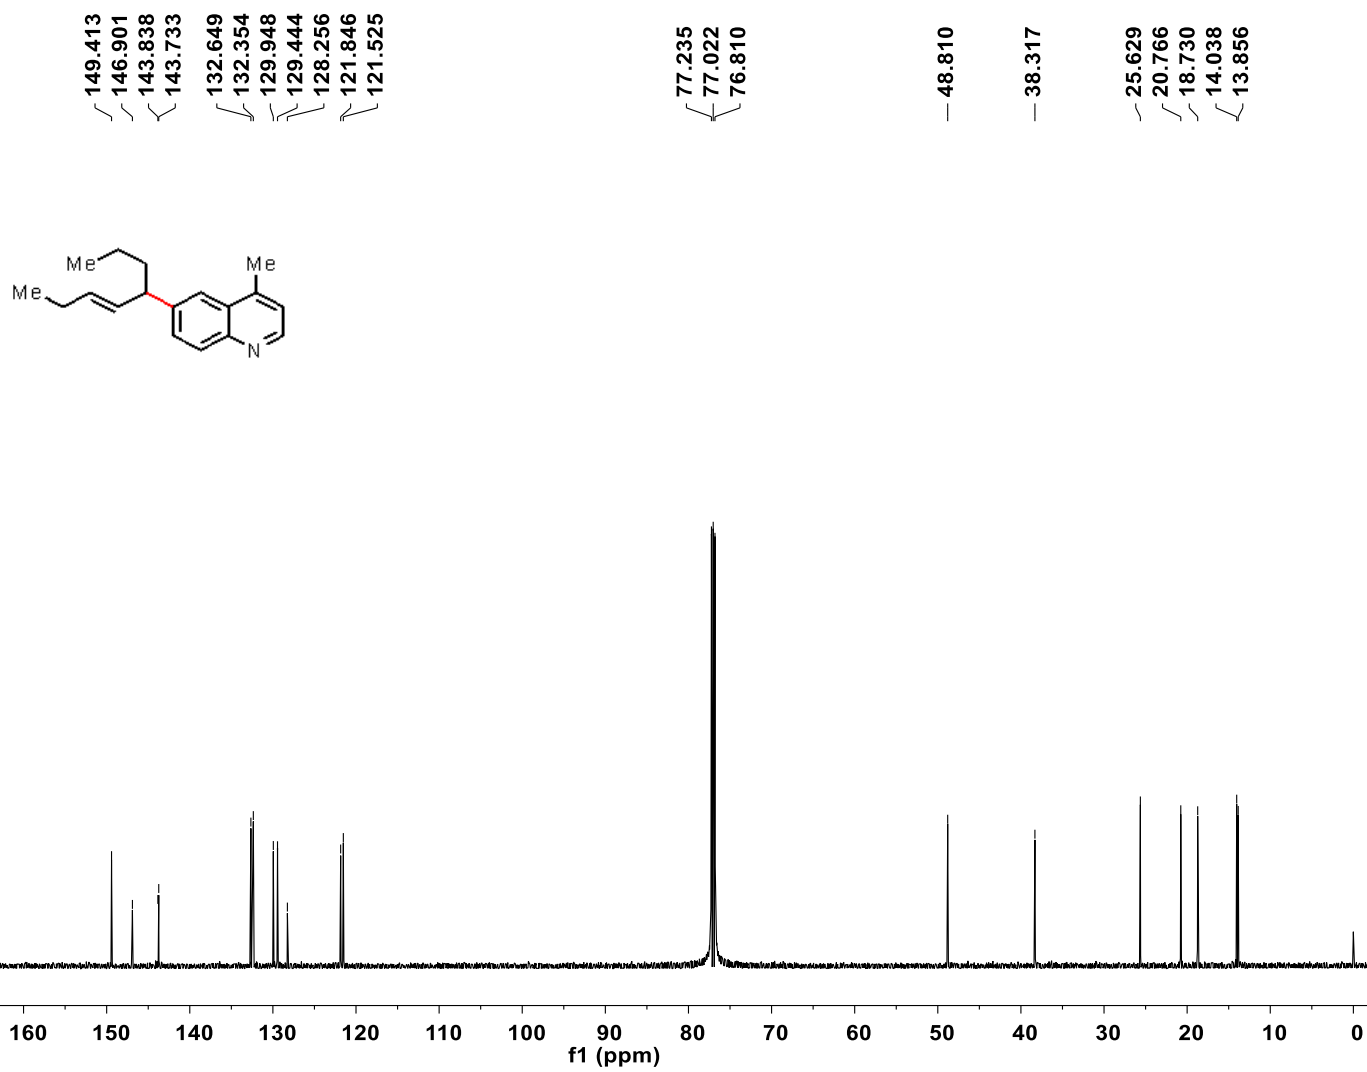

<sup>1</sup>H NMR (600 MHz, CDCl<sub>3</sub>) spectrum of 5e

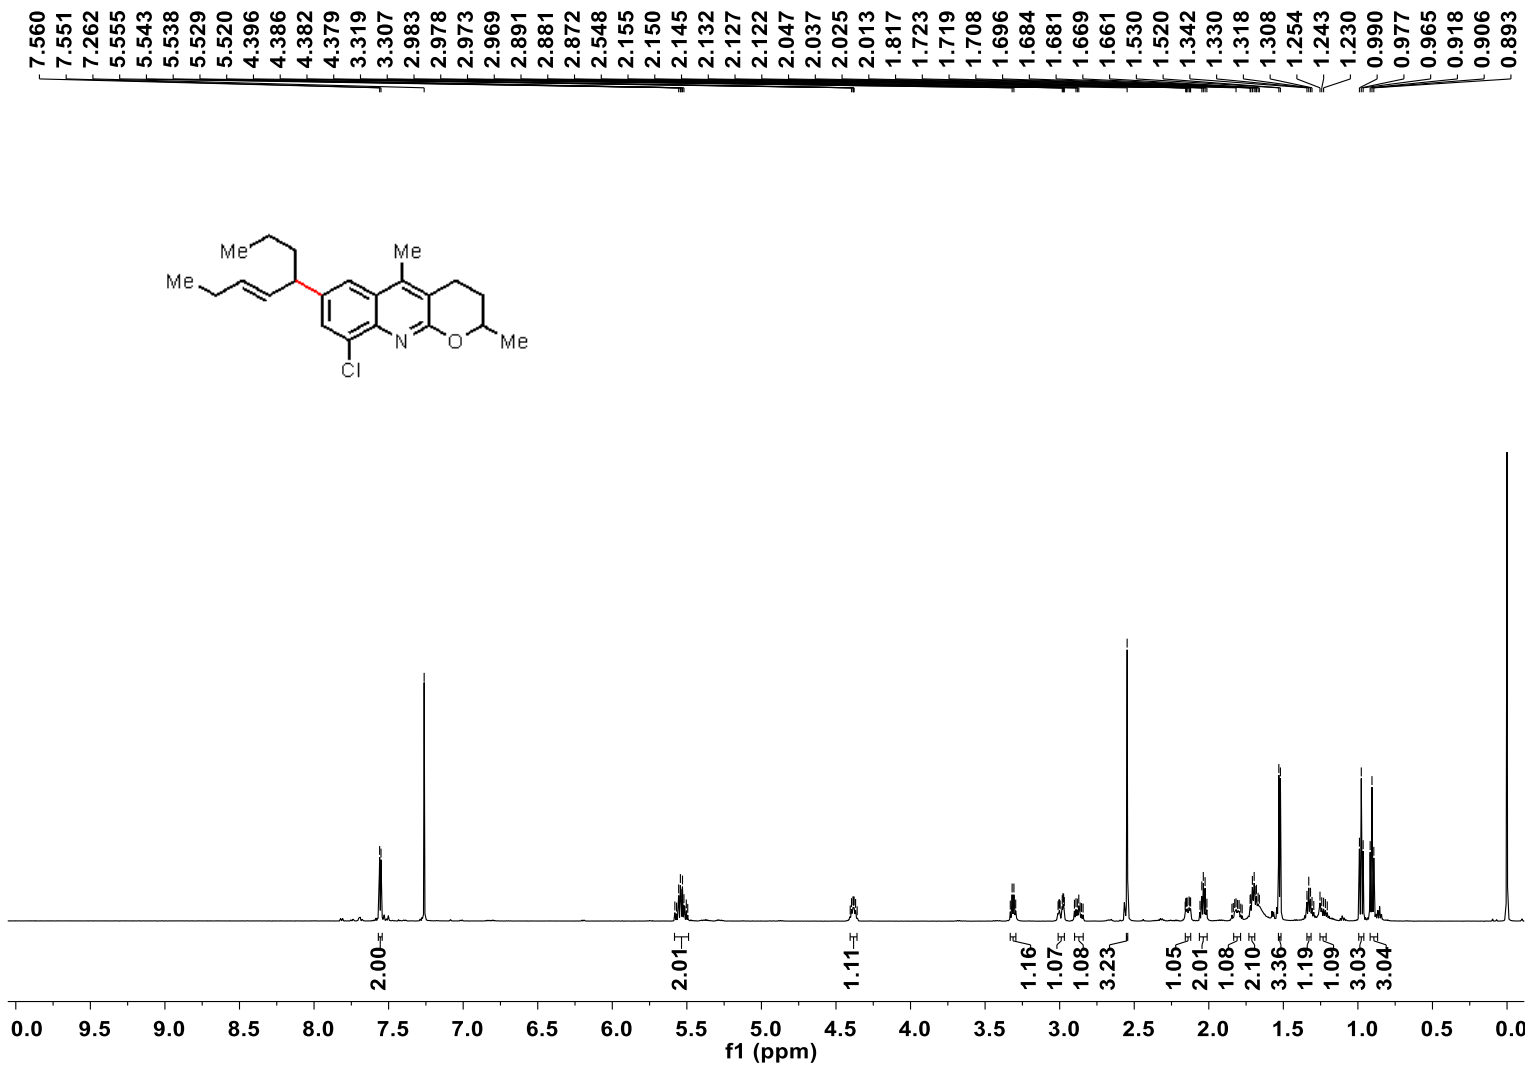

$^{13}\text{C}$  NMR (151 MHz,  $\text{CDCl}_3$ ) spectrum of **5e**

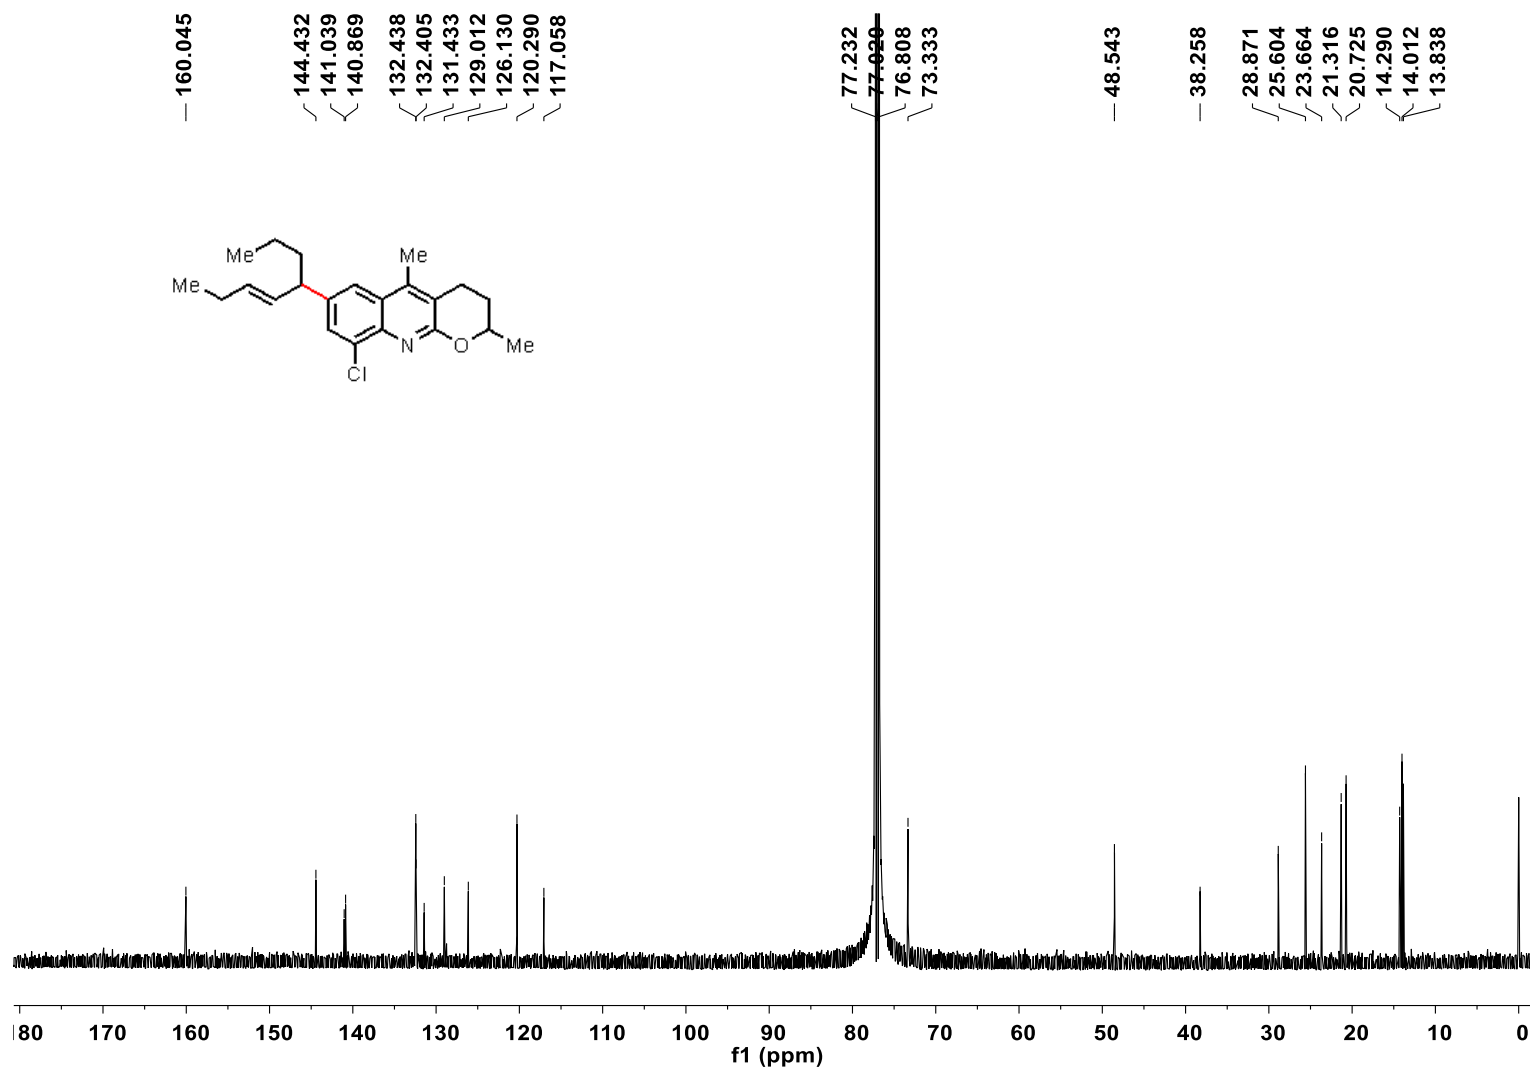

<sup>1</sup>H NMR (600 MHz, CDCl<sub>3</sub>) spectrum of **5f**

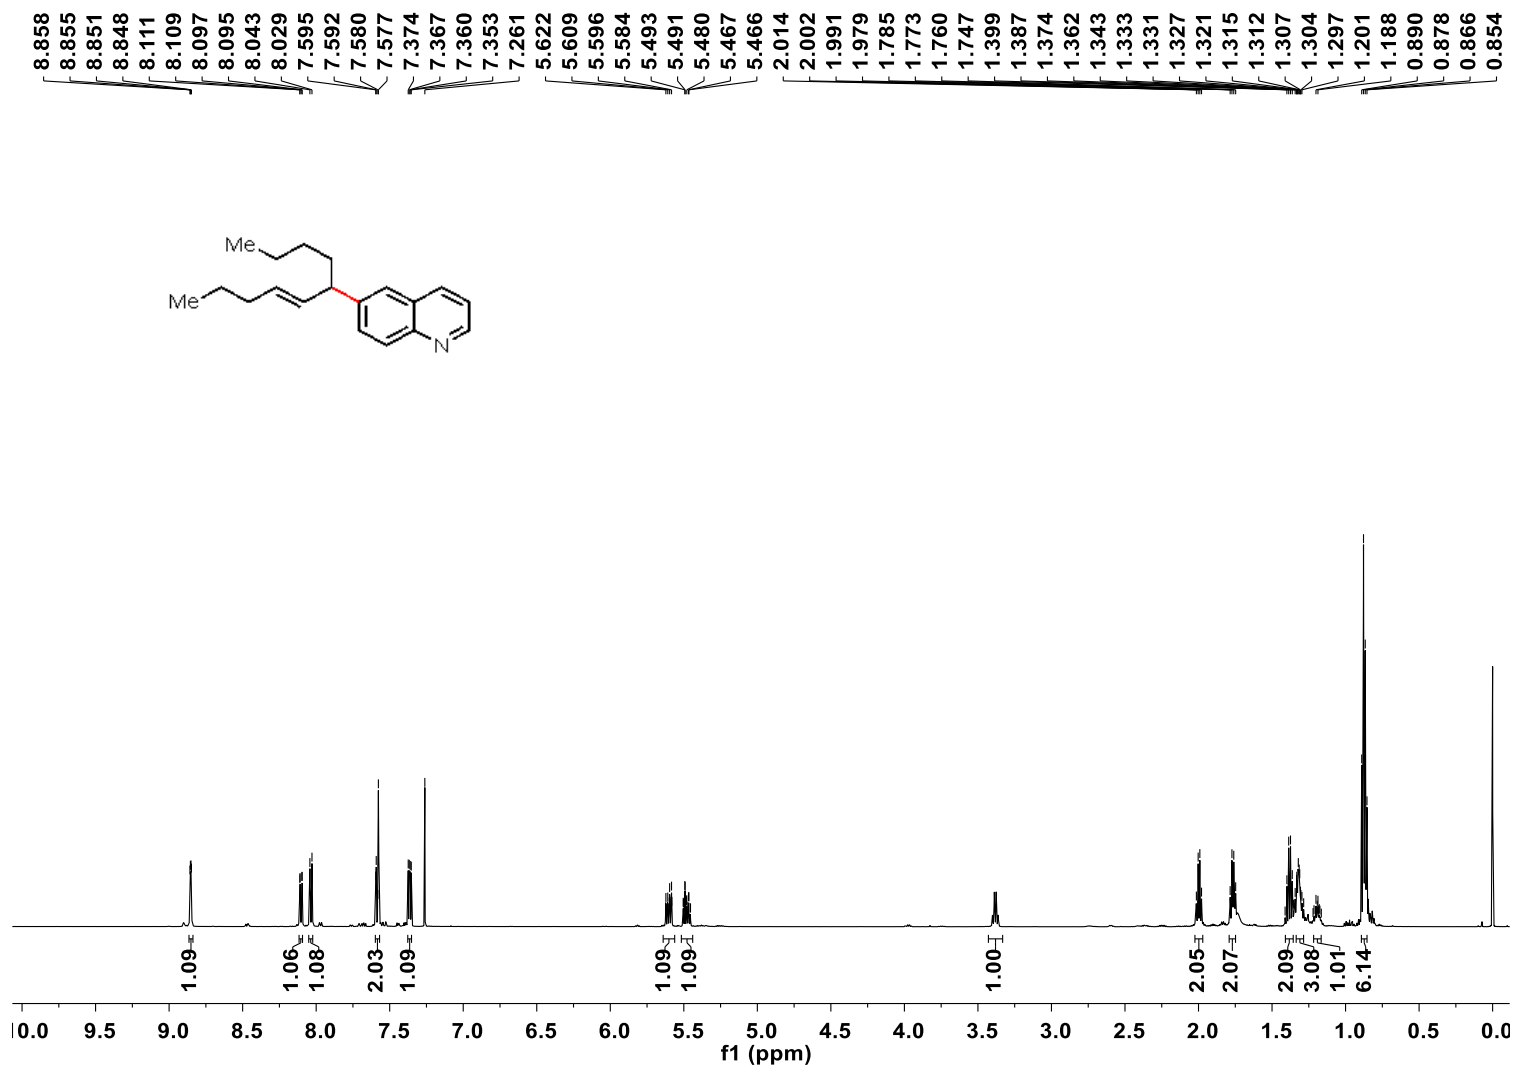

<sup>13</sup>C NMR (151 MHz, CDCl<sub>3</sub>) spectrum of **5f**

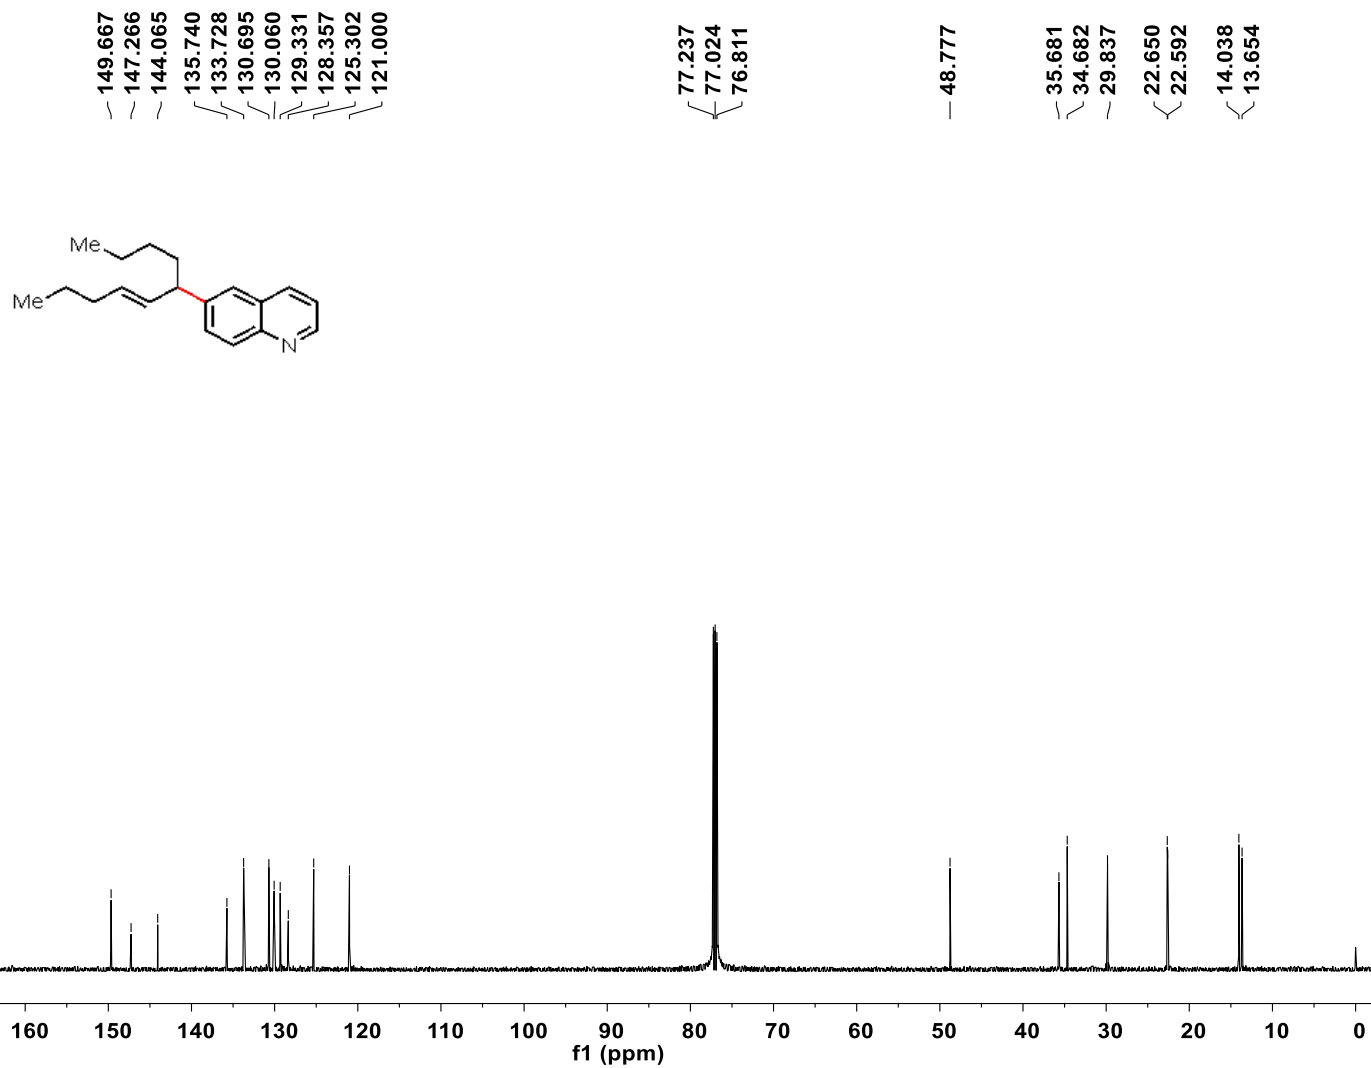



<sup>1</sup>H NMR (600 MHz, CDCl<sub>3</sub>) spectrum of **5g**

8.780  
8.778  
8.773  
8.771  
8.038  
8.025  
7.964  
7.950  
7.563  
7.560  
7.551  
7.548  
7.545  
7.541  
7.540  
7.538  
7.536  
7.533  
7.300  
7.293  
7.286  
7.279  
7.189  
5.280  
5.278  
5.275  
5.273  
5.271  
5.265  
5.262  
5.260  
5.258  
5.255  
3.802  
3.791  
3.787  
3.779  
3.775  
3.768  
3.764  
3.752  
1.668  
1.665  
1.643  
1.640  
1.335  
1.324

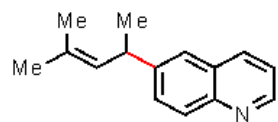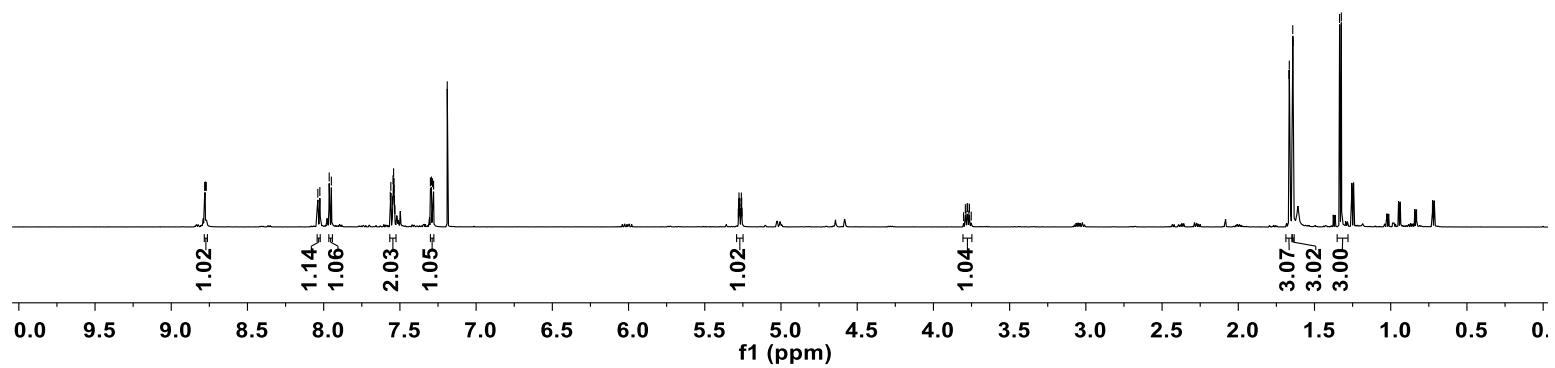

<sup>13</sup>C NMR (151 MHz, CDCl<sub>3</sub>) spectrum of **5g**

- 149.642
- 147.178
- 145.626
- 135.751
- 131.471
- 129.911
- 129.513
- 129.357
- 128.360
- 124.227
- 121.014
- 77.238
- 77.026
- 76.814
- 38.120
- 25.840
- 22.356
- 18.076

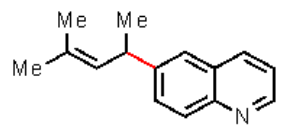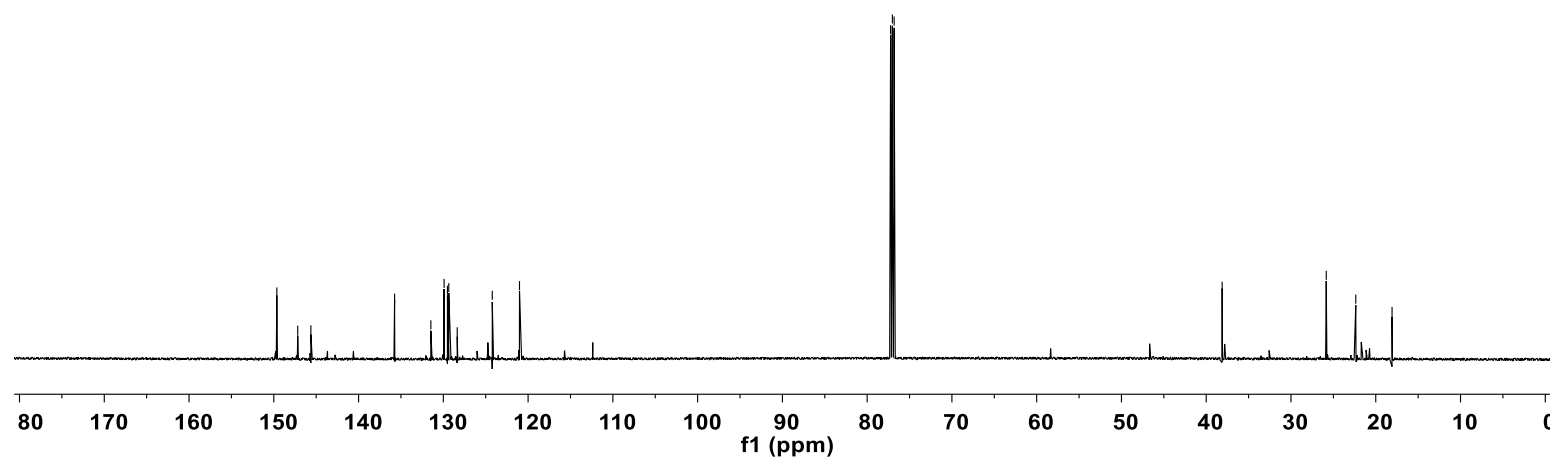

<sup>1</sup>H NMR (600 MHz, CDCl<sub>3</sub>) spectrum of **5h**

8.887  
8.884  
8.880  
8.877  
8.126  
8.124  
8.123  
8.112  
8.110  
8.109  
8.058  
8.043  
7.612  
7.610  
7.608  
7.607  
7.605  
7.601  
7.590  
7.587  
7.400  
7.393  
7.386  
7.379  
7.284  
5.675  
5.660  
5.658  
5.651  
5.649  
5.648  
5.639  
5.638  
5.623  
5.614  
5.613  
5.611  
5.602  
5.587  
3.547  
3.536  
2.082  
2.080  
2.069  
2.057  
2.046  
2.045  
1.474  
1.462  
1.450  
1.437  
1.425  
1.413  
0.950  
0.938  
0.926

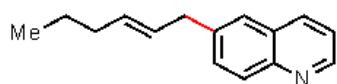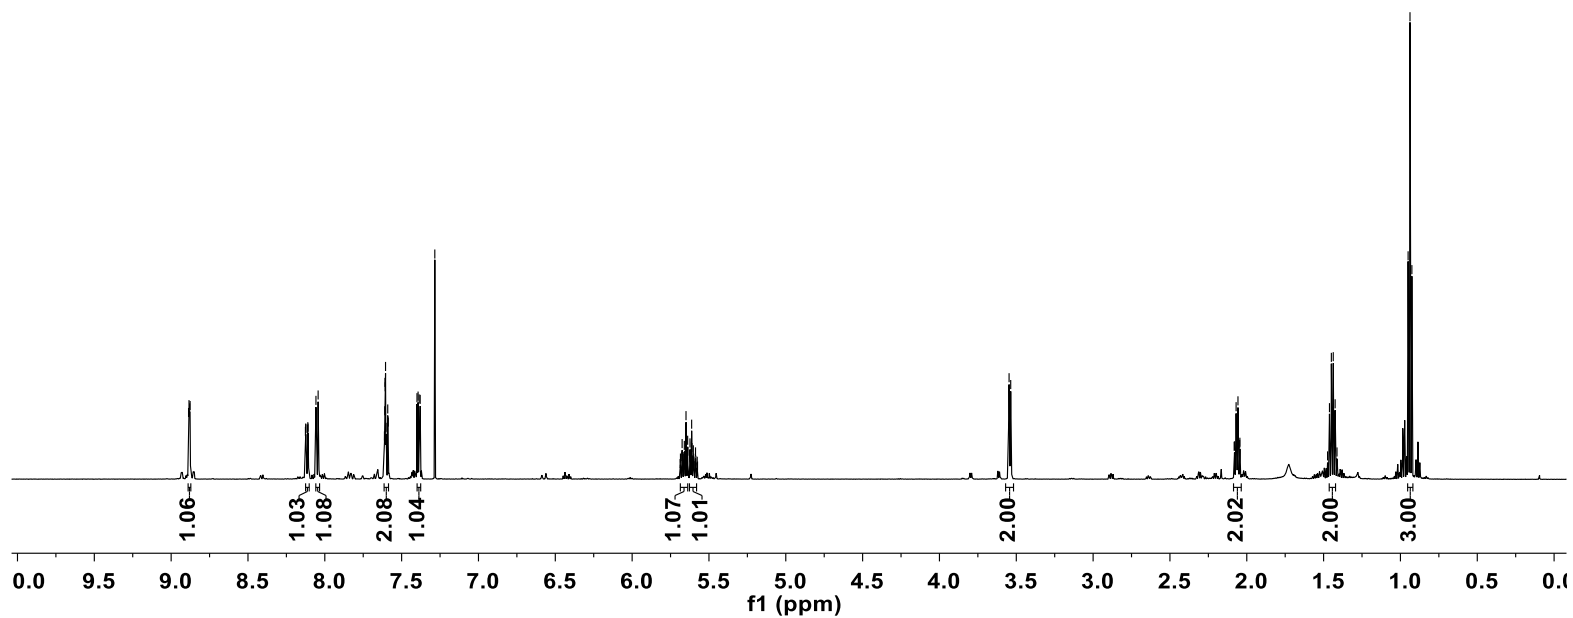

<sup>13</sup>C NMR (151 MHz, CDCl<sub>3</sub>) spectrum of **5h**

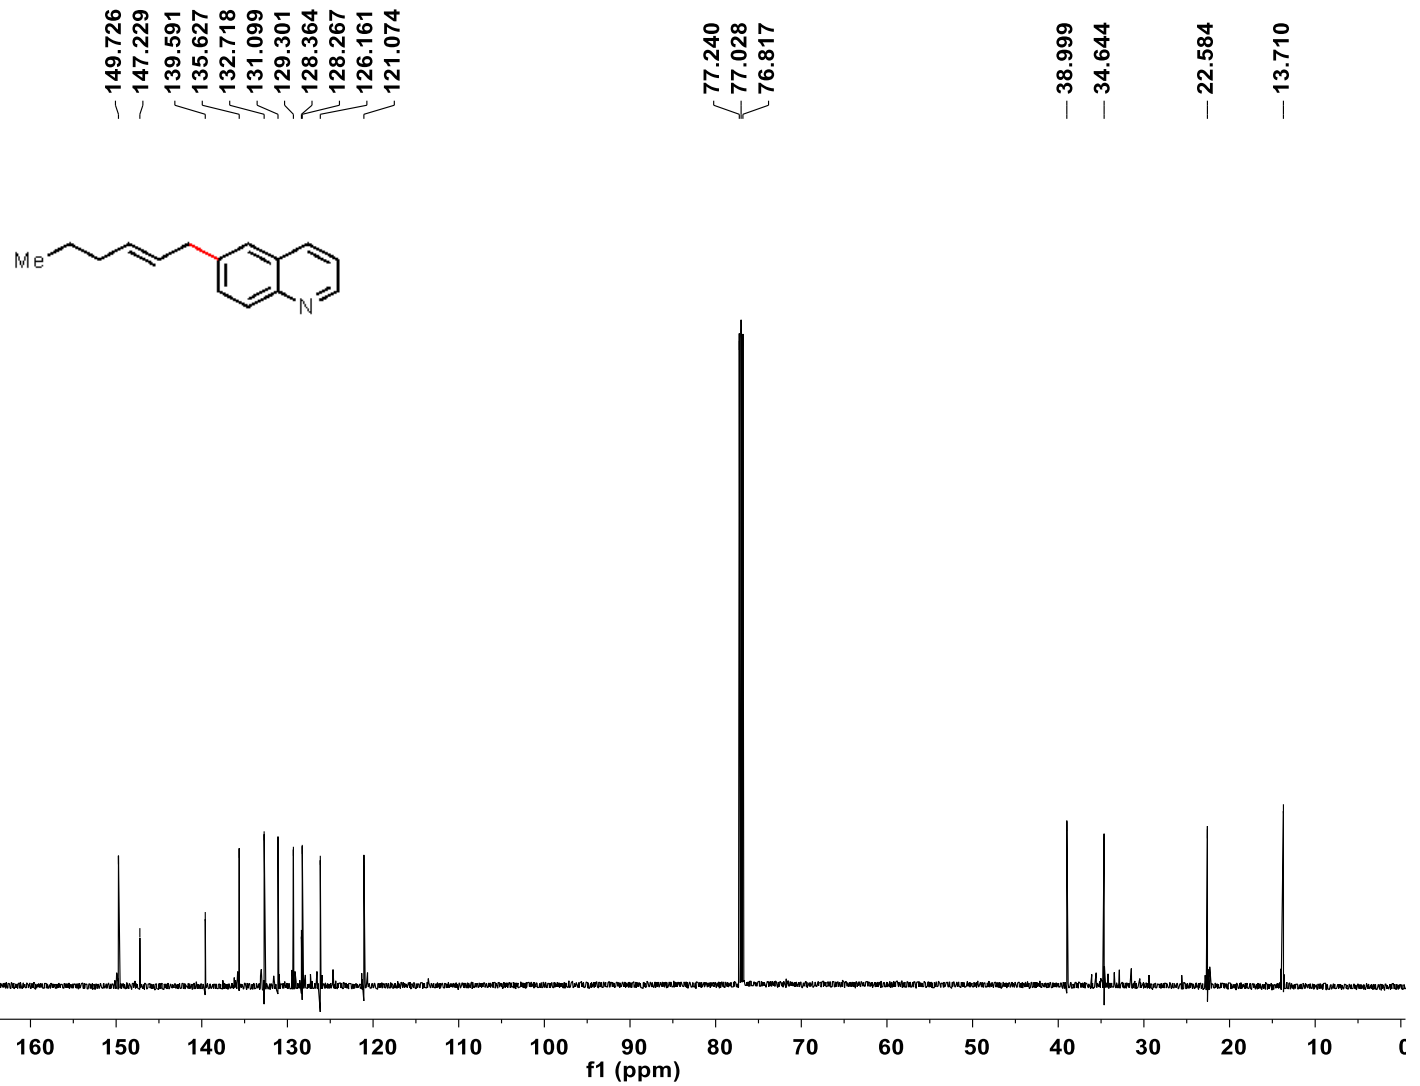

<sup>1</sup>H NMR (600 MHz, CDCl<sub>3</sub>) spectrum of **6a**

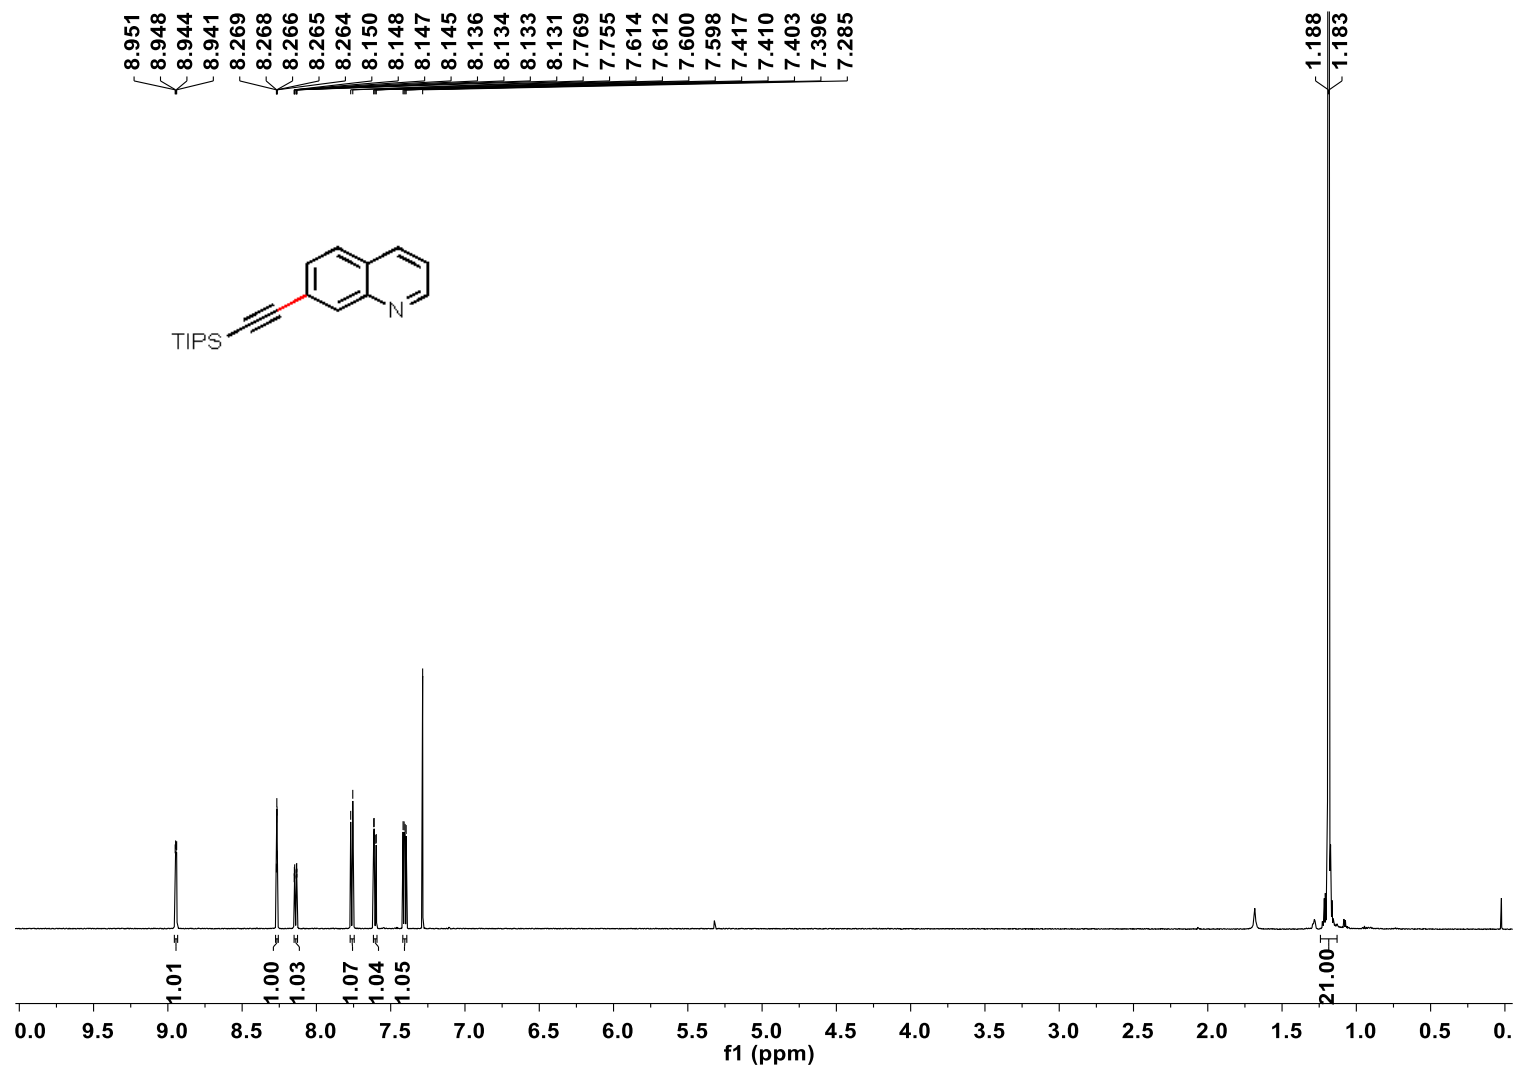

<sup>13</sup>C NMR (151 MHz, CDCl<sub>3</sub>) spectrum of **6a**

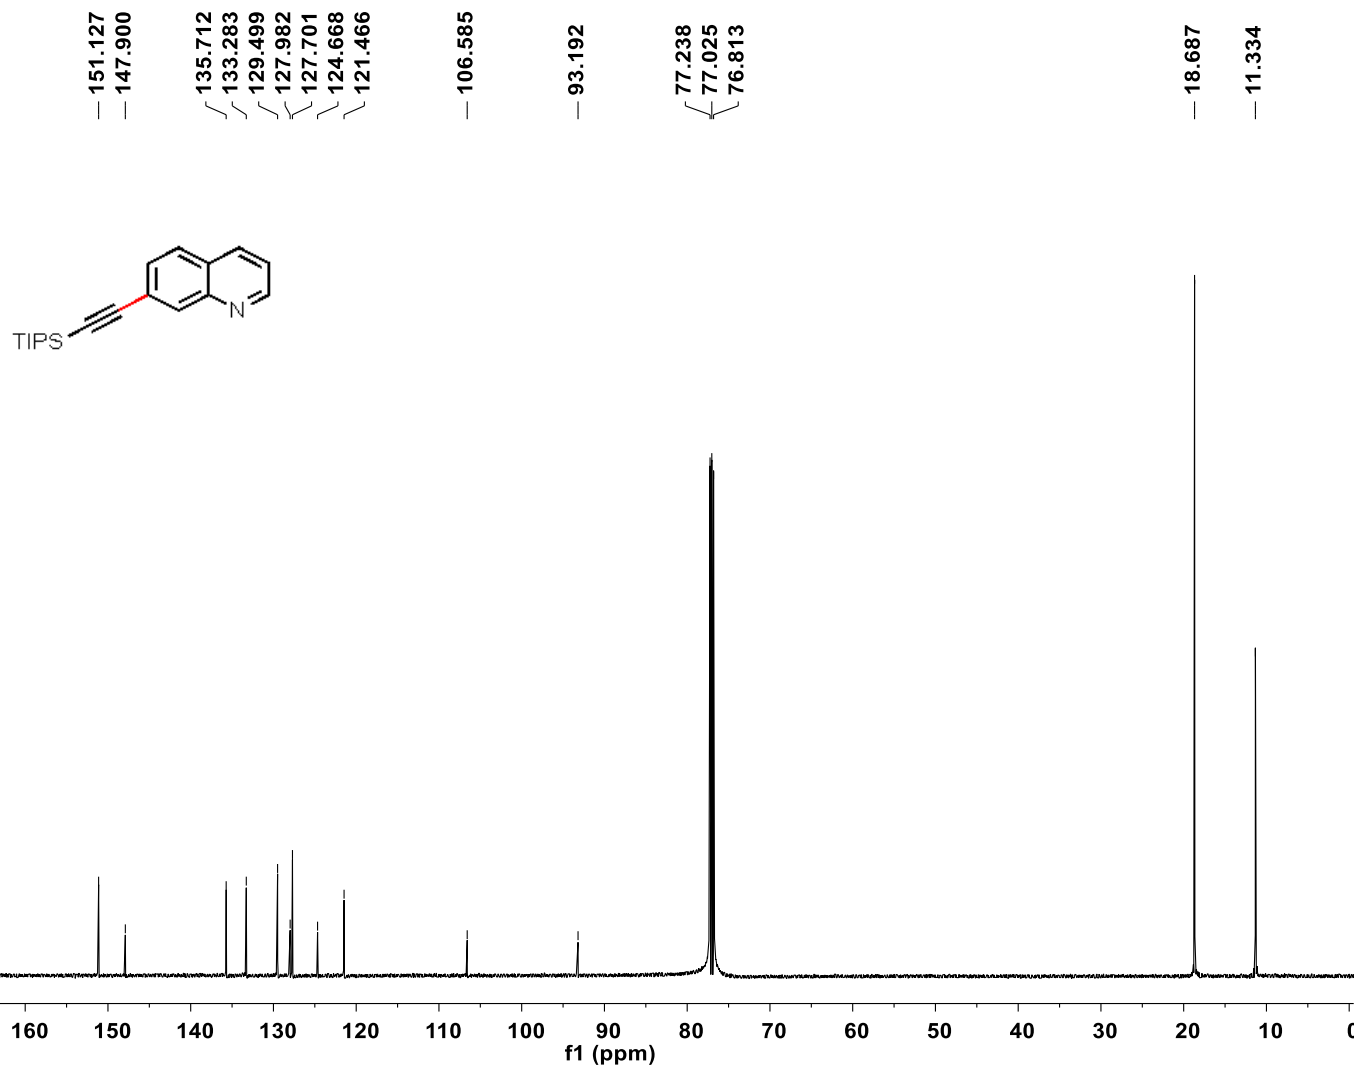

$^1\text{H}$  NMR (600 MHz,  $\text{CDCl}_3$ ) spectrum of **6b**

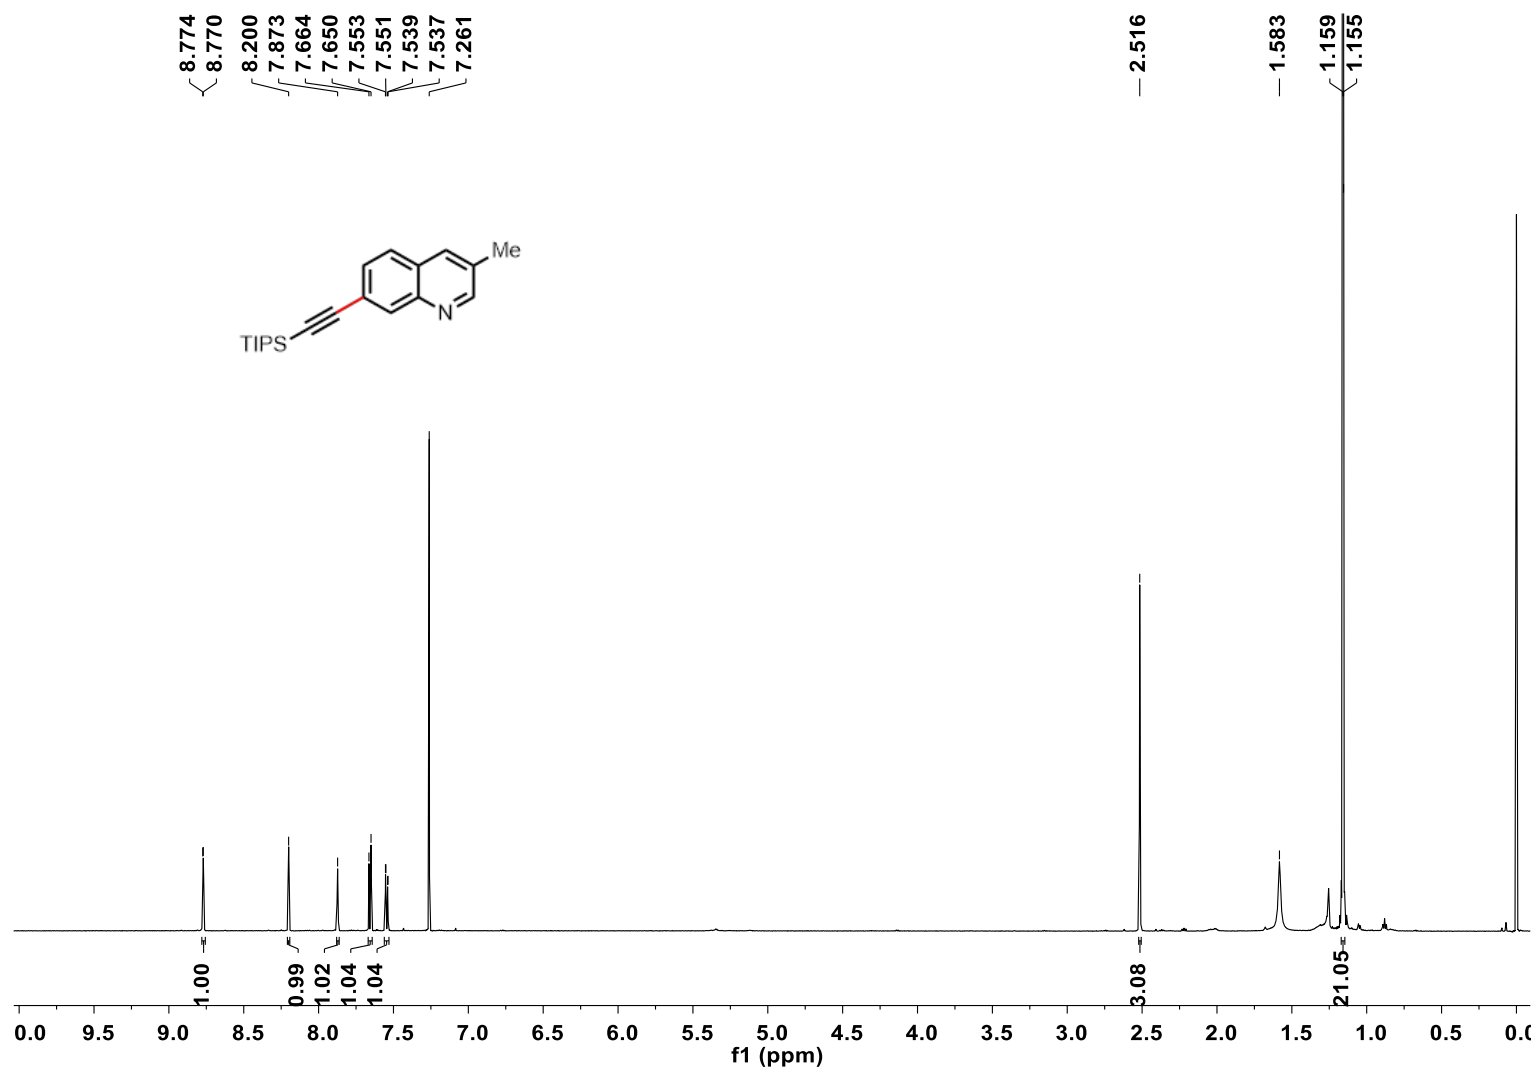

<sup>13</sup>C NMR (151 MHz, CDCl<sub>3</sub>) spectrum of **6b**

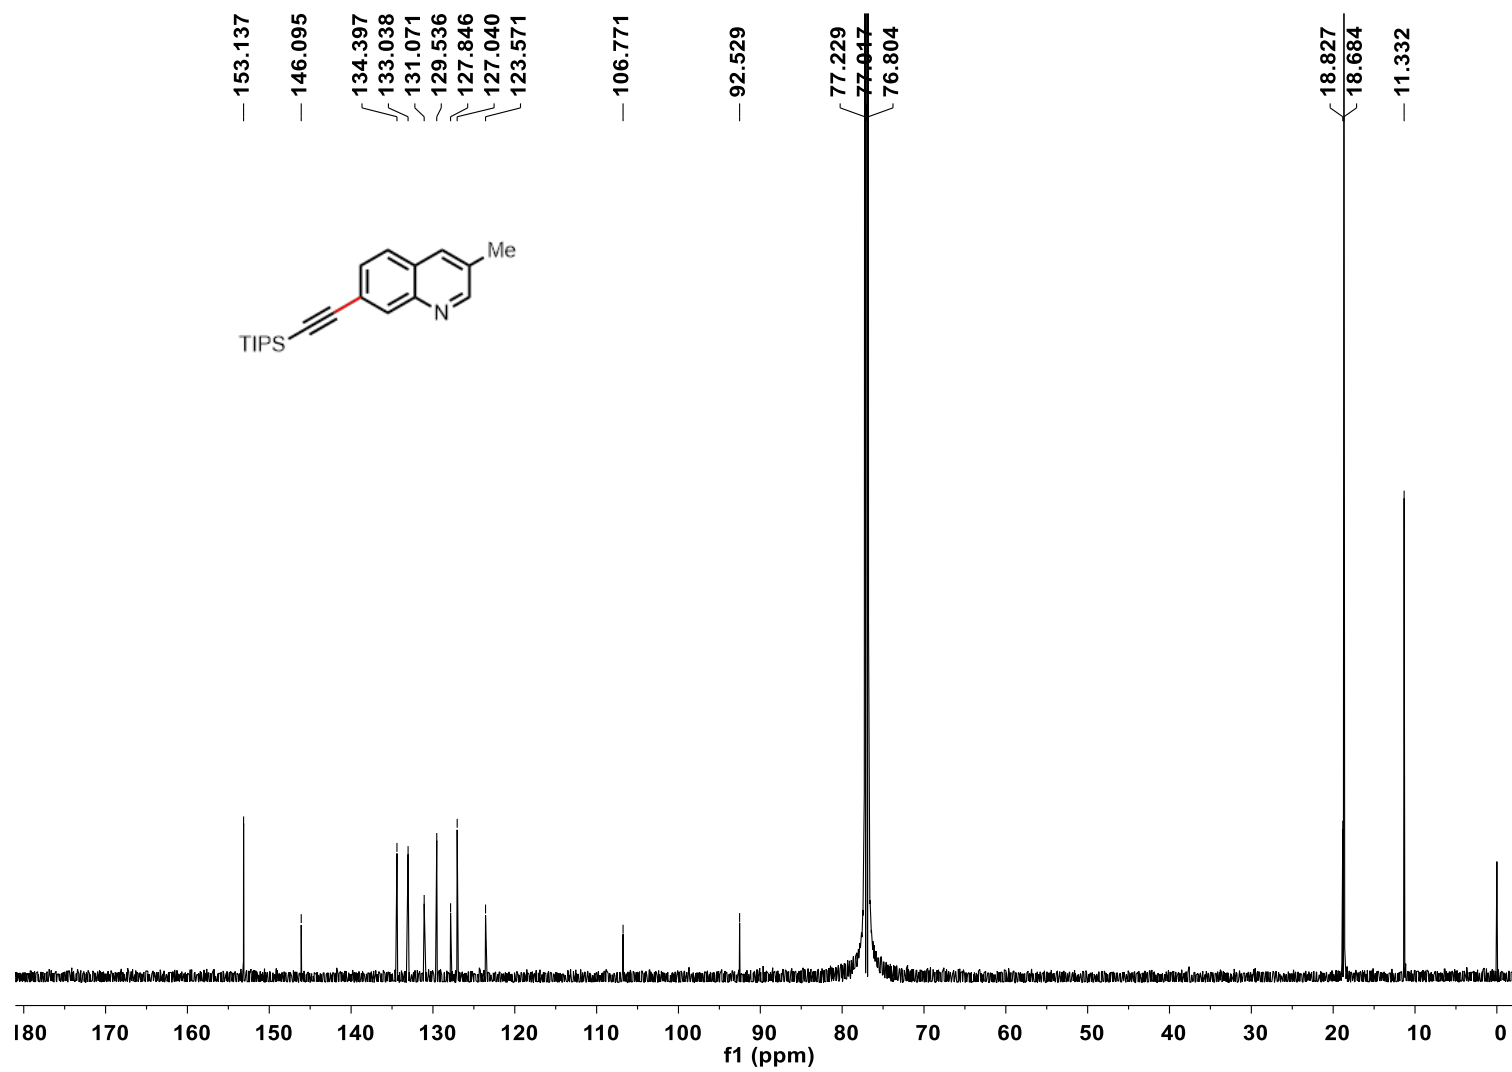



<sup>1</sup>H NMR (600 MHz, CDCl<sub>3</sub>) spectrum of **6c**

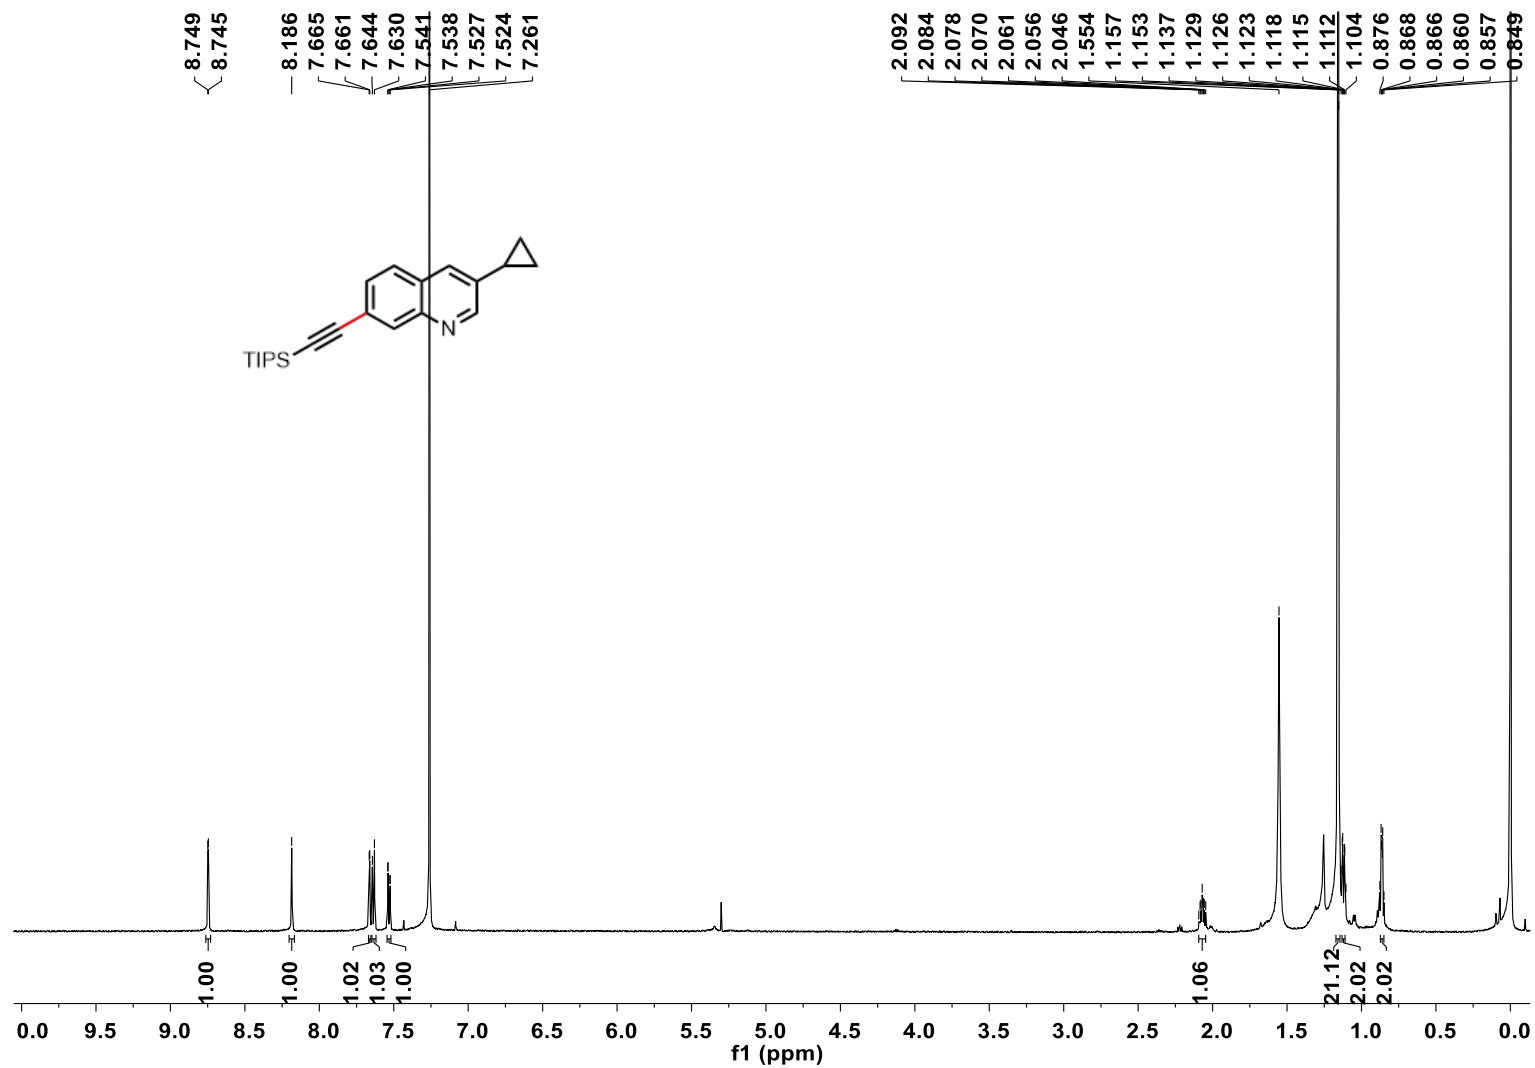

<sup>13</sup>C NMR (151 MHz, CDCl<sub>3</sub>) spectrum of **6c**

- 151.358
- 146.249
- 137.352
- 133.006
- 130.416
- 129.588
- 127.827
- 127.043
- 123.372
- 106.815
- 92.501
- 77.227
- 77.046
- 76.805
- 18.687
- 13.467
- 11.340
- 9.384

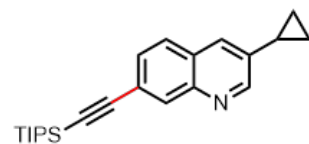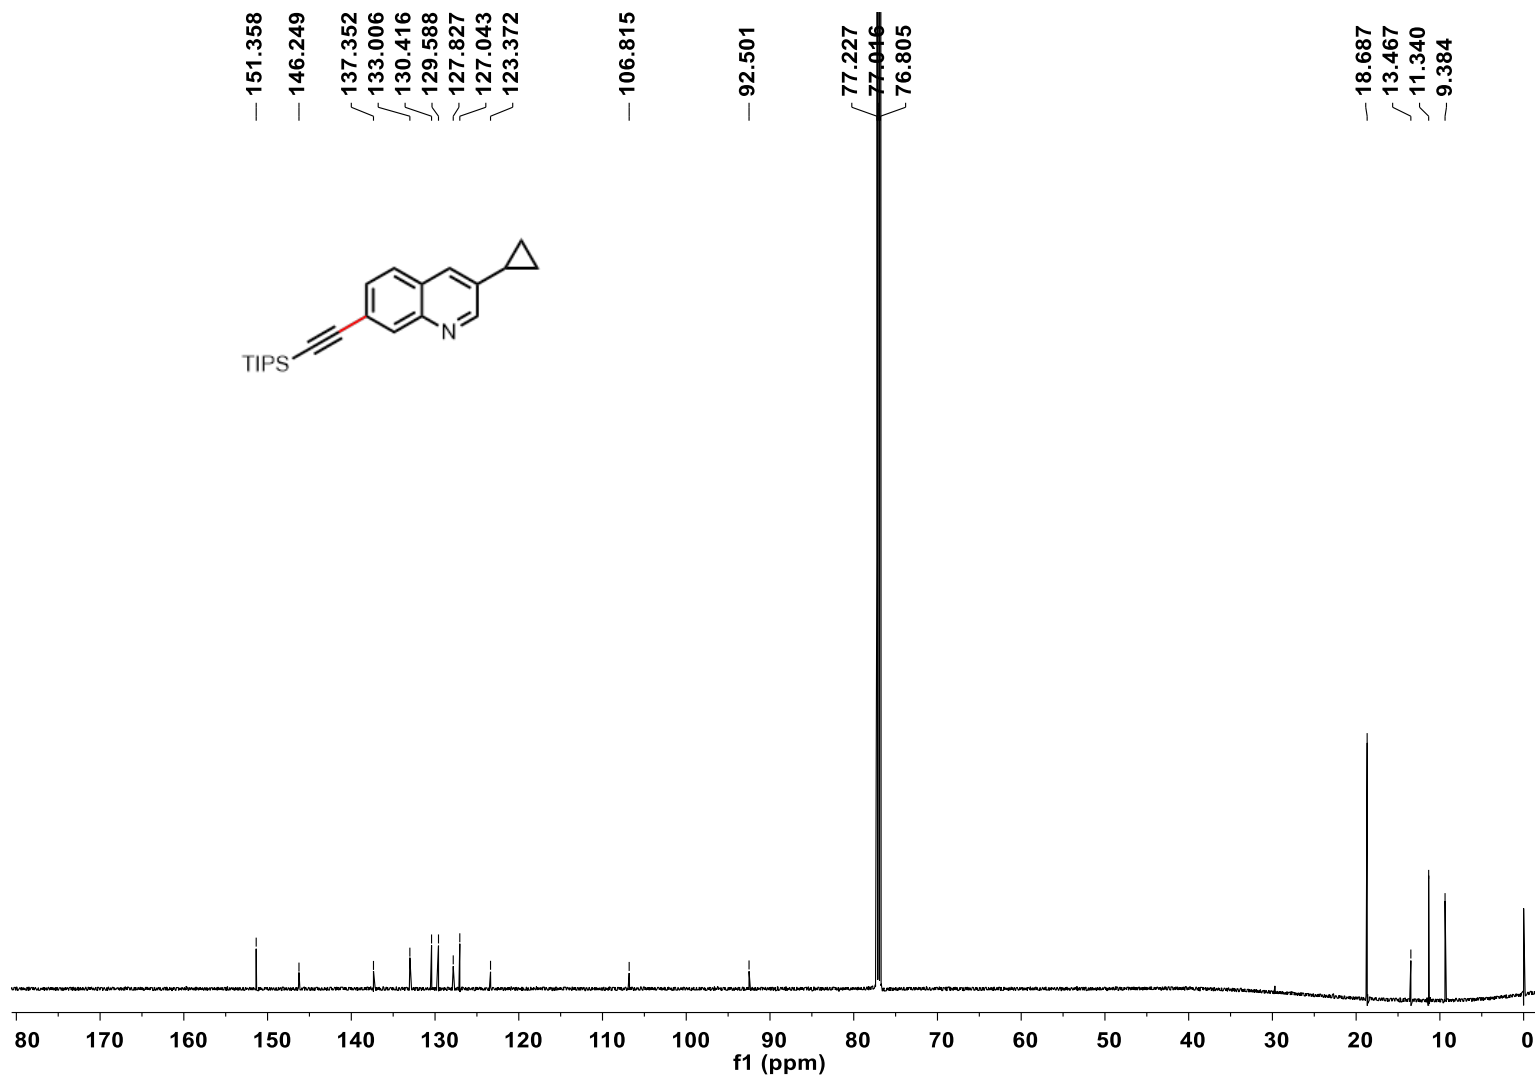

$^1\text{H}$  NMR (600 MHz,  $\text{CDCl}_3$ ) spectrum of **6d**

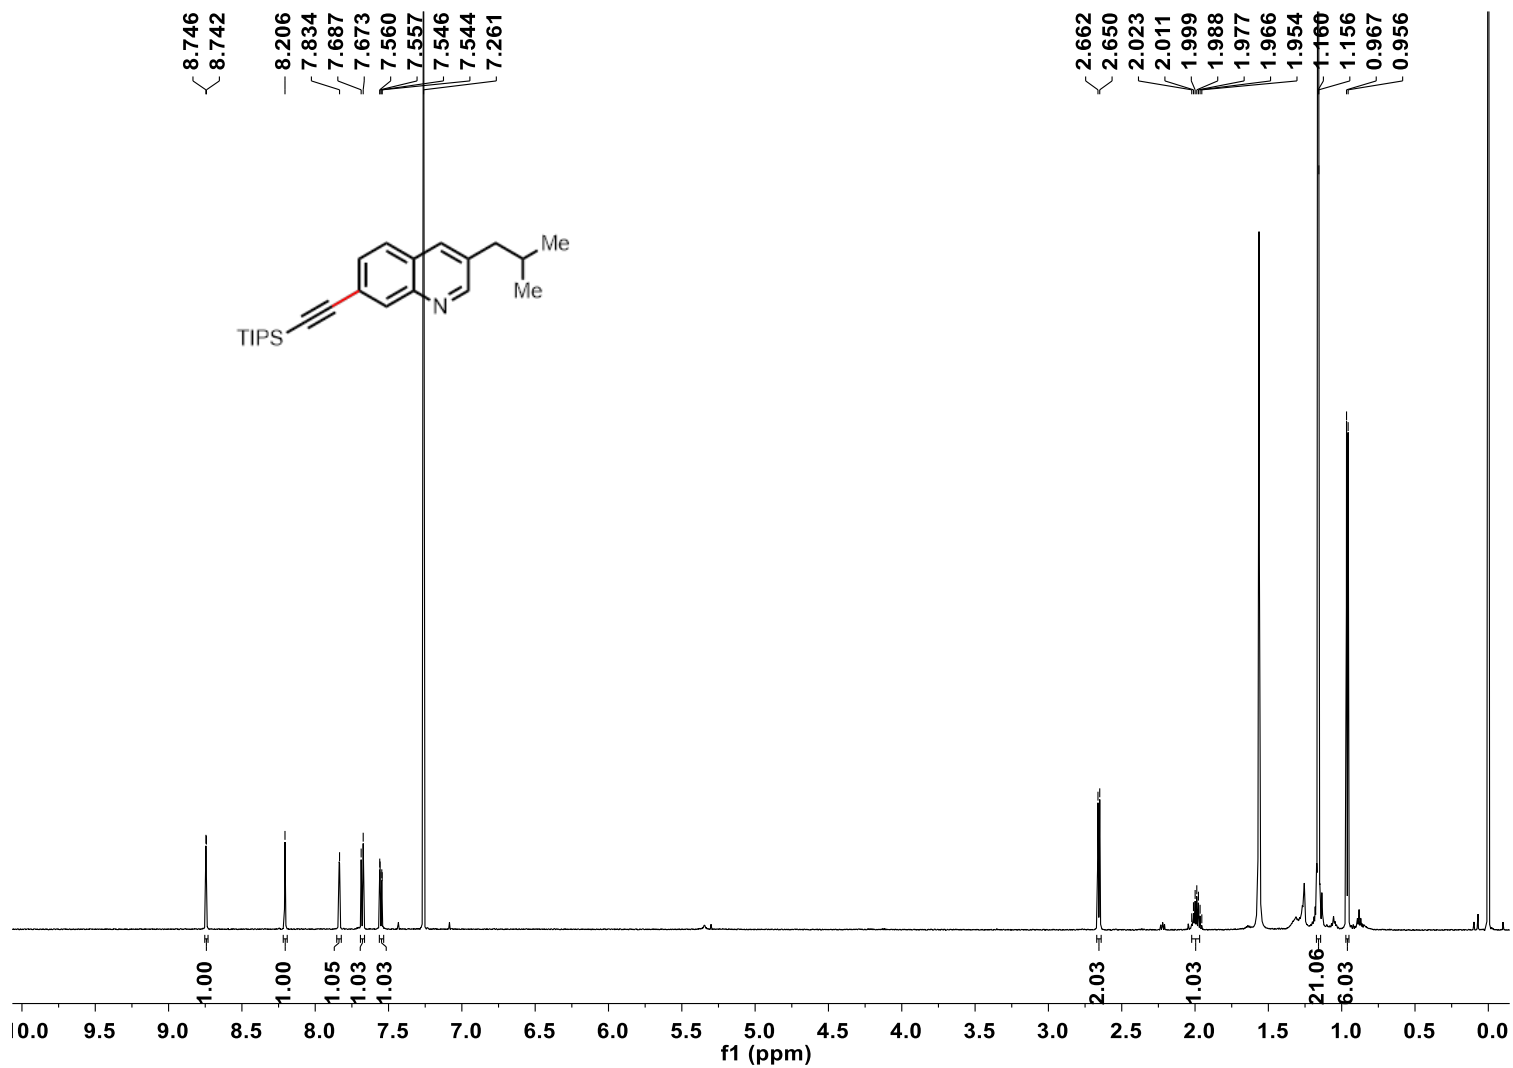

$^{13}\text{C}$  NMR (151 MHz,  $\text{CDCl}_3$ ) spectrum of **6d**

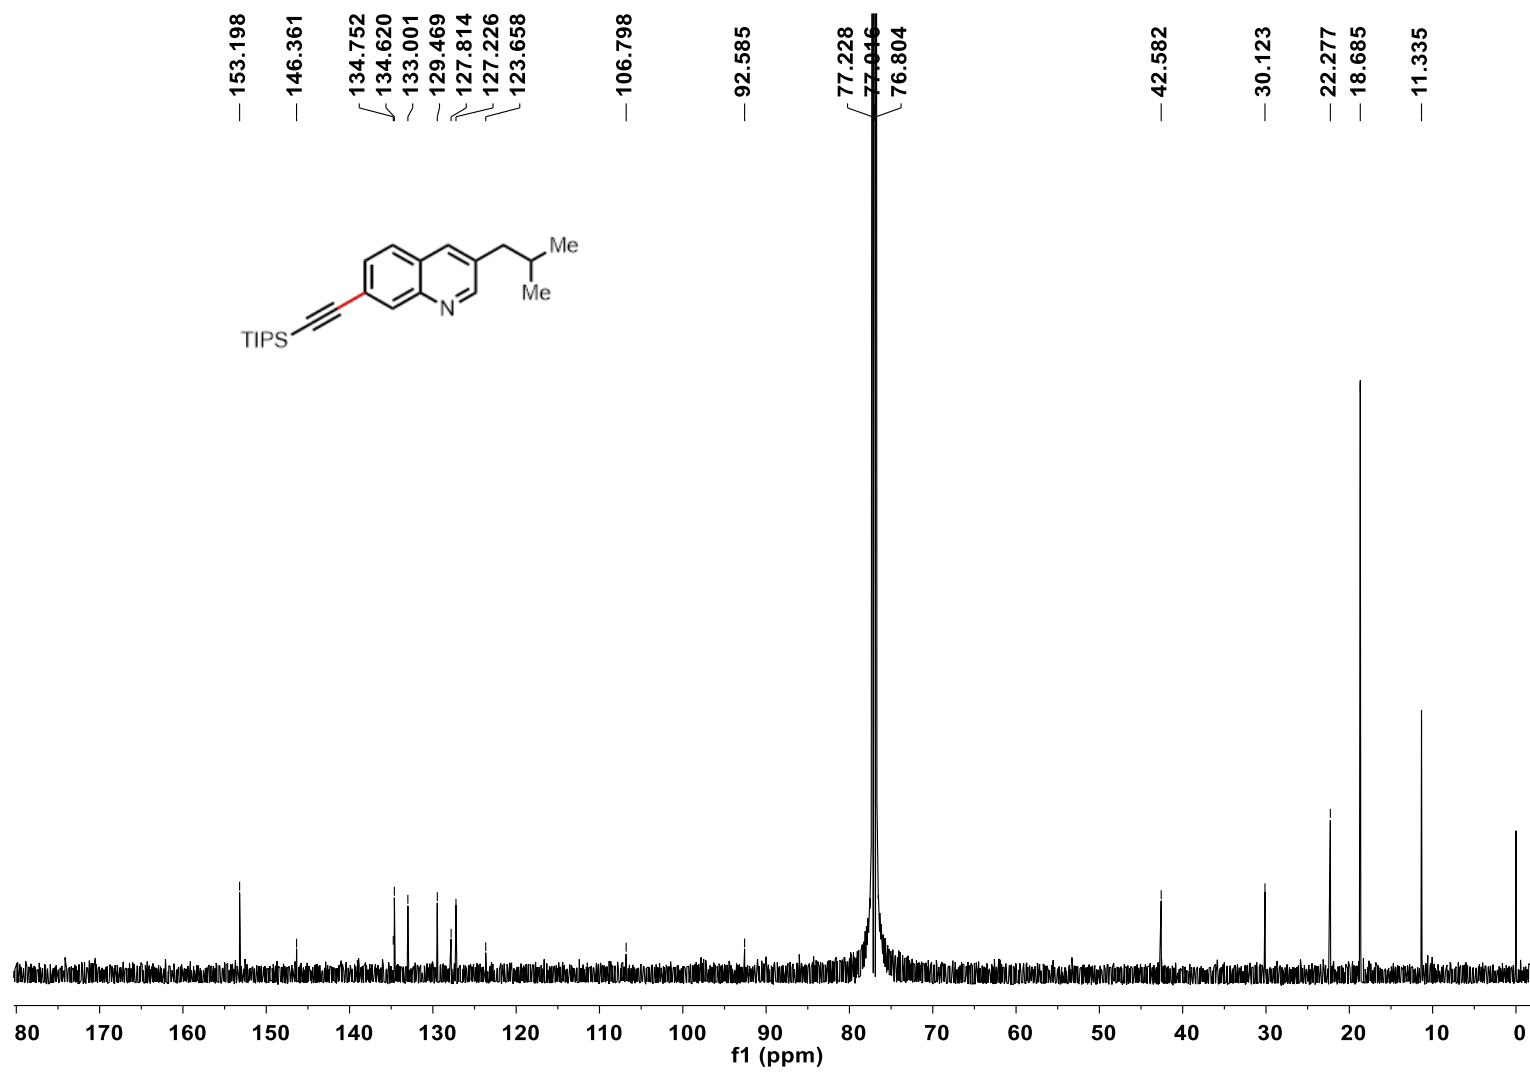

<sup>1</sup>H NMR (600 MHz, CDCl<sub>3</sub>) spectrum of 6e

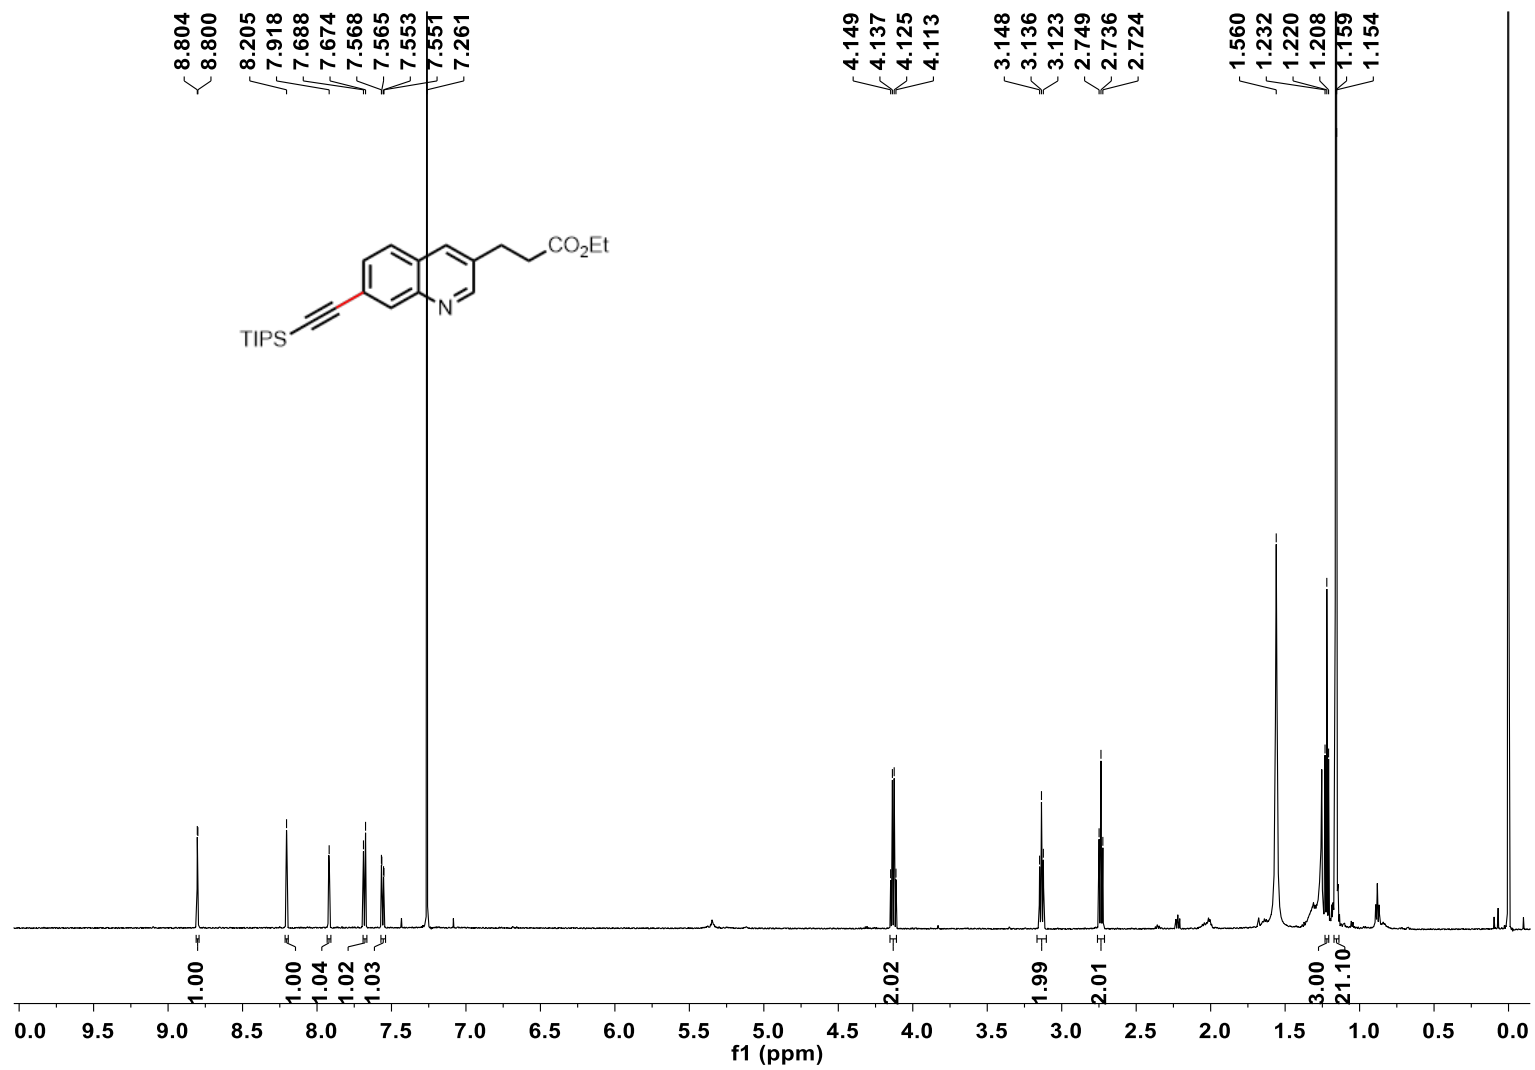

<sup>13</sup>C NMR (151 MHz, CDCl<sub>3</sub>) spectrum of **6e**

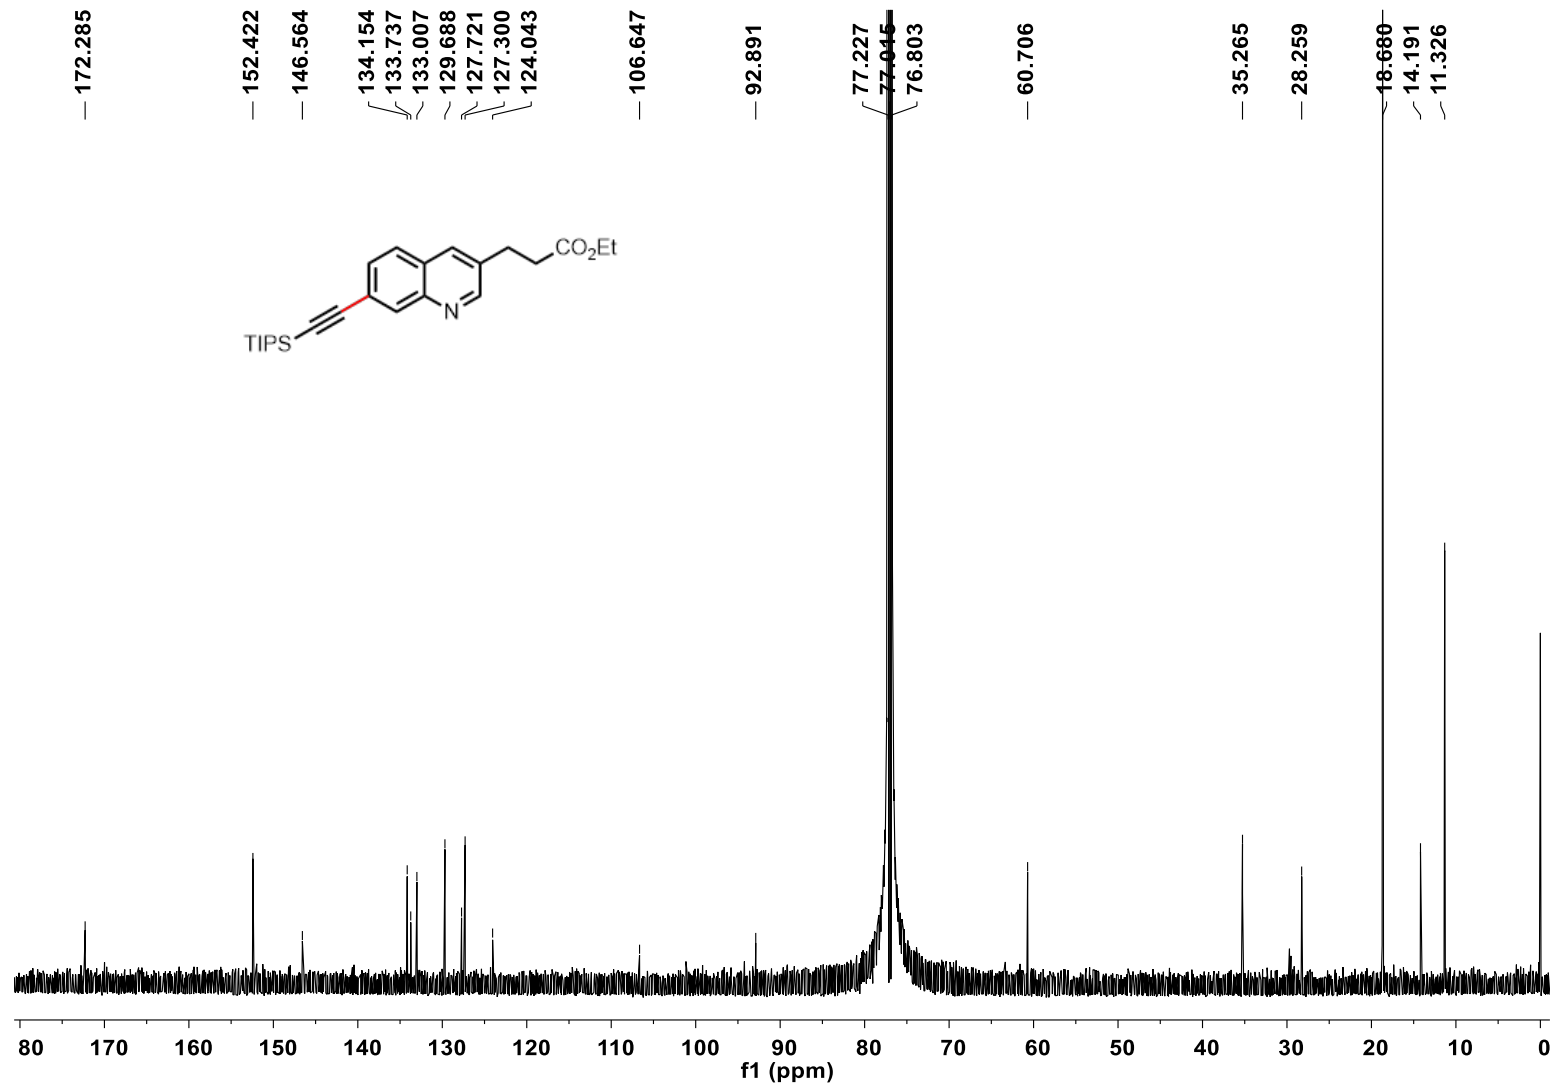

$^1\text{H}$  NMR (600 MHz,  $\text{CDCl}_3$ ) spectrum of **6f**

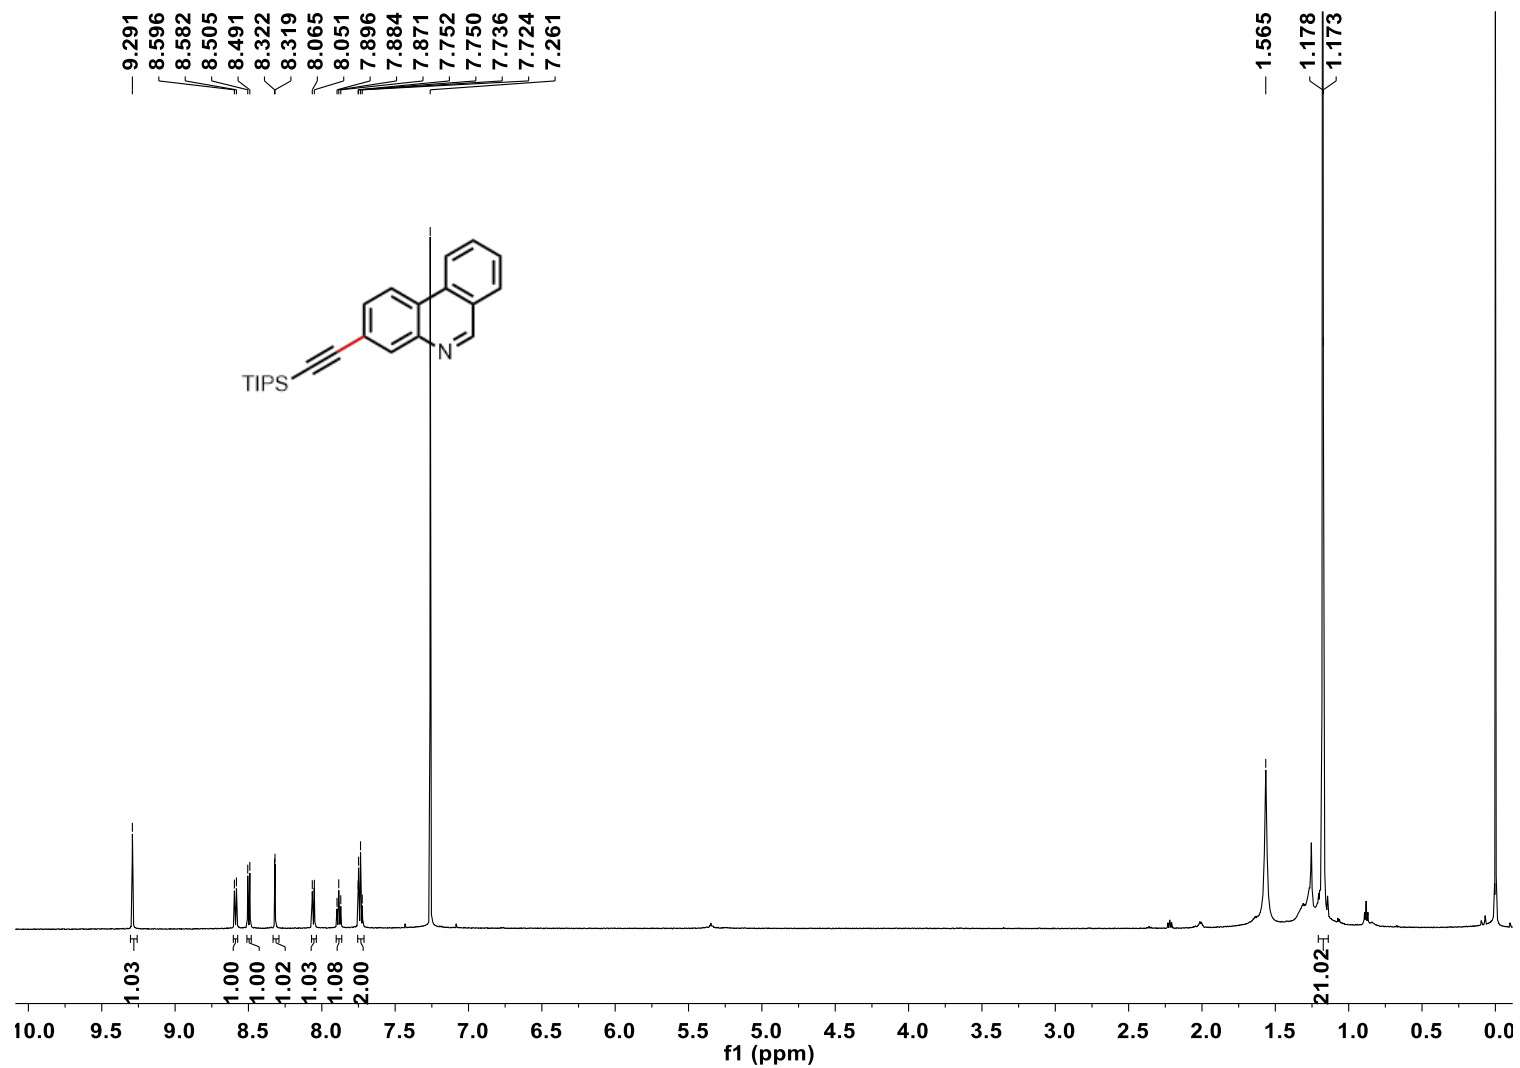

$^{13}\text{C}$  NMR (151 MHz,  $\text{CDCl}_3$ ) spectrum of **6f**

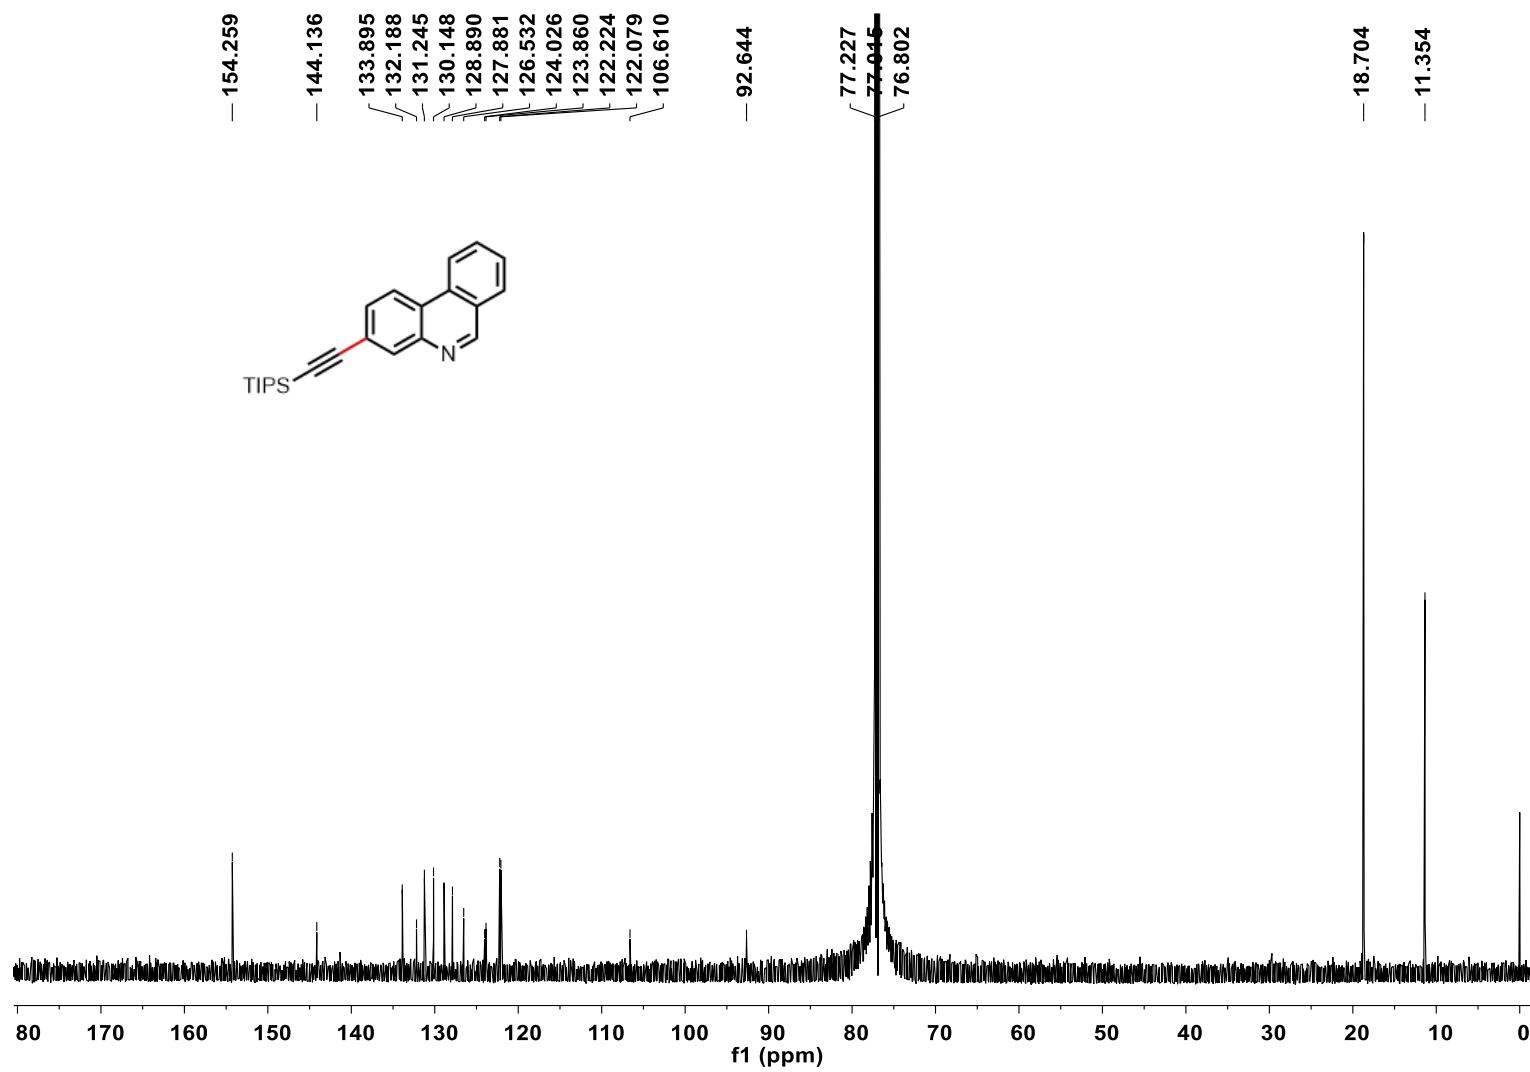



$^1\text{H}$  NMR (600 MHz,  $\text{CDCl}_3$ ) spectrum of **8**

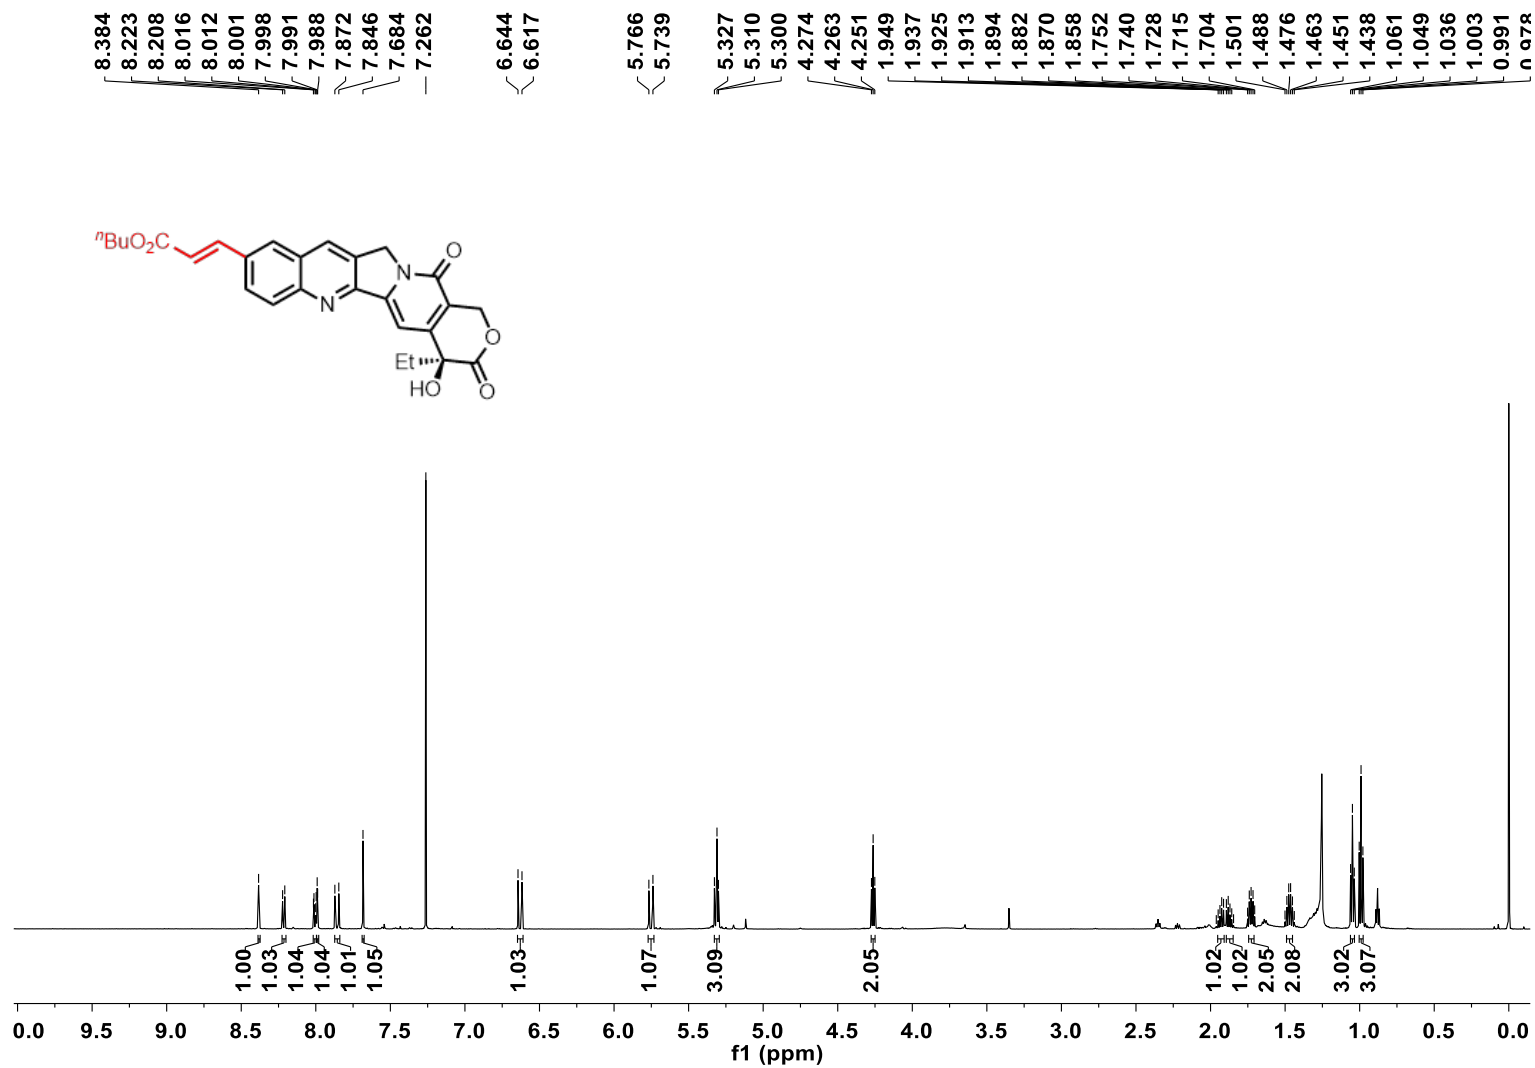

$^{13}\text{C}$  NMR (151 MHz,  $\text{CDCl}_3$ ) spectrum of **8**

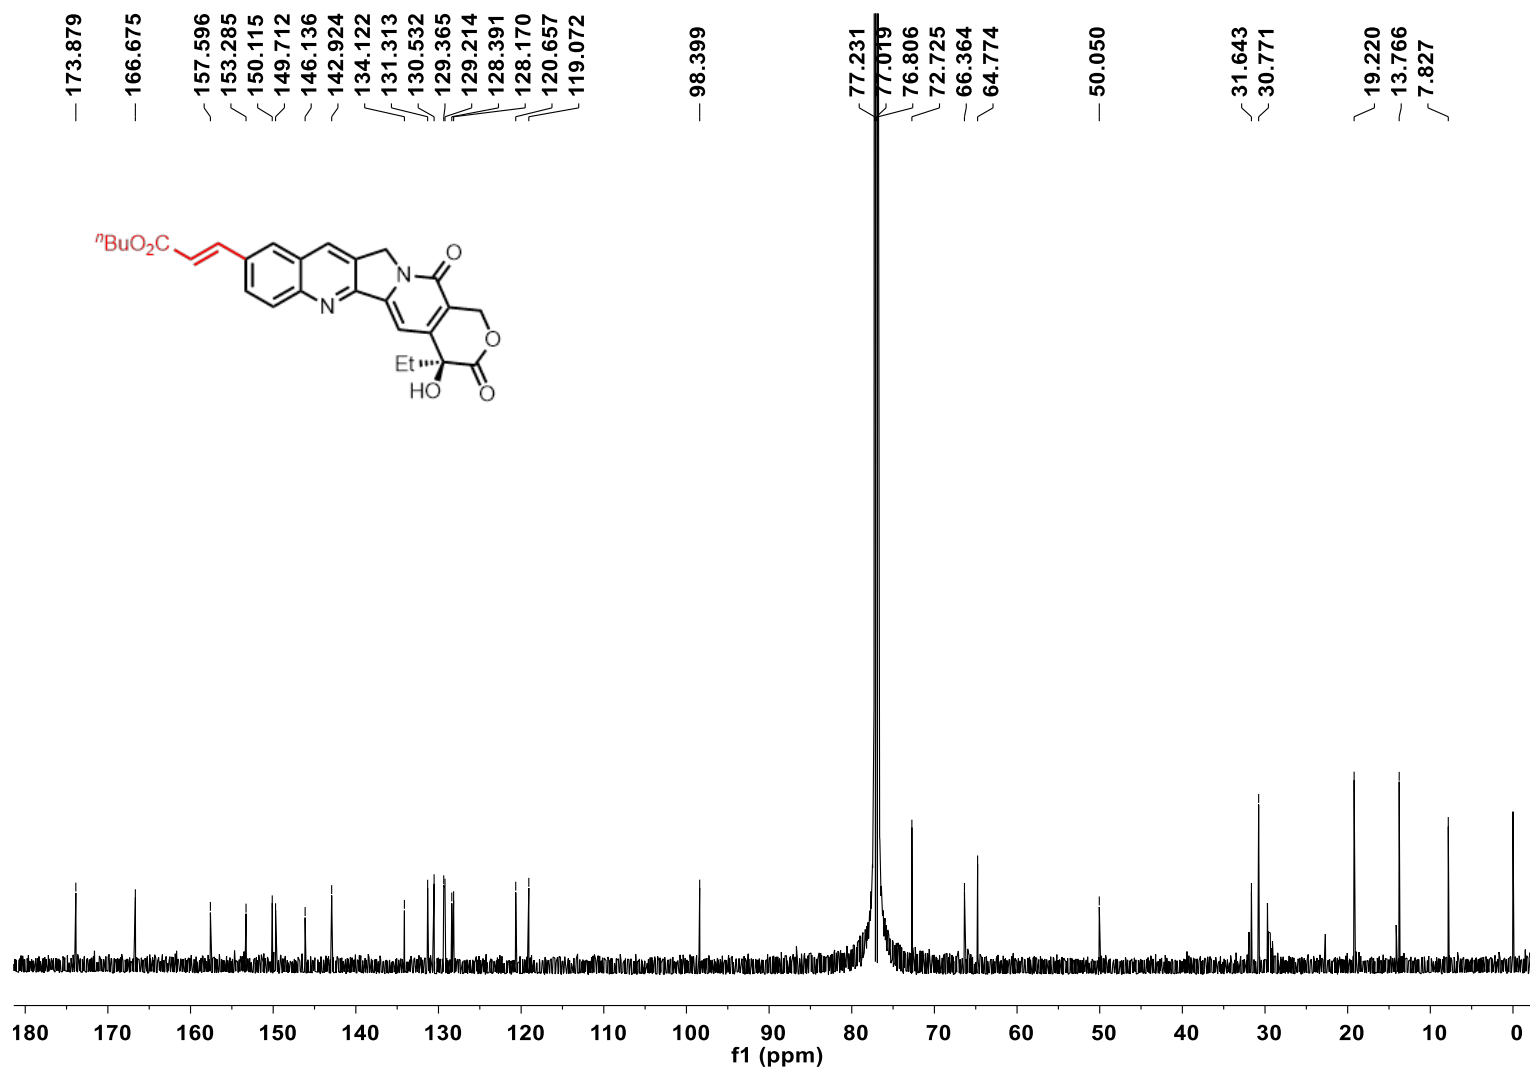

# NOESY spectrum of **8**

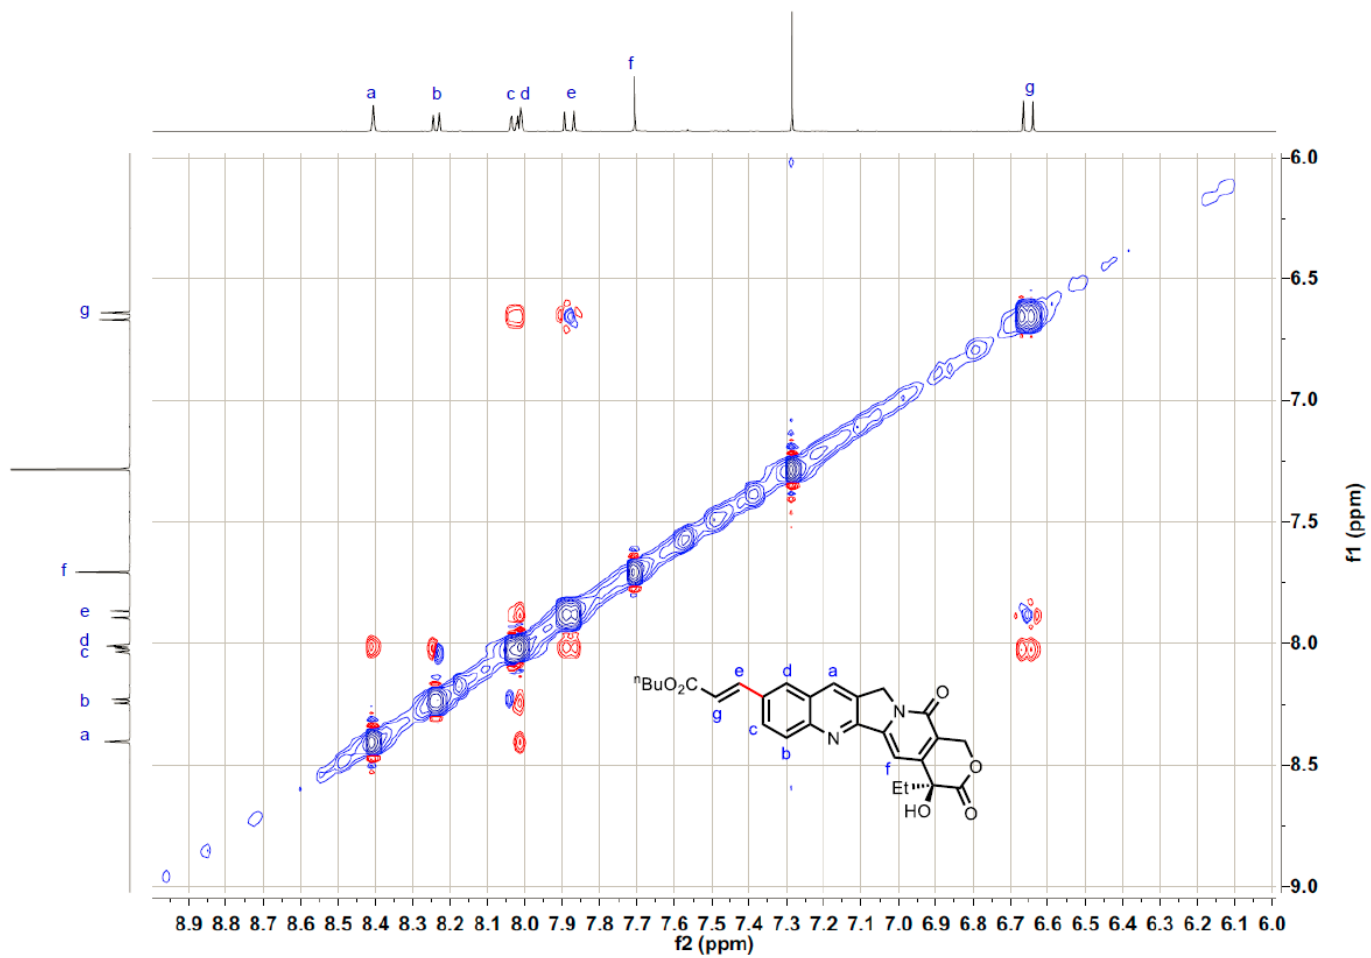

<sup>1</sup>H NMR (600 MHz, CDCl<sub>3</sub>) spectrum of **9**

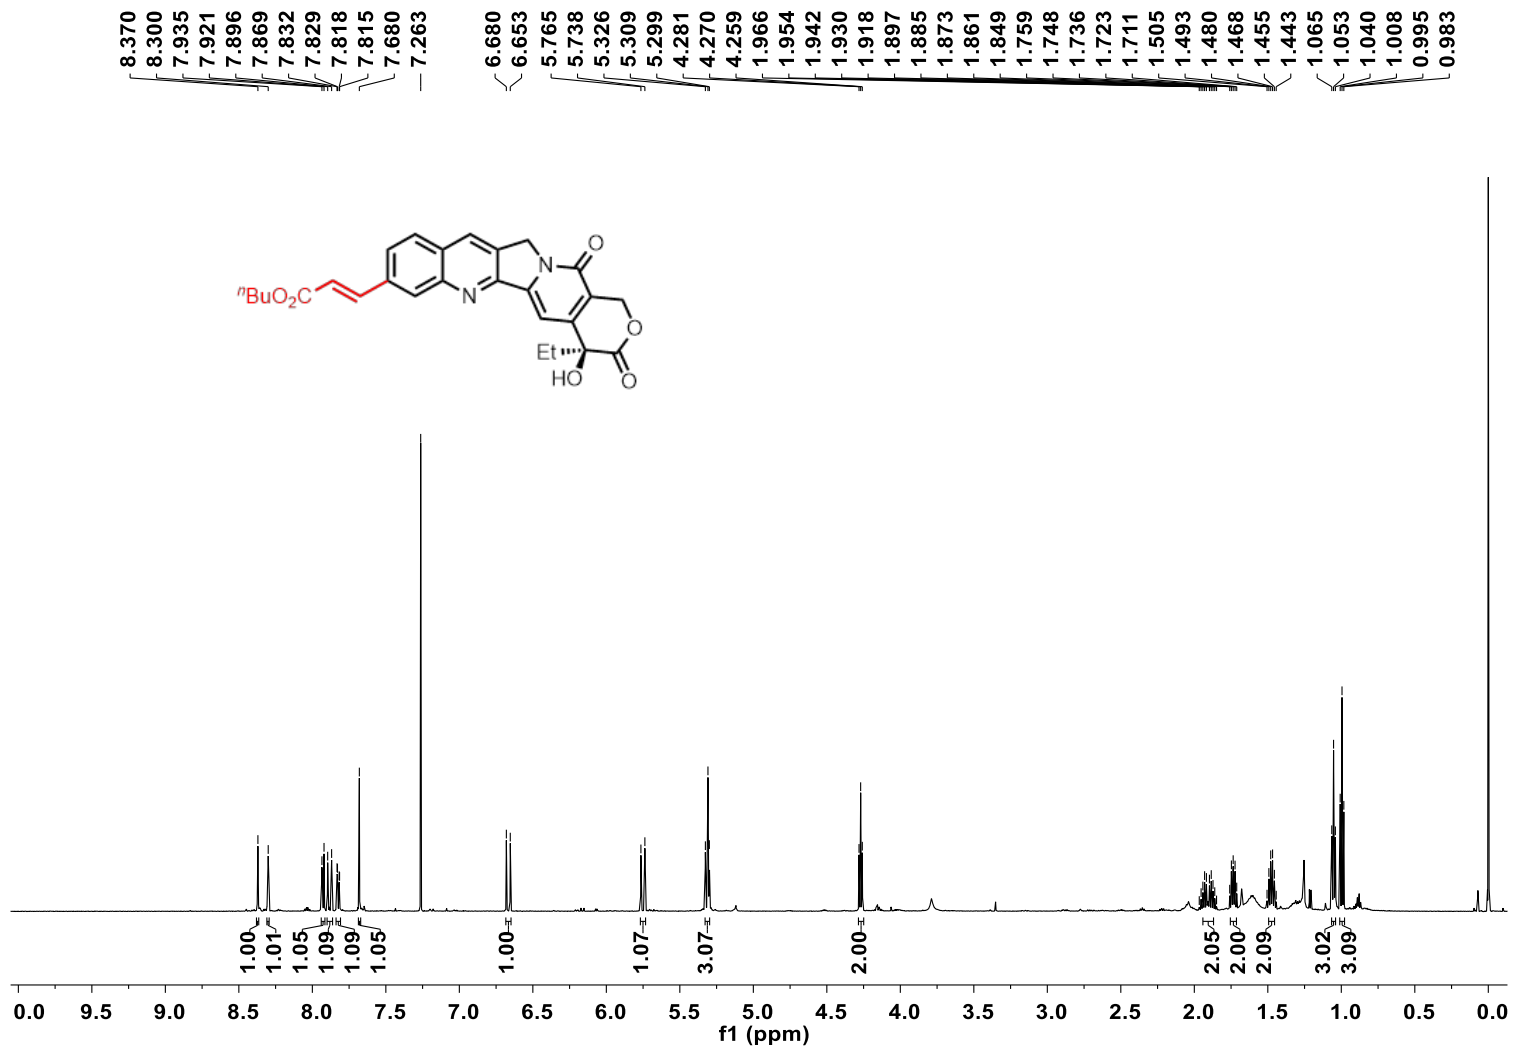

$^{13}\text{C}$  NMR (151 MHz,  $\text{CDCl}_3$ ) spectrum of **9**

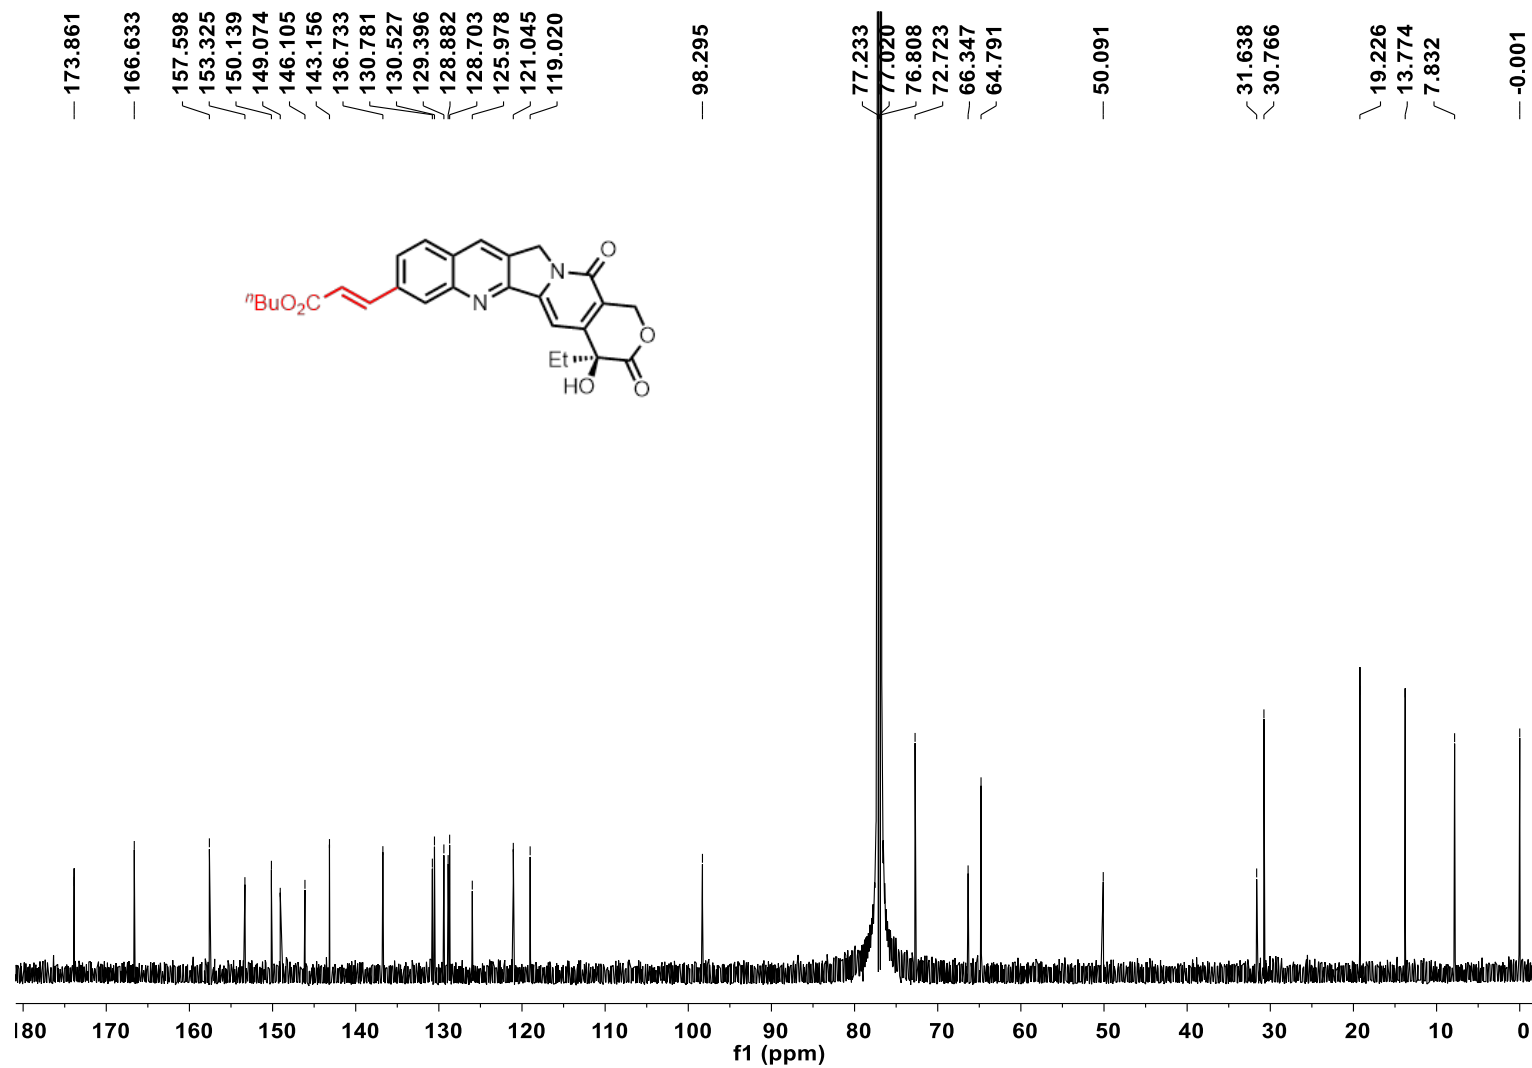

NOESY spectrum of **9**

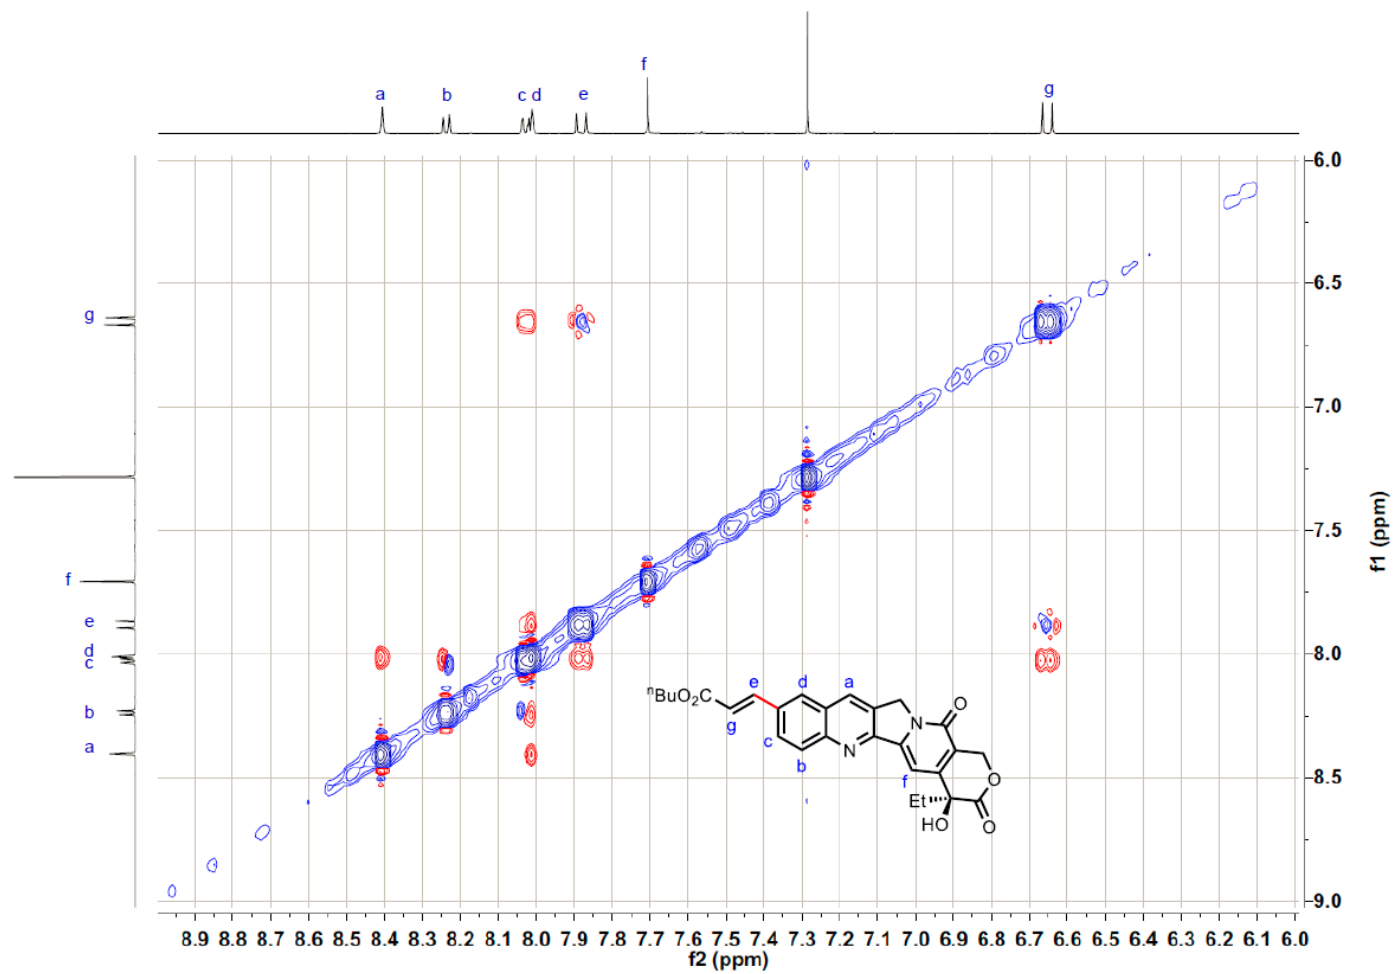

<sup>1</sup>H NMR (600 MHz, CDCl<sub>3</sub>) spectrum of **10**

8.713  
8.705  
8.365  
8.361  
8.346  
8.087  
8.060  
7.484  
7.308  
7.293  
7.264  
6.731  
6.704  
6.631  
6.622

4.303  
4.291  
4.279  
4.268  
4.060

1.360  
1.348  
1.336

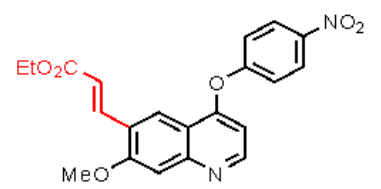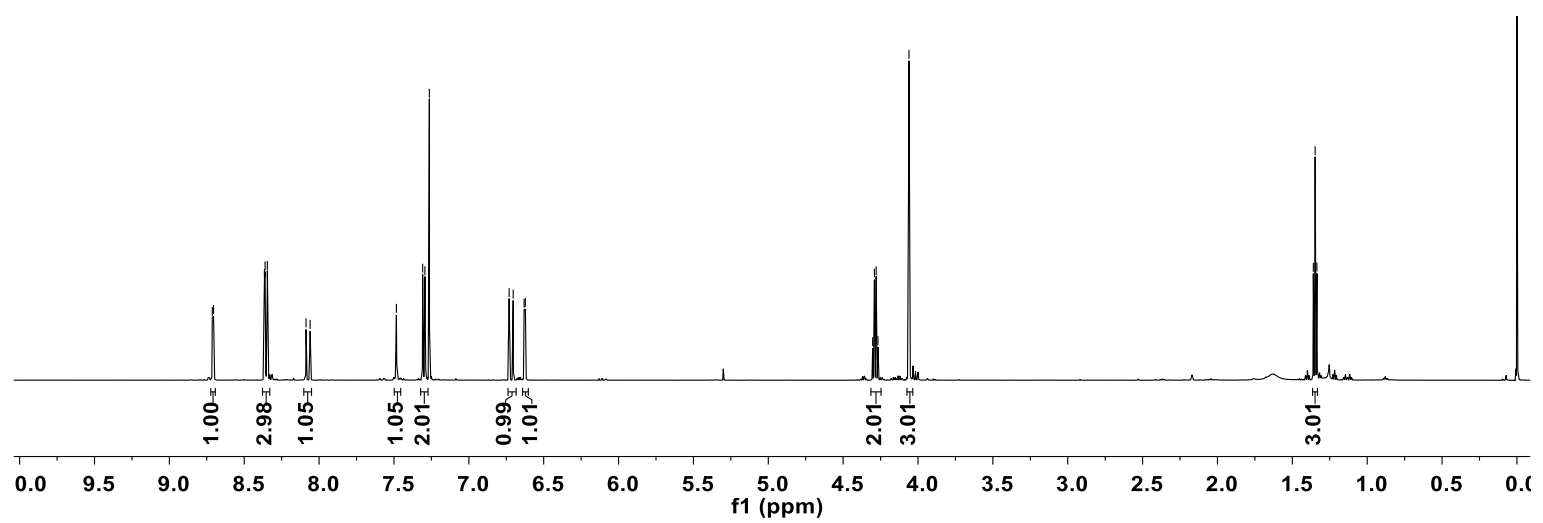

<sup>13</sup>C NMR (151 MHz, CDCl<sub>3</sub>) spectrum of **10**

— 166.970  
— 160.016  
— 159.998  
— 159.821  
— 152.372  
— 152.323  
— 144.712  
— 139.186  
— 126.274  
— 126.254  
— 122.417  
— 121.479  
— 120.343  
— 116.121  
— 107.669  
— 105.238  
— 77.236  
— 77.024  
— 76.812  
— 60.643  
— 55.958  
— 14.350

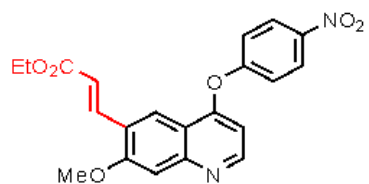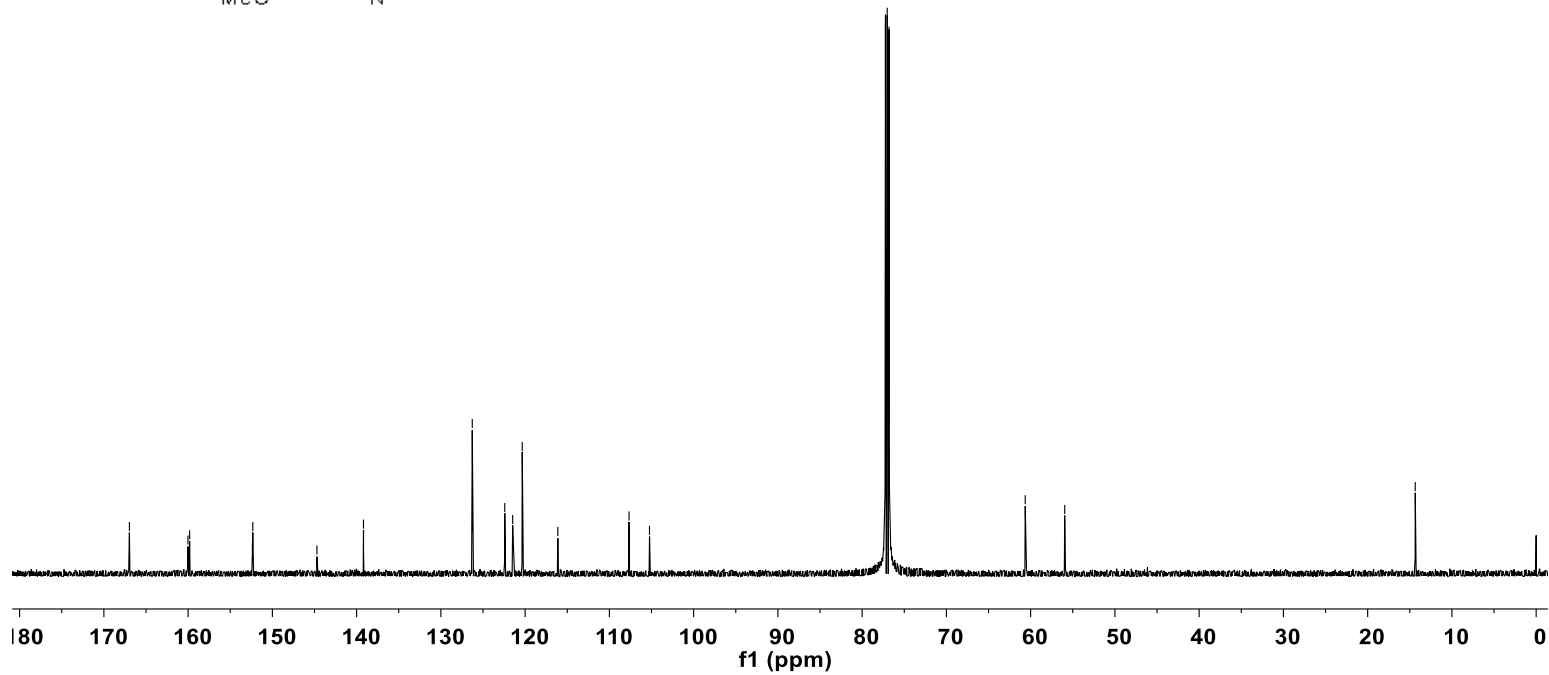



<sup>1</sup>H NMR (600 MHz, CDCl<sub>3</sub>) spectrum of **11**

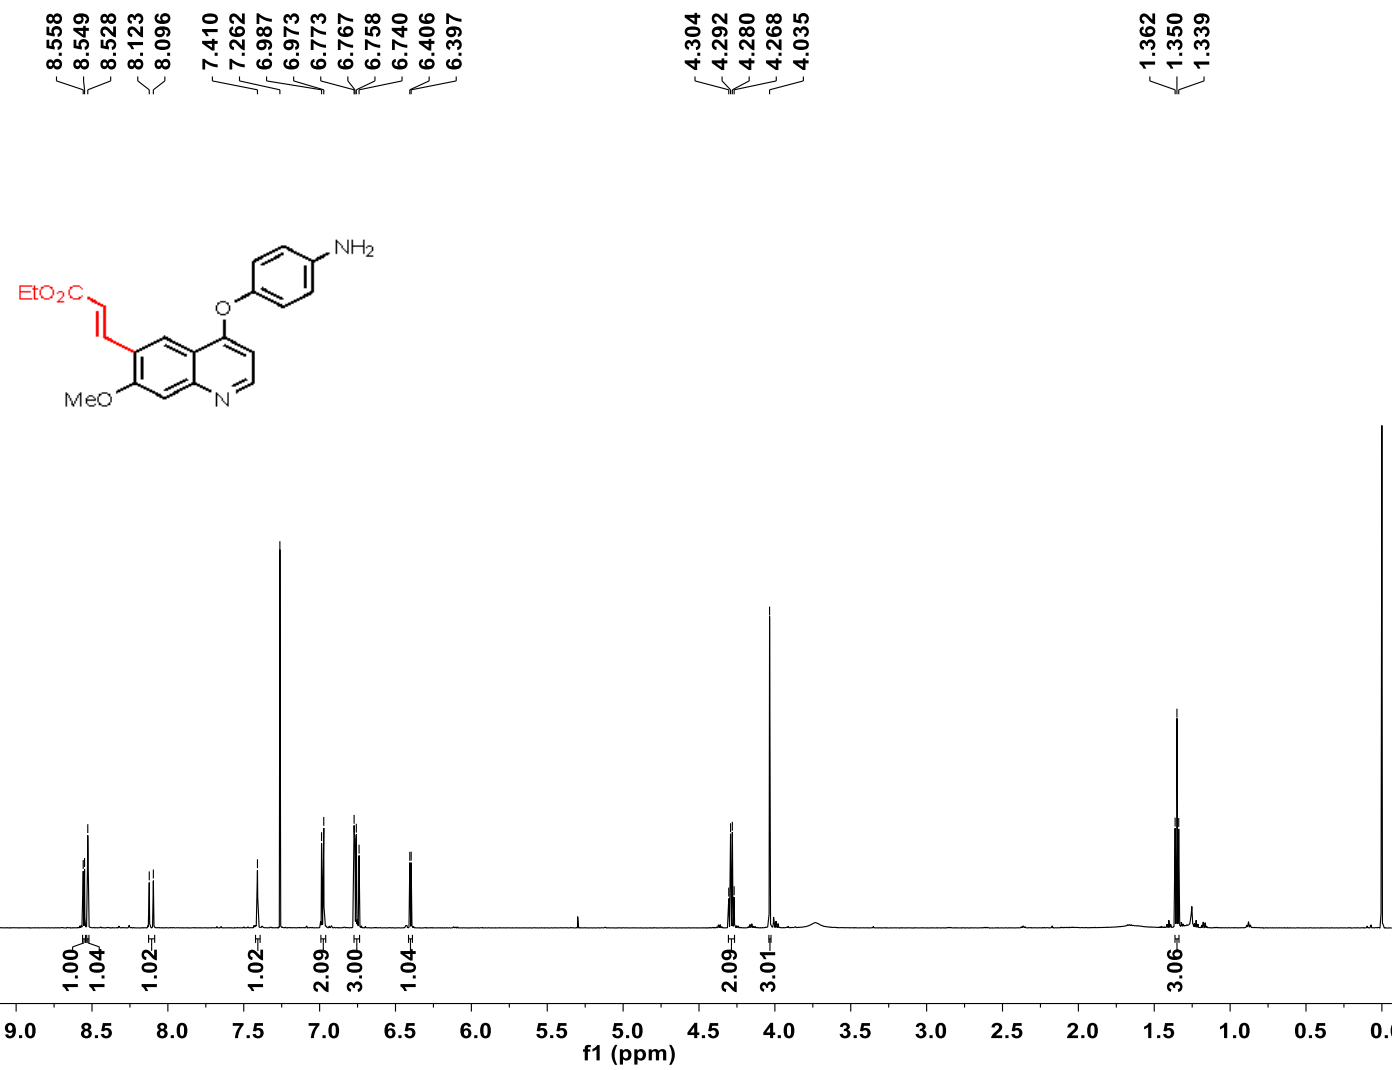

<sup>13</sup>C NMR (151 MHz, CDCl<sub>3</sub>) spectrum of **11**

- 167.214
- 163.052
- 159.426
- 152.534
- 151.868
- 145.805
- 144.335
- 139.652
- 125.085
- 123.124
- 122.167
- 120.706
- 116.308
- 115.849
- 107.281
- 102.498
- 77.232
- 77.020
- 76.808
- 60.493
- 55.800
- 14.366

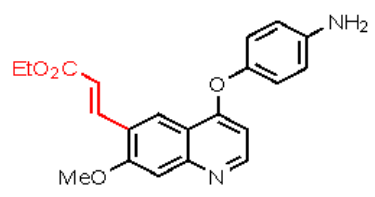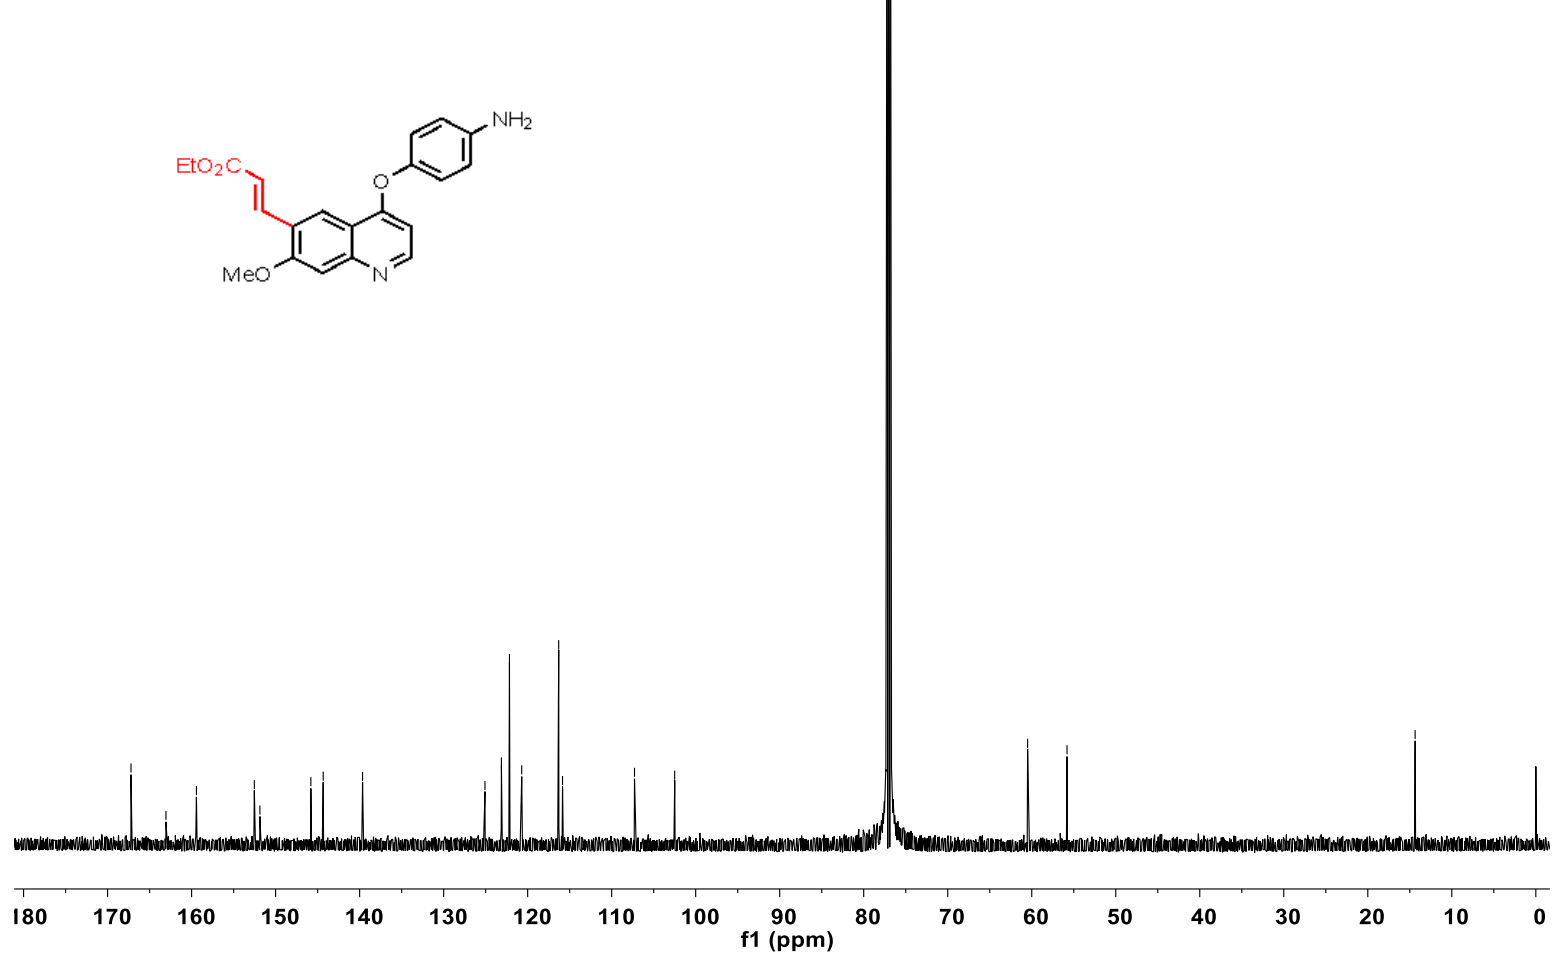

<sup>1</sup>H NMR (600 MHz, CDCl<sub>3</sub>) spectrum of **12**

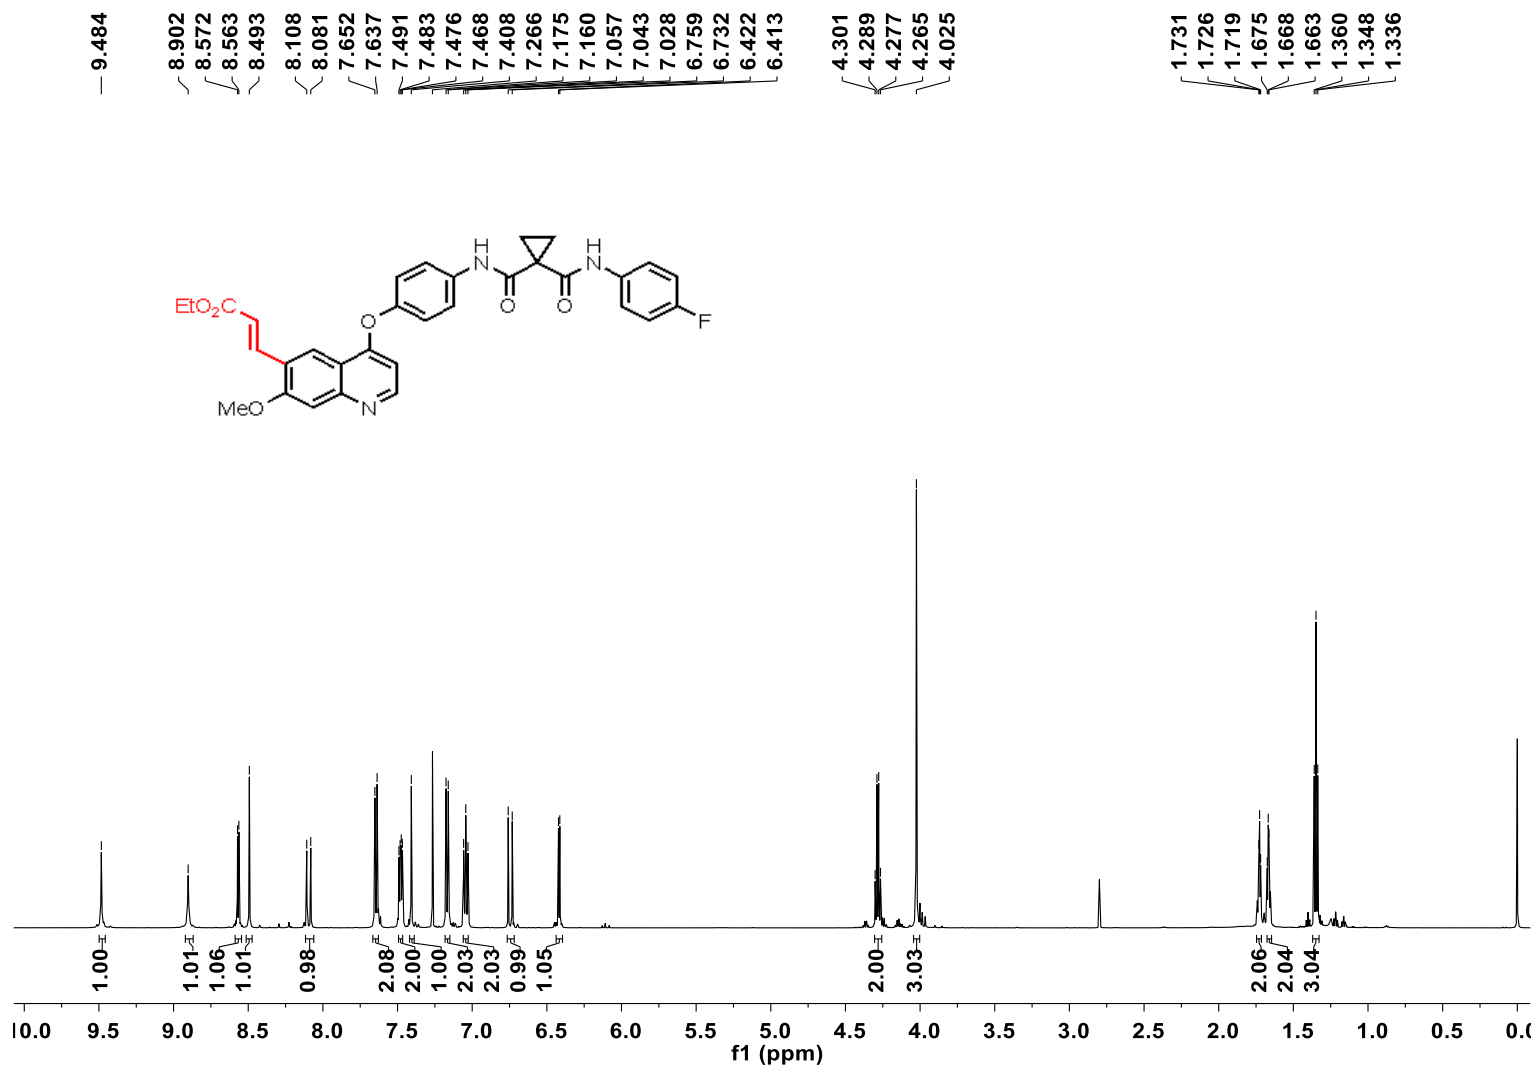

<sup>13</sup>C NMR (151 MHz, CDCl<sub>3</sub>) spectrum of **12**

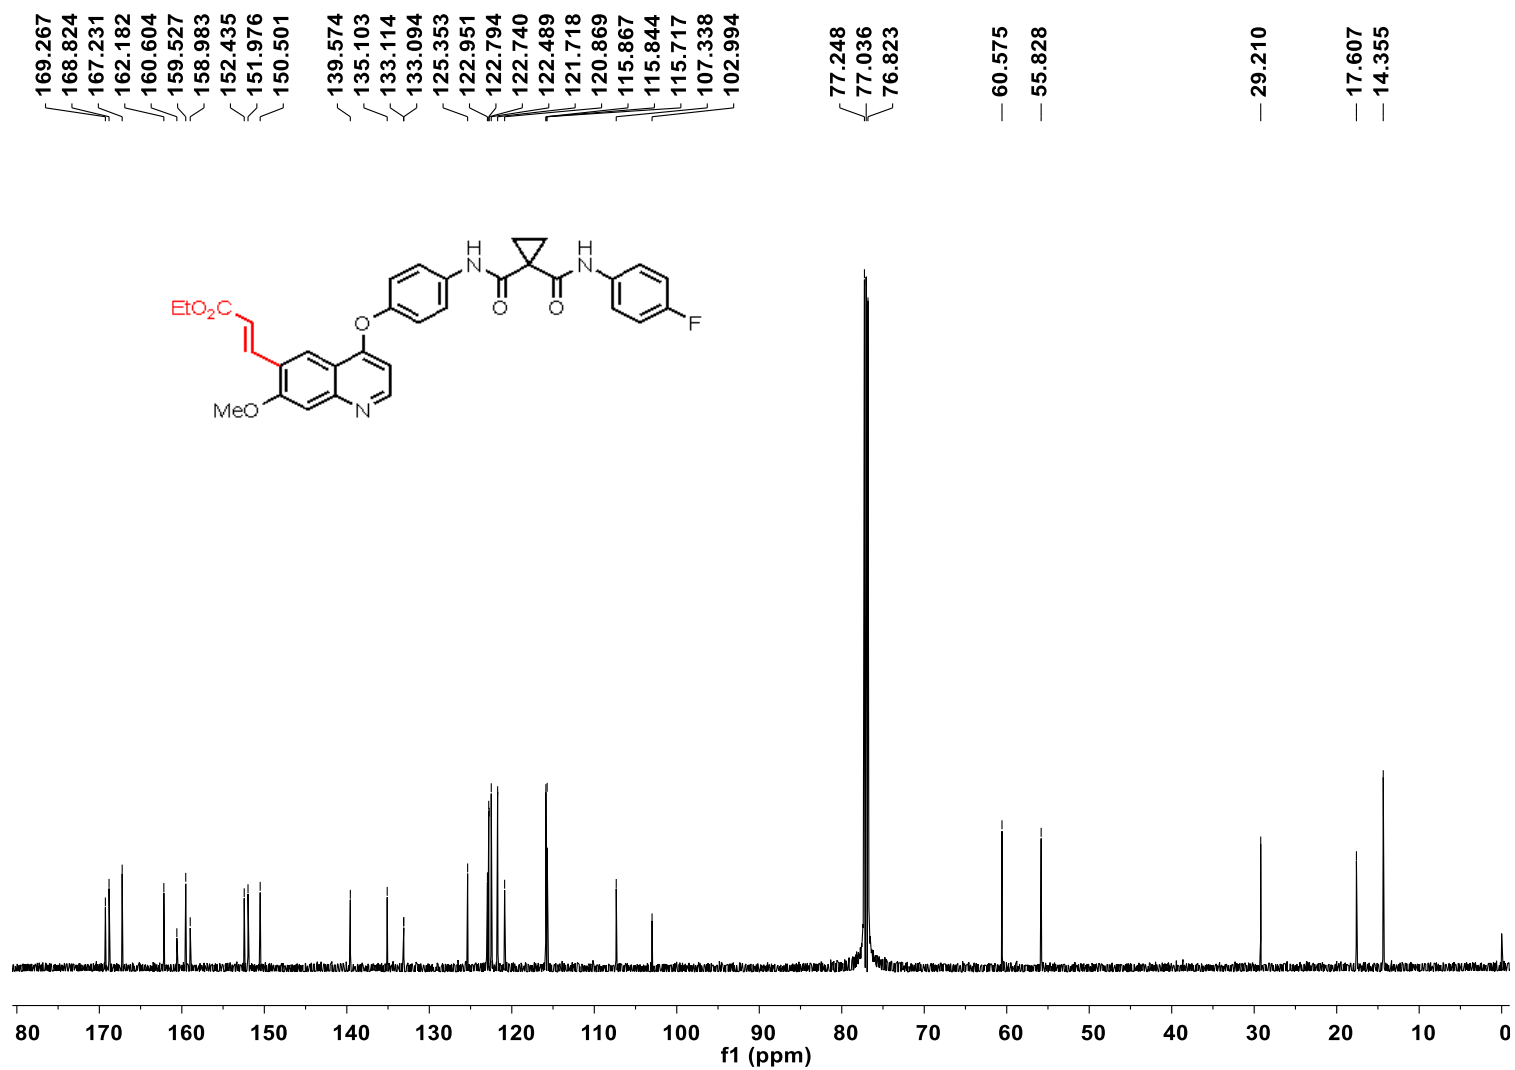

$^{19}\text{F}$  NMR (376 MHz,  $\text{CDCl}_3$ ) spectrum of **12**

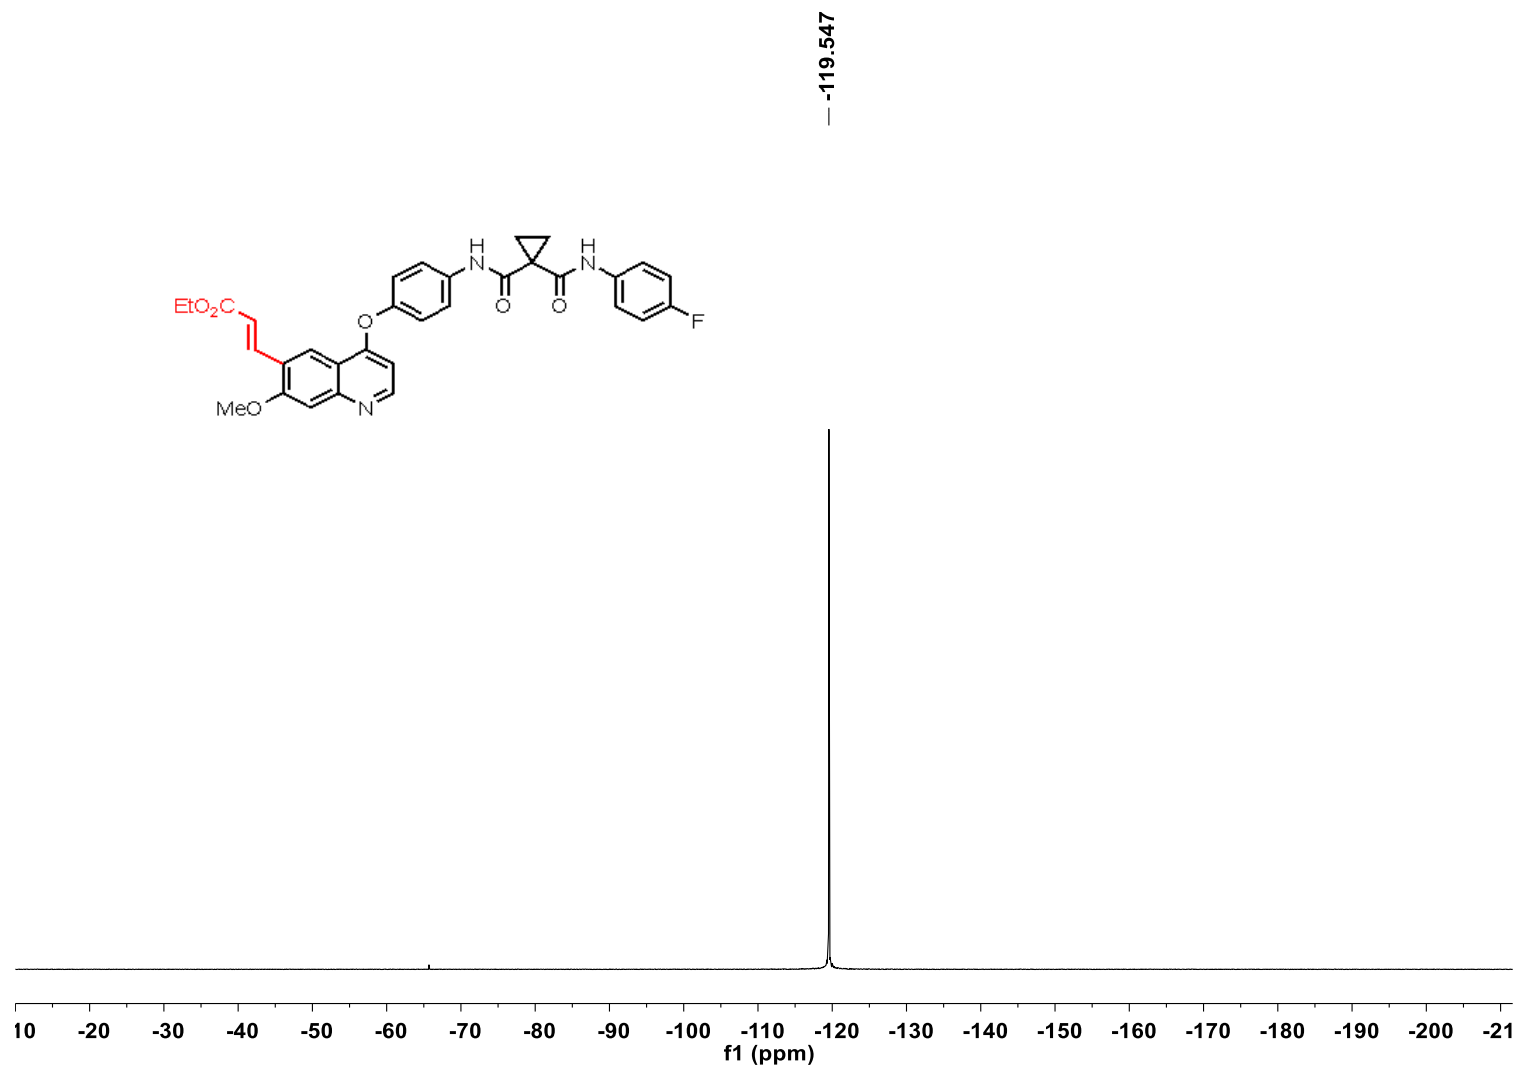

<sup>1</sup>H NMR (600 MHz, CDCl<sub>3</sub>) spectrum of **13**

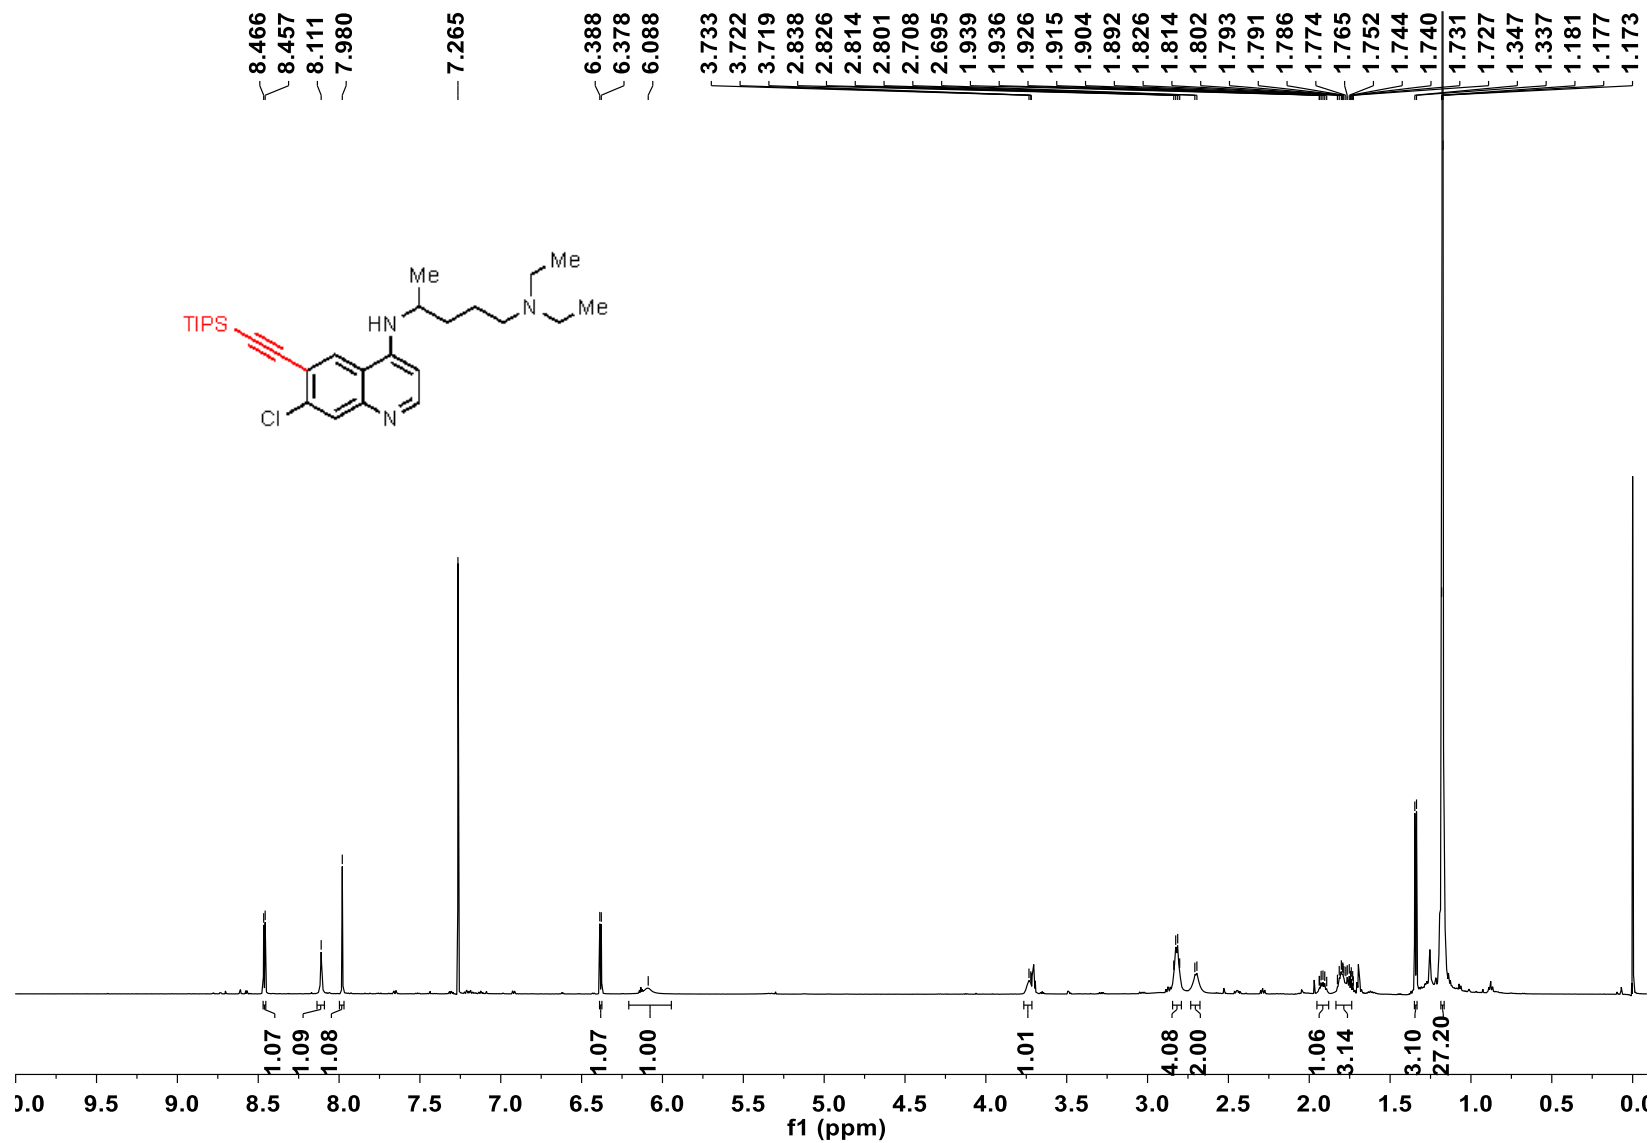

<sup>13</sup>C NMR (151 MHz, CDCl<sub>3</sub>) spectrum of **13**

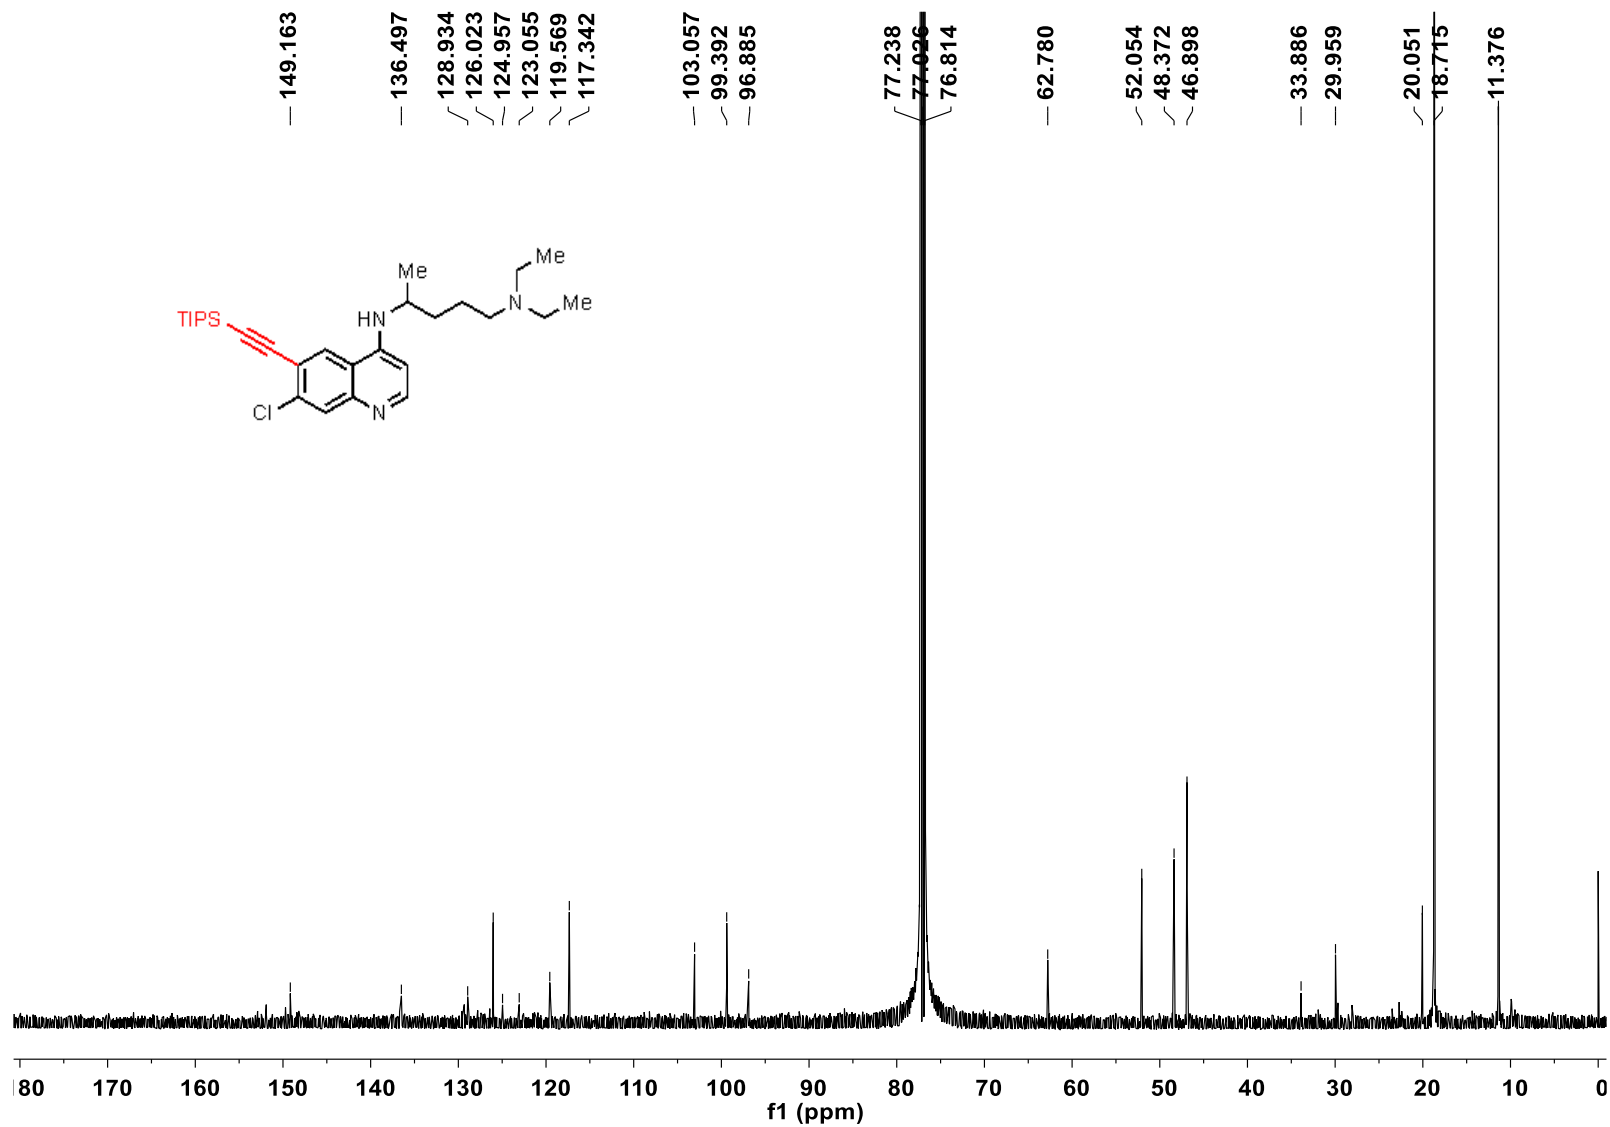

<sup>1</sup>H NMR (600 MHz, CDCl<sub>3</sub>) spectrum of **14**

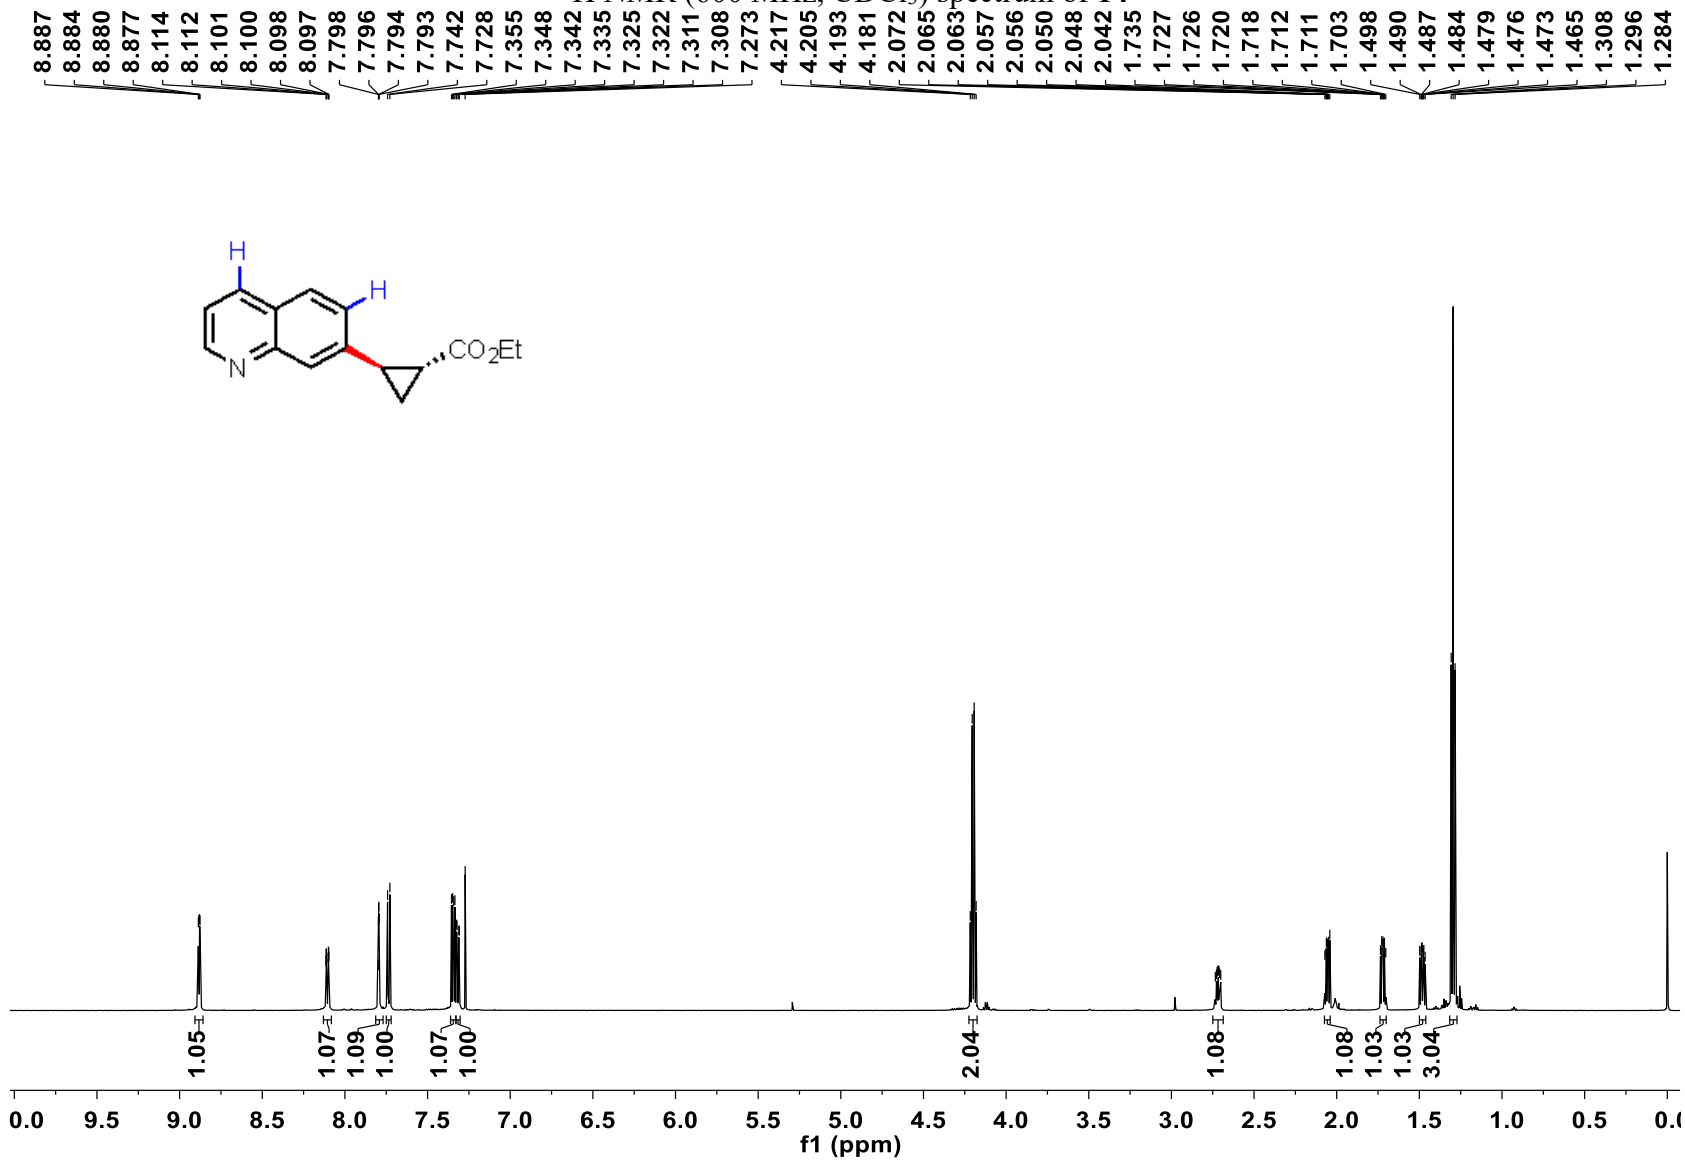



<sup>13</sup>C NMR (151 MHz, CDCl<sub>3</sub>) spectrum of **14**

— 173.134

150.776  
148.333  
141.953  
135.729

127.901  
127.012  
125.761  
125.688  
120.693

77.265  
77.053  
76.842

— 60.857

26.248  
24.698

— 17.370  
— 14.272

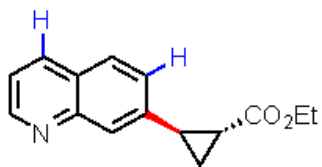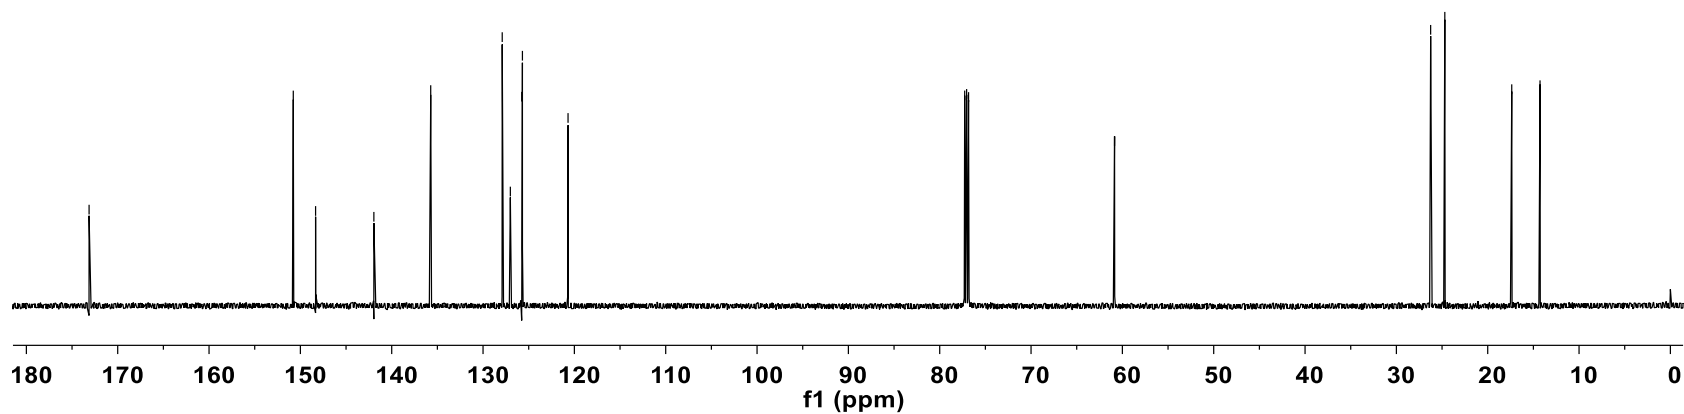

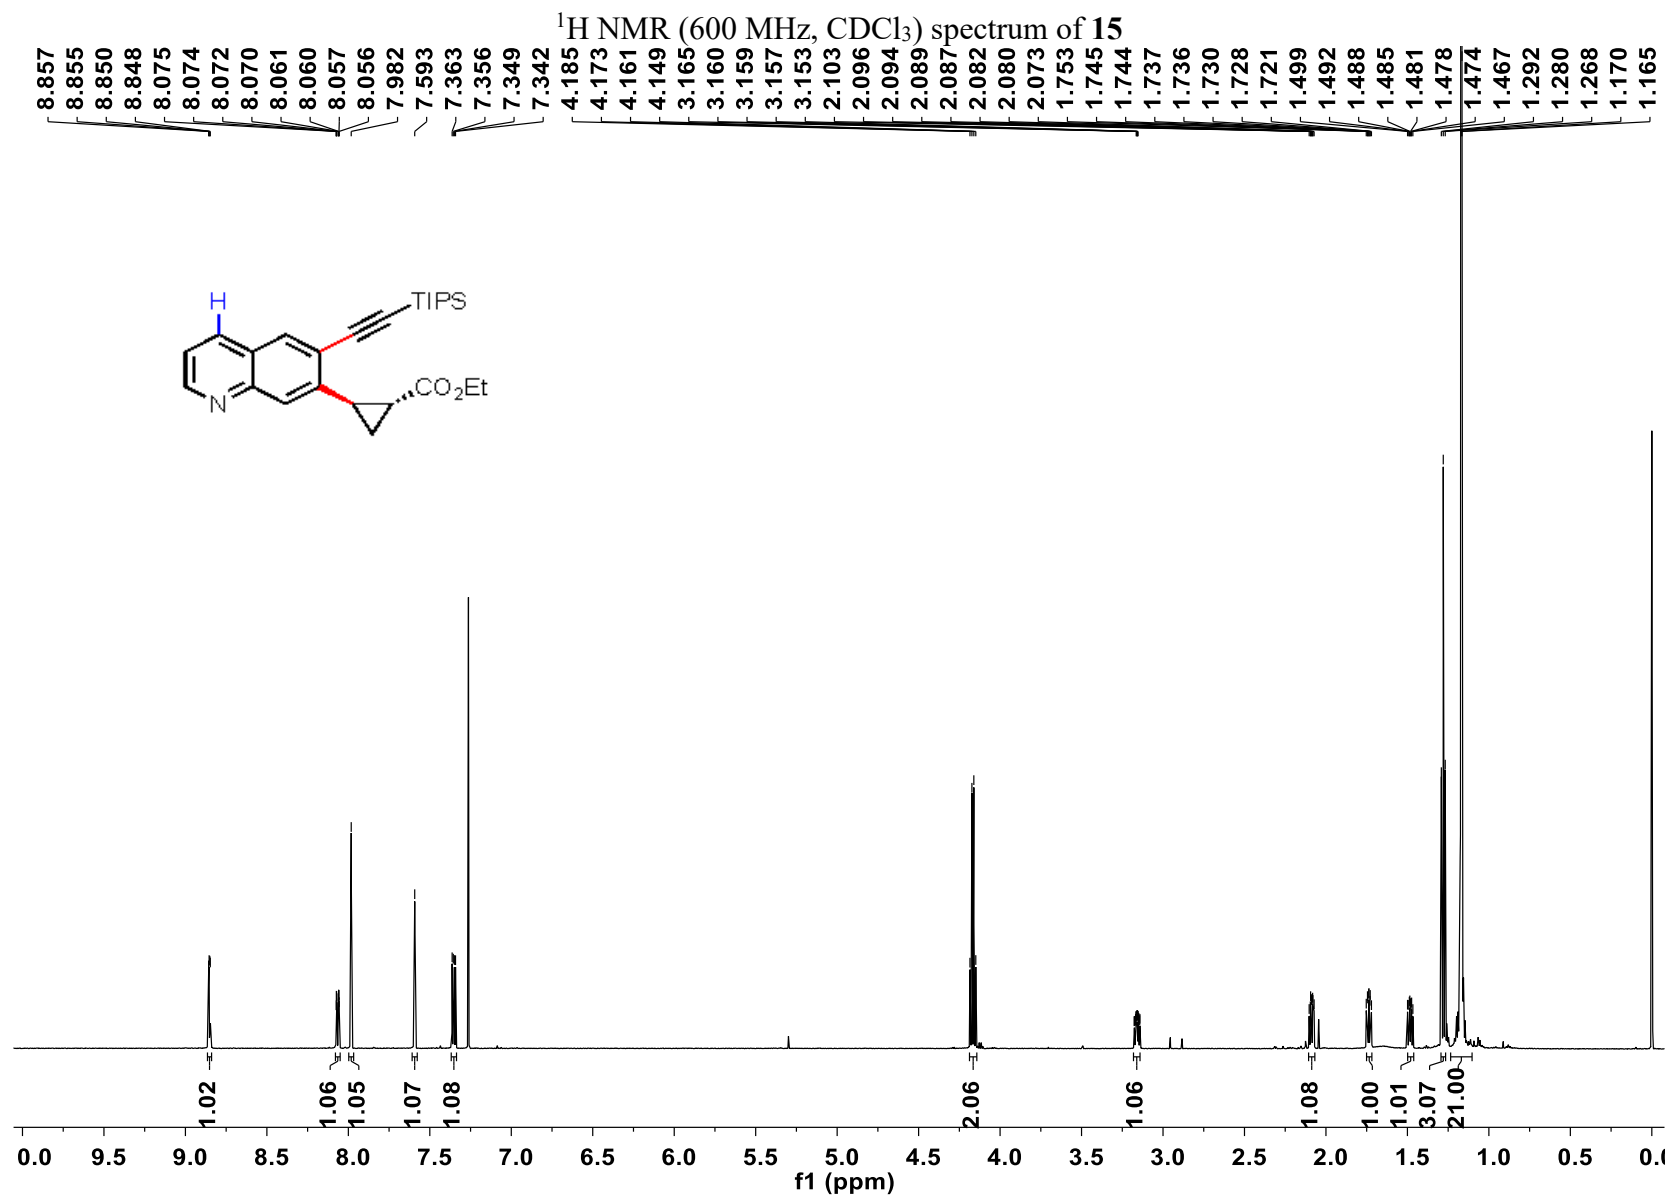

<sup>13</sup>C NMR (151 MHz, CDCl<sub>3</sub>) spectrum of **15**

— 172.779  
~ 151.238  
~ 147.782  
~ 142.922  
~ 135.237  
~ 132.476  
~ 126.531  
~ 124.185  
~ 123.103  
~ 121.298  
— 104.439  
— 96.688  
77.233  
77.022  
76.810  
— 60.701  
24.541  
24.497  
18.710  
17.286  
14.223  
11.332

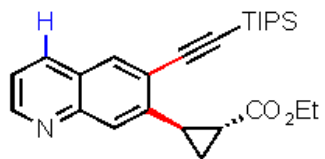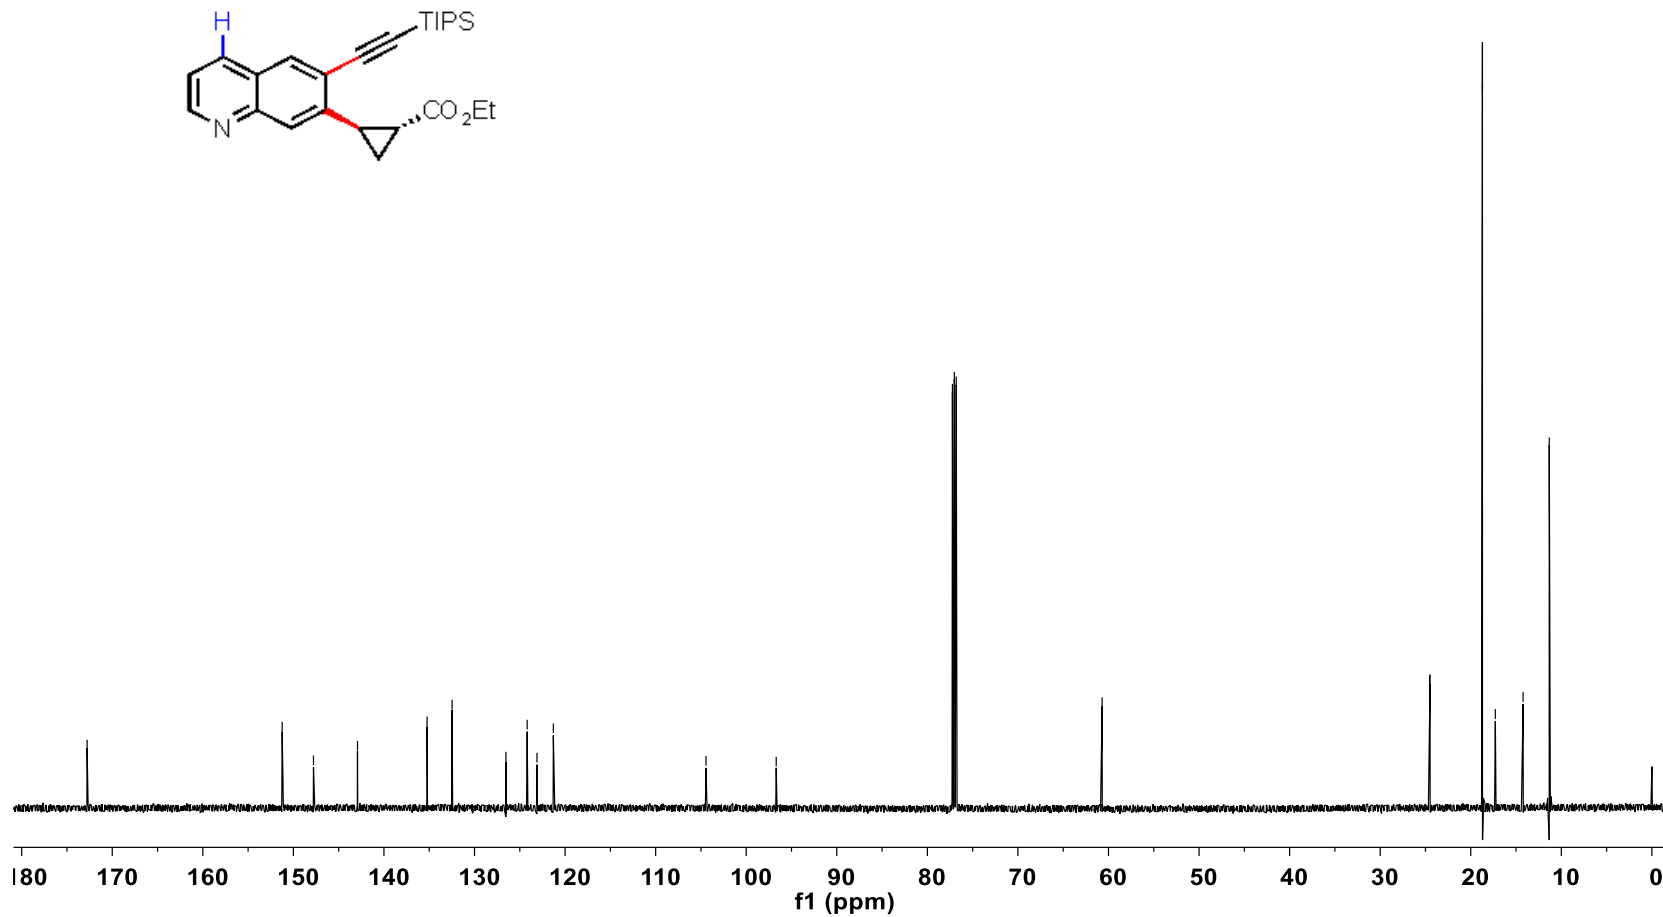

<sup>1</sup>H NMR (600 MHz, CDCl<sub>3</sub>) spectrum of **16**

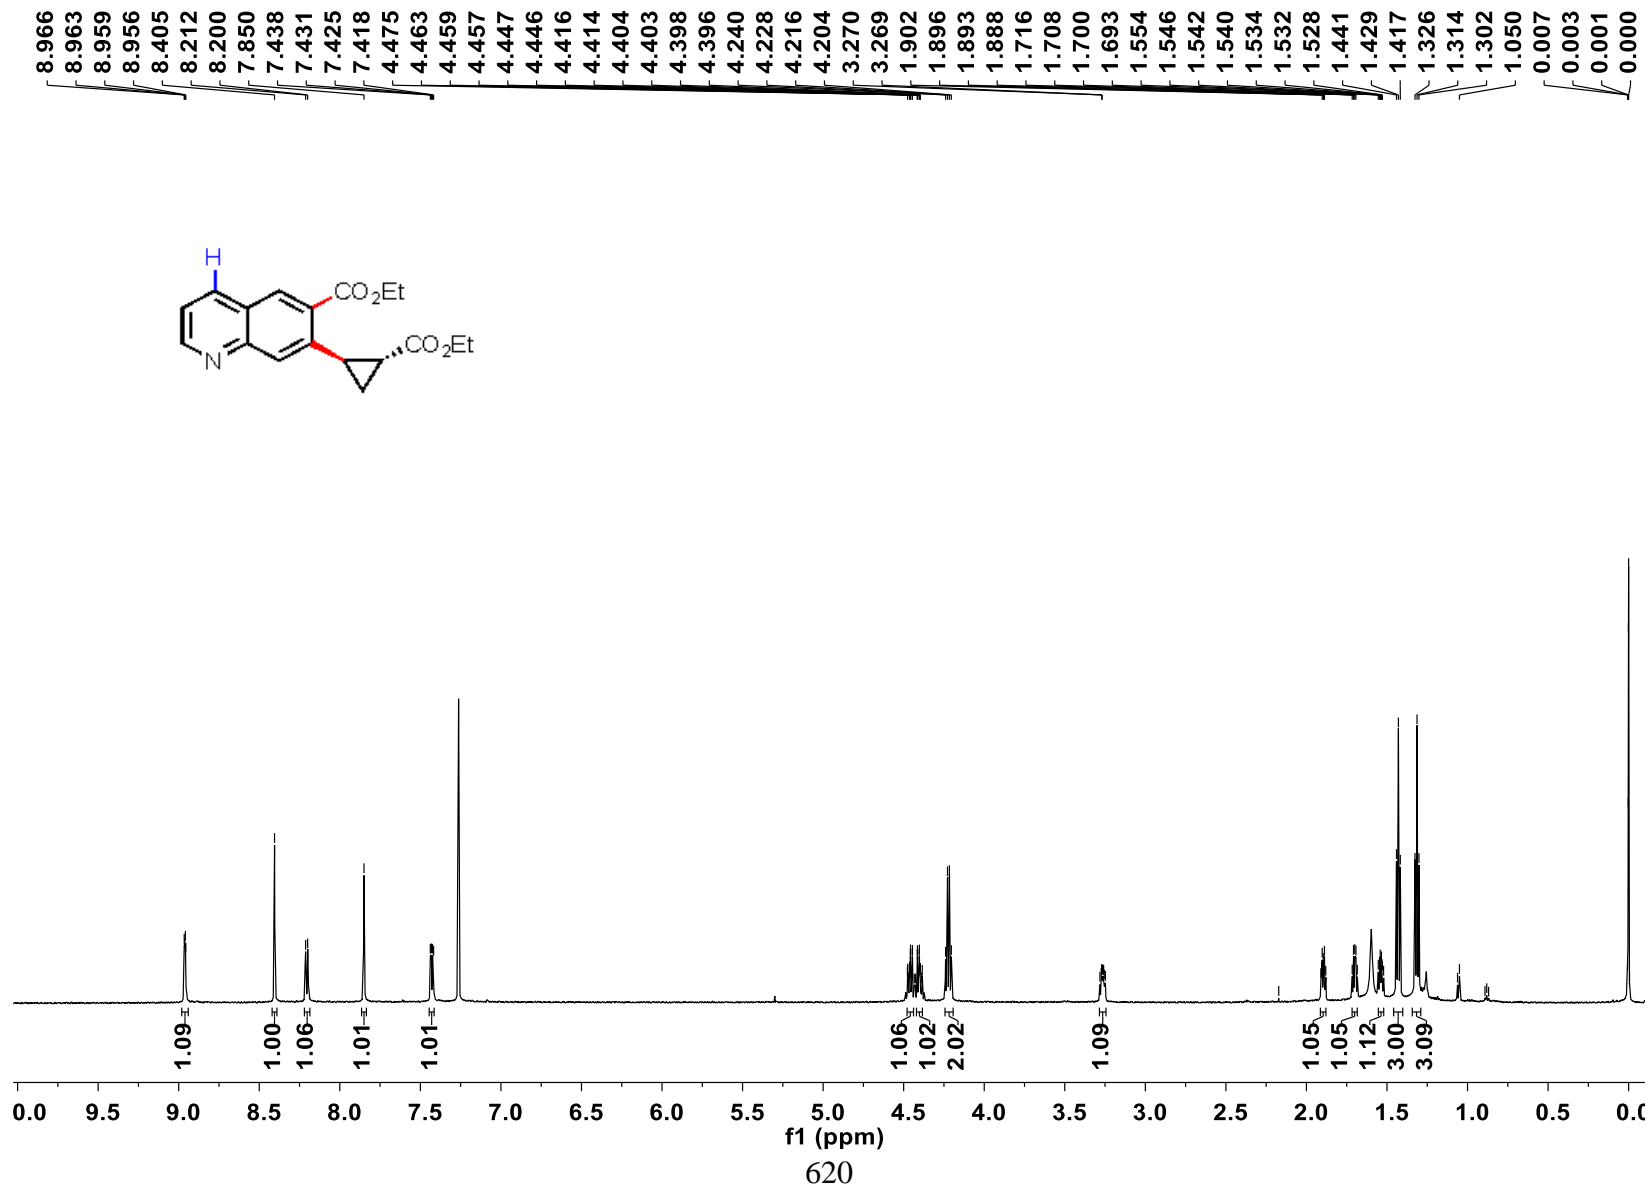

<sup>13</sup>C NMR (151 MHz, CDCl<sub>3</sub>) spectrum of **16**

- 173.408
- 167.042
- 152.575
- 149.239
- 140.784
- 136.613
- 131.509
- 130.605
- 127.750
- 126.200
- 121.661
- 77.232
- 77.021
- 76.809
- 61.543
- 60.682
- 25.553
- 23.803
- 15.913
- 14.320
- 14.269

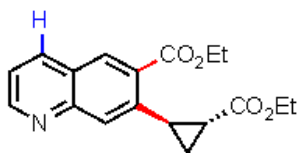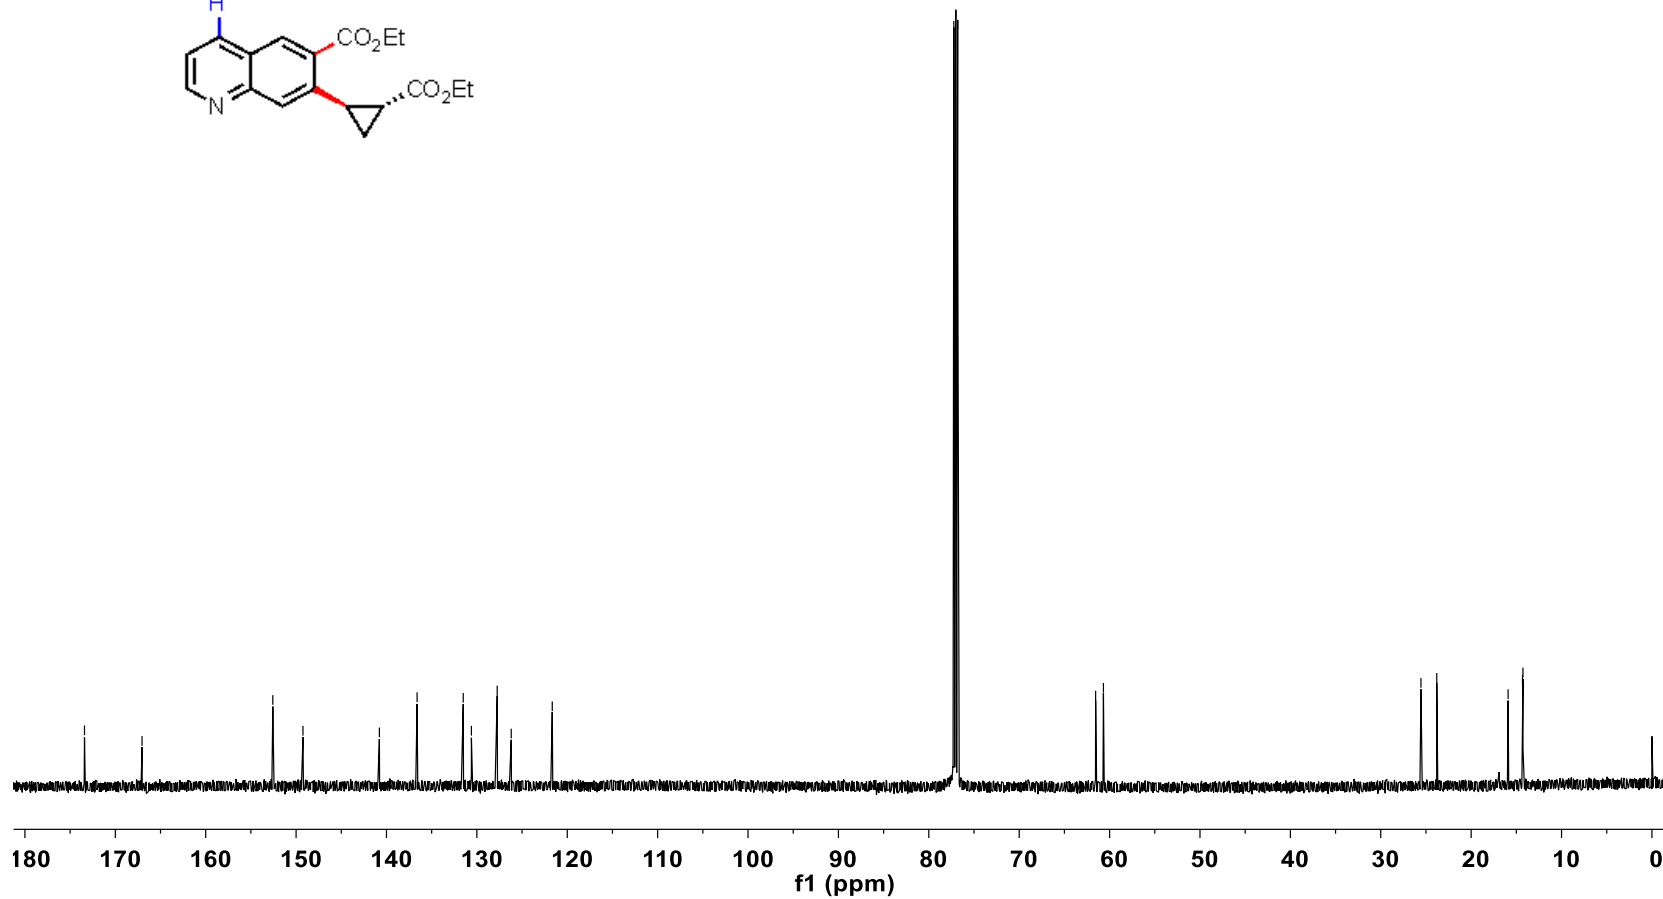

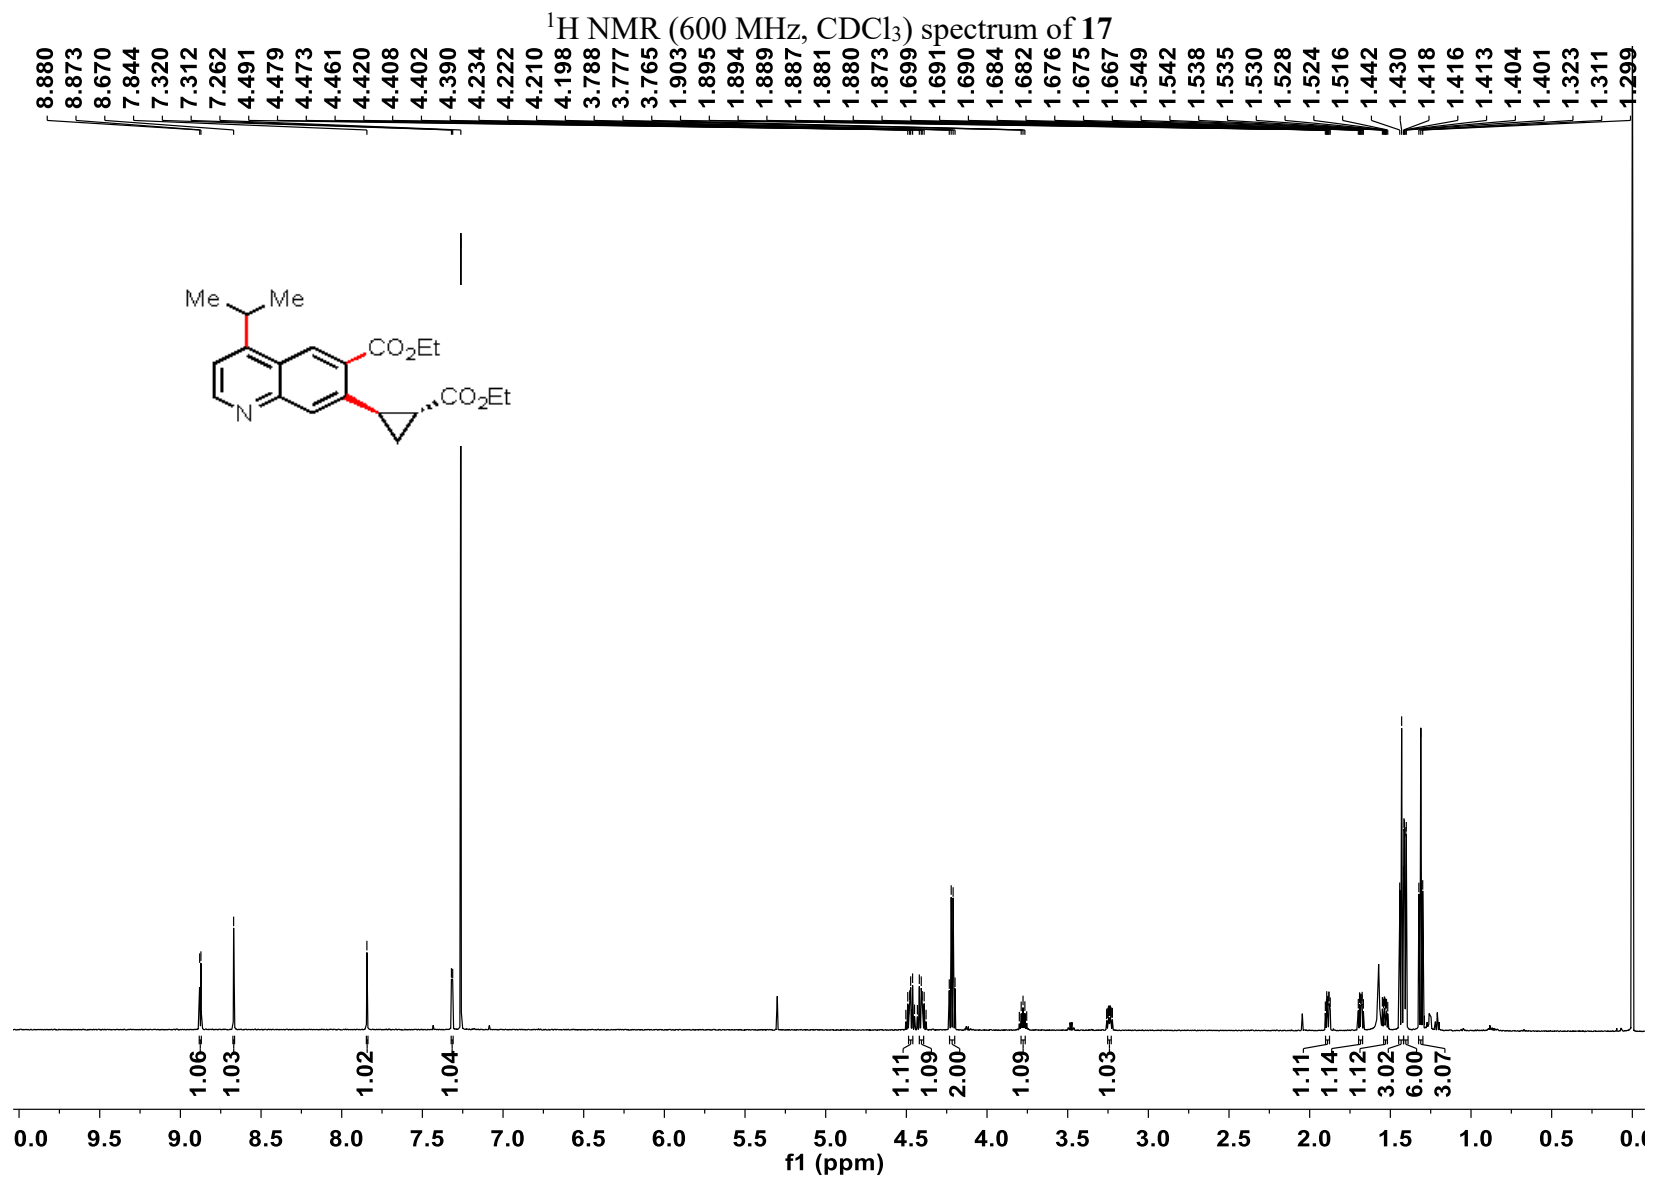

<sup>13</sup>C NMR (151 MHz, CDCl<sub>3</sub>) spectrum of **17**

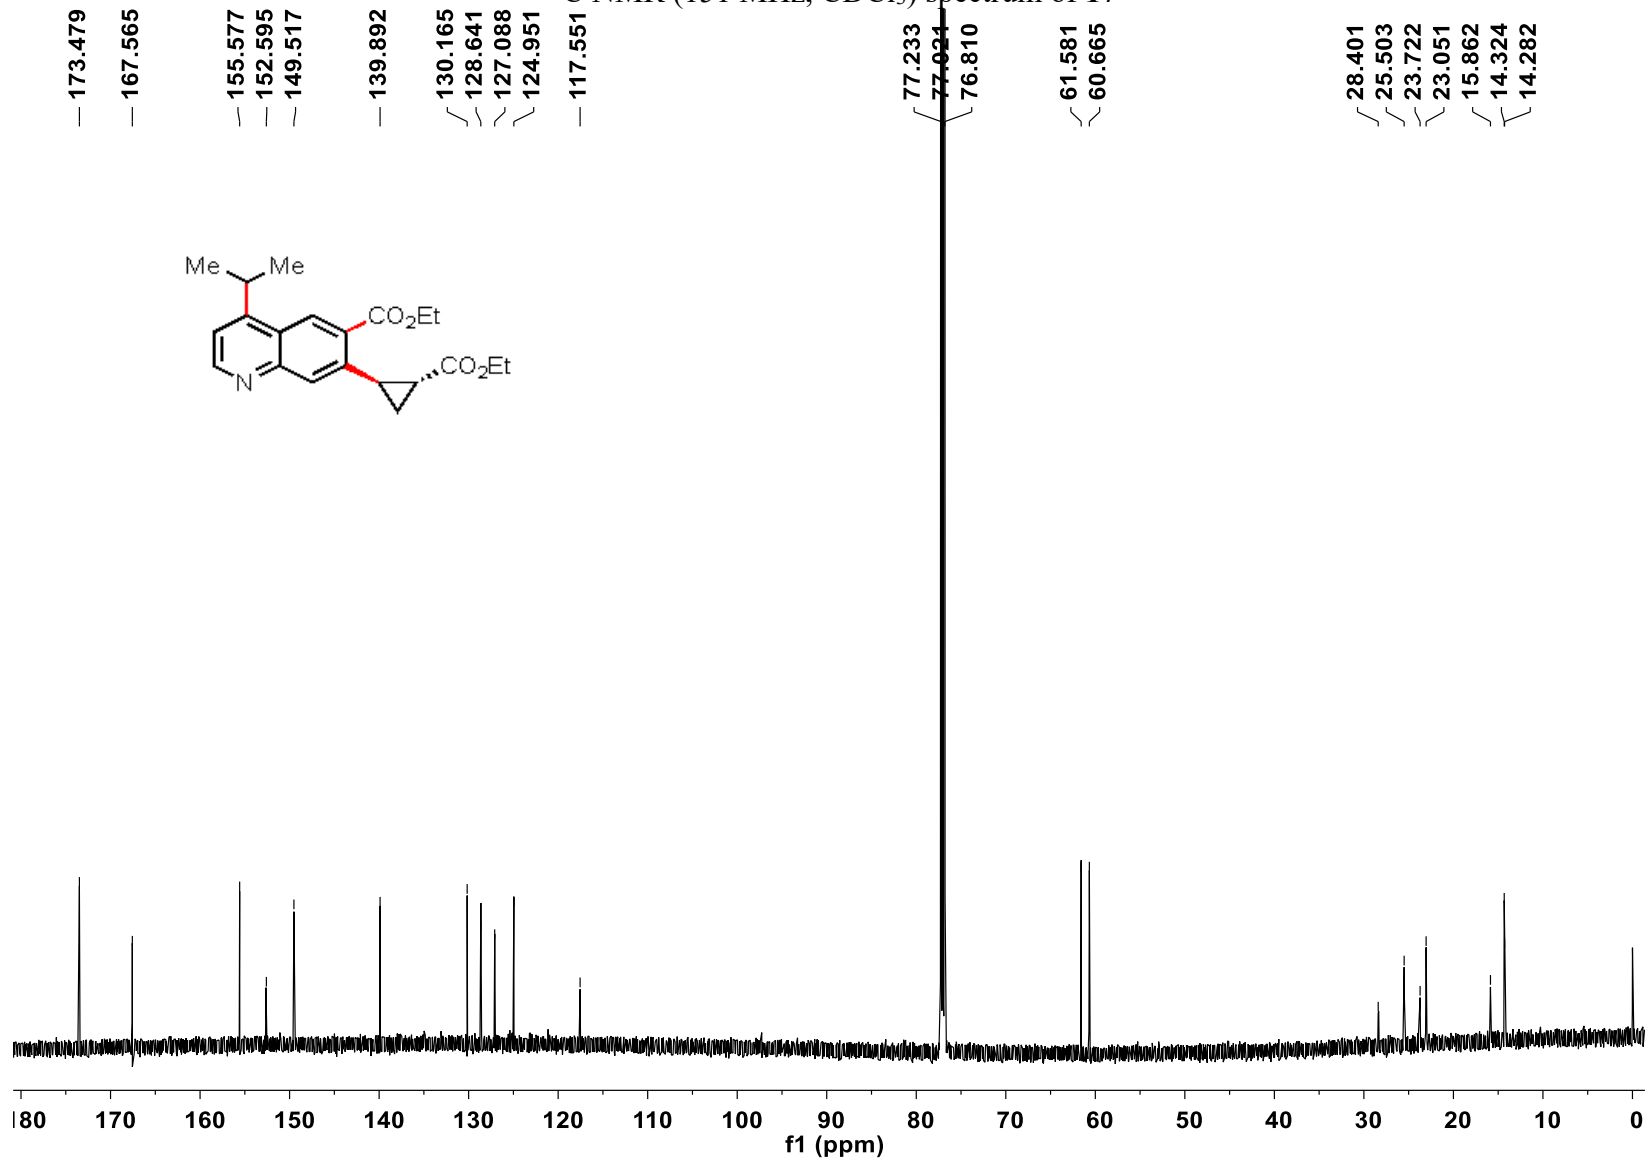

<sup>1</sup>H NMR (600 MHz, CDCl<sub>3</sub>) spectrum of **18**

8.773  
8.770  
7.926  
7.924  
7.875  
7.874  
7.872  
7.703  
7.689  
7.410  
7.407  
7.396  
7.393  
7.263

4.158  
4.147  
4.136  
4.135  
4.124  
4.112  
3.171  
3.158  
3.145  
3.141  
3.128  
3.116  
2.749  
2.737  
2.724  
2.712

1.252  
1.240  
1.238  
1.228  
1.226  
1.214

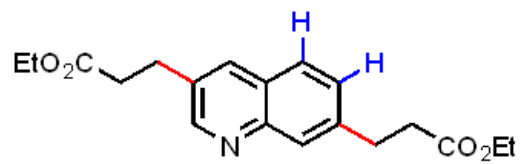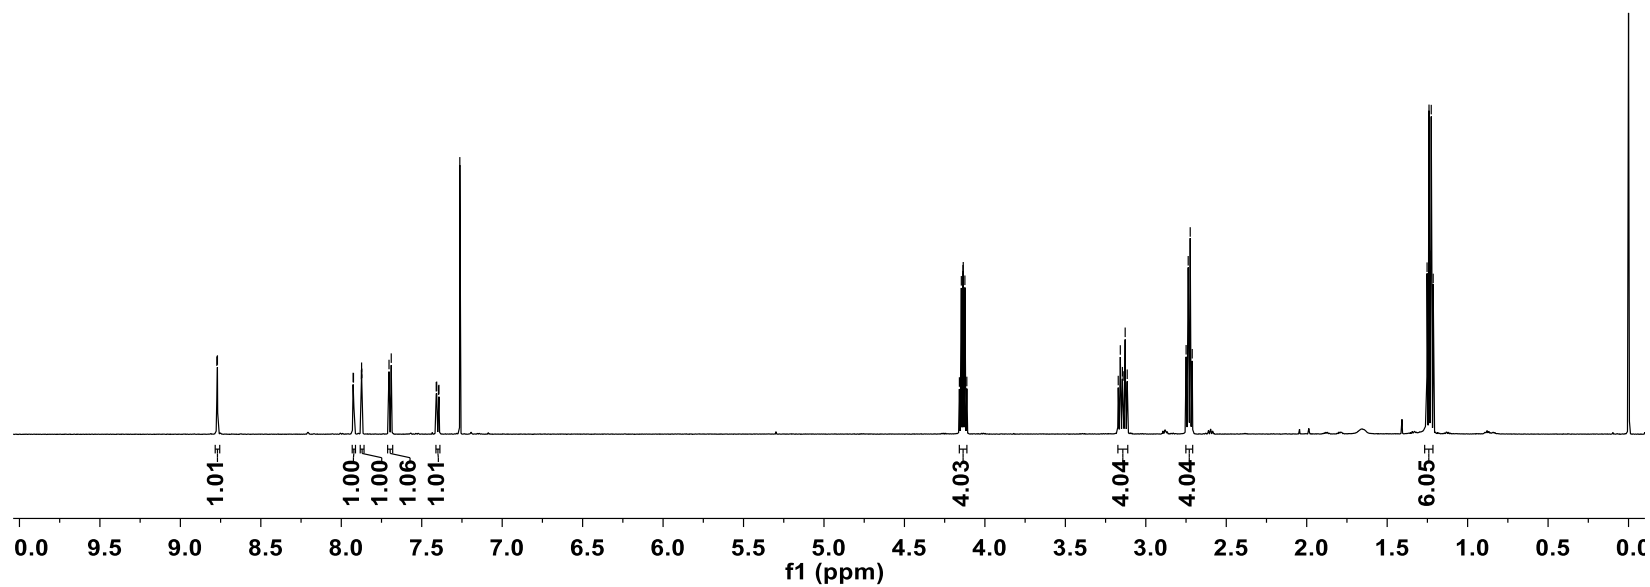



<sup>13</sup>C NMR (151 MHz, CDCl<sub>3</sub>) spectrum of **18**

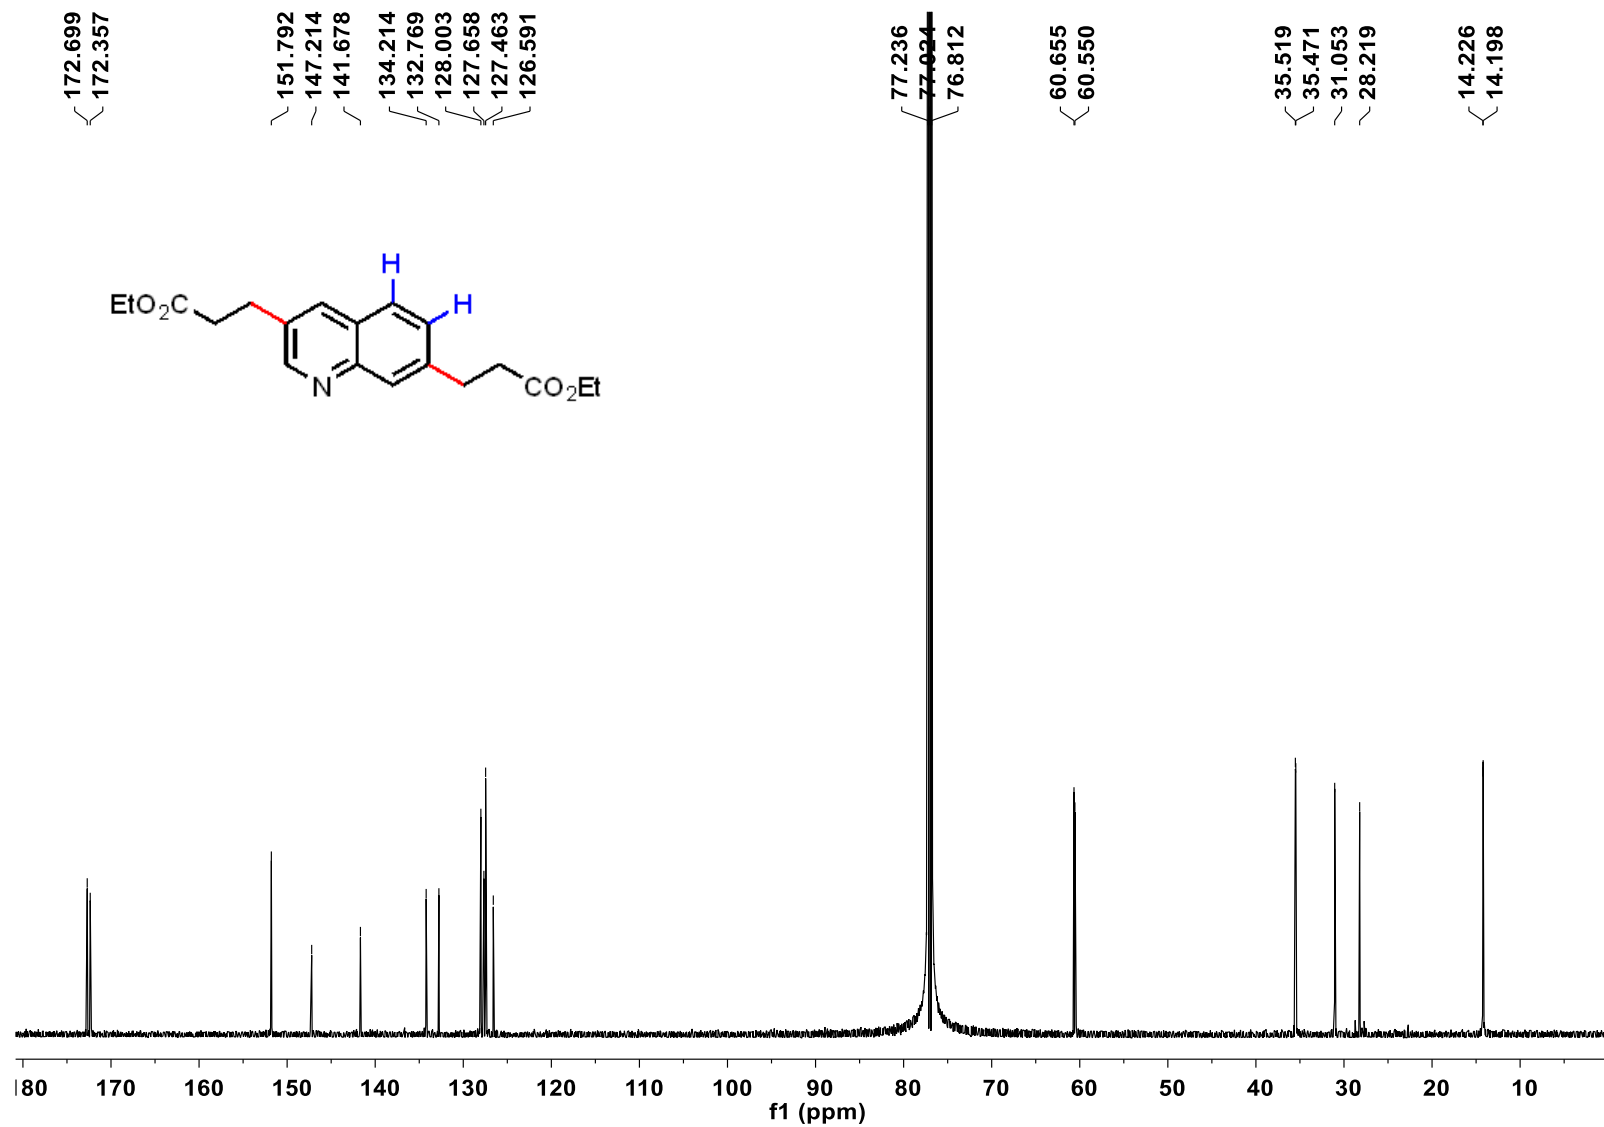

<sup>1</sup>H NMR (600 MHz, CDCl<sub>3</sub>) spectrum of **19**

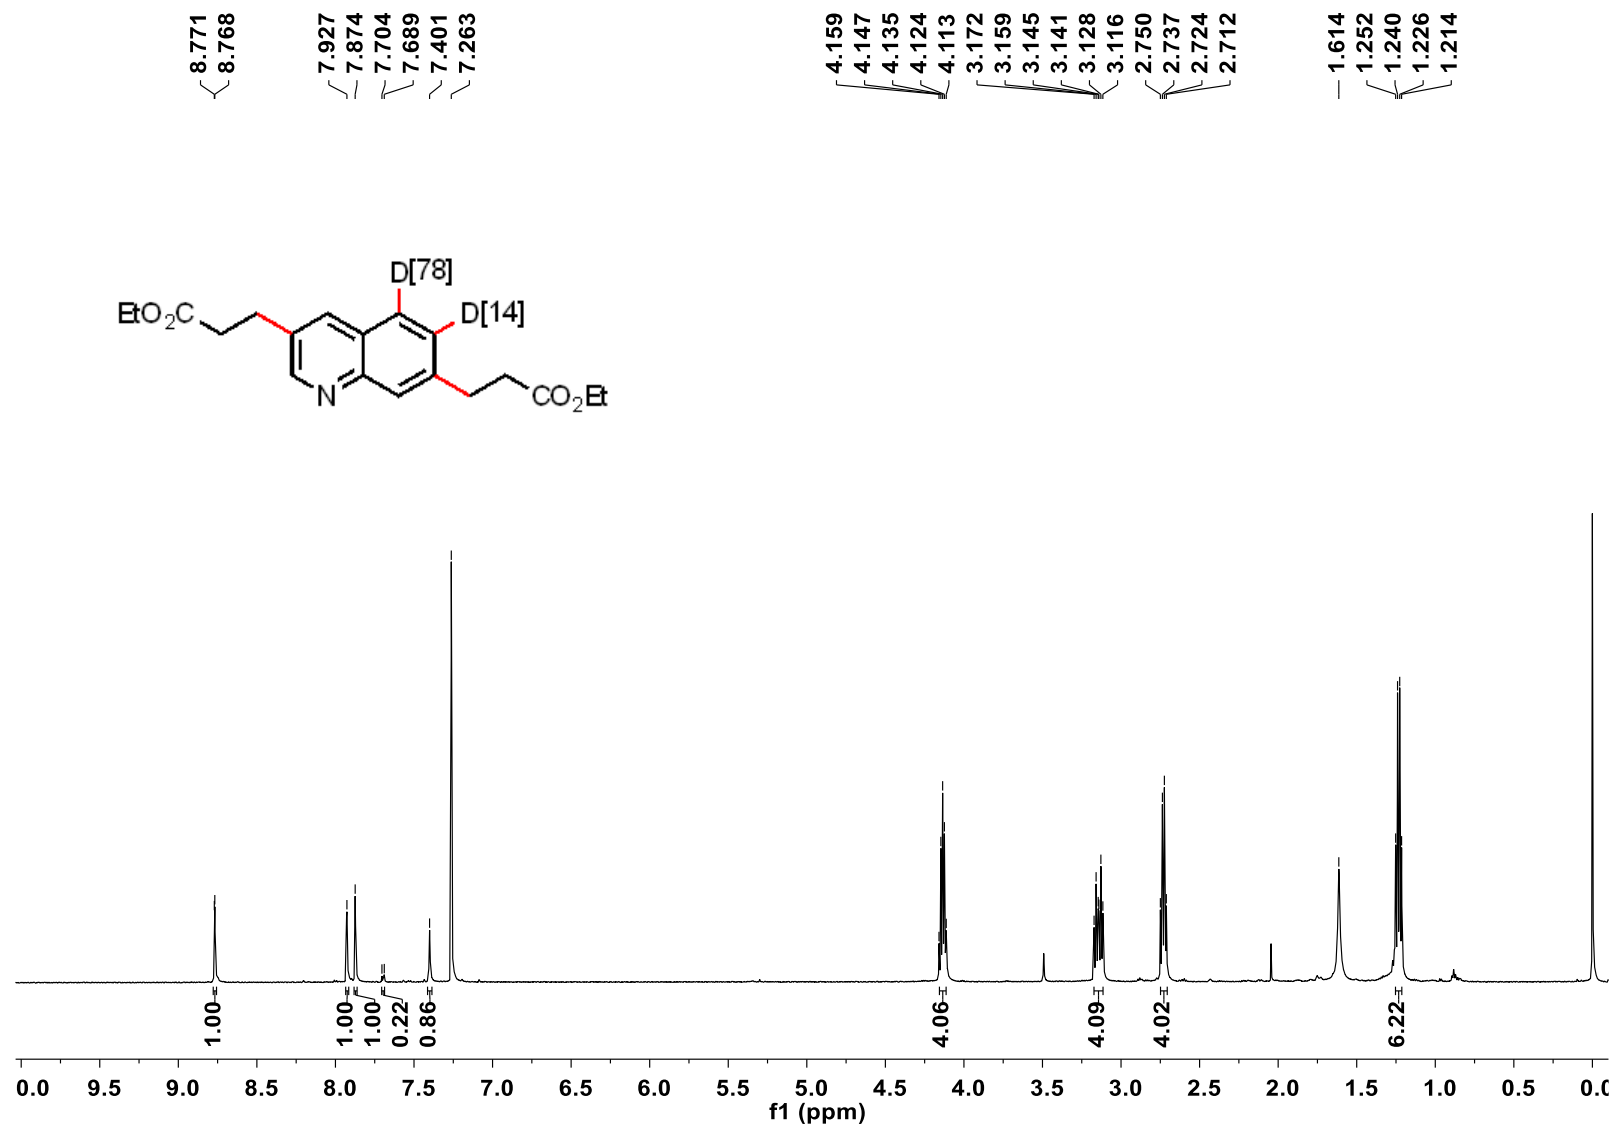

<sup>13</sup>C NMR (151 MHz, CDCl<sub>3</sub>) spectrum of **19**

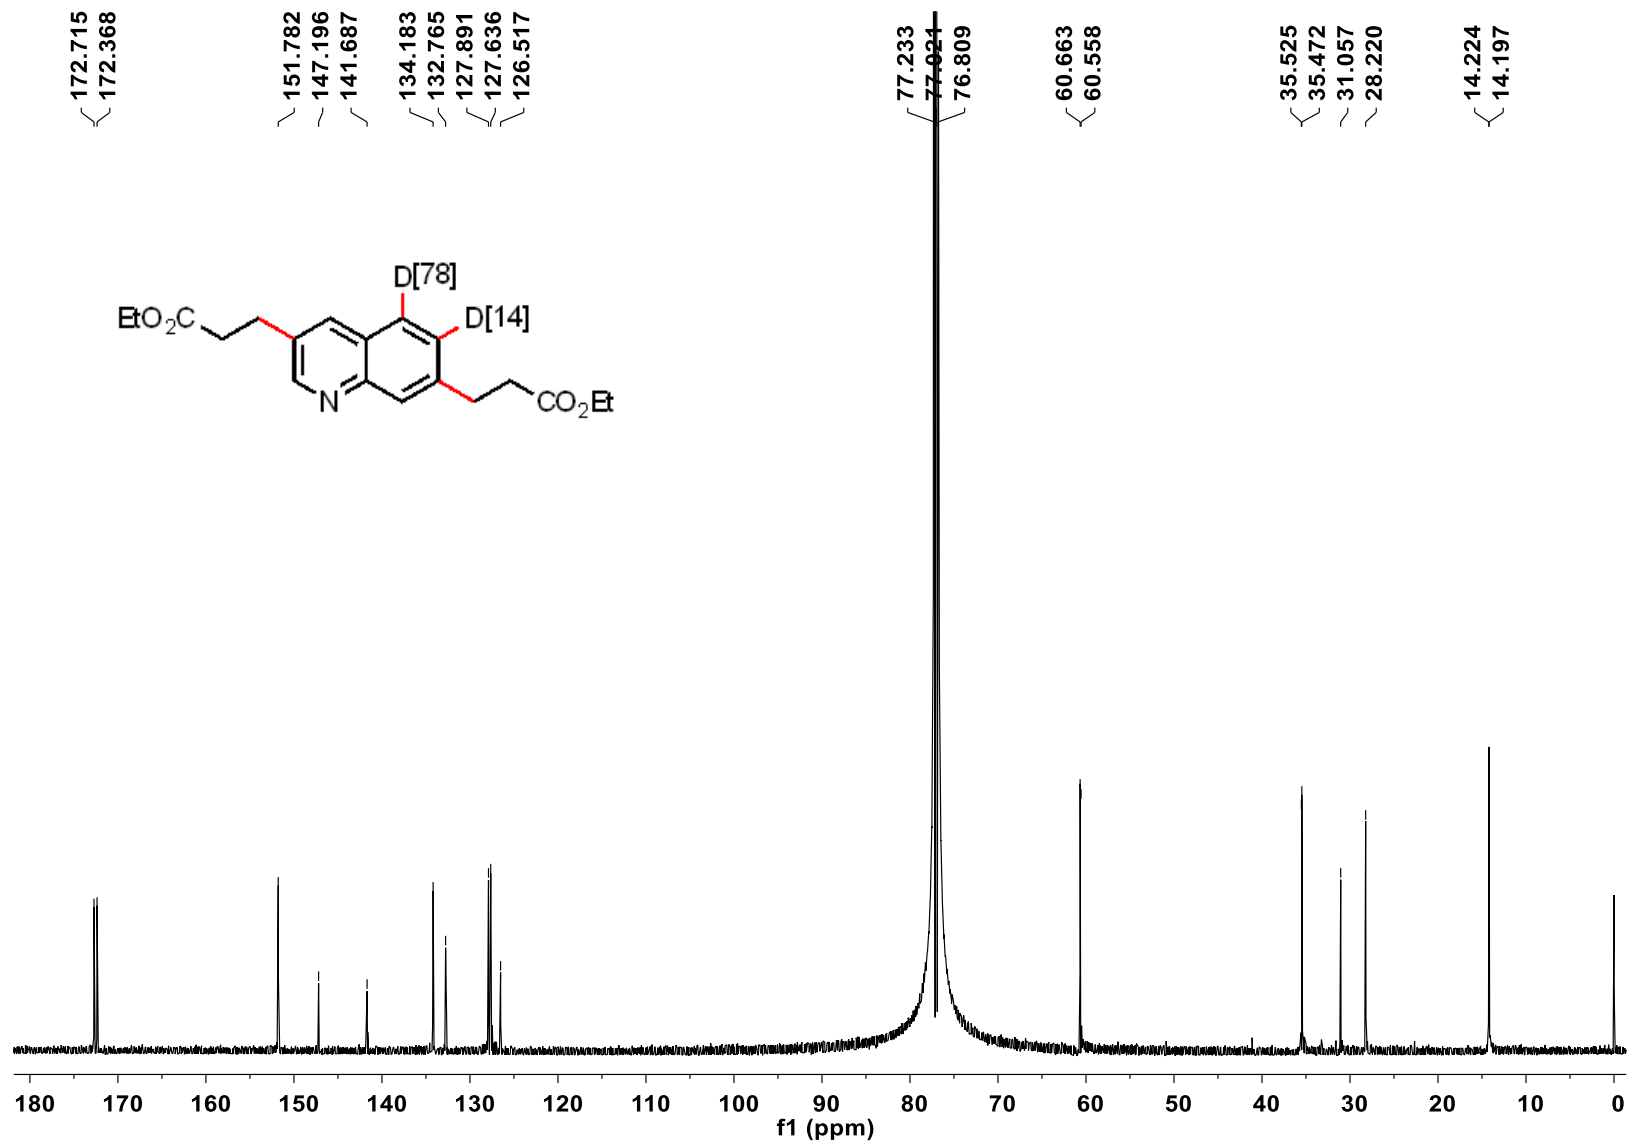

<sup>1</sup>H NMR (600 MHz, CDCl<sub>3</sub>) spectrum of **20**

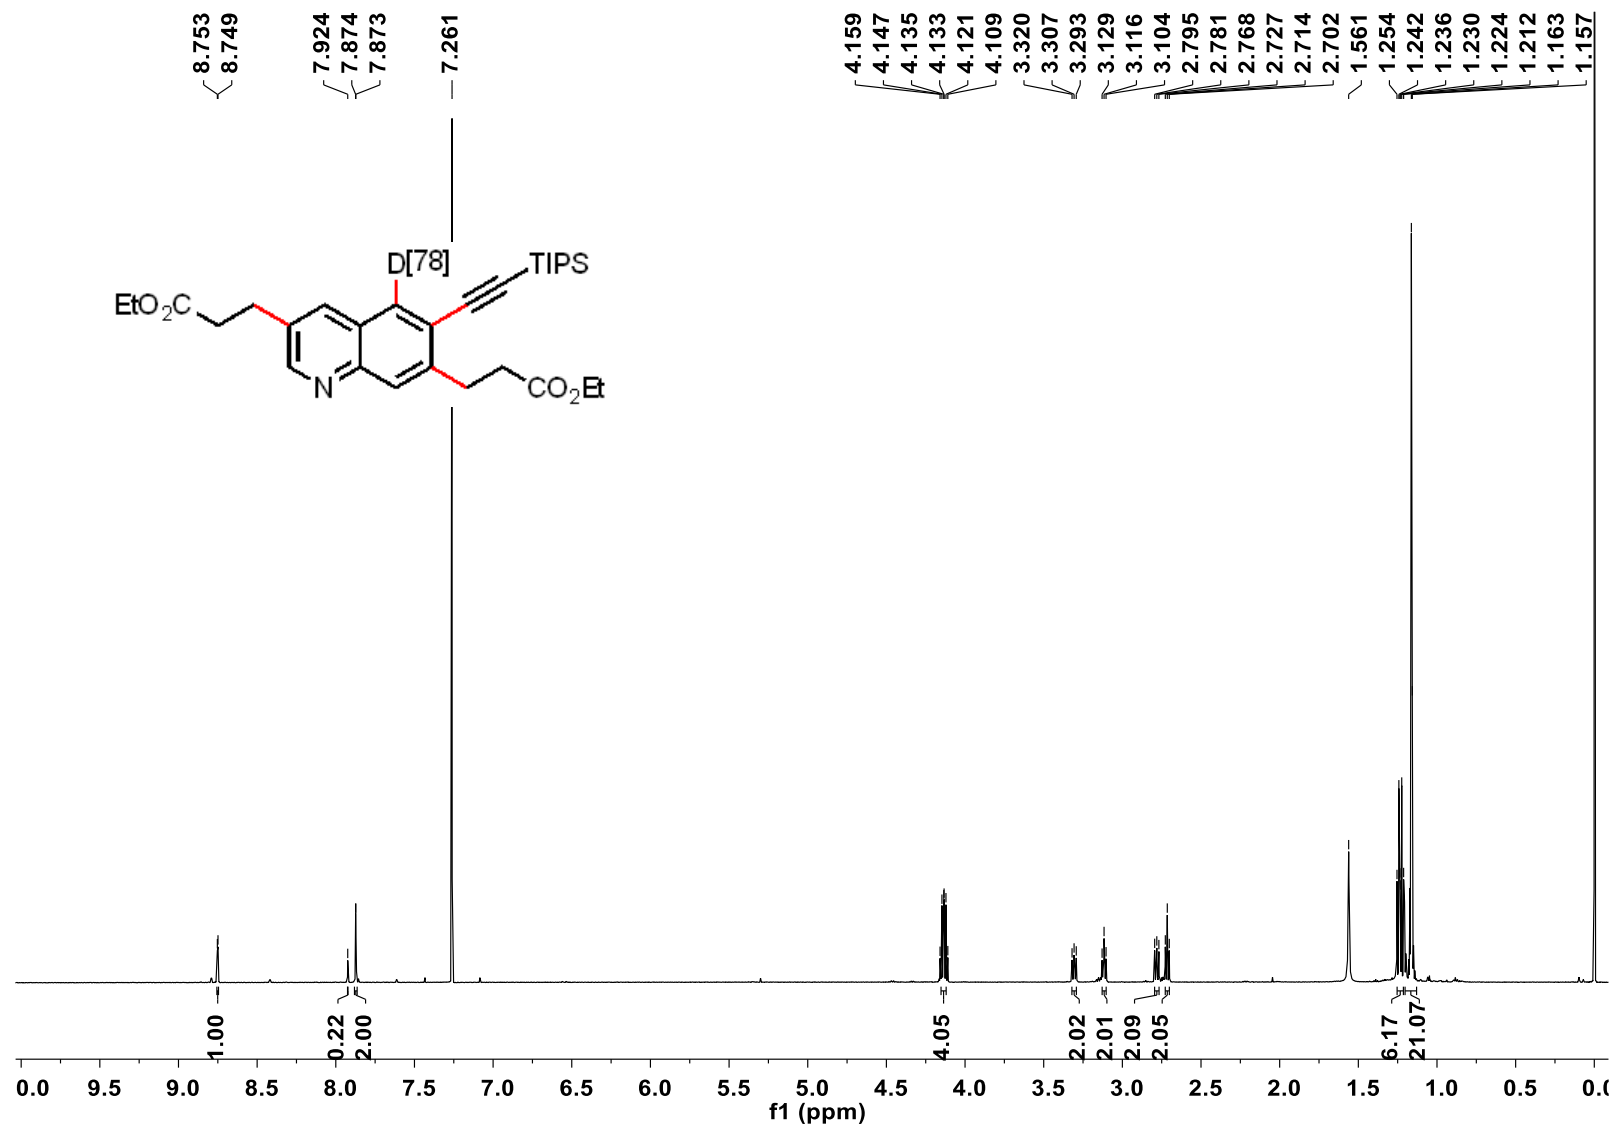

<sup>13</sup>C NMR (151 MHz, CDCl<sub>3</sub>) spectrum of **20**

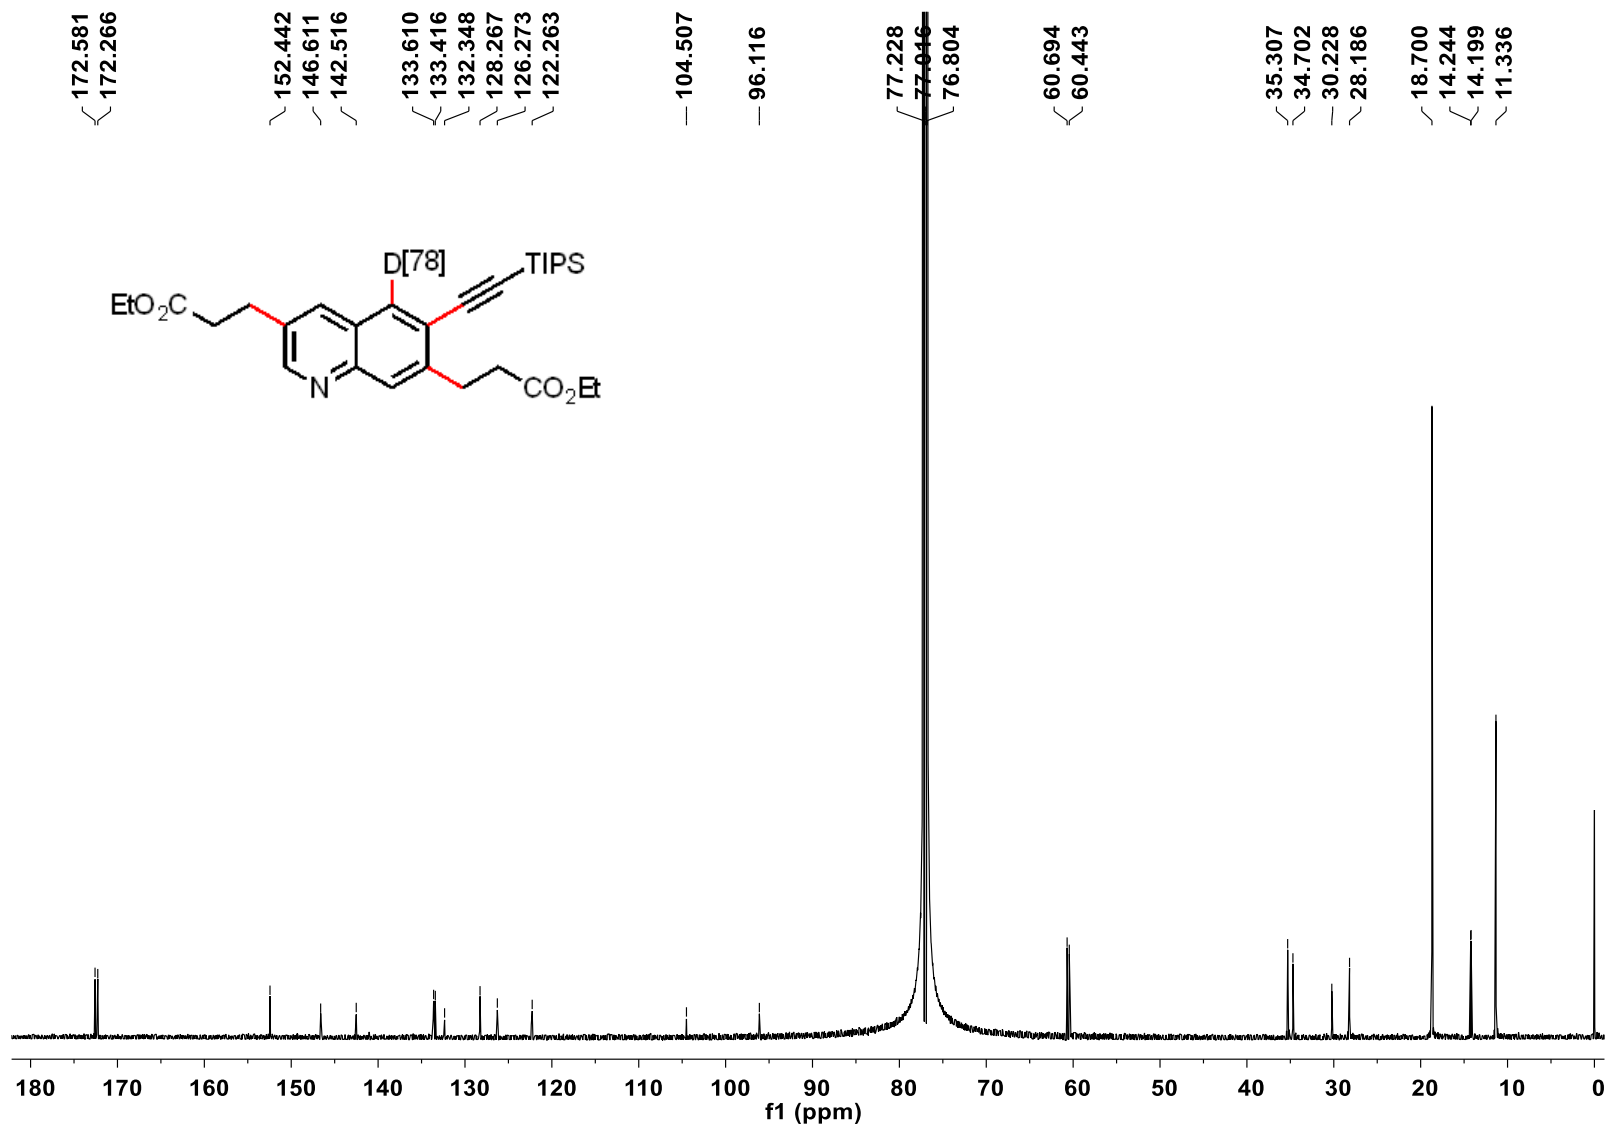

## 6. References

- 1 Ellingboe, J. W. *et al.* Antihyperglycemic activity of novel naphthalenyl 3H-1,2,3,5-Oxathiadiazole 2-Oxides. *J. Med. Chem.* **36**, 2485-2493 (1993).
- 2 Aguilar Izquierdo, N., Carrascal Riera, M., Castro Palomino Laria, J. C. & Erra Sola, M. Oxadiazole derivatives as slpl receptor agonists. WO 2010081692A1 (2010).
- 3 Xu, T. & Dong, G. Rhodium-catalyzed regioselective carboacylation of olefins: a C-C bond activation approach for accessing fused-ring systems. *Angew. Chem. Int. Ed.* **51**, 7567-7571 (2012).
- 4 Chen, P.-H., Savage, N. A. & Dong, G. Concise synthesis of functionalized benzocyclobutenones. *Tetrahedron* **70**, 4135-4146 (2014).
- 5 Willis, M. C., Brace, G. N. & Holmes, I. P. Palladium-catalyzed tandem alkenyl and aryl C-N bond formation: a cascade *N*-annulation route to 1-functionalized indoles. *Angew. Chem. Int. Ed.* **44**, 403-406 (2005).
- 6 Lenoir, D., Glaser, R., Mison, P. & Schleyer, P. V. R. Synthesis of 1,2- and 2,4-disubstituted adamantanes. The protoadamantane route. *J. Org. Chem.* **36**, 1821-1826 (1971).
- 7 Jolliffe, J. D., Armstrong, R. J. & Smith, M. D. Catalytic enantioselective synthesis of atropisomeric biaryls by a cation-directed *O*-alkylation. *Nat. Chem.* **9**, 558-562 (2017).
- 8 Clark, A. H., McCorvy, J. D., Watts, V. J. & Nichols, D. E. Assessment of dopamine D1 receptor affinity and efficacy of three tetracyclic conformationally-restricted analogs of SKF38393. *Bioorg. Med. Chem.* **19**, 5420-5431 (2011).
- 9 Beves, J. E. *et al.* Toward metal complexes that can directionally walk along tracks: controlled stepping of a molecular biped with a palladium(II) foot. *J. Am. Chem. Soc.* **136**, 2094-2100 (2014).
- 10 Zhao, Y. & Swager, T. M. Simultaneous chirality sensing of multiple amines by <sup>19</sup>F NMR. *J. Am. Chem. Soc.* **137**, 3221-3224 (2015).
- 11 Chen, Q., du Jourdin, X. M. & Knochel, P. Transition-metal-free BF<sub>3</sub>-mediated regioselective direct alkylation and arylation of functionalized pyridines using Grignard or organozinc reagents. *J. Am. Chem. Soc.* **135**, 4958-4961 (2013).
- 12 Ye, M., Gao, G.-L. & Yu, J.-Q. Ligand-promoted C-3 selective C-H olefination of pyridines with Pd catalysts. *J. Am. Chem. Soc.* **133**, 6964-6967 (2011).

- 13 Zhang, Z., Tanaka, K. & Yu, J.-Q. Remote site-selective C–H activation directed by a catalytic bifunctional template. *Nature* **543**, 538-542 (2017).
- 14 Wang, X. *et al.* General and practical potassium methoxide/disilane-mediated dehalogenative deuteration of (hetero)arylhalides. *J. Am. Chem. Soc.* **140**, 10970-10974 (2018).
- 15 Monrad, R. N. & Madsen, R. Ruthenium-catalysed synthesis of 2- and 3-substituted quinolines from anilines and 1,3-diols. *Org. Biomol. Chem.* **9**, 610-615 (2011).
- 16 Gaussian 16 Rev. B.01 (Wallingford, CT, 2016).
- 17 Perdew, J. P., Burke, K. & Ernzerhof, M. Generalized gradient approximation made simple. *Phys. Rev. Lett.* **77**, 3865-3868 (1996).
- 18 Perdew, J. P., Burke, K. & Ernzerhof, M. Generalized gradient approximation made simple. *Phys. Rev. Lett.* **78**, 1396-1396 (1997).
- 19 Grimme, S., Ehrlich, S. & Goerigk, L. Effect of the damping function in dispersion corrected density functional theory. *J. Comput. Chem.* **32**, 1456-1465 (2011).
- 20 Ditchfield, R., Hehre, W. J. & Pople, J. A. Self-consistent molecular-orbital methods. IX. An extended Gaussian-type basis for molecular-orbital studies of organic molecules. *J. Chem. Phys.* **54**, 724-728 (1971).
- 21 Hehre, W. J., Ditchfield, R. & Pople, J. A. Self—consistent molecular orbital methods. XII. Further extensions of Gaussian—type basis sets for use in molecular orbital studies of organic molecules. *J. Chem. Phys.* **56**, 2257-2261 (1972).
- 22 Hariharan, P. C. & Pople, J. A. The influence of polarization functions on molecular orbital hydrogenation energies. *Theor. Chim. Acta* **28**, 213-222 (1973).
- 23 Hay, P. J. & Wadt, W. R. Ab initio effective core potentials for molecular calculations. Potentials for K to Au including the outermost core orbitals. *J. Chem. Phys.* **82**, 299-310 (1985).
- 24 Roy, L. E., Hay, P. J. & Martin, R. L. Revised basis sets for the LANL effective core potentials. *J. Chem. Theory Comput.* **4**, 1029-1031 (2008).
- 25 Krishnan, R., Binkley, J. S., Seeger, R. & Pople, J. A. Self-consistent molecular orbital methods. XX. A basis set for correlated wave functions. *J. Chem. Phys.* **72**, 650-654 (1980).

- 26 Dolg, M., Wedig, U., Stoll, H. & Preuss, H. Energy-adjusted ab initio pseudopotentials for the first row transition elements. *J. Chem. Phys.* **86**, 866-872 (1987).
- 27 Nicklass, A., Dolg, M., Stoll, H. & Preuss, H. Ab initio energy-adjusted pseudopotentials for the noble gases Ne through Xe: Calculation of atomic dipole and quadrupole polarizabilities. *J. Chem. Phys.* **102**, 8942-8952 (1995).
- 28 Tomasi, J., Mennucci, B. & Cammi, R. Quantum mechanical continuum solvation models. *Chem. Rev.* **105**, 2999-3094 (2005).
- 29 Marenich, A. V., Cramer, C. J. & Truhlar, D. G. Universal solvation model based on solute electron density and on a continuum model of the solvent defined by the bulk dielectric constant and atomic surface tensions. *J. Phys. Chem. B* **113**, 6378-6396 (2009).
- 30 Richmond, E. *et al.* Ring-opening hydroarylation of monosubstituted cyclopropanes enabled by hexafluoroisopropanol. *Chem. Sci.* **9**, 6411-6416 (2018).
- 31 Fioroni, M., Burger, K., Mark, A. E. & Roccatano, D. Model of 1,1,1,3,3,3-hexafluoropropan-2-ol for molecular dynamics simulations. *J. Phys. Chem. B* **105**, 10967-10975 (2001).
- 32 Park, H., Chekshin, N., Shen, P.-X. & Yu, J.-Q. Ligand-enabled, palladium-catalyzed beta-C(sp<sup>3</sup>)-H arylation of Weinreb amides. *ACS Catal* **8**, 9292-9297 (2018).
- 33 Shi, H. *et al.* Differentiation and functionalization of remote C–H bonds in adjacent positions. *Nat. Chem.* **12**, 399-404 (2020).
- 34 Spartan'18 (Wavefunction, Inc. Irvine, CA, 2019).
- 35 Grimme, S. *et al.* Fully automated quantum-chemistry-based computation of spin-spin-coupled nuclear magnetic resonance spectra. *Angew. Chem. Int. Ed.* **56**, 14763-14769 (2017).
- 36 Grimme, S. Exploration of chemical compound, conformer, and reaction space with meta-dynamics simulations based on tight-binding quantum chemical calculations. *J. Chem. Theory Comput.* **15**, 2847-2862 (2019).
- 37 Grimme, S., Ehlert, S., Caldeweyher, E. & Pracht, P. A Robust non-self-consistent tight-binding quantum chemistry method for large molecules. *ChemRxiv preprint*, doi:10.26434/chemrxiv.8326202.v1 (2019).
- 38 Bannwarth, C., Ehlert, S. & Grimme, S. GFN2-xTB-An accurate and broadly parametrized self-consistent tight-binding quantum chemical method with multipole



- electrostatics and density-dependent dispersion contributions. *J. Chem. Theory Comput.* **15**, 1652-1671 (2019).
- 39 Grimme, S., Bannwarth, C. & Shushkov, P. A robust and accurate tight-binding quantum chemical method for structures, vibrational frequencies, and noncovalent interactions of large molecular systems parametrized for all spd-block elements ( $Z = 1-86$ ). *J. Chem. Theory Comput.* **13**, 1989-2009 (2017).
- 40 Grimme, S. Supramolecular binding thermodynamics by dispersion-corrected density functional theory. *Chemistry* **18**, 9955-9964 (2012).
- 41 Li, Y.-P., Gomes, J., Mallikarjun Sharada, S., Bell, A. T. & Head-Gordon, M. Improved Force-Field parameters for QM/MM simulations of the energies of adsorption for molecules in Zeolites and a free rotor correction to the rigid rotor Harmonic Oscillator model for adsorption enthalpies. *J. Phys. Chem. C* **119**, 1840-1850 (2015).
- 42 Luchini, G. A.-R. J. V. G., Y.; Funes-Ardoiz, I.; Paton, R. S. (2019). *GoodVibes v3.0.1* (2019).
- 43 CYLView, 1.0b (Université de Sherbrooke, <http://www.cylview.org>, Canada, 2009).
- 44 Buhl, M., Reimann, C., Pantazis, D. A., Bredow, T. & Neese, F. Geometries of third-row transition-metal complexes from density-functional theory. *J. Chem. Theory Comput.* **4**, 1449-1459 (2008).
- 45 Jimenez-Hoyos, C. A., Janesko, B. G. & Scuseria, G. E. Evaluation of range-separated hybrid and other density functional approaches on test sets relevant for transition metal-based homogeneous catalysts. *J Phys Chem A* **113**, 11742-11749 (2009).
- 46 Waller, M. P., Braun, H., Hojdis, N. & Buhl, M. Geometries of second-row transition-metal complexes from density-functional theory. *J. Chem. Theory Comput.* **3**, 2234-2242 (2007).
- 47 Dohm, S., Hansen, A., Steinmetz, M., Grimme, S. & Checinski, M. P. Comprehensive thermochemical benchmark set of realistic closed-shell metal organic reactions. *J. Chem. Theory Comput.* **14**, 2596-2608 (2018).
- 48 Husch, T., Freitag, L. & Reiher, M. Calculation of ligand dissociation energies in large transition-metal complexes. *J. Chem. Theory Comput.* **14**, 2456-2468 (2018).
- 49 Steinmetz, M. & Grimme, S. Benchmark study of the performance of density functional theory for bond activations with (ni,pd)-based transition-metal catalysts. *ChemistryOpen* **2**, 115-124 (2013).
